# Supplementary material for: Phosphorylation-driven conformational switching of the ArnA–ArnB complex involved in archaeal motility regulation
Source: Front Microbiol. 2026 Jan 15;16:1717585. doi: 10.3389/fmicb.2025.1717585 (PMC12852372; doi:10.3389/fmicb.2025.1717585)
Supplement: Supplementary file 2 [file Table_1.XLSX]

## Sheet: Overview
Overview of data obtained by hydrogen/deuterium exchange mass spectrometry (HDX-MS)
Protein	ArnA	ArnB
States	1) ArnA 2) ArnA/ArnB~P	1) ArnB 2) ArnB~P 3) ArnA/ArnB~P
Conditions of H/D exchange	25 °C in 20 mMTris-Cl pH 8.0, 150 mM NaCl; final D2O = 90% (v/v)
Time course of H/D exchange	10/30/100/1,000/10,000 s
Samples	50 µM concentrated solutions
Replicates	3 technical replicates (separate HDX reactions)
Number of Peptides	80	145
Average peptide length (aa)	11.31	10.12
Sequence coverage (%)	92.8	91.9
Redundancy per aa	4.76	4.2
Back-exchange	No correction for back-exchange.
Repeatability (average SD)	0.046 Da / 0.479%	0.032 Da / 0.395%
Significance criterium applied	5% difference in relative HDX

## Sheet: PeptideHDX_ArnA
Protein state	Start	End	Peptide sequence	Maximal uptake (#)	Peptide mass (Da)	Retention time SD (min)	Retention time (min)	HDX time (s)	Uptake (Da)	Uptake SD (Da)	Uptake (%)	Uptake SD (%)
ArnA	4	7	KCNL	3	476.241	7.03263	0.002228	0	0	0	0	0
ArnA	4	7	KCNL	3	476.241	6.98908	0.002449	10	0.390941	0.029964	13.0314	0.9988
ArnA	4	7	KCNL	3	476.241	6.99616	0.012304	30	0.433493	0.018383	14.4498	0.612767
ArnA	4	7	KCNL	3	476.241	6.97534	0.013932	100	0.603903	0.016964	20.1301	0.565467
ArnA	4	7	KCNL	3	476.241	6.98926	0.002248	1000	1.00216	0.013595	33.4052	0.453167
ArnA	4	7	KCNL	3	476.241	6.9745	0.019415	10000	0.983597	0.014955	32.7866	0.4985
ArnA/ArnB~P	4	7	KCNL	3	476.241	7.08803	0.005715	0	0	0	0	0
ArnA/ArnB~P	4	7	KCNL	3	476.241	7.07772	0.002245	10	0.395016	0.020069	13.1672	0.668967
ArnA/ArnB~P	4	7	KCNL	3	476.241	7.07819	0.003418	30	0.325036	0.031722	10.8345	1.0574
ArnA/ArnB~P	4	7	KCNL	3	476.241	7.04449	0.006004	100	0.547083	0.018782	18.2361	0.626067
ArnA/ArnB~P	4	7	KCNL	3	476.241	7.02527	0.01633	1000	0.941349	0.020007	31.3783	0.6669
ArnA/ArnB~P	4	7	KCNL	3	476.241	7.01527	0.009976	10000	1.00846	0.020431	33.6154	0.681033
ArnA	7	12	LCGYEN	5	697.274	7.96542	0.02426	0	0	0	0	0
ArnA	7	12	LCGYEN	5	697.274	7.96814	0.010719	10	0.831929	0.008695	16.6386	0.1739
ArnA	7	12	LCGYEN	5	697.274	7.99794	0.026873	30	0.92585	0.020583	18.517	0.41166
ArnA	7	12	LCGYEN	5	697.274	8.01602	0.000423	100	1.11659	0.01132	22.3319	0.2264
ArnA	7	12	LCGYEN	5	697.274	8.00325	0.010048	1000	1.36092	0.008843	27.2185	0.17686
ArnA	7	12	LCGYEN	5	697.274	8.00044	0.008777	10000	1.76917	0.004091	35.3834	0.08182
ArnA/ArnB~P	7	12	LCGYEN	5	697.274	7.87596	0.009659	0	0	0	0	0
ArnA/ArnB~P	7	12	LCGYEN	5	697.274	7.9321	0.017416	10	0.757366	0.008539	15.1473	0.17078
ArnA/ArnB~P	7	12	LCGYEN	5	697.274	7.97801	0.006875	30	0.842916	0.008552	16.8583	0.17104
ArnA/ArnB~P	7	12	LCGYEN	5	697.274	7.97211	0.038802	100	1.03883	0.014535	20.7767	0.2907
ArnA/ArnB~P	7	12	LCGYEN	5	697.274	7.95297	0.009257	1000	1.32505	0.010343	26.501	0.20686
ArnA/ArnB~P	7	12	LCGYEN	5	697.274	7.97737	0.022247	10000	1.68166	0.013715	33.6332	0.2743
ArnA	7	13	LCGYEND	6	812.301	8.0122	0.032483	0	0	0	0	0
ArnA	7	13	LCGYEND	6	812.301	8.02126	0.007391	10	1.39285	0.010162	23.2142	0.169367
ArnA	7	13	LCGYEND	6	812.301	8.03674	0.017732	30	1.49013	0.005424	24.8355	0.0904
ArnA	7	13	LCGYEND	6	812.301	8.0471	0.001387	100	1.65015	0.019538	27.5025	0.325633
ArnA	7	13	LCGYEND	6	812.301	8.03971	0.005557	1000	1.87885	0.006927	31.3142	0.11545
ArnA	7	13	LCGYEND	6	812.301	8.03719	0.005329	10000	2.24279	0.011987	37.3798	0.199783
ArnA/ArnB~P	7	13	LCGYEND	6	812.301	7.9172	0.00966	0	0	0	0	0
ArnA/ArnB~P	7	13	LCGYEND	6	812.301	7.97747	0.023649	10	1.30465	0.017056	21.7442	0.284267
ArnA/ArnB~P	7	13	LCGYEND	6	812.301	8.02971	0.004945	30	1.396	0.015324	23.2666	0.2554
ArnA/ArnB~P	7	13	LCGYEND	6	812.301	8.02232	0.032644	100	1.53249	0.019463	25.5415	0.324383
ArnA/ArnB~P	7	13	LCGYEND	6	812.301	8.01368	0.014296	1000	1.79697	0.016177	29.9494	0.269617
ArnA/ArnB~P	7	13	LCGYEND	6	812.301	8.02766	0.019509	10000	2.12723	0.015758	35.4538	0.262633
ArnA	7	14	LCGYENDD	7	927.327	8.01425	0.033618	0	0	0	0	0
ArnA	7	14	LCGYENDD	7	927.327	8.01965	0.010819	10	1.78925	0.016893	25.5607	0.241329
ArnA	7	14	LCGYENDD	7	927.327	8.03764	0.017857	30	1.87685	0.011083	26.8122	0.158329
ArnA	7	14	LCGYENDD	7	927.327	8.04565	0.001222	100	2.02503	0.024476	28.929	0.349657
ArnA	7	14	LCGYENDD	7	927.327	8.03862	0.005227	1000	2.2787	0.025115	32.5528	0.358786
ArnA	7	14	LCGYENDD	7	927.327	8.03727	0.004939	10000	2.61775	0.013522	37.3964	0.193171
ArnA/ArnB~P	7	14	LCGYENDD	7	927.327	7.91804	0.008854	0	0	0	0	0
ArnA/ArnB~P	7	14	LCGYENDD	7	927.327	7.98117	0.02388	10	1.60435	0.01187	22.9193	0.169571
ArnA/ArnB~P	7	14	LCGYENDD	7	927.327	8.03214	0.005687	30	1.69054	0.016413	24.1506	0.234471
ArnA/ArnB~P	7	14	LCGYENDD	7	927.327	8.02265	0.030972	100	1.84277	0.009312	26.3252	0.133029
ArnA/ArnB~P	7	14	LCGYENDD	7	927.327	8.01825	0.014864	1000	2.09	0.026092	29.8571	0.372743
ArnA/ArnB~P	7	14	LCGYENDD	7	927.327	8.02963	0.017374	10000	2.45058	0.008835	35.0083	0.126214
ArnA	7	17	LCGYENDDDAL	10	1226.48	9.32565	0.014972	0	0	0	0	0
ArnA	7	17	LCGYENDDDAL	10	1226.48	9.31129	0.019828	10	3.15355	0.03017	31.5355	0.3017
ArnA	7	17	LCGYENDDDAL	10	1226.48	9.35203	0.004987	30	3.41237	0.036927	34.1237	0.36927
ArnA	7	17	LCGYENDDDAL	10	1226.48	9.35424	0.006604	100	3.66471	0.022795	36.6471	0.22795
ArnA	7	17	LCGYENDDDAL	10	1226.48	9.34129	0.017975	1000	3.89687	0.01161	38.9687	0.1161
ArnA	7	17	LCGYENDDDAL	10	1226.48	9.34714	0.010816	10000	4.22269	0.029922	42.2269	0.29922
ArnA/ArnB~P	7	17	LCGYENDDDAL	10	1226.48	9.2721	0.008348	0	0	0	0	0
ArnA/ArnB~P	7	17	LCGYENDDDAL	10	1226.48	9.3111	0.004791	10	2.69409	0.010643	26.9409	0.10643
ArnA/ArnB~P	7	17	LCGYENDDDAL	10	1226.48	9.35462	0.008743	30	2.85353	0.005582	28.5353	0.05582
ArnA/ArnB~P	7	17	LCGYENDDDAL	10	1226.48	9.32159	0.038248	100	3.25052	0.021123	32.5052	0.21123
ArnA/ArnB~P	7	17	LCGYENDDDAL	10	1226.48	9.35416	0.006526	1000	3.54092	0.015677	35.4092	0.15677
ArnA/ArnB~P	7	17	LCGYENDDDAL	10	1226.48	9.34588	0.004952	10000	3.94601	0.012723	39.4601	0.12723
ArnA	18	21	FCIK	3	509.267	8.03014	0.029874	0	0	0	0	0
ArnA	18	21	FCIK	3	509.267	8.05464	0.007882	10	0.0347	0.013743	1.15667	0.4581
ArnA	18	21	FCIK	3	509.267	8.08849	0.023387	30	0.018484	0.024472	0.616133	0.815733
ArnA	18	21	FCIK	3	509.267	8.11052	0.003388	100	0.000496	0.016785	0.0165333	0.5595
ArnA	18	21	FCIK	3	509.267	8.09575	0.010283	1000	0.141953	0.018957	4.73177	0.6319
ArnA	18	21	FCIK	3	509.267	8.09539	0.008068	10000	0.602706	0.009379	20.0902	0.312633
ArnA/ArnB~P	18	21	FCIK	3	509.267	7.93521	0.009495	0	0	0	0	0
ArnA/ArnB~P	18	21	FCIK	3	509.267	7.97768	0.023045	10	-0.007131	0.007868	-0.2377	0.262267
ArnA/ArnB~P	18	21	FCIK	3	509.267	8.02983	0.004661	30	-0.030812	0.012737	-1.02707	0.424567
ArnA/ArnB~P	18	21	FCIK	3	509.267	8.01325	0.035638	100	-0.026582	0.007866	-0.886067	0.2622
ArnA/ArnB~P	18	21	FCIK	3	509.267	7.99799	0.00994	1000	0.017637	0.012605	0.5879	0.420167
ArnA/ArnB~P	18	21	FCIK	3	509.267	8.02082	0.020369	10000	0.29136	0.005059	9.712	0.168633
ArnA	18	23	FCIKCG	5	669.297	8.5801	0.018761	0	0	0	0	0
ArnA	18	23	FCIKCG	5	669.297	8.57405	0.010749	10	0.215764	0.011305	4.31528	0.2261
ArnA	18	23	FCIKCG	5	669.297	8.59944	0.022052	30	0.27112	0.010046	5.4224	0.20092
ArnA	18	23	FCIKCG	5	669.297	8.6281	0.005212	100	0.458858	0.00976	9.17716	0.1952
ArnA	18	23	FCIKCG	5	669.297	8.61029	0.010911	1000	1.05093	0.003705	21.0185	0.0741
ArnA	18	23	FCIKCG	5	669.297	8.6118	0.006922	10000	1.86609	0.023118	37.3218	0.46236
ArnA/ArnB~P	18	23	FCIKCG	5	669.297	8.51344	0.013505	0	0	0	0	0
ArnA/ArnB~P	18	23	FCIKCG	5	669.297	8.55297	0.009365	10	0.138448	0.007472	2.76896	0.14944
ArnA/ArnB~P	18	23	FCIKCG	5	669.297	8.58903	0.001956	30	0.150979	0.004939	3.01958	0.09878
ArnA/ArnB~P	18	23	FCIKCG	5	669.297	8.56534	0.031072	100	0.219306	0.003442	4.38612	0.06884
ArnA/ArnB~P	18	23	FCIKCG	5	669.297	8.5752	0.007223	1000	0.732303	0.009308	14.6461	0.18616
ArnA/ArnB~P	18	23	FCIKCG	5	669.297	8.57145	0.012903	10000	1.39035	0.001442	27.807	0.02884
ArnA	18	29	FCIKCGAQKSSE	11	1299.59	7.58943	0.003126	0	0	0	0	0
ArnA	18	29	FCIKCGAQKSSE	11	1299.59	7.57059	0.001539	10	3.04343	0.020525	27.6675	0.186591
ArnA	18	29	FCIKCGAQKSSE	11	1299.59	7.57633	0.004542	30	3.1303	0.048348	28.4573	0.439527
ArnA	18	29	FCIKCGAQKSSE	11	1299.59	7.55356	0.008445	100	3.32912	0.015644	30.2647	0.142218
ArnA	18	29	FCIKCGAQKSSE	11	1299.59	7.56108	0.002029	1000	3.90687	0.037748	35.517	0.343164
ArnA	18	29	FCIKCGAQKSSE	11	1299.59	7.55129	0.017933	10000	4.62305	0.112748	42.0277	1.02498
ArnA/ArnB~P	18	29	FCIKCGAQKSSE	11	1299.59	7.60743	0.007108	0	0	0	0	0
ArnA/ArnB~P	18	29	FCIKCGAQKSSE	11	1299.59	7.59274	0.002091	10	2.67281	0.027208	24.2983	0.247345
ArnA/ArnB~P	18	29	FCIKCGAQKSSE	11	1299.59	7.6076	0.004845	30	2.88472	0.019719	26.2247	0.179264
ArnA/ArnB~P	18	29	FCIKCGAQKSSE	11	1299.59	7.57481	0.005228	100	2.90096	0.017927	26.3724	0.162973
ArnA/ArnB~P	18	29	FCIKCGAQKSSE	11	1299.59	7.56733	0.016497	1000	3.57581	0.104526	32.5074	0.950236
ArnA/ArnB~P	18	29	FCIKCGAQKSSE	11	1299.59	7.56804	0.012039	10000	4.29211	0.137161	39.0192	1.24692
ArnA	22	51	CGAQKSSEAQQLPQQQPSEPQAQGVVTQQQ	26	3207.52	7.34924	0.022914	0	0	0	0	0
ArnA	22	51	CGAQKSSEAQQLPQQQPSEPQAQGVVTQQQ	26	3207.52	7.3461	0.012181	10	17.1345	0.161058	65.9019	0.619454
ArnA	22	51	CGAQKSSEAQQLPQQQPSEPQAQGVVTQQQ	26	3207.52	7.36178	0.021122	30	17.2203	0.161292	66.2321	0.620354
ArnA	22	51	CGAQKSSEAQQLPQQQPSEPQAQGVVTQQQ	26	3207.52	7.36973	0.006058	100	16.9202	0.061723	65.0779	0.237396
ArnA	22	51	CGAQKSSEAQQLPQQQPSEPQAQGVVTQQQ	26	3207.52	7.36984	0.003803	1000	16.914	0.033969	65.0537	0.13065
ArnA	22	51	CGAQKSSEAQQLPQQQPSEPQAQGVVTQQQ	26	3207.52	7.36245	0.005218	10000	16.6981	0.051556	64.2234	0.198292
ArnA/ArnB~P	22	51	CGAQKSSEAQQLPQQQPSEPQAQGVVTQQQ	26	3207.52	7.24306	0.013642	0	0	0	0	0
ArnA/ArnB~P	22	51	CGAQKSSEAQQLPQQQPSEPQAQGVVTQQQ	26	3207.52	7.32158	0.027964	10	16.8099	0.040557	64.6536	0.155988
ArnA/ArnB~P	22	51	CGAQKSSEAQQLPQQQPSEPQAQGVVTQQQ	26	3207.52	7.36764	0.007796	30	16.9233	0.009403	65.0898	0.0361654
ArnA/ArnB~P	22	51	CGAQKSSEAQQLPQQQPSEPQAQGVVTQQQ	26	3207.52	7.36072	0.02526	100	16.6122	0.079465	63.8932	0.305635
ArnA/ArnB~P	22	51	CGAQKSSEAQQLPQQQPSEPQAQGVVTQQQ	26	3207.52	7.3376	0.00948	1000	16.8926	0.030057	64.9714	0.115604
ArnA/ArnB~P	22	51	CGAQKSSEAQQLPQQQPSEPQAQGVVTQQQ	26	3207.52	7.36885	0.009929	10000	16.7092	0.091873	64.266	0.353358
ArnA	24	51	AQKSSEAQQLPQQQPSEPQAQGVVTQQQ	24	3047.49	7.31799	0.025665	0	0	0	0	0
ArnA	24	51	AQKSSEAQQLPQQQPSEPQAQGVVTQQQ	24	3047.49	7.30623	0.011429	10	16.2531	0.123116	67.7212	0.512983
ArnA	24	51	AQKSSEAQQLPQQQPSEPQAQGVVTQQQ	24	3047.49	7.32756	0.025325	30	16.2592	0.128017	67.7467	0.533404
ArnA	24	51	AQKSSEAQQLPQQQPSEPQAQGVVTQQQ	24	3047.49	7.33332	0.008699	100	15.8318	0.044463	65.9658	0.185262
ArnA	24	51	AQKSSEAQQLPQQQPSEPQAQGVVTQQQ	24	3047.49	7.33727	0.005074	1000	15.7888	0.062747	65.7868	0.261446
ArnA	24	51	AQKSSEAQQLPQQQPSEPQAQGVVTQQQ	24	3047.49	7.32736	0.006055	10000	15.5336	0.060291	64.7233	0.251213
ArnA/ArnB~P	24	51	AQKSSEAQQLPQQQPSEPQAQGVVTQQQ	24	3047.49	7.20247	0.009261	0	0	0	0	0
ArnA/ArnB~P	24	51	AQKSSEAQQLPQQQPSEPQAQGVVTQQQ	24	3047.49	7.27957	0.019672	10	15.869	0.076601	66.1208	0.319171
ArnA/ArnB~P	24	51	AQKSSEAQQLPQQQPSEPQAQGVVTQQQ	24	3047.49	7.32582	0.008938	30	16.0811	0.078927	67.0046	0.328863
ArnA/ArnB~P	24	51	AQKSSEAQQLPQQQPSEPQAQGVVTQQQ	24	3047.49	7.31744	0.034311	100	15.6997	0.083096	65.4156	0.346233
ArnA/ArnB~P	24	51	AQKSSEAQQLPQQQPSEPQAQGVVTQQQ	24	3047.49	7.29281	0.009413	1000	15.7573	0.082599	65.6553	0.344163
ArnA/ArnB~P	24	51	AQKSSEAQQLPQQQPSEPQAQGVVTQQQ	24	3047.49	7.33048	0.010518	10000	15.5709	0.047236	64.8786	0.196817
ArnA	30	50	AQQLPQQQPSEPQAQGVVTQQ	17	2289.13	7.41482	0.008182	0	0	0	0	0
ArnA	30	50	AQQLPQQQPSEPQAQGVVTQQ	17	2289.13	7.38816	0.004638	10	11.7344	0.232927	69.0258	1.37016
ArnA	30	50	AQQLPQQQPSEPQAQGVVTQQ	17	2289.13	7.38848	0.002496	30	11.4952	0.261216	67.6191	1.53656
ArnA	30	50	AQQLPQQQPSEPQAQGVVTQQ	17	2289.13	7.35767	0.012485	100	11.1935	0.049312	65.844	0.290071
ArnA	30	50	AQQLPQQQPSEPQAQGVVTQQ	17	2289.13	7.36664	0.00141	1000	11.2345	0.158839	66.0854	0.934347
ArnA	30	50	AQQLPQQQPSEPQAQGVVTQQ	17	2289.13	7.35184	0.024809	10000	11.1185	0.248325	65.4027	1.46074
ArnA/ArnB~P	30	50	AQQLPQQQPSEPQAQGVVTQQ	17	2289.13	7.43504	0.007083	0	0	0	0	0
ArnA/ArnB~P	30	50	AQQLPQQQPSEPQAQGVVTQQ	17	2289.13	7.42735	0.00148	10	11.2324	0.120095	66.0728	0.706441
ArnA/ArnB~P	30	50	AQQLPQQQPSEPQAQGVVTQQ	17	2289.13	7.42899	0.003695	30	11.997	0.041452	70.5705	0.243835
ArnA/ArnB~P	30	50	AQQLPQQQPSEPQAQGVVTQQ	17	2289.13	7.41638	0.005678	100	11.1103	0.027882	65.3548	0.164012
ArnA/ArnB~P	30	50	AQQLPQQQPSEPQAQGVVTQQ	17	2289.13	7.4067	0.005282	1000	11.2797	0.282472	66.3509	1.6616
ArnA/ArnB~P	30	50	AQQLPQQQPSEPQAQGVVTQQ	17	2289.13	7.40614	0.005063	10000	11.4361	0.33883	67.2714	1.99312
ArnA	30	51	AQQLPQQQPSEPQAQGVVTQQQ	18	2417.19	7.37431	0.004966	0	0	0	0	0
ArnA	30	51	AQQLPQQQPSEPQAQGVVTQQQ	18	2417.19	7.34735	0.007152	10	12.4651	0.215	69.2507	1.19444
ArnA	30	51	AQQLPQQQPSEPQAQGVVTQQQ	18	2417.19	7.34226	0.007536	30	12.2262	0.200069	67.9232	1.11149
ArnA	30	51	AQQLPQQQPSEPQAQGVVTQQQ	18	2417.19	7.30562	0.011684	100	11.8962	0.038886	66.09	0.216033
ArnA	30	51	AQQLPQQQPSEPQAQGVVTQQQ	18	2417.19	7.30788	0.005712	1000	11.9454	0.199342	66.3634	1.10746
ArnA	30	51	AQQLPQQQPSEPQAQGVVTQQQ	18	2417.19	7.30248	0.025473	10000	11.8388	0.269181	65.7712	1.49545
ArnA/ArnB~P	30	51	AQQLPQQQPSEPQAQGVVTQQQ	18	2417.19	7.40502	0.008042	0	0	0	0	0
ArnA/ArnB~P	30	51	AQQLPQQQPSEPQAQGVVTQQQ	18	2417.19	7.39729	0.001821	10	11.8709	0.031539	65.9492	0.175217
ArnA/ArnB~P	30	51	AQQLPQQQPSEPQAQGVVTQQQ	18	2417.19	7.39505	0.003506	30	12.5804	0.080649	69.8913	0.44805
ArnA/ArnB~P	30	51	AQQLPQQQPSEPQAQGVVTQQQ	18	2417.19	7.38775	0.004035	100	11.6821	0.052904	64.9004	0.293911
ArnA/ArnB~P	30	51	AQQLPQQQPSEPQAQGVVTQQQ	18	2417.19	7.37825	0.00571	1000	11.8809	0.389258	66.0049	2.16254
ArnA/ArnB~P	30	51	AQQLPQQQPSEPQAQGVVTQQQ	18	2417.19	7.37742	0.00449	10000	11.9816	0.376036	66.5643	2.08909
ArnA	30	59	AQQLPQQQPSEPQAQGVVTQQQVVTNPPVQ	24	3251.65	7.88757	0.006193	0	0	0	0	0
ArnA	30	59	AQQLPQQQPSEPQAQGVVTQQQVVTNPPVQ	24	3251.65	7.86657	0.001976	10	16.9901	0.358892	70.7922	1.49538
ArnA	30	59	AQQLPQQQPSEPQAQGVVTQQQVVTNPPVQ	24	3251.65	7.86988	0.002741	30	16.7171	0.349513	69.6546	1.4563
ArnA	30	59	AQQLPQQQPSEPQAQGVVTQQQVVTNPPVQ	24	3251.65	7.85468	0.004252	100	16.3409	0.028859	68.087	0.120246
ArnA	30	59	AQQLPQQQPSEPQAQGVVTQQQVVTNPPVQ	24	3251.65	7.86548	0.002938	1000	16.3153	0.273819	67.9805	1.14091
ArnA	30	59	AQQLPQQQPSEPQAQGVVTQQQVVTNPPVQ	24	3251.65	7.86084	0.015155	10000	16.1552	0.380654	67.3132	1.58606
ArnA/ArnB~P	30	59	AQQLPQQQPSEPQAQGVVTQQQVVTNPPVQ	24	3251.65	7.93904	0.006704	0	0	0	0	0
ArnA/ArnB~P	30	59	AQQLPQQQPSEPQAQGVVTQQQVVTNPPVQ	24	3251.65	7.92466	0.00469	10	16.7835	0.054952	69.9313	0.228967
ArnA/ArnB~P	30	59	AQQLPQQQPSEPQAQGVVTQQQVVTNPPVQ	24	3251.65	7.90494	0.002192	30	17.1462	0.100705	71.4424	0.419604
ArnA/ArnB~P	30	59	AQQLPQQQPSEPQAQGVVTQQQVVTNPPVQ	24	3251.65	7.90997	0.002137	100	15.9557	0.085817	66.482	0.357571
ArnA/ArnB~P	30	59	AQQLPQQQPSEPQAQGVVTQQQVVTNPPVQ	24	3251.65	7.89839	0.004099	1000	16.3884	0.455883	68.2849	1.89951
ArnA/ArnB~P	30	59	AQQLPQQQPSEPQAQGVVTQQQVVTNPPVQ	24	3251.65	7.9002	0.00742	10000	16.4838	0.465182	68.6824	1.93826
ArnA	31	34	QQLP	2	484.264	7.71332	0.025036	0	0	0	0	0
ArnA	31	34	QQLP	2	484.264	7.71779	0.004344	10	0.835885	0.003083	41.7942	0.15415
ArnA	31	34	QQLP	2	484.264	7.74439	0.019027	30	0.834429	0.007144	41.7214	0.3572
ArnA	31	34	QQLP	2	484.264	7.74857	0.004819	100	0.805301	0.003679	40.2651	0.18395
ArnA	31	34	QQLP	2	484.264	7.74473	0.005639	1000	0.806748	0.011524	40.3374	0.5762
ArnA	31	34	QQLP	2	484.264	7.73768	0.004611	10000	0.786543	0.00314	39.3272	0.157
ArnA/ArnB~P	31	34	QQLP	2	484.264	7.60866	0.010816	0	0	0	0	0
ArnA/ArnB~P	31	34	QQLP	2	484.264	7.67565	0.021103	10	0.858308	0.008269	42.9154	0.41345
ArnA/ArnB~P	31	34	QQLP	2	484.264	7.71828	0.00813	30	0.855847	0.006508	42.7923	0.3254
ArnA/ArnB~P	31	34	QQLP	2	484.264	7.713	0.028801	100	0.831654	0.004767	41.5827	0.23835
ArnA/ArnB~P	31	34	QQLP	2	484.264	7.68952	0.009026	1000	0.828084	0.004733	41.4042	0.23665
ArnA/ArnB~P	31	34	QQLP	2	484.264	7.72689	0.015451	10000	0.812068	0.004249	40.6034	0.21245
ArnA	50	61	QQVVTNPPVQAQ	9	1307.68	7.188	0.019723	0	0	0	0	0
ArnA	50	61	QQVVTNPPVQAQ	9	1307.68	7.1854	0.005666	10	5.78791	0.022521	64.3101	0.250233
ArnA	50	61	QQVVTNPPVQAQ	9	1307.68	7.20631	0.015888	30	5.73053	0.029234	63.6725	0.324822
ArnA	50	61	QQVVTNPPVQAQ	9	1307.68	7.20457	0.007505	100	5.61717	0.038729	62.413	0.430322
ArnA	50	61	QQVVTNPPVQAQ	9	1307.68	7.20402	0.000708	1000	5.59065	0.040099	62.1183	0.445544
ArnA	50	61	QQVVTNPPVQAQ	9	1307.68	7.19477	0.000817	10000	5.48443	0.01023	60.9381	0.113667
ArnA/ArnB~P	50	61	QQVVTNPPVQAQ	9	1307.68	7.0693	0.008331	0	0	0	0	0
ArnA/ArnB~P	50	61	QQVVTNPPVQAQ	9	1307.68	7.15632	0.020318	10	5.7789	0.027284	64.2101	0.303156
ArnA/ArnB~P	50	61	QQVVTNPPVQAQ	9	1307.68	7.19724	0.013911	30	5.7694	0.020318	64.1045	0.225756
ArnA/ArnB~P	50	61	QQVVTNPPVQAQ	9	1307.68	7.19331	0.025904	100	5.65628	0.036493	62.8476	0.405478
ArnA/ArnB~P	50	61	QQVVTNPPVQAQ	9	1307.68	7.16615	0.006029	1000	5.66555	0.018704	62.9506	0.207822
ArnA/ArnB~P	50	61	QQVVTNPPVQAQ	9	1307.68	7.21424	0.014185	10000	5.59066	0.025916	62.1184	0.287956
ArnA	51	59	QVVTNPPVQ	6	980.529	7.10346	0.00357	0	0	0	0	0
ArnA	51	59	QVVTNPPVQ	6	980.529	7.05767	0.005312	10	3.86736	0.04428	64.4561	0.738
ArnA	51	59	QVVTNPPVQ	6	980.529	7.05057	0.010192	30	3.84037	0.023447	64.0061	0.390783
ArnA	51	59	QVVTNPPVQ	6	980.529	7.01971	0.011811	100	3.65181	0.030666	60.8635	0.5111
ArnA	51	59	QVVTNPPVQ	6	980.529	7.02975	0.003333	1000	3.65517	0.049923	60.9195	0.83205
ArnA	51	59	QVVTNPPVQ	6	980.529	7.00723	0.023416	10000	3.69323	0.049606	61.5538	0.826767
ArnA/ArnB~P	51	59	QVVTNPPVQ	6	980.529	7.14035	0.006934	0	0	0	0	0
ArnA/ArnB~P	51	59	QVVTNPPVQ	6	980.529	7.13201	0.001441	10	3.79171	0.020237	63.1952	0.337283
ArnA/ArnB~P	51	59	QVVTNPPVQ	6	980.529	7.13002	0.003957	30	3.9651	0.025356	66.085	0.4226
ArnA/ArnB~P	51	59	QVVTNPPVQ	6	980.529	7.11235	0.00486	100	3.66186	0.020533	61.031	0.342217
ArnA/ArnB~P	51	59	QVVTNPPVQ	6	980.529	7.09781	0.00624	1000	3.69891	0.085025	61.6486	1.41708
ArnA/ArnB~P	51	59	QVVTNPPVQ	6	980.529	7.09283	0.00783	10000	3.71569	0.118804	61.9282	1.98007
ArnA	51	60	QVVTNPPVQA	7	1051.57	7.43259	0.003565	0	0	0	0	0
ArnA	51	60	QVVTNPPVQA	7	1051.57	7.40055	0.001273	10	4.64993	0.057873	66.4276	0.826757
ArnA	51	60	QVVTNPPVQA	7	1051.57	7.39731	0.004105	30	4.63425	0.061683	66.2036	0.881186
ArnA	51	60	QVVTNPPVQA	7	1051.57	7.37691	0.006382	100	4.42726	0.03083	63.2465	0.440429
ArnA	51	60	QVVTNPPVQA	7	1051.57	7.38402	0.003256	1000	4.46452	0.059593	63.7789	0.851329
ArnA	51	60	QVVTNPPVQA	7	1051.57	7.36881	0.019903	10000	4.42181	0.077742	63.1688	1.1106
ArnA/ArnB~P	51	60	QVVTNPPVQA	7	1051.57	7.45578	0.006131	0	0	0	0	0
ArnA/ArnB~P	51	60	QVVTNPPVQA	7	1051.57	7.44978	0.002301	10	4.59415	0.015075	65.6306	0.215357
ArnA/ArnB~P	51	60	QVVTNPPVQA	7	1051.57	7.44653	0.002744	30	4.75079	0.02131	67.8684	0.304429
ArnA/ArnB~P	51	60	QVVTNPPVQA	7	1051.57	7.43884	0.005364	100	4.38951	0.009149	62.7073	0.1307
ArnA/ArnB~P	51	60	QVVTNPPVQA	7	1051.57	7.42568	0.004048	1000	4.40158	0.081865	62.8798	1.1695
ArnA/ArnB~P	51	60	QVVTNPPVQA	7	1051.57	7.425	0.007156	10000	4.43458	0.153962	63.3511	2.19946
ArnA	52	57	VVTNPP	3	625.343	6.84195	0.021597	0	0	0	0	0
ArnA	52	57	VVTNPP	3	625.343	6.84661	0.003857	10	1.33838	0.015208	44.6125	0.506933
ArnA	52	57	VVTNPP	3	625.343	6.87583	0.012807	30	1.33951	0.015409	44.6503	0.513633
ArnA	52	57	VVTNPP	3	625.343	6.86361	0.004576	100	1.30679	0.017136	43.5597	0.5712
ArnA	52	57	VVTNPP	3	625.343	6.87435	0.007378	1000	1.30079	0.017132	43.3595	0.571067
ArnA	52	57	VVTNPP	3	625.343	6.84868	0.000508	10000	1.26541	0.015996	42.1804	0.5332
ArnA/ArnB~P	52	57	VVTNPP	3	625.343	6.68387	0.009087	0	0	0	0	0
ArnA/ArnB~P	52	57	VVTNPP	3	625.343	6.73102	0.019839	10	1.34037	0.006237	44.6791	0.2079
ArnA/ArnB~P	52	57	VVTNPP	3	625.343	6.77772	0.018819	30	1.33226	0.01454	44.4086	0.484667
ArnA/ArnB~P	52	57	VVTNPP	3	625.343	6.74699	0.016088	100	1.31386	0.00417	43.7952	0.139
ArnA/ArnB~P	52	57	VVTNPP	3	625.343	6.71999	0.006306	1000	1.3111	0.005177	43.7034	0.172567
ArnA/ArnB~P	52	57	VVTNPP	3	625.343	6.87127	0.020557	10000	1.29493	0.004007	43.1642	0.133567
ArnA	52	59	VVTNPPVQ	5	852.47	6.92415	0.022006	0	0	0	0	0
ArnA	52	59	VVTNPPVQ	5	852.47	6.92476	0.003241	10	3.0299	0.022415	60.5979	0.4483
ArnA	52	59	VVTNPPVQ	5	852.47	6.95193	0.011904	30	3.03821	0.022846	60.7643	0.45692
ArnA	52	59	VVTNPPVQ	5	852.47	6.93816	0.006217	100	2.95614	0.005859	59.1227	0.11718
ArnA	52	59	VVTNPPVQ	5	852.47	6.94666	0.007036	1000	2.95346	0.02736	59.0692	0.5472
ArnA	52	59	VVTNPPVQ	5	852.47	6.92612	0.000722	10000	2.90308	0.024426	58.0616	0.48852
ArnA/ArnB~P	52	59	VVTNPPVQ	5	852.47	6.76908	0.009163	0	0	0	0	0
ArnA/ArnB~P	52	59	VVTNPPVQ	5	852.47	6.83637	0.022731	10	2.95671	0.035969	59.1342	0.71938
ArnA/ArnB~P	52	59	VVTNPPVQ	5	852.47	6.88216	0.021533	30	2.96597	0.038029	59.3195	0.76058
ArnA/ArnB~P	52	59	VVTNPPVQ	5	852.47	6.85906	0.019269	100	2.9325	0.025013	58.6499	0.50026
ArnA/ArnB~P	52	59	VVTNPPVQ	5	852.47	6.83068	0.007328	1000	2.9641	0.015354	59.2821	0.30708
ArnA/ArnB~P	52	59	VVTNPPVQ	5	852.47	6.95683	0.017135	10000	2.84401	0.014913	56.8803	0.29826
ArnA	52	60	VVTNPPVQA	6	923.507	7.31884	0.021894	0	0	0	0	0
ArnA	52	60	VVTNPPVQA	6	923.507	7.31469	0.010873	10	3.63124	0.069882	60.5207	1.1647
ArnA	52	60	VVTNPPVQA	6	923.507	7.33858	0.018237	30	3.66293	0.033541	61.0488	0.559017
ArnA	52	60	VVTNPPVQA	6	923.507	7.33172	0.006683	100	3.57179	0.007857	59.5299	0.13095
ArnA	52	60	VVTNPPVQA	6	923.507	7.33297	0.000507	1000	3.56756	0.008024	59.4594	0.133733
ArnA	52	60	VVTNPPVQA	6	923.507	7.3199	0.000621	10000	3.4692	0.020894	57.8199	0.348233
ArnA/ArnB~P	52	60	VVTNPPVQA	6	923.507	7.20013	0.010637	0	0	0	0	0
ArnA/ArnB~P	52	60	VVTNPPVQA	6	923.507	7.28628	0.02038	10	3.56942	0.014108	59.4903	0.235133
ArnA/ArnB~P	52	60	VVTNPPVQA	6	923.507	7.32955	0.013537	30	3.58847	0.032382	59.8079	0.5397
ArnA/ArnB~P	52	60	VVTNPPVQA	6	923.507	7.3235	0.031453	100	3.50963	0.023965	58.4938	0.399417
ArnA/ArnB~P	52	60	VVTNPPVQA	6	923.507	7.29244	0.007095	1000	3.50208	0.009915	58.3679	0.16525
ArnA/ArnB~P	52	60	VVTNPPVQA	6	923.507	7.34588	0.014996	10000	3.44386	0.01264	57.3976	0.210667
ArnA	62	68	VATPQQP	4	739.386	6.84714	0.023	0	0	0	0	0
ArnA	62	68	VATPQQP	4	739.386	6.84833	0.003788	10	2.59823	0.023638	64.9558	0.59095
ArnA	62	68	VATPQQP	4	739.386	6.87243	0.012638	30	2.59338	0.02448	64.8345	0.612
ArnA	62	68	VATPQQP	4	739.386	6.85881	0.008333	100	2.54657	0.018007	63.6642	0.450175
ArnA	62	68	VATPQQP	4	739.386	6.87214	0.007054	1000	2.52182	0.019002	63.0455	0.47505
ArnA	62	68	VATPQQP	4	739.386	6.84922	0.000995	10000	2.48082	0.012502	62.0205	0.31255
ArnA/ArnB~P	62	68	VATPQQP	4	739.386	6.68209	0.010277	0	0	0	0	0
ArnA/ArnB~P	62	68	VATPQQP	4	739.386	6.74857	0.019568	10	2.5685	0.008911	64.2124	0.222775
ArnA/ArnB~P	62	68	VATPQQP	4	739.386	6.79935	0.023215	30	2.57614	0.014821	64.4034	0.370525
ArnA/ArnB~P	62	68	VATPQQP	4	739.386	6.76785	0.019942	100	2.51079	0.013946	62.7698	0.34865
ArnA/ArnB~P	62	68	VATPQQP	4	739.386	6.74249	0.007326	1000	2.5295	0.010292	63.2375	0.2573
ArnA/ArnB~P	62	68	VATPQQP	4	739.386	6.88481	0.019243	10000	2.5012	0.008942	62.5301	0.22355
ArnA	73	77	VLPQP	2	552.327	7.97785	0.027965	0	0	0	0	0
ArnA	73	77	VLPQP	2	552.327	7.97777	0.010847	10	1.05344	0.008214	52.6721	0.4107
ArnA	73	77	VLPQP	2	552.327	8.00509	0.025287	30	1.06405	0.010321	53.2025	0.51605
ArnA	73	77	VLPQP	2	552.327	8.02578	0.000926	100	1.02423	0.016712	51.2117	0.8356
ArnA	73	77	VLPQP	2	552.327	8.01238	0.010222	1000	0.992964	0.008206	49.6482	0.4103
ArnA	73	77	VLPQP	2	552.327	8.01281	0.009734	10000	0.977066	0.013843	48.8533	0.69215
ArnA/ArnB~P	73	77	VLPQP	2	552.327	7.88604	0.011282	0	0	0	0	0
ArnA/ArnB~P	73	77	VLPQP	2	552.327	7.94258	0.014123	10	1.03389	0.01528	51.6946	0.764
ArnA/ArnB~P	73	77	VLPQP	2	552.327	7.99165	0.004247	30	1.0208	0.012954	51.0399	0.6477
ArnA/ArnB~P	73	77	VLPQP	2	552.327	7.983	0.040225	100	1.0232	0.002028	51.1602	0.1014
ArnA/ArnB~P	73	77	VLPQP	2	552.327	7.97087	0.012712	1000	1.01873	0.005851	50.9363	0.29255
ArnA/ArnB~P	73	77	VLPQP	2	552.327	7.98905	0.026862	10000	0.999639	0.019658	49.982	0.9829
ArnA	78	101	EPAQPQPVSSTPAPQQASQPTNRY	17	2578.24	7.31471	0.020147	0	0	0	0	0
ArnA	78	101	EPAQPQPVSSTPAPQQASQPTNRY	17	2578.24	7.3263	0.006627	10	11.4872	0.093703	67.5718	0.551194
ArnA	78	101	EPAQPQPVSSTPAPQQASQPTNRY	17	2578.24	7.36076	0.019071	30	11.5037	0.141565	67.6691	0.832735
ArnA	78	101	EPAQPQPVSSTPAPQQASQPTNRY	17	2578.24	7.36784	0.006497	100	11.4541	0.060066	67.3771	0.353329
ArnA	78	101	EPAQPQPVSSTPAPQQASQPTNRY	17	2578.24	7.36652	0.004581	1000	11.9236	0.027492	70.139	0.161718
ArnA	78	101	EPAQPQPVSSTPAPQQASQPTNRY	17	2578.24	7.35984	0.003611	10000	11.8159	0.059442	69.5053	0.349659
ArnA/ArnB~P	78	101	EPAQPQPVSSTPAPQQASQPTNRY	17	2578.24	7.20676	0.009029	0	0	0	0	0
ArnA/ArnB~P	78	101	EPAQPQPVSSTPAPQQASQPTNRY	17	2578.24	7.28945	0.022744	10	11.4332	0.016973	67.2544	0.0998412
ArnA/ArnB~P	78	101	EPAQPQPVSSTPAPQQASQPTNRY	17	2578.24	7.33577	0.011156	30	11.4996	0.0281	67.6446	0.165294
ArnA/ArnB~P	78	101	EPAQPQPVSSTPAPQQASQPTNRY	17	2578.24	7.32956	0.034705	100	11.4187	0.012332	67.1686	0.0725412
ArnA/ArnB~P	78	101	EPAQPQPVSSTPAPQQASQPTNRY	17	2578.24	7.29705	0.009839	1000	11.9878	0.040891	70.5165	0.240535
ArnA/ArnB~P	78	101	EPAQPQPVSSTPAPQQASQPTNRY	17	2578.24	7.34156	0.01472	10000	11.8555	0.006457	69.7384	0.0379824
ArnA	81	101	QPQPVSSTPAPQQASQPTNRY	15	2281.11	7.2423	0.025509	0	0	0	0	0
ArnA	81	101	QPQPVSSTPAPQQASQPTNRY	15	2281.11	7.24133	0.00432	10	10.1511	0.063407	67.674	0.422713
ArnA	81	101	QPQPVSSTPAPQQASQPTNRY	15	2281.11	7.26836	0.013362	30	10.1689	0.080792	67.7929	0.538613
ArnA	81	101	QPQPVSSTPAPQQASQPTNRY	15	2281.11	7.27013	0.002953	100	10.0436	0.047899	66.9572	0.319327
ArnA	81	101	QPQPVSSTPAPQQASQPTNRY	15	2281.11	7.26905	0.000254	1000	10.5826	0.023021	70.5509	0.153473
ArnA	81	101	QPQPVSSTPAPQQASQPTNRY	15	2281.11	7.26177	0.004722	10000	10.4843	0.042616	69.8954	0.284107
ArnA/ArnB~P	81	101	QPQPVSSTPAPQQASQPTNRY	15	2281.11	7.12537	0.015648	0	0	0	0	0
ArnA/ArnB~P	81	101	QPQPVSSTPAPQQASQPTNRY	15	2281.11	7.21314	0.019756	10	10.1097	0.033137	67.3983	0.220913
ArnA/ArnB~P	81	101	QPQPVSSTPAPQQASQPTNRY	15	2281.11	7.2514	0.008244	30	10.1859	0.023713	67.9062	0.158087
ArnA/ArnB~P	81	101	QPQPVSSTPAPQQASQPTNRY	15	2281.11	7.24458	0.025048	100	10.1649	0.06558	67.7658	0.4372
ArnA/ArnB~P	81	101	QPQPVSSTPAPQQASQPTNRY	15	2281.11	7.22243	0.008117	1000	10.5741	0.024947	70.4939	0.166313
ArnA/ArnB~P	81	101	QPQPVSSTPAPQQASQPTNRY	15	2281.11	7.2536	0.011524	10000	10.5392	0.026207	70.2616	0.174713
ArnA	105	109	FIQTP	3	604.322	8.24537	0.027265	0	0	0	0	0
ArnA	105	109	FIQTP	3	604.322	8.24243	0.009561	10	0.687665	0.058291	22.9222	1.94303
ArnA	105	109	FIQTP	3	604.322	8.26011	0.018797	30	0.747116	0.058306	24.9039	1.94353
ArnA	105	109	FIQTP	3	604.322	8.27957	0.001447	100	0.795303	0.059837	26.5101	1.99457
ArnA	105	109	FIQTP	3	604.322	8.26651	0.008964	1000	1.24909	0.058209	41.6362	1.9403
ArnA	105	109	FIQTP	3	604.322	8.26646	0.005985	10000	1.42983	0.058303	47.6609	1.94343
ArnA/ArnB~P	105	109	FIQTP	3	604.322	8.15976	0.009587	0	0	0	0	0
ArnA/ArnB~P	105	109	FIQTP	3	604.322	8.21069	0.015531	10	0.687198	0.006905	22.9066	0.230167
ArnA/ArnB~P	105	109	FIQTP	3	604.322	8.25241	0.003439	30	0.755317	0.010367	25.1772	0.345567
ArnA/ArnB~P	105	109	FIQTP	3	604.322	8.2433	0.033584	100	0.828248	0.013018	27.6083	0.433933
ArnA/ArnB~P	105	109	FIQTP	3	604.322	8.23933	0.008902	1000	1.27174	0.003361	42.3913	0.112033
ArnA/ArnB~P	105	109	FIQTP	3	604.322	8.24805	0.017548	10000	1.40451	0.00423	46.817	0.141
ArnA	105	112	FIQTPNEN	6	961.45	7.66495	0.024082	0	0	0	0	0
ArnA	105	112	FIQTPNEN	6	961.45	7.66313	0.006228	10	2.80734	0.024437	46.7889	0.407283
ArnA	105	112	FIQTPNEN	6	961.45	7.67913	0.019249	30	2.86436	0.020693	47.7393	0.344883
ArnA	105	112	FIQTPNEN	6	961.45	7.6855	0.003598	100	2.84997	0.011609	47.4994	0.193483
ArnA	105	112	FIQTPNEN	6	961.45	7.68107	0.004409	1000	3.28936	0.012883	54.8227	0.214717
ArnA	105	112	FIQTPNEN	6	961.45	7.67537	0.00432	10000	3.42549	0.017122	57.0915	0.285367
ArnA/ArnB~P	105	112	FIQTPNEN	6	961.45	7.55219	0.013958	0	0	0	0	0
ArnA/ArnB~P	105	112	FIQTPNEN	6	961.45	7.63118	0.020795	10	2.75977	0.014978	45.9962	0.249633
ArnA/ArnB~P	105	112	FIQTPNEN	6	961.45	7.66991	0.007785	30	2.81275	0.023574	46.8791	0.3929
ArnA/ArnB~P	105	112	FIQTPNEN	6	961.45	7.66467	0.030151	100	2.85366	0.016676	47.561	0.277933
ArnA/ArnB~P	105	112	FIQTPNEN	6	961.45	7.64597	0.008717	1000	3.31577	0.014167	55.2628	0.236117
ArnA/ArnB~P	105	112	FIQTPNEN	6	961.45	7.67658	0.013713	10000	3.42621	0.015324	57.1035	0.2554
ArnA	105	119	FIQTPNENLVNKKVL	13	1755.99	8.5215	0.021343	0	0	0	0	0
ArnA	105	119	FIQTPNENLVNKKVL	13	1755.99	8.51566	0.011896	10	7.66429	0.060067	58.9561	0.462054
ArnA	105	119	FIQTPNENLVNKKVL	13	1755.99	8.53862	0.027753	30	7.7413	0.083923	59.5484	0.645562
ArnA	105	119	FIQTPNENLVNKKVL	13	1755.99	8.57108	0.005249	100	7.63265	0.024316	58.7127	0.187046
ArnA	105	119	FIQTPNENLVNKKVL	13	1755.99	8.5557	0.012554	1000	8.07878	0.033601	62.1445	0.258469
ArnA	105	119	FIQTPNENLVNKKVL	13	1755.99	8.55849	0.009037	10000	8.33525	0.037194	64.1173	0.286108
ArnA/ArnB~P	105	119	FIQTPNENLVNKKVL	13	1755.99	8.47359	0.011006	0	0	0	0	0
ArnA/ArnB~P	105	119	FIQTPNENLVNKKVL	13	1755.99	8.50093	0.00744	10	7.54678	0.024264	58.0522	0.186646
ArnA/ArnB~P	105	119	FIQTPNENLVNKKVL	13	1755.99	8.53467	0.000685	30	7.58917	0.023145	58.3782	0.178038
ArnA/ArnB~P	105	119	FIQTPNENLVNKKVL	13	1755.99	8.50489	0.034918	100	7.53777	0.023382	57.9828	0.179862
ArnA/ArnB~P	105	119	FIQTPNENLVNKKVL	13	1755.99	8.52797	0.006488	1000	8.0552	0.021903	61.9631	0.168485
ArnA/ArnB~P	105	119	FIQTPNENLVNKKVL	13	1755.99	8.51993	0.01238	10000	8.48228	0.025579	65.2483	0.196762
ArnA	105	122	FIQTPNENLVNKKVLLNF	16	2130.18	9.73383	0.002146	0	0	0	0	0
ArnA	105	122	FIQTPNENLVNKKVLLNF	16	2130.18	9.72259	0.008656	10	9.16775	0.165618	57.2984	1.03511
ArnA	105	122	FIQTPNENLVNKKVLLNF	16	2130.18	9.72729	0.005217	30	9.04379	0.219965	56.5237	1.37478
ArnA	105	122	FIQTPNENLVNKKVLLNF	16	2130.18	9.71454	0.001609	100	8.8403	0.033178	55.2519	0.207363
ArnA	105	122	FIQTPNENLVNKKVLLNF	16	2130.18	9.71383	0.020499	1000	9.36368	0.139213	58.523	0.870081
ArnA	105	122	FIQTPNENLVNKKVLLNF	16	2130.18	9.68883	0.014734	10000	9.66313	0.245693	60.3946	1.53558
ArnA/ArnB~P	105	122	FIQTPNENLVNKKVLLNF	16	2130.18	9.77532	0.009319	0	0	0	0	0
ArnA/ArnB~P	105	122	FIQTPNENLVNKKVLLNF	16	2130.18	9.75529	0.002123	10	8.95525	0.011831	55.9703	0.0739438
ArnA/ArnB~P	105	122	FIQTPNENLVNKKVLLNF	16	2130.18	9.75357	0.006117	30	9.49201	0.039053	59.3251	0.244081
ArnA/ArnB~P	105	122	FIQTPNENLVNKKVLLNF	16	2130.18	9.74173	0.003911	100	8.81768	0.02445	55.1105	0.152812
ArnA/ArnB~P	105	122	FIQTPNENLVNKKVLLNF	16	2130.18	9.73954	0.013399	1000	9.42576	0.33641	58.911	2.10256
ArnA/ArnB~P	105	122	FIQTPNENLVNKKVLLNF	16	2130.18	9.73934	0.007601	10000	10.1001	0.238765	63.1255	1.49228
ArnA	106	120	IQTPNENLVNKKVLL	13	1722	8.68105	0.004282	0	0	0	0	0
ArnA	106	120	IQTPNENLVNKKVLL	13	1722	8.67115	0.012472	10	7.519	0.163093	57.8385	1.25456
ArnA	106	120	IQTPNENLVNKKVLL	13	1722	8.6873	0.005826	30	7.44724	0.160889	57.2865	1.23761
ArnA	106	120	IQTPNENLVNKKVLL	13	1722	8.68205	0.001489	100	7.20232	0.017192	55.4025	0.132246
ArnA	106	120	IQTPNENLVNKKVLL	13	1722	8.69601	0.006765	1000	7.31531	0.117341	56.2716	0.902623
ArnA	106	120	IQTPNENLVNKKVLL	13	1722	8.68623	0.009301	10000	7.46399	0.183407	57.4153	1.41082
ArnA/ArnB~P	106	120	IQTPNENLVNKKVLL	13	1722	8.67924	0.005407	0	0	0	0	0
ArnA/ArnB~P	106	120	IQTPNENLVNKKVLL	13	1722	8.671	0.006959	10	7.36805	0.022996	56.6773	0.176892
ArnA/ArnB~P	106	120	IQTPNENLVNKKVLL	13	1722	8.68747	0.005879	30	7.75801	0.037601	59.677	0.289238
ArnA/ArnB~P	106	120	IQTPNENLVNKKVLL	13	1722	8.64978	0.002591	100	7.23359	0.026353	55.643	0.202715
ArnA/ArnB~P	106	120	IQTPNENLVNKKVLL	13	1722	8.64747	0.021253	1000	7.43858	0.202026	57.2198	1.55405
ArnA/ArnB~P	106	120	IQTPNENLVNKKVLL	13	1722	8.6591	0.017462	10000	7.96908	0.223266	61.3006	1.71743
ArnA	120	123	LNFD	3	507.232	8.84431	0.020975	0	0	0	0	0
ArnA	120	123	LNFD	3	507.232	8.83724	0.014778	10	1.20261	0.011768	40.0869	0.392267
ArnA	120	123	LNFD	3	507.232	8.85896	0.013549	30	1.21231	0.010864	40.4104	0.362133
ArnA	120	123	LNFD	3	507.232	8.87865	0.005303	100	1.17567	0.012291	39.1891	0.4097
ArnA	120	123	LNFD	3	507.232	8.86514	0.016272	1000	1.16903	0.01095	38.9676	0.365
ArnA	120	123	LNFD	3	507.232	8.86747	0.00625	10000	1.14465	0.010564	38.1549	0.352133
ArnA/ArnB~P	120	123	LNFD	3	507.232	8.76335	0.014845	0	0	0	0	0
ArnA/ArnB~P	120	123	LNFD	3	507.232	8.8051	0.006247	10	1.08055	0.013549	36.0183	0.451633
ArnA/ArnB~P	120	123	LNFD	3	507.232	8.84738	0.004448	30	1.07892	0.015284	35.9638	0.509467
ArnA/ArnB~P	120	123	LNFD	3	507.232	8.82307	0.033478	100	1.08106	0.015434	36.0354	0.514467
ArnA/ArnB~P	120	123	LNFD	3	507.232	8.83571	0.008248	1000	1.11989	0.00854	37.3298	0.284667
ArnA/ArnB~P	120	123	LNFD	3	507.232	8.83476	0.00773	10000	1.13387	0.005521	37.7955	0.184033
ArnA	120	125	LNFDLF	5	767.385	11.1049	0.003786	0	0	0	0	0
ArnA	120	125	LNFDLF	5	767.385	11.1297	0.024571	10	2.5418	0.023899	50.8359	0.47798
ArnA	120	125	LNFDLF	5	767.385	11.1453	0.01133	30	2.69757	0.03044	53.9513	0.6088
ArnA	120	125	LNFDLF	5	767.385	11.1538	0.011925	100	2.65535	0.017534	53.1069	0.35068
ArnA	120	125	LNFDLF	5	767.385	11.1318	0.012124	1000	2.63844	0.018341	52.7688	0.36682
ArnA	120	125	LNFDLF	5	767.385	11.1457	0.01154	10000	2.59715	0.016829	51.9431	0.33658
ArnA/ArnB~P	120	125	LNFDLF	5	767.385	11.1968	0.016906	0	0	0	0	0
ArnA/ArnB~P	120	125	LNFDLF	5	767.385	11.2203	0.016863	10	1.98864	0.025482	39.7729	0.50964
ArnA/ArnB~P	120	125	LNFDLF	5	767.385	11.2152	0.024891	30	2.22217	0.026547	44.4434	0.53094
ArnA/ArnB~P	120	125	LNFDLF	5	767.385	11.189	0.015821	100	2.4042	0.023195	48.0839	0.4639
ArnA/ArnB~P	120	125	LNFDLF	5	767.385	11.2433	0.005952	1000	2.50599	0.02467	50.1199	0.4934
ArnA/ArnB~P	120	125	LNFDLF	5	767.385	11.1622	0.010488	10000	2.48799	0.023389	49.7599	0.46778
ArnA	120	136	LNFDLFPSVSMGRSPEN	14	1908.9	10.4967	0.004986	0	0	0	0	0
ArnA	120	136	LNFDLFPSVSMGRSPEN	14	1908.9	10.4922	0.026982	10	4.75611	0.0242	33.9722	0.172857
ArnA	120	136	LNFDLFPSVSMGRSPEN	14	1908.9	10.5237	0.015633	30	5.16416	0.028205	36.8869	0.201464
ArnA	120	136	LNFDLFPSVSMGRSPEN	14	1908.9	10.5236	0.014297	100	5.38851	0.036505	38.4893	0.26075
ArnA	120	136	LNFDLFPSVSMGRSPEN	14	1908.9	10.4988	0.02685	1000	7.35433	0.025747	52.5309	0.183907
ArnA	120	136	LNFDLFPSVSMGRSPEN	14	1908.9	10.541	0.013896	10000	8.66902	0.024581	61.9216	0.175579
ArnA/ArnB~P	120	136	LNFDLFPSVSMGRSPEN	14	1908.9	10.454	0.017235	0	0	0	0	0
ArnA/ArnB~P	120	136	LNFDLFPSVSMGRSPEN	14	1908.9	10.4988	0.01819	10	3.91522	0.029252	27.9659	0.208943
ArnA/ArnB~P	120	136	LNFDLFPSVSMGRSPEN	14	1908.9	10.4858	0.033466	30	4.46183	0.017005	31.8702	0.121464
ArnA/ArnB~P	120	136	LNFDLFPSVSMGRSPEN	14	1908.9	10.4799	0.024559	100	4.96506	0.021487	35.4647	0.153479
ArnA/ArnB~P	120	136	LNFDLFPSVSMGRSPEN	14	1908.9	10.5045	0.012363	1000	5.7569	0.02447	41.1207	0.174786
ArnA/ArnB~P	120	136	LNFDLFPSVSMGRSPEN	14	1908.9	10.52	0.021275	10000	7.05791	0.042239	50.4137	0.301707
ArnA	121	125	NFDLF	4	654.301	11.1691	0.005853	0	0	0	0	0
ArnA	121	125	NFDLF	4	654.301	11.1507	0.007249	10	1.82215	0.034274	45.5537	0.85685
ArnA	121	125	NFDLF	4	654.301	11.1488	0.005719	30	1.89295	0.042159	47.3238	1.05398
ArnA	121	125	NFDLF	4	654.301	11.132	0.001685	100	1.85347	0.010195	46.3367	0.254875
ArnA	121	125	NFDLF	4	654.301	11.1064	0.027521	1000	1.86631	0.027986	46.6578	0.69965
ArnA	121	125	NFDLF	4	654.301	11.074	0.01648	10000	1.82969	0.044739	45.7424	1.11848
ArnA/ArnB~P	121	125	NFDLF	4	654.301	11.2363	0.011637	0	0	0	0	0
ArnA/ArnB~P	121	125	NFDLF	4	654.301	11.2159	0.010236	10	1.42062	0.010846	35.5156	0.27115
ArnA/ArnB~P	121	125	NFDLF	4	654.301	11.2146	0.00389	30	1.77121	0.007874	44.2802	0.19685
ArnA/ArnB~P	121	125	NFDLF	4	654.301	11.2057	0.005666	100	1.79821	0.004856	44.9551	0.1214
ArnA/ArnB~P	121	125	NFDLF	4	654.301	11.2032	0.006815	1000	1.88539	0.063402	47.1347	1.58505
ArnA/ArnB~P	121	125	NFDLF	4	654.301	11.1962	0.007715	10000	1.89277	0.057603	47.3194	1.44007
ArnA	122	125	FDLF	3	540.258	11.2449	0.002663	0	0	0	0	0
ArnA	122	125	FDLF	3	540.258	11.2096	0.008945	10	1.39284	0.020073	46.428	0.6691
ArnA	122	125	FDLF	3	540.258	11.2151	0.007314	30	1.50686	0.023093	50.2287	0.769767
ArnA	122	125	FDLF	3	540.258	11.2029	0.002107	100	1.49824	0.007095	49.9414	0.2365
ArnA	122	125	FDLF	3	540.258	11.1761	0.027292	1000	1.50873	0.019229	50.2909	0.640967
ArnA	122	125	FDLF	3	540.258	11.1439	0.019777	10000	1.47935	0.033674	49.3116	1.12247
ArnA/ArnB~P	122	125	FDLF	3	540.258	11.2426	0.016527	0	0	0	0	0
ArnA/ArnB~P	122	125	FDLF	3	540.258	11.2224	0.01184	10	1.01828	0.017829	33.9428	0.5943
ArnA/ArnB~P	122	125	FDLF	3	540.258	11.2449	0.0046	30	1.32912	0.021326	44.3039	0.710867
ArnA/ArnB~P	122	125	FDLF	3	540.258	11.251	0.004172	100	1.41709	0.008454	47.2362	0.2818
ArnA/ArnB~P	122	125	FDLF	3	540.258	11.261	0.010496	1000	1.51954	0.04371	50.6514	1.457
ArnA/ArnB~P	122	125	FDLF	3	540.258	11.2521	0.003779	10000	1.52448	0.057023	50.8161	1.90077
ArnA	122	126	FDLFP	3	637.311	11.1353	0.007813	0	0	0	0	0
ArnA	122	126	FDLFP	3	637.311	11.1465	0.029911	10	1.42138	0.014409	47.3792	0.4803
ArnA	122	126	FDLFP	3	637.311	11.1672	0.013683	30	1.5586	0.016296	51.9534	0.5432
ArnA	122	126	FDLFP	3	637.311	11.1724	0.011769	100	1.5456	0.011423	51.5198	0.380767
ArnA	122	126	FDLFP	3	637.311	11.1605	0.009204	1000	1.53741	0.012816	51.2469	0.4272
ArnA	122	126	FDLFP	3	637.311	11.1749	0.012676	10000	1.52208	0.016851	50.7361	0.5617
ArnA/ArnB~P	122	126	FDLFP	3	637.311	11.1089	0.017129	0	0	0	0	0
ArnA/ArnB~P	122	126	FDLFP	3	637.311	11.1597	0.019458	10	1.02811	0.009543	34.2703	0.3181
ArnA/ArnB~P	122	126	FDLFP	3	637.311	11.1586	0.04405	30	1.23955	0.010512	41.3185	0.3504
ArnA/ArnB~P	122	126	FDLFP	3	637.311	11.1331	0.03471	100	1.46987	0.016128	48.9956	0.5376
ArnA/ArnB~P	122	126	FDLFP	3	637.311	11.182	0.019594	1000	1.54678	0.010811	51.5594	0.360367
ArnA/ArnB~P	122	126	FDLFP	3	637.311	11.1707	0.015243	10000	1.55618	0.007431	51.8728	0.2477
ArnA	122	136	FDLFPSVSMGRSPEN	12	1681.78	10.2484	0.003059	0	0	0	0	0
ArnA	122	136	FDLFPSVSMGRSPEN	12	1681.78	10.2387	0.024393	10	3.44272	0.020987	28.6893	0.174892
ArnA	122	136	FDLFPSVSMGRSPEN	12	1681.78	10.2724	0.013141	30	3.85438	0.030047	32.1199	0.250392
ArnA	122	136	FDLFPSVSMGRSPEN	12	1681.78	10.2778	0.01443	100	4.16269	0.070017	34.6891	0.583475
ArnA	122	136	FDLFPSVSMGRSPEN	12	1681.78	10.2512	0.025772	1000	6.10433	0.044171	50.8694	0.368092
ArnA	122	136	FDLFPSVSMGRSPEN	12	1681.78	10.2899	0.012839	10000	7.40236	0.040354	61.6863	0.336283
ArnA/ArnB~P	122	136	FDLFPSVSMGRSPEN	12	1681.78	10.2044	0.016859	0	0	0	0	0
ArnA/ArnB~P	122	136	FDLFPSVSMGRSPEN	12	1681.78	10.2345	0.016486	10	2.68074	0.017696	22.3395	0.147467
ArnA/ArnB~P	122	136	FDLFPSVSMGRSPEN	12	1681.78	10.2318	0.031959	30	3.17117	0.012402	26.4264	0.10335
ArnA/ArnB~P	122	136	FDLFPSVSMGRSPEN	12	1681.78	10.2279	0.016297	100	3.67551	0.013122	30.6293	0.10935
ArnA/ArnB~P	122	136	FDLFPSVSMGRSPEN	12	1681.78	10.2551	0.003618	1000	4.47937	0.015315	37.3281	0.127625
ArnA/ArnB~P	122	136	FDLFPSVSMGRSPEN	12	1681.78	10.262	0.023982	10000	5.7624	0.027934	48.02	0.232783
ArnA	123	126	DLFP	2	490.242	10.113	0.006844	0	0	0	0	0
ArnA	123	126	DLFP	2	490.242	10.1024	0.022543	10	0.575301	0.019676	28.765	0.9838
ArnA	123	126	DLFP	2	490.242	10.133	0.006979	30	0.70102	0.019633	35.051	0.98165
ArnA	123	126	DLFP	2	490.242	10.1389	0.011515	100	0.733557	0.019787	36.6778	0.98935
ArnA	123	126	DLFP	2	490.242	10.1145	0.020594	1000	0.724637	0.020188	36.2319	1.0094
ArnA	123	126	DLFP	2	490.242	10.1397	0.009882	10000	0.715363	0.019413	35.7681	0.97065
ArnA/ArnB~P	123	126	DLFP	2	490.242	10.0739	0.00977	0	0	0	0	0
ArnA/ArnB~P	123	126	DLFP	2	490.242	10.0997	0.012199	10	0.313721	0.01509	15.6861	0.7545
ArnA/ArnB~P	123	126	DLFP	2	490.242	10.1174	0.020934	30	0.463585	0.016815	23.1792	0.84075
ArnA/ArnB~P	123	126	DLFP	2	490.242	10.1057	0.00989	100	0.657085	0.013849	32.8543	0.69245
ArnA/ArnB~P	123	126	DLFP	2	490.242	10.1338	0.010549	1000	0.748895	0.014858	37.4447	0.7429
ArnA/ArnB~P	123	126	DLFP	2	490.242	10.1255	0.019329	10000	0.744912	0.014672	37.2456	0.7336
ArnA	123	129	DLFPSVS	5	763.375	9.61766	0.004582	0	0	0	0	0
ArnA	123	129	DLFPSVS	5	763.375	9.62303	0.011876	10	1.4402	0.025824	28.804	0.51648
ArnA	123	129	DLFPSVS	5	763.375	9.62546	0.006628	30	1.52769	0.033117	30.5539	0.66234
ArnA	123	129	DLFPSVS	5	763.375	9.61002	0.003238	100	1.88103	0.016626	37.6205	0.33252
ArnA	123	129	DLFPSVS	5	763.375	9.61172	0.02364	1000	2.64358	0.050116	52.8716	1.00232
ArnA	123	129	DLFPSVS	5	763.375	9.58909	0.0185	10000	2.79284	0.066853	55.8568	1.33706
ArnA/ArnB~P	123	129	DLFPSVS	5	763.375	9.9135	0.0057	0	0	0	0	0
ArnA/ArnB~P	123	129	DLFPSVS	5	763.375	9.90543	0.002207	10	0.994683	0.020024	19.8937	0.40048
ArnA/ArnB~P	123	129	DLFPSVS	5	763.375	9.90161	0.001897	30	1.53633	0.020004	30.7267	0.40008
ArnA/ArnB~P	123	129	DLFPSVS	5	763.375	9.89668	0.002861	100	1.86053	0.007424	37.2106	0.14848
ArnA/ArnB~P	123	129	DLFPSVS	5	763.375	9.89432	0.008862	1000	2.30279	0.048887	46.0558	0.97774
ArnA/ArnB~P	123	129	DLFPSVS	5	763.375	9.89669	0.004348	10000	2.75915	0.082551	55.1831	1.65102
ArnA	123	130	DLFPSVSM	6	894.415	10.6002	0.004189	0	0	0	0	0
ArnA	123	130	DLFPSVSM	6	894.415	10.5764	0.007217	10	1.53206	0.018119	25.5343	0.301983
ArnA	123	130	DLFPSVSM	6	894.415	10.5741	0.006002	30	1.82746	0.023925	30.4576	0.39875
ArnA	123	130	DLFPSVSM	6	894.415	10.5603	0.002341	100	1.95363	0.009517	32.5604	0.158617
ArnA	123	130	DLFPSVSM	6	894.415	10.5462	0.020214	1000	2.61586	0.022274	43.5976	0.371233
ArnA	123	130	DLFPSVSM	6	894.415	10.5182	0.016898	10000	3.15832	0.0557	52.6387	0.928333
ArnA/ArnB~P	123	130	DLFPSVSM	6	894.415	10.6391	0.0064	0	0	0	0	0
ArnA/ArnB~P	123	130	DLFPSVSM	6	894.415	10.6293	0.006318	10	0.957892	0.014321	15.9649	0.238683
ArnA/ArnB~P	123	130	DLFPSVSM	6	894.415	10.6089	0.004295	30	1.46832	0.020706	24.472	0.3451
ArnA/ArnB~P	123	130	DLFPSVSM	6	894.415	10.6091	0.003377	100	1.81406	0.012133	30.2344	0.202217
ArnA/ArnB~P	123	130	DLFPSVSM	6	894.415	10.6049	0.004883	1000	2.28117	0.047661	38.0195	0.79435
ArnA/ArnB~P	123	130	DLFPSVSM	6	894.415	10.604	0.003	10000	2.80771	0.077326	46.7952	1.28877
ArnA	123	136	DLFPSVSMGRSPEN	11	1534.71	9.51141	0.010659	0	0	0	0	0
ArnA	123	136	DLFPSVSMGRSPEN	11	1534.71	9.50413	0.021475	10	2.39787	0.046695	21.7988	0.4245
ArnA	123	136	DLFPSVSMGRSPEN	11	1534.71	9.53662	0.007418	30	2.81307	0.022078	25.5734	0.200709
ArnA	123	136	DLFPSVSMGRSPEN	11	1534.71	9.5358	0.008197	100	3.14446	0.038004	28.586	0.345491
ArnA	123	136	DLFPSVSMGRSPEN	11	1534.71	9.51997	0.017852	1000	4.98277	0.013986	45.2979	0.127145
ArnA	123	136	DLFPSVSMGRSPEN	11	1534.71	9.53661	0.010841	10000	6.34196	0.027322	57.6542	0.248382
ArnA/ArnB~P	123	136	DLFPSVSMGRSPEN	11	1534.71	9.48327	0.011133	0	0	0	0	0
ArnA/ArnB~P	123	136	DLFPSVSMGRSPEN	11	1534.71	9.51439	0.006236	10	1.86685	0.019592	16.9713	0.178109
ArnA/ArnB~P	123	136	DLFPSVSMGRSPEN	11	1534.71	9.54328	0.015098	30	2.32106	0.01641	21.1005	0.149182
ArnA/ArnB~P	123	136	DLFPSVSMGRSPEN	11	1534.71	9.53159	0.015278	100	2.71578	0.039082	24.6889	0.355291
ArnA/ArnB~P	123	136	DLFPSVSMGRSPEN	11	1534.71	9.55321	0.015978	1000	3.48126	0.018875	31.6478	0.171591
ArnA/ArnB~P	123	136	DLFPSVSMGRSPEN	11	1534.71	9.54219	0.011873	10000	4.89887	0.021213	44.5352	0.192845
ArnA	126	130	PSVSM	3	519.236	7.95993	0.025586	0	0	0	0	0
ArnA	126	130	PSVSM	3	519.236	7.95972	0.00789	10	0.697212	0.008958	23.2404	0.2986
ArnA	126	130	PSVSM	3	519.236	7.98962	0.029544	30	0.865009	0.014557	28.8336	0.485233
ArnA	126	130	PSVSM	3	519.236	8.00948	0.002727	100	0.950813	0.01332	31.6938	0.444
ArnA	126	130	PSVSM	3	519.236	7.99467	0.00788	1000	1.64639	0.008937	54.8797	0.2979
ArnA	126	130	PSVSM	3	519.236	7.99042	0.00735	10000	2.30078	0.020999	76.6927	0.699967
ArnA/ArnB~P	126	130	PSVSM	3	519.236	7.87188	0.00874	0	0	0	0	0
ArnA/ArnB~P	126	130	PSVSM	3	519.236	7.92226	0.018299	10	0.455155	0.011641	15.1718	0.388033
ArnA/ArnB~P	126	130	PSVSM	3	519.236	7.96045	0.006573	30	0.66099	0.00464	22.033	0.154667
ArnA/ArnB~P	126	130	PSVSM	3	519.236	7.95935	0.034358	100	0.834646	0.012927	27.8215	0.4309
ArnA/ArnB~P	126	130	PSVSM	3	519.236	7.94009	0.008555	1000	1.17822	0.003363	39.2739	0.1121
ArnA/ArnB~P	126	130	PSVSM	3	519.236	7.96229	0.018829	10000	1.6456	0.009147	54.8535	0.3049
ArnA	126	136	PSVSMGRSPEN	8	1159.53	7.08388	0.019729	0	0	0	0	0
ArnA	126	136	PSVSMGRSPEN	8	1159.53	7.0954	0.003886	10	1.51152	0.026159	18.894	0.326988
ArnA	126	136	PSVSMGRSPEN	8	1159.53	7.13145	0.010067	30	1.66785	0.028306	20.8482	0.353825
ArnA	126	136	PSVSMGRSPEN	8	1159.53	7.13017	0.005462	100	1.91257	0.029939	23.9072	0.374238
ArnA	126	136	PSVSMGRSPEN	8	1159.53	7.13021	0.004717	1000	3.80565	0.033913	47.5706	0.423912
ArnA	126	136	PSVSMGRSPEN	8	1159.53	7.11254	0.003145	10000	5.18954	0.027739	64.8692	0.346737
ArnA/ArnB~P	126	136	PSVSMGRSPEN	8	1159.53	6.94774	0.009862	0	0	0	0	0
ArnA/ArnB~P	126	136	PSVSMGRSPEN	8	1159.53	7.03461	0.023432	10	1.22046	0.019388	15.2557	0.24235
ArnA/ArnB~P	126	136	PSVSMGRSPEN	8	1159.53	7.07655	0.014445	30	1.4004	0.012342	17.505	0.154275
ArnA/ArnB~P	126	136	PSVSMGRSPEN	8	1159.53	7.06536	0.023898	100	1.56257	0.012069	19.5321	0.150863
ArnA/ArnB~P	126	136	PSVSMGRSPEN	8	1159.53	7.03368	0.00419	1000	2.21197	0.015414	27.6496	0.192675
ArnA/ArnB~P	126	136	PSVSMGRSPEN	8	1159.53	7.10467	0.017415	10000	3.51383	0.010073	43.9228	0.125913
ArnA	127	136	SVSMGRSPEN	8	1062.48	6.75528	0.018453	0	0	0	0	0
ArnA	127	136	SVSMGRSPEN	8	1062.48	6.77086	0.002767	10	1.49115	0.033097	18.6394	0.413713
ArnA	127	136	SVSMGRSPEN	8	1062.48	6.81085	0.010008	30	1.61513	0.031063	20.1891	0.388288
ArnA	127	136	SVSMGRSPEN	8	1062.48	6.80225	0.008738	100	1.76995	0.108557	22.1244	1.35696
ArnA	127	136	SVSMGRSPEN	8	1062.48	6.81211	0.007825	1000	3.32621	0.015666	41.5776	0.195825
ArnA	127	136	SVSMGRSPEN	8	1062.48	6.79011	0.000822	10000	4.51584	0.026558	56.448	0.331975
ArnA/ArnB~P	127	136	SVSMGRSPEN	8	1062.48	6.58893	0.011851	0	0	0	0	0
ArnA/ArnB~P	127	136	SVSMGRSPEN	8	1062.48	6.62771	0.021148	10	1.33849	0.020673	16.7311	0.258412
ArnA/ArnB~P	127	136	SVSMGRSPEN	8	1062.48	6.68646	0.027336	30	1.53083	0.047428	19.1354	0.59285
ArnA/ArnB~P	127	136	SVSMGRSPEN	8	1062.48	6.64048	0.022987	100	1.56659	0.030921	19.5823	0.386512
ArnA/ArnB~P	127	136	SVSMGRSPEN	8	1062.48	6.61166	0.003706	1000	1.89938	0.018728	23.7423	0.2341
ArnA/ArnB~P	127	136	SVSMGRSPEN	8	1062.48	6.77599	0.020118	10000	2.88101	0.016552	36.0126	0.2069
ArnA	137	142	IVIVPD	4	654.395	8.76242	0.018976	0	0	0	0	0
ArnA	137	142	IVIVPD	4	654.395	8.74794	0.012019	10	0.417386	0.006787	10.4346	0.169675
ArnA	137	142	IVIVPD	4	654.395	8.76564	0.016761	30	0.652193	0.011257	16.3048	0.281425
ArnA	137	142	IVIVPD	4	654.395	8.78777	0.003597	100	1.06674	0.01922	26.6684	0.4805
ArnA	137	142	IVIVPD	4	654.395	8.77374	0.013732	1000	1.43722	0.006879	35.9305	0.171975
ArnA	137	142	IVIVPD	4	654.395	8.77604	0.00806	10000	1.67772	0.011143	41.943	0.278575
ArnA/ArnB~P	137	142	IVIVPD	4	654.395	8.69969	0.011877	0	0	0	0	0
ArnA/ArnB~P	137	142	IVIVPD	4	654.395	8.74466	0.006164	10	0.183375	0.012661	4.58438	0.316525
ArnA/ArnB~P	137	142	IVIVPD	4	654.395	8.78436	0.004422	30	0.321669	0.012954	8.04172	0.32385
ArnA/ArnB~P	137	142	IVIVPD	4	654.395	8.76315	0.035383	100	0.731155	0.021755	18.2789	0.543875
ArnA/ArnB~P	137	142	IVIVPD	4	654.395	8.77397	0.006671	1000	1.37989	0.008625	34.4972	0.215625
ArnA/ArnB~P	137	142	IVIVPD	4	654.395	8.76806	0.00894	10000	1.38339	0.010672	34.5849	0.2668
ArnA	137	144	IVIVPDSE	6	870.469	8.59721	0.018471	0	0	0	0	0
ArnA	137	144	IVIVPDSE	6	870.469	8.58146	0.010506	10	1.64627	0.017032	27.4379	0.283867
ArnA	137	144	IVIVPDSE	6	870.469	8.59146	0.015758	30	1.9484	0.0228	32.4734	0.38
ArnA	137	144	IVIVPDSE	6	870.469	8.61194	0.002935	100	2.30661	0.023074	38.4434	0.384567
ArnA	137	144	IVIVPDSE	6	870.469	8.5996	0.009266	1000	2.63459	0.026856	43.9098	0.4476
ArnA	137	144	IVIVPDSE	6	870.469	8.6011	0.004406	10000	2.8883	0.013139	48.1383	0.218983
ArnA/ArnB~P	137	144	IVIVPDSE	6	870.469	8.53116	0.013411	0	0	0	0	0
ArnA/ArnB~P	137	144	IVIVPDSE	6	870.469	8.57934	0.008808	10	1.00131	0.025503	16.6884	0.42505
ArnA/ArnB~P	137	144	IVIVPDSE	6	870.469	8.61286	0.00217	30	1.30048	0.024711	21.6746	0.41185
ArnA/ArnB~P	137	144	IVIVPDSE	6	870.469	8.59663	0.033003	100	1.92141	0.02431	32.0235	0.405167
ArnA/ArnB~P	137	144	IVIVPDSE	6	870.469	8.60591	0.006288	1000	2.61305	0.015784	43.5508	0.263067
ArnA/ArnB~P	137	144	IVIVPDSE	6	870.469	8.59889	0.010903	10000	2.60017	0.018469	43.3361	0.307817
ArnA	137	145	IVIVPDSEV	7	969.538	9.17084	0.002628	0	0	0	0	0
ArnA	137	145	IVIVPDSEV	7	969.538	9.16546	0.007938	10	1.93577	0.027067	27.6539	0.386671
ArnA	137	145	IVIVPDSEV	7	969.538	9.17597	0.009048	30	2.25822	0.01281	32.2603	0.183
ArnA	137	145	IVIVPDSEV	7	969.538	9.16705	0.001355	100	2.62291	0.021401	37.4701	0.305729
ArnA	137	145	IVIVPDSEV	7	969.538	9.17066	0.013266	1000	3.45364	0.104445	49.3377	1.49207
ArnA	137	145	IVIVPDSEV	7	969.538	9.15981	0.008429	10000	3.72084	0.103944	53.1549	1.48491
ArnA/ArnB~P	137	145	IVIVPDSEV	7	969.538	9.18984	0.005458	0	0	0	0	0
ArnA/ArnB~P	137	145	IVIVPDSEV	7	969.538	9.18695	0.003247	10	1.25022	0.006416	17.8603	0.0916571
ArnA/ArnB~P	137	145	IVIVPDSEV	7	969.538	9.18665	0.003135	30	1.7405	0.050133	24.8642	0.716186
ArnA/ArnB~P	137	145	IVIVPDSEV	7	969.538	9.17373	0.003864	100	2.17915	0.02703	31.1307	0.386143
ArnA/ArnB~P	137	145	IVIVPDSEV	7	969.538	9.1715	0.009915	1000	2.90174	0.063186	41.4534	0.902657
ArnA/ArnB~P	137	145	IVIVPDSEV	7	969.538	9.17523	0.007811	10000	3.40755	0.157411	48.6794	2.24873
ArnA	137	152	IVIVPDSEVSRKHAVI	14	1761.01	8.12111	0.004991	0	0	0	0	0
ArnA	137	152	IVIVPDSEVSRKHAVI	14	1761.01	8.10985	0.002569	10	2.72717	0.063243	19.4798	0.451736
ArnA	137	152	IVIVPDSEVSRKHAVI	14	1761.01	8.11649	0.00727	30	3.00995	0.083045	21.4996	0.593179
ArnA	137	152	IVIVPDSEVSRKHAVI	14	1761.01	8.10978	0.003176	100	3.62024	0.024897	25.8589	0.177836
ArnA	137	152	IVIVPDSEVSRKHAVI	14	1761.01	8.12306	0.002596	1000	4.80063	0.088812	34.2902	0.634371
ArnA	137	152	IVIVPDSEVSRKHAVI	14	1761.01	8.11275	0.011832	10000	5.07257	0.112589	36.2326	0.804207
ArnA/ArnB~P	137	152	IVIVPDSEVSRKHAVI	14	1761.01	8.13765	0.005449	0	0	0	0	0
ArnA/ArnB~P	137	152	IVIVPDSEVSRKHAVI	14	1761.01	8.1247	0.002331	10	1.85359	0.047071	13.2399	0.336221
ArnA/ArnB~P	137	152	IVIVPDSEVSRKHAVI	14	1761.01	8.13781	0.004288	30	2.37987	0.031089	16.999	0.222064
ArnA/ArnB~P	137	152	IVIVPDSEVSRKHAVI	14	1761.01	8.10282	0.005448	100	2.76064	0.037232	19.7189	0.265943
ArnA/ArnB~P	137	152	IVIVPDSEVSRKHAVI	14	1761.01	8.09749	0.015727	1000	3.67268	0.217214	26.2334	1.55153
ArnA/ArnB~P	137	152	IVIVPDSEVSRKHAVI	14	1761.01	8.09965	0.010445	10000	4.63468	0.240689	33.1049	1.71921
ArnA	137	154	IVIVPDSEVSRKHAVIYL	16	2037.16	9.04052	0.0067	0	0	0	0	0
ArnA	137	154	IVIVPDSEVSRKHAVIYL	16	2037.16	9.03972	0.012108	10	2.60709	0.064439	16.2943	0.402744
ArnA	137	154	IVIVPDSEVSRKHAVIYL	16	2037.16	9.04821	0.008494	30	2.91503	0.074197	18.2189	0.463731
ArnA	137	154	IVIVPDSEVSRKHAVIYL	16	2037.16	9.03644	0.001687	100	3.55089	0.014314	22.1931	0.0894625
ArnA	137	154	IVIVPDSEVSRKHAVIYL	16	2037.16	9.04561	0.016655	1000	4.74834	0.07614	29.6772	0.475875
ArnA	137	154	IVIVPDSEVSRKHAVIYL	16	2037.16	9.0234	0.014571	10000	5.33441	0.141455	33.34	0.884094
ArnA/ArnB~P	137	154	IVIVPDSEVSRKHAVIYL	16	2037.16	9.13047	0.007092	0	0	0	0	0
ArnA/ArnB~P	137	154	IVIVPDSEVSRKHAVIYL	16	2037.16	9.09778	0.003693	10	1.84277	0.031353	11.5173	0.195956
ArnA/ArnB~P	137	154	IVIVPDSEVSRKHAVIYL	16	2037.16	9.10255	0.005347	30	2.27497	0.016409	14.2186	0.102556
ArnA/ArnB~P	137	154	IVIVPDSEVSRKHAVIYL	16	2037.16	9.05383	0.009294	100	2.7168	0.021969	16.98	0.137306
ArnA/ArnB~P	137	154	IVIVPDSEVSRKHAVIYL	16	2037.16	9.04672	0.020059	1000	3.61471	0.153436	22.5919	0.958975
ArnA/ArnB~P	137	154	IVIVPDSEVSRKHAVIYL	16	2037.16	9.0466	0.01397	10000	4.9626	0.232493	31.0162	1.45308
ArnA	137	158	IVIVPDSEVSRKHAVIYLDNSE	20	2482.31	8.56458	0.005162	0	0	0	0	0
ArnA	137	158	IVIVPDSEVSRKHAVIYLDNSE	20	2482.31	8.54857	0.006	10	4.41671	0.061994	22.0836	0.30997
ArnA	137	158	IVIVPDSEVSRKHAVIYLDNSE	20	2482.31	8.55823	0.007704	30	4.83117	0.144115	24.1559	0.720575
ArnA	137	158	IVIVPDSEVSRKHAVIYLDNSE	20	2482.31	8.55066	0.002463	100	5.56149	0.033797	27.8075	0.168985
ArnA	137	158	IVIVPDSEVSRKHAVIYLDNSE	20	2482.31	8.56076	0.008575	1000	7.15576	0.101117	35.7788	0.505585
ArnA	137	158	IVIVPDSEVSRKHAVIYLDNSE	20	2482.31	8.55062	0.00823	10000	7.89022	0.205108	39.4511	1.02554
ArnA/ArnB~P	137	158	IVIVPDSEVSRKHAVIYLDNSE	20	2482.31	8.59585	0.008573	0	0	0	0	0
ArnA/ArnB~P	137	158	IVIVPDSEVSRKHAVIYLDNSE	20	2482.31	8.57229	0.00196	10	3.58867	0.059243	17.9433	0.296215
ArnA/ArnB~P	137	158	IVIVPDSEVSRKHAVIYLDNSE	20	2482.31	8.57562	0.006311	30	4.42188	0.006787	22.1094	0.033935
ArnA/ArnB~P	137	158	IVIVPDSEVSRKHAVIYLDNSE	20	2482.31	8.54423	0.008472	100	4.70837	0.039797	23.5418	0.198985
ArnA/ArnB~P	137	158	IVIVPDSEVSRKHAVIYLDNSE	20	2482.31	8.53609	0.013349	1000	5.96447	0.188806	29.8223	0.94403
ArnA/ArnB~P	137	158	IVIVPDSEVSRKHAVIYLDNSE	20	2482.31	8.54002	0.005415	10000	7.46868	0.376897	37.3434	1.88448
ArnA	137	159	IVIVPDSEVSRKHAVIYLDNSEL	21	2595.39	9.1299	0.0117	0	0	0	0	0
ArnA	137	159	IVIVPDSEVSRKHAVIYLDNSEL	21	2595.39	9.11841	0.004923	10	4.82706	0.063438	22.986	0.302086
ArnA	137	159	IVIVPDSEVSRKHAVIYLDNSEL	21	2595.39	9.12501	0.015408	30	5.41562	0.167016	25.7887	0.795314
ArnA	137	159	IVIVPDSEVSRKHAVIYLDNSEL	21	2595.39	9.10928	0.005407	100	6.06401	0.019055	28.8763	0.0907381
ArnA	137	159	IVIVPDSEVSRKHAVIYLDNSEL	21	2595.39	9.11715	0.015259	1000	7.55188	0.148715	35.9613	0.708167
ArnA	137	159	IVIVPDSEVSRKHAVIYLDNSEL	21	2595.39	9.10511	0.002404	10000	8.2466	0.258157	39.2695	1.22932
ArnA/ArnB~P	137	159	IVIVPDSEVSRKHAVIYLDNSEL	21	2595.39	9.16118	0.016565	0	0	0	0	0
ArnA/ArnB~P	137	159	IVIVPDSEVSRKHAVIYLDNSEL	21	2595.39	9.14058	0.001501	10	4.05476	0.029123	19.3084	0.138681
ArnA/ArnB~P	137	159	IVIVPDSEVSRKHAVIYLDNSEL	21	2595.39	9.12843	0.005811	30	5.00836	0.061004	23.8494	0.290495
ArnA/ArnB~P	137	159	IVIVPDSEVSRKHAVIYLDNSEL	21	2595.39	9.11143	0.008483	100	5.23287	0.046817	24.9184	0.222938
ArnA/ArnB~P	137	159	IVIVPDSEVSRKHAVIYLDNSEL	21	2595.39	9.09773	0.013137	1000	6.50253	0.307157	30.9644	1.46265
ArnA/ArnB~P	137	159	IVIVPDSEVSRKHAVIYLDNSEL	21	2595.39	9.09355	0.007326	10000	7.9619	0.369182	37.9138	1.75801
ArnA	138	153	VIVPDSEVSRKHAVIY	14	1810.99	8.33292	0.020622	0	0	0	0	0
ArnA	138	153	VIVPDSEVSRKHAVIY	14	1810.99	8.34617	0.015053	10	2.59899	0.048884	18.5642	0.349171
ArnA	138	153	VIVPDSEVSRKHAVIY	14	1810.99	8.37302	0.029883	30	3.01381	0.040194	21.5272	0.2871
ArnA	138	153	VIVPDSEVSRKHAVIY	14	1810.99	8.40553	0.006557	100	3.5538	0.074626	25.3843	0.533043
ArnA	138	153	VIVPDSEVSRKHAVIY	14	1810.99	8.38237	0.014505	1000	4.71717	0.025818	33.694	0.184414
ArnA	138	153	VIVPDSEVSRKHAVIY	14	1810.99	8.39416	0.012444	10000	4.95466	0.012902	35.3904	0.0921571
ArnA/ArnB~P	138	153	VIVPDSEVSRKHAVIY	14	1810.99	8.28478	0.009898	0	0	0	0	0
ArnA/ArnB~P	138	153	VIVPDSEVSRKHAVIY	14	1810.99	8.31699	0.009905	10	1.67963	0.025806	11.9974	0.184329
ArnA/ArnB~P	138	153	VIVPDSEVSRKHAVIY	14	1810.99	8.34878	0.002268	30	1.96284	0.024901	14.0203	0.177864
ArnA/ArnB~P	138	153	VIVPDSEVSRKHAVIY	14	1810.99	8.32584	0.032942	100	2.52653	0.052183	18.0467	0.372736
ArnA/ArnB~P	138	153	VIVPDSEVSRKHAVIY	14	1810.99	8.33269	0.007467	1000	3.28022	0.022254	23.4302	0.158957
ArnA/ArnB~P	138	153	VIVPDSEVSRKHAVIY	14	1810.99	8.33364	0.021067	10000	4.0762	0.068311	29.1157	0.487936
ArnA	139	153	IVPDSEVSRKHAVIY	13	1711.93	8.33414	0.024535	0	0	0	0	0
ArnA	139	153	IVPDSEVSRKHAVIY	13	1711.93	8.33966	0.012239	10	2.65711	0.044022	20.4393	0.338631
ArnA	139	153	IVPDSEVSRKHAVIY	13	1711.93	8.37096	0.028776	30	2.98864	0.038685	22.9896	0.297577
ArnA	139	153	IVPDSEVSRKHAVIY	13	1711.93	8.40643	0.004615	100	3.61645	0.037103	27.8189	0.285408
ArnA	139	153	IVPDSEVSRKHAVIY	13	1711.93	8.38314	0.012163	1000	4.75347	0.010809	36.5652	0.0831462
ArnA	139	153	IVPDSEVSRKHAVIY	13	1711.93	8.39123	0.01087	10000	5.01715	0.058854	38.5935	0.452723
ArnA/ArnB~P	139	153	IVPDSEVSRKHAVIY	13	1711.93	8.27716	0.009337	0	0	0	0	0
ArnA/ArnB~P	139	153	IVPDSEVSRKHAVIY	13	1711.93	8.30784	0.009886	10	1.66012	0.017946	12.7702	0.138046
ArnA/ArnB~P	139	153	IVPDSEVSRKHAVIY	13	1711.93	8.34199	0.001666	30	1.976	0.027988	15.2	0.215292
ArnA/ArnB~P	139	153	IVPDSEVSRKHAVIY	13	1711.93	8.31422	0.033692	100	2.57251	0.031371	19.7885	0.241315
ArnA/ArnB~P	139	153	IVPDSEVSRKHAVIY	13	1711.93	8.32824	0.00613	1000	3.35417	0.015006	25.8013	0.115431
ArnA/ArnB~P	139	153	IVPDSEVSRKHAVIY	13	1711.93	8.32999	0.01886	10000	4.13262	0.020634	31.7894	0.158723
ArnA	140	153	VPDSEVSRKHAVIY	12	1598.84	8.28897	0.007659	0	0	0	0	0
ArnA	140	153	VPDSEVSRKHAVIY	12	1598.84	8.28004	0.004057	10	2.66551	0.110652	22.2126	0.9221
ArnA	140	153	VPDSEVSRKHAVIY	12	1598.84	8.28969	0.004436	30	2.95551	0.055168	24.6292	0.459733
ArnA	140	153	VPDSEVSRKHAVIY	12	1598.84	8.28159	0.002179	100	3.43998	0.036836	28.6665	0.306967
ArnA	140	153	VPDSEVSRKHAVIY	12	1598.84	8.2977	0.00638	1000	4.48194	0.023324	37.3495	0.194367
ArnA	140	153	VPDSEVSRKHAVIY	12	1598.84	8.28901	0.011074	10000	4.69664	0.135383	39.1387	1.12819
ArnA/ArnB~P	140	153	VPDSEVSRKHAVIY	12	1598.84	8.32584	0.005895	0	0	0	0	0
ArnA/ArnB~P	140	153	VPDSEVSRKHAVIY	12	1598.84	8.3142	0.002631	10	1.75698	0.050808	14.6415	0.4234
ArnA/ArnB~P	140	153	VPDSEVSRKHAVIY	12	1598.84	8.31437	0.005831	30	2.33458	0.030535	19.4548	0.254458
ArnA/ArnB~P	140	153	VPDSEVSRKHAVIY	12	1598.84	8.27716	0.006352	100	2.59112	0.026705	21.5927	0.222542
ArnA/ArnB~P	140	153	VPDSEVSRKHAVIY	12	1598.84	8.26742	0.01109	1000	3.34836	0.110226	27.903	0.91855
ArnA/ArnB~P	140	153	VPDSEVSRKHAVIY	12	1598.84	8.2754	0.00667	10000	4.26419	0.203635	35.5349	1.69696
ArnA	141	153	PDSEVSRKHAVIY	11	1499.77	8.2881	0.004368	0	0	0	0	0
ArnA	141	153	PDSEVSRKHAVIY	11	1499.77	8.27966	0.003009	10	2.44365	0.071478	22.215	0.6498
ArnA	141	153	PDSEVSRKHAVIY	11	1499.77	8.28702	0.004834	30	2.78768	0.096856	25.3426	0.880509
ArnA	141	153	PDSEVSRKHAVIY	11	1499.77	8.27985	0.003248	100	3.10418	0.012043	28.2199	0.109482
ArnA	141	153	PDSEVSRKHAVIY	11	1499.77	8.2967	0.00697	1000	4.03316	0.078323	36.6651	0.712027
ArnA	141	153	PDSEVSRKHAVIY	11	1499.77	8.28646	0.012122	10000	4.18109	0.140267	38.0099	1.27515
ArnA/ArnB~P	141	153	PDSEVSRKHAVIY	11	1499.77	8.32138	0.005905	0	0	0	0	0
ArnA/ArnB~P	141	153	PDSEVSRKHAVIY	11	1499.77	8.30826	0.002407	10	1.5629	0.017061	14.2081	0.1551
ArnA/ArnB~P	141	153	PDSEVSRKHAVIY	11	1499.77	8.31362	0.005259	30	1.94871	0.021222	17.7155	0.192927
ArnA/ArnB~P	141	153	PDSEVSRKHAVIY	11	1499.77	8.27438	0.006131	100	2.42169	0.035038	22.0154	0.318527
ArnA/ArnB~P	141	153	PDSEVSRKHAVIY	11	1499.77	8.26901	0.014733	1000	3.06865	0.061743	27.8968	0.5613
ArnA/ArnB~P	141	153	PDSEVSRKHAVIY	11	1499.77	8.27139	0.009332	10000	4.01931	0.140413	36.5392	1.27648
ArnA	141	154	PDSEVSRKHAVIYL	12	1612.86	9.03854	0.003408	0	0	0	0	0
ArnA	141	154	PDSEVSRKHAVIYL	12	1612.86	9.02717	0.017032	10	2.52205	0.039448	21.0171	0.328733
ArnA	141	154	PDSEVSRKHAVIYL	12	1612.86	9.04226	0.00865	30	2.77651	0.040459	23.1376	0.337158
ArnA	141	154	PDSEVSRKHAVIYL	12	1612.86	9.03147	0.002059	100	3.26159	0.020631	27.18	0.171925
ArnA	141	154	PDSEVSRKHAVIYL	12	1612.86	9.03851	0.014778	1000	4.34058	0.052882	36.1715	0.440683
ArnA	141	154	PDSEVSRKHAVIYL	12	1612.86	9.01775	0.016326	10000	4.76356	0.076334	39.6963	0.636117
ArnA/ArnB~P	141	154	PDSEVSRKHAVIYL	12	1612.86	9.10158	0.005072	0	0	0	0	0
ArnA/ArnB~P	141	154	PDSEVSRKHAVIYL	12	1612.86	9.07658	0.00437	10	1.71284	0.030421	14.2737	0.253508
ArnA/ArnB~P	141	154	PDSEVSRKHAVIYL	12	1612.86	9.08713	0.005745	30	2.1966	0.055181	18.305	0.459842
ArnA/ArnB~P	141	154	PDSEVSRKHAVIYL	12	1612.86	9.0373	0.006702	100	2.49579	0.034181	20.7982	0.284842
ArnA/ArnB~P	141	154	PDSEVSRKHAVIYL	12	1612.86	9.03061	0.015426	1000	3.22572	0.114916	26.881	0.957633
ArnA/ArnB~P	141	154	PDSEVSRKHAVIYL	12	1612.86	9.03211	0.015579	10000	4.40537	0.203292	36.7114	1.6941
ArnA	142	153	DSEVSRKHAVIY	11	1402.72	8.2893	0.007528	0	0	0	0	0
ArnA	142	153	DSEVSRKHAVIY	11	1402.72	8.28027	0.004968	10	2.61898	0.07402	23.8089	0.672909
ArnA	142	153	DSEVSRKHAVIY	11	1402.72	8.28813	0.003331	30	2.83745	0.083682	25.795	0.760745
ArnA	142	153	DSEVSRKHAVIY	11	1402.72	8.27848	0.00421	100	3.17927	0.033892	28.9025	0.308109
ArnA	142	153	DSEVSRKHAVIY	11	1402.72	8.29578	0.007132	1000	4.08588	0.066747	37.1444	0.606791
ArnA	142	153	DSEVSRKHAVIY	11	1402.72	8.28661	0.01255	10000	4.17636	0.138021	37.9669	1.25474
ArnA/ArnB~P	142	153	DSEVSRKHAVIY	11	1402.72	8.32613	0.007224	0	0	0	0	0
ArnA/ArnB~P	142	153	DSEVSRKHAVIY	11	1402.72	8.32259	0.003058	10	1.72138	0.038443	15.6489	0.349482
ArnA/ArnB~P	142	153	DSEVSRKHAVIY	11	1402.72	8.31565	0.005519	30	2.22639	0.044117	20.2399	0.401064
ArnA/ArnB~P	142	153	DSEVSRKHAVIY	11	1402.72	8.28615	0.008043	100	2.34931	0.025938	21.3573	0.2358
ArnA/ArnB~P	142	153	DSEVSRKHAVIY	11	1402.72	8.27571	0.013604	1000	2.977	0.19239	27.0636	1.749
ArnA/ArnB~P	142	153	DSEVSRKHAVIY	11	1402.72	8.27581	0.008861	10000	3.98474	0.221181	36.2249	2.01074
ArnA	154	159	LDNSEL	5	689.323	8.25578	0.026123	0	0	0	0	0
ArnA	154	159	LDNSEL	5	689.323	8.25183	0.01078	10	2.2176	0.014664	44.3519	0.29328
ArnA	154	159	LDNSEL	5	689.323	8.27317	0.021321	30	2.3987	0.028694	47.974	0.57388
ArnA	154	159	LDNSEL	5	689.323	8.2901	0.001797	100	2.40628	0.006739	48.1256	0.13478
ArnA	154	159	LDNSEL	5	689.323	8.27774	0.008781	1000	2.38441	0.006596	47.6881	0.13192
ArnA	154	159	LDNSEL	5	689.323	8.27888	0.007638	10000	2.36074	0.01258	47.2147	0.2516
ArnA/ArnB~P	154	159	LDNSEL	5	689.323	8.17313	0.008827	0	0	0	0	0
ArnA/ArnB~P	154	159	LDNSEL	5	689.323	8.22367	0.017343	10	2.15514	0.006054	43.1027	0.12108
ArnA/ArnB~P	154	159	LDNSEL	5	689.323	8.26438	0.003862	30	2.3045	0.035247	46.09	0.70494
ArnA/ArnB~P	154	159	LDNSEL	5	689.323	8.25471	0.030843	100	2.34159	0.0088	46.8318	0.176
ArnA/ArnB~P	154	159	LDNSEL	5	689.323	8.25063	0.008775	1000	2.35246	0.002039	47.0493	0.04078
ArnA/ArnB~P	154	159	LDNSEL	5	689.323	8.25884	0.018793	10000	2.33386	0.00757	46.6771	0.1514
ArnA	154	160	LDNSELY	6	852.386	8.88525	0.015781	0	0	0	0	0
ArnA	154	160	LDNSELY	6	852.386	8.87211	0.014597	10	2.15343	0.012562	35.8905	0.209367
ArnA	154	160	LDNSELY	6	852.386	8.89086	0.012105	30	2.32963	0.016793	38.8271	0.279883
ArnA	154	160	LDNSELY	6	852.386	8.90816	0.004597	100	2.34438	0.015942	39.073	0.2657
ArnA	154	160	LDNSELY	6	852.386	8.89651	0.017097	1000	2.34545	0.009402	39.0908	0.1567
ArnA	154	160	LDNSELY	6	852.386	8.89941	0.00515	10000	2.31051	0.007191	38.5085	0.11985
ArnA/ArnB~P	154	160	LDNSELY	6	852.386	8.81894	0.012153	0	0	0	0	0
ArnA/ArnB~P	154	160	LDNSELY	6	852.386	8.86286	0.006627	10	2.11344	0.02717	35.224	0.452833
ArnA/ArnB~P	154	160	LDNSELY	6	852.386	8.90209	0.004486	30	2.28326	0.044875	38.0543	0.747917
ArnA/ArnB~P	154	160	LDNSELY	6	852.386	8.87774	0.036147	100	2.32663	0.026369	38.7772	0.439483
ArnA/ArnB~P	154	160	LDNSELY	6	852.386	8.89344	0.008053	1000	2.30036	0.026299	38.3394	0.438317
ArnA/ArnB~P	154	160	LDNSELY	6	852.386	8.89002	0.005764	10000	2.27712	0.026386	37.9521	0.439767
ArnA	157	160	SELY	3	510.232	8.49081	0.02434	0	0	0	0	0
ArnA	157	160	SELY	3	510.232	8.48811	0.011156	10	0.640566	0.020804	21.3522	0.693467
ArnA	157	160	SELY	3	510.232	8.50713	0.018352	30	0.683707	0.020716	22.7902	0.690533
ArnA	157	160	SELY	3	510.232	8.52875	0.002037	100	0.674824	0.020002	22.4941	0.666733
ArnA	157	160	SELY	3	510.232	8.51998	0.010361	1000	0.666743	0.020392	22.2248	0.679733
ArnA	157	160	SELY	3	510.232	8.5171	0.007484	10000	0.65334	0.020819	21.778	0.693967
ArnA/ArnB~P	157	160	SELY	3	510.232	8.41834	0.008622	0	0	0	0	0
ArnA/ArnB~P	157	160	SELY	3	510.232	8.4658	0.013495	10	0.679399	0.008224	22.6466	0.274133
ArnA/ArnB~P	157	160	SELY	3	510.232	8.50901	0.002765	30	0.701471	0.011122	23.3824	0.370733
ArnA/ArnB~P	157	160	SELY	3	510.232	8.49176	0.031983	100	0.68766	0.001873	22.922	0.0624333
ArnA/ArnB~P	157	160	SELY	3	510.232	8.49257	0.008424	1000	0.692213	0.003717	23.0738	0.1239
ArnA/ArnB~P	157	160	SELY	3	510.232	8.49857	0.015823	10000	0.683045	0.002095	22.7682	0.0698333
ArnA	157	162	SELYIE	5	752.359	9.17693	0.017527	0	0	0	0	0
ArnA	157	162	SELYIE	5	752.359	9.16532	0.015444	10	0.818047	0.011997	16.3609	0.23994
ArnA	157	162	SELYIE	5	752.359	9.19487	0.00241	30	0.862755	0.004283	17.2551	0.08566
ArnA	157	162	SELYIE	5	752.359	9.20246	0.006843	100	0.83889	0.006229	16.7778	0.12458
ArnA	157	162	SELYIE	5	752.359	9.18964	0.014306	1000	0.82556	0.013267	16.5112	0.26534
ArnA	157	162	SELYIE	5	752.359	9.19426	0.009296	10000	0.819223	0.005629	16.3845	0.11258
ArnA/ArnB~P	157	162	SELYIE	5	752.359	9.12133	0.008909	0	0	0	0	0
ArnA/ArnB~P	157	162	SELYIE	5	752.359	9.15934	0.006805	10	0.853433	0.010995	17.0687	0.2199
ArnA/ArnB~P	157	162	SELYIE	5	752.359	9.19758	0.004928	30	0.869133	0.018531	17.3827	0.37062
ArnA/ArnB~P	157	162	SELYIE	5	752.359	9.17201	0.034345	100	0.846035	0.014417	16.9207	0.28834
ArnA/ArnB~P	157	162	SELYIE	5	752.359	9.19345	0.008668	1000	0.851748	0.007047	17.035	0.14094
ArnA/ArnB~P	157	162	SELYIE	5	752.359	9.1839	0.007358	10000	0.843474	0.007562	16.8695	0.15124
ArnA	159	163	LYIED	4	651.311	8.75748	0.020532	0	0	0	0	0
ArnA	159	163	LYIED	4	651.311	8.74616	0.012327	10	0.030816	0.007273	0.7704	0.181825
ArnA	159	163	LYIED	4	651.311	8.7637	0.0171	30	0.035249	0.009657	0.881225	0.241425
ArnA	159	163	LYIED	4	651.311	8.78735	0.004516	100	0.12414	0.012335	3.1035	0.308375
ArnA	159	163	LYIED	4	651.311	8.77131	0.013888	1000	0.445788	0.006018	11.1447	0.15045
ArnA	159	163	LYIED	4	651.311	8.77399	0.00806	10000	0.458188	0.00994	11.4547	0.2485
ArnA/ArnB~P	159	163	LYIED	4	651.311	8.68987	0.013092	0	0	0	0	0
ArnA/ArnB~P	159	163	LYIED	4	651.311	8.73594	0.007437	10	0.067563	0.010061	1.68907	0.251525
ArnA/ArnB~P	159	163	LYIED	4	651.311	8.77752	0.003088	30	0.079374	0.011329	1.98435	0.283225
ArnA/ArnB~P	159	163	LYIED	4	651.311	8.75528	0.034069	100	0.140389	0.015045	3.50973	0.376125
ArnA/ArnB~P	159	163	LYIED	4	651.311	8.76377	0.007613	1000	0.434581	0.008159	10.8645	0.203975
ArnA/ArnB~P	159	163	LYIED	4	651.311	8.76118	0.010164	10000	0.445767	0.010344	11.1442	0.2586
ArnA	159	164	LYIEDL	5	764.395	10.2616	0.003714	0	0	0	0	0
ArnA	159	164	LYIEDL	5	764.395	10.2552	0.022223	10	0.178415	0.010651	3.5683	0.21302
ArnA	159	164	LYIEDL	5	764.395	10.2848	0.009656	30	0.262346	0.013228	5.24692	0.26456
ArnA	159	164	LYIEDL	5	764.395	10.2882	0.01335	100	0.585817	0.030686	11.7163	0.61372
ArnA	159	164	LYIEDL	5	764.395	10.2623	0.022096	1000	1.28144	0.005888	25.6287	0.11776
ArnA	159	164	LYIEDL	5	764.395	10.2937	0.012615	10000	1.28461	0.010513	25.6921	0.21026
ArnA/ArnB~P	159	164	LYIEDL	5	764.395	10.2189	0.014476	0	0	0	0	0
ArnA/ArnB~P	159	164	LYIEDL	5	764.395	10.2503	0.015441	10	0.224685	0.010979	4.4937	0.21958
ArnA/ArnB~P	159	164	LYIEDL	5	764.395	10.2576	0.026853	30	0.315815	0.013768	6.3163	0.27536
ArnA/ArnB~P	159	164	LYIEDL	5	764.395	10.2474	0.011589	100	0.642056	0.033288	12.8411	0.66576
ArnA/ArnB~P	159	164	LYIEDL	5	764.395	10.277	0.006962	1000	1.30319	0.014226	26.0638	0.28452
ArnA/ArnB~P	159	164	LYIEDL	5	764.395	10.2721	0.021246	10000	1.31428	0.012452	26.2857	0.24904
ArnA	160	163	YIED	3	538.227	7.28035	0.019139	0	0	0	0	0
ArnA	160	163	YIED	3	538.227	7.29064	0.00547	10	0.040485	0.009201	1.3495	0.3067
ArnA	160	163	YIED	3	538.227	7.32932	0.019368	30	0.058424	0.005886	1.94747	0.1962
ArnA	160	163	YIED	3	538.227	7.32349	0.007371	100	0.140916	0.017894	4.6972	0.596467
ArnA	160	163	YIED	3	538.227	7.32377	0.004193	1000	0.51474	0.007426	17.158	0.247533
ArnA	160	163	YIED	3	538.227	7.29846	0.000536	10000	0.515064	0.007518	17.1688	0.2506
ArnA/ArnB~P	160	163	YIED	3	538.227	7.16337	0.011064	0	0	0	0	0
ArnA/ArnB~P	160	163	YIED	3	538.227	7.22736	0.02341	10	0.071835	0.008072	2.3945	0.269067
ArnA/ArnB~P	160	163	YIED	3	538.227	7.26682	0.011591	30	0.086963	0.008351	2.89877	0.278367
ArnA/ArnB~P	160	163	YIED	3	538.227	7.25792	0.019375	100	0.155139	0.008515	5.1713	0.283833
ArnA/ArnB~P	160	163	YIED	3	538.227	7.22472	0.006509	1000	0.495162	0.010699	16.5054	0.356633
ArnA/ArnB~P	160	163	YIED	3	538.227	7.30281	0.021135	10000	0.50755	0.010034	16.9183	0.334467
ArnA	160	164	YIEDL	4	651.311	9.36196	0.017104	0	0	0	0	0
ArnA	160	164	YIEDL	4	651.311	9.3632	0.013038	10	0.12241	0.014121	3.06025	0.353025
ArnA	160	164	YIEDL	4	651.311	9.3876	0.003008	30	0.206107	0.009032	5.15268	0.2258
ArnA	160	164	YIEDL	4	651.311	9.39221	0.006546	100	0.491373	0.011808	12.2843	0.2952
ArnA	160	164	YIEDL	4	651.311	9.38107	0.013389	1000	1.11348	0.012542	27.8371	0.31355
ArnA	160	164	YIEDL	4	651.311	9.38676	0.007671	10000	1.10569	0.010186	27.6423	0.25465
ArnA/ArnB~P	160	164	YIEDL	4	651.311	9.30073	0.007953	0	0	0	0	0
ArnA/ArnB~P	160	164	YIEDL	4	651.311	9.34299	0.010204	10	0.152568	0.012967	3.8142	0.324175
ArnA/ArnB~P	160	164	YIEDL	4	651.311	9.37321	0.007779	30	0.242147	0.011302	6.05368	0.28255
ArnA/ArnB~P	160	164	YIEDL	4	651.311	9.35491	0.031388	100	0.517637	0.017699	12.9409	0.442475
ArnA/ArnB~P	160	164	YIEDL	4	651.311	9.37274	0.007439	1000	1.12051	0.012319	28.0128	0.307975
ArnA/ArnB~P	160	164	YIEDL	4	651.311	9.36316	0.00669	10000	1.12607	0.011245	28.1517	0.281125
ArnA	164	173	LNSTNGTYVY	9	1130.52	8.70438	0.025181	0	0	0	0	0
ArnA	164	173	LNSTNGTYVY	9	1130.52	8.70358	0.007713	10	2.25996	0.023601	25.1107	0.262233
ArnA	164	173	LNSTNGTYVY	9	1130.52	8.71792	0.014431	30	2.51819	0.026671	27.9799	0.296344
ArnA	164	173	LNSTNGTYVY	9	1130.52	8.73627	0.002672	100	2.98089	0.03985	33.121	0.442778
ArnA	164	173	LNSTNGTYVY	9	1130.52	8.72325	0.012104	1000	3.64245	0.017864	40.4716	0.198489
ArnA	164	173	LNSTNGTYVY	9	1130.52	8.72533	0.005494	10000	3.8104	0.013848	42.3377	0.153867
ArnA/ArnB~P	164	173	LNSTNGTYVY	9	1130.52	8.64578	0.013597	0	0	0	0	0
ArnA/ArnB~P	164	173	LNSTNGTYVY	9	1130.52	8.70339	0.00681	10	1.14829	0.020372	12.7588	0.226356
ArnA/ArnB~P	164	173	LNSTNGTYVY	9	1130.52	8.73589	0.003776	30	1.63156	0.020652	18.1285	0.229467
ArnA/ArnB~P	164	173	LNSTNGTYVY	9	1130.52	8.71536	0.028911	100	2.24863	0.016851	24.9848	0.187233
ArnA/ArnB~P	164	173	LNSTNGTYVY	9	1130.52	8.72603	0.008474	1000	3.09789	0.018018	34.421	0.2002
ArnA/ArnB~P	164	173	LNSTNGTYVY	9	1130.52	8.72081	0.007897	10000	3.83388	0.0146	42.5987	0.162222
ArnA	164	186	LNSTNGTYVYDGKQFTPIKGKQK	21	2586.34	7.65911	0.026298	0	0	0	0	0
ArnA	164	186	LNSTNGTYVYDGKQFTPIKGKQK	21	2586.34	7.669	0.004173	10	7.46497	0.017647	35.5475	0.0840333
ArnA	164	186	LNSTNGTYVYDGKQFTPIKGKQK	21	2586.34	7.69666	0.024901	30	7.90029	0.031652	37.6204	0.150724
ArnA	164	186	LNSTNGTYVYDGKQFTPIKGKQK	21	2586.34	7.72055	0.002519	100	8.29443	0.08391	39.4973	0.399571
ArnA	164	186	LNSTNGTYVYDGKQFTPIKGKQK	21	2586.34	7.70611	0.008316	1000	9.75751	0.026904	46.4643	0.128114
ArnA	164	186	LNSTNGTYVYDGKQFTPIKGKQK	21	2586.34	7.71073	0.010344	10000	10.8957	0.072878	51.8843	0.347038
ArnA/ArnB~P	164	186	LNSTNGTYVYDGKQFTPIKGKQK	21	2586.34	7.5899	0.007514	0	0	0	0	0
ArnA/ArnB~P	164	186	LNSTNGTYVYDGKQFTPIKGKQK	21	2586.34	7.62918	0.020377	10	6.49228	0.017455	30.9156	0.083119
ArnA/ArnB~P	164	186	LNSTNGTYVYDGKQFTPIKGKQK	21	2586.34	7.66389	0.007067	30	7.02345	0.055794	33.445	0.265686
ArnA/ArnB~P	164	186	LNSTNGTYVYDGKQFTPIKGKQK	21	2586.34	7.65059	0.030944	100	7.50845	0.015469	35.7545	0.0736619
ArnA/ArnB~P	164	186	LNSTNGTYVYDGKQFTPIKGKQK	21	2586.34	7.64156	0.010287	1000	9.09074	0.061354	43.2893	0.292162
ArnA/ArnB~P	164	186	LNSTNGTYVYDGKQFTPIKGKQK	21	2586.34	7.65244	0.01738	10000	10.7194	0.013991	51.0446	0.0666238
ArnA	165	171	NSTNGTY	6	755.308	6.69901	0.006785	0	0	0	0	0
ArnA	165	171	NSTNGTY	6	755.308	6.64294	0.012919	10	1.57099	0.018087	26.1832	0.30145
ArnA	165	171	NSTNGTY	6	755.308	6.64866	0.019087	30	1.80868	0.012727	30.1446	0.212117
ArnA	165	171	NSTNGTY	6	755.308	6.62622	0.012954	100	2.21398	0.022488	36.8997	0.3748
ArnA	165	171	NSTNGTY	6	755.308	6.63799	0.00444	1000	2.35813	0.040178	39.3023	0.669633
ArnA	165	171	NSTNGTY	6	755.308	6.62125	0.020502	10000	2.35812	0.047226	39.302	0.7871
ArnA/ArnB~P	165	171	NSTNGTY	6	755.308	6.78936	0.007674	0	0	0	0	0
ArnA/ArnB~P	165	171	NSTNGTY	6	755.308	6.78834	0.000781	10	0.915065	0.008999	15.2511	0.149983
ArnA/ArnB~P	165	171	NSTNGTY	6	755.308	6.77761	0.005198	30	1.30419	0.01853	21.7365	0.308833
ArnA/ArnB~P	165	171	NSTNGTY	6	755.308	6.74807	0.002726	100	1.68264	0.008492	28.0441	0.141533
ArnA/ArnB~P	165	171	NSTNGTY	6	755.308	6.72202	0.01053	1000	2.11271	0.062289	35.2118	1.03815
ArnA/ArnB~P	165	171	NSTNGTY	6	755.308	6.70716	0.016987	10000	2.44996	0.073493	40.8326	1.22488
ArnA	165	173	NSTNGTYVY	8	1017.44	8.51458	0.030024	0	0	0	0	0
ArnA	165	173	NSTNGTYVY	8	1017.44	8.50576	0.012195	10	1.69936	0.042664	21.242	0.5333
ArnA	165	173	NSTNGTYVY	8	1017.44	8.52515	0.020266	30	1.95245	0.020043	24.4056	0.250537
ArnA	165	173	NSTNGTYVY	8	1017.44	8.54694	0.00171	100	2.44381	0.037454	30.5477	0.468175
ArnA	165	173	NSTNGTYVY	8	1017.44	8.5324	0.010057	1000	3.10094	0.025633	38.7618	0.320412
ArnA	165	173	NSTNGTYVY	8	1017.44	8.53353	0.005641	10000	3.30148	0.011912	41.2685	0.1489
ArnA/ArnB~P	165	173	NSTNGTYVY	8	1017.44	8.45098	0.0113	0	0	0	0	0
ArnA/ArnB~P	165	173	NSTNGTYVY	8	1017.44	8.49906	0.012328	10	0.938417	0.028628	11.7302	0.35785
ArnA/ArnB~P	165	173	NSTNGTYVY	8	1017.44	8.54137	0.003775	30	1.29713	0.033385	16.2142	0.417312
ArnA/ArnB~P	165	173	NSTNGTYVY	8	1017.44	8.52135	0.031931	100	1.7932	0.027953	22.4151	0.349412
ArnA/ArnB~P	165	173	NSTNGTYVY	8	1017.44	8.52713	0.006971	1000	2.58631	0.051815	32.3289	0.647687
ArnA/ArnB~P	165	173	NSTNGTYVY	8	1017.44	8.52383	0.017442	10000	3.33202	0.027204	41.6503	0.34005
ArnA	165	177	NSTNGTYVYDGKQ	12	1445.64	7.32444	0.004762	0	0	0	0	0
ArnA	165	177	NSTNGTYVYDGKQ	12	1445.64	7.28811	0.001845	10	4.44698	0.064322	37.0582	0.536017
ArnA	165	177	NSTNGTYVYDGKQ	12	1445.64	7.28934	0.006161	30	4.6564	0.104547	38.8033	0.871225
ArnA	165	177	NSTNGTYVYDGKQ	12	1445.64	7.26111	0.010525	100	5.05429	0.033845	42.1191	0.282042
ArnA	165	177	NSTNGTYVYDGKQ	12	1445.64	7.27066	0.001549	1000	5.7394	0.075135	47.8283	0.626125
ArnA	165	177	NSTNGTYVYDGKQ	12	1445.64	7.25991	0.019819	10000	5.82833	0.129462	48.5694	1.07885
ArnA/ArnB~P	165	177	NSTNGTYVYDGKQ	12	1445.64	7.34682	0.009561	0	0	0	0	0
ArnA/ArnB~P	165	177	NSTNGTYVYDGKQ	12	1445.64	7.34839	0.003385	10	3.46515	0.029135	28.8762	0.242792
ArnA/ArnB~P	165	177	NSTNGTYVYDGKQ	12	1445.64	7.35522	0.005494	30	4.22146	0.033313	35.1789	0.277608
ArnA/ArnB~P	165	177	NSTNGTYVYDGKQ	12	1445.64	7.32704	0.004147	100	4.37513	0.020493	36.4594	0.170775
ArnA/ArnB~P	165	177	NSTNGTYVYDGKQ	12	1445.64	7.31102	0.011638	1000	5.30386	0.181696	44.1988	1.51413
ArnA/ArnB~P	165	177	NSTNGTYVYDGKQ	12	1445.64	7.30886	0.011201	10000	6.00444	0.148517	50.037	1.23764
ArnA	167	173	TNGTYVY	6	816.365	8.57269	0.023614	0	0	0	0	0
ArnA	167	173	TNGTYVY	6	816.365	8.55797	0.011174	10	0.431604	0.011478	7.1934	0.1913
ArnA	167	173	TNGTYVY	6	816.365	8.57618	0.01653	30	0.647986	0.014206	10.7998	0.236767
ArnA	167	173	TNGTYVY	6	816.365	8.5997	0.002545	100	1.11287	0.027666	18.5479	0.4611
ArnA	167	173	TNGTYVY	6	816.365	8.5858	0.010983	1000	1.7277	0.015394	28.795	0.256567
ArnA	167	173	TNGTYVY	6	816.365	8.58495	0.005103	10000	1.98066	0.023292	33.0109	0.3882
ArnA/ArnB~P	167	173	TNGTYVY	6	816.365	8.50095	0.010366	0	0	0	0	0
ArnA/ArnB~P	167	173	TNGTYVY	6	816.365	8.55022	0.011173	10	0.285346	0.018693	4.75577	0.31155
ArnA/ArnB~P	167	173	TNGTYVY	6	816.365	8.59067	0.001161	30	0.409156	0.019291	6.81927	0.321517
ArnA/ArnB~P	167	173	TNGTYVY	6	816.365	8.57219	0.031153	100	0.714883	0.019651	11.9147	0.327517
ArnA/ArnB~P	167	173	TNGTYVY	6	816.365	8.57968	0.006	1000	1.35605	0.028748	22.6009	0.479133
ArnA/ArnB~P	167	173	TNGTYVY	6	816.365	8.57503	0.014117	10000	2.01248	0.018441	33.5413	0.30735
ArnA	172	191	VYDGKQFTPIKGKQKIEPNS	17	2276.22	7.10783	0.002669	0	0	0	0	0
ArnA	172	191	VYDGKQFTPIKGKQKIEPNS	17	2276.22	7.07325	0.00164	10	6.85328	0.103404	40.3134	0.608259
ArnA	172	191	VYDGKQFTPIKGKQKIEPNS	17	2276.22	7.07745	0.006676	30	6.86275	0.155263	40.3691	0.913312
ArnA	172	191	VYDGKQFTPIKGKQKIEPNS	17	2276.22	7.0427	0.00971	100	6.96568	0.028482	40.9746	0.167541
ArnA	172	191	VYDGKQFTPIKGKQKIEPNS	17	2276.22	7.05218	0.002205	1000	8.30646	0.129072	48.8615	0.759247
ArnA	172	191	VYDGKQFTPIKGKQKIEPNS	17	2276.22	7.03951	0.019539	10000	9.15167	0.235887	53.8334	1.38757
ArnA/ArnB~P	172	191	VYDGKQFTPIKGKQKIEPNS	17	2276.22	7.17723	0.004414	0	0	0	0	0
ArnA/ArnB~P	172	191	VYDGKQFTPIKGKQKIEPNS	17	2276.22	7.15393	0.003508	10	6.51479	0.09494	38.3223	0.558471
ArnA/ArnB~P	172	191	VYDGKQFTPIKGKQKIEPNS	17	2276.22	7.14786	0.00585	30	7.21431	0.107181	42.4371	0.630476
ArnA/ArnB~P	172	191	VYDGKQFTPIKGKQKIEPNS	17	2276.22	7.11759	0.006951	100	6.98461	0.049627	41.0859	0.291924
ArnA/ArnB~P	172	191	VYDGKQFTPIKGKQKIEPNS	17	2276.22	7.10143	0.010897	1000	8.16694	0.292267	48.0408	1.71922
ArnA/ArnB~P	172	191	VYDGKQFTPIKGKQKIEPNS	17	2276.22	7.09157	0.008358	10000	9.48503	0.295295	55.7943	1.73703
ArnA	172	192	VYDGKQFTPIKGKQKIEPNSI	18	2389.3	7.69104	0.002863	0	0	0	0	0
ArnA	172	192	VYDGKQFTPIKGKQKIEPNSI	18	2389.3	7.67077	0.003408	10	7.28363	0.110015	40.4646	0.611194
ArnA	172	192	VYDGKQFTPIKGKQKIEPNSI	18	2389.3	7.67919	0.004679	30	7.41345	0.159289	41.1858	0.884939
ArnA	172	192	VYDGKQFTPIKGKQKIEPNSI	18	2389.3	7.66031	0.006048	100	7.79352	0.01972	43.2974	0.109556
ArnA	172	192	VYDGKQFTPIKGKQKIEPNSI	18	2389.3	7.66839	0.001344	1000	9.34553	0.129443	51.9196	0.719128
ArnA	172	192	VYDGKQFTPIKGKQKIEPNSI	18	2389.3	7.65453	0.01438	10000	10.2393	0.282817	56.8851	1.57121
ArnA/ArnB~P	172	192	VYDGKQFTPIKGKQKIEPNSI	18	2389.3	7.74875	0.006603	0	0	0	0	0
ArnA/ArnB~P	172	192	VYDGKQFTPIKGKQKIEPNSI	18	2389.3	7.72382	0.004426	10	7.19438	0.058803	39.9688	0.326683
ArnA/ArnB~P	172	192	VYDGKQFTPIKGKQKIEPNSI	18	2389.3	7.72696	0.003991	30	7.78574	0.100387	43.2541	0.557706
ArnA/ArnB~P	172	192	VYDGKQFTPIKGKQKIEPNSI	18	2389.3	7.68376	0.00852	100	7.89406	0.04478	43.8559	0.248778
ArnA/ArnB~P	172	192	VYDGKQFTPIKGKQKIEPNSI	18	2389.3	7.66994	0.018925	1000	9.32574	0.303021	51.8097	1.68345
ArnA/ArnB~P	172	192	VYDGKQFTPIKGKQKIEPNSI	18	2389.3	7.67065	0.011372	10000	10.508	0.311458	58.378	1.73032
ArnA	174	186	DGKQFTPIKGKQK	11	1473.83	6.22312	0.013484	0	0	0	0	0
ArnA	174	186	DGKQFTPIKGKQK	11	1473.83	6.27032	0.009754	10	4.14927	0.019725	37.7207	0.179318
ArnA	174	186	DGKQFTPIKGKQK	11	1473.83	6.33244	0.007562	30	4.19629	0.02928	38.1481	0.266182
ArnA	174	186	DGKQFTPIKGKQK	11	1473.83	6.32986	0.004619	100	4.20274	0.035208	38.2067	0.320073
ArnA	174	186	DGKQFTPIKGKQK	11	1473.83	6.33991	0.010891	1000	5.07596	0.035479	46.1451	0.322536
ArnA	174	186	DGKQFTPIKGKQK	11	1473.83	6.31174	0.003799	10000	5.99615	0.017523	54.5105	0.1593
ArnA/ArnB~P	174	186	DGKQFTPIKGKQK	11	1473.83	6.04636	0.017985	0	0	0	0	0
ArnA/ArnB~P	174	186	DGKQFTPIKGKQK	11	1473.83	5.99006	0.024643	10	4.28751	0.021464	38.9773	0.195127
ArnA/ArnB~P	174	186	DGKQFTPIKGKQK	11	1473.83	6.04031	0.013425	30	4.28592	0.033485	38.9629	0.304409
ArnA/ArnB~P	174	186	DGKQFTPIKGKQK	11	1473.83	5.95706	0.012884	100	4.31336	0.016208	39.2124	0.147345
ArnA/ArnB~P	174	186	DGKQFTPIKGKQK	11	1473.83	5.92382	0.0162	1000	5.03402	0.014183	45.7638	0.128936
ArnA/ArnB~P	174	186	DGKQFTPIKGKQK	11	1473.83	6.23156	0.019653	10000	6.06711	0.035003	55.1555	0.318209
ArnA	174	194	DGKQFTPIKGKQKIEPNSIIK	18	2368.35	7.46065	0.023031	0	0	0	0	0
ArnA	174	194	DGKQFTPIKGKQKIEPNSIIK	18	2368.35	7.48596	0.000909	10	5.59457	0.034867	31.0809	0.193706
ArnA	174	194	DGKQFTPIKGKQKIEPNSIIK	18	2368.35	7.52286	0.025273	30	5.8721	0.032439	32.6228	0.180217
ArnA	174	194	DGKQFTPIKGKQKIEPNSIIK	18	2368.35	7.54061	0.005913	100	6.37057	0.052084	35.392	0.289356
ArnA	174	194	DGKQFTPIKGKQKIEPNSIIK	18	2368.35	7.53096	0.007892	1000	7.80737	0.034135	43.3743	0.189639
ArnA	174	194	DGKQFTPIKGKQKIEPNSIIK	18	2368.35	7.53057	0.008707	10000	8.72002	0.021033	48.4446	0.11685
ArnA/ArnB~P	174	194	DGKQFTPIKGKQKIEPNSIIK	18	2368.35	7.37728	0.010883	0	0	0	0	0
ArnA/ArnB~P	174	194	DGKQFTPIKGKQKIEPNSIIK	18	2368.35	7.43742	0.022025	10	5.5981	0.022468	31.1005	0.124822
ArnA/ArnB~P	174	194	DGKQFTPIKGKQKIEPNSIIK	18	2368.35	7.47442	0.004652	30	5.79862	0.033964	32.2146	0.188689
ArnA/ArnB~P	174	194	DGKQFTPIKGKQKIEPNSIIK	18	2368.35	7.4633	0.026634	100	6.23335	0.020742	34.6297	0.115233
ArnA/ArnB~P	174	194	DGKQFTPIKGKQKIEPNSIIK	18	2368.35	7.4447	0.0098	1000	7.49407	0.016386	41.6337	0.0910333
ArnA/ArnB~P	174	194	DGKQFTPIKGKQKIEPNSIIK	18	2368.35	7.46493	0.012874	10000	8.57702	0.016784	47.6501	0.0932444
ArnA	178	191	FTPIKGKQKIEPNS	11	1585.88	6.66672	0.004035	0	0	0	0	0
ArnA	178	191	FTPIKGKQKIEPNS	11	1585.88	6.60273	0.008848	10	3.95075	0.044821	35.9159	0.407464
ArnA	178	191	FTPIKGKQKIEPNS	11	1585.88	6.60669	0.013916	30	3.96271	0.07529	36.0247	0.684455
ArnA	178	191	FTPIKGKQKIEPNS	11	1585.88	6.58314	0.014153	100	4.14874	0.034382	37.7158	0.312564
ArnA	178	191	FTPIKGKQKIEPNS	11	1585.88	6.59416	0.002203	1000	5.03102	0.05596	45.7365	0.508727
ArnA	178	191	FTPIKGKQKIEPNS	11	1585.88	6.57553	0.018901	10000	5.72813	0.137422	52.0739	1.24929
ArnA/ArnB~P	178	191	FTPIKGKQKIEPNS	11	1585.88	6.74002	0.006116	0	0	0	0	0
ArnA/ArnB~P	178	191	FTPIKGKQKIEPNS	11	1585.88	6.72888	0.001281	10	4.03005	0.011478	36.6368	0.104345
ArnA/ArnB~P	178	191	FTPIKGKQKIEPNS	11	1585.88	6.72169	0.004287	30	4.20721	0.007716	38.2474	0.0701455
ArnA/ArnB~P	178	191	FTPIKGKQKIEPNS	11	1585.88	6.7023	0.004468	100	4.22214	0.026165	38.3831	0.237864
ArnA/ArnB~P	178	191	FTPIKGKQKIEPNS	11	1585.88	6.68148	0.013818	1000	5.10991	0.125038	46.4537	1.13671
ArnA/ArnB~P	178	191	FTPIKGKQKIEPNS	11	1585.88	6.65687	0.01468	10000	5.9493	0.1403	54.0846	1.27545
ArnA	187	194	IEPNSIIK	6	912.528	8.05596	0.025977	0	0	0	0	0
ArnA	187	194	IEPNSIIK	6	912.528	8.06037	0.007729	10	0.804814	0.013229	13.4136	0.220483
ArnA	187	194	IEPNSIIK	6	912.528	8.08536	0.025096	30	1.00083	0.014788	16.6805	0.246467
ArnA	187	194	IEPNSIIK	6	912.528	8.10821	0.000358	100	1.53136	0.033665	25.5226	0.561083
ArnA	187	194	IEPNSIIK	6	912.528	8.09126	0.009964	1000	2.12465	0.015813	35.4108	0.26355
ArnA	187	194	IEPNSIIK	6	912.528	8.09402	0.008868	10000	2.10809	0.019258	35.1348	0.320967
ArnA/ArnB~P	187	194	IEPNSIIK	6	912.528	7.9741	0.007153	0	0	0	0	0
ArnA/ArnB~P	187	194	IEPNSIIK	6	912.528	8.01995	0.019874	10	0.984637	0.013439	16.4106	0.223983
ArnA/ArnB~P	187	194	IEPNSIIK	6	912.528	8.05329	0.004012	30	1.1541	0.025391	19.2349	0.423183
ArnA/ArnB~P	187	194	IEPNSIIK	6	912.528	8.04571	0.031084	100	1.63291	0.02236	27.2152	0.372667
ArnA/ArnB~P	187	194	IEPNSIIK	6	912.528	8.03857	0.007439	1000	2.2072	0.031547	36.7867	0.525783
ArnA/ArnB~P	187	194	IEPNSIIK	6	912.528	8.04566	0.015578	10000	2.16892	0.014982	36.1486	0.2497
ArnA	189	194	PNSIIK	4	670.401	8.058	0.027307	0	0	0	0	0
ArnA	189	194	PNSIIK	4	670.401	8.062	0.008197	10	0.698	0.03749	17.45	0.93725
ArnA	189	194	PNSIIK	4	670.401	8.08549	0.024584	30	0.885543	0.035456	22.1386	0.8864
ArnA	189	194	PNSIIK	4	670.401	8.10768	0.002363	100	1.39515	0.062259	34.8788	1.55648
ArnA	189	194	PNSIIK	4	670.401	8.09239	0.009268	1000	1.91497	0.043402	47.8743	1.08505
ArnA	189	194	PNSIIK	4	670.401	8.09643	0.009156	10000	1.89976	0.041389	47.4939	1.03473
ArnA/ArnB~P	189	194	PNSIIK	4	670.401	7.97671	0.005145	0	0	0	0	0
ArnA/ArnB~P	189	194	PNSIIK	4	670.401	8.02474	0.021143	10	0.80256	0.010812	20.064	0.2703
ArnA/ArnB~P	189	194	PNSIIK	4	670.401	8.06009	0.002689	30	0.962052	0.017282	24.0513	0.43205
ArnA/ArnB~P	189	194	PNSIIK	4	670.401	8.0528	0.028122	100	1.44128	0.01436	36.0321	0.359
ArnA/ArnB~P	189	194	PNSIIK	4	670.401	8.04428	0.007029	1000	1.93315	0.013002	48.3289	0.32505
ArnA/ArnB~P	189	194	PNSIIK	4	670.401	8.05142	0.015751	10000	1.90684	0.008783	47.6709	0.219575
ArnA	192	198	IIKLGNQ	6	784.48	7.67043	0.00278	0	0	0	0	0
ArnA	192	198	IIKLGNQ	6	784.48	7.65167	0.0022	10	1.08516	0.044988	18.086	0.7498
ArnA	192	198	IIKLGNQ	6	784.48	7.65322	0.002514	30	1.20027	0.057773	20.0045	0.962883
ArnA	192	198	IIKLGNQ	6	784.48	7.63163	0.008262	100	1.17544	0.045654	19.5907	0.7609
ArnA	192	198	IIKLGNQ	6	784.48	7.6422	0.001005	1000	1.16614	0.04624	19.4357	0.770667
ArnA	192	198	IIKLGNQ	6	784.48	7.62981	0.018767	10000	1.47705	0.044696	24.6174	0.744933
ArnA/ArnB~P	192	198	IIKLGNQ	6	784.48	7.68913	0.006211	0	0	0	0	0
ArnA/ArnB~P	192	198	IIKLGNQ	6	784.48	7.68767	0.000439	10	0.619516	0.011863	10.3253	0.197717
ArnA/ArnB~P	192	198	IIKLGNQ	6	784.48	7.6886	0.00351	30	0.824486	0.01601	13.7414	0.266833
ArnA/ArnB~P	192	198	IIKLGNQ	6	784.48	7.67206	0.005562	100	1.101	0.008667	18.35	0.14445
ArnA/ArnB~P	192	198	IIKLGNQ	6	784.48	7.66003	0.008582	1000	1.26061	0.008822	21.0101	0.147033
ArnA/ArnB~P	192	198	IIKLGNQ	6	784.48	7.65941	0.007698	10000	1.50705	0.029594	25.1176	0.493233
ArnA	192	199	IIKLGNQT	7	885.528	7.65251	0.00335	0	0	0	0	0
ArnA	192	199	IIKLGNQT	7	885.528	7.63448	0.001666	10	1.12098	0.030827	16.0141	0.440386
ArnA	192	199	IIKLGNQT	7	885.528	7.63687	0.001998	30	1.19863	0.026275	17.1233	0.375357
ArnA	192	199	IIKLGNQT	7	885.528	7.61518	0.008777	100	1.18878	0.017733	16.9826	0.253329
ArnA	192	199	IIKLGNQT	7	885.528	7.62723	0.000862	1000	1.27218	0.029271	18.1739	0.418157
ArnA	192	199	IIKLGNQT	7	885.528	7.61191	0.019027	10000	1.89598	0.020987	27.0854	0.299814
ArnA/ArnB~P	192	199	IIKLGNQT	7	885.528	7.66858	0.007841	0	0	0	0	0
ArnA/ArnB~P	192	199	IIKLGNQT	7	885.528	7.66776	0.001826	10	0.679221	0.009582	9.70316	0.136886
ArnA/ArnB~P	192	199	IIKLGNQT	7	885.528	7.66958	0.003321	30	0.909803	0.013527	12.9972	0.193243
ArnA/ArnB~P	192	199	IIKLGNQT	7	885.528	7.65402	0.00498	100	1.22926	0.008911	17.5609	0.1273
ArnA/ArnB~P	192	199	IIKLGNQT	7	885.528	7.64156	0.008277	1000	1.37925	0.011527	19.7036	0.164671
ArnA/ArnB~P	192	199	IIKLGNQT	7	885.528	7.64114	0.008187	10000	1.87824	0.042518	26.832	0.6074
ArnA	192	200	IIKLGNQTI	8	998.612	8.82398	0.003051	0	0	0	0	0
ArnA	192	200	IIKLGNQTI	8	998.612	8.81486	0.006983	10	1.11665	0.015637	13.9582	0.195463
ArnA	192	200	IIKLGNQTI	8	998.612	8.82689	0.008501	30	1.14099	0.015627	14.2624	0.195337
ArnA	192	200	IIKLGNQTI	8	998.612	8.8188	0.001127	100	1.1151	0.008034	13.9388	0.100425
ArnA	192	200	IIKLGNQTI	8	998.612	8.83247	0.008973	1000	1.21408	0.008775	15.1759	0.109687
ArnA	192	200	IIKLGNQTI	8	998.612	8.82169	0.008198	10000	1.85898	0.024021	23.2372	0.300262
ArnA/ArnB~P	192	200	IIKLGNQTI	8	998.612	8.83635	0.004937	0	0	0	0	0
ArnA/ArnB~P	192	200	IIKLGNQTI	8	998.612	8.83518	0.002606	10	0.65332	0.016372	8.1665	0.20465
ArnA/ArnB~P	192	200	IIKLGNQTI	8	998.612	8.84408	0.002714	30	0.864709	0.027008	10.8089	0.3376
ArnA/ArnB~P	192	200	IIKLGNQTI	8	998.612	8.81843	0.004101	100	1.16338	0.01928	14.5423	0.241
ArnA/ArnB~P	192	200	IIKLGNQTI	8	998.612	8.81899	0.013813	1000	1.32895	0.019558	16.6119	0.244475
ArnA/ArnB~P	192	200	IIKLGNQTI	8	998.612	8.82479	0.01024	10000	1.82883	0.052954	22.8604	0.661925

## Sheet: PeptideHDX_ArnB
Protein state	Start	End	Peptide sequence	Maximal uptake (#)	Peptide mass (Da)	Retention time SD (min)	Retention time (min)	HDX time (s)	Uptake (Da)	Uptake SD (Da)	Uptake (%)	Uptake SD (%)
ArnB	1	6	ATISVK	5	617.374	6.77081	0.010418	0	0	0	0	0
ArnB	1	6	ATISVK	5	617.374	6.81144	0.026984	10	1.87639	0.01429	37.5278	0.2858
ArnB	1	6	ATISVK	5	617.374	6.85602	0.025268	30	2.01843	0.018694	40.3686	0.37388
ArnB	1	6	ATISVK	5	617.374	6.83801	0.011864	100	2.17488	0.010245	43.4976	0.2049
ArnB	1	6	ATISVK	5	617.374	6.85448	0.007982	1000	2.36571	0.014658	47.3141	0.29316
ArnB	1	6	ATISVK	5	617.374	6.83545	0.02018	10000	2.81722	0.017664	56.3443	0.35328
ArnB~P	1	6	ATISVK	5	617.374	6.60447	0.018092	0	0	0	0	0
ArnB~P	1	6	ATISVK	5	617.374	6.66789	0.063877	10	1.89726	0.016872	37.9453	0.33744
ArnB~P	1	6	ATISVK	5	617.374	6.63162	0.031803	30	2.10227	0.028338	42.0454	0.56676
ArnB~P	1	6	ATISVK	5	617.374	6.79526	0.02393	100	2.29627	0.041131	45.9253	0.82262
ArnB~P	1	6	ATISVK	5	617.374	6.64795	0.05019	1000	2.6707	0.019662	53.4139	0.39324
ArnB~P	1	6	ATISVK	5	617.374	6.76501	0.01871	10000	2.81201	0.019876	56.2401	0.39752
ArnA/ArnB~P	1	6	ATISVK	5	617.374	6.63537	0.01009	0	0	0	0	0
ArnA/ArnB~P	1	6	ATISVK	5	617.374	6.65329	0.029376	10	1.88479	0.011062	37.6958	0.22124
ArnA/ArnB~P	1	6	ATISVK	5	617.374	6.70777	0.017853	30	2.05906	0.046202	41.1811	0.92404
ArnA/ArnB~P	1	6	ATISVK	5	617.374	6.67006	0.019019	100	2.322	0.027738	46.4401	0.55476
ArnA/ArnB~P	1	6	ATISVK	5	617.374	6.6196	0.007358	1000	2.66616	0.022745	53.3232	0.4549
ArnA/ArnB~P	1	6	ATISVK	5	617.374	6.79104	0.020927	10000	2.81476	0.016289	56.2953	0.32578
ArnB	1	8	ATISVKAE	7	817.454	7.08742	0.004787	0	0	0	0	0
ArnB	1	8	ATISVKAE	7	817.454	7.10749	0.025536	10	2.99415	0.032862	42.7736	0.469457
ArnB	1	8	ATISVKAE	7	817.454	7.14607	0.020372	30	3.22809	0.040865	46.1155	0.583786
ArnB	1	8	ATISVKAE	7	817.454	7.13107	0.007897	100	3.59519	0.029072	51.3598	0.415314
ArnB	1	8	ATISVKAE	7	817.454	7.14767	0.004313	1000	4.15468	0.024407	59.3525	0.348671
ArnB	1	8	ATISVKAE	7	817.454	7.12788	0.015853	10000	4.6428	0.013552	66.3257	0.1936
ArnB~P	1	8	ATISVKAE	7	817.454	6.95285	0.01789	0	0	0	0	0
ArnB~P	1	8	ATISVKAE	7	817.454	7.03664	0.06051	10	3.01452	0.012226	43.0645	0.174657
ArnB~P	1	8	ATISVKAE	7	817.454	7.03307	0.044789	30	3.29771	0.02689	47.1102	0.384143
ArnB~P	1	8	ATISVKAE	7	817.454	7.1385	0.022891	100	3.65241	0.037785	52.1773	0.539786
ArnB~P	1	8	ATISVKAE	7	817.454	7.05592	0.034535	1000	4.44367	0.020909	63.4811	0.2987
ArnB~P	1	8	ATISVKAE	7	817.454	7.09272	0.016706	10000	4.58192	0.018117	65.456	0.258814
ArnA/ArnB~P	1	8	ATISVKAE	7	817.454	6.96823	0.009823	0	0	0	0	0
ArnA/ArnB~P	1	8	ATISVKAE	7	817.454	7.04719	0.022985	10	3.00932	0.005268	42.9903	0.0752571
ArnA/ArnB~P	1	8	ATISVKAE	7	817.454	7.08544	0.014803	30	3.27882	0.012427	46.8403	0.177529
ArnA/ArnB~P	1	8	ATISVKAE	7	817.454	7.06966	0.021817	100	3.60195	0.011266	51.4565	0.160943
ArnA/ArnB~P	1	8	ATISVKAE	7	817.454	7.03807	0.007478	1000	4.44411	0.006293	63.4872	0.0899
ArnA/ArnB~P	1	8	ATISVKAE	7	817.454	7.11519	0.016403	10000	4.6229	0.022167	66.0415	0.316671
ArnB	3	6	ISVK	3	445.29	6.76969	0.009909	0	0	0	0	0
ArnB	3	6	ISVK	3	445.29	6.80939	0.026056	10	1.59801	0.017085	53.2669	0.5695
ArnB	3	6	ISVK	3	445.29	6.85682	0.022677	30	1.72392	0.013853	57.4639	0.461767
ArnB	3	6	ISVK	3	445.29	6.83768	0.010512	100	1.83397	0.014715	61.1325	0.4905
ArnB	3	6	ISVK	3	445.29	6.85478	0.00796	1000	1.97599	0.021682	65.8663	0.722733
ArnB	3	6	ISVK	3	445.29	6.83683	0.019583	10000	2.35572	0.015765	78.5241	0.5255
ArnB~P	3	6	ISVK	3	445.29	6.60392	0.017666	0	0	0	0	0
ArnB~P	3	6	ISVK	3	445.29	6.67112	0.064492	10	1.7346	0.010342	57.8201	0.344733
ArnB~P	3	6	ISVK	3	445.29	6.63074	0.031575	30	1.89421	0.012696	63.1404	0.4232
ArnB~P	3	6	ISVK	3	445.29	6.79583	0.023158	100	2.00883	0.015634	66.961	0.521133
ArnB~P	3	6	ISVK	3	445.29	6.64728	0.049288	1000	2.25332	0.008499	75.1105	0.2833
ArnB~P	3	6	ISVK	3	445.29	6.76088	0.017518	10000	2.37185	0.016719	79.0617	0.5573
ArnA/ArnB~P	3	6	ISVK	3	445.29	6.6305	0.01018	0	0	0	0	0
ArnA/ArnB~P	3	6	ISVK	3	445.29	6.65246	0.029815	10	1.72621	0.007945	57.5404	0.264833
ArnA/ArnB~P	3	6	ISVK	3	445.29	6.70699	0.017744	30	1.87006	0.019589	62.3354	0.652967
ArnA/ArnB~P	3	6	ISVK	3	445.29	6.66931	0.017852	100	2.02242	0.009634	67.414	0.321133
ArnA/ArnB~P	3	6	ISVK	3	445.29	6.61981	0.006461	1000	2.27677	0.008377	75.8923	0.279233
ArnA/ArnB~P	3	6	ISVK	3	445.29	6.78799	0.020998	10000	2.38007	0.015272	79.3355	0.509067
ArnB	7	13	AELSHKY	6	846.423	6.64836	0.010364	0	0	0	0	0
ArnB	7	13	AELSHKY	6	846.423	6.69986	0.028257	10	0.829746	0.045523	13.8291	0.758717
ArnB	7	13	AELSHKY	6	846.423	6.75459	0.020698	30	0.912914	0.01891	15.2152	0.315167
ArnB	7	13	AELSHKY	6	846.423	6.73906	0.010864	100	1.06555	0.014206	17.7592	0.236767
ArnB	7	13	AELSHKY	6	846.423	6.75641	0.009635	1000	1.21087	0.024403	20.1811	0.406717
ArnB	7	13	AELSHKY	6	846.423	6.73859	0.017409	10000	1.5028	0.030121	25.0467	0.502017
ArnB~P	7	13	AELSHKY	6	846.423	6.46563	0.02008	0	0	0	0	0
ArnB~P	7	13	AELSHKY	6	846.423	6.53659	0.066879	10	0.798074	0.035966	13.3012	0.599433
ArnB~P	7	13	AELSHKY	6	846.423	6.5044	0.037531	30	0.965256	0.015802	16.0876	0.263367
ArnB~P	7	13	AELSHKY	6	846.423	6.67336	0.023529	100	1.07404	0.031192	17.9006	0.519867
ArnB~P	7	13	AELSHKY	6	846.423	6.51258	0.044144	1000	1.19674	0.011826	19.9457	0.1971
ArnB~P	7	13	AELSHKY	6	846.423	6.63391	0.021057	10000	1.49551	0.050024	24.9251	0.833733
ArnA/ArnB~P	7	13	AELSHKY	6	846.423	6.4932	0.011294	0	0	0	0	0
ArnA/ArnB~P	7	13	AELSHKY	6	846.423	6.51728	0.023832	10	0.691494	0.027111	11.5249	0.45185
ArnA/ArnB~P	7	13	AELSHKY	6	846.423	6.55942	0.023407	30	0.792105	0.017719	13.2017	0.295317
ArnA/ArnB~P	7	13	AELSHKY	6	846.423	6.51837	0.014269	100	0.914843	0.029923	15.2474	0.498717
ArnA/ArnB~P	7	13	AELSHKY	6	846.423	6.48288	0.010606	1000	1.11029	0.012839	18.5049	0.213983
ArnA/ArnB~P	7	13	AELSHKY	6	846.423	6.67418	0.024257	10000	1.17238	0.013439	19.5397	0.223983
ArnB	7	25	AELSHKYSFTSPLKGVFRL	17	2179.18	9.52927	0.014469	0	0	0	0	0
ArnB	7	25	AELSHKYSFTSPLKGVFRL	17	2179.18	9.55487	0.010378	10	2.97143	0.05524	17.479	0.324941
ArnB	7	25	AELSHKYSFTSPLKGVFRL	17	2179.18	9.59739	0.015678	30	3.09166	0.017895	18.1862	0.105265
ArnB	7	25	AELSHKYSFTSPLKGVFRL	17	2179.18	9.58502	0.012563	100	3.29213	0.024048	19.3655	0.141459
ArnB	7	25	AELSHKYSFTSPLKGVFRL	17	2179.18	9.57129	0.033368	1000	4.30258	0.041263	25.3093	0.242724
ArnB	7	25	AELSHKYSFTSPLKGVFRL	17	2179.18	9.56508	0.00828	10000	5.52635	0.047618	32.508	0.280106
ArnB~P	7	25	AELSHKYSFTSPLKGVFRL	17	2179.18	9.53814	0.009237	0	0	0	0	0
ArnB~P	7	25	AELSHKYSFTSPLKGVFRL	17	2179.18	9.50379	0.020673	10	2.95819	0.032419	17.4011	0.1907
ArnB~P	7	25	AELSHKYSFTSPLKGVFRL	17	2179.18	9.5272	0.019948	30	3.10413	0.034372	18.2596	0.202188
ArnB~P	7	25	AELSHKYSFTSPLKGVFRL	17	2179.18	9.50905	0.019838	100	3.29055	0.024628	19.3562	0.144871
ArnB~P	7	25	AELSHKYSFTSPLKGVFRL	17	2179.18	9.5163	0.059072	1000	4.39647	0.045966	25.8616	0.270388
ArnB~P	7	25	AELSHKYSFTSPLKGVFRL	17	2179.18	9.55293	0.024442	10000	5.60502	0.029029	32.9707	0.170759
ArnA/ArnB~P	7	25	AELSHKYSFTSPLKGVFRL	17	2179.18	9.50853	0.011718	0	0	0	0	0
ArnA/ArnB~P	7	25	AELSHKYSFTSPLKGVFRL	17	2179.18	9.52788	0.005912	10	2.61193	0.031223	15.3643	0.183665
ArnA/ArnB~P	7	25	AELSHKYSFTSPLKGVFRL	17	2179.18	9.55491	0.013339	30	2.83891	0.028384	16.6994	0.166965
ArnA/ArnB~P	7	25	AELSHKYSFTSPLKGVFRL	17	2179.18	9.53829	0.011591	100	2.99451	0.038111	17.6148	0.224182
ArnA/ArnB~P	7	25	AELSHKYSFTSPLKGVFRL	17	2179.18	9.56077	0.01467	1000	3.33524	0.029836	19.6191	0.175506
ArnA/ArnB~P	7	25	AELSHKYSFTSPLKGVFRL	17	2179.18	9.549	0.013938	10000	4.03512	0.050526	23.736	0.297212
ArnB	10	22	SHKYSFTSPLKGV	11	1449.76	8.52515	0.007893	0	0	0	0	0
ArnB	10	22	SHKYSFTSPLKGV	11	1449.76	8.54933	0.016735	10	2.27573	0.037119	20.6884	0.337445
ArnB	10	22	SHKYSFTSPLKGV	11	1449.76	8.60254	0.002781	30	2.38404	0.013145	21.6731	0.1195
ArnB	10	22	SHKYSFTSPLKGV	11	1449.76	8.5892	0.011492	100	2.56573	0.011211	23.3248	0.101918
ArnB	10	22	SHKYSFTSPLKGV	11	1449.76	8.6068	0.008601	1000	3.50367	0.007795	31.8516	0.0708636
ArnB	10	22	SHKYSFTSPLKGV	11	1449.76	8.57747	0.01048	10000	4.4271	0.015016	40.2464	0.136509
ArnB~P	10	22	SHKYSFTSPLKGV	11	1449.76	8.49786	0.009651	0	0	0	0	0
ArnB~P	10	22	SHKYSFTSPLKGV	11	1449.76	8.50898	0.015076	10	2.1593	0.024472	19.63	0.222473
ArnB~P	10	22	SHKYSFTSPLKGV	11	1449.76	8.51747	0.028178	30	2.26464	0.036724	20.5876	0.333855
ArnB~P	10	22	SHKYSFTSPLKGV	11	1449.76	8.5587	0.015148	100	2.42733	0.034182	22.0667	0.310745
ArnB~P	10	22	SHKYSFTSPLKGV	11	1449.76	8.51757	0.04119	1000	3.42097	0.027514	31.0998	0.250127
ArnB~P	10	22	SHKYSFTSPLKGV	11	1449.76	8.53433	0.006546	10000	4.33083	0.017903	39.3712	0.162755
ArnA/ArnB~P	10	22	SHKYSFTSPLKGV	11	1449.76	8.48874	0.011061	0	0	0	0	0
ArnA/ArnB~P	10	22	SHKYSFTSPLKGV	11	1449.76	8.51517	0.007976	10	1.96722	0.023904	17.8838	0.217309
ArnA/ArnB~P	10	22	SHKYSFTSPLKGV	11	1449.76	8.54788	0.002095	30	2.1375	0.032463	19.4318	0.295118
ArnA/ArnB~P	10	22	SHKYSFTSPLKGV	11	1449.76	8.51678	0.032805	100	2.2073	0.045648	20.0664	0.414982
ArnA/ArnB~P	10	22	SHKYSFTSPLKGV	11	1449.76	8.53139	0.006117	1000	2.56227	0.011563	23.2934	0.105118
ArnA/ArnB~P	10	22	SHKYSFTSPLKGV	11	1449.76	8.52778	0.011152	10000	3.17105	0.040906	28.8277	0.371873
ArnB	14	25	SFTSPLKGVFRL	10	1350.77	10.0118	0.017104	0	0	0	0	0
ArnB	14	25	SFTSPLKGVFRL	10	1350.77	10.025	0.004061	10	2.08244	0.028965	20.8244	0.28965
ArnB	14	25	SFTSPLKGVFRL	10	1350.77	10.0647	0.016009	30	2.13642	0.017265	21.3642	0.17265
ArnB	14	25	SFTSPLKGVFRL	10	1350.77	10.0484	0.007489	100	2.29234	0.012785	22.9234	0.12785
ArnB	14	25	SFTSPLKGVFRL	10	1350.77	10.0476	0.025123	1000	2.95398	0.011243	29.5399	0.11243
ArnB	14	25	SFTSPLKGVFRL	10	1350.77	10.0393	0.005136	10000	3.61237	0.019884	36.1237	0.19884
ArnB~P	14	25	SFTSPLKGVFRL	10	1350.77	10.0141	0.014667	0	0	0	0	0
ArnB~P	14	25	SFTSPLKGVFRL	10	1350.77	9.97668	0.006953	10	2.04843	0.014043	20.4843	0.14043
ArnB~P	14	25	SFTSPLKGVFRL	10	1350.77	9.98286	0.016278	30	2.13906	0.035142	21.3906	0.35142
ArnB~P	14	25	SFTSPLKGVFRL	10	1350.77	9.95485	0.022077	100	2.28189	0.01108	22.8189	0.1108
ArnB~P	14	25	SFTSPLKGVFRL	10	1350.77	10.0036	0.047405	1000	2.99701	0.018341	29.9701	0.18341
ArnB~P	14	25	SFTSPLKGVFRL	10	1350.77	10.0403	0.022245	10000	3.6171	0.017699	36.171	0.17699
ArnA/ArnB~P	14	25	SFTSPLKGVFRL	10	1350.77	9.96254	0.016101	0	0	0	0	0
ArnA/ArnB~P	14	25	SFTSPLKGVFRL	10	1350.77	9.98721	0.022447	10	1.91892	0.02144	19.1892	0.2144
ArnA/ArnB~P	14	25	SFTSPLKGVFRL	10	1350.77	9.99988	0.027663	30	2.08003	0.053472	20.8003	0.53472
ArnA/ArnB~P	14	25	SFTSPLKGVFRL	10	1350.77	9.98968	0.014606	100	2.20296	0.028064	22.0296	0.28064
ArnA/ArnB~P	14	25	SFTSPLKGVFRL	10	1350.77	10.019	0.006316	1000	2.466	0.023123	24.66	0.23123
ArnA/ArnB~P	14	25	SFTSPLKGVFRL	10	1350.77	10.0152	0.022398	10000	2.86445	0.036884	28.6445	0.36884
ArnB	18	23	PLKGVF	4	659.4	9.39914	0.021332	0	0	0	0	0
ArnB	18	23	PLKGVF	4	659.4	9.40604	0.008398	10	1.18461	0.02078	29.6154	0.5195
ArnB	18	23	PLKGVF	4	659.4	9.38719	0.001986	30	1.20591	0.034059	30.1476	0.851475
ArnB	18	23	PLKGVF	4	659.4	9.36068	0.01698	100	1.27377	0.035864	31.8443	0.8966
ArnB	18	23	PLKGVF	4	659.4	9.36896	0.003135	1000	1.64231	0.024649	41.0578	0.616225
ArnB	18	23	PLKGVF	4	659.4	9.35653	0.011278	10000	2.29162	0.025518	57.2904	0.63795
ArnB~P	18	23	PLKGVF	4	659.4	9.65862	0.022328	0	0	0	0	0
ArnB~P	18	23	PLKGVF	4	659.4	9.68556	0.034095	10	1.19075	0.050138	29.7688	1.25345
ArnB~P	18	23	PLKGVF	4	659.4	9.52908	0.006196	30	1.10286	0.073991	27.5714	1.84977
ArnB~P	18	23	PLKGVF	4	659.4	9.51059	0.022833	100	1.31503	0.046047	32.8757	1.15117
ArnB~P	18	23	PLKGVF	4	659.4	9.44368	0.005223	1000	1.54601	0.136854	38.6503	3.42135
ArnB~P	18	23	PLKGVF	4	659.4	9.40182	0.004152	10000	2.29646	0.047709	57.4116	1.19273
ArnA/ArnB~P	18	23	PLKGVF	4	659.4	9.73042	0.025462	0	0	0	0	0
ArnA/ArnB~P	18	23	PLKGVF	4	659.4	9.66397	0.012325	10	1.12342	0.035802	28.0856	0.89505
ArnA/ArnB~P	18	23	PLKGVF	4	659.4	9.46295	0.013278	30	1.11578	0.028715	27.8944	0.717875
ArnA/ArnB~P	18	23	PLKGVF	4	659.4	9.51037	0.119518	100	1.22344	0.04813	30.5859	1.20325
ArnA/ArnB~P	18	23	PLKGVF	4	659.4	9.3848	0.025857	1000	1.42822	0.036404	35.7054	0.9101
ArnA/ArnB~P	18	23	PLKGVF	4	659.4	9.37146	0.022231	10000	1.70958	0.074538	42.7395	1.86345
ArnB	25	30	LIIVPE	4	682.426	9.29948	0.008397	0	0	0	0	0
ArnB	25	30	LIIVPE	4	682.426	9.31591	0.009869	10	0.679339	0.008157	16.9835	0.203925
ArnB	25	30	LIIVPE	4	682.426	9.34248	0.012603	30	0.699617	0.007869	17.4904	0.196725
ArnB	25	30	LIIVPE	4	682.426	9.32348	0.009228	100	0.707768	0.011383	17.6942	0.284575
ArnB	25	30	LIIVPE	4	682.426	9.33995	0.007574	1000	0.795905	0.00934	19.8976	0.2335
ArnB	25	30	LIIVPE	4	682.426	9.30721	0.005791	10000	1.40622	0.007776	35.1556	0.1944
ArnB~P	25	30	LIIVPE	4	682.426	9.27105	0.014364	0	0	0	0	0
ArnB~P	25	30	LIIVPE	4	682.426	9.27528	0.027174	10	0.607755	0.010819	15.1939	0.270475
ArnB~P	25	30	LIIVPE	4	682.426	9.30277	0.02855	30	0.688934	0.010538	17.2233	0.26345
ArnB~P	25	30	LIIVPE	4	682.426	9.31954	0.006531	100	0.703075	0.011046	17.5769	0.27615
ArnB~P	25	30	LIIVPE	4	682.426	9.30718	0.056694	1000	0.843352	0.011894	21.0838	0.29735
ArnB~P	25	30	LIIVPE	4	682.426	9.32978	0.016328	10000	1.44525	0.008981	36.1312	0.224525
ArnA/ArnB~P	25	30	LIIVPE	4	682.426	9.25512	0.008044	0	0	0	0	0
ArnA/ArnB~P	25	30	LIIVPE	4	682.426	9.28182	0.007179	10	0.564867	0.011758	14.1217	0.29395
ArnA/ArnB~P	25	30	LIIVPE	4	682.426	9.32881	0.012495	30	0.653252	0.013085	16.3313	0.327125
ArnA/ArnB~P	25	30	LIIVPE	4	682.426	9.30557	0.037818	100	0.71084	0.013687	17.771	0.342175
ArnA/ArnB~P	25	30	LIIVPE	4	682.426	9.32985	0.011403	1000	0.842462	0.013925	21.0616	0.348125
ArnA/ArnB~P	25	30	LIIVPE	4	682.426	9.31002	0.010116	10000	1.46432	0.016797	36.6079	0.419925
ArnB	25	31	LIIVPEK	5	810.521	8.20026	0.006391	0	0	0	0	0
ArnB	25	31	LIIVPEK	5	810.521	8.22697	0.022476	10	1.20144	0.014121	24.0288	0.28242
ArnB	25	31	LIIVPEK	5	810.521	8.26751	0.020078	30	1.25367	0.00817	25.0734	0.1634
ArnB	25	31	LIIVPEK	5	810.521	8.25172	0.008941	100	1.22832	0.02317	24.5664	0.4634
ArnB	25	31	LIIVPEK	5	810.521	8.26745	0.001068	1000	1.33709	0.009151	26.7417	0.18302
ArnB	25	31	LIIVPEK	5	810.521	8.24411	0.014288	10000	1.8652	0.007766	37.3041	0.15532
ArnB~P	25	31	LIIVPEK	5	810.521	8.14766	0.011678	0	0	0	0	0
ArnB~P	25	31	LIIVPEK	5	810.521	8.17641	0.015245	10	1.10013	0.019952	22.0027	0.39904
ArnB~P	25	31	LIIVPEK	5	810.521	8.19698	0.032558	30	1.19174	0.022931	23.8348	0.45862
ArnB~P	25	31	LIIVPEK	5	810.521	8.25014	0.018854	100	1.18224	0.019308	23.6448	0.38616
ArnB~P	25	31	LIIVPEK	5	810.521	8.19638	0.034275	1000	1.32991	0.020295	26.5983	0.4059
ArnB~P	25	31	LIIVPEK	5	810.521	8.21313	0.004241	10000	1.85881	0.020103	37.1762	0.40206
ArnA/ArnB~P	25	31	LIIVPEK	5	810.521	8.14496	0.006725	0	0	0	0	0
ArnA/ArnB~P	25	31	LIIVPEK	5	810.521	8.18202	0.015647	10	1.09658	0.021805	21.9317	0.4361
ArnA/ArnB~P	25	31	LIIVPEK	5	810.521	8.22082	0.002881	30	1.09938	0.07084	21.9876	1.4168
ArnA/ArnB~P	25	31	LIIVPEK	5	810.521	8.20761	0.032105	100	1.20832	0.018233	24.1664	0.36466
ArnA/ArnB~P	25	31	LIIVPEK	5	810.521	8.20535	0.007865	1000	1.33738	0.018596	26.7477	0.37192
ArnA/ArnB~P	25	31	LIIVPEK	5	810.521	8.20666	0.019342	10000	1.88077	0.047631	37.6153	0.95262
ArnB	26	31	IIVPEK	4	697.437	7.21455	0.003415	0	0	0	0	0
ArnB	26	31	IIVPEK	4	697.437	7.23933	0.024096	10	1.25717	0.011815	31.4293	0.295375
ArnB	26	31	IIVPEK	4	697.437	7.27416	0.016574	30	1.26967	0.010425	31.7418	0.260625
ArnB	26	31	IIVPEK	4	697.437	7.26261	0.006686	100	1.24642	0.006074	31.1605	0.15185
ArnB	26	31	IIVPEK	4	697.437	7.27775	0.002683	1000	1.35008	0.005617	33.7521	0.140425
ArnB	26	31	IIVPEK	4	697.437	7.25887	0.013791	10000	1.91413	0.009056	47.8533	0.2264
ArnB~P	26	31	IIVPEK	4	697.437	7.09223	0.01517	0	0	0	0	0
ArnB~P	26	31	IIVPEK	4	697.437	7.15742	0.05244	10	1.19482	0.009617	29.8705	0.240425
ArnB~P	26	31	IIVPEK	4	697.437	7.16301	0.045297	30	1.27668	0.011395	31.9169	0.284875
ArnB~P	26	31	IIVPEK	4	697.437	7.26438	0.020508	100	1.26588	0.009182	31.647	0.22955
ArnB~P	26	31	IIVPEK	4	697.437	7.19601	0.032475	1000	1.41751	0.00782	35.4378	0.1955
ArnB~P	26	31	IIVPEK	4	697.437	7.21791	0.015359	10000	1.93644	0.009095	48.4109	0.227375
ArnA/ArnB~P	26	31	IIVPEK	4	697.437	7.1017	0.010638	0	0	0	0	0
ArnA/ArnB~P	26	31	IIVPEK	4	697.437	7.17781	0.024232	10	1.15262	0.011055	28.8154	0.276375
ArnA/ArnB~P	26	31	IIVPEK	4	697.437	7.21849	0.011218	30	1.2427	0.024999	31.0675	0.624975
ArnA/ArnB~P	26	31	IIVPEK	4	697.437	7.2099	0.025042	100	1.27955	0.011783	31.9887	0.294575
ArnA/ArnB~P	26	31	IIVPEK	4	697.437	7.1757	0.005676	1000	1.43049	0.014028	35.7622	0.3507
ArnA/ArnB~P	26	31	IIVPEK	4	697.437	7.23511	0.012988	10000	1.9705	0.01101	49.2626	0.27525
ArnB	26	33	IIVPEKVS	6	883.537	7.70732	0.00249	0	0	0	0	0
ArnB	26	33	IIVPEKVS	6	883.537	7.7252	0.02398	10	3.03952	0.012466	50.6587	0.207767
ArnB	26	33	IIVPEKVS	6	883.537	7.76152	0.018057	30	3.10419	0.031043	51.7364	0.517383
ArnB	26	33	IIVPEKVS	6	883.537	7.74738	0.007666	100	3.09871	0.016815	51.6451	0.28025
ArnB	26	33	IIVPEKVS	6	883.537	7.76512	0.001666	1000	3.18299	0.025385	53.0499	0.423083
ArnB	26	33	IIVPEKVS	6	883.537	7.74145	0.013448	10000	3.75531	0.053099	62.5885	0.884983
ArnB~P	26	33	IIVPEKVS	6	883.537	7.62015	0.013702	0	0	0	0	0
ArnB~P	26	33	IIVPEKVS	6	883.537	7.66446	0.028205	10	2.95742	0.045512	49.2903	0.758533
ArnB~P	26	33	IIVPEKVS	6	883.537	7.68224	0.032438	30	3.04302	0.022918	50.7171	0.381967
ArnB~P	26	33	IIVPEKVS	6	883.537	7.74265	0.022348	100	3.01594	0.047977	50.2657	0.799617
ArnB~P	26	33	IIVPEKVS	6	883.537	7.69698	0.02854	1000	3.12928	0.025402	52.1546	0.423367
ArnB~P	26	33	IIVPEKVS	6	883.537	7.71048	0.004082	10000	3.67306	0.022112	61.2176	0.368533
ArnA/ArnB~P	26	33	IIVPEKVS	6	883.537	7.62709	0.010337	0	0	0	0	0
ArnA/ArnB~P	26	33	IIVPEKVS	6	883.537	7.68628	0.020573	10	2.83313	0.015421	47.2188	0.257017
ArnA/ArnB~P	26	33	IIVPEKVS	6	883.537	7.7258	0.004565	30	2.95419	0.077821	49.2366	1.29702
ArnA/ArnB~P	26	33	IIVPEKVS	6	883.537	7.7159	0.029786	100	3.01049	0.018803	50.1748	0.313383
ArnA/ArnB~P	26	33	IIVPEKVS	6	883.537	7.70101	0.009921	1000	3.13642	0.035201	52.2737	0.586683
ArnA/ArnB~P	26	33	IIVPEKVS	6	883.537	7.71739	0.015023	10000	3.67903	0.022954	61.3171	0.382567
ArnB	26	34	IIVPEKVST	7	984.585	7.69869	0.005031	0	0	0	0	0
ArnB	26	34	IIVPEKVST	7	984.585	7.71001	0.006376	10	3.84547	0.025435	54.9353	0.363357
ArnB	26	34	IIVPEKVST	7	984.585	7.6936	0.009899	30	4.01535	0.010136	57.3622	0.1448
ArnB	26	34	IIVPEKVST	7	984.585	7.6861	0.01341	100	3.74236	0.047636	53.4622	0.680514
ArnB	26	34	IIVPEKVST	7	984.585	7.69246	0.00808	1000	4.01585	0.055266	57.3692	0.789514
ArnB	26	34	IIVPEKVST	7	984.585	7.71361	0.011983	10000	4.53713	0.117525	64.8162	1.67893
ArnB~P	26	34	IIVPEKVST	7	984.585	7.73184	0.006841	0	0	0	0	0
ArnB~P	26	34	IIVPEKVST	7	984.585	7.73226	0.005113	10	3.83092	0.026846	54.7274	0.383514
ArnB~P	26	34	IIVPEKVST	7	984.585	7.74588	0.003707	30	4.05072	0.022819	57.8674	0.325986
ArnB~P	26	34	IIVPEKVST	7	984.585	7.72389	0.007894	100	3.81691	0.009408	54.5272	0.1344
ArnB~P	26	34	IIVPEKVST	7	984.585	7.7263	0.006533	1000	4.14625	0.045954	59.2322	0.656486
ArnB~P	26	34	IIVPEKVST	7	984.585	7.70043	0.003158	10000	4.50645	0.025866	64.3779	0.369514
ArnA/ArnB~P	26	34	IIVPEKVST	7	984.585	7.72945	0.006386	0	0	0	0	0
ArnA/ArnB~P	26	34	IIVPEKVST	7	984.585	7.72389	0.002573	10	3.79803	0.029083	54.2576	0.415471
ArnA/ArnB~P	26	34	IIVPEKVST	7	984.585	7.73171	0.003821	30	4.01926	0.0382	57.418	0.545714
ArnA/ArnB~P	26	34	IIVPEKVST	7	984.585	7.71206	0.003519	100	3.8649	0.024771	55.2128	0.353871
ArnA/ArnB~P	26	34	IIVPEKVST	7	984.585	7.70597	0.013755	1000	4.03927	0.102705	57.7039	1.46721
ArnA/ArnB~P	26	34	IIVPEKVST	7	984.585	7.70757	0.008849	10000	4.63465	0.086936	66.2092	1.24194
ArnB	28	31	VPEK	2	471.269	7.21772	0.004212	0	0	0	0	0
ArnB	28	31	VPEK	2	471.269	7.24049	0.02553	10	1.11328	0.010817	55.6638	0.54085
ArnB	28	31	VPEK	2	471.269	7.27451	0.015666	30	1.14071	0.011701	57.0357	0.58505
ArnB	28	31	VPEK	2	471.269	7.26272	0.006029	100	1.14342	0.012874	57.1708	0.6437
ArnB	28	31	VPEK	2	471.269	7.27773	0.004467	1000	1.227	0.00818	61.3499	0.409
ArnB	28	31	VPEK	2	471.269	7.25691	0.014003	10000	1.61342	0.008689	80.6709	0.43445
ArnB~P	28	31	VPEK	2	471.269	7.09515	0.013224	0	0	0	0	0
ArnB~P	28	31	VPEK	2	471.269	7.15833	0.053861	10	1.06078	0.005976	53.0392	0.2988
ArnB~P	28	31	VPEK	2	471.269	7.16361	0.042834	30	1.12796	0.005455	56.3978	0.27275
ArnB~P	28	31	VPEK	2	471.269	7.26699	0.019402	100	1.11688	0.006514	55.8438	0.3257
ArnB~P	28	31	VPEK	2	471.269	7.19837	0.032106	1000	1.21703	0.009299	60.8516	0.46495
ArnB~P	28	31	VPEK	2	471.269	7.21876	0.017112	10000	1.56733	0.005366	78.3665	0.2683
ArnA/ArnB~P	28	31	VPEK	2	471.269	7.09913	0.009915	0	0	0	0	0
ArnA/ArnB~P	28	31	VPEK	2	471.269	7.17662	0.0228	10	1.05487	0.015262	52.7435	0.7631
ArnA/ArnB~P	28	31	VPEK	2	471.269	7.21816	0.012099	30	1.13486	0.019446	56.7432	0.9723
ArnA/ArnB~P	28	31	VPEK	2	471.269	7.20929	0.024512	100	1.14586	0.01255	57.2928	0.6275
ArnA/ArnB~P	28	31	VPEK	2	471.269	7.17775	0.004606	1000	1.25325	0.012677	62.6623	0.63385
ArnA/ArnB~P	28	31	VPEK	2	471.269	7.23619	0.014643	10000	1.62628	0.01223	81.3141	0.6115
ArnB	32	43	VSTARGFHYIIL	11	1375.76	9.79721	0.015531	0	0	0	0	0
ArnB	32	43	VSTARGFHYIIL	11	1375.76	9.82232	0.010296	10	1.91458	0.017982	17.4053	0.163473
ArnB	32	43	VSTARGFHYIIL	11	1375.76	9.87018	0.014299	30	2.04101	0.015631	18.5546	0.1421
ArnB	32	43	VSTARGFHYIIL	11	1375.76	9.85414	0.008799	100	2.05213	0.017759	18.6558	0.161445
ArnB	32	43	VSTARGFHYIIL	11	1375.76	9.84866	0.03145	1000	2.08514	0.016902	18.9558	0.153655
ArnB	32	43	VSTARGFHYIIL	11	1375.76	9.83885	0.001925	10000	2.21628	0.017945	20.148	0.163136
ArnB~P	32	43	VSTARGFHYIIL	11	1375.76	9.7983	0.006427	0	0	0	0	0
ArnB~P	32	43	VSTARGFHYIIL	11	1375.76	9.77332	0.013814	10	2.05141	0.01965	18.6492	0.178636
ArnB~P	32	43	VSTARGFHYIIL	11	1375.76	9.78666	0.015754	30	2.15158	0.037785	19.5599	0.3435
ArnB~P	32	43	VSTARGFHYIIL	11	1375.76	9.7679	0.023989	100	2.17988	0.010596	19.8171	0.0963273
ArnB~P	32	43	VSTARGFHYIIL	11	1375.76	9.78743	0.060424	1000	2.37803	0.00248	21.6185	0.0225455
ArnB~P	32	43	VSTARGFHYIIL	11	1375.76	9.82639	0.025021	10000	2.42309	0.006431	22.0281	0.0584636
ArnA/ArnB~P	32	43	VSTARGFHYIIL	11	1375.76	9.76286	0.014379	0	0	0	0	0
ArnA/ArnB~P	32	43	VSTARGFHYIIL	11	1375.76	9.78012	0.010381	10	2.06615	0.013017	18.7831	0.118336
ArnA/ArnB~P	32	43	VSTARGFHYIIL	11	1375.76	9.80241	0.017332	30	2.142	0.015946	19.4727	0.144964
ArnA/ArnB~P	32	43	VSTARGFHYIIL	11	1375.76	9.79038	0.00929	100	2.22834	0.015846	20.2577	0.144055
ArnA/ArnB~P	32	43	VSTARGFHYIIL	11	1375.76	9.81355	0.015393	1000	2.41681	0.012657	21.971	0.115064
ArnA/ArnB~P	32	43	VSTARGFHYIIL	11	1375.76	9.80753	0.019846	10000	2.43852	0.012521	22.1684	0.113827
ArnB	37	43	GFHYIIL	6	861.474	10.4305	0.015786	0	0	0	0	0
ArnB	37	43	GFHYIIL	6	861.474	10.4412	0.00413	10	-0.006726	0.022038	-0.1121	0.3673
ArnB	37	43	GFHYIIL	6	861.474	10.4908	0.018096	30	-0.014279	0.017515	-0.237983	0.291917
ArnB	37	43	GFHYIIL	6	861.474	10.4775	0.007221	100	-0.002181	0.012338	-0.03635	0.205633
ArnB	37	43	GFHYIIL	6	861.474	10.478	0.013306	1000	-0.014066	0.009187	-0.234433	0.153117
ArnB	37	43	GFHYIIL	6	861.474	10.468	0.009697	10000	-0.006622	0.011308	-0.110367	0.188467
ArnB~P	37	43	GFHYIIL	6	861.474	10.453	0.016665	0	0	0	0	0
ArnB~P	37	43	GFHYIIL	6	861.474	10.4061	0.009247	10	0.007159	0.008158	0.119317	0.135967
ArnB~P	37	43	GFHYIIL	6	861.474	10.4131	0.008585	30	-0.00283	0.006755	-0.0471667	0.112583
ArnB~P	37	43	GFHYIIL	6	861.474	10.3992	0.003	100	-0.010669	0.021393	-0.177817	0.35655
ArnB~P	37	43	GFHYIIL	6	861.474	10.4616	0.018412	1000	-0.007011	0.005863	-0.11685	0.0977167
ArnB~P	37	43	GFHYIIL	6	861.474	10.4762	0.0242	10000	-0.003244	0.012141	-0.0540667	0.20235
ArnA/ArnB~P	37	43	GFHYIIL	6	861.474	10.3961	0.018039	0	0	0	0	0
ArnA/ArnB~P	37	43	GFHYIIL	6	861.474	10.427	0.017234	10	0.065422	0.017374	1.09037	0.289567
ArnA/ArnB~P	37	43	GFHYIIL	6	861.474	10.4213	0.030335	30	0.054161	0.017545	0.902683	0.292417
ArnA/ArnB~P	37	43	GFHYIIL	6	861.474	10.4099	0.018788	100	0.034735	0.020632	0.578917	0.343867
ArnA/ArnB~P	37	43	GFHYIIL	6	861.474	10.4366	0.005824	1000	0.035728	0.018117	0.595467	0.30195
ArnA/ArnB~P	37	43	GFHYIIL	6	861.474	10.4411	0.021897	10000	0.026182	0.016724	0.436367	0.278733
ArnB	39	43	HYIIL	4	657.385	9.51334	0.010128	0	0	0	0	0
ArnB	39	43	HYIIL	4	657.385	9.54396	0.013394	10	0.073086	0.013215	1.82715	0.330375
ArnB	39	43	HYIIL	4	657.385	9.58204	0.01136	30	0.073459	0.007778	1.83647	0.19445
ArnB	39	43	HYIIL	4	657.385	9.56712	0.008245	100	0.078956	0.00915	1.9739	0.22875
ArnB	39	43	HYIIL	4	657.385	9.57101	0.015856	1000	0.080605	0.008278	2.01512	0.20695
ArnB	39	43	HYIIL	4	657.385	9.55099	0.004309	10000	0.088708	0.006207	2.2177	0.155175
ArnB~P	39	43	HYIIL	4	657.385	9.50253	0.008742	0	0	0	0	0
ArnB~P	39	43	HYIIL	4	657.385	9.49904	0.026925	10	0.102072	0.004507	2.5518	0.112675
ArnB~P	39	43	HYIIL	4	657.385	9.52312	0.022733	30	0.103858	0.004562	2.59645	0.11405
ArnB~P	39	43	HYIIL	4	657.385	9.52285	0.010074	100	0.094602	0.013232	2.36505	0.3308
ArnB~P	39	43	HYIIL	4	657.385	9.51857	0.056457	1000	0.086047	0.005737	2.15117	0.143425
ArnB~P	39	43	HYIIL	4	657.385	9.54267	0.01682	10000	0.089737	0.010046	2.24342	0.25115
ArnA/ArnB~P	39	43	HYIIL	4	657.385	9.48495	0.009459	0	0	0	0	0
ArnA/ArnB~P	39	43	HYIIL	4	657.385	9.51138	0.00614	10	0.106867	0.008926	2.67168	0.22315
ArnA/ArnB~P	39	43	HYIIL	4	657.385	9.54195	0.012238	30	0.106423	0.011437	2.66058	0.285925
ArnA/ArnB~P	39	43	HYIIL	4	657.385	9.52377	0.024065	100	0.089245	0.006646	2.23113	0.16615
ArnA/ArnB~P	39	43	HYIIL	4	657.385	9.54229	0.011727	1000	0.085331	0.004638	2.13328	0.11595
ArnA/ArnB~P	39	43	HYIIL	4	657.385	9.52561	0.0095	10000	0.081275	0.010084	2.03187	0.2521
ArnB	40	43	YIIL	3	520.326	10.4854	0.014237	0	0	0	0	0
ArnB	40	43	YIIL	3	520.326	10.499	0.003089	10	0.058622	0.02544	1.95407	0.848
ArnB	40	43	YIIL	3	520.326	10.5429	0.014369	30	0.018114	0.022383	0.6038	0.7461
ArnB	40	43	YIIL	3	520.326	10.5246	0.00601	100	0.022625	0.011439	0.754167	0.3813
ArnB	40	43	YIIL	3	520.326	10.5251	0.014643	1000	0.015037	0.003066	0.501233	0.1022
ArnB	40	43	YIIL	3	520.326	10.5175	0.005582	10000	0.010136	0.013853	0.337867	0.461767
ArnB~P	40	43	YIIL	3	520.326	10.4932	0.01012	0	0	0	0	0
ArnB~P	40	43	YIIL	3	520.326	10.4628	0.011293	10	0.027783	0.03639	0.9261	1.213
ArnB~P	40	43	YIIL	3	520.326	10.4739	0.00917	30	0.044116	0.035065	1.47053	1.16883
ArnB~P	40	43	YIIL	3	520.326	10.4617	0.003568	100	0.042229	0.035452	1.40763	1.18173
ArnB~P	40	43	YIIL	3	520.326	10.5145	0.026971	1000	0.0566	0.035067	1.88667	1.1689
ArnB~P	40	43	YIIL	3	520.326	10.5349	0.022411	10000	0.073427	0.03727	2.44757	1.24233
ArnA/ArnB~P	40	43	YIIL	3	520.326	10.4488	0.014934	0	0	0	0	0
ArnA/ArnB~P	40	43	YIIL	3	520.326	10.4806	0.014443	10	0.058245	0.024985	1.9415	0.832833
ArnA/ArnB~P	40	43	YIIL	3	520.326	10.4833	0.027292	30	0.054197	0.025648	1.80657	0.854933
ArnA/ArnB~P	40	43	YIIL	3	520.326	10.4732	0.012692	100	0.073961	0.024162	2.46537	0.8054
ArnA/ArnB~P	40	43	YIIL	3	520.326	10.5012	0.004413	1000	0.07343	0.023936	2.44767	0.797867
ArnA/ArnB~P	40	43	YIIL	3	520.326	10.4997	0.020383	10000	0.074839	0.023968	2.49463	0.798933
ArnB	44	50	LDTSGSM	6	709.295	7.48693	0.011898	0	0	0	0	0
ArnB	44	50	LDTSGSM	6	709.295	7.48644	0.012439	10	1.28492	0.04332	21.4153	0.722
ArnB	44	50	LDTSGSM	6	709.295	7.46385	0.013536	30	1.35267	0.041953	22.5445	0.699217
ArnB	44	50	LDTSGSM	6	709.295	7.45079	0.012013	100	1.37992	0.040678	22.9987	0.677967
ArnB	44	50	LDTSGSM	6	709.295	7.4552	0.017038	1000	1.45172	0.041039	24.1954	0.683983
ArnB	44	50	LDTSGSM	6	709.295	7.48563	0.011821	10000	1.9173	0.055237	31.955	0.920617
ArnB~P	44	50	LDTSGSM	6	709.295	7.5394	0.007766	0	0	0	0	0
ArnB~P	44	50	LDTSGSM	6	709.295	7.54544	0.002345	10	1.0683	0.026561	17.805	0.442683
ArnB~P	44	50	LDTSGSM	6	709.295	7.55381	0.002539	30	1.24527	0.026912	20.7545	0.448533
ArnB~P	44	50	LDTSGSM	6	709.295	7.53523	0.009005	100	1.32638	0.027761	22.1063	0.462683
ArnB~P	44	50	LDTSGSM	6	709.295	7.52988	0.007615	1000	1.48761	0.032697	24.7935	0.54495
ArnB~P	44	50	LDTSGSM	6	709.295	7.50225	0.007511	10000	1.74997	0.027825	29.1662	0.46375
ArnA/ArnB~P	44	50	LDTSGSM	6	709.295	7.54112	0.007865	0	0	0	0	0
ArnA/ArnB~P	44	50	LDTSGSM	6	709.295	7.53549	0.002454	10	0.928559	0.009329	15.476	0.155483
ArnA/ArnB~P	44	50	LDTSGSM	6	709.295	7.53759	0.005434	30	1.13918	0.014225	18.9863	0.237083
ArnA/ArnB~P	44	50	LDTSGSM	6	709.295	7.51819	0.004207	100	1.23996	0.008482	20.666	0.141367
ArnA/ArnB~P	44	50	LDTSGSM	6	709.295	7.50935	0.011161	1000	1.40293	0.026946	23.3822	0.4491
ArnA/ArnB~P	44	50	LDTSGSM	6	709.295	7.50293	0.008842	10000	1.66203	0.041201	27.7005	0.686683
ArnB	44	51	LDTSGSMY	7	872.358	8.53003	0.010674	0	0	0	0	0
ArnB	44	51	LDTSGSMY	7	872.358	8.53714	0.013173	10	2.36829	0.030235	33.8326	0.431929
ArnB	44	51	LDTSGSMY	7	872.358	8.5673	0.013101	30	2.54129	0.028834	36.3041	0.411914
ArnB	44	51	LDTSGSMY	7	872.358	8.55074	0.007614	100	2.57629	0.018603	36.8042	0.265757
ArnB	44	51	LDTSGSMY	7	872.358	8.56672	0.004842	1000	2.61748	0.011611	37.3925	0.165871
ArnB	44	51	LDTSGSMY	7	872.358	8.55156	0.014116	10000	3.10675	0.021864	44.3822	0.312343
ArnB~P	44	51	LDTSGSMY	7	872.358	8.47722	0.014729	0	0	0	0	0
ArnB~P	44	51	LDTSGSMY	7	872.358	8.50452	0.020312	10	1.91605	0.019256	27.3722	0.275086
ArnB~P	44	51	LDTSGSMY	7	872.358	8.52871	0.031567	30	2.20896	0.026917	31.5566	0.384529
ArnB~P	44	51	LDTSGSMY	7	872.358	8.58072	0.01512	100	2.41162	0.0278	34.4517	0.397143
ArnB~P	44	51	LDTSGSMY	7	872.358	8.53882	0.038866	1000	2.59966	0.013776	37.1379	0.1968
ArnB~P	44	51	LDTSGSMY	7	872.358	8.55997	0.004515	10000	2.84449	0.014971	40.6356	0.213871
ArnA/ArnB~P	44	51	LDTSGSMY	7	872.358	8.46707	0.009735	0	0	0	0	0
ArnA/ArnB~P	44	51	LDTSGSMY	7	872.358	8.51698	0.011719	10	1.73913	0.017875	24.8447	0.255357
ArnA/ArnB~P	44	51	LDTSGSMY	7	872.358	8.55732	0.002545	30	2.04974	0.012916	29.282	0.184514
ArnA/ArnB~P	44	51	LDTSGSMY	7	872.358	8.54215	0.032216	100	2.38859	0.009456	34.1228	0.135086
ArnA/ArnB~P	44	51	LDTSGSMY	7	872.358	8.54599	0.008914	1000	2.6636	0.008868	38.0515	0.126686
ArnA/ArnB~P	44	51	LDTSGSMY	7	872.358	8.54349	0.016712	10000	2.82998	0.01387	40.4282	0.198143
ArnB	55	65	IETAKQGAMEL	10	1189.6	8.59963	0.00773	0	0	0	0	0
ArnB	55	65	IETAKQGAMEL	10	1189.6	8.62248	0.017251	10	0.64381	0.066044	6.4381	0.66044
ArnB	55	65	IETAKQGAMEL	10	1189.6	8.68529	0.001847	30	0.861905	0.050077	8.61905	0.50077
ArnB	55	65	IETAKQGAMEL	10	1189.6	8.65552	0.010004	100	1.71924	0.16629	17.1924	1.6629
ArnB	55	65	IETAKQGAMEL	10	1189.6	8.68	0.007605	1000	4.56958	0.296437	45.6958	2.96437
ArnB	55	65	IETAKQGAMEL	10	1189.6	8.64166	0.01642	10000	5.86191	0.047282	58.6191	0.47282
ArnB~P	55	65	IETAKQGAMEL	10	1189.6	8.55996	0.017831	0	0	0	0	0
ArnB~P	55	65	IETAKQGAMEL	10	1189.6	8.5763	0.015343	10	0.48995	0.026617	4.8995	0.26617
ArnB~P	55	65	IETAKQGAMEL	10	1189.6	8.59205	0.024699	30	0.692346	0.024009	6.92346	0.24009
ArnB~P	55	65	IETAKQGAMEL	10	1189.6	8.63783	0.017965	100	1.19601	0.07834	11.9601	0.7834
ArnB~P	55	65	IETAKQGAMEL	10	1189.6	8.59216	0.034238	1000	3.39125	0.139874	33.9125	1.39874
ArnB~P	55	65	IETAKQGAMEL	10	1189.6	8.60689	0.004708	10000	5.34733	0.02195	53.4733	0.2195
ArnA/ArnB~P	55	65	IETAKQGAMEL	10	1189.6	8.54905	0.016225	0	0	0	0	0
ArnA/ArnB~P	55	65	IETAKQGAMEL	10	1189.6	8.57811	0.007766	10	0.513557	0.019716	5.13557	0.19716
ArnA/ArnB~P	55	65	IETAKQGAMEL	10	1189.6	8.60887	0.002716	30	0.695385	0.021228	6.95385	0.21228
ArnA/ArnB~P	55	65	IETAKQGAMEL	10	1189.6	8.58905	0.032159	100	1.18723	0.061365	11.8723	0.61365
ArnA/ArnB~P	55	65	IETAKQGAMEL	10	1189.6	8.59413	0.006445	1000	3.12116	0.079571	31.2116	0.79571
ArnA/ArnB~P	55	65	IETAKQGAMEL	10	1189.6	8.59163	0.010355	10000	5.31477	0.027191	53.1477	0.27191
ArnB	57	65	TAKQGAMEL	8	947.474	8.37633	0.006385	0	0	0	0	0
ArnB	57	65	TAKQGAMEL	8	947.474	8.41062	0.019806	10	0.386947	0.033421	4.83684	0.417762
ArnB	57	65	TAKQGAMEL	8	947.474	8.46242	0.01667	30	0.474613	0.025038	5.93266	0.312975
ArnB	57	65	TAKQGAMEL	8	947.474	8.44655	0.011785	100	0.945914	0.092345	11.8239	1.15431
ArnB	57	65	TAKQGAMEL	8	947.474	8.46496	0.003607	1000	3.19804	0.240999	39.9755	3.01249
ArnB	57	65	TAKQGAMEL	8	947.474	8.43763	0.015122	10000	4.46068	0.039196	55.7585	0.48995
ArnB~P	57	65	TAKQGAMEL	8	947.474	8.33225	0.01292	0	0	0	0	0
ArnB~P	57	65	TAKQGAMEL	8	947.474	8.35443	0.015259	10	0.372911	0.015644	4.66139	0.19555
ArnB~P	57	65	TAKQGAMEL	8	947.474	8.37107	0.030247	30	0.435189	0.019845	5.43986	0.248063
ArnB~P	57	65	TAKQGAMEL	8	947.474	8.42455	0.017967	100	0.664986	0.041844	8.31232	0.52305
ArnB~P	57	65	TAKQGAMEL	8	947.474	8.37043	0.036028	1000	2.27854	0.100829	28.4818	1.26036
ArnB~P	57	65	TAKQGAMEL	8	947.474	8.38891	0.005474	10000	3.97956	0.010022	49.7445	0.125275
ArnA/ArnB~P	57	65	TAKQGAMEL	8	947.474	8.32434	0.008218	0	0	0	0	0
ArnA/ArnB~P	57	65	TAKQGAMEL	8	947.474	8.35796	0.015746	10	0.367158	0.029421	4.58948	0.367762
ArnA/ArnB~P	57	65	TAKQGAMEL	8	947.474	8.39647	0.003321	30	0.408079	0.02212	5.10099	0.2765
ArnA/ArnB~P	57	65	TAKQGAMEL	8	947.474	8.37596	0.031855	100	0.543988	0.033277	6.79985	0.415963
ArnA/ArnB~P	57	65	TAKQGAMEL	8	947.474	8.3775	0.007385	1000	1.85883	0.056627	23.2353	0.707838
ArnA/ArnB~P	57	65	TAKQGAMEL	8	947.474	8.38096	0.018969	10000	3.75405	0.028614	46.9257	0.357675
ArnB	61	65	GAMEL	4	519.236	9.15072	0.009426	0	0	0	0	0
ArnB	61	65	GAMEL	4	519.236	9.17	0.014017	10	0.16887	0.017412	4.22175	0.4353
ArnB	61	65	GAMEL	4	519.236	9.19518	0.007197	30	0.188575	0.008788	4.71437	0.2197
ArnB	61	65	GAMEL	4	519.236	9.18166	0.006664	100	0.345465	0.009239	8.63663	0.230975
ArnB	61	65	GAMEL	4	519.236	9.19679	0.005169	1000	1.20573	0.097894	30.1432	2.44735
ArnB	61	65	GAMEL	4	519.236	9.16999	0.006534	10000	2.11848	0.037149	52.9619	0.928725
ArnB~P	61	65	GAMEL	4	519.236	9.11596	0.014119	0	0	0	0	0
ArnB~P	61	65	GAMEL	4	519.236	9.12825	0.024026	10	0.127219	0.011167	3.18047	0.279175
ArnB~P	61	65	GAMEL	4	519.236	9.15191	0.027033	30	0.158286	0.010457	3.95715	0.261425
ArnB~P	61	65	GAMEL	4	519.236	9.17632	0.0071	100	0.1961	0.018777	4.9025	0.469425
ArnB~P	61	65	GAMEL	4	519.236	9.15591	0.048498	1000	0.756331	0.024033	18.9083	0.600825
ArnB~P	61	65	GAMEL	4	519.236	9.17573	0.009329	10000	1.69475	0.006943	42.3687	0.173575
ArnA/ArnB~P	61	65	GAMEL	4	519.236	9.10638	0.010366	0	0	0	0	0
ArnA/ArnB~P	61	65	GAMEL	4	519.236	9.1412	0.00643	10	0.136847	0.002846	3.42117	0.07115
ArnA/ArnB~P	61	65	GAMEL	4	519.236	9.17977	0.00568	30	0.14982	0.003917	3.7455	0.097925
ArnA/ArnB~P	61	65	GAMEL	4	519.236	9.15542	0.034015	100	0.206783	0.01184	5.16958	0.296
ArnA/ArnB~P	61	65	GAMEL	4	519.236	9.17397	0.007984	1000	0.68632	0.021749	17.158	0.543725
ArnA/ArnB~P	61	65	GAMEL	4	519.236	9.16431	0.007157	10000	1.67095	0.010415	41.7737	0.260375
ArnB	65	77	LLSRIPEGNKISF	11	1472.83	8.91939	0.004472	0	0	0	0	0
ArnB	65	77	LLSRIPEGNKISF	11	1472.83	8.93608	0.009546	10	2.47882	0.042579	22.5347	0.387082
ArnB	65	77	LLSRIPEGNKISF	11	1472.83	8.93255	0.004031	30	2.61988	0.029664	23.8171	0.269673
ArnB	65	77	LLSRIPEGNKISF	11	1472.83	8.92436	0.009047	100	3.2181	0.034408	29.2555	0.3128
ArnB	65	77	LLSRIPEGNKISF	11	1472.83	8.94128	0.002186	1000	4.86675	0.01637	44.2432	0.148818
ArnB	65	77	LLSRIPEGNKISF	11	1472.83	8.94111	0.014798	10000	6.20815	0.164162	56.4377	1.49238
ArnB~P	65	77	LLSRIPEGNKISF	11	1472.83	8.96104	0.001074	0	0	0	0	0
ArnB~P	65	77	LLSRIPEGNKISF	11	1472.83	8.9636	0.001683	10	2.62331	0.027392	23.8483	0.249018
ArnB~P	65	77	LLSRIPEGNKISF	11	1472.83	8.97161	0.00413	30	3.04481	0.019205	27.68	0.174591
ArnB~P	65	77	LLSRIPEGNKISF	11	1472.83	8.94627	0.008199	100	3.5806	0.01604	32.5509	0.145818
ArnB~P	65	77	LLSRIPEGNKISF	11	1472.83	8.94594	0.009672	1000	6.02564	0.026484	54.7786	0.240764
ArnB~P	65	77	LLSRIPEGNKISF	11	1472.83	8.93153	0.003498	10000	6.29112	0.017806	57.192	0.161873
ArnA/ArnB~P	65	77	LLSRIPEGNKISF	11	1472.83	8.95152	0.004339	0	0	0	0	0
ArnA/ArnB~P	65	77	LLSRIPEGNKISF	11	1472.83	8.94527	0.002605	10	2.64537	0.017946	24.0488	0.163145
ArnA/ArnB~P	65	77	LLSRIPEGNKISF	11	1472.83	8.95127	0.004582	30	3.12859	0.010979	28.4417	0.0998091
ArnA/ArnB~P	65	77	LLSRIPEGNKISF	11	1472.83	8.92435	0.005523	100	3.6467	0.029392	33.1518	0.2672
ArnA/ArnB~P	65	77	LLSRIPEGNKISF	11	1472.83	8.92405	0.015399	1000	5.78578	0.179414	52.598	1.63104
ArnA/ArnB~P	65	77	LLSRIPEGNKISF	11	1472.83	8.92635	0.01153	10000	6.46566	0.222214	58.7787	2.02013
ArnB	66	77	LSRIPEGNKISF	10	1359.75	8.57217	0.004011	0	0	0	0	0
ArnB	66	77	LSRIPEGNKISF	10	1359.75	8.59015	0.007729	10	2.01023	0.012901	20.1023	0.12901
ArnB	66	77	LSRIPEGNKISF	10	1359.75	8.57113	0.006906	30	2.06609	0.013491	20.6609	0.13491
ArnB	66	77	LSRIPEGNKISF	10	1359.75	8.56921	0.010042	100	2.43835	0.018781	24.3835	0.18781
ArnB	66	77	LSRIPEGNKISF	10	1359.75	8.58301	0.002829	1000	3.96101	0.012434	39.6101	0.12434
ArnB	66	77	LSRIPEGNKISF	10	1359.75	8.59321	0.014787	10000	5.22348	0.130134	52.2348	1.30134
ArnB~P	66	77	LSRIPEGNKISF	10	1359.75	8.62061	0.003488	0	0	0	0	0
ArnB~P	66	77	LSRIPEGNKISF	10	1359.75	8.61284	0.007296	10	2.03541	0.019008	20.3541	0.19008
ArnB~P	66	77	LSRIPEGNKISF	10	1359.75	8.63292	0.007676	30	2.24885	0.020436	22.4885	0.20436
ArnB~P	66	77	LSRIPEGNKISF	10	1359.75	8.59176	0.007486	100	2.74268	0.020693	27.4268	0.20693
ArnB~P	66	77	LSRIPEGNKISF	10	1359.75	8.60537	0.00597	1000	4.92799	0.033366	49.2799	0.33366
ArnB~P	66	77	LSRIPEGNKISF	10	1359.75	8.57108	0.002284	10000	5.25495	0.021104	52.5496	0.21104
ArnA/ArnB~P	66	77	LSRIPEGNKISF	10	1359.75	8.61056	0.0044	0	0	0	0	0
ArnA/ArnB~P	66	77	LSRIPEGNKISF	10	1359.75	8.59195	0.005728	10	2.05826	0.007444	20.5826	0.07444
ArnA/ArnB~P	66	77	LSRIPEGNKISF	10	1359.75	8.60913	0.003926	30	2.34155	0.016727	23.4155	0.16727
ArnA/ArnB~P	66	77	LSRIPEGNKISF	10	1359.75	8.57443	0.012666	100	2.82074	0.008187	28.2074	0.08187
ArnA/ArnB~P	66	77	LSRIPEGNKISF	10	1359.75	8.57021	0.019675	1000	4.80523	0.142303	48.0523	1.42303
ArnA/ArnB~P	66	77	LSRIPEGNKISF	10	1359.75	8.57758	0.014269	10000	5.42486	0.161783	54.2486	1.61783
ArnB	66	82	LSRIPEGNKISFLTFSN	15	1922.03	9.66616	0.01068	0	0	0	0	0
ArnB	66	82	LSRIPEGNKISFLTFSN	15	1922.03	9.6877	0.009337	10	2.83103	0.025291	18.8735	0.168607
ArnB	66	82	LSRIPEGNKISFLTFSN	15	1922.03	9.72194	0.012369	30	3.02026	0.013255	20.1351	0.0883667
ArnB	66	82	LSRIPEGNKISFLTFSN	15	1922.03	9.70638	0.006377	100	3.62004	0.017355	24.1336	0.1157
ArnB	66	82	LSRIPEGNKISFLTFSN	15	1922.03	9.69426	0.028884	1000	5.55686	0.018135	37.0457	0.1209
ArnB	66	82	LSRIPEGNKISFLTFSN	15	1922.03	9.69354	0.001431	10000	7.27624	0.021627	48.5083	0.14418
ArnB~P	66	82	LSRIPEGNKISFLTFSN	15	1922.03	9.66165	0.008845	0	0	0	0	0
ArnB~P	66	82	LSRIPEGNKISFLTFSN	15	1922.03	9.639	0.02024	10	2.84447	0.024351	18.9631	0.16234
ArnB~P	66	82	LSRIPEGNKISFLTFSN	15	1922.03	9.6581	0.019338	30	3.14174	0.031987	20.9449	0.213247
ArnB~P	66	82	LSRIPEGNKISFLTFSN	15	1922.03	9.64437	0.022353	100	3.88388	0.051907	25.8925	0.346047
ArnB~P	66	82	LSRIPEGNKISFLTFSN	15	1922.03	9.66	0.058312	1000	6.23788	0.028352	41.5859	0.189013
ArnB~P	66	82	LSRIPEGNKISFLTFSN	15	1922.03	9.69846	0.024761	10000	7.394	0.022147	49.2933	0.147647
ArnA/ArnB~P	66	82	LSRIPEGNKISFLTFSN	15	1922.03	9.63414	0.009849	0	0	0	0	0
ArnA/ArnB~P	66	82	LSRIPEGNKISFLTFSN	15	1922.03	9.65846	0.007235	10	2.86987	0.01695	19.1325	0.113
ArnA/ArnB~P	66	82	LSRIPEGNKISFLTFSN	15	1922.03	9.68455	0.013943	30	3.18167	0.007603	21.2111	0.0506867
ArnA/ArnB~P	66	82	LSRIPEGNKISFLTFSN	15	1922.03	9.67066	0.012074	100	4.01372	0.032106	26.7581	0.21404
ArnA/ArnB~P	66	82	LSRIPEGNKISFLTFSN	15	1922.03	9.69348	0.015115	1000	6.33335	0.006423	42.2223	0.04282
ArnA/ArnB~P	66	82	LSRIPEGNKISFLTFSN	15	1922.03	9.6848	0.017131	10000	7.46416	0.00672	49.7611	0.0448
ArnB	66	85	LSRIPEGNKISFLTFSNNVN	18	2249.18	9.59857	0.009198	0	0	0	0	0
ArnB	66	85	LSRIPEGNKISFLTFSNNVN	18	2249.18	9.61085	0.00762	10	4.68825	0.037092	26.0459	0.206067
ArnB	66	85	LSRIPEGNKISFLTFSNNVN	18	2249.18	9.6446	0.012767	30	4.96316	0.070819	27.5731	0.393439
ArnB	66	85	LSRIPEGNKISFLTFSNNVN	18	2249.18	9.62847	0.007277	100	5.78949	0.045977	32.1639	0.255428
ArnB	66	85	LSRIPEGNKISFLTFSNNVN	18	2249.18	9.62065	0.029154	1000	7.99588	0.054201	44.4216	0.301117
ArnB	66	85	LSRIPEGNKISFLTFSNNVN	18	2249.18	9.61567	0.001809	10000	9.69686	0.047659	53.8714	0.264772
ArnB~P	66	85	LSRIPEGNKISFLTFSNNVN	18	2249.18	9.59168	0.002908	0	0	0	0	0
ArnB~P	66	85	LSRIPEGNKISFLTFSNNVN	18	2249.18	9.56526	0.024383	10	4.65443	0.023378	25.8579	0.129878
ArnB~P	66	85	LSRIPEGNKISFLTFSNNVN	18	2249.18	9.58864	0.021481	30	5.06597	0.044758	28.1443	0.248656
ArnB~P	66	85	LSRIPEGNKISFLTFSNNVN	18	2249.18	9.57997	0.020585	100	5.93512	0.076613	32.9729	0.425628
ArnB~P	66	85	LSRIPEGNKISFLTFSNNVN	18	2249.18	9.59427	0.059017	1000	8.65771	0.017747	48.0984	0.0985944
ArnB~P	66	85	LSRIPEGNKISFLTFSNNVN	18	2249.18	9.6276	0.023621	10000	9.76807	0.017287	54.267	0.0960389
ArnA/ArnB~P	66	85	LSRIPEGNKISFLTFSNNVN	18	2249.18	9.56877	0.01249	0	0	0	0	0
ArnA/ArnB~P	66	85	LSRIPEGNKISFLTFSNNVN	18	2249.18	9.59027	0.009361	10	4.64435	0.021831	25.8019	0.121283
ArnA/ArnB~P	66	85	LSRIPEGNKISFLTFSNNVN	18	2249.18	9.61749	0.0143	30	5.03119	0.029079	27.9511	0.16155
ArnA/ArnB~P	66	85	LSRIPEGNKISFLTFSNNVN	18	2249.18	9.60191	0.013449	100	6.01617	0.028855	33.4232	0.160306
ArnA/ArnB~P	66	85	LSRIPEGNKISFLTFSNNVN	18	2249.18	9.62694	0.015663	1000	8.73733	0.014303	48.5407	0.0794611
ArnA/ArnB~P	66	85	LSRIPEGNKISFLTFSNNVN	18	2249.18	9.61269	0.01482	10000	9.86001	0.028714	54.7778	0.159522
ArnB	71	77	EGNKISF	6	793.397	8.63016	0.006578	0	0	0	0	0
ArnB	71	77	EGNKISF	6	793.397	8.66314	0.020605	10	0.50233	0.004758	8.37217	0.0793
ArnB	71	77	EGNKISF	6	793.397	8.71269	0.000661	30	0.59862	0.004732	9.977	0.0788667
ArnB	71	77	EGNKISF	6	793.397	8.69862	0.006105	100	0.952289	0.022031	15.8715	0.367183
ArnB	71	77	EGNKISF	6	793.397	8.71165	0.005586	1000	2.22656	0.036696	37.1093	0.6116
ArnB	71	77	EGNKISF	6	793.397	8.691	0.009865	10000	2.56862	0.00697	42.8103	0.116167
ArnB~P	71	77	EGNKISF	6	793.397	8.59741	0.013161	0	0	0	0	0
ArnB~P	71	77	EGNKISF	6	793.397	8.60998	0.016885	10	0.486449	0.014602	8.10748	0.243367
ArnB~P	71	77	EGNKISF	6	793.397	8.63074	0.027942	30	0.622992	0.012109	10.3832	0.201817
ArnB~P	71	77	EGNKISF	6	793.397	8.68057	0.01791	100	1.01562	0.020257	16.927	0.337617
ArnB~P	71	77	EGNKISF	6	793.397	8.634	0.044317	1000	2.33915	0.011704	38.9858	0.195067
ArnB~P	71	77	EGNKISF	6	793.397	8.65258	0.0061	10000	2.51918	0.013372	41.9863	0.222867
ArnA/ArnB~P	71	77	EGNKISF	6	793.397	8.58716	0.009265	0	0	0	0	0
ArnA/ArnB~P	71	77	EGNKISF	6	793.397	8.6158	0.0062	10	0.541321	0.015793	9.02202	0.263217
ArnA/ArnB~P	71	77	EGNKISF	6	793.397	8.65853	0.002116	30	0.650997	0.010416	10.85	0.1736
ArnA/ArnB~P	71	77	EGNKISF	6	793.397	8.63559	0.038581	100	1.07931	0.02649	17.9886	0.4415
ArnA/ArnB~P	71	77	EGNKISF	6	793.397	8.64107	0.009109	1000	2.36659	0.013359	39.4432	0.22265
ArnA/ArnB~P	71	77	EGNKISF	6	793.397	8.63707	0.014784	10000	2.56085	0.009352	42.6808	0.155867
ArnB	72	77	GNKISF	5	664.354	8.54076	0.007843	0	0	0	0	0
ArnB	72	77	GNKISF	5	664.354	8.56642	0.016877	10	0.173991	0.0197	3.47982	0.394
ArnB	72	77	GNKISF	5	664.354	8.61404	0.005134	30	0.255776	0.0199	5.11552	0.398
ArnB	72	77	GNKISF	5	664.354	8.5993	0.009006	100	0.627553	0.015298	12.5511	0.30596
ArnB	72	77	GNKISF	5	664.354	8.61485	0.004765	1000	1.84029	0.013639	36.8058	0.27278
ArnB	72	77	GNKISF	5	664.354	8.59268	0.011577	10000	2.16363	0.021954	43.2725	0.43908
ArnB~P	72	77	GNKISF	5	664.354	8.49918	0.016146	0	0	0	0	0
ArnB~P	72	77	GNKISF	5	664.354	8.52066	0.016591	10	0.190874	0.010583	3.81748	0.21166
ArnB~P	72	77	GNKISF	5	664.354	8.53838	0.028225	30	0.305704	0.007784	6.11408	0.15568
ArnB~P	72	77	GNKISF	5	664.354	8.58321	0.014309	100	0.678156	0.042143	13.5631	0.84286
ArnB~P	72	77	GNKISF	5	664.354	8.53616	0.038012	1000	1.97206	0.016142	39.4411	0.32284
ArnB~P	72	77	GNKISF	5	664.354	8.55785	0.005202	10000	2.13166	0.008145	42.6332	0.1629
ArnA/ArnB~P	72	77	GNKISF	5	664.354	8.49064	0.010926	0	0	0	0	0
ArnA/ArnB~P	72	77	GNKISF	5	664.354	8.52719	0.010461	10	0.227608	0.00676	4.55216	0.1352
ArnA/ArnB~P	72	77	GNKISF	5	664.354	8.56598	0.000987	30	0.333221	0.006235	6.66442	0.1247
ArnA/ArnB~P	72	77	GNKISF	5	664.354	8.54298	0.032867	100	0.742644	0.028297	14.8529	0.56594
ArnA/ArnB~P	72	77	GNKISF	5	664.354	8.54852	0.007944	1000	1.9913	0.008225	39.8259	0.1645
ArnA/ArnB~P	72	77	GNKISF	5	664.354	8.54488	0.014014	10000	2.15691	0.006728	43.1382	0.13456
ArnB	72	78	GNKISFL	6	777.438	9.53366	0.008318	0	0	0	0	0
ArnB	72	78	GNKISFL	6	777.438	9.55951	0.011419	10	0.190635	0.008367	3.17725	0.13945
ArnB	72	78	GNKISFL	6	777.438	9.59442	0.012202	30	0.236358	0.017111	3.9393	0.285183
ArnB	72	78	GNKISFL	6	777.438	9.58156	0.008145	100	0.618634	0.036705	10.3106	0.61175
ArnB	72	78	GNKISFL	6	777.438	9.58235	0.018671	1000	1.86044	0.02039	31.0074	0.339833
ArnB	72	78	GNKISFL	6	777.438	9.56564	0.002995	10000	2.12754	0.009766	35.4589	0.162767
ArnB~P	72	78	GNKISFL	6	777.438	9.52196	0.00976	0	0	0	0	0
ArnB~P	72	78	GNKISFL	6	777.438	9.51078	0.025963	10	0.217362	0.013506	3.6227	0.2251
ArnB~P	72	78	GNKISFL	6	777.438	9.53578	0.021341	30	0.312789	0.00901	5.21315	0.150167
ArnB~P	72	78	GNKISFL	6	777.438	9.53454	0.012465	100	0.706874	0.028947	11.7812	0.48245
ArnB~P	72	78	GNKISFL	6	777.438	9.53621	0.05683	1000	1.9646	0.010436	32.7433	0.173933
ArnB~P	72	78	GNKISFL	6	777.438	9.56172	0.018202	10000	2.1284	0.009486	35.4734	0.1581
ArnA/ArnB~P	72	78	GNKISFL	6	777.438	9.49842	0.008721	0	0	0	0	0
ArnA/ArnB~P	72	78	GNKISFL	6	777.438	9.52886	0.005581	10	0.224377	0.011757	3.73962	0.19595
ArnA/ArnB~P	72	78	GNKISFL	6	777.438	9.55801	0.011996	30	0.331501	0.005822	5.52502	0.0970333
ArnA/ArnB~P	72	78	GNKISFL	6	777.438	9.54315	0.020921	100	0.713405	0.026619	11.8901	0.44365
ArnA/ArnB~P	72	78	GNKISFL	6	777.438	9.56396	0.01378	1000	1.98049	0.00993	33.0082	0.1655
ArnA/ArnB~P	72	78	GNKISFL	6	777.438	9.5474	0.01277	10000	2.13107	0.006491	35.5178	0.108183
ArnB	74	80	KISFLTF	6	854.49	10.5289	0.018708	0	0	0	0	0
ArnB	74	80	KISFLTF	6	854.49	10.5327	0.008608	10	0.113005	0.009243	1.88342	0.15405
ArnB	74	80	KISFLTF	6	854.49	10.5767	0.015391	30	0.121732	0.011048	2.02887	0.184133
ArnB	74	80	KISFLTF	6	854.49	10.566	0.005786	100	0.27669	0.006713	4.6115	0.111883
ArnB	74	80	KISFLTF	6	854.49	10.5665	0.009502	1000	0.937949	0.01595	15.6325	0.265833
ArnB	74	80	KISFLTF	6	854.49	10.5571	0.009914	10000	1.54747	0.020011	25.7912	0.333517
ArnB~P	74	80	KISFLTF	6	854.49	10.5456	0.01926	0	0	0	0	0
ArnB~P	74	80	KISFLTF	6	854.49	10.4949	0.009835	10	0.117076	0.008868	1.95127	0.1478
ArnB~P	74	80	KISFLTF	6	854.49	10.5084	0.0126	30	0.151681	0.010331	2.52802	0.172183
ArnB~P	74	80	KISFLTF	6	854.49	10.4931	0.00672	100	0.281167	0.01336	4.68612	0.222667
ArnB~P	74	80	KISFLTF	6	854.49	10.5584	0.016328	1000	0.959959	0.010756	15.9993	0.179267
ArnB~P	74	80	KISFLTF	6	854.49	10.5662	0.022449	10000	1.58655	0.008878	26.4424	0.147967
ArnA/ArnB~P	74	80	KISFLTF	6	854.49	10.4776	0.015656	0	0	0	0	0
ArnA/ArnB~P	74	80	KISFLTF	6	854.49	10.519	0.01716	10	0.145447	0.009247	2.42412	0.154117
ArnA/ArnB~P	74	80	KISFLTF	6	854.49	10.5078	0.034055	30	0.182272	0.009593	3.03787	0.159883
ArnA/ArnB~P	74	80	KISFLTF	6	854.49	10.497	0.022416	100	0.307673	0.012879	5.12788	0.21465
ArnA/ArnB~P	74	80	KISFLTF	6	854.49	10.5248	0.010691	1000	1.00119	0.011574	16.6866	0.1929
ArnA/ArnB~P	74	80	KISFLTF	6	854.49	10.5371	0.022481	10000	1.6625	0.009875	27.7082	0.164583
ArnB	77	82	FLTFSN	5	727.354	9.76897	0.009951	0	0	0	0	0
ArnB	77	82	FLTFSN	5	727.354	9.78135	0.004668	10	0.767659	0.007317	15.3532	0.14634
ArnB	77	82	FLTFSN	5	727.354	9.80307	0.011073	30	0.868225	0.007812	17.3645	0.15624
ArnB	77	82	FLTFSN	5	727.354	9.79015	0.005564	100	1.09891	0.020005	21.9781	0.4001
ArnB	77	82	FLTFSN	5	727.354	9.78403	0.018794	1000	1.45627	0.014377	29.1254	0.28754
ArnB	77	82	FLTFSN	5	727.354	9.77895	0.00126	10000	2.03079	0.010111	40.6158	0.20222
ArnB~P	77	82	FLTFSN	5	727.354	9.76048	0.007819	0	0	0	0	0
ArnB~P	77	82	FLTFSN	5	727.354	9.74506	0.020704	10	0.72214	0.013148	14.4428	0.26296
ArnB~P	77	82	FLTFSN	5	727.354	9.76791	0.018032	30	0.833201	0.014333	16.664	0.28666
ArnB~P	77	82	FLTFSN	5	727.354	9.75752	0.017681	100	1.06791	0.022197	21.3581	0.44394
ArnB~P	77	82	FLTFSN	5	727.354	9.7788	0.058983	1000	1.45494	0.013706	29.0989	0.27412
ArnB~P	77	82	FLTFSN	5	727.354	9.8087	0.023311	10000	2.03197	0.014117	40.6395	0.28234
ArnA/ArnB~P	77	82	FLTFSN	5	727.354	9.73176	0.010867	0	0	0	0	0
ArnA/ArnB~P	77	82	FLTFSN	5	727.354	9.76032	0.009229	10	0.74994	0.010664	14.9988	0.21328
ArnA/ArnB~P	77	82	FLTFSN	5	727.354	9.78684	0.015026	30	0.855527	0.00999	17.1105	0.1998
ArnA/ArnB~P	77	82	FLTFSN	5	727.354	9.77327	0.013729	100	1.11012	0.012043	22.2023	0.24086
ArnA/ArnB~P	77	82	FLTFSN	5	727.354	9.79862	0.013827	1000	1.49811	0.011585	29.9622	0.2317
ArnA/ArnB~P	77	82	FLTFSN	5	727.354	9.78512	0.015526	10000	2.0933	0.0156	41.866	0.312
ArnB	78	82	LTFSN	4	580.285	8.29129	0.005062	0	0	0	0	0
ArnB	78	82	LTFSN	4	580.285	8.30204	0.01791	10	0.746267	0.008535	18.6567	0.213375
ArnB	78	82	LTFSN	4	580.285	8.3269	0.019048	30	0.825608	0.006962	20.6402	0.17405
ArnB	78	82	LTFSN	4	580.285	8.31172	0.007892	100	1.06419	0.022511	26.6047	0.562775
ArnB	78	82	LTFSN	4	580.285	8.32972	0.002511	1000	1.40109	0.008144	35.0272	0.2036
ArnB	78	82	LTFSN	4	580.285	8.3116	0.013269	10000	1.89899	0.007109	47.4747	0.177725
ArnB~P	78	82	LTFSN	4	580.285	8.22265	0.016483	0	0	0	0	0
ArnB~P	78	82	LTFSN	4	580.285	8.26181	0.023264	10	0.72432	0.015378	18.108	0.38445
ArnB~P	78	82	LTFSN	4	580.285	8.2842	0.033384	30	0.83464	0.01576	20.866	0.394
ArnB~P	78	82	LTFSN	4	580.285	8.34698	0.018956	100	1.05226	0.024543	26.3064	0.613575
ArnB~P	78	82	LTFSN	4	580.285	8.29613	0.035447	1000	1.41682	0.018223	35.4206	0.455575
ArnB~P	78	82	LTFSN	4	580.285	8.31928	0.004437	10000	1.87858	0.014273	46.9645	0.356825
ArnA/ArnB~P	78	82	LTFSN	4	580.285	8.22459	0.007937	0	0	0	0	0
ArnA/ArnB~P	78	82	LTFSN	4	580.285	8.27816	0.017752	10	0.753696	0.004124	18.8424	0.1031
ArnA/ArnB~P	78	82	LTFSN	4	580.285	8.32161	0.005204	30	0.850376	0.002871	21.2594	0.071775
ArnA/ArnB~P	78	82	LTFSN	4	580.285	8.30954	0.031963	100	1.09817	0.012818	27.4541	0.32045
ArnA/ArnB~P	78	82	LTFSN	4	580.285	8.3071	0.008012	1000	1.4484	0.006202	36.2099	0.15505
ArnA/ArnB~P	78	82	LTFSN	4	580.285	8.31568	0.018073	10000	1.92674	0.012615	48.1684	0.315375
ArnB	81	87	SNNVNIL	6	772.407	9.14818	0.009317	0	0	0	0	0
ArnB	81	87	SNNVNIL	6	772.407	9.16517	0.01074	10	2.40665	0.02809	40.1108	0.468167
ArnB	81	87	SNNVNIL	6	772.407	9.1857	0.00651	30	2.43667	0.013335	40.6111	0.22225
ArnB	81	87	SNNVNIL	6	772.407	9.17404	0.008132	100	2.67039	0.029201	44.5065	0.486683
ArnB	81	87	SNNVNIL	6	772.407	9.1873	0.005111	1000	3.41325	0.030186	56.8875	0.5031
ArnB	81	87	SNNVNIL	6	772.407	9.1608	0.006291	10000	3.71152	0.016621	61.8587	0.277017
ArnB~P	81	87	SNNVNIL	6	772.407	9.11286	0.01491	0	0	0	0	0
ArnB~P	81	87	SNNVNIL	6	772.407	9.12951	0.025617	10	2.41019	0.020001	40.1698	0.33335
ArnB~P	81	87	SNNVNIL	6	772.407	9.15319	0.026853	30	2.45766	0.045183	40.9611	0.75305
ArnB~P	81	87	SNNVNIL	6	772.407	9.174	0.006513	100	2.6544	0.018568	44.2399	0.309467
ArnB~P	81	87	SNNVNIL	6	772.407	9.15562	0.050166	1000	3.41098	0.018237	56.8497	0.30395
ArnB~P	81	87	SNNVNIL	6	772.407	9.17753	0.008163	10000	3.71368	0.011733	61.8946	0.19555
ArnA/ArnB~P	81	87	SNNVNIL	6	772.407	9.10672	0.010252	0	0	0	0	0
ArnA/ArnB~P	81	87	SNNVNIL	6	772.407	9.14451	0.006374	10	2.40149	0.013192	40.0248	0.219867
ArnA/ArnB~P	81	87	SNNVNIL	6	772.407	9.18306	0.005767	30	2.48177	0.010659	41.3628	0.17765
ArnA/ArnB~P	81	87	SNNVNIL	6	772.407	9.15726	0.033225	100	2.6414	0.008795	44.0233	0.146583
ArnA/ArnB~P	81	87	SNNVNIL	6	772.407	9.17773	0.008075	1000	3.38319	0.012485	56.3866	0.208083
ArnA/ArnB~P	81	87	SNNVNIL	6	772.407	9.16588	0.006889	10000	3.71814	0.00682	61.9689	0.113667
ArnB	83	87	NVNIL	4	571.332	9.36699	0.008978	0	0	0	0	0
ArnB	83	87	NVNIL	4	571.332	9.38734	0.009445	10	0.702405	0.009656	17.5601	0.2414
ArnB	83	87	NVNIL	4	571.332	9.41234	0.007574	30	0.768466	0.014317	19.2116	0.357925
ArnB	83	87	NVNIL	4	571.332	9.39693	0.005853	100	1.02853	0.014361	25.7132	0.359025
ArnB	83	87	NVNIL	4	571.332	9.40298	0.004895	1000	1.77985	0.017131	44.4963	0.428275
ArnB	83	87	NVNIL	4	571.332	9.38178	0.004188	10000	2.07705	0.010548	51.9263	0.2637
ArnB~P	83	87	NVNIL	4	571.332	9.34113	0.012259	0	0	0	0	0
ArnB~P	83	87	NVNIL	4	571.332	9.35228	0.027276	10	0.676482	0.006361	16.9121	0.159025
ArnB~P	83	87	NVNIL	4	571.332	9.37834	0.022076	30	0.762558	0.005344	19.0639	0.1336
ArnB~P	83	87	NVNIL	4	571.332	9.3881	0.006007	100	0.963953	0.015665	24.0988	0.391625
ArnB~P	83	87	NVNIL	4	571.332	9.37769	0.052174	1000	1.72796	0.01593	43.199	0.39825
ArnB~P	83	87	NVNIL	4	571.332	9.39842	0.013409	10000	2.05166	0.007831	51.2914	0.195775
ArnA/ArnB~P	83	87	NVNIL	4	571.332	9.3196	0.008538	0	0	0	0	0
ArnA/ArnB~P	83	87	NVNIL	4	571.332	9.36211	0.005642	10	0.71383	0.008201	17.8457	0.205025
ArnA/ArnB~P	83	87	NVNIL	4	571.332	9.39078	0.009369	30	0.783376	0.008317	19.5844	0.207925
ArnA/ArnB~P	83	87	NVNIL	4	571.332	9.3765	0.02533	100	0.972802	0.013796	24.32	0.3449
ArnA/ArnB~P	83	87	NVNIL	4	571.332	9.39205	0.008145	1000	1.74337	0.012513	43.5844	0.312825
ArnA/ArnB~P	83	87	NVNIL	4	571.332	9.38063	0.009209	10000	2.10203	0.009372	52.5506	0.2343
ArnB	86	90	ILSEY	4	623.316	8.60115	0.005966	0	0	0	0	0
ArnB	86	90	ILSEY	4	623.316	8.60722	0.012246	10	1.87925	0.026428	46.9814	0.6607
ArnB	86	90	ILSEY	4	623.316	8.64926	0.006663	30	2.04722	0.024611	51.1804	0.615275
ArnB	86	90	ILSEY	4	623.316	8.62634	0.011021	100	2.06555	0.013151	51.6388	0.328775
ArnB	86	90	ILSEY	4	623.316	8.64821	0.005309	1000	2.05086	0.012419	51.2715	0.310475
ArnB	86	90	ILSEY	4	623.316	8.62443	0.016197	10000	1.99794	0.040402	49.9484	1.01005
ArnB~P	86	90	ILSEY	4	623.316	8.55253	0.017945	0	0	0	0	0
ArnB~P	86	90	ILSEY	4	623.316	8.57455	0.018035	10	1.87006	0.05924	46.7515	1.481
ArnB~P	86	90	ILSEY	4	623.316	8.59288	0.027514	30	2.0301	0.061485	50.7525	1.53712
ArnB~P	86	90	ILSEY	4	623.316	8.64764	0.020906	100	2.00577	0.058353	50.1443	1.45883
ArnB~P	86	90	ILSEY	4	623.316	8.6022	0.039099	1000	2.01304	0.058432	50.3261	1.4608
ArnB~P	86	90	ILSEY	4	623.316	8.61789	0.004633	10000	1.9702	0.058539	49.255	1.46348
ArnA/ArnB~P	86	90	ILSEY	4	623.316	8.54538	0.013426	0	0	0	0	0
ArnA/ArnB~P	86	90	ILSEY	4	623.316	8.58715	0.009926	10	1.95457	0.009509	48.8642	0.237725
ArnA/ArnB~P	86	90	ILSEY	4	623.316	8.62165	0.001864	30	2.09184	0.00867	52.296	0.21675
ArnA/ArnB~P	86	90	ILSEY	4	623.316	8.60894	0.032525	100	2.07957	0.008983	51.9892	0.224575
ArnA/ArnB~P	86	90	ILSEY	4	623.316	8.61081	0.005533	1000	2.08715	0.009711	52.1787	0.242775
ArnA/ArnB~P	86	90	ILSEY	4	623.316	8.61143	0.012206	10000	2.02056	0.00936	50.514	0.234
ArnB	86	96	ILSEYADAPSL	9	1177.59	9.51391	0.016578	0	0	0	0	0
ArnB	86	96	ILSEYADAPSL	9	1177.59	9.52369	0.006571	10	4.96702	0.106862	55.1891	1.18736
ArnB	86	96	ILSEYADAPSL	9	1177.59	9.54013	0.010425	30	5.15801	0.023635	57.3112	0.262611
ArnB	86	96	ILSEYADAPSL	9	1177.59	9.52795	0.00662	100	5.0515	0.028354	56.1278	0.315044
ArnB	86	96	ILSEYADAPSL	9	1177.59	9.52975	0.011479	1000	5.08117	0.03916	56.4575	0.435111
ArnB	86	96	ILSEYADAPSL	9	1177.59	9.51691	0.004606	10000	5.03396	0.030869	55.9328	0.342989
ArnB~P	86	96	ILSEYADAPSL	9	1177.59	9.49419	0.008894	0	0	0	0	0
ArnB~P	86	96	ILSEYADAPSL	9	1177.59	9.48313	0.029072	10	4.98702	0.004753	55.4113	0.0528111
ArnB~P	86	96	ILSEYADAPSL	9	1177.59	9.51378	0.021581	30	5.1318	0.042699	57.02	0.474433
ArnB~P	86	96	ILSEYADAPSL	9	1177.59	9.5161	0.009561	100	5.02806	0.036184	55.8673	0.402044
ArnB~P	86	96	ILSEYADAPSL	9	1177.59	9.5185	0.058944	1000	5.0358	0.011957	55.9533	0.132856
ArnB~P	86	96	ILSEYADAPSL	9	1177.59	9.54895	0.017533	10000	4.94918	0.019729	54.9908	0.219211
ArnA/ArnB~P	86	96	ILSEYADAPSL	9	1177.59	9.49346	0.010043	0	0	0	0	0
ArnA/ArnB~P	86	96	ILSEYADAPSL	9	1177.59	9.52663	0.006032	10	4.97548	0.014566	55.2831	0.161844
ArnA/ArnB~P	86	96	ILSEYADAPSL	9	1177.59	9.55731	0.011623	30	5.12637	0.034539	56.9596	0.383767
ArnA/ArnB~P	86	96	ILSEYADAPSL	9	1177.59	9.54045	0.021262	100	5.06425	0.025202	56.2695	0.280022
ArnA/ArnB~P	86	96	ILSEYADAPSL	9	1177.59	9.5654	0.010896	1000	5.05641	0.015503	56.1823	0.172256
ArnA/ArnB~P	86	96	ILSEYADAPSL	9	1177.59	9.55154	0.011667	10000	5.02242	0.021964	55.8046	0.244044
ArnB	88	96	SEYADAPSL	7	951.418	8.88325	0.007012	0	0	0	0	0
ArnB	88	96	SEYADAPSL	7	951.418	8.89105	0.009486	10	4.06093	0.05361	58.0133	0.765857
ArnB	88	96	SEYADAPSL	7	951.418	8.9141	0.005174	30	4.07013	0.033629	58.1447	0.480414
ArnB	88	96	SEYADAPSL	7	951.418	8.9046	0.007132	100	3.97022	0.013574	56.7174	0.193914
ArnB	88	96	SEYADAPSL	7	951.418	8.91931	0.006312	1000	3.93703	0.009488	56.2433	0.135543
ArnB	88	96	SEYADAPSL	7	951.418	8.89649	0.007694	10000	3.90409	0.018858	55.7727	0.2694
ArnB~P	88	96	SEYADAPSL	7	951.418	8.84577	0.014066	0	0	0	0	0
ArnB~P	88	96	SEYADAPSL	7	951.418	8.86162	0.019709	10	3.93712	0.014182	56.2446	0.2026
ArnB~P	88	96	SEYADAPSL	7	951.418	8.88646	0.027781	30	4.02731	0.038017	57.533	0.5431
ArnB~P	88	96	SEYADAPSL	7	951.418	8.91847	0.008285	100	3.95149	0.014836	56.4499	0.211943
ArnB~P	88	96	SEYADAPSL	7	951.418	8.89235	0.044944	1000	3.95319	0.010097	56.4742	0.144243
ArnB~P	88	96	SEYADAPSL	7	951.418	8.91339	0.006293	10000	3.87107	0.011327	55.3009	0.161814
ArnA/ArnB~P	88	96	SEYADAPSL	7	951.418	8.83667	0.01178	0	0	0	0	0
ArnA/ArnB~P	88	96	SEYADAPSL	7	951.418	8.87467	0.004333	10	3.92565	0.016441	56.0807	0.234871
ArnA/ArnB~P	88	96	SEYADAPSL	7	951.418	8.91304	0.004836	30	3.99033	0.010125	57.0047	0.144643
ArnA/ArnB~P	88	96	SEYADAPSL	7	951.418	8.8863	0.036179	100	3.91178	0.009914	55.8826	0.141629
ArnA/ArnB~P	88	96	SEYADAPSL	7	951.418	8.90624	0.007431	1000	3.91157	0.007132	55.8796	0.101886
ArnA/ArnB~P	88	96	SEYADAPSL	7	951.418	8.90122	0.003486	10000	3.86972	0.013877	55.2817	0.198243
ArnB	90	96	YADAPSL	5	735.343	8.98667	0.254912	0	0	0	0	0
ArnB	90	96	YADAPSL	5	735.343	8.7937	0.011852	10	2.59411	0.027595	51.8823	0.5519
ArnB	90	96	YADAPSL	5	735.343	8.82488	0.003308	30	2.59897	0.025905	51.9794	0.5181
ArnB	90	96	YADAPSL	5	735.343	8.80928	0.005891	100	2.54388	0.016745	50.8776	0.3349
ArnB	90	96	YADAPSL	5	735.343	8.82753	0.004926	1000	2.50325	0.01674	50.065	0.3348
ArnB	90	96	YADAPSL	5	735.343	8.80234	0.00953	10000	2.48132	0.014794	49.6265	0.29588
ArnB~P	90	96	YADAPSL	5	735.343	8.74087	0.015656	0	0	0	0	0
ArnB~P	90	96	YADAPSL	5	735.343	8.76269	0.021842	10	2.52504	0.033119	50.5009	0.66238
ArnB~P	90	96	YADAPSL	5	735.343	8.78544	0.030518	30	2.56957	0.02717	51.3915	0.5434
ArnB~P	90	96	YADAPSL	5	735.343	8.82553	0.009156	100	2.50393	0.016816	50.0785	0.33632
ArnB~P	90	96	YADAPSL	5	735.343	8.79309	0.042682	1000	2.52533	0.015573	50.5065	0.31146
ArnB~P	90	96	YADAPSL	5	735.343	8.81415	0.005244	10000	2.47099	0.01516	49.4197	0.3032
ArnA/ArnB~P	90	96	YADAPSL	5	735.343	8.73241	0.012115	0	0	0	0	0
ArnA/ArnB~P	90	96	YADAPSL	5	735.343	8.77424	0.005748	10	2.54946	0.014042	50.9892	0.28084
ArnA/ArnB~P	90	96	YADAPSL	5	735.343	8.81529	0.004426	30	2.54348	0.011124	50.8695	0.22248
ArnA/ArnB~P	90	96	YADAPSL	5	735.343	8.79099	0.034427	100	2.49607	0.016084	49.9213	0.32168
ArnA/ArnB~P	90	96	YADAPSL	5	735.343	8.80342	0.006132	1000	2.51218	0.011344	50.2436	0.22688
ArnA/ArnB~P	90	96	YADAPSL	5	735.343	8.7999	0.008317	10000	2.48139	0.012726	49.6278	0.25452
ArnB	97	111	VQQIKQIRSGGQTVL	14	1653.95	7.88963	0.006703	0	0	0	0	0
ArnB	97	111	VQQIKQIRSGGQTVL	14	1653.95	7.91257	0.026391	10	8.89958	0.130728	63.5684	0.933771
ArnB	97	111	VQQIKQIRSGGQTVL	14	1653.95	7.96821	0.023275	30	9.14067	0.056738	65.2905	0.405271
ArnB	97	111	VQQIKQIRSGGQTVL	14	1653.95	7.94907	0.00676	100	9.12839	0.016116	65.2028	0.115114
ArnB	97	111	VQQIKQIRSGGQTVL	14	1653.95	7.97055	0.003525	1000	9.56708	0.033578	68.3363	0.239843
ArnB	97	111	VQQIKQIRSGGQTVL	14	1653.95	7.94509	0.013327	10000	9.49868	0.036094	67.8477	0.257814
ArnB~P	97	111	VQQIKQIRSGGQTVL	14	1653.95	7.82831	0.014588	0	0	0	0	0
ArnB~P	97	111	VQQIKQIRSGGQTVL	14	1653.95	7.85686	0.016249	10	8.64217	0.027743	61.7298	0.198164
ArnB~P	97	111	VQQIKQIRSGGQTVL	14	1653.95	7.87512	0.031472	30	9.05904	0.092783	64.7074	0.662736
ArnB~P	97	111	VQQIKQIRSGGQTVL	14	1653.95	7.91686	0.017389	100	9.22287	0.021628	65.8776	0.154486
ArnB~P	97	111	VQQIKQIRSGGQTVL	14	1653.95	7.86953	0.031658	1000	9.52633	0.027166	68.0452	0.194043
ArnB~P	97	111	VQQIKQIRSGGQTVL	14	1653.95	7.88795	0.004159	10000	9.34686	0.031971	66.7633	0.228364
ArnA/ArnB~P	97	111	VQQIKQIRSGGQTVL	14	1653.95	7.81792	0.006371	0	0	0	0	0
ArnA/ArnB~P	97	111	VQQIKQIRSGGQTVL	14	1653.95	7.85911	0.018291	10	8.45108	0.043873	60.3648	0.313379
ArnA/ArnB~P	97	111	VQQIKQIRSGGQTVL	14	1653.95	7.894	0.003593	30	8.99806	0.018899	64.2719	0.134993
ArnA/ArnB~P	97	111	VQQIKQIRSGGQTVL	14	1653.95	7.87932	0.030222	100	9.21017	0.015648	65.787	0.111771
ArnA/ArnB~P	97	111	VQQIKQIRSGGQTVL	14	1653.95	7.87239	0.011504	1000	9.47308	0.030075	67.6648	0.214821
ArnA/ArnB~P	97	111	VQQIKQIRSGGQTVL	14	1653.95	7.8861	0.015912	10000	9.37141	0.008196	66.9386	0.0585429
ArnB	100	112	IKQIRSGGQTVLY	12	1461.83	8.06118	0.005438	0	0	0	0	0
ArnB	100	112	IKQIRSGGQTVLY	12	1461.83	8.09405	0.026268	10	6.84019	0.111541	57.0016	0.929508
ArnB	100	112	IKQIRSGGQTVLY	12	1461.83	8.1602	0.020779	30	6.99034	0.061336	58.2529	0.511133
ArnB	100	112	IKQIRSGGQTVLY	12	1461.83	8.13867	0.009577	100	7.00455	0.020585	58.3712	0.171542
ArnB	100	112	IKQIRSGGQTVLY	12	1461.83	8.15404	0.00246	1000	7.48531	0.019889	62.3776	0.165742
ArnB	100	112	IKQIRSGGQTVLY	12	1461.83	8.13305	0.01175	10000	7.43618	0.02767	61.9681	0.230583
ArnB~P	100	112	IKQIRSGGQTVLY	12	1461.83	8.00808	0.018531	0	0	0	0	0
ArnB~P	100	112	IKQIRSGGQTVLY	12	1461.83	8.03742	0.009198	10	6.67132	0.028003	55.5944	0.233358
ArnB~P	100	112	IKQIRSGGQTVLY	12	1461.83	8.04354	0.032642	30	6.96313	0.075703	58.0261	0.630858
ArnB~P	100	112	IKQIRSGGQTVLY	12	1461.83	8.09138	0.021911	100	7.07998	0.028761	58.9998	0.239675
ArnB~P	100	112	IKQIRSGGQTVLY	12	1461.83	8.03791	0.033946	1000	7.42913	0.018805	61.9094	0.156708
ArnB~P	100	112	IKQIRSGGQTVLY	12	1461.83	8.05549	0.003784	10000	7.27024	0.021716	60.5853	0.180967
ArnA/ArnB~P	100	112	IKQIRSGGQTVLY	12	1461.83	8.01062	0.008647	0	0	0	0	0
ArnA/ArnB~P	100	112	IKQIRSGGQTVLY	12	1461.83	8.04361	0.014217	10	6.64478	0.029811	55.3731	0.248425
ArnA/ArnB~P	100	112	IKQIRSGGQTVLY	12	1461.83	8.0702	0.003869	30	7.01003	0.019553	58.4169	0.162942
ArnA/ArnB~P	100	112	IKQIRSGGQTVLY	12	1461.83	8.05893	0.029434	100	7.17926	0.019934	59.8271	0.166117
ArnA/ArnB~P	100	112	IKQIRSGGQTVLY	12	1461.83	8.05251	0.004803	1000	7.45862	0.02088	62.1552	0.174
ArnA/ArnB~P	100	112	IKQIRSGGQTVLY	12	1461.83	8.06012	0.017582	10000	7.4187	0.021799	61.8225	0.181658
ArnB	100	113	IKQIRSGGQTVLYR	13	1617.93	7.28536	0.009311	0	0	0	0	0
ArnB	100	113	IKQIRSGGQTVLYR	13	1617.93	7.32765	0.039865	10	7.0002	0.096545	53.8477	0.742654
ArnB	100	113	IKQIRSGGQTVLYR	13	1617.93	7.39176	0.016142	30	7.26944	0.052738	55.9187	0.405677
ArnB	100	113	IKQIRSGGQTVLYR	13	1617.93	7.37775	0.0087	100	7.4535	0.025545	57.3346	0.1965
ArnB	100	113	IKQIRSGGQTVLYR	13	1617.93	7.39162	0.001365	1000	8.29447	0.030326	63.8036	0.233277
ArnB	100	113	IKQIRSGGQTVLYR	13	1617.93	7.37331	0.010269	10000	8.20511	0.010692	63.1163	0.0822462
ArnB~P	100	113	IKQIRSGGQTVLYR	13	1617.93	7.19303	0.011151	0	0	0	0	0
ArnB~P	100	113	IKQIRSGGQTVLYR	13	1617.93	7.23987	0.036581	10	6.74954	0.028586	51.9196	0.219892
ArnB~P	100	113	IKQIRSGGQTVLYR	13	1617.93	7.24609	0.036102	30	7.09207	0.086572	54.5544	0.665938
ArnB~P	100	113	IKQIRSGGQTVLYR	13	1617.93	7.32796	0.031744	100	7.28859	0.072767	56.0661	0.559746
ArnB~P	100	113	IKQIRSGGQTVLYR	13	1617.93	7.26874	0.022126	1000	8.00499	0.053027	61.5768	0.4079
ArnB~P	100	113	IKQIRSGGQTVLYR	13	1617.93	7.27156	0.007935	10000	8.0098	0.034324	61.6138	0.264031
ArnA/ArnB~P	100	113	IKQIRSGGQTVLYR	13	1617.93	7.20567	0.010832	0	0	0	0	0
ArnA/ArnB~P	100	113	IKQIRSGGQTVLYR	13	1617.93	7.26094	0.019338	10	6.71716	0.024797	51.6705	0.190746
ArnA/ArnB~P	100	113	IKQIRSGGQTVLYR	13	1617.93	7.29563	0.006277	30	7.12403	0.037616	54.8002	0.289354
ArnA/ArnB~P	100	113	IKQIRSGGQTVLYR	13	1617.93	7.28702	0.022784	100	7.30684	0.036838	56.2064	0.283369
ArnA/ArnB~P	100	113	IKQIRSGGQTVLYR	13	1617.93	7.26458	0.007894	1000	7.87053	0.03064	60.5426	0.235692
ArnA/ArnB~P	100	113	IKQIRSGGQTVLYR	13	1617.93	7.28543	0.011	10000	8.11912	0.026561	62.4548	0.204315
ArnB	112	116	YRALE	4	650.338	7.22587	0.015671	0	0	0	0	0
ArnB	112	116	YRALE	4	650.338	7.22915	0.009581	10	-0.000531	0.054159	-0.013275	1.35397
ArnB	112	116	YRALE	4	650.338	7.20281	0.014886	30	0.059586	0.01641	1.48965	0.41025
ArnB	112	116	YRALE	4	650.338	7.18923	0.01347	100	0.049515	0.014076	1.23788	0.3519
ArnB	112	116	YRALE	4	650.338	7.19209	0.013246	1000	0.13052	0.013344	3.263	0.3336
ArnB	112	116	YRALE	4	650.338	7.21866	0.011678	10000	0.486228	0.017597	12.1557	0.439925
ArnB~P	112	116	YRALE	4	650.338	7.29649	0.010217	0	0	0	0	0
ArnB~P	112	116	YRALE	4	650.338	7.29492	0.003852	10	0.084011	0.028405	2.10027	0.710125
ArnB~P	112	116	YRALE	4	650.338	7.30642	0.009057	30	-0.055683	0.019847	-1.39208	0.496175
ArnB~P	112	116	YRALE	4	650.338	7.27698	0.007673	100	0.134671	0.02016	3.36678	0.504
ArnB~P	112	116	YRALE	4	650.338	7.27392	0.006513	1000	0.095921	0.047441	2.39803	1.18602
ArnB~P	112	116	YRALE	4	650.338	7.23902	0.007586	10000	0.559585	0.019436	13.9896	0.4859
ArnA/ArnB~P	112	116	YRALE	4	650.338	7.29676	0.006368	0	0	0	0	0
ArnA/ArnB~P	112	116	YRALE	4	650.338	7.28338	0.001921	10	0.13124	0.00528	3.281	0.132
ArnA/ArnB~P	112	116	YRALE	4	650.338	7.28701	0.003876	30	0.005751	0.03138	0.143775	0.7845
ArnA/ArnB~P	112	116	YRALE	4	650.338	7.25984	0.006927	100	0.152858	0.008431	3.82145	0.210775
ArnA/ArnB~P	112	116	YRALE	4	650.338	7.24652	0.013587	1000	0.201263	0.043293	5.03158	1.08232
ArnA/ArnB~P	112	116	YRALE	4	650.338	7.23987	0.010117	10000	0.546213	0.019058	13.6553	0.47645
ArnB	112	118	YRALERA	6	877.476	6.75162	0.024299	0	0	0	0	0
ArnB	112	118	YRALERA	6	877.476	6.74953	0.011051	10	0.077874	0.061893	1.2979	1.03155
ArnB	112	118	YRALERA	6	877.476	6.72521	0.015431	30	0.153529	0.024775	2.55882	0.412917
ArnB	112	118	YRALERA	6	877.476	6.71703	0.006672	100	0.144797	0.013989	2.41328	0.23315
ArnB	112	118	YRALERA	6	877.476	6.71401	0.014593	1000	0.18795	0.019753	3.1325	0.329217
ArnB	112	118	YRALERA	6	877.476	6.72696	0.008656	10000	0.573599	0.025122	9.55998	0.4187
ArnB~P	112	118	YRALERA	6	877.476	6.88232	0.009423	0	0	0	0	0
ArnB~P	112	118	YRALERA	6	877.476	6.8875	0.001347	10	0.188953	0.029189	3.14922	0.486483
ArnB~P	112	118	YRALERA	6	877.476	6.88521	0.002591	30	0.022411	0.018308	0.373517	0.305133
ArnB~P	112	118	YRALERA	6	877.476	6.84704	0.011578	100	0.243814	0.007314	4.06357	0.1219
ArnB~P	112	118	YRALERA	6	877.476	6.8297	0.013076	1000	0.172454	0.072258	2.87423	1.2043
ArnB~P	112	118	YRALERA	6	877.476	6.78064	0.014653	10000	0.700607	0.027252	11.6768	0.4542
ArnA/ArnB~P	112	118	YRALERA	6	877.476	6.89032	0.007547	0	0	0	0	0
ArnA/ArnB~P	112	118	YRALERA	6	877.476	6.8675	0.006741	10	0.202784	0.009919	3.37973	0.165317
ArnA/ArnB~P	112	118	YRALERA	6	877.476	6.86033	0.004546	30	0.074772	0.039498	1.2462	0.6583
ArnA/ArnB~P	112	118	YRALERA	6	877.476	6.8222	0.007582	100	0.208289	0.013281	3.47148	0.22135
ArnA/ArnB~P	112	118	YRALERA	6	877.476	6.80011	0.016207	1000	0.280883	0.040408	4.68138	0.673467
ArnA/ArnB~P	112	118	YRALERA	6	877.476	6.77468	0.008649	10000	0.614185	0.037332	10.2364	0.6222
ArnB	112	120	YRALERAIE	8	1119.6	7.65171	0.005812	0	0	0	0	0
ArnB	112	120	YRALERAIE	8	1119.6	7.66647	0.005106	10	0.095931	0.034412	1.19914	0.43015
ArnB	112	120	YRALERAIE	8	1119.6	7.64853	0.009445	30	0.134818	0.007812	1.68522	0.09765
ArnB	112	120	YRALERAIE	8	1119.6	7.63324	0.01553	100	0.121427	0.015656	1.51784	0.1957
ArnB	112	120	YRALERAIE	8	1119.6	7.63674	0.007559	1000	0.190834	0.007598	2.38543	0.094975
ArnB	112	120	YRALERAIE	8	1119.6	7.6555	0.010105	10000	0.589398	0.014384	7.36747	0.1798
ArnB~P	112	120	YRALERAIE	8	1119.6	7.7383	0.012342	0	0	0	0	0
ArnB~P	112	120	YRALERAIE	8	1119.6	7.74724	0.013601	10	0.224876	0.031978	2.81095	0.399725
ArnB~P	112	120	YRALERAIE	8	1119.6	7.75628	0.005396	30	0.074608	0.029155	0.9326	0.364438
ArnB~P	112	120	YRALERAIE	8	1119.6	7.71032	0.008749	100	0.246778	0.022294	3.08473	0.278675
ArnB~P	112	120	YRALERAIE	8	1119.6	7.70059	0.007994	1000	0.200262	0.064486	2.50327	0.806075
ArnB~P	112	120	YRALERAIE	8	1119.6	7.66134	0.005203	10000	0.669666	0.021541	8.37082	0.269263
ArnA/ArnB~P	112	120	YRALERAIE	8	1119.6	7.73737	0.006769	0	0	0	0	0
ArnA/ArnB~P	112	120	YRALERAIE	8	1119.6	7.72146	0.002076	10	0.23203	0.016201	2.90037	0.202513
ArnA/ArnB~P	112	120	YRALERAIE	8	1119.6	7.7355	0.003482	30	0.154934	0.026063	1.93667	0.325788
ArnA/ArnB~P	112	120	YRALERAIE	8	1119.6	7.68491	0.008097	100	0.272518	0.013056	3.40647	0.1632
ArnA/ArnB~P	112	120	YRALERAIE	8	1119.6	7.67507	0.020019	1000	0.304448	0.027806	3.8056	0.347575
ArnA/ArnB~P	112	120	YRALERAIE	8	1119.6	7.66653	0.01145	10000	0.674841	0.014951	8.43551	0.186888
ArnB	116	133	ERAIEIAKKHDLPGYIIL	16	2078.19	9.13341	0.008802	0	0	0	0	0
ArnB	116	133	ERAIEIAKKHDLPGYIIL	16	2078.19	9.16445	0.014746	10	1.16573	0.014134	7.28579	0.0883375
ArnB	116	133	ERAIEIAKKHDLPGYIIL	16	2078.19	9.21049	0.012272	30	1.64732	0.03703	10.2957	0.231437
ArnB	116	133	ERAIEIAKKHDLPGYIIL	16	2078.19	9.19733	0.010177	100	2.16531	0.055322	13.5332	0.345763
ArnB	116	133	ERAIEIAKKHDLPGYIIL	16	2078.19	9.20915	0.003358	1000	2.20729	0.016569	13.7955	0.103556
ArnB	116	133	ERAIEIAKKHDLPGYIIL	16	2078.19	9.17866	0.007378	10000	2.30483	0.029362	14.4052	0.183512
ArnB~P	116	133	ERAIEIAKKHDLPGYIIL	16	2078.19	9.11623	0.011757	0	0	0	0	0
ArnB~P	116	133	ERAIEIAKKHDLPGYIIL	16	2078.19	9.10533	0.02396	10	1.13994	0.028005	7.1246	0.175031
ArnB~P	116	133	ERAIEIAKKHDLPGYIIL	16	2078.19	9.12654	0.025898	30	1.48005	0.015735	9.2503	0.0983437
ArnB~P	116	133	ERAIEIAKKHDLPGYIIL	16	2078.19	9.14251	0.003343	100	1.96261	0.058447	12.2663	0.365294
ArnB~P	116	133	ERAIEIAKKHDLPGYIIL	16	2078.19	9.12302	0.050087	1000	2.3229	0.040205	14.5181	0.251281
ArnB~P	116	133	ERAIEIAKKHDLPGYIIL	16	2078.19	9.14518	0.013168	10000	2.52559	0.051984	15.785	0.3249
ArnA/ArnB~P	116	133	ERAIEIAKKHDLPGYIIL	16	2078.19	9.0963	0.010211	0	0	0	0	0
ArnA/ArnB~P	116	133	ERAIEIAKKHDLPGYIIL	16	2078.19	9.12037	0.005763	10	1.1035	0.011691	6.89689	0.0730688
ArnA/ArnB~P	116	133	ERAIEIAKKHDLPGYIIL	16	2078.19	9.14897	0.008843	30	1.44764	0.038016	9.04774	0.2376
ArnA/ArnB~P	116	133	ERAIEIAKKHDLPGYIIL	16	2078.19	9.1216	0.03383	100	1.92055	0.094287	12.0034	0.589294
ArnA/ArnB~P	116	133	ERAIEIAKKHDLPGYIIL	16	2078.19	9.14411	0.009255	1000	2.28577	0.012993	14.2861	0.0812062
ArnA/ArnB~P	116	133	ERAIEIAKKHDLPGYIIL	16	2078.19	9.13736	0.007719	10000	2.50681	0.017504	15.6676	0.1094
ArnB	119	130	IEIAKKHDLPGY	10	1382.76	7.6064	0.004932	0	0	0	0	0
ArnB	119	130	IEIAKKHDLPGY	10	1382.76	7.64414	0.030522	10	1.08372	0.021201	10.8372	0.21201
ArnB	119	130	IEIAKKHDLPGY	10	1382.76	7.69787	0.019826	30	1.49177	0.017075	14.9177	0.17075
ArnB	119	130	IEIAKKHDLPGY	10	1382.76	7.68309	0.009059	100	1.88273	0.00755	18.8273	0.0755
ArnB	119	130	IEIAKKHDLPGY	10	1382.76	7.69923	0.002942	1000	2.04532	0.112515	20.4532	1.12515
ArnB	119	130	IEIAKKHDLPGY	10	1382.76	7.67174	0.015979	10000	2.19518	0.009286	21.9518	0.09286
ArnB~P	119	130	IEIAKKHDLPGY	10	1382.76	7.52372	0.014824	0	0	0	0	0
ArnB~P	119	130	IEIAKKHDLPGY	10	1382.76	7.57351	0.023613	10	1.01643	0.017489	10.1643	0.17489
ArnB~P	119	130	IEIAKKHDLPGY	10	1382.76	7.58862	0.027787	30	1.38947	0.009863	13.8947	0.09863
ArnB~P	119	130	IEIAKKHDLPGY	10	1382.76	7.63891	0.024701	100	1.77771	0.028467	17.7771	0.28467
ArnB~P	119	130	IEIAKKHDLPGY	10	1382.76	7.59714	0.024527	1000	2.05731	0.013961	20.5731	0.13961
ArnB~P	119	130	IEIAKKHDLPGY	10	1382.76	7.61022	0.005999	10000	2.20104	0.02814	22.0104	0.2814
ArnA/ArnB~P	119	130	IEIAKKHDLPGY	10	1382.76	7.52084	0.01171	0	0	0	0	0
ArnA/ArnB~P	119	130	IEIAKKHDLPGY	10	1382.76	7.58411	0.021391	10	0.96392	0.028953	9.6392	0.28953
ArnA/ArnB~P	119	130	IEIAKKHDLPGY	10	1382.76	7.61966	0.004823	30	1.27007	0.012873	12.7007	0.12873
ArnA/ArnB~P	119	130	IEIAKKHDLPGY	10	1382.76	7.60656	0.030922	100	1.61591	0.026241	16.1591	0.26241
ArnA/ArnB~P	119	130	IEIAKKHDLPGY	10	1382.76	7.59141	0.009135	1000	2.00335	0.092386	20.0335	0.92386
ArnA/ArnB~P	119	130	IEIAKKHDLPGY	10	1382.76	7.61142	0.01619	10000	2.31083	0.012955	23.1083	0.12955
ArnB	119	133	IEIAKKHDLPGYIIL	13	1722.01	9.38648	0.012853	0	0	0	0	0
ArnB	119	133	IEIAKKHDLPGYIIL	13	1722.01	9.42312	0.018216	10	0.946734	0.012892	7.28257	0.0991692
ArnB	119	133	IEIAKKHDLPGYIIL	13	1722.01	9.47033	0.014973	30	1.35231	0.009321	10.4024	0.0717
ArnB	119	133	IEIAKKHDLPGYIIL	13	1722.01	9.45027	0.01283	100	1.78387	0.026349	13.7221	0.202685
ArnB	119	133	IEIAKKHDLPGYIIL	13	1722.01	9.45719	0.022716	1000	1.84173	0.019286	14.1672	0.148354
ArnB	119	133	IEIAKKHDLPGYIIL	13	1722.01	9.43529	0.006308	10000	1.90083	0.017538	14.6218	0.134908
ArnB~P	119	133	IEIAKKHDLPGYIIL	13	1722.01	9.37254	0.009222	0	0	0	0	0
ArnB~P	119	133	IEIAKKHDLPGYIIL	13	1722.01	9.36642	0.029608	10	0.902728	0.026933	6.94406	0.207177
ArnB~P	119	133	IEIAKKHDLPGYIIL	13	1722.01	9.39242	0.02027	30	1.25658	0.016588	9.66602	0.1276
ArnB~P	119	133	IEIAKKHDLPGYIIL	13	1722.01	9.39055	0.007081	100	1.63477	0.028576	12.5751	0.219815
ArnB~P	119	133	IEIAKKHDLPGYIIL	13	1722.01	9.37849	0.055519	1000	1.93379	0.011127	14.8753	0.0855923
ArnB~P	119	133	IEIAKKHDLPGYIIL	13	1722.01	9.40899	0.017485	10000	2.12828	0.02003	16.3714	0.154077
ArnA/ArnB~P	119	133	IEIAKKHDLPGYIIL	13	1722.01	9.35239	0.007712	0	0	0	0	0
ArnA/ArnB~P	119	133	IEIAKKHDLPGYIIL	13	1722.01	9.38078	0.005211	10	0.883291	0.019251	6.79455	0.148085
ArnA/ArnB~P	119	133	IEIAKKHDLPGYIIL	13	1722.01	9.40654	0.013157	30	1.19213	0.016266	9.17026	0.125123
ArnA/ArnB~P	119	133	IEIAKKHDLPGYIIL	13	1722.01	9.3945	0.019163	100	1.57875	0.025825	12.1442	0.198654
ArnA/ArnB~P	119	133	IEIAKKHDLPGYIIL	13	1722.01	9.4089	0.010394	1000	1.94678	0.017291	14.9752	0.133008
ArnA/ArnB~P	119	133	IEIAKKHDLPGYIIL	13	1722.01	9.39831	0.011727	10000	2.17881	0.022012	16.7601	0.169323
ArnB	121	130	IAKKHDLPGY	8	1140.63	7.06473	0.004482	0	0	0	0	0
ArnB	121	130	IAKKHDLPGY	8	1140.63	7.10373	0.035248	10	0.978365	0.017153	12.2296	0.214413
ArnB	121	130	IAKKHDLPGY	8	1140.63	7.17823	0.019418	30	1.43968	0.029323	17.996	0.366537
ArnB	121	130	IAKKHDLPGY	8	1140.63	7.16099	0.011051	100	1.87569	0.029826	23.4461	0.372825
ArnB	121	130	IAKKHDLPGY	8	1140.63	7.18158	0.002639	1000	1.9535	0.025566	24.4188	0.319575
ArnB	121	130	IAKKHDLPGY	8	1140.63	7.15778	0.017913	10000	1.97111	0.015568	24.6389	0.1946
ArnB~P	121	130	IAKKHDLPGY	8	1140.63	6.95252	0.017727	0	0	0	0	0
ArnB~P	121	130	IAKKHDLPGY	8	1140.63	7.01141	0.05496	10	0.954558	0.034137	11.932	0.426712
ArnB~P	121	130	IAKKHDLPGY	8	1140.63	7.00838	0.044069	30	1.29812	0.028515	16.2265	0.356437
ArnB~P	121	130	IAKKHDLPGY	8	1140.63	7.11226	0.023274	100	1.70436	0.037974	21.3044	0.474675
ArnB~P	121	130	IAKKHDLPGY	8	1140.63	7.0283	0.030996	1000	1.95062	0.012862	24.3827	0.160775
ArnB~P	121	130	IAKKHDLPGY	8	1140.63	7.05314	0.019406	10000	2.04465	0.018213	25.5581	0.227662
ArnA/ArnB~P	121	130	IAKKHDLPGY	8	1140.63	6.95627	0.010729	0	0	0	0	0
ArnA/ArnB~P	121	130	IAKKHDLPGY	8	1140.63	7.0167	0.026177	10	0.922046	0.019857	11.5256	0.248213
ArnA/ArnB~P	121	130	IAKKHDLPGY	8	1140.63	7.05846	0.011237	30	1.2408	0.020117	15.51	0.251462
ArnA/ArnB~P	121	130	IAKKHDLPGY	8	1140.63	7.04006	0.022905	100	1.64745	0.031581	20.5931	0.394762
ArnA/ArnB~P	121	130	IAKKHDLPGY	8	1140.63	7.0076	0.005407	1000	1.98205	0.017675	24.7756	0.220938
ArnA/ArnB~P	121	130	IAKKHDLPGY	8	1140.63	7.07402	0.015716	10000	2.09118	0.01745	26.1397	0.218125
ArnB	121	133	IAKKHDLPGYIIL	11	1479.88	9.24748	0.005812	0	0	0	0	0
ArnB	121	133	IAKKHDLPGYIIL	11	1479.88	9.28452	0.024187	10	0.803484	0.023078	7.3044	0.2098
ArnB	121	133	IAKKHDLPGYIIL	11	1479.88	9.35165	0.017034	30	1.23206	0.072476	11.2005	0.658873
ArnB	121	133	IAKKHDLPGYIIL	11	1479.88	9.33018	0.018544	100	1.68182	0.026531	15.2892	0.241191
ArnB	121	133	IAKKHDLPGYIIL	11	1479.88	9.34896	0.010138	1000	1.70973	0.010496	15.543	0.0954182
ArnB	121	133	IAKKHDLPGYIIL	11	1479.88	9.3087	0.007239	10000	1.76285	0.006547	16.0259	0.0595182
ArnB~P	121	133	IAKKHDLPGYIIL	11	1479.88	9.2314	0.01522	0	0	0	0	0
ArnB~P	121	133	IAKKHDLPGYIIL	11	1479.88	9.22482	0.024367	10	0.77778	0.009707	7.07073	0.0882455
ArnB~P	121	133	IAKKHDLPGYIIL	11	1479.88	9.24185	0.024212	30	1.12133	0.008881	10.1939	0.0807364
ArnB~P	121	133	IAKKHDLPGYIIL	11	1479.88	9.25498	0.004164	100	1.50276	0.079706	13.6615	0.7246
ArnB~P	121	133	IAKKHDLPGYIIL	11	1479.88	9.23131	0.050248	1000	1.69254	0.004299	15.3867	0.0390818
ArnB~P	121	133	IAKKHDLPGYIIL	11	1479.88	9.25907	0.012317	10000	1.86311	0.011467	16.9373	0.104245
ArnA/ArnB~P	121	133	IAKKHDLPGYIIL	11	1479.88	9.21045	0.010925	0	0	0	0	0
ArnA/ArnB~P	121	133	IAKKHDLPGYIIL	11	1479.88	9.22965	0.005837	10	0.762925	0.015413	6.93568	0.140118
ArnA/ArnB~P	121	133	IAKKHDLPGYIIL	11	1479.88	9.25455	0.010107	30	1.06196	0.003804	9.65421	0.0345818
ArnA/ArnB~P	121	133	IAKKHDLPGYIIL	11	1479.88	9.23424	0.029904	100	1.39957	0.017349	12.7233	0.157718
ArnA/ArnB~P	121	133	IAKKHDLPGYIIL	11	1479.88	9.25082	0.008318	1000	1.7236	0.004913	15.6691	0.0446636
ArnA/ArnB~P	121	133	IAKKHDLPGYIIL	11	1479.88	9.24928	0.007673	10000	1.92777	0.010942	17.5252	0.0994727
ArnB	126	133	DLPGYIIL	6	902.511	11.074	0.030589	0	0	0	0	0
ArnB	126	133	DLPGYIIL	6	902.511	11.0804	0.018736	10	0.100974	0.021549	1.6829	0.35915
ArnB	126	133	DLPGYIIL	6	902.511	11.1194	0.031245	30	0.101146	0.015201	1.68577	0.25335
ArnB	126	133	DLPGYIIL	6	902.511	11.1165	0.001925	100	0.111927	0.01556	1.86545	0.259333
ArnB	126	133	DLPGYIIL	6	902.511	11.1098	0.012238	1000	0.121699	0.017813	2.02832	0.296883
ArnB	126	133	DLPGYIIL	6	902.511	11.1177	0.015183	10000	0.174989	0.015265	2.91648	0.254417
ArnB~P	126	133	DLPGYIIL	6	902.511	11.0671	0.010597	0	0	0	0	0
ArnB~P	126	133	DLPGYIIL	6	902.511	11.018	0.021406	10	0.064412	0.019479	1.07353	0.32465
ArnB~P	126	133	DLPGYIIL	6	902.511	11.0583	0.04908	30	0.077344	0.020922	1.28907	0.3487
ArnB~P	126	133	DLPGYIIL	6	902.511	11.0087	0.00908	100	0.082698	0.020948	1.3783	0.349133
ArnB~P	126	133	DLPGYIIL	6	902.511	11.0822	0.009708	1000	0.139125	0.018792	2.31875	0.3132
ArnB~P	126	133	DLPGYIIL	6	902.511	11.1143	0.035458	10000	0.351297	0.020233	5.85495	0.337217
ArnA/ArnB~P	126	133	DLPGYIIL	6	902.511	11.0011	0.015132	0	0	0	0	0
ArnA/ArnB~P	126	133	DLPGYIIL	6	902.511	11.0481	0.018235	10	0.110004	0.006937	1.8334	0.115617
ArnA/ArnB~P	126	133	DLPGYIIL	6	902.511	11.0201	0.039566	30	0.118713	0.012747	1.97855	0.21245
ArnA/ArnB~P	126	133	DLPGYIIL	6	902.511	11.0219	0.045008	100	0.110088	0.004261	1.8348	0.0710167
ArnA/ArnB~P	126	133	DLPGYIIL	6	902.511	11.0523	0.016414	1000	0.207482	0.003133	3.45803	0.0522167
ArnA/ArnB~P	126	133	DLPGYIIL	6	902.511	11.0883	0.036222	10000	0.438875	0.00497	7.31458	0.0828333
ArnB	134	146	LTDGQPTDVPETD	10	1386.61	7.49124	0.002216	0	0	0	0	0
ArnB	134	146	LTDGQPTDVPETD	10	1386.61	7.49885	0.023114	10	4.38521	0.067352	43.8521	0.67352
ArnB	134	146	LTDGQPTDVPETD	10	1386.61	7.51589	0.021538	30	4.41944	0.049098	44.1944	0.49098
ArnB	134	146	LTDGQPTDVPETD	10	1386.61	7.49865	0.007422	100	4.38628	0.013011	43.8628	0.13011
ArnB	134	146	LTDGQPTDVPETD	10	1386.61	7.51844	0.003707	1000	4.72558	0.020015	47.2558	0.20015
ArnB	134	146	LTDGQPTDVPETD	10	1386.61	7.50645	0.01112	10000	4.87842	0.018363	48.7842	0.18363
ArnB~P	134	146	LTDGQPTDVPETD	10	1386.61	7.38237	0.015314	0	0	0	0	0
ArnB~P	134	146	LTDGQPTDVPETD	10	1386.61	7.44095	0.041615	10	4.16474	0.003083	41.6474	0.03083
ArnB~P	134	146	LTDGQPTDVPETD	10	1386.61	7.4694	0.036908	30	4.2121	0.031683	42.121	0.31683
ArnB~P	134	146	LTDGQPTDVPETD	10	1386.61	7.54157	0.025361	100	4.17515	0.010209	41.7515	0.10209
ArnB~P	134	146	LTDGQPTDVPETD	10	1386.61	7.49781	0.027603	1000	4.56868	0.013811	45.6868	0.13811
ArnB~P	134	146	LTDGQPTDVPETD	10	1386.61	7.51069	0.006465	10000	4.748	0.012267	47.48	0.12267
ArnA/ArnB~P	134	146	LTDGQPTDVPETD	10	1386.61	7.39196	0.010631	0	0	0	0	0
ArnA/ArnB~P	134	146	LTDGQPTDVPETD	10	1386.61	7.48323	0.019551	10	4.16689	0.02146	41.6689	0.2146
ArnA/ArnB~P	134	146	LTDGQPTDVPETD	10	1386.61	7.52119	0.008248	30	4.18245	0.007576	41.8245	0.07576
ArnA/ArnB~P	134	146	LTDGQPTDVPETD	10	1386.61	7.51622	0.027825	100	4.17923	0.016856	41.7923	0.16856
ArnA/ArnB~P	134	146	LTDGQPTDVPETD	10	1386.61	7.49781	0.009375	1000	4.52541	0.016092	45.2541	0.16092
ArnA/ArnB~P	134	146	LTDGQPTDVPETD	10	1386.61	7.52496	0.011388	10000	4.79196	0.013028	47.9196	0.13028
ArnB	134	147	LTDGQPTDVPETDA	11	1457.65	7.68888	0.001423	0	0	0	0	0
ArnB	134	147	LTDGQPTDVPETDA	11	1457.65	7.67165	0.018376	10	5.05705	0.073503	45.9732	0.668209
ArnB	134	147	LTDGQPTDVPETDA	11	1457.65	7.68286	0.020266	30	5.07409	0.065756	46.1281	0.597782
ArnB	134	147	LTDGQPTDVPETDA	11	1457.65	7.66932	0.008884	100	5.07512	0.061667	46.1375	0.560609
ArnB	134	147	LTDGQPTDVPETDA	11	1457.65	7.68701	0.003641	1000	5.30928	0.056432	48.2661	0.513018
ArnB	134	147	LTDGQPTDVPETDA	11	1457.65	7.66999	0.014416	10000	5.44888	0.073605	49.5353	0.669136
ArnB~P	134	147	LTDGQPTDVPETDA	11	1457.65	7.57508	0.020045	0	0	0	0	0
ArnB~P	134	147	LTDGQPTDVPETDA	11	1457.65	7.63131	0.03801	10	4.88586	0.032914	44.4169	0.299218
ArnB~P	134	147	LTDGQPTDVPETDA	11	1457.65	7.66246	0.035794	30	4.92335	0.0636	44.7577	0.578182
ArnB~P	134	147	LTDGQPTDVPETDA	11	1457.65	7.72139	0.020784	100	4.85667	0.017375	44.1515	0.157955
ArnB~P	134	147	LTDGQPTDVPETDA	11	1457.65	7.68299	0.02587	1000	5.23401	0.018063	47.5819	0.164209
ArnB~P	134	147	LTDGQPTDVPETDA	11	1457.65	7.70171	0.003208	10000	5.38413	0.012966	48.9466	0.117873
ArnA/ArnB~P	134	147	LTDGQPTDVPETDA	11	1457.65	7.58956	0.007708	0	0	0	0	0
ArnA/ArnB~P	134	147	LTDGQPTDVPETDA	11	1457.65	7.66284	0.017938	10	4.79242	0.036375	43.5674	0.330682
ArnA/ArnB~P	134	147	LTDGQPTDVPETDA	11	1457.65	7.70432	0.006474	30	4.79642	0.027007	43.6038	0.245518
ArnA/ArnB~P	134	147	LTDGQPTDVPETDA	11	1457.65	7.69555	0.029446	100	4.79786	0.027708	43.6169	0.251891
ArnA/ArnB~P	134	147	LTDGQPTDVPETDA	11	1457.65	7.68464	0.010929	1000	5.12544	0.025569	46.5949	0.232445
ArnA/ArnB~P	134	147	LTDGQPTDVPETDA	11	1457.65	7.70523	0.01611	10000	5.36688	0.038969	48.7898	0.354264
ArnB	134	150	LTDGQPTDVPETDAYEK	14	1877.85	7.74049	0.003553	0	0	0	0	0
ArnB	134	150	LTDGQPTDVPETDAYEK	14	1877.85	7.74552	0.021077	10	7.68387	0.111098	54.8848	0.793557
ArnB	134	150	LTDGQPTDVPETDAYEK	14	1877.85	7.77438	0.019125	30	7.70377	0.058059	55.0269	0.414707
ArnB	134	150	LTDGQPTDVPETDAYEK	14	1877.85	7.75923	0.011017	100	7.58486	0.019295	54.1776	0.137821
ArnB	134	150	LTDGQPTDVPETDAYEK	14	1877.85	7.77642	0.004481	1000	7.87963	0.019827	56.283	0.141621
ArnB	134	150	LTDGQPTDVPETDAYEK	14	1877.85	7.75899	0.011289	10000	7.99355	0.03529	57.0968	0.252071
ArnB~P	134	150	LTDGQPTDVPETDAYEK	14	1877.85	7.65487	0.011993	0	0	0	0	0
ArnB~P	134	150	LTDGQPTDVPETDAYEK	14	1877.85	7.69634	0.023755	10	7.29792	0.019897	52.128	0.142121
ArnB~P	134	150	LTDGQPTDVPETDAYEK	14	1877.85	7.721	0.031259	30	7.45017	0.085032	53.2155	0.607371
ArnB~P	134	150	LTDGQPTDVPETDAYEK	14	1877.85	7.77299	0.020819	100	7.34286	0.017705	52.449	0.126464
ArnB~P	134	150	LTDGQPTDVPETDAYEK	14	1877.85	7.73001	0.028808	1000	7.72997	0.017743	55.2141	0.126736
ArnB~P	134	150	LTDGQPTDVPETDAYEK	14	1877.85	7.75129	0.004112	10000	7.82314	0.017345	55.8796	0.123893
ArnA/ArnB~P	134	150	LTDGQPTDVPETDAYEK	14	1877.85	7.65869	0.009678	0	0	0	0	0
ArnA/ArnB~P	134	150	LTDGQPTDVPETDAYEK	14	1877.85	7.7165	0.019925	10	7.09815	0.015414	50.7011	0.1101
ArnA/ArnB~P	134	150	LTDGQPTDVPETDAYEK	14	1877.85	7.75318	0.004843	30	7.24841	0.015424	51.7743	0.110171
ArnA/ArnB~P	134	150	LTDGQPTDVPETDAYEK	14	1877.85	7.74373	0.029324	100	7.22081	0.013192	51.5772	0.0942286
ArnA/ArnB~P	134	150	LTDGQPTDVPETDAYEK	14	1877.85	7.73529	0.010542	1000	7.60388	0.015977	54.3134	0.114121
ArnA/ArnB~P	134	150	LTDGQPTDVPETDAYEK	14	1877.85	7.7532	0.018443	10000	7.8126	0.024579	55.8043	0.175564
ArnB	134	156	LTDGQPTDVPETDAYEKLNYPEA	19	2565.18	8.90096	0.010026	0	0	0	0	0
ArnB	134	156	LTDGQPTDVPETDAYEKLNYPEA	19	2565.18	8.90125	0.008005	10	11.0427	0.144257	58.1195	0.759247
ArnB	134	156	LTDGQPTDVPETDAYEKLNYPEA	19	2565.18	8.91995	0.015563	30	11.2328	0.099539	59.1201	0.523889
ArnB	134	156	LTDGQPTDVPETDAYEKLNYPEA	19	2565.18	8.91641	0.009511	100	11.3106	0.026693	59.5296	0.140489
ArnB	134	156	LTDGQPTDVPETDAYEKLNYPEA	19	2565.18	8.9353	0.00529	1000	11.5384	0.05793	60.7284	0.304895
ArnB	134	156	LTDGQPTDVPETDAYEKLNYPEA	19	2565.18	8.9088	0.009388	10000	11.6093	0.03342	61.1015	0.175895
ArnB~P	134	156	LTDGQPTDVPETDAYEKLNYPEA	19	2565.18	8.87299	0.016466	0	0	0	0	0
ArnB~P	134	156	LTDGQPTDVPETDAYEKLNYPEA	19	2565.18	8.88206	0.02279	10	10.6435	0.039603	56.0182	0.208437
ArnB~P	134	156	LTDGQPTDVPETDAYEKLNYPEA	19	2565.18	8.90156	0.025926	30	11.0214	0.094019	58.0074	0.494837
ArnB~P	134	156	LTDGQPTDVPETDAYEKLNYPEA	19	2565.18	8.92504	0.005538	100	11.0148	0.030068	57.9724	0.158253
ArnB~P	134	156	LTDGQPTDVPETDAYEKLNYPEA	19	2565.18	8.90495	0.047968	1000	11.3724	0.028264	59.8545	0.148758
ArnB~P	134	156	LTDGQPTDVPETDAYEKLNYPEA	19	2565.18	8.92731	0.011368	10000	11.3993	0.042594	59.9964	0.224179
ArnA/ArnB~P	134	156	LTDGQPTDVPETDAYEKLNYPEA	19	2565.18	8.86998	0.012013	0	0	0	0	0
ArnA/ArnB~P	134	156	LTDGQPTDVPETDAYEKLNYPEA	19	2565.18	8.89901	0.006135	10	10.5425	0.220525	55.487	1.16066
ArnA/ArnB~P	134	156	LTDGQPTDVPETDAYEKLNYPEA	19	2565.18	8.92687	0.002587	30	10.835	0.039383	57.0261	0.207279
ArnA/ArnB~P	134	156	LTDGQPTDVPETDAYEKLNYPEA	19	2565.18	8.89869	0.038948	100	10.9333	0.035347	57.5435	0.186037
ArnA/ArnB~P	134	156	LTDGQPTDVPETDAYEKLNYPEA	19	2565.18	8.92633	0.007541	1000	11.2561	0.024287	59.2428	0.127826
ArnA/ArnB~P	134	156	LTDGQPTDVPETDAYEKLNYPEA	19	2565.18	8.91844	0.002236	10000	11.475	0.039389	60.3947	0.207311
ArnB	137	150	GQPTDVPETDAYEK	11	1548.69	7.46534	0.003004	0	0	0	0	0
ArnB	137	150	GQPTDVPETDAYEK	11	1548.69	7.4741	0.024492	10	7.12087	0.110685	64.7352	1.00623
ArnB	137	150	GQPTDVPETDAYEK	11	1548.69	7.50795	0.022046	30	7.10414	0.054892	64.5831	0.499018
ArnB	137	150	GQPTDVPETDAYEK	11	1548.69	7.4887	0.008839	100	6.98041	0.019003	63.4583	0.172755
ArnB	137	150	GQPTDVPETDAYEK	11	1548.69	7.51007	0.003489	1000	6.9141	0.010631	62.8555	0.0966455
ArnB	137	150	GQPTDVPETDAYEK	11	1548.69	7.4965	0.012907	10000	6.83437	0.016558	62.1307	0.150527
ArnB~P	137	150	GQPTDVPETDAYEK	11	1548.69	7.36203	0.01516	0	0	0	0	0
ArnB~P	137	150	GQPTDVPETDAYEK	11	1548.69	7.4174	0.037096	10	6.9359	0.016441	63.0537	0.149464
ArnB~P	137	150	GQPTDVPETDAYEK	11	1548.69	7.44046	0.03391	30	7.01145	0.082839	63.7405	0.753082
ArnB~P	137	150	GQPTDVPETDAYEK	11	1548.69	7.5032	0.025668	100	6.88577	0.025931	62.5979	0.235736
ArnB~P	137	150	GQPTDVPETDAYEK	11	1548.69	7.46094	0.027181	1000	6.92854	0.014223	62.9867	0.1293
ArnB~P	137	150	GQPTDVPETDAYEK	11	1548.69	7.4753	0.007613	10000	6.7897	0.017935	61.7246	0.163045
ArnA/ArnB~P	137	150	GQPTDVPETDAYEK	11	1548.69	7.3625	0.00987	0	0	0	0	0
ArnA/ArnB~P	137	150	GQPTDVPETDAYEK	11	1548.69	7.44718	0.021564	10	6.90174	0.024444	62.7431	0.222218
ArnA/ArnB~P	137	150	GQPTDVPETDAYEK	11	1548.69	7.48328	0.00584	30	7.00422	0.02347	63.6748	0.213364
ArnA/ArnB~P	137	150	GQPTDVPETDAYEK	11	1548.69	7.47693	0.027735	100	6.93168	0.040957	63.0153	0.372336
ArnA/ArnB~P	137	150	GQPTDVPETDAYEK	11	1548.69	7.46015	0.009226	1000	7.05579	0.055058	64.1436	0.500527
ArnA/ArnB~P	137	150	GQPTDVPETDAYEK	11	1548.69	7.48843	0.012123	10000	6.96821	0.052504	63.3474	0.477309
ArnB	151	154	LNYP	2	505.253	8.45628	0.007323	0	0	0	0	0
ArnB	151	154	LNYP	2	505.253	8.46668	0.015719	10	0.811007	0.011169	40.5504	0.55845
ArnB	151	154	LNYP	2	505.253	8.49451	0.01753	30	0.767535	0.009004	38.3768	0.4502
ArnB	151	154	LNYP	2	505.253	8.4802	0.009308	100	0.761296	0.009331	38.0648	0.46655
ArnB	151	154	LNYP	2	505.253	8.49486	0.004322	1000	0.762511	0.008714	38.1256	0.4357
ArnB	151	154	LNYP	2	505.253	8.47878	0.013315	10000	0.776456	0.013834	38.8228	0.6917
ArnB~P	151	154	LNYP	2	505.253	8.40085	0.014089	0	0	0	0	0
ArnB~P	151	154	LNYP	2	505.253	8.43285	0.021321	10	0.799047	0.032228	39.9523	1.6114
ArnB~P	151	154	LNYP	2	505.253	8.45726	0.030749	30	0.801512	0.032652	40.0756	1.6326
ArnB~P	151	154	LNYP	2	505.253	8.51409	0.016272	100	0.781411	0.032449	39.0705	1.62245
ArnB~P	151	154	LNYP	2	505.253	8.46888	0.036702	1000	0.777268	0.032301	38.8634	1.61505
ArnB~P	151	154	LNYP	2	505.253	8.48685	0.004697	10000	0.771403	0.032357	38.5701	1.61785
ArnA/ArnB~P	151	154	LNYP	2	505.253	8.40012	0.008851	0	0	0	0	0
ArnA/ArnB~P	151	154	LNYP	2	505.253	8.44709	0.011955	10	0.811796	0.006146	40.5898	0.3073
ArnA/ArnB~P	151	154	LNYP	2	505.253	8.48819	0.001937	30	0.814464	0.003877	40.7232	0.19385
ArnA/ArnB~P	151	154	LNYP	2	505.253	8.47031	0.032647	100	0.80074	0.004948	40.037	0.2474
ArnA/ArnB~P	151	154	LNYP	2	505.253	8.47592	0.00834	1000	0.805954	0.007846	40.2977	0.3923
ArnA/ArnB~P	151	154	LNYP	2	505.253	8.47554	0.016707	10000	0.795515	0.002512	39.7758	0.1256
ArnB	151	156	LNYPEA	4	705.333	8.3022	0.005524	0	0	0	0	0
ArnB	151	156	LNYPEA	4	705.333	8.3106	0.013799	10	2.12076	0.027493	53.019	0.687325
ArnB	151	156	LNYPEA	4	705.333	8.3331	0.017714	30	2.12332	0.018945	53.0829	0.473625
ArnB	151	156	LNYPEA	4	705.333	8.32072	0.007551	100	2.08886	0.006189	52.2215	0.154725
ArnB	151	156	LNYPEA	4	705.333	8.33538	0.003308	1000	2.06714	0.008709	51.6785	0.217725
ArnB	151	156	LNYPEA	4	705.333	8.321	0.013399	10000	2.04749	0.004923	51.1872	0.123075
ArnB~P	151	156	LNYPEA	4	705.333	8.24503	0.015184	0	0	0	0	0
ArnB~P	151	156	LNYPEA	4	705.333	8.27721	0.01865	10	2.07676	0.022841	51.919	0.571025
ArnB~P	151	156	LNYPEA	4	705.333	8.28177	0.03695	30	2.0961	0.029358	52.4026	0.73395
ArnB~P	151	156	LNYPEA	4	705.333	8.16462	0.01637	100	2.01158	0.024562	50.2894	0.61405
ArnB~P	151	156	LNYPEA	4	705.333	8.24799	0.038404	1000	2.03231	0.029715	50.8077	0.742875
ArnB~P	151	156	LNYPEA	4	705.333	8.30922	0.059002	10000	1.99307	0.027098	49.8268	0.67745
ArnA/ArnB~P	151	156	LNYPEA	4	705.333	8.24431	0.008859	0	0	0	0	0
ArnA/ArnB~P	151	156	LNYPEA	4	705.333	8.29751	0.013814	10	2.10641	0.00989	52.6603	0.24725
ArnA/ArnB~P	151	156	LNYPEA	4	705.333	8.31367	0.055014	30	2.10951	0.00931	52.7377	0.23275
ArnA/ArnB~P	151	156	LNYPEA	4	705.333	8.29654	0.022652	100	2.06561	0.007156	51.6403	0.1789
ArnA/ArnB~P	151	156	LNYPEA	4	705.333	8.32628	0.009635	1000	2.06738	0.010371	51.6844	0.259275
ArnA/ArnB~P	151	156	LNYPEA	4	705.333	8.31535	0.02898	10000	2.05302	0.008677	51.3255	0.216925
ArnB	157	161	YKVIA	4	592.358	7.61247	0.005739	0	0	0	0	0
ArnB	157	161	YKVIA	4	592.358	7.6459	0.029353	10	-0.001737	0.021804	-0.043425	0.5451
ArnB	157	161	YKVIA	4	592.358	7.69749	0.019654	30	-0.013271	0.006552	-0.331775	0.1638
ArnB	157	161	YKVIA	4	592.358	7.67873	0.009015	100	0.005995	0.007234	0.149875	0.18085
ArnB	157	161	YKVIA	4	592.358	7.69916	0.000591	1000	0.002816	0.006037	0.0704	0.150925
ArnB	157	161	YKVIA	4	592.358	7.67595	0.016405	10000	0.028725	0.007425	0.718125	0.185625
ArnB~P	157	161	YKVIA	4	592.358	7.51508	0.01646	0	0	0	0	0
ArnB~P	157	161	YKVIA	4	592.358	7.56994	0.035826	10	0.053267	0.015474	1.33167	0.38685
ArnB~P	157	161	YKVIA	4	592.358	7.58241	0.034253	30	0.061913	0.01255	1.54783	0.31375
ArnB~P	157	161	YKVIA	4	592.358	7.65521	0.026888	100	0.051573	0.020942	1.28933	0.52355
ArnB~P	157	161	YKVIA	4	592.358	7.60121	0.026852	1000	0.095194	0.008227	2.37985	0.205675
ArnB~P	157	161	YKVIA	4	592.358	7.61335	0.006152	10000	0.310013	0.011071	7.75032	0.276775
ArnA/ArnB~P	157	161	YKVIA	4	592.358	7.51842	0.013598	0	0	0	0	0
ArnA/ArnB~P	157	161	YKVIA	4	592.358	7.58322	0.021797	10	0.088553	0.001959	2.21383	0.048975
ArnA/ArnB~P	157	161	YKVIA	4	592.358	7.62049	0.007095	30	0.098132	0.012003	2.4533	0.300075
ArnA/ArnB~P	157	161	YKVIA	4	592.358	7.61436	0.028654	100	0.089792	0.029221	2.2448	0.730525
ArnA/ArnB~P	157	161	YKVIA	4	592.358	7.58937	0.00795	1000	0.103626	0.004862	2.59065	0.12155
ArnA/ArnB~P	157	161	YKVIA	4	592.358	7.62315	0.014229	10000	0.364774	0.006356	9.11935	0.1589
ArnB	157	162	YKVIAF	5	739.426	9.53721	0.005543	0	0	0	0	0
ArnB	157	162	YKVIAF	5	739.426	9.54726	0.008884	10	0.048001	0.049395	0.96002	0.9879
ArnB	157	162	YKVIAF	5	739.426	9.53648	0.006803	30	0.101672	0.007388	2.03344	0.14776
ArnB	157	162	YKVIAF	5	739.426	9.52304	0.013511	100	0.088487	0.009131	1.76974	0.18262
ArnB	157	162	YKVIAF	5	739.426	9.53137	0.005748	1000	0.098831	0.008756	1.97662	0.17512
ArnB	157	162	YKVIAF	5	739.426	9.52816	0.012151	10000	0.103544	0.034208	2.07088	0.68416
ArnB~P	157	162	YKVIAF	5	739.426	9.60185	0.003396	0	0	0	0	0
ArnB~P	157	162	YKVIAF	5	739.426	9.59346	0.002657	10	0.107684	0.015066	2.15368	0.30132
ArnB~P	157	162	YKVIAF	5	739.426	9.59502	0.004	30	-0.018535	0.010986	-0.3707	0.21972
ArnB~P	157	162	YKVIAF	5	739.426	9.57253	0.008435	100	0.141147	0.007308	2.82294	0.14616
ArnB~P	157	162	YKVIAF	5	739.426	9.56535	0.006902	1000	0.068787	0.042161	1.37574	0.84322
ArnB~P	157	162	YKVIAF	5	739.426	9.54701	0.00513	10000	0.382995	0.008153	7.6599	0.16306
ArnA/ArnB~P	157	162	YKVIAF	5	739.426	9.57056	0.00798	0	0	0	0	0
ArnA/ArnB~P	157	162	YKVIAF	5	739.426	9.56103	0.004747	10	0.092542	0.008709	1.85084	0.17418
ArnA/ArnB~P	157	162	YKVIAF	5	739.426	9.57455	0.004784	30	0.111884	0.007168	2.23768	0.14336
ArnA/ArnB~P	157	162	YKVIAF	5	739.426	9.53483	0.00399	100	0.124011	0.01817	2.48022	0.3634
ArnA/ArnB~P	157	162	YKVIAF	5	739.426	9.53666	0.021703	1000	0.163947	0.011649	3.27894	0.23298
ArnA/ArnB~P	157	162	YKVIAF	5	739.426	9.53998	0.012408	10000	0.464184	0.018918	9.28368	0.37836
ArnB	157	167	YKVIAFGIGDD	10	1196.61	9.69062	0.008593	0	0	0	0	0
ArnB	157	167	YKVIAFGIGDD	10	1196.61	9.71358	0.010374	10	1.51016	0.041482	15.1016	0.41482
ArnB	157	167	YKVIAFGIGDD	10	1196.61	9.74575	0.013637	30	1.56834	0.031337	15.6834	0.31337
ArnB	157	167	YKVIAFGIGDD	10	1196.61	9.73234	0.006493	100	1.58472	0.035064	15.8472	0.35064
ArnB	157	167	YKVIAFGIGDD	10	1196.61	9.72508	0.0286	1000	1.94149	0.029409	19.4149	0.29409
ArnB	157	167	YKVIAFGIGDD	10	1196.61	9.71819	0.003241	10000	2.12207	0.04263	21.2207	0.4263
ArnB~P	157	167	YKVIAFGIGDD	10	1196.61	9.68882	0.006039	0	0	0	0	0
ArnB~P	157	167	YKVIAFGIGDD	10	1196.61	9.66565	0.020642	10	1.76695	0.024264	17.6695	0.24264
ArnB~P	157	167	YKVIAFGIGDD	10	1196.61	9.68779	0.01652	30	1.885	0.030073	18.85	0.30073
ArnB~P	157	167	YKVIAFGIGDD	10	1196.61	9.67352	0.022457	100	1.90856	0.022903	19.0856	0.22903
ArnB~P	157	167	YKVIAFGIGDD	10	1196.61	9.68829	0.059743	1000	2.07657	0.023283	20.7657	0.23283
ArnB~P	157	167	YKVIAFGIGDD	10	1196.61	9.72501	0.023426	10000	2.22078	0.018126	22.2078	0.18126
ArnA/ArnB~P	157	167	YKVIAFGIGDD	10	1196.61	9.66159	0.00913	0	0	0	0	0
ArnA/ArnB~P	157	167	YKVIAFGIGDD	10	1196.61	9.68498	0.00867	10	1.74348	0.008054	17.4348	0.08054
ArnA/ArnB~P	157	167	YKVIAFGIGDD	10	1196.61	9.7116	0.01534	30	1.81544	0.019156	18.1544	0.19156
ArnA/ArnB~P	157	167	YKVIAFGIGDD	10	1196.61	9.69774	0.014261	100	1.8771	0.014382	18.771	0.14382
ArnA/ArnB~P	157	167	YKVIAFGIGDD	10	1196.61	9.72211	0.014216	1000	2.0505	0.028781	20.505	0.28781
ArnA/ArnB~P	157	167	YKVIAFGIGDD	10	1196.61	9.70838	0.016301	10000	2.25887	0.011154	22.5887	0.11154
ArnB	157	168	YKVIAFGIGDDY	11	1359.67	10.0598	0.015432	0	0	0	0	0
ArnB	157	168	YKVIAFGIGDDY	11	1359.67	10.0635	0.002483	10	1.42678	0.020351	12.9707	0.185009
ArnB	157	168	YKVIAFGIGDDY	11	1359.67	10.1011	0.016215	30	1.4395	0.016923	13.0863	0.153845
ArnB	157	168	YKVIAFGIGDDY	11	1359.67	10.0885	0.008548	100	1.46065	0.009506	13.2786	0.0864182
ArnB	157	168	YKVIAFGIGDDY	11	1359.67	10.0734	0.040191	1000	1.71583	0.093958	15.5984	0.854164
ArnB	157	168	YKVIAFGIGDDY	11	1359.67	10.0782	0.004976	10000	2.02689	0.026184	18.4263	0.238036
ArnB~P	157	168	YKVIAFGIGDDY	11	1359.67	10.0677	0.010946	0	0	0	0	0
ArnB~P	157	168	YKVIAFGIGDDY	11	1359.67	10.0351	0.005776	10	1.63379	0.020554	14.8526	0.186855
ArnB~P	157	168	YKVIAFGIGDDY	11	1359.67	10.0425	0.00805	30	1.76606	0.016849	16.0551	0.153173
ArnB~P	157	168	YKVIAFGIGDDY	11	1359.67	10.027	0.01387	100	1.79229	0.018481	16.2935	0.168009
ArnB~P	157	168	YKVIAFGIGDDY	11	1359.67	10.0701	0.041622	1000	1.97506	0.011849	17.9551	0.107718
ArnB~P	157	168	YKVIAFGIGDDY	11	1359.67	10.1007	0.025961	10000	2.31989	0.017661	21.0899	0.160555
ArnA/ArnB~P	157	168	YKVIAFGIGDDY	11	1359.67	10.014	0.017076	0	0	0	0	0
ArnA/ArnB~P	157	168	YKVIAFGIGDDY	11	1359.67	10.0461	0.012223	10	1.6939	0.017696	15.3991	0.160873
ArnA/ArnB~P	157	168	YKVIAFGIGDDY	11	1359.67	10.055	0.023612	30	1.81193	0.020345	16.4721	0.184955
ArnA/ArnB~P	157	168	YKVIAFGIGDDY	11	1359.67	10.0461	0.007185	100	1.85673	0.01835	16.8794	0.166818
ArnA/ArnB~P	157	168	YKVIAFGIGDDY	11	1359.67	10.0724	0.008494	1000	2.04857	0.022728	18.6233	0.206618
ArnA/ArnB~P	157	168	YKVIAFGIGDDY	11	1359.67	10.0693	0.01838	10000	2.51887	0.024701	22.8988	0.224555
ArnB	157	171	YKVIAFGIGDDYNER	14	1758.86	9.28507	0.007495	0	0	0	0	0
ArnB	157	171	YKVIAFGIGDDYNER	14	1758.86	9.30533	0.016125	10	2.43833	0.035228	17.4166	0.251629
ArnB	157	171	YKVIAFGIGDDYNER	14	1758.86	9.34634	0.017558	30	2.66529	0.009097	19.0378	0.0649786
ArnB	157	171	YKVIAFGIGDDYNER	14	1758.86	9.33022	0.01478	100	2.91692	0.0205	20.8351	0.146429
ArnB	157	171	YKVIAFGIGDDYNER	14	1758.86	9.33769	0.010635	1000	3.66608	0.015692	26.1863	0.112086
ArnB	157	171	YKVIAFGIGDDYNER	14	1758.86	9.31068	0.007061	10000	3.89123	0.012287	27.7945	0.0877643
ArnB~P	157	171	YKVIAFGIGDDYNER	14	1758.86	9.27168	0.013991	0	0	0	0	0
ArnB~P	157	171	YKVIAFGIGDDYNER	14	1758.86	9.26216	0.026865	10	2.95792	0.024395	21.128	0.17425
ArnB~P	157	171	YKVIAFGIGDDYNER	14	1758.86	9.29353	0.02429	30	3.27599	0.039052	23.3999	0.278943
ArnB~P	157	171	YKVIAFGIGDDYNER	14	1758.86	9.29424	0.012798	100	3.44888	0.027326	24.6349	0.195186
ArnB~P	157	171	YKVIAFGIGDDYNER	14	1758.86	9.29139	0.060021	1000	3.83344	0.021443	27.3817	0.153164
ArnB~P	157	171	YKVIAFGIGDDYNER	14	1758.86	9.32137	0.022673	10000	4.14887	0.012508	29.6348	0.0893429
ArnA/ArnB~P	157	171	YKVIAFGIGDDYNER	14	1758.86	9.25058	0.00816	0	0	0	0	0
ArnA/ArnB~P	157	171	YKVIAFGIGDDYNER	14	1758.86	9.2736	0.003623	10	2.92546	0.017317	20.8962	0.123693
ArnA/ArnB~P	157	171	YKVIAFGIGDDYNER	14	1758.86	9.30592	0.019269	30	3.18276	0.015995	22.734	0.11425
ArnA/ArnB~P	157	171	YKVIAFGIGDDYNER	14	1758.86	9.28467	0.030352	100	3.41789	0.018156	24.4135	0.129686
ArnA/ArnB~P	157	171	YKVIAFGIGDDYNER	14	1758.86	9.3129	0.014033	1000	3.82133	0.011617	27.2952	0.0829786
ArnA/ArnB~P	157	171	YKVIAFGIGDDYNER	14	1758.86	9.29896	0.014075	10000	4.2866	0.030071	30.6186	0.214793
ArnB	157	172	YKVIAFGIGDDYNERL	15	1871.94	9.67252	0.011254	0	0	0	0	0
ArnB	157	172	YKVIAFGIGDDYNERL	15	1871.94	9.69749	0.012055	10	2.51957	0.070203	16.7971	0.46802
ArnB	157	172	YKVIAFGIGDDYNERL	15	1871.94	9.73487	0.013512	30	2.78687	0.01944	18.5791	0.1296
ArnB	157	172	YKVIAFGIGDDYNERL	15	1871.94	9.72194	0.004924	100	3.19416	0.026013	21.2944	0.17342
ArnB	157	172	YKVIAFGIGDDYNERL	15	1871.94	9.7078	0.03035	1000	4.54887	0.024666	30.3258	0.16444
ArnB	157	172	YKVIAFGIGDDYNERL	15	1871.94	9.70666	0.002308	10000	4.77196	0.012515	31.8131	0.0834333
ArnB~P	157	172	YKVIAFGIGDDYNERL	15	1871.94	9.67657	0.007489	0	0	0	0	0
ArnB~P	157	172	YKVIAFGIGDDYNERL	15	1871.94	9.65029	0.020682	10	3.06656	0.06062	20.4437	0.404133
ArnB~P	157	172	YKVIAFGIGDDYNERL	15	1871.94	9.67083	0.017389	30	3.47103	0.088232	23.1402	0.588213
ArnB~P	157	172	YKVIAFGIGDDYNERL	15	1871.94	9.65185	0.023077	100	3.90345	0.065471	26.023	0.436473
ArnB~P	157	172	YKVIAFGIGDDYNERL	15	1871.94	9.67044	0.059573	1000	4.66527	0.058449	31.1018	0.38966
ArnB~P	157	172	YKVIAFGIGDDYNERL	15	1871.94	9.70705	0.026324	10000	4.98385	0.060799	33.2257	0.405327
ArnA/ArnB~P	157	172	YKVIAFGIGDDYNERL	15	1871.94	9.64542	0.009941	0	0	0	0	0
ArnA/ArnB~P	157	172	YKVIAFGIGDDYNERL	15	1871.94	9.67014	0.008634	10	3.11674	0.01772	20.7782	0.118133
ArnA/ArnB~P	157	172	YKVIAFGIGDDYNERL	15	1871.94	9.69455	0.015146	30	3.49703	0.021771	23.3136	0.14514
ArnA/ArnB~P	157	172	YKVIAFGIGDDYNERL	15	1871.94	9.68239	0.010638	100	3.94224	0.017664	26.2816	0.11776
ArnA/ArnB~P	157	172	YKVIAFGIGDDYNERL	15	1871.94	9.70483	0.014577	1000	4.7196	0.018611	31.464	0.124073
ArnA/ArnB~P	157	172	YKVIAFGIGDDYNERL	15	1871.94	9.69355	0.01693	10000	5.17433	0.03269	34.4955	0.217933
ArnB	157	173	YKVIAFGIGDDYNERLL	16	1985.03	10.0013	0.014936	0	0	0	0	0
ArnB	157	173	YKVIAFGIGDDYNERLL	16	1985.03	10.023	0.005844	10	2.47767	0.051474	15.4854	0.321713
ArnB	157	173	YKVIAFGIGDDYNERLL	16	1985.03	10.0568	0.016065	30	2.79828	0.027335	17.4892	0.170844
ArnB	157	173	YKVIAFGIGDDYNERLL	16	1985.03	10.0404	0.00614	100	3.16581	0.03167	19.7863	0.197937
ArnB	157	173	YKVIAFGIGDDYNERLL	16	1985.03	10.0367	0.024746	1000	4.45961	0.050798	27.8726	0.317488
ArnB	157	173	YKVIAFGIGDDYNERLL	16	1985.03	10.0342	0.005408	10000	4.78674	0.043871	29.9171	0.274194
ArnB~P	157	173	YKVIAFGIGDDYNERLL	16	1985.03	10.0154	0.016965	0	0	0	0	0
ArnB~P	157	173	YKVIAFGIGDDYNERLL	16	1985.03	9.97587	0.006897	10	3.08627	0.020627	19.2892	0.128919
ArnB~P	157	173	YKVIAFGIGDDYNERLL	16	1985.03	9.98626	0.015101	30	3.49458	0.040292	21.8411	0.251825
ArnB~P	157	173	YKVIAFGIGDDYNERLL	16	1985.03	9.9591	0.024818	100	3.87787	0.024375	24.2367	0.152344
ArnB~P	157	173	YKVIAFGIGDDYNERLL	16	1985.03	10.0083	0.051156	1000	4.69968	0.013976	29.373	0.08735
ArnB~P	157	173	YKVIAFGIGDDYNERLL	16	1985.03	10.0445	0.023231	10000	5.26675	0.011326	32.9172	0.0707875
ArnA/ArnB~P	157	173	YKVIAFGIGDDYNERLL	16	1985.03	9.95585	0.014158	0	0	0	0	0
ArnA/ArnB~P	157	173	YKVIAFGIGDDYNERLL	16	1985.03	9.9884	0.02051	10	3.05016	0.024649	19.0635	0.154056
ArnA/ArnB~P	157	173	YKVIAFGIGDDYNERLL	16	1985.03	10.003	0.026052	30	3.41457	0.020805	21.3411	0.130031
ArnA/ArnB~P	157	173	YKVIAFGIGDDYNERLL	16	1985.03	9.99162	0.014429	100	3.91887	0.03511	24.493	0.219438
ArnA/ArnB~P	157	173	YKVIAFGIGDDYNERLL	16	1985.03	10.0193	0.008073	1000	4.74916	0.02671	29.6823	0.166938
ArnA/ArnB~P	157	173	YKVIAFGIGDDYNERLL	16	1985.03	10.0161	0.021616	10000	5.47568	0.028406	34.223	0.177538
ArnB	160	166	IAFGIGD	6	691.354	9.64178	0.012473	0	0	0	0	0
ArnB	160	166	IAFGIGD	6	691.354	9.65175	0.006751	10	0.447178	0.00954	7.45297	0.159
ArnB	160	166	IAFGIGD	6	691.354	9.66975	0.010893	30	0.452058	0.007028	7.5343	0.117133
ArnB	160	166	IAFGIGD	6	691.354	9.65805	0.006254	100	0.506128	0.009248	8.43547	0.154133
ArnB	160	166	IAFGIGD	6	691.354	9.65585	0.017213	1000	0.836084	0.007402	13.9347	0.123367
ArnB	160	166	IAFGIGD	6	691.354	9.64565	0.004397	10000	1.08689	0.004805	18.1148	0.0800833
ArnB~P	160	166	IAFGIGD	6	691.354	9.62434	0.00794	0	0	0	0	0
ArnB~P	160	166	IAFGIGD	6	691.354	9.61181	0.026031	10	0.773857	0.006231	12.8976	0.10385
ArnB~P	160	166	IAFGIGD	6	691.354	9.63989	0.021542	30	0.82408	0.01139	13.7347	0.189833
ArnB~P	160	166	IAFGIGD	6	691.354	9.63776	0.015337	100	0.841258	0.007623	14.021	0.12705
ArnB~P	160	166	IAFGIGD	6	691.354	9.64711	0.057888	1000	1.00793	0.008685	16.7988	0.14475
ArnB~P	160	166	IAFGIGD	6	691.354	9.67633	0.018265	10000	1.16459	0.011141	19.4098	0.185683
ArnA/ArnB~P	160	166	IAFGIGD	6	691.354	9.60775	0.008508	0	0	0	0	0
ArnA/ArnB~P	160	166	IAFGIGD	6	691.354	9.63702	0.006503	10	0.824371	0.007147	13.7395	0.119117
ArnA/ArnB~P	160	166	IAFGIGD	6	691.354	9.66898	0.013705	30	0.838077	0.006225	13.9679	0.10375
ArnA/ArnB~P	160	166	IAFGIGD	6	691.354	9.65333	0.020247	100	0.84407	0.006813	14.0678	0.11355
ArnA/ArnB~P	160	166	IAFGIGD	6	691.354	9.67786	0.013197	1000	1.00845	0.006272	16.8075	0.104533
ArnA/ArnB~P	160	166	IAFGIGD	6	691.354	9.66014	0.013534	10000	1.22005	0.011375	20.3341	0.189583
ArnB	160	167	IAFGIGDD	7	806.38	9.61581	0.006976	0	0	0	0	0
ArnB	160	167	IAFGIGDD	7	806.38	9.62156	0.006875	10	0.803311	0.010443	11.4759	0.149186
ArnB	160	167	IAFGIGDD	7	806.38	9.61165	0.007905	30	0.769729	0.024307	10.9961	0.347243
ArnB	160	167	IAFGIGDD	7	806.38	9.59866	0.009389	100	0.79501	0.019289	11.3573	0.275557
ArnB	160	167	IAFGIGDD	7	806.38	9.60735	0.009372	1000	1.127	0.010537	16.1	0.150529
ArnB	160	167	IAFGIGDD	7	806.38	9.60404	0.01132	10000	1.3617	0.043059	19.4529	0.615129
ArnB~P	160	167	IAFGIGDD	7	806.38	9.64609	0.00285	0	0	0	0	0
ArnB~P	160	167	IAFGIGDD	7	806.38	9.64826	0.00304	10	1.16713	0.016016	16.6733	0.2288
ArnB~P	160	167	IAFGIGDD	7	806.38	9.64892	0.00299	30	1.28732	0.020495	18.3903	0.292786
ArnB~P	160	167	IAFGIGDD	7	806.38	9.64327	0.0061	100	1.23629	0.030048	17.6614	0.429257
ArnB~P	160	167	IAFGIGDD	7	806.38	9.63326	0.005292	1000	1.44885	0.02723	20.6978	0.389
ArnB~P	160	167	IAFGIGDD	7	806.38	9.62862	0.006536	10000	1.51451	0.017537	21.6358	0.250529
ArnA/ArnB~P	160	167	IAFGIGDD	7	806.38	9.63789	0.005853	0	0	0	0	0
ArnA/ArnB~P	160	167	IAFGIGDD	7	806.38	9.63245	0.004528	10	1.16325	0.032655	16.6179	0.4665
ArnA/ArnB~P	160	167	IAFGIGDD	7	806.38	9.63368	0.00407	30	1.29601	0.032197	18.5144	0.459957
ArnA/ArnB~P	160	167	IAFGIGDD	7	806.38	9.61615	0.003853	100	1.16909	0.032327	16.7013	0.461814
ArnA/ArnB~P	160	167	IAFGIGDD	7	806.38	9.6155	0.011792	1000	1.34715	0.051891	19.245	0.7413
ArnA/ArnB~P	160	167	IAFGIGDD	7	806.38	9.62058	0.008711	10000	1.58793	0.059538	22.6846	0.850543
ArnB	160	168	IAFGIGDDY	8	969.444	10.148	0.015596	0	0	0	0	0
ArnB	160	168	IAFGIGDDY	8	969.444	10.1542	0.003346	10	1.44673	0.027744	18.0841	0.3468
ArnB	160	168	IAFGIGDDY	8	969.444	10.183	0.01501	30	1.47824	0.012993	18.478	0.162412
ArnB	160	168	IAFGIGDDY	8	969.444	10.1693	0.005085	100	1.47948	0.008511	18.4935	0.106387
ArnB	160	168	IAFGIGDDY	8	969.444	10.1615	0.023212	1000	1.80526	0.021801	22.5657	0.272512
ArnB	160	168	IAFGIGDDY	8	969.444	10.164	0.005398	10000	1.99976	0.013479	24.997	0.168487
ArnB~P	160	168	IAFGIGDDY	8	969.444	10.1497	0.009325	0	0	0	0	0
ArnB~P	160	168	IAFGIGDDY	8	969.444	10.1234	0.01177	10	1.5651	0.007342	19.5638	0.091775
ArnB~P	160	168	IAFGIGDDY	8	969.444	10.1376	0.010781	30	1.70882	0.030483	21.3603	0.381037
ArnB~P	160	168	IAFGIGDDY	8	969.444	10.1224	0.014211	100	1.7647	0.013791	22.0587	0.172387
ArnB~P	160	168	IAFGIGDDY	8	969.444	10.1687	0.047188	1000	1.90636	0.010423	23.8295	0.130288
ArnB~P	160	168	IAFGIGDDY	8	969.444	10.1983	0.024009	10000	2.03007	0.007023	25.3758	0.0877875
ArnA/ArnB~P	160	168	IAFGIGDDY	8	969.444	10.1082	0.012553	0	0	0	0	0
ArnA/ArnB~P	160	168	IAFGIGDDY	8	969.444	10.1392	0.013551	10	1.63225	0.023713	20.4031	0.296413
ArnA/ArnB~P	160	168	IAFGIGDDY	8	969.444	10.1538	0.023516	30	1.75225	0.014655	21.9031	0.183188
ArnA/ArnB~P	160	168	IAFGIGDDY	8	969.444	10.1422	0.008552	100	1.81422	0.013258	22.6777	0.165725
ArnA/ArnB~P	160	168	IAFGIGDDY	8	969.444	10.1716	0.009402	1000	1.96957	0.013656	24.6197	0.1707
ArnA/ArnB~P	160	168	IAFGIGDDY	8	969.444	10.1625	0.018566	10000	2.1675	0.01387	27.0937	0.173375
ArnB	160	172	IAFGIGDDYNERL	12	1481.71	9.80832	0.009406	0	0	0	0	0
ArnB	160	172	IAFGIGDDYNERL	12	1481.71	9.80574	0.007053	10	2.56383	0.05457	21.3652	0.45475
ArnB	160	172	IAFGIGDDYNERL	12	1481.71	9.79935	0.006989	30	2.68097	0.03124	22.3414	0.260333
ArnB	160	172	IAFGIGDDYNERL	12	1481.71	9.78001	0.009957	100	3.05379	0.021251	25.4482	0.177092
ArnB	160	172	IAFGIGDDYNERL	12	1481.71	9.77838	0.012505	1000	4.33169	0.013656	36.0975	0.1138
ArnB	160	172	IAFGIGDDYNERL	12	1481.71	9.76712	0.010937	10000	4.61116	0.120479	38.4264	1.00399
ArnB~P	160	172	IAFGIGDDYNERL	12	1481.71	9.85629	0.002493	0	0	0	0	0
ArnB~P	160	172	IAFGIGDDYNERL	12	1481.71	9.84633	0.003659	10	3.23369	0.027396	26.9474	0.2283
ArnB~P	160	172	IAFGIGDDYNERL	12	1481.71	9.84728	0.001193	30	3.75056	0.015443	31.2547	0.128692
ArnB~P	160	172	IAFGIGDDYNERL	12	1481.71	9.83531	0.007172	100	3.92844	0.018653	32.737	0.155442
ArnB~P	160	172	IAFGIGDDYNERL	12	1481.71	9.82584	0.005093	1000	5.01742	0.06386	41.8119	0.532167
ArnB~P	160	172	IAFGIGDDYNERL	12	1481.71	9.81814	0.007485	10000	4.80552	0.018621	40.046	0.155175
ArnA/ArnB~P	160	172	IAFGIGDDYNERL	12	1481.71	9.84718	0.007912	0	0	0	0	0
ArnA/ArnB~P	160	172	IAFGIGDDYNERL	12	1481.71	9.83524	0.002823	10	3.08504	0.027835	25.7087	0.231958
ArnA/ArnB~P	160	172	IAFGIGDDYNERL	12	1481.71	9.82832	0.00341	30	3.69443	0.030434	30.787	0.253617
ArnA/ArnB~P	160	172	IAFGIGDDYNERL	12	1481.71	9.82074	0.002151	100	3.85616	0.021801	32.1347	0.181675
ArnA/ArnB~P	160	172	IAFGIGDDYNERL	12	1481.71	9.8214	0.008998	1000	4.6678	0.176029	38.8983	1.46691
ArnA/ArnB~P	160	172	IAFGIGDDYNERL	12	1481.71	9.81749	0.006183	10000	4.93833	0.181691	41.1528	1.51409
ArnB	161	168	AFGIGDDY	7	856.36	9.81345	0.008924	0	0	0	0	0
ArnB	161	168	AFGIGDDY	7	856.36	9.82549	0.004918	10	1.46637	0.025863	20.9481	0.369471
ArnB	161	168	AFGIGDDY	7	856.36	9.84722	0.009995	30	1.53465	0.026071	21.9235	0.372443
ArnB	161	168	AFGIGDDY	7	856.36	9.83593	0.004731	100	1.5164	0.044173	21.6629	0.631043
ArnB	161	168	AFGIGDDY	7	856.36	9.82918	0.021486	1000	1.86606	0.02764	26.658	0.394857
ArnB	161	168	AFGIGDDY	7	856.36	9.82568	0.001912	10000	2.08208	0.01526	29.744	0.218
ArnB~P	161	168	AFGIGDDY	7	856.36	9.81109	0.005479	0	0	0	0	0
ArnB~P	161	168	AFGIGDDY	7	856.36	9.79353	0.01947	10	1.61467	0.01239	23.0668	0.177
ArnB~P	161	168	AFGIGDDY	7	856.36	9.81848	0.017127	30	1.71018	0.01967	24.4311	0.281
ArnB~P	161	168	AFGIGDDY	7	856.36	9.80746	0.017452	100	1.73906	0.015525	24.8437	0.221786
ArnB~P	161	168	AFGIGDDY	7	856.36	9.83037	0.060258	1000	1.93954	0.007401	27.7077	0.105729
ArnB~P	161	168	AFGIGDDY	7	856.36	9.85922	0.020707	10000	2.18381	0.015142	31.1973	0.216314
ArnA/ArnB~P	161	168	AFGIGDDY	7	856.36	9.77609	0.010208	0	0	0	0	0
ArnA/ArnB~P	161	168	AFGIGDDY	7	856.36	9.80552	0.00929	10	1.5784	0.011048	22.5486	0.157829
ArnA/ArnB~P	161	168	AFGIGDDY	7	856.36	9.83233	0.016265	30	1.68121	0.009645	24.0173	0.137786
ArnA/ArnB~P	161	168	AFGIGDDY	7	856.36	9.81816	0.015987	100	1.70183	0.02326	24.3119	0.332286
ArnA/ArnB~P	161	168	AFGIGDDY	7	856.36	9.84392	0.014737	1000	1.90273	0.036504	27.1819	0.521486
ArnA/ArnB~P	161	168	AFGIGDDY	7	856.36	9.82913	0.015666	10000	2.19936	0.039471	31.4194	0.563871
ArnB	162	168	FGIGDDY	6	785.323	9.60258	0.008695	0	0	0	0	0
ArnB	162	168	FGIGDDY	6	785.323	9.61427	0.008999	10	1.36317	0.028584	22.7194	0.4764
ArnB	162	168	FGIGDDY	6	785.323	9.63564	0.008893	30	1.37152	0.016366	22.8587	0.272767
ArnB	162	168	FGIGDDY	6	785.323	9.6221	0.004987	100	1.38872	0.014877	23.1453	0.24795
ArnB	162	168	FGIGDDY	6	785.323	9.62402	0.01275	1000	1.71297	0.018349	28.5496	0.305817
ArnB	162	168	FGIGDDY	6	785.323	9.60981	0.004441	10000	1.89918	0.015077	31.6531	0.251283
ArnB~P	162	168	FGIGDDY	6	785.323	9.59458	0.007578	0	0	0	0	0
ArnB~P	162	168	FGIGDDY	6	785.323	9.58439	0.026516	10	1.53828	0.012081	25.638	0.20135
ArnB~P	162	168	FGIGDDY	6	785.323	9.61426	0.022368	30	1.65463	0.024261	27.5771	0.40435
ArnB~P	162	168	FGIGDDY	6	785.323	9.61282	0.01158	100	1.68167	0.008308	28.0278	0.138467
ArnB~P	162	168	FGIGDDY	6	785.323	9.61988	0.057978	1000	1.81817	0.007323	30.3027	0.12205
ArnB~P	162	168	FGIGDDY	6	785.323	9.64597	0.017258	10000	1.93932	0.00858	32.3219	0.143
ArnA/ArnB~P	162	168	FGIGDDY	6	785.323	9.57832	0.008537	0	0	0	0	0
ArnA/ArnB~P	162	168	FGIGDDY	6	785.323	9.60518	0.007499	10	1.54809	0.012647	25.8015	0.210783
ArnA/ArnB~P	162	168	FGIGDDY	6	785.323	9.6377	0.011956	30	1.64936	0.01269	27.4894	0.2115
ArnA/ArnB~P	162	168	FGIGDDY	6	785.323	9.62249	0.022687	100	1.69457	0.01066	28.2428	0.177667
ArnA/ArnB~P	162	168	FGIGDDY	6	785.323	9.64579	0.01264	1000	1.83406	0.009851	30.5676	0.164183
ArnA/ArnB~P	162	168	FGIGDDY	6	785.323	9.6283	0.011603	10000	1.98275	0.010081	33.0458	0.168017
ArnB	162	172	FGIGDDYNERL	10	1297.59	9.36487	0.009704	0	0	0	0	0
ArnB	162	172	FGIGDDYNERL	10	1297.59	9.39027	0.008341	10	2.247	0.053087	22.47	0.53087
ArnB	162	172	FGIGDDYNERL	10	1297.59	9.37487	0.005829	30	2.36789	0.026783	23.6789	0.26783
ArnB	162	172	FGIGDDYNERL	10	1297.59	9.36759	0.010319	100	2.716	0.020708	27.16	0.20708
ArnB	162	172	FGIGDDYNERL	10	1297.59	9.37554	0.003467	1000	3.93627	0.009113	39.3627	0.09113
ArnB	162	172	FGIGDDYNERL	10	1297.59	9.37495	0.010666	10000	4.24021	0.131551	42.4021	1.31551
ArnB~P	162	172	FGIGDDYNERL	10	1297.59	9.42484	0.002148	0	0	0	0	0
ArnB~P	162	172	FGIGDDYNERL	10	1297.59	9.42172	0.004288	10	2.78962	0.034294	27.8962	0.34294
ArnB~P	162	172	FGIGDDYNERL	10	1297.59	9.4278	0.004587	30	3.22546	0.029385	32.2546	0.29385
ArnB~P	162	172	FGIGDDYNERL	10	1297.59	9.40596	0.006127	100	3.44333	0.024463	34.4333	0.24463
ArnB~P	162	172	FGIGDDYNERL	10	1297.59	9.40357	0.0086	1000	4.47257	0.030302	44.7257	0.30302
ArnB~P	162	172	FGIGDDYNERL	10	1297.59	9.38744	0.003279	10000	4.30903	0.017723	43.0903	0.17723
ArnA/ArnB~P	162	172	FGIGDDYNERL	10	1297.59	9.40027	0.005826	0	0	0	0	0
ArnA/ArnB~P	162	172	FGIGDDYNERL	10	1297.59	9.38566	0.001919	10	2.73064	0.025034	27.3064	0.25034
ArnA/ArnB~P	162	172	FGIGDDYNERL	10	1297.59	9.39954	0.003681	30	3.28209	0.029665	32.8209	0.29665
ArnA/ArnB~P	162	172	FGIGDDYNERL	10	1297.59	9.36306	0.00482	100	3.4419	0.023852	34.419	0.23852
ArnA/ArnB~P	162	172	FGIGDDYNERL	10	1297.59	9.36575	0.021032	1000	4.27118	0.172589	42.7118	1.72589
ArnA/ArnB~P	162	172	FGIGDDYNERL	10	1297.59	9.36963	0.014852	10000	4.49762	0.156386	44.9762	1.56386
ArnB	163	168	GIGDDY	5	638.254	8.30411	0.007239	0	0	0	0	0
ArnB	163	168	GIGDDY	5	638.254	8.31324	0.016579	10	1.33312	0.023164	26.6624	0.46328
ArnB	163	168	GIGDDY	5	638.254	8.33985	0.016582	30	1.35172	0.020922	27.0344	0.41844
ArnB	163	168	GIGDDY	5	638.254	8.32532	0.008625	100	1.36727	0.01727	27.3454	0.3454
ArnB	163	168	GIGDDY	5	638.254	8.34335	0.002023	1000	1.58846	0.006845	31.7691	0.1369
ArnB	163	168	GIGDDY	5	638.254	8.32666	0.013968	10000	1.9601	0.014559	39.2019	0.29118
ArnB~P	163	168	GIGDDY	5	638.254	8.24069	0.017223	0	0	0	0	0
ArnB~P	163	168	GIGDDY	5	638.254	8.27323	0.023517	10	1.52386	0.057951	30.4772	1.15902
ArnB~P	163	168	GIGDDY	5	638.254	8.29561	0.033729	30	1.60667	0.058237	32.1334	1.16474
ArnB~P	163	168	GIGDDY	5	638.254	8.35895	0.019562	100	1.61651	0.055714	32.3301	1.11428
ArnB~P	163	168	GIGDDY	5	638.254	8.31099	0.036299	1000	1.70191	0.055998	34.0382	1.11996
ArnB~P	163	168	GIGDDY	5	638.254	8.33191	0.004301	10000	1.94645	0.059963	38.9291	1.19926
ArnA/ArnB~P	163	168	GIGDDY	5	638.254	8.24222	0.008362	0	0	0	0	0
ArnA/ArnB~P	163	168	GIGDDY	5	638.254	8.2972	0.018226	10	1.46955	0.007535	29.391	0.1507
ArnA/ArnB~P	163	168	GIGDDY	5	638.254	8.34296	0.004987	30	1.54593	0.010182	30.9186	0.20364
ArnA/ArnB~P	163	168	GIGDDY	5	638.254	8.33185	0.031381	100	1.5747	0.009424	31.494	0.18848
ArnA/ArnB~P	163	168	GIGDDY	5	638.254	8.32893	0.008742	1000	1.66931	0.007827	33.3862	0.15654
ArnA/ArnB~P	163	168	GIGDDY	5	638.254	8.33693	0.018022	10000	1.92027	0.01507	38.4054	0.3014
ArnB	168	172	YNERL	4	693.344	7.60065	0.007715	0	0	0	0	0
ArnB	168	172	YNERL	4	693.344	7.60616	0.006677	10	0.488624	0.032712	12.2156	0.8178
ArnB	168	172	YNERL	4	693.344	7.58746	0.011636	30	0.743178	0.017003	18.5795	0.425075
ArnB	168	172	YNERL	4	693.344	7.57426	0.014388	100	1.10173	0.015943	27.5433	0.398575
ArnB	168	172	YNERL	4	693.344	7.57788	0.011424	1000	1.93594	0.012741	48.3986	0.318525
ArnB	168	172	YNERL	4	693.344	7.60065	0.012231	10000	2.01368	0.035738	50.3421	0.89345
ArnB~P	168	172	YNERL	4	693.344	7.65374	0.005449	0	0	0	0	0
ArnB~P	168	172	YNERL	4	693.344	7.65494	0.002464	10	1.00208	0.016094	25.052	0.40235
ArnB~P	168	172	YNERL	4	693.344	7.65942	0.002915	30	1.12469	0.025526	28.1172	0.63815
ArnB~P	168	172	YNERL	4	693.344	7.63975	0.007001	100	1.44853	0.016759	36.2132	0.418975
ArnB~P	168	172	YNERL	4	693.344	7.63383	0.006964	1000	2.0011	0.021912	50.0275	0.5478
ArnB~P	168	172	YNERL	4	693.344	7.60362	0.006547	10000	2.01594	0.035589	50.3985	0.889725
ArnA/ArnB~P	168	172	YNERL	4	693.344	7.64457	0.008567	0	0	0	0	0
ArnA/ArnB~P	168	172	YNERL	4	693.344	7.63974	0.000573	10	1.097	0.017235	27.4249	0.430875
ArnA/ArnB~P	168	172	YNERL	4	693.344	7.64603	0.006362	30	1.22501	0.025227	30.6252	0.630675
ArnA/ArnB~P	168	172	YNERL	4	693.344	7.6184	0.006708	100	1.53876	0.017718	38.4691	0.44295
ArnA/ArnB~P	168	172	YNERL	4	693.344	7.61108	0.013345	1000	2.04093	0.03788	51.0231	0.947
ArnA/ArnB~P	168	172	YNERL	4	693.344	7.60582	0.009823	10000	2.10732	0.043337	52.683	1.08343
ArnB	172	178	LLKVITD	6	800.5	8.28554	0.005974	0	0	0	0	0
ArnB	172	178	LLKVITD	6	800.5	8.31015	0.0183	10	0.068541	0.020808	1.14235	0.3468
ArnB	172	178	LLKVITD	6	800.5	8.3512	0.016889	30	0.041253	0.026043	0.68755	0.43405
ArnB	172	178	LLKVITD	6	800.5	8.33756	0.009875	100	0.036332	0.006807	0.605533	0.11345
ArnB	172	178	LLKVITD	6	800.5	8.35468	0.003294	1000	0.099593	0.008681	1.65988	0.144683
ArnB	172	178	LLKVITD	6	800.5	8.32954	0.01417	10000	0.548815	0.007155	9.14692	0.11925
ArnB~P	172	178	LLKVITD	6	800.5	8.23849	0.014052	0	0	0	0	0
ArnB~P	172	178	LLKVITD	6	800.5	8.26552	0.016741	10	0.10087	0.010727	1.68117	0.178783
ArnB~P	172	178	LLKVITD	6	800.5	8.28504	0.0329	30	0.100856	0.008315	1.68093	0.138583
ArnB~P	172	178	LLKVITD	6	800.5	8.33611	0.018433	100	0.120125	0.013259	2.00208	0.220983
ArnB~P	172	178	LLKVITD	6	800.5	8.28238	0.034666	1000	0.425395	0.009736	7.08992	0.162267
ArnB~P	172	178	LLKVITD	6	800.5	8.30334	0.004536	10000	1.45414	0.010207	24.2356	0.170117
ArnA/ArnB~P	172	178	LLKVITD	6	800.5	8.23718	0.009585	0	0	0	0	0
ArnA/ArnB~P	172	178	LLKVITD	6	800.5	8.27757	0.01409	10	0.126683	0.015738	2.11138	0.2623
ArnA/ArnB~P	172	178	LLKVITD	6	800.5	8.31348	0.000753	30	0.126838	0.012542	2.11397	0.209033
ArnA/ArnB~P	172	178	LLKVITD	6	800.5	8.29705	0.032327	100	0.154775	0.012004	2.57958	0.200067
ArnA/ArnB~P	172	178	LLKVITD	6	800.5	8.30118	0.008106	1000	0.494662	0.011661	8.24437	0.19435
ArnA/ArnB~P	172	178	LLKVITD	6	800.5	8.29305	0.020581	10000	1.57147	0.010935	26.1911	0.18225
ArnB	172	189	LLKVITDKTAGILYHVED	17	2027.13	9.07063	0.009097	0	0	0	0	0
ArnB	172	189	LLKVITDKTAGILYHVED	17	2027.13	9.0857	0.014083	10	1.76802	0.031236	10.4001	0.183741
ArnB	172	189	LLKVITDKTAGILYHVED	17	2027.13	9.10921	0.011505	30	1.99442	0.016657	11.7319	0.0979824
ArnB	172	189	LLKVITDKTAGILYHVED	17	2027.13	9.099	0.012674	100	2.44546	0.026451	14.3851	0.155594
ArnB	172	189	LLKVITDKTAGILYHVED	17	2027.13	9.10679	0.00366	1000	3.91904	0.018497	23.0532	0.108806
ArnB	172	189	LLKVITDKTAGILYHVED	17	2027.13	9.07415	0.005223	10000	5.75477	0.023248	33.8516	0.136753
ArnB~P	172	189	LLKVITDKTAGILYHVED	17	2027.13	9.05164	0.016807	0	0	0	0	0
ArnB~P	172	189	LLKVITDKTAGILYHVED	17	2027.13	9.0406	0.028507	10	3.24545	0.050714	19.0909	0.298318
ArnB~P	172	189	LLKVITDKTAGILYHVED	17	2027.13	9.06264	0.028119	30	3.67275	0.048314	21.6044	0.2842
ArnB~P	172	189	LLKVITDKTAGILYHVED	17	2027.13	9.07109	0.005962	100	4.27831	0.017209	25.1665	0.101229
ArnB~P	172	189	LLKVITDKTAGILYHVED	17	2027.13	9.05393	0.054723	1000	5.47203	0.043137	32.1884	0.253747
ArnB~P	172	189	LLKVITDKTAGILYHVED	17	2027.13	9.06791	0.010477	10000	7.24392	0.052928	42.6113	0.311341
ArnA/ArnB~P	172	189	LLKVITDKTAGILYHVED	17	2027.13	9.0417	0.011658	0	0	0	0	0
ArnA/ArnB~P	172	189	LLKVITDKTAGILYHVED	17	2027.13	9.05767	0.003483	10	3.45754	0.044808	20.3385	0.263576
ArnA/ArnB~P	172	189	LLKVITDKTAGILYHVED	17	2027.13	9.07901	0.006813	30	3.89784	0.011408	22.9284	0.0671059
ArnA/ArnB~P	172	189	LLKVITDKTAGILYHVED	17	2027.13	9.05549	0.037426	100	4.40116	0.028831	25.8892	0.169594
ArnA/ArnB~P	172	189	LLKVITDKTAGILYHVED	17	2027.13	9.07771	0.009084	1000	5.53552	0.023765	32.5619	0.139794
ArnA/ArnB~P	172	189	LLKVITDKTAGILYHVED	17	2027.13	9.06089	0.010428	10000	7.4631	0.053379	43.9006	0.313994
ArnB	173	178	LKVITD	5	687.416	7.5128	0.004667	0	0	0	0	0
ArnB	173	178	LKVITD	5	687.416	7.54938	0.027202	10	0.042997	0.007984	0.85994	0.15968
ArnB	173	178	LKVITD	5	687.416	7.59364	0.020849	30	0.04379	0.007595	0.8758	0.1519
ArnB	173	178	LKVITD	5	687.416	7.57669	0.009098	100	0.0457	0.003167	0.914	0.06334
ArnB	173	178	LKVITD	5	687.416	7.59551	0.001786	1000	0.116217	0.016515	2.32434	0.3303
ArnB	173	178	LKVITD	5	687.416	7.57238	0.016769	10000	0.534096	0.009887	10.6819	0.19774
ArnB~P	173	178	LKVITD	5	687.416	7.42022	0.014571	0	0	0	0	0
ArnB~P	173	178	LKVITD	5	687.416	7.47641	0.036025	10	0.068615	0.009342	1.3723	0.18684
ArnB~P	173	178	LKVITD	5	687.416	7.49024	0.035267	30	0.075052	0.006619	1.50104	0.13238
ArnB~P	173	178	LKVITD	5	687.416	7.56521	0.026691	100	0.102233	0.016385	2.04466	0.3277
ArnB~P	173	178	LKVITD	5	687.416	7.51061	0.026357	1000	0.355618	0.00155	7.11236	0.031
ArnB~P	173	178	LKVITD	5	687.416	7.52297	0.00694	10000	1.19926	0.006729	23.9852	0.13458
ArnA/ArnB~P	173	178	LKVITD	5	687.416	7.43044	0.0118	0	0	0	0	0
ArnA/ArnB~P	173	178	LKVITD	5	687.416	7.50231	0.021953	10	0.109752	0.013564	2.19504	0.27128
ArnA/ArnB~P	173	178	LKVITD	5	687.416	7.53937	0.007708	30	0.115072	0.017142	2.30144	0.34284
ArnA/ArnB~P	173	178	LKVITD	5	687.416	7.53252	0.028259	100	0.151639	0.012608	3.03278	0.25216
ArnA/ArnB~P	173	178	LKVITD	5	687.416	7.50598	0.007816	1000	0.430904	0.012721	8.61808	0.25442
ArnA/ArnB~P	173	178	LKVITD	5	687.416	7.53934	0.012128	10000	1.26467	0.011476	25.2935	0.22952
ArnB	173	189	LKVITDKTAGILYHVED	16	1914.05	8.64855	0.006898	0	0	0	0	0
ArnB	173	189	LKVITDKTAGILYHVED	16	1914.05	8.6724	0.015603	10	1.74885	0.027286	10.9303	0.170538
ArnB	173	189	LKVITDKTAGILYHVED	16	1914.05	8.71283	0.007314	30	1.95709	0.015685	12.2318	0.0980313
ArnB	173	189	LKVITDKTAGILYHVED	16	1914.05	8.70004	0.006156	100	2.39666	0.040819	14.9791	0.255119
ArnB	173	189	LKVITDKTAGILYHVED	16	1914.05	8.71333	0.007622	1000	3.92523	0.021167	24.5327	0.132294
ArnB	173	189	LKVITDKTAGILYHVED	16	1914.05	8.68348	0.012795	10000	5.63192	0.027005	35.1995	0.168781
ArnB~P	173	189	LKVITDKTAGILYHVED	16	1914.05	8.62431	0.013727	0	0	0	0	0
ArnB~P	173	189	LKVITDKTAGILYHVED	16	1914.05	8.6267	0.020232	10	3.21026	0.058606	20.0641	0.366287
ArnB~P	173	189	LKVITDKTAGILYHVED	16	1914.05	8.65062	0.033431	30	3.66076	0.087292	22.8798	0.545575
ArnB~P	173	189	LKVITDKTAGILYHVED	16	1914.05	8.683	0.012574	100	4.15599	0.042775	25.9749	0.267344
ArnB~P	173	189	LKVITDKTAGILYHVED	16	1914.05	8.64641	0.045426	1000	5.32339	0.016064	33.2712	0.1004
ArnB~P	173	189	LKVITDKTAGILYHVED	16	1914.05	8.65815	0.005996	10000	6.99787	0.017829	43.7367	0.111431
ArnA/ArnB~P	173	189	LKVITDKTAGILYHVED	16	1914.05	8.62088	0.010835	0	0	0	0	0
ArnA/ArnB~P	173	189	LKVITDKTAGILYHVED	16	1914.05	8.64551	0.002669	10	3.41169	0.054023	21.3231	0.337644
ArnA/ArnB~P	173	189	LKVITDKTAGILYHVED	16	1914.05	8.68393	0.007515	30	3.78455	0.012518	23.6534	0.0782375
ArnA/ArnB~P	173	189	LKVITDKTAGILYHVED	16	1914.05	8.64534	0.041419	100	4.32987	0.044734	27.0617	0.279588
ArnA/ArnB~P	173	189	LKVITDKTAGILYHVED	16	1914.05	8.66789	0.010247	1000	5.31463	0.028577	33.2164	0.178606
ArnA/ArnB~P	173	189	LKVITDKTAGILYHVED	16	1914.05	8.64976	0.00504	10000	7.12491	0.034479	44.5307	0.215494
ArnB	173	192	LKVITDKTAGILYHVEDAKE	19	2242.22	8.45301	0.002363	0	0	0	0	0
ArnB	173	192	LKVITDKTAGILYHVEDAKE	19	2242.22	8.46933	0.004851	10	3.07913	0.037593	16.2059	0.197858
ArnB	173	192	LKVITDKTAGILYHVEDAKE	19	2242.22	8.45374	0.005129	30	3.31775	0.016723	17.4619	0.0880158
ArnB	173	192	LKVITDKTAGILYHVEDAKE	19	2242.22	8.44868	0.010314	100	3.83147	0.026159	20.1657	0.137679
ArnB	173	192	LKVITDKTAGILYHVEDAKE	19	2242.22	8.45937	0.004935	1000	5.3286	0.017039	28.0453	0.0896789
ArnB	173	192	LKVITDKTAGILYHVEDAKE	19	2242.22	8.46471	0.014793	10000	7.07878	0.134048	37.2567	0.705516
ArnB~P	173	192	LKVITDKTAGILYHVEDAKE	19	2242.22	8.55383	0.012089	0	0	0	0	0
ArnB~P	173	192	LKVITDKTAGILYHVEDAKE	19	2242.22	8.53509	0.006652	10	5.07034	0.054558	26.686	0.287147
ArnB~P	173	192	LKVITDKTAGILYHVEDAKE	19	2242.22	8.52706	0.003103	30	5.55794	0.048295	29.2523	0.254184
ArnB~P	173	192	LKVITDKTAGILYHVEDAKE	19	2242.22	8.48836	0.008093	100	6.00104	0.033479	31.5844	0.176205
ArnB~P	173	192	LKVITDKTAGILYHVEDAKE	19	2242.22	8.47263	0.00708	1000	7.36156	0.106406	38.7451	0.560032
ArnB~P	173	192	LKVITDKTAGILYHVEDAKE	19	2242.22	8.44688	0.004549	10000	8.68024	0.026484	45.6855	0.139389
ArnA/ArnB~P	173	192	LKVITDKTAGILYHVEDAKE	19	2242.22	8.54395	0.00698	0	0	0	0	0
ArnA/ArnB~P	173	192	LKVITDKTAGILYHVEDAKE	19	2242.22	8.50245	0.001562	10	5.22437	0.050775	27.4967	0.267237
ArnA/ArnB~P	173	192	LKVITDKTAGILYHVEDAKE	19	2242.22	8.49898	0.004013	30	5.92104	0.024574	31.1633	0.129337
ArnA/ArnB~P	173	192	LKVITDKTAGILYHVEDAKE	19	2242.22	8.46223	0.006736	100	6.09713	0.023797	32.0901	0.125247
ArnA/ArnB~P	173	192	LKVITDKTAGILYHVEDAKE	19	2242.22	8.44938	0.015122	1000	7.19073	0.194569	37.8459	1.02405
ArnA/ArnB~P	173	192	LKVITDKTAGILYHVEDAKE	19	2242.22	8.44727	0.00926	10000	9.05727	0.238746	47.6699	1.25656
ArnB	174	189	KVITDKTAGILYHVED	15	1800.96	8.30869	0.007306	0	0	0	0	0
ArnB	174	189	KVITDKTAGILYHVED	15	1800.96	8.33296	0.017797	10	1.70234	0.042064	11.3489	0.280427
ArnB	174	189	KVITDKTAGILYHVED	15	1800.96	8.38365	0.01748	30	1.9284	0.026212	12.856	0.174747
ArnB	174	189	KVITDKTAGILYHVED	15	1800.96	8.36902	0.011472	100	2.33733	0.027521	15.5822	0.183473
ArnB	174	189	KVITDKTAGILYHVED	15	1800.96	8.38356	0.002948	1000	3.76157	0.026249	25.0772	0.174993
ArnB	174	189	KVITDKTAGILYHVED	15	1800.96	8.35437	0.010854	10000	5.12352	0.036773	34.1568	0.245153
ArnB~P	174	189	KVITDKTAGILYHVED	15	1800.96	8.27268	0.009911	0	0	0	0	0
ArnB~P	174	189	KVITDKTAGILYHVED	15	1800.96	8.28551	0.013061	10	3.09122	0.018605	20.6081	0.124033
ArnB~P	174	189	KVITDKTAGILYHVED	15	1800.96	8.29947	0.032673	30	3.52058	0.078825	23.4705	0.5255
ArnB~P	174	189	KVITDKTAGILYHVED	15	1800.96	8.34583	0.018357	100	4.07526	0.050968	27.1684	0.339787
ArnB~P	174	189	KVITDKTAGILYHVED	15	1800.96	8.29328	0.036898	1000	5.08644	0.089558	33.9096	0.597053
ArnB~P	174	189	KVITDKTAGILYHVED	15	1800.96	8.31621	0.006076	10000	6.35841	0.043519	42.3894	0.290127
ArnA/ArnB~P	174	189	KVITDKTAGILYHVED	15	1800.96	8.25927	0.010082	0	0	0	0	0
ArnA/ArnB~P	174	189	KVITDKTAGILYHVED	15	1800.96	8.28422	0.010947	10	3.37916	0.040417	22.5277	0.269447
ArnA/ArnB~P	174	189	KVITDKTAGILYHVED	15	1800.96	8.31565	0.001313	30	3.76828	0.117711	25.1218	0.78474
ArnA/ArnB~P	174	189	KVITDKTAGILYHVED	15	1800.96	8.29357	0.033925	100	4.32109	0.089513	28.8073	0.596753
ArnA/ArnB~P	174	189	KVITDKTAGILYHVED	15	1800.96	8.30193	0.008129	1000	5.27977	0.041719	35.1985	0.278127
ArnA/ArnB~P	174	189	KVITDKTAGILYHVED	15	1800.96	8.29829	0.021082	10000	6.75134	0.052083	45.0089	0.34722
ArnB	180	188	TAGILYHVE	8	1001.52	8.74737	0.006768	0	0	0	0	0
ArnB	180	188	TAGILYHVE	8	1001.52	8.76574	0.013077	10	1.0353	0.018684	12.9412	0.23355
ArnB	180	188	TAGILYHVE	8	1001.52	8.80815	0.007413	30	1.14194	0.013016	14.2743	0.1627
ArnB	180	188	TAGILYHVE	8	1001.52	8.79358	0.009809	100	1.2341	0.012707	15.4262	0.158837
ArnB	180	188	TAGILYHVE	8	1001.52	8.81248	0.005057	1000	1.49085	0.015648	18.6356	0.1956
ArnB	180	188	TAGILYHVE	8	1001.52	8.77611	0.01171	10000	2.70232	0.015046	33.779	0.188075
ArnB~P	180	188	TAGILYHVE	8	1001.52	8.71466	0.015816	0	0	0	0	0
ArnB~P	180	188	TAGILYHVE	8	1001.52	8.72864	0.017238	10	1.47343	0.02339	18.4178	0.292375
ArnB~P	180	188	TAGILYHVE	8	1001.52	8.74605	0.025512	30	1.77704	0.02495	22.213	0.311875
ArnB~P	180	188	TAGILYHVE	8	1001.52	8.77733	0.010712	100	2.143	0.024252	26.7875	0.30315
ArnB~P	180	188	TAGILYHVE	8	1001.52	8.74866	0.039411	1000	2.66387	0.020722	33.2984	0.259025
ArnB~P	180	188	TAGILYHVE	8	1001.52	8.76138	0.005971	10000	3.59401	0.017849	44.9252	0.223112
ArnA/ArnB~P	180	188	TAGILYHVE	8	1001.52	8.70011	0.013348	0	0	0	0	0
ArnA/ArnB~P	180	188	TAGILYHVE	8	1001.52	8.73127	0.005342	10	1.63154	0.022376	20.3942	0.2797
ArnA/ArnB~P	180	188	TAGILYHVE	8	1001.52	8.76872	0.005106	30	1.99335	0.017494	24.9169	0.218675
ArnA/ArnB~P	180	188	TAGILYHVE	8	1001.52	8.74296	0.03287	100	2.3584	0.022794	29.48	0.284925
ArnA/ArnB~P	180	188	TAGILYHVE	8	1001.52	8.75538	0.007525	1000	2.74001	0.017953	34.2501	0.224413
ArnA/ArnB~P	180	188	TAGILYHVE	8	1001.52	8.74959	0.006476	10000	3.78386	0.018302	47.2982	0.228775
ArnB	182	188	GILYHVE	6	829.433	8.57957	0.006693	0	0	0	0	0
ArnB	182	188	GILYHVE	6	829.433	8.59381	0.013796	10	0.968488	0.024599	16.1415	0.409983
ArnB	182	188	GILYHVE	6	829.433	8.65006	0.002988	30	1.06831	0.005111	17.8051	0.0851833
ArnB	182	188	GILYHVE	6	829.433	8.62722	0.012657	100	1.14287	0.012408	19.0479	0.2068
ArnB	182	188	GILYHVE	6	829.433	8.64733	0.006842	1000	1.30926	0.029256	21.821	0.4876
ArnB	182	188	GILYHVE	6	829.433	8.61557	0.014499	10000	2.13365	0.023905	35.5609	0.398417
ArnB~P	182	188	GILYHVE	6	829.433	8.54066	0.016115	0	0	0	0	0
ArnB~P	182	188	GILYHVE	6	829.433	8.55565	0.01689	10	1.34301	0.016934	22.3835	0.282233
ArnB~P	182	188	GILYHVE	6	829.433	8.57416	0.028369	30	1.56165	0.02555	26.0275	0.425833
ArnB~P	182	188	GILYHVE	6	829.433	8.61304	0.014811	100	1.83764	0.015908	30.6273	0.265133
ArnB~P	182	188	GILYHVE	6	829.433	8.57103	0.037501	1000	2.18492	0.022871	36.4154	0.381183
ArnB~P	182	188	GILYHVE	6	829.433	8.59061	0.005144	10000	2.65726	0.011965	44.2876	0.199417
ArnA/ArnB~P	182	188	GILYHVE	6	829.433	8.52311	0.014543	0	0	0	0	0
ArnA/ArnB~P	182	188	GILYHVE	6	829.433	8.5579	0.009112	10	1.43201	0.013409	23.8669	0.223483
ArnA/ArnB~P	182	188	GILYHVE	6	829.433	8.59242	0.002048	30	1.69861	0.01159	28.3102	0.193167
ArnA/ArnB~P	182	188	GILYHVE	6	829.433	8.56948	0.03138	100	1.97231	0.017429	32.8718	0.290483
ArnA/ArnB~P	182	188	GILYHVE	6	829.433	8.57941	0.007148	1000	2.173	0.011845	36.2167	0.197417
ArnA/ArnB~P	182	188	GILYHVE	6	829.433	8.57456	0.012624	10000	2.73923	0.01992	45.6538	0.332
ArnB	183	188	ILYHVE	5	772.411	8.09571	0.004887	0	0	0	0	0
ArnB	183	188	ILYHVE	5	772.411	8.12259	0.023801	10	0.764093	0.017551	15.2819	0.35102
ArnB	183	188	ILYHVE	5	772.411	8.16859	0.020056	30	0.875217	0.018364	17.5043	0.36728
ArnB	183	188	ILYHVE	5	772.411	8.15408	0.009978	100	0.948022	0.013379	18.9604	0.26758
ArnB	183	188	ILYHVE	5	772.411	8.17094	0.001239	1000	1.00822	0.01626	20.1645	0.3252
ArnB	183	188	ILYHVE	5	772.411	8.14796	0.014602	10000	1.30661	0.01584	26.1322	0.3168
ArnB~P	183	188	ILYHVE	5	772.411	8.03766	0.018187	0	0	0	0	0
ArnB~P	183	188	ILYHVE	5	772.411	8.06703	0.01695	10	1.00474	0.034984	20.0949	0.69968
ArnB~P	183	188	ILYHVE	5	772.411	8.08685	0.031643	30	1.12509	0.019461	22.5018	0.38922
ArnB~P	183	188	ILYHVE	5	772.411	8.14075	0.020898	100	1.28978	0.028631	25.7956	0.57262
ArnB~P	183	188	ILYHVE	5	772.411	8.0852	0.030574	1000	1.50137	0.016585	30.0274	0.3317
ArnB~P	183	188	ILYHVE	5	772.411	8.10475	0.004441	10000	1.83893	0.01588	36.7785	0.3176
ArnA/ArnB~P	183	188	ILYHVE	5	772.411	8.03766	0.009983	0	0	0	0	0
ArnA/ArnB~P	183	188	ILYHVE	5	772.411	8.07661	0.017477	10	1.06614	0.011409	21.3228	0.22818
ArnA/ArnB~P	183	188	ILYHVE	5	772.411	8.11377	0.005123	30	1.23497	0.010798	24.6994	0.21596
ArnA/ArnB~P	183	188	ILYHVE	5	772.411	8.10345	0.032572	100	1.41716	0.019742	28.3432	0.39484
ArnA/ArnB~P	183	188	ILYHVE	5	772.411	8.09363	0.007595	1000	1.54472	0.008011	30.8945	0.16022
ArnA/ArnB~P	183	188	ILYHVE	5	772.411	8.10419	0.018539	10000	1.94646	0.009523	38.9292	0.19046
ArnB	183	189	ILYHVED	6	887.438	8.08564	0.005834	0	0	0	0	0
ArnB	183	189	ILYHVED	6	887.438	8.11679	0.023716	10	1.46077	0.013751	24.3461	0.229183
ArnB	183	189	ILYHVED	6	887.438	8.16193	0.019862	30	1.63504	0.021608	27.2507	0.360133
ArnB	183	189	ILYHVED	6	887.438	8.14338	0.007	100	1.6916	0.030592	28.1934	0.509867
ArnB	183	189	ILYHVED	6	887.438	8.16258	0.001366	1000	1.73951	0.022312	28.9918	0.371867
ArnB	183	189	ILYHVED	6	887.438	8.14076	0.014708	10000	2.10138	0.01319	35.023	0.219833
ArnB~P	183	189	ILYHVED	6	887.438	8.02833	0.015773	0	0	0	0	0
ArnB~P	183	189	ILYHVED	6	887.438	8.06466	0.016665	10	1.6562	0.022808	27.6034	0.380133
ArnB~P	183	189	ILYHVED	6	887.438	8.08306	0.030995	30	1.82063	0.026966	30.3439	0.449433
ArnB~P	183	189	ILYHVED	6	887.438	8.13784	0.020076	100	1.94932	0.023359	32.4887	0.389317
ArnB~P	183	189	ILYHVED	6	887.438	8.08418	0.03088	1000	2.15558	0.019422	35.9263	0.3237
ArnB~P	183	189	ILYHVED	6	887.438	8.10089	0.005141	10000	2.42711	0.016905	40.4518	0.28175
ArnA/ArnB~P	183	189	ILYHVED	6	887.438	8.02563	0.007572	0	0	0	0	0
ArnA/ArnB~P	183	189	ILYHVED	6	887.438	8.0728	0.015563	10	1.63012	0.008523	27.1687	0.14205
ArnA/ArnB~P	183	189	ILYHVED	6	887.438	8.10957	0.003885	30	1.80954	0.011007	30.159	0.18345
ArnA/ArnB~P	183	189	ILYHVED	6	887.438	8.09944	0.033537	100	2.03105	0.011047	33.8508	0.184117
ArnA/ArnB~P	183	189	ILYHVED	6	887.438	8.09142	0.008346	1000	2.18466	0.006718	36.411	0.111967
ArnA/ArnB~P	183	189	ILYHVED	6	887.438	8.09929	0.017271	10000	2.48368	0.012629	41.3947	0.210483
ArnB	184	188	LYHVE	4	659.327	8.09427	0.004861	0	0	0	0	0
ArnB	184	188	LYHVE	4	659.327	8.12181	0.023257	10	0.699224	0.005455	17.4806	0.136375
ArnB	184	188	LYHVE	4	659.327	8.17042	0.021974	30	0.785276	0.004765	19.6319	0.119125
ArnB	184	188	LYHVE	4	659.327	8.15615	0.010015	100	0.862528	0.009519	21.5632	0.237975
ArnB	184	188	LYHVE	4	659.327	8.1724	0.001361	1000	0.869257	0.003943	21.7314	0.098575
ArnB	184	188	LYHVE	4	659.327	8.14984	0.013584	10000	1.14198	0.007676	28.5495	0.1919
ArnB~P	184	188	LYHVE	4	659.327	8.03793	0.018786	0	0	0	0	0
ArnB~P	184	188	LYHVE	4	659.327	8.06873	0.017402	10	0.892174	0.015972	22.3043	0.3993
ArnB~P	184	188	LYHVE	4	659.327	8.08724	0.030969	30	0.991931	0.008543	24.7983	0.213575
ArnB~P	184	188	LYHVE	4	659.327	8.14242	0.019748	100	1.12993	0.014653	28.2483	0.366325
ArnB~P	184	188	LYHVE	4	659.327	8.08664	0.030648	1000	1.33282	0.0131	33.3205	0.3275
ArnB~P	184	188	LYHVE	4	659.327	8.10608	0.005689	10000	1.60667	0.005969	40.1668	0.149225
ArnA/ArnB~P	184	188	LYHVE	4	659.327	8.11053	0.187079	0	0	0	0	0
ArnA/ArnB~P	184	188	LYHVE	4	659.327	8.07504	0.017881	10	0.887539	0.031732	22.1885	0.7933
ArnA/ArnB~P	184	188	LYHVE	4	659.327	8.11194	0.003019	30	1.01831	0.037889	25.4578	0.947225
ArnA/ArnB~P	184	188	LYHVE	4	659.327	8.10108	0.032002	100	1.2011	0.032909	30.0276	0.822725
ArnA/ArnB~P	184	188	LYHVE	4	659.327	8.09273	0.008958	1000	1.32963	0.031238	33.2408	0.78095
ArnA/ArnB~P	184	188	LYHVE	4	659.327	8.10372	0.018694	10000	1.65815	0.030609	41.4537	0.765225
ArnB	185	192	YHVEDAKE	7	989.445	6.26303	0.026109	0	0	0	0	0
ArnB	185	192	YHVEDAKE	7	989.445	6.26353	0.013549	10	1.79069	0.03994	25.5813	0.570571
ArnB	185	192	YHVEDAKE	7	989.445	6.23775	0.019946	30	1.8855	0.02198	26.9357	0.314
ArnB	185	192	YHVEDAKE	7	989.445	6.22843	0.012509	100	1.98948	0.029285	28.4212	0.418357
ArnB	185	192	YHVEDAKE	7	989.445	6.2282	0.020791	1000	2.03638	0.073685	29.0912	1.05264
ArnB	185	192	YHVEDAKE	7	989.445	6.24243	0.008503	10000	2.14573	0.076295	30.6533	1.08993
ArnB~P	185	192	YHVEDAKE	7	989.445	6.45552	0.008475	0	0	0	0	0
ArnB~P	185	192	YHVEDAKE	7	989.445	6.4536	0.003798	10	2.40947	0.023617	34.421	0.337386
ArnB~P	185	192	YHVEDAKE	7	989.445	6.45047	0.001305	30	2.5542	0.053079	36.4885	0.758271
ArnB~P	185	192	YHVEDAKE	7	989.445	6.40361	0.015812	100	2.55958	0.027802	36.5654	0.397171
ArnB~P	185	192	YHVEDAKE	7	989.445	6.37952	0.010918	1000	2.7543	0.03818	39.3471	0.545429
ArnB~P	185	192	YHVEDAKE	7	989.445	6.3051	0.028047	10000	2.70605	0.025837	38.6579	0.3691
ArnA/ArnB~P	185	192	YHVEDAKE	7	989.445	6.45137	0.00617	0	0	0	0	0
ArnA/ArnB~P	185	192	YHVEDAKE	7	989.445	6.43544	0.003345	10	2.35348	0.023398	33.6211	0.334257
ArnA/ArnB~P	185	192	YHVEDAKE	7	989.445	6.42658	0.005897	30	2.56823	0.028758	36.689	0.410829
ArnA/ArnB~P	185	192	YHVEDAKE	7	989.445	6.37679	0.008174	100	2.57187	0.021207	36.741	0.302957
ArnA/ArnB~P	185	192	YHVEDAKE	7	989.445	6.3388	0.015042	1000	2.63838	0.031594	37.6911	0.451343
ArnA/ArnB~P	185	192	YHVEDAKE	7	989.445	6.30325	0.01277	10000	2.77085	0.12653	39.5836	1.80757
ArnB	193	201	IAEMLPQSA	7	958.479	8.59753	0.005078	0	0	0	0	0
ArnB	193	201	IAEMLPQSA	7	958.479	8.60054	0.004167	10	2.87969	0.054512	41.1384	0.778743
ArnB	193	201	IAEMLPQSA	7	958.479	8.58626	0.007143	30	3.10892	0.031219	44.4132	0.445986
ArnB	193	201	IAEMLPQSA	7	958.479	8.58375	0.007586	100	3.19961	0.060402	45.7087	0.862886
ArnB	193	201	IAEMLPQSA	7	958.479	8.59479	0.004833	1000	3.48774	0.011976	49.8249	0.171086
ArnB	193	201	IAEMLPQSA	7	958.479	8.6079	0.014016	10000	3.97653	0.085925	56.8075	1.2275
ArnB~P	193	201	IAEMLPQSA	7	958.479	8.62556	0.004828	0	0	0	0	0
ArnB~P	193	201	IAEMLPQSA	7	958.479	8.62172	0.00369	10	3.25378	0.036764	46.4825	0.5252
ArnB~P	193	201	IAEMLPQSA	7	958.479	8.63912	0.004332	30	3.78358	0.02806	54.0512	0.400857
ArnB~P	193	201	IAEMLPQSA	7	958.479	8.6102	0.007364	100	3.59911	0.027608	51.4159	0.3944
ArnB~P	193	201	IAEMLPQSA	7	958.479	8.61118	0.005726	1000	3.99573	0.063871	57.0819	0.912443
ArnB~P	193	201	IAEMLPQSA	7	958.479	8.59358	0.003919	10000	3.89446	0.032407	55.6352	0.462957
ArnA/ArnB~P	193	201	IAEMLPQSA	7	958.479	8.62285	0.004816	0	0	0	0	0
ArnA/ArnB~P	193	201	IAEMLPQSA	7	958.479	8.60816	0.00241	10	3.35778	0.02197	47.9683	0.313857
ArnA/ArnB~P	193	201	IAEMLPQSA	7	958.479	8.61795	0.002831	30	3.92354	0.016452	56.0506	0.235029
ArnA/ArnB~P	193	201	IAEMLPQSA	7	958.479	8.59316	0.003695	100	3.64848	0.011531	52.1212	0.164729
ArnA/ArnB~P	193	201	IAEMLPQSA	7	958.479	8.59302	0.012791	1000	3.83216	0.120938	54.7452	1.72769
ArnA/ArnB~P	193	201	IAEMLPQSA	7	958.479	8.59849	0.009743	10000	4.07863	0.137725	58.2662	1.9675
ArnB	193	213	IAEMLPQSAVTEIGAKNVSID	19	2185.13	9.29145	0.005078	0	0	0	0	0
ArnB	193	213	IAEMLPQSAVTEIGAKNVSID	19	2185.13	9.28242	0.010196	10	6.13635	0.089819	32.2966	0.472732
ArnB	193	213	IAEMLPQSAVTEIGAKNVSID	19	2185.13	9.27059	0.006945	30	6.89551	0.038428	36.2922	0.202253
ArnB	193	213	IAEMLPQSAVTEIGAKNVSID	19	2185.13	9.26098	0.00818	100	7.87959	0.027757	41.4715	0.146089
ArnB	193	213	IAEMLPQSAVTEIGAKNVSID	19	2185.13	9.26927	0.004395	1000	9.50539	0.012984	50.0283	0.0683368
ArnB	193	213	IAEMLPQSAVTEIGAKNVSID	19	2185.13	9.26264	0.010473	10000	10.6516	0.258798	56.0608	1.36209
ArnB~P	193	213	IAEMLPQSAVTEIGAKNVSID	19	2185.13	9.32808	0.003626	0	0	0	0	0
ArnB~P	193	213	IAEMLPQSAVTEIGAKNVSID	19	2185.13	9.31003	0.003643	10	8.54831	0.100003	44.9911	0.526332
ArnB~P	193	213	IAEMLPQSAVTEIGAKNVSID	19	2185.13	9.31188	0.003885	30	9.58144	0.091642	50.4286	0.482326
ArnB~P	193	213	IAEMLPQSAVTEIGAKNVSID	19	2185.13	9.29051	0.009611	100	9.51136	0.053809	50.0598	0.283205
ArnB~P	193	213	IAEMLPQSAVTEIGAKNVSID	19	2185.13	9.28588	0.007516	1000	11.2787	0.124512	59.3618	0.655326
ArnB~P	193	213	IAEMLPQSAVTEIGAKNVSID	19	2185.13	9.27312	0.005035	10000	11.3722	0.050045	59.8535	0.263395
ArnA/ArnB~P	193	213	IAEMLPQSAVTEIGAKNVSID	19	2185.13	9.31969	0.008102	0	0	0	0	0
ArnA/ArnB~P	193	213	IAEMLPQSAVTEIGAKNVSID	19	2185.13	9.28274	0.003307	10	8.67586	0.036206	45.6624	0.190558
ArnA/ArnB~P	193	213	IAEMLPQSAVTEIGAKNVSID	19	2185.13	9.28914	0.002934	30	9.83402	0.070461	51.758	0.370847
ArnA/ArnB~P	193	213	IAEMLPQSAVTEIGAKNVSID	19	2185.13	9.26712	0.003002	100	9.47662	0.01319	49.8769	0.0694211
ArnA/ArnB~P	193	213	IAEMLPQSAVTEIGAKNVSID	19	2185.13	9.26554	0.011921	1000	10.7786	0.300959	56.7292	1.58399
ArnA/ArnB~P	193	213	IAEMLPQSAVTEIGAKNVSID	19	2185.13	9.27077	0.009946	10000	11.8229	0.386684	62.2257	2.03518
ArnB	195	201	EMLPQSA	5	774.358	8.01692	0.006031	0	0	0	0	0
ArnB	195	201	EMLPQSA	5	774.358	8.02739	0.019288	10	1.72898	0.010988	34.5796	0.21976
ArnB	195	201	EMLPQSA	5	774.358	8.05151	0.016003	30	1.92221	0.009662	38.4442	0.19324
ArnB	195	201	EMLPQSA	5	774.358	8.03927	0.004752	100	1.94637	0.009902	38.9273	0.19804
ArnB	195	201	EMLPQSA	5	774.358	8.0531	0.002156	1000	2.19719	0.018875	43.9438	0.3775
ArnB	195	201	EMLPQSA	5	774.358	8.03892	0.011406	10000	2.61219	0.013318	52.2439	0.26636
ArnB~P	195	201	EMLPQSA	5	774.358	7.93734	0.012626	0	0	0	0	0
ArnB~P	195	201	EMLPQSA	5	774.358	7.9777	0.032857	10	2.16999	0.024085	43.3997	0.4817
ArnB~P	195	201	EMLPQSA	5	774.358	8.01007	0.040348	30	2.3106	0.040936	46.212	0.81872
ArnB~P	195	201	EMLPQSA	5	774.358	8.06539	0.018012	100	2.34313	0.022328	46.8627	0.44656
ArnB~P	195	201	EMLPQSA	5	774.358	8.0165	0.038551	1000	2.48776	0.013091	49.7552	0.26182
ArnB~P	195	201	EMLPQSA	5	774.358	8.04089	0.002869	10000	2.5883	0.021384	51.7659	0.42768
ArnA/ArnB~P	195	201	EMLPQSA	5	774.358	7.94051	0.007703	0	0	0	0	0
ArnA/ArnB~P	195	201	EMLPQSA	5	774.358	8.00394	0.02534	10	2.23613	0.011493	44.7226	0.22986
ArnA/ArnB~P	195	201	EMLPQSA	5	774.358	8.04514	0.003636	30	2.40299	0.025524	48.0599	0.51048
ArnA/ArnB~P	195	201	EMLPQSA	5	774.358	8.03832	0.030386	100	2.38742	0.027028	47.7483	0.54056
ArnA/ArnB~P	195	201	EMLPQSA	5	774.358	8.0343	0.007597	1000	2.48897	0.013757	49.7794	0.27514
ArnA/ArnB~P	195	201	EMLPQSA	5	774.358	8.04263	0.014596	10000	2.64792	0.011726	52.9583	0.23452
ArnB	195	213	EMLPQSAVTEIGAKNVSID	17	2001.01	9.07226	0.007987	0	0	0	0	0
ArnB	195	213	EMLPQSAVTEIGAKNVSID	17	2001.01	9.06278	0.008139	10	4.89875	0.034789	28.8162	0.204641
ArnB	195	213	EMLPQSAVTEIGAKNVSID	17	2001.01	9.07521	0.012275	30	5.62848	0.049961	33.1087	0.293888
ArnB	195	213	EMLPQSAVTEIGAKNVSID	17	2001.01	9.07052	0.005093	100	6.56708	0.028853	38.6299	0.169724
ArnB	195	213	EMLPQSAVTEIGAKNVSID	17	2001.01	9.07839	0.00622	1000	8.23839	0.021575	48.4611	0.126912
ArnB	195	213	EMLPQSAVTEIGAKNVSID	17	2001.01	9.05547	0.005785	10000	9.24449	0.024946	54.3793	0.146741
ArnB~P	195	213	EMLPQSAVTEIGAKNVSID	17	2001.01	9.0408	0.016072	0	0	0	0	0
ArnB~P	195	213	EMLPQSAVTEIGAKNVSID	17	2001.01	9.02365	0.025289	10	7.27685	0.037496	42.805	0.220565
ArnB~P	195	213	EMLPQSAVTEIGAKNVSID	17	2001.01	9.04976	0.026616	30	7.76703	0.097035	45.6884	0.570794
ArnB~P	195	213	EMLPQSAVTEIGAKNVSID	17	2001.01	9.06135	0.005169	100	8.15119	0.044956	47.9482	0.264447
ArnB~P	195	213	EMLPQSAVTEIGAKNVSID	17	2001.01	9.05197	0.051669	1000	9.26315	0.024372	54.4891	0.143365
ArnB~P	195	213	EMLPQSAVTEIGAKNVSID	17	2001.01	9.07122	0.009555	10000	9.90889	0.030926	58.2876	0.181918
ArnA/ArnB~P	195	213	EMLPQSAVTEIGAKNVSID	17	2001.01	9.02877	0.012376	0	0	0	0	0
ArnA/ArnB~P	195	213	EMLPQSAVTEIGAKNVSID	17	2001.01	9.04179	0.004239	10	7.42548	0.008468	43.6793	0.0498118
ArnA/ArnB~P	195	213	EMLPQSAVTEIGAKNVSID	17	2001.01	9.06816	0.006964	30	7.8352	0.023905	46.0894	0.140618
ArnA/ArnB~P	195	213	EMLPQSAVTEIGAKNVSID	17	2001.01	9.0458	0.036374	100	8.22556	0.015707	48.3857	0.0923941
ArnA/ArnB~P	195	213	EMLPQSAVTEIGAKNVSID	17	2001.01	9.07112	0.008949	1000	9.34054	0.010047	54.9444	0.0591
ArnA/ArnB~P	195	213	EMLPQSAVTEIGAKNVSID	17	2001.01	9.06338	0.007721	10000	10.0871	0.041824	59.3359	0.246024
ArnB	196	213	MLPQSAVTEIGAKNVSID	16	1871.97	8.87744	0.007533	0	0	0	0	0
ArnB	196	213	MLPQSAVTEIGAKNVSID	16	1871.97	8.87596	0.008252	10	4.797	0.037805	29.9812	0.236281
ArnB	196	213	MLPQSAVTEIGAKNVSID	16	1871.97	8.89245	0.012759	30	5.5488	0.023695	34.68	0.148094
ArnB	196	213	MLPQSAVTEIGAKNVSID	16	1871.97	8.88456	0.008676	100	6.44409	0.076758	40.2756	0.479738
ArnB	196	213	MLPQSAVTEIGAKNVSID	16	1871.97	8.89702	0.003495	1000	7.91008	0.058724	49.438	0.367025
ArnB	196	213	MLPQSAVTEIGAKNVSID	16	1871.97	8.8716	0.010107	10000	8.55418	0.024897	53.4636	0.155606
ArnB~P	196	213	MLPQSAVTEIGAKNVSID	16	1871.97	8.84372	0.014323	0	0	0	0	0
ArnB~P	196	213	MLPQSAVTEIGAKNVSID	16	1871.97	8.84323	0.020939	10	6.92174	0.07693	43.2609	0.480812
ArnB~P	196	213	MLPQSAVTEIGAKNVSID	16	1871.97	8.86395	0.025724	30	7.36026	0.081696	46.0016	0.5106
ArnB~P	196	213	MLPQSAVTEIGAKNVSID	16	1871.97	8.88385	0.005477	100	7.68479	0.034818	48.03	0.217613
ArnB~P	196	213	MLPQSAVTEIGAKNVSID	16	1871.97	8.86445	0.047454	1000	8.73164	0.035725	54.5728	0.223281
ArnB~P	196	213	MLPQSAVTEIGAKNVSID	16	1871.97	8.88193	0.007226	10000	9.30096	0.02857	58.131	0.178563
ArnA/ArnB~P	196	213	MLPQSAVTEIGAKNVSID	16	1871.97	8.83664	0.012618	0	0	0	0	0
ArnA/ArnB~P	196	213	MLPQSAVTEIGAKNVSID	16	1871.97	8.8545	0.002782	10	6.90223	0.014626	43.1389	0.0914125
ArnA/ArnB~P	196	213	MLPQSAVTEIGAKNVSID	16	1871.97	8.88703	0.005683	30	7.27772	0.026716	45.4857	0.166975
ArnA/ArnB~P	196	213	MLPQSAVTEIGAKNVSID	16	1871.97	8.85676	0.038374	100	7.75539	0.017321	48.4712	0.108256
ArnA/ArnB~P	196	213	MLPQSAVTEIGAKNVSID	16	1871.97	8.88151	0.008524	1000	8.78646	0.031453	54.9154	0.196581
ArnA/ArnB~P	196	213	MLPQSAVTEIGAKNVSID	16	1871.97	8.87042	0.004447	10000	9.44124	0.018227	59.0077	0.113919
ArnB	202	208	VTEIGAK	6	716.406	6.40239	0.023033	0	0	0	0	0
ArnB	202	208	VTEIGAK	6	716.406	6.43921	0.020578	10	1.30677	0.011001	21.7794	0.18335
ArnB	202	208	VTEIGAK	6	716.406	6.49612	0.024119	30	1.56521	0.017003	26.0868	0.283383
ArnB	202	208	VTEIGAK	6	716.406	6.47532	0.014084	100	2.06042	0.016842	34.3404	0.2807
ArnB	202	208	VTEIGAK	6	716.406	6.49452	0.011742	1000	3.10666	0.017912	51.7776	0.298533
ArnB	202	208	VTEIGAK	6	716.406	6.48235	0.026455	10000	3.39241	0.007596	56.5402	0.1266
ArnB~P	202	208	VTEIGAK	6	716.406	6.24036	0.022938	0	0	0	0	0
ArnB~P	202	208	VTEIGAK	6	716.406	6.28873	0.042014	10	2.53753	0.024427	42.2921	0.407117
ArnB~P	202	208	VTEIGAK	6	716.406	6.22183	0.03828	30	2.71817	0.013716	45.3029	0.2286
ArnB~P	202	208	VTEIGAK	6	716.406	6.38741	0.019892	100	2.84745	0.008246	47.4575	0.137433
ArnB~P	202	208	VTEIGAK	6	716.406	6.21067	0.048026	1000	3.25397	0.012069	54.2328	0.20115
ArnB~P	202	208	VTEIGAK	6	716.406	6.38756	0.024394	10000	3.31017	0.011715	55.1695	0.19525
ArnA/ArnB~P	202	208	VTEIGAK	6	716.406	6.27768	0.013777	0	0	0	0	0
ArnA/ArnB~P	202	208	VTEIGAK	6	716.406	6.23534	0.025132	10	2.56338	0.015854	42.7231	0.264233
ArnA/ArnB~P	202	208	VTEIGAK	6	716.406	6.27343	0.012389	30	2.70195	0.016953	45.0325	0.28255
ArnA/ArnB~P	202	208	VTEIGAK	6	716.406	6.23026	0.004768	100	2.80778	0.008008	46.7964	0.133467
ArnA/ArnB~P	202	208	VTEIGAK	6	716.406	6.18766	0.010576	1000	3.22733	0.015317	53.7889	0.255283
ArnA/ArnB~P	202	208	VTEIGAK	6	716.406	6.39773	0.061767	10000	3.31591	0.019168	55.2652	0.319467
ArnB	202	211	VTEIGAKNVS	9	1016.55	6.96142	0.004887	0	0	0	0	0
ArnB	202	211	VTEIGAKNVS	9	1016.55	6.98812	0.02756	10	3.22288	0.063292	35.8098	0.703244
ArnB	202	211	VTEIGAKNVS	9	1016.55	7.04147	0.021106	30	3.44764	0.062336	38.3071	0.692622
ArnB	202	211	VTEIGAKNVS	9	1016.55	7.02761	0.011275	100	3.80217	0.034497	42.2463	0.3833
ArnB	202	211	VTEIGAKNVS	9	1016.55	7.04599	0.007346	1000	3.93498	0.020926	43.722	0.232511
ArnB	202	211	VTEIGAKNVS	9	1016.55	7.02117	0.018553	10000	3.91777	0.041539	43.5308	0.461544
ArnB~P	202	211	VTEIGAKNVS	9	1016.55	6.81958	0.019816	0	0	0	0	0
ArnB~P	202	211	VTEIGAKNVS	9	1016.55	6.88576	0.061271	10	3.8304	0.121187	42.56	1.34652
ArnB~P	202	211	VTEIGAKNVS	9	1016.55	6.87936	0.044929	30	3.92723	0.088696	43.6359	0.985511
ArnB~P	202	211	VTEIGAKNVS	9	1016.55	7.00586	0.022267	100	4.06887	0.018508	45.2097	0.205644
ArnB~P	202	211	VTEIGAKNVS	9	1016.55	6.90318	0.040534	1000	4.14228	0.044501	46.0254	0.494456
ArnB~P	202	211	VTEIGAKNVS	9	1016.55	6.96025	0.017204	10000	4.03203	0.057842	44.8003	0.642689
ArnA/ArnB~P	202	211	VTEIGAKNVS	9	1016.55	6.84088	0.008611	0	0	0	0	0
ArnA/ArnB~P	202	211	VTEIGAKNVS	9	1016.55	6.89739	0.02572	10	3.78669	0.047028	42.0744	0.522533
ArnA/ArnB~P	202	211	VTEIGAKNVS	9	1016.55	6.93923	0.016915	30	3.84949	0.109196	42.7721	1.21329
ArnA/ArnB~P	202	211	VTEIGAKNVS	9	1016.55	6.91769	0.019225	100	4.09268	0.088518	45.4742	0.983533
ArnA/ArnB~P	202	211	VTEIGAKNVS	9	1016.55	6.88802	0.007624	1000	4.03054	0.06148	44.7838	0.683111
ArnA/ArnB~P	202	211	VTEIGAKNVS	9	1016.55	6.98883	0.016924	10000	4.10463	0.045225	45.6069	0.5025
ArnB	205	213	IGAKNVSID	8	915.502	7.35422	0.011666	0	0	0	0	0
ArnB	205	213	IGAKNVSID	8	915.502	7.36296	0.013245	10	0.303479	0.042761	3.79349	0.534513
ArnB	205	213	IGAKNVSID	8	915.502	7.33787	0.019962	30	0.463548	0.012778	5.79435	0.159725
ArnB	205	213	IGAKNVSID	8	915.502	7.31901	0.018257	100	0.778069	0.010108	9.72586	0.12635
ArnB	205	213	IGAKNVSID	8	915.502	7.32536	0.018649	1000	1.65553	0.01296	20.6941	0.162
ArnB	205	213	IGAKNVSID	8	915.502	7.35614	0.014508	10000	2.24025	0.064977	28.0031	0.812212
ArnB~P	205	213	IGAKNVSID	8	915.502	7.39939	0.008236	0	0	0	0	0
ArnB~P	205	213	IGAKNVSID	8	915.502	7.40501	0.001785	10	1.28067	0.052929	16.0084	0.661612
ArnB~P	205	213	IGAKNVSID	8	915.502	7.40635	0.002451	30	1.37066	0.059041	17.1333	0.738013
ArnB~P	205	213	IGAKNVSID	8	915.502	7.39382	0.005866	100	1.64125	0.053067	20.5156	0.663338
ArnB~P	205	213	IGAKNVSID	8	915.502	7.38882	0.006171	1000	2.45951	0.054502	30.7439	0.681275
ArnB~P	205	213	IGAKNVSID	8	915.502	7.36886	0.005957	10000	3.04505	0.052802	38.0631	0.660025
ArnA/ArnB~P	205	213	IGAKNVSID	8	915.502	7.39838	0.006648	0	0	0	0	0
ArnA/ArnB~P	205	213	IGAKNVSID	8	915.502	7.39762	0.000885	10	1.32802	0.018789	16.6002	0.234863
ArnA/ArnB~P	205	213	IGAKNVSID	8	915.502	7.3946	0.003838	30	1.45281	0.019524	18.1602	0.24405
ArnA/ArnB~P	205	213	IGAKNVSID	8	915.502	7.38466	0.00458	100	1.67549	0.019875	20.9437	0.248438
ArnA/ArnB~P	205	213	IGAKNVSID	8	915.502	7.37314	0.007499	1000	2.51473	0.059055	31.4342	0.738187
ArnA/ArnB~P	205	213	IGAKNVSID	8	915.502	7.37138	0.005293	10000	3.21547	0.099245	40.1934	1.24056
ArnB	209	213	NVSID	4	546.264	7.55754	0.007314	0	0	0	0	0
ArnB	209	213	NVSID	4	546.264	7.57059	0.022513	10	0.027647	0.040361	0.691175	1.00903
ArnB	209	213	NVSID	4	546.264	7.59507	0.0215	30	0.000889	0.027061	0.022225	0.676525
ArnB	209	213	NVSID	4	546.264	7.58242	0.007643	100	0.010233	0.029146	0.255825	0.72865
ArnB	209	213	NVSID	4	546.264	7.59721	0.004231	1000	0.003277	0.017182	0.081925	0.42955
ArnB	209	213	NVSID	4	546.264	7.5815	0.016037	10000	0.066077	0.007943	1.65192	0.198575
ArnB~P	209	213	NVSID	4	546.264	7.44205	0.016307	0	0	0	0	0
ArnB~P	209	213	NVSID	4	546.264	7.50185	0.03916	10	0.05333	0.009011	1.33325	0.225275
ArnB~P	209	213	NVSID	4	546.264	7.51489	0.037101	30	0.064011	0.012127	1.60027	0.303175
ArnB~P	209	213	NVSID	4	546.264	7.60284	0.025229	100	0.058911	0.007618	1.47277	0.19045
ArnB~P	209	213	NVSID	4	546.264	7.54159	0.031347	1000	0.196301	0.010544	4.90752	0.2636
ArnB~P	209	213	NVSID	4	546.264	7.56559	0.007962	10000	0.508589	0.010843	12.7147	0.271075
ArnA/ArnB~P	209	213	NVSID	4	546.264	7.45834	0.011054	0	0	0	0	0
ArnA/ArnB~P	209	213	NVSID	4	546.264	7.52964	0.021964	10	0.070368	0.009887	1.7592	0.247175
ArnA/ArnB~P	209	213	NVSID	4	546.264	7.56965	0.009398	30	0.083959	0.010603	2.09898	0.265075
ArnA/ArnB~P	209	213	NVSID	4	546.264	7.56565	0.026259	100	0.100216	0.012471	2.5054	0.311775
ArnA/ArnB~P	209	213	NVSID	4	546.264	7.53754	0.006679	1000	0.246321	0.009911	6.15803	0.247775
ArnA/ArnB~P	209	213	NVSID	4	546.264	7.58099	0.01446	10000	0.611723	0.0158	15.2931	0.395
ArnB	214	218	IVSET	4	547.285	6.12336	0.026837	0	0	0	0	0
ArnB	214	218	IVSET	4	547.285	6.12581	0.018978	10	2.3006	0.047314	57.5151	1.18285
ArnB	214	218	IVSET	4	547.285	6.11045	0.028346	30	2.22395	0.021666	55.5987	0.54165
ArnB	214	218	IVSET	4	547.285	6.11331	0.010845	100	2.19236	0.02192	54.8091	0.548
ArnB	214	218	IVSET	4	547.285	6.11043	0.029265	1000	2.18253	0.016874	54.5632	0.42185
ArnB	214	218	IVSET	4	547.285	6.14657	0.006595	10000	2.15124	0.046181	53.781	1.15453
ArnB~P	214	218	IVSET	4	547.285	6.27806	0.019896	0	0	0	0	0
ArnB~P	214	218	IVSET	4	547.285	6.27036	0.005638	10	2.25739	0.015316	56.4348	0.3829
ArnB~P	214	218	IVSET	4	547.285	6.28636	0.002937	30	2.36607	0.018538	59.1517	0.46345
ArnB~P	214	218	IVSET	4	547.285	6.21551	0.026135	100	2.17454	0.016311	54.3634	0.407775
ArnB~P	214	218	IVSET	4	547.285	6.18679	0.015975	1000	2.25239	0.028655	56.3096	0.716375
ArnB~P	214	218	IVSET	4	547.285	6.10255	0.047925	10000	2.15786	0.00596	53.9465	0.149
ArnA/ArnB~P	214	218	IVSET	4	547.285	6.28893	0.007444	0	0	0	0	0
ArnA/ArnB~P	214	218	IVSET	4	547.285	6.27829	0.002722	10	2.24364	0.012191	56.0911	0.304775
ArnA/ArnB~P	214	218	IVSET	4	547.285	6.24467	0.009947	30	2.35699	0.018513	58.9248	0.462825
ArnA/ArnB~P	214	218	IVSET	4	547.285	6.20003	0.00379	100	2.15817	0.006123	53.9542	0.153075
ArnA/ArnB~P	214	218	IVSET	4	547.285	6.12857	0.015063	1000	2.17685	0.047825	54.4213	1.19562
ArnA/ArnB~P	214	218	IVSET	4	547.285	6.13087	0.018298	10000	2.19054	0.064524	54.7634	1.6131
ArnB	214	219	IVSETQ	5	675.343	5.95149	0.028449	0	0	0	0	0
ArnB	214	219	IVSETQ	5	675.343	5.9555	0.018588	10	2.96731	0.060138	59.3463	1.20276
ArnB	214	219	IVSETQ	5	675.343	5.94402	0.026973	30	2.89261	0.015485	57.8522	0.3097
ArnB	214	219	IVSETQ	5	675.343	5.95183	0.008208	100	2.82052	0.014889	56.4103	0.29778
ArnB	214	219	IVSETQ	5	675.343	5.94939	0.029236	1000	2.79616	0.007797	55.9233	0.15594
ArnB	214	219	IVSETQ	5	675.343	5.98357	0.007165	10000	2.79154	0.04689	55.8307	0.9378
ArnB~P	214	219	IVSETQ	5	675.343	6.12596	0.019863	0	0	0	0	0
ArnB~P	214	219	IVSETQ	5	675.343	6.11765	0.00703	10	2.89787	0.030402	57.9574	0.60804
ArnB~P	214	219	IVSETQ	5	675.343	6.13453	0.003347	30	3.02715	0.010426	60.543	0.20852
ArnB~P	214	219	IVSETQ	5	675.343	6.05499	0.030754	100	2.76614	0.00974	55.3227	0.1948
ArnB~P	214	219	IVSETQ	5	675.343	6.01672	0.021145	1000	2.87041	0.025507	57.4081	0.51014
ArnB~P	214	219	IVSETQ	5	675.343	5.90967	0.053924	10000	2.67631	0.015612	53.5262	0.31224
ArnA/ArnB~P	214	219	IVSETQ	5	675.343	6.13931	0.008567	0	0	0	0	0
ArnA/ArnB~P	214	219	IVSETQ	5	675.343	6.1278	0.003873	10	2.87703	0.008553	57.5405	0.17106
ArnA/ArnB~P	214	219	IVSETQ	5	675.343	6.0881	0.009786	30	3.04473	0.010899	60.8946	0.21798
ArnA/ArnB~P	214	219	IVSETQ	5	675.343	6.03711	0.002409	100	2.7618	0.008778	55.2359	0.17556
ArnA/ArnB~P	214	219	IVSETQ	5	675.343	5.94272	0.020168	1000	2.7345	0.05561	54.69	1.1122
ArnA/ArnB~P	214	219	IVSETQ	5	675.343	5.94611	0.019219	10000	2.80771	0.0981	56.1542	1.962
ArnB	214	221	IVSETQVK	7	902.507	6.53847	0.020156	0	0	0	0	0
ArnB	214	221	IVSETQVK	7	902.507	6.56775	0.024095	10	3.61391	0.048618	51.6273	0.694543
ArnB	214	221	IVSETQVK	7	902.507	6.60233	0.020328	30	3.63645	0.024805	51.9492	0.354357
ArnB	214	221	IVSETQVK	7	902.507	6.58966	0.010242	100	3.56757	0.011224	50.9652	0.160343
ArnB	214	221	IVSETQVK	7	902.507	6.60658	0.006655	1000	3.63096	0.008945	51.8708	0.127786
ArnB	214	221	IVSETQVK	7	902.507	6.58987	0.016512	10000	4.04343	0.021079	57.7634	0.301129
ArnB~P	214	221	IVSETQVK	7	902.507	6.34252	0.020898	0	0	0	0	0
ArnB~P	214	221	IVSETQVK	7	902.507	6.40824	0.066147	10	3.38512	0.026064	48.3589	0.372343
ArnB~P	214	221	IVSETQVK	7	902.507	6.36242	0.023476	30	3.49702	0.047266	49.9574	0.675229
ArnB~P	214	221	IVSETQVK	7	902.507	6.54454	0.020925	100	3.48058	0.008174	49.7225	0.116771
ArnB~P	214	221	IVSETQVK	7	902.507	6.37117	0.05078	1000	3.5904	0.008568	51.2914	0.1224
ArnB~P	214	221	IVSETQVK	7	902.507	6.53414	0.016439	10000	3.9989	0.006953	57.1272	0.0993286
ArnA/ArnB~P	214	221	IVSETQVK	7	902.507	6.37312	0.013002	0	0	0	0	0
ArnA/ArnB~P	214	221	IVSETQVK	7	902.507	6.37786	0.022172	10	3.46923	0.025859	49.5605	0.369414
ArnA/ArnB~P	214	221	IVSETQVK	7	902.507	6.42755	0.022725	30	3.5356	0.01864	50.5085	0.266286
ArnA/ArnB~P	214	221	IVSETQVK	7	902.507	6.37709	0.008545	100	3.4838	0.016029	49.7686	0.228986
ArnA/ArnB~P	214	221	IVSETQVK	7	902.507	6.34382	0.010087	1000	3.54364	0.015712	50.6235	0.224457
ArnA/ArnB~P	214	221	IVSETQVK	7	902.507	6.56501	0.020189	10000	3.89003	0.020394	55.5719	0.291343
ArnB	214	236	IVSETQVKLLNYPGPPVKLGAVE	19	2450.38	9.23655	0.005462	0	0	0	0	0
ArnB	214	236	IVSETQVKLLNYPGPPVKLGAVE	19	2450.38	9.25077	0.007802	10	8.8442	0.156744	46.5484	0.824968
ArnB	214	236	IVSETQVKLLNYPGPPVKLGAVE	19	2450.38	9.23703	0.005184	30	8.68064	0.035136	45.6876	0.184926
ArnB	214	236	IVSETQVKLLNYPGPPVKLGAVE	19	2450.38	9.22691	0.009872	100	8.96343	0.071681	47.1759	0.377268
ArnB	214	236	IVSETQVKLLNYPGPPVKLGAVE	19	2450.38	9.23822	0.003331	1000	10.6442	0.022172	56.022	0.116695
ArnB	214	236	IVSETQVKLLNYPGPPVKLGAVE	19	2450.38	9.23458	0.01383	10000	12.1911	0.294243	64.1639	1.54865
ArnB~P	214	236	IVSETQVKLLNYPGPPVKLGAVE	19	2450.38	9.28163	0.003014	0	0	0	0	0
ArnB~P	214	236	IVSETQVKLLNYPGPPVKLGAVE	19	2450.38	9.26935	0.001824	10	9.65487	0.10284	50.8151	0.541263
ArnB~P	214	236	IVSETQVKLLNYPGPPVKLGAVE	19	2450.38	9.27844	0.004603	30	10.6606	0.036053	56.1085	0.189753
ArnB~P	214	236	IVSETQVKLLNYPGPPVKLGAVE	19	2450.38	9.25721	0.004981	100	10.5108	0.031781	55.32	0.167268
ArnB~P	214	236	IVSETQVKLLNYPGPPVKLGAVE	19	2450.38	9.25944	0.007441	1000	12.3576	0.089394	65.0401	0.470495
ArnB~P	214	236	IVSETQVKLLNYPGPPVKLGAVE	19	2450.38	9.24036	0.003936	10000	12.4021	0.022081	65.2741	0.116216
ArnA/ArnB~P	214	236	IVSETQVKLLNYPGPPVKLGAVE	19	2450.38	9.27162	0.006772	0	0	0	0	0
ArnA/ArnB~P	214	236	IVSETQVKLLNYPGPPVKLGAVE	19	2450.38	9.25249	0.002199	10	9.60537	0.03807	50.5546	0.200368
ArnA/ArnB~P	214	236	IVSETQVKLLNYPGPPVKLGAVE	19	2450.38	9.26098	0.003743	30	10.8227	0.031326	56.9615	0.164874
ArnA/ArnB~P	214	236	IVSETQVKLLNYPGPPVKLGAVE	19	2450.38	9.2363	0.002697	100	10.471	0.053627	55.1104	0.282247
ArnA/ArnB~P	214	236	IVSETQVKLLNYPGPPVKLGAVE	19	2450.38	9.23805	0.013747	1000	11.768	0.349531	61.9366	1.83964
ArnA/ArnB~P	214	236	IVSETQVKLLNYPGPPVKLGAVE	19	2450.38	9.24386	0.010601	10000	12.6825	0.391172	66.7501	2.0588
ArnB	214	238	IVSETQVKLLNYPGPPVKLGAVESV	21	2636.48	9.4277	0.013712	0	0	0	0	0
ArnB	214	238	IVSETQVKLLNYPGPPVKLGAVESV	21	2636.48	9.4298	0.011014	10	10.4355	0.201997	49.6929	0.96189
ArnB	214	238	IVSETQVKLLNYPGPPVKLGAVESV	21	2636.48	9.42134	0.010896	30	10.2001	0.064281	48.5719	0.3061
ArnB	214	238	IVSETQVKLLNYPGPPVKLGAVESV	21	2636.48	9.40624	0.010386	100	10.518	0.027996	50.0856	0.133314
ArnB	214	238	IVSETQVKLLNYPGPPVKLGAVESV	21	2636.48	9.41011	0.00881	1000	12.1621	0.035129	57.9145	0.167281
ArnB	214	238	IVSETQVKLLNYPGPPVKLGAVESV	21	2636.48	9.41444	0.011665	10000	13.7055	0.320956	65.2642	1.52836
ArnB~P	214	238	IVSETQVKLLNYPGPPVKLGAVESV	21	2636.48	9.46664	0.009737	0	0	0	0	0
ArnB~P	214	238	IVSETQVKLLNYPGPPVKLGAVESV	21	2636.48	9.45644	0.004955	10	11.3559	0.128035	54.0756	0.60969
ArnB~P	214	238	IVSETQVKLLNYPGPPVKLGAVESV	21	2636.48	9.45357	0.004169	30	12.3334	0.066798	58.7303	0.318086
ArnB~P	214	238	IVSETQVKLLNYPGPPVKLGAVESV	21	2636.48	9.44476	0.00476	100	11.9697	0.024005	56.9986	0.11431
ArnB~P	214	238	IVSETQVKLLNYPGPPVKLGAVESV	21	2636.48	9.43435	0.005564	1000	14.0216	0.153466	66.7696	0.73079
ArnB~P	214	238	IVSETQVKLLNYPGPPVKLGAVESV	21	2636.48	9.42021	0.007529	10000	14.0037	0.089619	66.6842	0.426757
ArnA/ArnB~P	214	238	IVSETQVKLLNYPGPPVKLGAVESV	21	2636.48	9.43294	0.005742	0	0	0	0	0
ArnA/ArnB~P	214	238	IVSETQVKLLNYPGPPVKLGAVESV	21	2636.48	9.41631	0.000795	10	11.4345	0.027638	54.4501	0.13161
ArnA/ArnB~P	214	238	IVSETQVKLLNYPGPPVKLGAVESV	21	2636.48	9.42043	0.002913	30	12.5769	0.050042	59.89	0.238295
ArnA/ArnB~P	214	238	IVSETQVKLLNYPGPPVKLGAVESV	21	2636.48	9.39012	0.004429	100	11.9485	0.033408	56.8976	0.159086
ArnA/ArnB~P	214	238	IVSETQVKLLNYPGPPVKLGAVESV	21	2636.48	9.40009	0.019884	1000	13.521	0.490075	64.3858	2.33369
ArnA/ArnB~P	214	238	IVSETQVKLLNYPGPPVKLGAVESV	21	2636.48	9.4021	0.013729	10000	14.4945	0.369713	69.0213	1.76054
ArnB	216	221	SETQVK	5	690.354	6.54173	0.021716	0	0	0	0	0
ArnB	216	221	SETQVK	5	690.354	6.56636	0.025296	10	3.25246	0.046915	65.0491	0.9383
ArnB	216	221	SETQVK	5	690.354	6.60576	0.018863	30	3.24317	0.030959	64.8635	0.61918
ArnB	216	221	SETQVK	5	690.354	6.5909	0.010468	100	3.15134	0.021688	63.0268	0.43376
ArnB	216	221	SETQVK	5	690.354	6.60765	0.006374	1000	3.22424	0.002618	64.4849	0.05236
ArnB	216	221	SETQVK	5	690.354	6.5894	0.018272	10000	3.61904	0.035314	72.3808	0.70628
ArnB~P	216	221	SETQVK	5	690.354	6.34064	0.021803	0	0	0	0	0
ArnB~P	216	221	SETQVK	5	690.354	6.4162	0.067967	10	3.17981	0.013504	63.5962	0.27008
ArnB~P	216	221	SETQVK	5	690.354	6.36276	0.022966	30	3.20848	0.038531	64.1696	0.77062
ArnB~P	216	221	SETQVK	5	690.354	6.54592	0.021161	100	3.11335	0.01755	62.267	0.351
ArnB~P	216	221	SETQVK	5	690.354	6.37397	0.047266	1000	3.24574	0.010414	64.9149	0.20828
ArnB~P	216	221	SETQVK	5	690.354	6.53588	0.017322	10000	3.57561	0.057688	71.5123	1.15376
ArnA/ArnB~P	216	221	SETQVK	5	690.354	6.37374	0.012423	0	0	0	0	0
ArnA/ArnB~P	216	221	SETQVK	5	690.354	6.3823	0.0225	10	3.18637	0.007895	63.7274	0.1579
ArnA/ArnB~P	216	221	SETQVK	5	690.354	6.43252	0.024061	30	3.19459	0.012309	63.8917	0.24618
ArnA/ArnB~P	216	221	SETQVK	5	690.354	6.38291	0.00727	100	3.13328	0.007403	62.6657	0.14806
ArnA/ArnB~P	216	221	SETQVK	5	690.354	6.35061	0.010157	1000	3.19339	0.011741	63.8678	0.23482
ArnA/ArnB~P	216	221	SETQVK	5	690.354	6.56952	0.019635	10000	3.50514	0.015594	70.1028	0.31188
ArnB	220	237	VKLLNYPGPPVKLGAVES	14	1880.08	8.98348	0.00623	0	0	0	0	0
ArnB	220	237	VKLLNYPGPPVKLGAVES	14	1880.08	9.00042	0.013043	10	5.51964	0.050088	39.426	0.357771
ArnB	220	237	VKLLNYPGPPVKLGAVES	14	1880.08	9.02586	0.014147	30	5.7627	0.068103	41.1622	0.48645
ArnB	220	237	VKLLNYPGPPVKLGAVES	14	1880.08	9.02164	0.009377	100	6.1097	0.026755	43.6407	0.191107
ArnB	220	237	VKLLNYPGPPVKLGAVES	14	1880.08	9.03394	0.001141	1000	7.67706	0.00706	54.8362	0.0504286
ArnB	220	237	VKLLNYPGPPVKLGAVES	14	1880.08	9.01003	0.009879	10000	8.76165	0.018722	62.5832	0.133729
ArnB~P	220	237	VKLLNYPGPPVKLGAVES	14	1880.08	8.95517	0.013582	0	0	0	0	0
ArnB~P	220	237	VKLLNYPGPPVKLGAVES	14	1880.08	8.95544	0.024368	10	6.64116	0.036925	47.4369	0.26375
ArnB~P	220	237	VKLLNYPGPPVKLGAVES	14	1880.08	8.98066	0.026377	30	7.07348	0.052611	50.5249	0.375793
ArnB~P	220	237	VKLLNYPGPPVKLGAVES	14	1880.08	9.00024	0.005432	100	7.5481	0.02786	53.915	0.199
ArnB~P	220	237	VKLLNYPGPPVKLGAVES	14	1880.08	8.97895	0.049482	1000	8.71526	0.015644	62.2518	0.111743
ArnB~P	220	237	VKLLNYPGPPVKLGAVES	14	1880.08	9.00154	0.008911	10000	9.05121	0.034504	64.6515	0.246457
ArnA/ArnB~P	220	237	VKLLNYPGPPVKLGAVES	14	1880.08	8.94713	0.011188	0	0	0	0	0
ArnA/ArnB~P	220	237	VKLLNYPGPPVKLGAVES	14	1880.08	8.9746	0.004536	10	6.76256	0.024641	48.304	0.176007
ArnA/ArnB~P	220	237	VKLLNYPGPPVKLGAVES	14	1880.08	9.00522	0.003624	30	7.20923	0.052387	51.4945	0.374193
ArnA/ArnB~P	220	237	VKLLNYPGPPVKLGAVES	14	1880.08	8.97603	0.03606	100	7.6181	0.018795	54.415	0.13425
ArnA/ArnB~P	220	237	VKLLNYPGPPVKLGAVES	14	1880.08	9.00639	0.009698	1000	8.7526	0.013881	62.5186	0.09915
ArnA/ArnB~P	220	237	VKLLNYPGPPVKLGAVES	14	1880.08	8.99629	0.00693	10000	9.15978	0.013108	65.427	0.0936286
ArnB	220	238	VKLLNYPGPPVKLGAVESV	15	1979.14	9.2295	0.006783	0	0	0	0	0
ArnB	220	238	VKLLNYPGPPVKLGAVESV	15	1979.14	9.24497	0.005492	10	6.64693	0.100433	44.3129	0.669553
ArnB	220	238	VKLLNYPGPPVKLGAVESV	15	1979.14	9.23616	0.005205	30	6.59883	0.0341	43.9922	0.227333
ArnB	220	238	VKLLNYPGPPVKLGAVESV	15	1979.14	9.22576	0.010752	100	6.95419	0.010812	46.3612	0.07208
ArnB	220	238	VKLLNYPGPPVKLGAVESV	15	1979.14	9.23856	0.003889	1000	8.51181	0.025731	56.7454	0.17154
ArnB	220	238	VKLLNYPGPPVKLGAVESV	15	1979.14	9.23397	0.013544	10000	9.59101	0.234778	63.94	1.56519
ArnB~P	220	238	VKLLNYPGPPVKLGAVESV	15	1979.14	9.27591	0.003154	0	0	0	0	0
ArnB~P	220	238	VKLLNYPGPPVKLGAVESV	15	1979.14	9.261	0.002895	10	7.58211	0.057355	50.5474	0.382367
ArnB~P	220	238	VKLLNYPGPPVKLGAVESV	15	1979.14	9.26634	0.005329	30	8.35409	0.045711	55.6939	0.30474
ArnB~P	220	238	VKLLNYPGPPVKLGAVESV	15	1979.14	9.25131	0.004823	100	8.41137	0.034474	56.0758	0.229827
ArnB~P	220	238	VKLLNYPGPPVKLGAVESV	15	1979.14	9.25069	0.007495	1000	10.0558	0.074174	67.0387	0.494493
ArnB~P	220	238	VKLLNYPGPPVKLGAVESV	15	1979.14	9.23813	0.00406	10000	9.89052	0.038863	65.9368	0.259087
ArnA/ArnB~P	220	238	VKLLNYPGPPVKLGAVESV	15	1979.14	9.26384	0.005346	0	0	0	0	0
ArnA/ArnB~P	220	238	VKLLNYPGPPVKLGAVESV	15	1979.14	9.2424	0.002327	10	7.72492	0.046321	51.4994	0.308807
ArnA/ArnB~P	220	238	VKLLNYPGPPVKLGAVESV	15	1979.14	9.2481	0.003486	30	8.58238	0.029739	57.2158	0.19826
ArnA/ArnB~P	220	238	VKLLNYPGPPVKLGAVESV	15	1979.14	9.22598	0.002042	100	8.41632	0.024986	56.1088	0.166573
ArnA/ArnB~P	220	238	VKLLNYPGPPVKLGAVESV	15	1979.14	9.2327	0.014535	1000	9.7043	0.296271	64.6954	1.97514
ArnA/ArnB~P	220	238	VKLLNYPGPPVKLGAVESV	15	1979.14	9.23889	0.010909	10000	10.1896	0.281422	67.9306	1.87615
ArnB	223	234	LNYPGPPVKLGA	8	1224.69	8.73405	0.006649	0	0	0	0	0
ArnB	223	234	LNYPGPPVKLGA	8	1224.69	8.74653	0.006104	10	2.37576	0.019559	29.697	0.244487
ArnB	223	234	LNYPGPPVKLGA	8	1224.69	8.73247	0.005749	30	2.42483	0.015921	30.3104	0.199013
ArnB	223	234	LNYPGPPVKLGA	8	1224.69	8.73105	0.007665	100	2.75642	0.014762	34.4552	0.184525
ArnB	223	234	LNYPGPPVKLGA	8	1224.69	8.74527	0.000868	1000	3.65526	0.017176	45.6908	0.2147
ArnB	223	234	LNYPGPPVKLGA	8	1224.69	8.75128	0.013299	10000	4.0107	0.081647	50.1337	1.02059
ArnB~P	223	234	LNYPGPPVKLGA	8	1224.69	8.77324	0.006497	0	0	0	0	0
ArnB~P	223	234	LNYPGPPVKLGA	8	1224.69	8.76942	0.003538	10	2.96696	0.035727	37.087	0.446588
ArnB~P	223	234	LNYPGPPVKLGA	8	1224.69	8.77263	0.002332	30	3.25282	0.016715	40.6602	0.208937
ArnB~P	223	234	LNYPGPPVKLGA	8	1224.69	8.75464	0.007253	100	3.57267	0.022784	44.6584	0.2848
ArnB~P	223	234	LNYPGPPVKLGA	8	1224.69	8.74921	0.006277	1000	4.40958	0.015138	55.1197	0.189225
ArnB~P	223	234	LNYPGPPVKLGA	8	1224.69	8.73846	0.00479	10000	4.34409	0.031375	54.3012	0.392188
ArnA/ArnB~P	223	234	LNYPGPPVKLGA	8	1224.69	8.76333	0.006103	0	0	0	0	0
ArnA/ArnB~P	223	234	LNYPGPPVKLGA	8	1224.69	8.75183	0.001375	10	3.03756	0.013515	37.9695	0.168937
ArnA/ArnB~P	223	234	LNYPGPPVKLGA	8	1224.69	8.75565	0.003397	30	3.43824	0.016764	42.978	0.20955
ArnA/ArnB~P	223	234	LNYPGPPVKLGA	8	1224.69	8.73201	0.003427	100	3.64348	0.012872	45.5435	0.1609
ArnA/ArnB~P	223	234	LNYPGPPVKLGA	8	1224.69	8.73315	0.014668	1000	4.28439	0.100647	53.5549	1.25809
ArnA/ArnB~P	223	234	LNYPGPPVKLGA	8	1224.69	8.73551	0.011731	10000	4.48412	0.118981	56.0515	1.48726
ArnB	223	236	LNYPGPPVKLGAVE	10	1452.8	8.96879	0.007988	0	0	0	0	0
ArnB	223	236	LNYPGPPVKLGAVE	10	1452.8	8.9762	0.010735	10	3.23798	0.02826	32.3798	0.2826
ArnB	223	236	LNYPGPPVKLGAVE	10	1452.8	8.99582	0.011091	30	3.42941	0.021862	34.2941	0.21862
ArnB	223	236	LNYPGPPVKLGAVE	10	1452.8	8.98618	0.009111	100	3.75357	0.026023	37.5357	0.26023
ArnB	223	236	LNYPGPPVKLGAVE	10	1452.8	9.00152	0.003117	1000	5.06604	0.016058	50.6604	0.16058
ArnB	223	236	LNYPGPPVKLGAVE	10	1452.8	8.97582	0.009404	10000	5.66017	0.031813	56.6017	0.31813
ArnB~P	223	236	LNYPGPPVKLGAVE	10	1452.8	8.94378	0.01491	0	0	0	0	0
ArnB~P	223	236	LNYPGPPVKLGAVE	10	1452.8	8.94637	0.024458	10	4.19552	0.028476	41.9552	0.28476
ArnB~P	223	236	LNYPGPPVKLGAVE	10	1452.8	8.9694	0.029163	30	4.57479	0.026201	45.7479	0.26201
ArnB~P	223	236	LNYPGPPVKLGAVE	10	1452.8	8.98873	0.007388	100	4.95421	0.039723	49.5421	0.39723
ArnB~P	223	236	LNYPGPPVKLGAVE	10	1452.8	8.97011	0.04857	1000	5.77137	0.022497	57.7137	0.22497
ArnB~P	223	236	LNYPGPPVKLGAVE	10	1452.8	8.99032	0.009251	10000	5.8957	0.030755	58.957	0.30755
ArnA/ArnB~P	223	236	LNYPGPPVKLGAVE	10	1452.8	8.93087	0.008485	0	0	0	0	0
ArnA/ArnB~P	223	236	LNYPGPPVKLGAVE	10	1452.8	8.96113	0.005005	10	4.32506	0.07741	43.2506	0.7741
ArnA/ArnB~P	223	236	LNYPGPPVKLGAVE	10	1452.8	8.99485	0.002457	30	4.741	0.020936	47.41	0.20936
ArnA/ArnB~P	223	236	LNYPGPPVKLGAVE	10	1452.8	8.96894	0.036954	100	5.10099	0.067648	51.0099	0.67648
ArnA/ArnB~P	223	236	LNYPGPPVKLGAVE	10	1452.8	8.99506	0.008452	1000	5.79306	0.01063	57.9306	0.1063
ArnA/ArnB~P	223	236	LNYPGPPVKLGAVE	10	1452.8	8.98355	0.001609	10000	6.04447	0.04827	60.4447	0.4827
ArnB	223	237	LNYPGPPVKLGAVES	11	1539.83	8.8493	0.008434	0	0	0	0	0
ArnB	223	237	LNYPGPPVKLGAVES	11	1539.83	8.85541	0.009954	10	4.03054	0.042604	36.6413	0.387309
ArnB	223	237	LNYPGPPVKLGAVES	11	1539.83	8.87423	0.013173	30	4.18022	0.024086	38.002	0.218964
ArnB	223	237	LNYPGPPVKLGAVES	11	1539.83	8.86904	0.007036	100	4.56918	0.011374	41.538	0.1034
ArnB	223	237	LNYPGPPVKLGAVES	11	1539.83	8.88485	0.001551	1000	5.86461	0.021145	53.3147	0.192227
ArnB	223	237	LNYPGPPVKLGAVES	11	1539.83	8.86027	0.008876	10000	6.41605	0.019063	58.3277	0.1733
ArnB~P	223	237	LNYPGPPVKLGAVES	11	1539.83	8.82258	0.011951	0	0	0	0	0
ArnB~P	223	237	LNYPGPPVKLGAVES	11	1539.83	8.82506	0.02173	10	5.07649	0.029584	46.1499	0.268945
ArnB~P	223	237	LNYPGPPVKLGAVES	11	1539.83	8.84539	0.024377	30	5.43919	0.034998	49.4472	0.318164
ArnB~P	223	237	LNYPGPPVKLGAVES	11	1539.83	8.86855	0.005148	100	5.77274	0.045837	52.4795	0.4167
ArnB~P	223	237	LNYPGPPVKLGAVES	11	1539.83	8.84775	0.045741	1000	6.60505	0.022366	60.0459	0.203327
ArnB~P	223	237	LNYPGPPVKLGAVES	11	1539.83	8.86779	0.007412	10000	6.76297	0.014019	61.4815	0.127445
ArnA/ArnB~P	223	237	LNYPGPPVKLGAVES	11	1539.83	8.82176	0.009685	0	0	0	0	0
ArnA/ArnB~P	223	237	LNYPGPPVKLGAVES	11	1539.83	8.84591	0.001828	10	5.21473	0.025141	47.4066	0.228555
ArnA/ArnB~P	223	237	LNYPGPPVKLGAVES	11	1539.83	8.88007	0.00666	30	5.56847	0.02453	50.6225	0.223
ArnA/ArnB~P	223	237	LNYPGPPVKLGAVES	11	1539.83	8.8484	0.039736	100	5.83951	0.028032	53.0864	0.254836
ArnA/ArnB~P	223	237	LNYPGPPVKLGAVES	11	1539.83	8.87686	0.009182	1000	6.62096	0.019492	60.1906	0.1772
ArnA/ArnB~P	223	237	LNYPGPPVKLGAVES	11	1539.83	8.86785	0.005801	10000	6.8361	0.036304	62.1464	0.330036
ArnB	223	238	LNYPGPPVKLGAVESV	12	1638.9	9.192	0.010013	0	0	0	0	0
ArnB	223	238	LNYPGPPVKLGAVESV	12	1638.9	9.20936	0.004872	10	4.68416	0.058761	39.0347	0.489675
ArnB	223	238	LNYPGPPVKLGAVESV	12	1638.9	9.19612	0.003579	30	4.65913	0.021249	38.8261	0.177075
ArnB	223	238	LNYPGPPVKLGAVESV	12	1638.9	9.18533	0.0097	100	5.01464	0.019092	41.7886	0.1591
ArnB	223	238	LNYPGPPVKLGAVESV	12	1638.9	9.19391	0.004739	1000	6.30407	0.019378	52.5339	0.161483
ArnB	223	238	LNYPGPPVKLGAVESV	12	1638.9	9.19173	0.015187	10000	6.9397	0.172827	57.8309	1.44023
ArnB~P	223	238	LNYPGPPVKLGAVESV	12	1638.9	9.21725	0.013471	0	0	0	0	0
ArnB~P	223	238	LNYPGPPVKLGAVESV	12	1638.9	9.23003	0.002301	10	5.62403	0.048468	46.8669	0.4039
ArnB~P	223	238	LNYPGPPVKLGAVESV	12	1638.9	9.23265	0.00339	30	6.1291	0.030126	51.0758	0.25105
ArnB~P	223	238	LNYPGPPVKLGAVESV	12	1638.9	9.22217	0.005726	100	6.15832	0.033286	51.3194	0.277383
ArnB~P	223	238	LNYPGPPVKLGAVESV	12	1638.9	9.21036	0.009192	1000	7.38961	0.041154	61.5801	0.34295
ArnB~P	223	238	LNYPGPPVKLGAVESV	12	1638.9	9.20335	0.004878	10000	7.16823	0.048415	59.7353	0.403458
ArnA/ArnB~P	223	238	LNYPGPPVKLGAVESV	12	1638.9	9.22255	0.008776	0	0	0	0	0
ArnA/ArnB~P	223	238	LNYPGPPVKLGAVESV	12	1638.9	9.21503	0.003525	10	5.72225	0.016611	47.6854	0.138425
ArnA/ArnB~P	223	238	LNYPGPPVKLGAVESV	12	1638.9	9.2196	0.003918	30	6.38103	0.019712	53.1752	0.164267
ArnA/ArnB~P	223	238	LNYPGPPVKLGAVESV	12	1638.9	9.20223	0.003891	100	6.23775	0.022666	51.9812	0.188883
ArnA/ArnB~P	223	238	LNYPGPPVKLGAVESV	12	1638.9	9.19648	0.013863	1000	7.1218	0.202661	59.3483	1.68884
ArnA/ArnB~P	223	238	LNYPGPPVKLGAVESV	12	1638.9	9.20082	0.009947	10000	7.47997	0.239749	62.3331	1.99791
ArnB	237	244	SVVRVYGE	7	907.476	7.74143	0.00627	0	0	0	0	0
ArnB	237	244	SVVRVYGE	7	907.476	7.7573	0.005074	10	0.883364	0.043906	12.6195	0.627229
ArnB	237	244	SVVRVYGE	7	907.476	7.73674	0.007932	30	0.958018	0.013853	13.686	0.1979
ArnB	237	244	SVVRVYGE	7	907.476	7.7255	0.012077	100	0.935664	0.010105	13.3666	0.144357
ArnB	237	244	SVVRVYGE	7	907.476	7.73069	0.009044	1000	1.20663	0.01937	17.2375	0.276714
ArnB	237	244	SVVRVYGE	7	907.476	7.75537	0.01137	10000	1.75009	0.012781	25.0013	0.182586
ArnB~P	237	244	SVVRVYGE	7	907.476	7.78136	0.006163	0	0	0	0	0
ArnB~P	237	244	SVVRVYGE	7	907.476	7.78643	0.005698	10	1.10224	0.009675	15.7462	0.138214
ArnB~P	237	244	SVVRVYGE	7	907.476	7.80054	0.004681	30	1.06187	0.017657	15.1696	0.252243
ArnB~P	237	244	SVVRVYGE	7	907.476	7.77124	0.007111	100	1.3321	0.013952	19.03	0.199314
ArnB~P	237	244	SVVRVYGE	7	907.476	7.77335	0.006354	1000	1.65973	0.040735	23.7104	0.581929
ArnB~P	237	244	SVVRVYGE	7	907.476	7.74423	0.003472	10000	2.17513	0.010888	31.0732	0.155543
ArnA/ArnB~P	237	244	SVVRVYGE	7	907.476	7.77375	0.006384	0	0	0	0	0
ArnA/ArnB~P	237	244	SVVRVYGE	7	907.476	7.76794	0.001768	10	1.09678	0.019675	15.6683	0.281071
ArnA/ArnB~P	237	244	SVVRVYGE	7	907.476	7.78277	0.005058	30	1.11507	0.045057	15.9296	0.643671
ArnA/ArnB~P	237	244	SVVRVYGE	7	907.476	7.7512	0.003743	100	1.35892	0.029106	19.4131	0.4158
ArnA/ArnB~P	237	244	SVVRVYGE	7	907.476	7.74393	0.014048	1000	1.67743	0.021922	23.9632	0.313171
ArnA/ArnB~P	237	244	SVVRVYGE	7	907.476	7.74404	0.012804	10000	2.28519	0.043343	32.6456	0.619186
ArnB	238	244	VVRVYGE	6	820.444	7.59938	0.004866	0	0	0	0	0
ArnB	238	244	VVRVYGE	6	820.444	7.61983	0.026285	10	0.942789	0.012163	15.7132	0.202717
ArnB	238	244	VVRVYGE	6	820.444	7.6631	0.020717	30	0.94517	0.016501	15.7528	0.275017
ArnB	238	244	VVRVYGE	6	820.444	7.64804	0.008736	100	0.961234	0.017651	16.0206	0.294183
ArnB	238	244	VVRVYGE	6	820.444	7.66549	0.001367	1000	1.23696	0.012798	20.616	0.2133
ArnB	238	244	VVRVYGE	6	820.444	7.64218	0.014545	10000	1.72883	0.013291	28.8138	0.221517
ArnB~P	238	244	VVRVYGE	6	820.444	7.49763	0.013668	0	0	0	0	0
ArnB~P	238	244	VVRVYGE	6	820.444	7.55176	0.035913	10	1.02769	0.004806	17.1281	0.0801
ArnB~P	238	244	VVRVYGE	6	820.444	7.56854	0.032675	30	1.10174	0.013071	18.3624	0.21785
ArnB~P	238	244	VVRVYGE	6	820.444	7.63479	0.025121	100	1.26411	0.013359	21.0684	0.22265
ArnB~P	238	244	VVRVYGE	6	820.444	7.58649	0.026497	1000	1.58387	0.012876	26.3979	0.2146
ArnB~P	238	244	VVRVYGE	6	820.444	7.59919	0.006318	10000	1.79626	0.007824	29.9376	0.1304
ArnA/ArnB~P	238	244	VVRVYGE	6	820.444	7.49482	0.010686	0	0	0	0	0
ArnA/ArnB~P	238	244	VVRVYGE	6	820.444	7.56642	0.021017	10	1.03984	0.008425	17.3307	0.140417
ArnA/ArnB~P	238	244	VVRVYGE	6	820.444	7.60415	0.007319	30	1.11851	0.010316	18.6418	0.171933
ArnA/ArnB~P	238	244	VVRVYGE	6	820.444	7.59682	0.028722	100	1.31153	0.015424	21.8589	0.257067
ArnA/ArnB~P	238	244	VVRVYGE	6	820.444	7.57627	0.009209	1000	1.55607	0.0089	25.9345	0.148333
ArnA/ArnB~P	238	244	VVRVYGE	6	820.444	7.60384	0.014494	10000	1.80795	0.007529	30.1324	0.125483
ArnB	239	244	VRVYGE	5	721.375	7.20524	0.015473	0	0	0	0	0
ArnB	239	244	VRVYGE	5	721.375	7.20669	0.010983	10	0.101624	0.052731	2.03248	1.05462
ArnB	239	244	VRVYGE	5	721.375	7.1789	0.014848	30	0.178615	0.028746	3.5723	0.57492
ArnB	239	244	VRVYGE	5	721.375	7.16543	0.013874	100	0.178747	0.029916	3.57494	0.59832
ArnB	239	244	VRVYGE	5	721.375	7.16762	0.015846	1000	0.390309	0.027673	7.80618	0.55346
ArnB	239	244	VRVYGE	5	721.375	7.19135	0.010981	10000	0.820778	0.028287	16.4156	0.56574
ArnB~P	239	244	VRVYGE	5	721.375	7.27081	0.006606	0	0	0	0	0
ArnB~P	239	244	VRVYGE	5	721.375	7.27187	0.003808	10	0.210816	0.026637	4.21632	0.53274
ArnB~P	239	244	VRVYGE	5	721.375	7.27778	0.002606	30	0.140235	0.02177	2.8047	0.4354
ArnB~P	239	244	VRVYGE	5	721.375	7.25584	0.006777	100	0.419755	0.012151	8.3951	0.24302
ArnB~P	239	244	VRVYGE	5	721.375	7.25005	0.006519	1000	0.556481	0.050358	11.1296	1.00716
ArnB~P	239	244	VRVYGE	5	721.375	7.21842	0.008334	10000	0.835596	0.024514	16.7119	0.49028
ArnA/ArnB~P	239	244	VRVYGE	5	721.375	7.27049	0.005903	0	0	0	0	0
ArnA/ArnB~P	239	244	VRVYGE	5	721.375	7.25875	0.000753	10	0.281569	0.015341	5.63138	0.30682
ArnA/ArnB~P	239	244	VRVYGE	5	721.375	7.26191	0.004331	30	0.218705	0.041476	4.3741	0.82952
ArnA/ArnB~P	239	244	VRVYGE	5	721.375	7.2394	0.004966	100	0.486073	0.014643	9.72146	0.29286
ArnA/ArnB~P	239	244	VRVYGE	5	721.375	7.22895	0.01193	1000	0.59589	0.020971	11.9178	0.41942
ArnA/ArnB~P	239	244	VRVYGE	5	721.375	7.2215	0.0097	10000	0.845221	0.020544	16.9044	0.41088
ArnB	244	251	EIIIPPNF	5	941.522	10.1487	0.015753	0	0	0	0	0
ArnB	244	251	EIIIPPNF	5	941.522	10.1506	0.003677	10	0.138879	0.008789	2.77758	0.17578
ArnB	244	251	EIIIPPNF	5	941.522	10.1798	0.015183	30	0.199895	0.010718	3.9979	0.21436
ArnB	244	251	EIIIPPNF	5	941.522	10.1656	0.004049	100	0.460695	0.01721	9.2139	0.3442
ArnB	244	251	EIIIPPNF	5	941.522	10.1569	0.024998	1000	1.0501	0.012042	21.0019	0.24084
ArnB	244	251	EIIIPPNF	5	941.522	10.1608	0.007235	10000	2.15891	0.008807	43.1782	0.17614
ArnB~P	244	251	EIIIPPNF	5	941.522	10.1458	0.010435	0	0	0	0	0
ArnB~P	244	251	EIIIPPNF	5	941.522	10.1162	0.009809	10	0.128749	0.026824	2.57498	0.53648
ArnB~P	244	251	EIIIPPNF	5	941.522	10.1269	0.00979	30	0.214816	0.022346	4.29632	0.44692
ArnB~P	244	251	EIIIPPNF	5	941.522	10.1129	0.012901	100	0.480698	0.020662	9.61396	0.41324
ArnB~P	244	251	EIIIPPNF	5	941.522	10.1616	0.042731	1000	1.04742	0.015827	20.9484	0.31654
ArnB~P	244	251	EIIIPPNF	5	941.522	10.1904	0.024511	10000	2.18677	0.011299	43.7354	0.22598
ArnA/ArnB~P	244	251	EIIIPPNF	5	941.522	10.1014	0.013135	0	0	0	0	0
ArnA/ArnB~P	244	251	EIIIPPNF	5	941.522	10.1304	0.014868	10	0.11187	0.009616	2.2374	0.19232
ArnA/ArnB~P	244	251	EIIIPPNF	5	941.522	10.1439	0.024709	30	0.179727	0.012146	3.59454	0.24292
ArnA/ArnB~P	244	251	EIIIPPNF	5	941.522	10.1335	0.010416	100	0.301071	0.02937	6.02142	0.5874
ArnA/ArnB~P	244	251	EIIIPPNF	5	941.522	10.162	0.008052	1000	0.898516	0.01085	17.9703	0.217
ArnA/ArnB~P	244	251	EIIIPPNF	5	941.522	10.1556	0.02063	10000	1.86403	0.013807	37.2806	0.27614
ArnB	245	251	IIIPPNF	4	812.479	10.0052	0.015623	0	0	0	0	0
[truncated: 611 more rows]

## Sheet: ResidueHDX_ArnA
ArnA	Deuterium uptake (%)						ArnA/ArnB~P	Deuterium uptake (%)						ArnA/ArnB~P versus ArnA	Difference in deuterium uptake (%)
	HDX time (s)							HDX time (s)							HDX time (s)					Maximal diff.
Residue	10	30	100	1000	10000	Maximal	Residue	10	30	100	1000	10000	Maximal	Residue	10	30	100	1000	10000	Lowest	Highest
1							1							1
2							2							2
3							3							3
4							4							4
5	13	14.4	20.1	33.4	32.8	33.4	5	13.2	10.8	18.2	31.4	33.6	33.6	5	0.2	-3.6	-1.9	-2	0.8	-3.6	0.8
6	13	14.4	20.1	33.4	32.8	33.4	6	13.2	10.8	18.2	31.4	33.6	33.6	6	0.2	-3.6	-1.9	-2	0.8	-3.6	0.8
7	13	14.4	20.1	33.4	32.8	33.4	7	13.2	10.8	18.2	31.4	33.6	33.6	7	0.2	-3.6	-1.9	-2	0.8	-3.6	0.8
8	16.6	18.5	22.3	27.2	35.4	35.4	8	15.1	16.9	20.8	26.5	33.6	33.6	8	-1.5	-1.6	-1.5	-0.7	-1.8	-1.8	-0.7
9	16.6	18.5	22.3	27.2	35.4	35.4	9	15.1	16.9	20.8	26.5	33.6	33.6	9	-1.5	-1.6	-1.5	-0.7	-1.8	-1.8	-0.7
10	16.6	18.5	22.3	27.2	35.4	35.4	10	15.1	16.9	20.8	26.5	33.6	33.6	10	-1.5	-1.6	-1.5	-0.7	-1.8	-1.8	-0.7
11	16.6	18.5	22.3	27.2	35.4	35.4	11	15.1	16.9	20.8	26.5	33.6	33.6	11	-1.5	-1.6	-1.5	-0.7	-1.8	-1.8	-0.7
12	16.6	18.5	22.3	27.2	35.4	35.4	12	15.1	16.9	20.8	26.5	33.6	33.6	12	-1.5	-1.6	-1.5	-0.7	-1.8	-1.8	-0.7
13	23.2	24.8	27.5	31.3	37.4	37.4	13	21.7	23.3	25.5	29.9	35.5	35.5	13	-1.5	-1.5	-2	-1.4	-1.9	-2	-1.4
14	25.6	26.8	28.9	32.6	37.4	37.4	14	22.9	24.2	26.3	29.9	35	35	14	-2.7	-2.6	-2.6	-2.7	-2.4	-2.7	-2.4
15	31.5	34.1	36.6	39	42.2	42.2	15	26.9	28.5	32.5	35.4	39.5	39.5	15	-4.6	-5.6	-4.1	-3.6	-2.7	-5.6	-2.7
16	31.5	34.1	36.6	39	42.2	42.2	16	26.9	28.5	32.5	35.4	39.5	39.5	16	-4.6	-5.6	-4.1	-3.6	-2.7	-5.6	-2.7
17	31.5	34.1	36.6	39	42.2	42.2	17	26.9	28.5	32.5	35.4	39.5	39.5	17	-4.6	-5.6	-4.1	-3.6	-2.7	-5.6	-2.7
18							18							18
19	1.2	0.6	0	4.7	20.1	20.1	19	-0.2	-1	-0.9	0.6	9.7	9.7	19	-1.4	-1.6	-0.9	-4.1	-10.4	-10.4	-0.9
20	1.2	0.6	0	4.7	20.1	20.1	20	-0.2	-1	-0.9	0.6	9.7	9.7	20	-1.4	-1.6	-0.9	-4.1	-10.4	-10.4	-0.9
21	1.2	0.6	0	4.7	20.1	20.1	21	-0.2	-1	-0.9	0.6	9.7	9.7	21	-1.4	-1.6	-0.9	-4.1	-10.4	-10.4	-0.9
22	4.3	5.4	9.2	21	37.3	37.3	22	2.8	3	4.4	14.6	27.8	27.8	22	-1.5	-2.4	-4.8	-6.4	-9.5	-9.5	-1.5
23	4.3	5.4	9.2	21	37.3	37.3	23	2.8	3	4.4	14.6	27.8	27.8	23	-1.5	-2.4	-4.8	-6.4	-9.5	-9.5	-1.5
24	27.7	28.5	30.3	35.5	42	42	24	24.3	26.2	26.4	32.5	39	39	24	-3.4	-2.3	-3.9	-3	-3	-3.9	-2.3
25	27.7	28.5	30.3	35.5	42	42	25	24.3	26.2	26.4	32.5	39	39	25	-3.4	-2.3	-3.9	-3	-3	-3.9	-2.3
26	27.7	28.5	30.3	35.5	42	42	26	24.3	26.2	26.4	32.5	39	39	26	-3.4	-2.3	-3.9	-3	-3	-3.9	-2.3
27	27.7	28.5	30.3	35.5	42	42	27	24.3	26.2	26.4	32.5	39	39	27	-3.4	-2.3	-3.9	-3	-3	-3.9	-2.3
28	27.7	28.5	30.3	35.5	42	42	28	24.3	26.2	26.4	32.5	39	39	28	-3.4	-2.3	-3.9	-3	-3	-3.9	-2.3
29	27.7	28.5	30.3	35.5	42	42	29	24.3	26.2	26.4	32.5	39	39	29	-3.4	-2.3	-3.9	-3	-3	-3.9	-2.3
30	67.7	67.7	66	65.8	64.7	67.7	30	66.1	67	65.4	65.7	64.9	67	30	-1.6	-0.7	-0.6	-0.1	0.2	-1.6	0.2
31	69	67.6	65.8	66.1	65.4	69	31	66.1	70.6	65.4	66.4	67.3	70.6	31	-2.9	3	-0.4	0.3	1.9	-2.9	3
32	41.8	41.7	40.3	40.3	39.3	41.8	32	42.9	42.8	41.6	41.4	40.6	42.9	32	1.1	1.1	1.3	1.1	1.3	1.1	1.3
33	41.8	41.7	40.3	40.3	39.3	41.8	33	42.9	42.8	41.6	41.4	40.6	42.9	33	1.1	1.1	1.3	1.1	1.3	1.1	1.3
34	41.8	41.7	40.3	40.3	39.3	41.8	34	42.9	42.8	41.6	41.4	40.6	42.9	34	1.1	1.1	1.3	1.1	1.3	1.1	1.3
35	69	67.6	65.8	66.1	65.4	69	35	66.1	70.6	65.4	66.4	67.3	70.6	35	-2.9	3	-0.4	0.3	1.9	-2.9	3
36	69	67.6	65.8	66.1	65.4	69	36	66.1	70.6	65.4	66.4	67.3	70.6	36	-2.9	3	-0.4	0.3	1.9	-2.9	3
37	69	67.6	65.8	66.1	65.4	69	37	66.1	70.6	65.4	66.4	67.3	70.6	37	-2.9	3	-0.4	0.3	1.9	-2.9	3
38	69	67.6	65.8	66.1	65.4	69	38	66.1	70.6	65.4	66.4	67.3	70.6	38	-2.9	3	-0.4	0.3	1.9	-2.9	3
39	69	67.6	65.8	66.1	65.4	69	39	66.1	70.6	65.4	66.4	67.3	70.6	39	-2.9	3	-0.4	0.3	1.9	-2.9	3
40	69	67.6	65.8	66.1	65.4	69	40	66.1	70.6	65.4	66.4	67.3	70.6	40	-2.9	3	-0.4	0.3	1.9	-2.9	3
41	69	67.6	65.8	66.1	65.4	69	41	66.1	70.6	65.4	66.4	67.3	70.6	41	-2.9	3	-0.4	0.3	1.9	-2.9	3
42	69	67.6	65.8	66.1	65.4	69	42	66.1	70.6	65.4	66.4	67.3	70.6	42	-2.9	3	-0.4	0.3	1.9	-2.9	3
43	69	67.6	65.8	66.1	65.4	69	43	66.1	70.6	65.4	66.4	67.3	70.6	43	-2.9	3	-0.4	0.3	1.9	-2.9	3
44	69	67.6	65.8	66.1	65.4	69	44	66.1	70.6	65.4	66.4	67.3	70.6	44	-2.9	3	-0.4	0.3	1.9	-2.9	3
45	69	67.6	65.8	66.1	65.4	69	45	66.1	70.6	65.4	66.4	67.3	70.6	45	-2.9	3	-0.4	0.3	1.9	-2.9	3
46	69	67.6	65.8	66.1	65.4	69	46	66.1	70.6	65.4	66.4	67.3	70.6	46	-2.9	3	-0.4	0.3	1.9	-2.9	3
47	69	67.6	65.8	66.1	65.4	69	47	66.1	70.6	65.4	66.4	67.3	70.6	47	-2.9	3	-0.4	0.3	1.9	-2.9	3
48	69	67.6	65.8	66.1	65.4	69	48	66.1	70.6	65.4	66.4	67.3	70.6	48	-2.9	3	-0.4	0.3	1.9	-2.9	3
49	69	67.6	65.8	66.1	65.4	69	49	66.1	70.6	65.4	66.4	67.3	70.6	49	-2.9	3	-0.4	0.3	1.9	-2.9	3
50	69	67.6	65.8	66.1	65.4	69	50	66.1	70.6	65.4	66.4	67.3	70.6	50	-2.9	3	-0.4	0.3	1.9	-2.9	3
51	64.3	63.7	62.4	62.1	60.9	64.3	51	64.2	64.1	62.8	63	62.1	64.2	51	-0.1	0.4	0.4	0.9	1.2	-0.1	1.2
52	64.5	64	60.9	60.9	61.6	64.5	52	63.2	66.1	61	61.6	61.9	66.1	52	-1.3	2.1	0.1	0.7	0.3	-1.3	2.1
53	44.6	44.7	43.6	43.4	42.2	44.7	53	44.7	44.4	43.8	43.7	43.2	44.7	53	0.1	-0.3	0.2	0.3	1	-0.3	1
54	44.6	44.7	43.6	43.4	42.2	44.7	54	44.7	44.4	43.8	43.7	43.2	44.7	54	0.1	-0.3	0.2	0.3	1	-0.3	1
55	44.6	44.7	43.6	43.4	42.2	44.7	55	44.7	44.4	43.8	43.7	43.2	44.7	55	0.1	-0.3	0.2	0.3	1	-0.3	1
56	44.6	44.7	43.6	43.4	42.2	44.7	56	44.7	44.4	43.8	43.7	43.2	44.7	56	0.1	-0.3	0.2	0.3	1	-0.3	1
57	44.6	44.7	43.6	43.4	42.2	44.7	57	44.7	44.4	43.8	43.7	43.2	44.7	57	0.1	-0.3	0.2	0.3	1	-0.3	1
58	60.6	60.8	59.1	59.1	58.1	60.8	58	59.1	59.3	58.6	59.3	56.9	59.3	58	-1.5	-1.5	-0.5	0.2	-1.2	-1.5	0.2
59	60.6	60.8	59.1	59.1	58.1	60.8	59	59.1	59.3	58.6	59.3	56.9	59.3	59	-1.5	-1.5	-0.5	0.2	-1.2	-1.5	0.2
60	60.5	61	59.5	59.5	57.8	61	60	59.5	59.8	58.5	58.4	57.4	59.8	60	-1	-1.2	-1	-1.1	-0.4	-1.2	-0.4
61	64.3	63.7	62.4	62.1	60.9	64.3	61	64.2	64.1	62.8	63	62.1	64.2	61	-0.1	0.4	0.4	0.9	1.2	-0.1	1.2
62							62							62
63	65	64.8	63.7	63	62	65	63	64.2	64.4	62.8	63.2	62.5	64.4	63	-0.8	-0.4	-0.9	0.2	0.5	-0.9	0.5
64	65	64.8	63.7	63	62	65	64	64.2	64.4	62.8	63.2	62.5	64.4	64	-0.8	-0.4	-0.9	0.2	0.5	-0.9	0.5
65	65	64.8	63.7	63	62	65	65	64.2	64.4	62.8	63.2	62.5	64.4	65	-0.8	-0.4	-0.9	0.2	0.5	-0.9	0.5
66	65	64.8	63.7	63	62	65	66	64.2	64.4	62.8	63.2	62.5	64.4	66	-0.8	-0.4	-0.9	0.2	0.5	-0.9	0.5
67	65	64.8	63.7	63	62	65	67	64.2	64.4	62.8	63.2	62.5	64.4	67	-0.8	-0.4	-0.9	0.2	0.5	-0.9	0.5
68	65	64.8	63.7	63	62	65	68	64.2	64.4	62.8	63.2	62.5	64.4	68	-0.8	-0.4	-0.9	0.2	0.5	-0.9	0.5
69							69							69
70							70							70
71							71							71
72							72							72
73							73							73
74	52.7	53.2	51.2	49.6	48.9	53.2	74	51.7	51	51.2	50.9	50	51.7	74	-1	-2.2	0	1.3	1.1	-2.2	1.3
75	52.7	53.2	51.2	49.6	48.9	53.2	75	51.7	51	51.2	50.9	50	51.7	75	-1	-2.2	0	1.3	1.1	-2.2	1.3
76	52.7	53.2	51.2	49.6	48.9	53.2	76	51.7	51	51.2	50.9	50	51.7	76	-1	-2.2	0	1.3	1.1	-2.2	1.3
77	52.7	53.2	51.2	49.6	48.9	53.2	77	51.7	51	51.2	50.9	50	51.7	77	-1	-2.2	0	1.3	1.1	-2.2	1.3
78							78							78
79	67.6	67.7	67.4	70.1	69.5	70.1	79	67.3	67.6	67.2	70.5	69.7	70.5	79	-0.3	-0.1	-0.2	0.4	0.2	-0.3	0.4
80	67.6	67.7	67.4	70.1	69.5	70.1	80	67.3	67.6	67.2	70.5	69.7	70.5	80	-0.3	-0.1	-0.2	0.4	0.2	-0.3	0.4
81	67.6	67.7	67.4	70.1	69.5	70.1	81	67.3	67.6	67.2	70.5	69.7	70.5	81	-0.3	-0.1	-0.2	0.4	0.2	-0.3	0.4
82	67.7	67.8	67	70.6	69.9	70.6	82	67.4	67.9	67.8	70.5	70.3	70.5	82	-0.3	0.1	0.8	-0.1	0.4	-0.3	0.8
83	67.7	67.8	67	70.6	69.9	70.6	83	67.4	67.9	67.8	70.5	70.3	70.5	83	-0.3	0.1	0.8	-0.1	0.4	-0.3	0.8
84	67.7	67.8	67	70.6	69.9	70.6	84	67.4	67.9	67.8	70.5	70.3	70.5	84	-0.3	0.1	0.8	-0.1	0.4	-0.3	0.8
85	67.7	67.8	67	70.6	69.9	70.6	85	67.4	67.9	67.8	70.5	70.3	70.5	85	-0.3	0.1	0.8	-0.1	0.4	-0.3	0.8
86	67.7	67.8	67	70.6	69.9	70.6	86	67.4	67.9	67.8	70.5	70.3	70.5	86	-0.3	0.1	0.8	-0.1	0.4	-0.3	0.8
87	67.7	67.8	67	70.6	69.9	70.6	87	67.4	67.9	67.8	70.5	70.3	70.5	87	-0.3	0.1	0.8	-0.1	0.4	-0.3	0.8
88	67.7	67.8	67	70.6	69.9	70.6	88	67.4	67.9	67.8	70.5	70.3	70.5	88	-0.3	0.1	0.8	-0.1	0.4	-0.3	0.8
89	67.7	67.8	67	70.6	69.9	70.6	89	67.4	67.9	67.8	70.5	70.3	70.5	89	-0.3	0.1	0.8	-0.1	0.4	-0.3	0.8
90	67.7	67.8	67	70.6	69.9	70.6	90	67.4	67.9	67.8	70.5	70.3	70.5	90	-0.3	0.1	0.8	-0.1	0.4	-0.3	0.8
91	67.7	67.8	67	70.6	69.9	70.6	91	67.4	67.9	67.8	70.5	70.3	70.5	91	-0.3	0.1	0.8	-0.1	0.4	-0.3	0.8
92	67.7	67.8	67	70.6	69.9	70.6	92	67.4	67.9	67.8	70.5	70.3	70.5	92	-0.3	0.1	0.8	-0.1	0.4	-0.3	0.8
93	67.7	67.8	67	70.6	69.9	70.6	93	67.4	67.9	67.8	70.5	70.3	70.5	93	-0.3	0.1	0.8	-0.1	0.4	-0.3	0.8
94	67.7	67.8	67	70.6	69.9	70.6	94	67.4	67.9	67.8	70.5	70.3	70.5	94	-0.3	0.1	0.8	-0.1	0.4	-0.3	0.8
95	67.7	67.8	67	70.6	69.9	70.6	95	67.4	67.9	67.8	70.5	70.3	70.5	95	-0.3	0.1	0.8	-0.1	0.4	-0.3	0.8
96	67.7	67.8	67	70.6	69.9	70.6	96	67.4	67.9	67.8	70.5	70.3	70.5	96	-0.3	0.1	0.8	-0.1	0.4	-0.3	0.8
97	67.7	67.8	67	70.6	69.9	70.6	97	67.4	67.9	67.8	70.5	70.3	70.5	97	-0.3	0.1	0.8	-0.1	0.4	-0.3	0.8
98	67.7	67.8	67	70.6	69.9	70.6	98	67.4	67.9	67.8	70.5	70.3	70.5	98	-0.3	0.1	0.8	-0.1	0.4	-0.3	0.8
99	67.7	67.8	67	70.6	69.9	70.6	99	67.4	67.9	67.8	70.5	70.3	70.5	99	-0.3	0.1	0.8	-0.1	0.4	-0.3	0.8
100	67.7	67.8	67	70.6	69.9	70.6	100	67.4	67.9	67.8	70.5	70.3	70.5	100	-0.3	0.1	0.8	-0.1	0.4	-0.3	0.8
101	67.7	67.8	67	70.6	69.9	70.6	101	67.4	67.9	67.8	70.5	70.3	70.5	101	-0.3	0.1	0.8	-0.1	0.4	-0.3	0.8
102							102							102
103							103							103
104							104							104
105							105							105
106	22.9	24.9	26.5	41.6	47.7	47.7	106	22.9	25.2	27.6	42.4	46.8	46.8	106	0	0.3	1.1	0.8	-0.9	-0.9	1.1
107	22.9	24.9	26.5	41.6	47.7	47.7	107	22.9	25.2	27.6	42.4	46.8	46.8	107	0	0.3	1.1	0.8	-0.9	-0.9	1.1
108	22.9	24.9	26.5	41.6	47.7	47.7	108	22.9	25.2	27.6	42.4	46.8	46.8	108	0	0.3	1.1	0.8	-0.9	-0.9	1.1
109	22.9	24.9	26.5	41.6	47.7	47.7	109	22.9	25.2	27.6	42.4	46.8	46.8	109	0	0.3	1.1	0.8	-0.9	-0.9	1.1
110	46.8	47.7	47.5	54.8	57.1	57.1	110	46	46.9	47.6	55.3	57.1	57.1	110	-0.8	-0.8	0.1	0.5	0	-0.8	0.5
111	46.8	47.7	47.5	54.8	57.1	57.1	111	46	46.9	47.6	55.3	57.1	57.1	111	-0.8	-0.8	0.1	0.5	0	-0.8	0.5
112	46.8	47.7	47.5	54.8	57.1	57.1	112	46	46.9	47.6	55.3	57.1	57.1	112	-0.8	-0.8	0.1	0.5	0	-0.8	0.5
113	59	59.5	58.7	62.1	64.1	64.1	113	58.1	58.4	58	62	65.2	65.2	113	-0.9	-1.1	-0.7	-0.1	1.1	-1.1	1.1
114	59	59.5	58.7	62.1	64.1	64.1	114	58.1	58.4	58	62	65.2	65.2	114	-0.9	-1.1	-0.7	-0.1	1.1	-1.1	1.1
115	59	59.5	58.7	62.1	64.1	64.1	115	58.1	58.4	58	62	65.2	65.2	115	-0.9	-1.1	-0.7	-0.1	1.1	-1.1	1.1
116	59	59.5	58.7	62.1	64.1	64.1	116	58.1	58.4	58	62	65.2	65.2	116	-0.9	-1.1	-0.7	-0.1	1.1	-1.1	1.1
117	59	59.5	58.7	62.1	64.1	64.1	117	58.1	58.4	58	62	65.2	65.2	117	-0.9	-1.1	-0.7	-0.1	1.1	-1.1	1.1
118	59	59.5	58.7	62.1	64.1	64.1	118	58.1	58.4	58	62	65.2	65.2	118	-0.9	-1.1	-0.7	-0.1	1.1	-1.1	1.1
119	59	59.5	58.7	62.1	64.1	64.1	119	58.1	58.4	58	62	65.2	65.2	119	-0.9	-1.1	-0.7	-0.1	1.1	-1.1	1.1
120	57.8	57.3	55.4	56.3	57.4	57.8	120	56.7	59.7	55.6	57.2	61.3	61.3	120	-1.1	2.4	0.2	0.9	3.9	-1.1	3.9
121	40.1	40.4	39.2	39	38.2	40.4	121	36	36	36	37.3	37.8	37.8	121	-4.1	-4.4	-3.2	-1.7	-0.4	-4.4	-0.4
122	40.1	40.4	39.2	39	38.2	40.4	122	36	36	36	37.3	37.8	37.8	122	-4.1	-4.4	-3.2	-1.7	-0.4	-4.4	-0.4
123	40.1	40.4	39.2	39	38.2	40.4	123	36	36	36	37.3	37.8	37.8	123	-4.1	-4.4	-3.2	-1.7	-0.4	-4.4	-0.4
124	46.4	50.2	49.9	50.3	49.3	50.3	124	33.9	44.3	47.2	50.7	50.8	50.8	124	-12.5	-5.9	-2.7	0.4	1.5	-12.5	1.5
125	46.4	50.2	49.9	50.3	49.3	50.3	125	33.9	44.3	47.2	50.7	50.8	50.8	125	-12.5	-5.9	-2.7	0.4	1.5	-12.5	1.5
126	28.8	35.1	36.7	36.2	35.8	36.7	126	15.7	23.2	32.9	37.4	37.2	37.4	126	-13.1	-11.9	-3.8	1.2	1.4	-13.1	1.4
127	23.2	28.8	31.7	54.9	76.7	76.7	127	15.2	22	27.8	39.3	54.9	54.9	127	-8	-6.8	-3.9	-15.6	-21.8	-21.8	-3.9
128	23.2	28.8	31.7	54.9	76.7	76.7	128	15.2	22	27.8	39.3	54.9	54.9	128	-8	-6.8	-3.9	-15.6	-21.8	-21.8	-3.9
129	23.2	28.8	31.7	54.9	76.7	76.7	129	15.2	22	27.8	39.3	54.9	54.9	129	-8	-6.8	-3.9	-15.6	-21.8	-21.8	-3.9
130	23.2	28.8	31.7	54.9	76.7	76.7	130	15.2	22	27.8	39.3	54.9	54.9	130	-8	-6.8	-3.9	-15.6	-21.8	-21.8	-3.9
131	18.6	20.2	22.1	41.6	56.4	56.4	131	16.7	19.1	19.6	23.7	36	36	131	-1.9	-1.1	-2.5	-17.9	-20.4	-20.4	-1.1
132	18.6	20.2	22.1	41.6	56.4	56.4	132	16.7	19.1	19.6	23.7	36	36	132	-1.9	-1.1	-2.5	-17.9	-20.4	-20.4	-1.1
133	18.6	20.2	22.1	41.6	56.4	56.4	133	16.7	19.1	19.6	23.7	36	36	133	-1.9	-1.1	-2.5	-17.9	-20.4	-20.4	-1.1
134	18.6	20.2	22.1	41.6	56.4	56.4	134	16.7	19.1	19.6	23.7	36	36	134	-1.9	-1.1	-2.5	-17.9	-20.4	-20.4	-1.1
135	18.6	20.2	22.1	41.6	56.4	56.4	135	16.7	19.1	19.6	23.7	36	36	135	-1.9	-1.1	-2.5	-17.9	-20.4	-20.4	-1.1
136	18.6	20.2	22.1	41.6	56.4	56.4	136	16.7	19.1	19.6	23.7	36	36	136	-1.9	-1.1	-2.5	-17.9	-20.4	-20.4	-1.1
137							137							137
138	10.4	16.3	26.7	35.9	41.9	41.9	138	4.6	8	18.3	34.5	34.6	34.6	138	-5.8	-8.3	-8.4	-1.4	-7.3	-8.4	-1.4
139	10.4	16.3	26.7	35.9	41.9	41.9	139	4.6	8	18.3	34.5	34.6	34.6	139	-5.8	-8.3	-8.4	-1.4	-7.3	-8.4	-1.4
140	10.4	16.3	26.7	35.9	41.9	41.9	140	4.6	8	18.3	34.5	34.6	34.6	140	-5.8	-8.3	-8.4	-1.4	-7.3	-8.4	-1.4
141	10.4	16.3	26.7	35.9	41.9	41.9	141	4.6	8	18.3	34.5	34.6	34.6	141	-5.8	-8.3	-8.4	-1.4	-7.3	-8.4	-1.4
142	10.4	16.3	26.7	35.9	41.9	41.9	142	4.6	8	18.3	34.5	34.6	34.6	142	-5.8	-8.3	-8.4	-1.4	-7.3	-8.4	-1.4
143	27.4	32.5	38.4	43.9	48.1	48.1	143	16.7	21.7	32	43.6	43.3	43.6	143	-10.7	-10.8	-6.4	-0.3	-4.8	-10.8	-0.3
144	27.4	32.5	38.4	43.9	48.1	48.1	144	16.7	21.7	32	43.6	43.3	43.6	144	-10.7	-10.8	-6.4	-0.3	-4.8	-10.8	-0.3
145	27.7	32.3	37.5	49.3	53.2	53.2	145	17.9	24.9	31.1	41.5	48.7	48.7	145	-9.8	-7.4	-6.4	-7.8	-4.5	-9.8	-4.5
146	23.8	25.8	28.9	37.1	38	38	146	15.6	20.2	21.4	27.1	36.2	36.2	146	-8.2	-5.6	-7.5	-10	-1.8	-10	-1.8
147	23.8	25.8	28.9	37.1	38	38	147	15.6	20.2	21.4	27.1	36.2	36.2	147	-8.2	-5.6	-7.5	-10	-1.8	-10	-1.8
148	23.8	25.8	28.9	37.1	38	38	148	15.6	20.2	21.4	27.1	36.2	36.2	148	-8.2	-5.6	-7.5	-10	-1.8	-10	-1.8
149	23.8	25.8	28.9	37.1	38	38	149	15.6	20.2	21.4	27.1	36.2	36.2	149	-8.2	-5.6	-7.5	-10	-1.8	-10	-1.8
150	23.8	25.8	28.9	37.1	38	38	150	15.6	20.2	21.4	27.1	36.2	36.2	150	-8.2	-5.6	-7.5	-10	-1.8	-10	-1.8
151	23.8	25.8	28.9	37.1	38	38	151	15.6	20.2	21.4	27.1	36.2	36.2	151	-8.2	-5.6	-7.5	-10	-1.8	-10	-1.8
152	23.8	25.8	28.9	37.1	38	38	152	15.6	20.2	21.4	27.1	36.2	36.2	152	-8.2	-5.6	-7.5	-10	-1.8	-10	-1.8
153	23.8	25.8	28.9	37.1	38	38	153	15.6	20.2	21.4	27.1	36.2	36.2	153	-8.2	-5.6	-7.5	-10	-1.8	-10	-1.8
154	21	23.1	27.2	36.2	39.7	39.7	154	14.3	18.3	20.8	26.9	36.7	36.7	154	-6.7	-4.8	-6.4	-9.3	-3	-9.3	-3
155	44.4	48	48.1	47.7	47.2	48.1	155	43.1	46.1	46.8	47	46.7	47	155	-1.3	-1.9	-1.3	-0.7	-0.5	-1.9	-0.5
156	44.4	48	48.1	47.7	47.2	48.1	156	43.1	46.1	46.8	47	46.7	47	156	-1.3	-1.9	-1.3	-0.7	-0.5	-1.9	-0.5
157	44.4	48	48.1	47.7	47.2	48.1	157	43.1	46.1	46.8	47	46.7	47	157	-1.3	-1.9	-1.3	-0.7	-0.5	-1.9	-0.5
158	21.4	22.8	22.5	22.2	21.8	22.8	158	22.6	23.4	22.9	23.1	22.8	23.4	158	1.2	0.6	0.4	0.9	1	0.4	1.2
159	21.4	22.8	22.5	22.2	21.8	22.8	159	22.6	23.4	22.9	23.1	22.8	23.4	159	1.2	0.6	0.4	0.9	1	0.4	1.2
160	21.4	22.8	22.5	22.2	21.8	22.8	160	22.6	23.4	22.9	23.1	22.8	23.4	160	1.2	0.6	0.4	0.9	1	0.4	1.2
161	1.3	1.9	4.7	17.2	17.2	17.2	161	2.4	2.9	5.2	16.5	16.9	16.9	161	1.1	1	0.5	-0.7	-0.3	-0.7	1.1
162	1.3	1.9	4.7	17.2	17.2	17.2	162	2.4	2.9	5.2	16.5	16.9	16.9	162	1.1	1	0.5	-0.7	-0.3	-0.7	1.1
163	1.3	1.9	4.7	17.2	17.2	17.2	163	2.4	2.9	5.2	16.5	16.9	16.9	163	1.1	1	0.5	-0.7	-0.3	-0.7	1.1
164	3.1	5.2	12.3	27.8	27.6	27.8	164	3.8	6.1	12.9	28	28.2	28.2	164	0.7	0.9	0.6	0.2	0.6	0.2	0.9
165	25.1	28	33.1	40.5	42.3	42.3	165	12.8	18.1	25	34.4	42.6	42.6	165	-12.3	-9.9	-8.1	-6.1	0.3	-12.3	0.3
166	26.2	30.1	36.9	39.3	39.3	39.3	166	15.3	21.7	28	35.2	40.8	40.8	166	-10.9	-8.4	-8.9	-4.1	1.5	-10.9	1.5
167	26.2	30.1	36.9	39.3	39.3	39.3	167	15.3	21.7	28	35.2	40.8	40.8	167	-10.9	-8.4	-8.9	-4.1	1.5	-10.9	1.5
168	26.2	30.1	36.9	39.3	39.3	39.3	168	15.3	21.7	28	35.2	40.8	40.8	168	-10.9	-8.4	-8.9	-4.1	1.5	-10.9	1.5
169	26.2	30.1	36.9	39.3	39.3	39.3	169	15.3	21.7	28	35.2	40.8	40.8	169	-10.9	-8.4	-8.9	-4.1	1.5	-10.9	1.5
170	26.2	30.1	36.9	39.3	39.3	39.3	170	15.3	21.7	28	35.2	40.8	40.8	170	-10.9	-8.4	-8.9	-4.1	1.5	-10.9	1.5
171	26.2	30.1	36.9	39.3	39.3	39.3	171	15.3	21.7	28	35.2	40.8	40.8	171	-10.9	-8.4	-8.9	-4.1	1.5	-10.9	1.5
172	7.2	10.8	18.5	28.8	33	33	172	4.8	6.8	11.9	22.6	33.5	33.5	172	-2.4	-4	-6.6	-6.2	0.5	-6.6	0.5
173	7.2	10.8	18.5	28.8	33	33	173	4.8	6.8	11.9	22.6	33.5	33.5	173	-2.4	-4	-6.6	-6.2	0.5	-6.6	0.5
174	37.1	38.8	42.1	47.8	48.6	48.6	174	28.9	35.2	36.5	44.2	50	50	174	-8.2	-3.6	-5.6	-3.6	1.4	-8.2	1.4
175	37.1	38.8	42.1	47.8	48.6	48.6	175	28.9	35.2	36.5	44.2	50	50	175	-8.2	-3.6	-5.6	-3.6	1.4	-8.2	1.4
176	37.1	38.8	42.1	47.8	48.6	48.6	176	28.9	35.2	36.5	44.2	50	50	176	-8.2	-3.6	-5.6	-3.6	1.4	-8.2	1.4
177	37.1	38.8	42.1	47.8	48.6	48.6	177	28.9	35.2	36.5	44.2	50	50	177	-8.2	-3.6	-5.6	-3.6	1.4	-8.2	1.4
178	37.7	38.1	38.2	46.1	54.5	54.5	178	39	39	39.2	45.8	55.2	55.2	178	1.3	0.9	1	-0.3	0.7	-0.3	1.3
179	37.7	38.1	38.2	46.1	54.5	54.5	179	39	39	39.2	45.8	55.2	55.2	179	1.3	0.9	1	-0.3	0.7	-0.3	1.3
180	37.7	38.1	38.2	46.1	54.5	54.5	180	39	39	39.2	45.8	55.2	55.2	180	1.3	0.9	1	-0.3	0.7	-0.3	1.3
181	37.7	38.1	38.2	46.1	54.5	54.5	181	39	39	39.2	45.8	55.2	55.2	181	1.3	0.9	1	-0.3	0.7	-0.3	1.3
182	37.7	38.1	38.2	46.1	54.5	54.5	182	39	39	39.2	45.8	55.2	55.2	182	1.3	0.9	1	-0.3	0.7	-0.3	1.3
183	37.7	38.1	38.2	46.1	54.5	54.5	183	39	39	39.2	45.8	55.2	55.2	183	1.3	0.9	1	-0.3	0.7	-0.3	1.3
184	37.7	38.1	38.2	46.1	54.5	54.5	184	39	39	39.2	45.8	55.2	55.2	184	1.3	0.9	1	-0.3	0.7	-0.3	1.3
185	37.7	38.1	38.2	46.1	54.5	54.5	185	39	39	39.2	45.8	55.2	55.2	185	1.3	0.9	1	-0.3	0.7	-0.3	1.3
186	37.7	38.1	38.2	46.1	54.5	54.5	186	39	39	39.2	45.8	55.2	55.2	186	1.3	0.9	1	-0.3	0.7	-0.3	1.3
187	35.9	36	37.7	45.7	52.1	52.1	187	36.6	38.2	38.4	46.5	54.1	54.1	187	0.7	2.2	0.7	0.8	2	0.7	2.2
188	13.4	16.7	25.5	35.4	35.1	35.4	188	16.4	19.2	27.2	36.8	36.1	36.8	188	3	2.5	1.7	1.4	1	1	3
189	13.4	16.7	25.5	35.4	35.1	35.4	189	16.4	19.2	27.2	36.8	36.1	36.8	189	3	2.5	1.7	1.4	1	1	3
190	17.5	22.1	34.9	47.9	47.5	47.9	190	20.1	24.1	36	48.3	47.7	48.3	190	2.6	2	1.1	0.4	0.2	0.2	2.6
191	17.5	22.1	34.9	47.9	47.5	47.9	191	20.1	24.1	36	48.3	47.7	48.3	191	2.6	2	1.1	0.4	0.2	0.2	2.6
192	17.5	22.1	34.9	47.9	47.5	47.9	192	20.1	24.1	36	48.3	47.7	48.3	192	2.6	2	1.1	0.4	0.2	0.2	2.6
193	17.5	22.1	34.9	47.9	47.5	47.9	193	20.1	24.1	36	48.3	47.7	48.3	193	2.6	2	1.1	0.4	0.2	0.2	2.6
194	17.5	22.1	34.9	47.9	47.5	47.9	194	20.1	24.1	36	48.3	47.7	48.3	194	2.6	2	1.1	0.4	0.2	0.2	2.6
195	18.1	20	19.6	19.4	24.6	24.6	195	10.3	13.7	18.3	21	25.1	25.1	195	-7.8	-6.3	-1.3	1.6	0.5	-7.8	1.6
196	18.1	20	19.6	19.4	24.6	24.6	196	10.3	13.7	18.3	21	25.1	25.1	196	-7.8	-6.3	-1.3	1.6	0.5	-7.8	1.6
197	18.1	20	19.6	19.4	24.6	24.6	197	10.3	13.7	18.3	21	25.1	25.1	197	-7.8	-6.3	-1.3	1.6	0.5	-7.8	1.6
198	18.1	20	19.6	19.4	24.6	24.6	198	10.3	13.7	18.3	21	25.1	25.1	198	-7.8	-6.3	-1.3	1.6	0.5	-7.8	1.6
199	16	17.1	17	18.2	27.1	27.1	199	9.7	13	17.6	19.7	26.8	26.8	199	-6.3	-4.1	0.6	1.5	-0.3	-6.3	1.5
200	14	14.3	13.9	15.2	23.2	23.2	200	8.2	10.8	14.5	16.6	22.9	22.9	200	-5.8	-3.5	0.6	1.4	-0.3	-5.8	1.4
201							201							201
202							202							202
203							203							203
204							204							204
205							205							205
206							206							206

## Sheet: ResidueHDX_ArnB
ArnB	Deuterium uptake (%)						ArnB~P	Deuterium uptake (%)						ArnA/ArnB~P	Deuterium uptake (%)						ArnB~P versus ArnB	Difference in deuterium uptake (%)							ArnA/ArnB~P versus ArnB	Difference in deuterium uptake (%)							ArnA/ArnB~P versus ArnB~P	Difference in deuterium uptake (%)
	HDX time (s)							HDX time (s)							HDX time (s)							HDX time (s)					Maximal diff.			HDX time (s)					Maximal diff.			HDX time (s)					Maximal diff.
Residue	10	30	100	1000	10000	Maximal	Residue	10	30	100	1000	10000	Maximal	Residue	10	30	100	1000	10000	Maximal	Residue	10	30	100	1000	10000	Lowest	Highest	Residue	10	30	100	1000	10000	Lowest	Highest	Residue	10	30	100	1000	10000	Lowest	Highest
1							1							1							1								1								1
2	37.5	40.4	43.5	47.3	56.3	56.3	2	37.9	42	45.9	53.4	56.2	56.2	2	37.7	41.2	46.4	53.3	56.3	56.3	2	0.4	1.6	2.4	6.1	-0.1	-0.1	6.1	2	0.2	0.8	2.9	6	0	0	6	2	-0.2	-0.8	0.5	-0.1	0.1	-0.8	0.5
3	37.5	40.4	43.5	47.3	56.3	56.3	3	37.9	42	45.9	53.4	56.2	56.2	3	37.7	41.2	46.4	53.3	56.3	56.3	3	0.4	1.6	2.4	6.1	-0.1	-0.1	6.1	3	0.2	0.8	2.9	6	0	0	6	3	-0.2	-0.8	0.5	-0.1	0.1	-0.8	0.5
4	53.3	57.5	61.1	65.9	78.5	78.5	4	57.8	63.1	67	75.1	79.1	79.1	4	57.5	62.3	67.4	75.9	79.3	79.3	4	4.5	5.6	5.9	9.2	0.6	0.6	9.2	4	4.2	4.8	6.3	10	0.8	0.8	10	4	-0.3	-0.8	0.4	0.8	0.2	-0.8	0.8
5	53.3	57.5	61.1	65.9	78.5	78.5	5	57.8	63.1	67	75.1	79.1	79.1	5	57.5	62.3	67.4	75.9	79.3	79.3	5	4.5	5.6	5.9	9.2	0.6	0.6	9.2	5	4.2	4.8	6.3	10	0.8	0.8	10	5	-0.3	-0.8	0.4	0.8	0.2	-0.8	0.8
6	53.3	57.5	61.1	65.9	78.5	78.5	6	57.8	63.1	67	75.1	79.1	79.1	6	57.5	62.3	67.4	75.9	79.3	79.3	6	4.5	5.6	5.9	9.2	0.6	0.6	9.2	6	4.2	4.8	6.3	10	0.8	0.8	10	6	-0.3	-0.8	0.4	0.8	0.2	-0.8	0.8
7	42.8	46.1	51.4	59.4	66.3	66.3	7	43.1	47.1	52.2	63.5	65.5	65.5	7	43	46.8	51.5	63.5	66	66	7	0.3	1	0.8	4.1	-0.8	-0.8	4.1	7	0.2	0.7	0.1	4.1	-0.3	-0.3	4.1	7	-0.1	-0.3	-0.7	0	0.5	-0.7	0.5
8	13.8	15.2	17.8	20.2	25	25	8	13.3	16.1	17.9	19.9	24.9	24.9	8	11.5	13.2	15.2	18.5	19.5	19.5	8	-0.5	0.9	0.1	-0.3	-0.1	-0.5	0.9	8	-2.3	-2	-2.6	-1.7	-5.5	-5.5	-1.7	8	-1.8	-2.9	-2.7	-1.4	-5.4	-5.4	-1.4
9	13.8	15.2	17.8	20.2	25	25	9	13.3	16.1	17.9	19.9	24.9	24.9	9	11.5	13.2	15.2	18.5	19.5	19.5	9	-0.5	0.9	0.1	-0.3	-0.1	-0.5	0.9	9	-2.3	-2	-2.6	-1.7	-5.5	-5.5	-1.7	9	-1.8	-2.9	-2.7	-1.4	-5.4	-5.4	-1.4
10	13.8	15.2	17.8	20.2	25	25	10	13.3	16.1	17.9	19.9	24.9	24.9	10	11.5	13.2	15.2	18.5	19.5	19.5	10	-0.5	0.9	0.1	-0.3	-0.1	-0.5	0.9	10	-2.3	-2	-2.6	-1.7	-5.5	-5.5	-1.7	10	-1.8	-2.9	-2.7	-1.4	-5.4	-5.4	-1.4
11	13.8	15.2	17.8	20.2	25	25	11	13.3	16.1	17.9	19.9	24.9	24.9	11	11.5	13.2	15.2	18.5	19.5	19.5	11	-0.5	0.9	0.1	-0.3	-0.1	-0.5	0.9	11	-2.3	-2	-2.6	-1.7	-5.5	-5.5	-1.7	11	-1.8	-2.9	-2.7	-1.4	-5.4	-5.4	-1.4
12	13.8	15.2	17.8	20.2	25	25	12	13.3	16.1	17.9	19.9	24.9	24.9	12	11.5	13.2	15.2	18.5	19.5	19.5	12	-0.5	0.9	0.1	-0.3	-0.1	-0.5	0.9	12	-2.3	-2	-2.6	-1.7	-5.5	-5.5	-1.7	12	-1.8	-2.9	-2.7	-1.4	-5.4	-5.4	-1.4
13	13.8	15.2	17.8	20.2	25	25	13	13.3	16.1	17.9	19.9	24.9	24.9	13	11.5	13.2	15.2	18.5	19.5	19.5	13	-0.5	0.9	0.1	-0.3	-0.1	-0.5	0.9	13	-2.3	-2	-2.6	-1.7	-5.5	-5.5	-1.7	13	-1.8	-2.9	-2.7	-1.4	-5.4	-5.4	-1.4
14	20.7	21.7	23.3	31.9	40.2	40.2	14	19.6	20.6	22.1	31.1	39.4	39.4	14	17.9	19.4	20.1	23.3	28.8	28.8	14	-1.1	-1.1	-1.2	-0.8	-0.8	-1.2	-0.8	14	-2.8	-2.3	-3.2	-8.6	-11.4	-11.4	-2.3	14	-1.7	-1.2	-2	-7.8	-10.6	-10.6	-1.2
15	20.8	21.4	22.9	29.5	36.1	36.1	15	20.5	21.4	22.8	30	36.2	36.2	15	19.2	20.8	22	24.7	28.6	28.6	15	-0.3	0	-0.1	0.5	0.1	-0.3	0.5	15	-1.6	-0.6	-0.9	-4.8	-7.5	-7.5	-0.6	15	-1.3	-0.6	-0.8	-5.3	-7.6	-7.6	-0.6
16	20.8	21.4	22.9	29.5	36.1	36.1	16	20.5	21.4	22.8	30	36.2	36.2	16	19.2	20.8	22	24.7	28.6	28.6	16	-0.3	0	-0.1	0.5	0.1	-0.3	0.5	16	-1.6	-0.6	-0.9	-4.8	-7.5	-7.5	-0.6	16	-1.3	-0.6	-0.8	-5.3	-7.6	-7.6	-0.6
17	20.8	21.4	22.9	29.5	36.1	36.1	17	20.5	21.4	22.8	30	36.2	36.2	17	19.2	20.8	22	24.7	28.6	28.6	17	-0.3	0	-0.1	0.5	0.1	-0.3	0.5	17	-1.6	-0.6	-0.9	-4.8	-7.5	-7.5	-0.6	17	-1.3	-0.6	-0.8	-5.3	-7.6	-7.6	-0.6
18	20.8	21.4	22.9	29.5	36.1	36.1	18	20.5	21.4	22.8	30	36.2	36.2	18	19.2	20.8	22	24.7	28.6	28.6	18	-0.3	0	-0.1	0.5	0.1	-0.3	0.5	18	-1.6	-0.6	-0.9	-4.8	-7.5	-7.5	-0.6	18	-1.3	-0.6	-0.8	-5.3	-7.6	-7.6	-0.6
19	29.6	30.1	31.8	41.1	57.3	57.3	19	29.8	27.6	32.9	38.7	57.4	57.4	19	28.1	27.9	30.6	35.7	42.7	42.7	19	0.2	-2.5	1.1	-2.4	0.1	-2.5	1.1	19	-1.5	-2.2	-1.2	-5.4	-14.6	-14.6	-1.2	19	-1.7	0.3	-2.3	-3	-14.7	-14.7	0.3
20	29.6	30.1	31.8	41.1	57.3	57.3	20	29.8	27.6	32.9	38.7	57.4	57.4	20	28.1	27.9	30.6	35.7	42.7	42.7	20	0.2	-2.5	1.1	-2.4	0.1	-2.5	1.1	20	-1.5	-2.2	-1.2	-5.4	-14.6	-14.6	-1.2	20	-1.7	0.3	-2.3	-3	-14.7	-14.7	0.3
21	29.6	30.1	31.8	41.1	57.3	57.3	21	29.8	27.6	32.9	38.7	57.4	57.4	21	28.1	27.9	30.6	35.7	42.7	42.7	21	0.2	-2.5	1.1	-2.4	0.1	-2.5	1.1	21	-1.5	-2.2	-1.2	-5.4	-14.6	-14.6	-1.2	21	-1.7	0.3	-2.3	-3	-14.7	-14.7	0.3
22	29.6	30.1	31.8	41.1	57.3	57.3	22	29.8	27.6	32.9	38.7	57.4	57.4	22	28.1	27.9	30.6	35.7	42.7	42.7	22	0.2	-2.5	1.1	-2.4	0.1	-2.5	1.1	22	-1.5	-2.2	-1.2	-5.4	-14.6	-14.6	-1.2	22	-1.7	0.3	-2.3	-3	-14.7	-14.7	0.3
23	29.6	30.1	31.8	41.1	57.3	57.3	23	29.8	27.6	32.9	38.7	57.4	57.4	23	28.1	27.9	30.6	35.7	42.7	42.7	23	0.2	-2.5	1.1	-2.4	0.1	-2.5	1.1	23	-1.5	-2.2	-1.2	-5.4	-14.6	-14.6	-1.2	23	-1.7	0.3	-2.3	-3	-14.7	-14.7	0.3
24	20.8	21.4	22.9	29.5	36.1	36.1	24	20.5	21.4	22.8	30	36.2	36.2	24	19.2	20.8	22	24.7	28.6	28.6	24	-0.3	0	-0.1	0.5	0.1	-0.3	0.5	24	-1.6	-0.6	-0.9	-4.8	-7.5	-7.5	-0.6	24	-1.3	-0.6	-0.8	-5.3	-7.6	-7.6	-0.6
25	20.8	21.4	22.9	29.5	36.1	36.1	25	20.5	21.4	22.8	30	36.2	36.2	25	19.2	20.8	22	24.7	28.6	28.6	25	-0.3	0	-0.1	0.5	0.1	-0.3	0.5	25	-1.6	-0.6	-0.9	-4.8	-7.5	-7.5	-0.6	25	-1.3	-0.6	-0.8	-5.3	-7.6	-7.6	-0.6
26	17	17.5	17.7	19.9	35.2	35.2	26	15.2	17.2	17.6	21.1	36.1	36.1	26	14.1	16.3	17.8	21.1	36.6	36.6	26	-1.8	-0.3	-0.1	1.2	0.9	-1.8	1.2	26	-2.9	-1.2	0.1	1.2	1.4	-2.9	1.4	26	-1.1	-0.9	0.2	0	0.5	-1.1	0.5
27	17	17.5	17.7	19.9	35.2	35.2	27	15.2	17.2	17.6	21.1	36.1	36.1	27	14.1	16.3	17.8	21.1	36.6	36.6	27	-1.8	-0.3	-0.1	1.2	0.9	-1.8	1.2	27	-2.9	-1.2	0.1	1.2	1.4	-2.9	1.4	27	-1.1	-0.9	0.2	0	0.5	-1.1	0.5
28	17	17.5	17.7	19.9	35.2	35.2	28	15.2	17.2	17.6	21.1	36.1	36.1	28	14.1	16.3	17.8	21.1	36.6	36.6	28	-1.8	-0.3	-0.1	1.2	0.9	-1.8	1.2	28	-2.9	-1.2	0.1	1.2	1.4	-2.9	1.4	28	-1.1	-0.9	0.2	0	0.5	-1.1	0.5
29	55.7	57	57.2	61.3	80.7	80.7	29	53	56.4	55.8	60.9	78.4	78.4	29	52.7	56.7	57.3	62.7	81.3	81.3	29	-2.7	-0.6	-1.4	-0.4	-2.3	-2.7	-0.4	29	-3	-0.3	0.1	1.4	0.6	-3	1.4	29	-0.3	0.3	1.5	1.8	2.9	-0.3	2.9
30	55.7	57	57.2	61.3	80.7	80.7	30	53	56.4	55.8	60.9	78.4	78.4	30	52.7	56.7	57.3	62.7	81.3	81.3	30	-2.7	-0.6	-1.4	-0.4	-2.3	-2.7	-0.4	30	-3	-0.3	0.1	1.4	0.6	-3	1.4	30	-0.3	0.3	1.5	1.8	2.9	-0.3	2.9
31	55.7	57	57.2	61.3	80.7	80.7	31	53	56.4	55.8	60.9	78.4	78.4	31	52.7	56.7	57.3	62.7	81.3	81.3	31	-2.7	-0.6	-1.4	-0.4	-2.3	-2.7	-0.4	31	-3	-0.3	0.1	1.4	0.6	-3	1.4	31	-0.3	0.3	1.5	1.8	2.9	-0.3	2.9
32	50.7	51.7	51.6	53	62.6	62.6	32	49.3	50.7	50.3	52.2	61.2	61.2	32	47.2	49.2	50.2	52.3	61.3	61.3	32	-1.4	-1	-1.3	-0.8	-1.4	-1.4	-0.8	32	-3.5	-2.5	-1.4	-0.7	-1.3	-3.5	-0.7	32	-2.1	-1.5	-0.1	0.1	0.1	-2.1	0.1
33	50.7	51.7	51.6	53	62.6	62.6	33	49.3	50.7	50.3	52.2	61.2	61.2	33	47.2	49.2	50.2	52.3	61.3	61.3	33	-1.4	-1	-1.3	-0.8	-1.4	-1.4	-0.8	33	-3.5	-2.5	-1.4	-0.7	-1.3	-3.5	-0.7	33	-2.1	-1.5	-0.1	0.1	0.1	-2.1	0.1
34	54.9	57.4	53.5	57.4	64.8	64.8	34	54.7	57.9	54.5	59.2	64.4	64.4	34	54.3	57.4	55.2	57.7	66.2	66.2	34	-0.2	0.5	1	1.8	-0.4	-0.4	1.8	34	-0.6	0	1.7	0.3	1.4	-0.6	1.7	34	-0.4	-0.5	0.7	-1.5	1.8	-1.5	1.8
35	17.4	18.6	18.7	19	20.1	20.1	35	18.6	19.6	19.8	21.6	22	22	35	18.8	19.5	20.3	22	22.2	22.2	35	1.2	1	1.1	2.6	1.9	1	2.6	35	1.4	0.9	1.6	3	2.1	0.9	3	35	0.2	-0.1	0.5	0.4	0.2	-0.1	0.5
36	17.4	18.6	18.7	19	20.1	20.1	36	18.6	19.6	19.8	21.6	22	22	36	18.8	19.5	20.3	22	22.2	22.2	36	1.2	1	1.1	2.6	1.9	1	2.6	36	1.4	0.9	1.6	3	2.1	0.9	3	36	0.2	-0.1	0.5	0.4	0.2	-0.1	0.5
37	17.4	18.6	18.7	19	20.1	20.1	37	18.6	19.6	19.8	21.6	22	22	37	18.8	19.5	20.3	22	22.2	22.2	37	1.2	1	1.1	2.6	1.9	1	2.6	37	1.4	0.9	1.6	3	2.1	0.9	3	37	0.2	-0.1	0.5	0.4	0.2	-0.1	0.5
38	-0.1	-0.2	0	-0.2	-0.1	0	38	0.1	0	-0.2	-0.1	-0.1	0.1	38	1.1	0.9	0.6	0.6	0.4	1.1	38	0.2	0.2	-0.2	0.1	0	-0.2	0.2	38	1.2	1.1	0.6	0.8	0.5	0.5	1.2	38	1	0.9	0.8	0.7	0.5	0.5	1
39	-0.1	-0.2	0	-0.2	-0.1	0	39	0.1	0	-0.2	-0.1	-0.1	0.1	39	1.1	0.9	0.6	0.6	0.4	1.1	39	0.2	0.2	-0.2	0.1	0	-0.2	0.2	39	1.2	1.1	0.6	0.8	0.5	0.5	1.2	39	1	0.9	0.8	0.7	0.5	0.5	1
40	1.8	1.8	2	2	2.2	2.2	40	2.6	2.6	2.4	2.2	2.2	2.6	40	2.7	2.7	2.2	2.1	2	2.7	40	0.8	0.8	0.4	0.2	0	0	0.8	40	0.9	0.9	0.2	0.1	-0.2	-0.2	0.9	40	0.1	0.1	-0.2	-0.1	-0.2	-0.2	0.1
41	2	0.6	0.8	0.5	0.3	2	41	0.9	1.5	1.4	1.9	2.4	2.4	41	1.9	1.8	2.5	2.4	2.5	2.5	41	-1.1	0.9	0.6	1.4	2.1	-1.1	2.1	41	-0.1	1.2	1.7	1.9	2.2	-0.1	2.2	41	1	0.3	1.1	0.5	0.1	0.1	1.1
42	2	0.6	0.8	0.5	0.3	2	42	0.9	1.5	1.4	1.9	2.4	2.4	42	1.9	1.8	2.5	2.4	2.5	2.5	42	-1.1	0.9	0.6	1.4	2.1	-1.1	2.1	42	-0.1	1.2	1.7	1.9	2.2	-0.1	2.2	42	1	0.3	1.1	0.5	0.1	0.1	1.1
43	2	0.6	0.8	0.5	0.3	2	43	0.9	1.5	1.4	1.9	2.4	2.4	43	1.9	1.8	2.5	2.4	2.5	2.5	43	-1.1	0.9	0.6	1.4	2.1	-1.1	2.1	43	-0.1	1.2	1.7	1.9	2.2	-0.1	2.2	43	1	0.3	1.1	0.5	0.1	0.1	1.1
44							44							44							44								44								44
45	21.4	22.5	23	24.2	32	32	45	17.8	20.8	22.1	24.8	29.2	29.2	45	15.5	19	20.7	23.4	27.7	27.7	45	-3.6	-1.7	-0.9	0.6	-2.8	-3.6	0.6	45	-5.9	-3.5	-2.3	-0.8	-4.3	-5.9	-0.8	45	-2.3	-1.8	-1.4	-1.4	-1.5	-2.3	-1.4
46	21.4	22.5	23	24.2	32	32	46	17.8	20.8	22.1	24.8	29.2	29.2	46	15.5	19	20.7	23.4	27.7	27.7	46	-3.6	-1.7	-0.9	0.6	-2.8	-3.6	0.6	46	-5.9	-3.5	-2.3	-0.8	-4.3	-5.9	-0.8	46	-2.3	-1.8	-1.4	-1.4	-1.5	-2.3	-1.4
47	21.4	22.5	23	24.2	32	32	47	17.8	20.8	22.1	24.8	29.2	29.2	47	15.5	19	20.7	23.4	27.7	27.7	47	-3.6	-1.7	-0.9	0.6	-2.8	-3.6	0.6	47	-5.9	-3.5	-2.3	-0.8	-4.3	-5.9	-0.8	47	-2.3	-1.8	-1.4	-1.4	-1.5	-2.3	-1.4
48	21.4	22.5	23	24.2	32	32	48	17.8	20.8	22.1	24.8	29.2	29.2	48	15.5	19	20.7	23.4	27.7	27.7	48	-3.6	-1.7	-0.9	0.6	-2.8	-3.6	0.6	48	-5.9	-3.5	-2.3	-0.8	-4.3	-5.9	-0.8	48	-2.3	-1.8	-1.4	-1.4	-1.5	-2.3	-1.4
49	21.4	22.5	23	24.2	32	32	49	17.8	20.8	22.1	24.8	29.2	29.2	49	15.5	19	20.7	23.4	27.7	27.7	49	-3.6	-1.7	-0.9	0.6	-2.8	-3.6	0.6	49	-5.9	-3.5	-2.3	-0.8	-4.3	-5.9	-0.8	49	-2.3	-1.8	-1.4	-1.4	-1.5	-2.3	-1.4
50	21.4	22.5	23	24.2	32	32	50	17.8	20.8	22.1	24.8	29.2	29.2	50	15.5	19	20.7	23.4	27.7	27.7	50	-3.6	-1.7	-0.9	0.6	-2.8	-3.6	0.6	50	-5.9	-3.5	-2.3	-0.8	-4.3	-5.9	-0.8	50	-2.3	-1.8	-1.4	-1.4	-1.5	-2.3	-1.4
51	33.8	36.3	36.8	37.4	44.4	44.4	51	27.4	31.6	34.5	37.1	40.6	40.6	51	24.8	29.3	34.1	38.1	40.4	40.4	51	-6.4	-4.7	-2.3	-0.3	-3.8	-6.4	-0.3	51	-9	-7	-2.7	0.7	-4	-9	0.7	51	-2.6	-2.3	-0.4	1	-0.2	-2.6	1
52							52							52							52								52								52
53							53							53							53								53								53
54							54							54							54								54								54
55							55							55							55								55								55
56	6.4	8.6	17.2	45.7	58.6	58.6	56	4.9	6.9	12	33.9	53.5	53.5	56	5.1	7	11.9	31.2	53.1	53.1	56	-1.5	-1.7	-5.2	-11.8	-5.1	-11.8	-1.5	56	-1.3	-1.6	-5.3	-14.5	-5.5	-14.5	-1.3	56	0.2	0.1	-0.1	-2.7	-0.4	-2.7	0.2
57	6.4	8.6	17.2	45.7	58.6	58.6	57	4.9	6.9	12	33.9	53.5	53.5	57	5.1	7	11.9	31.2	53.1	53.1	57	-1.5	-1.7	-5.2	-11.8	-5.1	-11.8	-1.5	57	-1.3	-1.6	-5.3	-14.5	-5.5	-14.5	-1.3	57	0.2	0.1	-0.1	-2.7	-0.4	-2.7	0.2
58	4.8	5.9	11.8	40	55.8	55.8	58	4.7	5.4	8.3	28.5	49.7	49.7	58	4.6	5.1	6.8	23.2	46.9	46.9	58	-0.1	-0.5	-3.5	-11.5	-6.1	-11.5	-0.1	58	-0.2	-0.8	-5	-16.8	-8.9	-16.8	-0.2	58	-0.1	-0.3	-1.5	-5.3	-2.8	-5.3	-0.1
59	4.8	5.9	11.8	40	55.8	55.8	59	4.7	5.4	8.3	28.5	49.7	49.7	59	4.6	5.1	6.8	23.2	46.9	46.9	59	-0.1	-0.5	-3.5	-11.5	-6.1	-11.5	-0.1	59	-0.2	-0.8	-5	-16.8	-8.9	-16.8	-0.2	59	-0.1	-0.3	-1.5	-5.3	-2.8	-5.3	-0.1
60	4.8	5.9	11.8	40	55.8	55.8	60	4.7	5.4	8.3	28.5	49.7	49.7	60	4.6	5.1	6.8	23.2	46.9	46.9	60	-0.1	-0.5	-3.5	-11.5	-6.1	-11.5	-0.1	60	-0.2	-0.8	-5	-16.8	-8.9	-16.8	-0.2	60	-0.1	-0.3	-1.5	-5.3	-2.8	-5.3	-0.1
61	4.8	5.9	11.8	40	55.8	55.8	61	4.7	5.4	8.3	28.5	49.7	49.7	61	4.6	5.1	6.8	23.2	46.9	46.9	61	-0.1	-0.5	-3.5	-11.5	-6.1	-11.5	-0.1	61	-0.2	-0.8	-5	-16.8	-8.9	-16.8	-0.2	61	-0.1	-0.3	-1.5	-5.3	-2.8	-5.3	-0.1
62	4.2	4.7	8.6	30.1	53	53	62	3.2	4	4.9	18.9	42.4	42.4	62	3.4	3.7	5.2	17.2	41.8	41.8	62	-1	-0.7	-3.7	-11.2	-10.6	-11.2	-0.7	62	-0.8	-1	-3.4	-12.9	-11.2	-12.9	-0.8	62	0.2	-0.3	0.3	-1.7	-0.6	-1.7	0.3
63	4.2	4.7	8.6	30.1	53	53	63	3.2	4	4.9	18.9	42.4	42.4	63	3.4	3.7	5.2	17.2	41.8	41.8	63	-1	-0.7	-3.7	-11.2	-10.6	-11.2	-0.7	63	-0.8	-1	-3.4	-12.9	-11.2	-12.9	-0.8	63	0.2	-0.3	0.3	-1.7	-0.6	-1.7	0.3
64	4.2	4.7	8.6	30.1	53	53	64	3.2	4	4.9	18.9	42.4	42.4	64	3.4	3.7	5.2	17.2	41.8	41.8	64	-1	-0.7	-3.7	-11.2	-10.6	-11.2	-0.7	64	-0.8	-1	-3.4	-12.9	-11.2	-12.9	-0.8	64	0.2	-0.3	0.3	-1.7	-0.6	-1.7	0.3
65	4.2	4.7	8.6	30.1	53	53	65	3.2	4	4.9	18.9	42.4	42.4	65	3.4	3.7	5.2	17.2	41.8	41.8	65	-1	-0.7	-3.7	-11.2	-10.6	-11.2	-0.7	65	-0.8	-1	-3.4	-12.9	-11.2	-12.9	-0.8	65	0.2	-0.3	0.3	-1.7	-0.6	-1.7	0.3
66	22.5	23.8	29.3	44.2	56.4	56.4	66	23.8	27.7	32.6	54.8	57.2	57.2	66	24	28.4	33.2	52.6	58.8	58.8	66	1.3	3.9	3.3	10.6	0.8	0.8	10.6	66	1.5	4.6	3.9	8.4	2.4	1.5	8.4	66	0.2	0.7	0.6	-2.2	1.6	-2.2	1.6
67	20.1	20.7	24.4	39.6	52.2	52.2	67	20.4	22.5	27.4	49.3	52.5	52.5	67	20.6	23.4	28.2	48.1	54.2	54.2	67	0.3	1.8	3	9.7	0.3	0.3	9.7	67	0.5	2.7	3.8	8.5	2	0.5	8.5	67	0.2	0.9	0.8	-1.2	1.7	-1.2	1.7
68	20.1	20.7	24.4	39.6	52.2	52.2	68	20.4	22.5	27.4	49.3	52.5	52.5	68	20.6	23.4	28.2	48.1	54.2	54.2	68	0.3	1.8	3	9.7	0.3	0.3	9.7	68	0.5	2.7	3.8	8.5	2	0.5	8.5	68	0.2	0.9	0.8	-1.2	1.7	-1.2	1.7
69	20.1	20.7	24.4	39.6	52.2	52.2	69	20.4	22.5	27.4	49.3	52.5	52.5	69	20.6	23.4	28.2	48.1	54.2	54.2	69	0.3	1.8	3	9.7	0.3	0.3	9.7	69	0.5	2.7	3.8	8.5	2	0.5	8.5	69	0.2	0.9	0.8	-1.2	1.7	-1.2	1.7
70	20.1	20.7	24.4	39.6	52.2	52.2	70	20.4	22.5	27.4	49.3	52.5	52.5	70	20.6	23.4	28.2	48.1	54.2	54.2	70	0.3	1.8	3	9.7	0.3	0.3	9.7	70	0.5	2.7	3.8	8.5	2	0.5	8.5	70	0.2	0.9	0.8	-1.2	1.7	-1.2	1.7
71	20.1	20.7	24.4	39.6	52.2	52.2	71	20.4	22.5	27.4	49.3	52.5	52.5	71	20.6	23.4	28.2	48.1	54.2	54.2	71	0.3	1.8	3	9.7	0.3	0.3	9.7	71	0.5	2.7	3.8	8.5	2	0.5	8.5	71	0.2	0.9	0.8	-1.2	1.7	-1.2	1.7
72	8.4	10	15.9	37.1	42.8	42.8	72	8.1	10.4	16.9	39	42	42	72	9	10.8	18	39.4	42.7	42.7	72	-0.3	0.4	1	1.9	-0.8	-0.8	1.9	72	0.6	0.8	2.1	2.3	-0.1	-0.1	2.3	72	0.9	0.4	1.1	0.4	0.7	0.4	1.1
73	3.5	5.1	12.6	36.8	43.3	43.3	73	3.8	6.1	13.6	39.4	42.6	42.6	73	4.6	6.7	14.9	39.8	43.1	43.1	73	0.3	1	1	2.6	-0.7	-0.7	2.6	73	1.1	1.6	2.3	3	-0.2	-0.2	3	73	0.8	0.6	1.3	0.4	0.5	0.4	1.3
74	3.5	5.1	12.6	36.8	43.3	43.3	74	3.8	6.1	13.6	39.4	42.6	42.6	74	4.6	6.7	14.9	39.8	43.1	43.1	74	0.3	1	1	2.6	-0.7	-0.7	2.6	74	1.1	1.6	2.3	3	-0.2	-0.2	3	74	0.8	0.6	1.3	0.4	0.5	0.4	1.3
75	3.5	5.1	12.6	36.8	43.3	43.3	75	3.8	6.1	13.6	39.4	42.6	42.6	75	4.6	6.7	14.9	39.8	43.1	43.1	75	0.3	1	1	2.6	-0.7	-0.7	2.6	75	1.1	1.6	2.3	3	-0.2	-0.2	3	75	0.8	0.6	1.3	0.4	0.5	0.4	1.3
76	3.5	5.1	12.6	36.8	43.3	43.3	76	3.8	6.1	13.6	39.4	42.6	42.6	76	4.6	6.7	14.9	39.8	43.1	43.1	76	0.3	1	1	2.6	-0.7	-0.7	2.6	76	1.1	1.6	2.3	3	-0.2	-0.2	3	76	0.8	0.6	1.3	0.4	0.5	0.4	1.3
77	3.5	5.1	12.6	36.8	43.3	43.3	77	3.8	6.1	13.6	39.4	42.6	42.6	77	4.6	6.7	14.9	39.8	43.1	43.1	77	0.3	1	1	2.6	-0.7	-0.7	2.6	77	1.1	1.6	2.3	3	-0.2	-0.2	3	77	0.8	0.6	1.3	0.4	0.5	0.4	1.3
78	15.4	17.4	22	29.1	40.6	40.6	78	14.4	16.7	21.4	29.1	40.6	40.6	78	15	17.1	22.2	30	41.9	41.9	78	-1	-0.7	-0.6	0	0	-1	0	78	-0.4	-0.3	0.2	0.9	1.3	-0.4	1.3	78	0.6	0.4	0.8	0.9	1.3	0.4	1.3
79	18.7	20.6	26.6	35	47.5	47.5	79	18.1	20.9	26.3	35.4	47	47	79	18.8	21.3	27.5	36.2	48.2	48.2	79	-0.6	0.3	-0.3	0.4	-0.5	-0.6	0.4	79	0.1	0.7	0.9	1.2	0.7	0.1	1.2	79	0.7	0.4	1.2	0.8	1.2	0.4	1.2
80	18.7	20.6	26.6	35	47.5	47.5	80	18.1	20.9	26.3	35.4	47	47	80	18.8	21.3	27.5	36.2	48.2	48.2	80	-0.6	0.3	-0.3	0.4	-0.5	-0.6	0.4	80	0.1	0.7	0.9	1.2	0.7	0.1	1.2	80	0.7	0.4	1.2	0.8	1.2	0.4	1.2
81	18.7	20.6	26.6	35	47.5	47.5	81	18.1	20.9	26.3	35.4	47	47	81	18.8	21.3	27.5	36.2	48.2	48.2	81	-0.6	0.3	-0.3	0.4	-0.5	-0.6	0.4	81	0.1	0.7	0.9	1.2	0.7	0.1	1.2	81	0.7	0.4	1.2	0.8	1.2	0.4	1.2
82	18.7	20.6	26.6	35	47.5	47.5	82	18.1	20.9	26.3	35.4	47	47	82	18.8	21.3	27.5	36.2	48.2	48.2	82	-0.6	0.3	-0.3	0.4	-0.5	-0.6	0.4	82	0.1	0.7	0.9	1.2	0.7	0.1	1.2	82	0.7	0.4	1.2	0.8	1.2	0.4	1.2
83	40.1	40.6	44.5	56.9	61.9	61.9	83	40.2	41	44.2	56.8	61.9	61.9	83	40	41.4	44	56.4	62	62	83	0.1	0.4	-0.3	-0.1	0	-0.3	0.4	83	-0.1	0.8	-0.5	-0.5	0.1	-0.5	0.8	83	-0.2	0.4	-0.2	-0.4	0.1	-0.4	0.4
84	17.6	19.2	25.7	44.5	51.9	51.9	84	16.9	19.1	24.1	43.2	51.3	51.3	84	17.8	19.6	24.3	43.6	52.6	52.6	84	-0.7	-0.1	-1.6	-1.3	-0.6	-1.6	-0.1	84	0.2	0.4	-1.4	-0.9	0.7	-1.4	0.7	84	0.9	0.5	0.2	0.4	1.3	0.2	1.3
85	17.6	19.2	25.7	44.5	51.9	51.9	85	16.9	19.1	24.1	43.2	51.3	51.3	85	17.8	19.6	24.3	43.6	52.6	52.6	85	-0.7	-0.1	-1.6	-1.3	-0.6	-1.6	-0.1	85	0.2	0.4	-1.4	-0.9	0.7	-1.4	0.7	85	0.9	0.5	0.2	0.4	1.3	0.2	1.3
86	17.6	19.2	25.7	44.5	51.9	51.9	86	16.9	19.1	24.1	43.2	51.3	51.3	86	17.8	19.6	24.3	43.6	52.6	52.6	86	-0.7	-0.1	-1.6	-1.3	-0.6	-1.6	-0.1	86	0.2	0.4	-1.4	-0.9	0.7	-1.4	0.7	86	0.9	0.5	0.2	0.4	1.3	0.2	1.3
87	17.6	19.2	25.7	44.5	51.9	51.9	87	16.9	19.1	24.1	43.2	51.3	51.3	87	17.8	19.6	24.3	43.6	52.6	52.6	87	-0.7	-0.1	-1.6	-1.3	-0.6	-1.6	-0.1	87	0.2	0.4	-1.4	-0.9	0.7	-1.4	0.7	87	0.9	0.5	0.2	0.4	1.3	0.2	1.3
88	47	51.2	51.6	51.3	49.9	51.6	88	46.8	50.8	50.1	50.3	49.3	50.8	88	48.9	52.3	52	52.2	50.5	52.3	88	-0.2	-0.4	-1.5	-1	-0.6	-1.5	-0.2	88	1.9	1.1	0.4	0.9	0.6	0.4	1.9	88	2.1	1.5	1.9	1.9	1.2	1.2	2.1
89	47	51.2	51.6	51.3	49.9	51.6	89	46.8	50.8	50.1	50.3	49.3	50.8	89	48.9	52.3	52	52.2	50.5	52.3	89	-0.2	-0.4	-1.5	-1	-0.6	-1.5	-0.2	89	1.9	1.1	0.4	0.9	0.6	0.4	1.9	89	2.1	1.5	1.9	1.9	1.2	1.2	2.1
90	47	51.2	51.6	51.3	49.9	51.6	90	46.8	50.8	50.1	50.3	49.3	50.8	90	48.9	52.3	52	52.2	50.5	52.3	90	-0.2	-0.4	-1.5	-1	-0.6	-1.5	-0.2	90	1.9	1.1	0.4	0.9	0.6	0.4	1.9	90	2.1	1.5	1.9	1.9	1.2	1.2	2.1
91	51.9	52	50.9	50.1	49.6	52	91	50.5	51.4	50.1	50.5	49.4	51.4	91	51	50.9	49.9	50.2	49.6	51	91	-1.4	-0.6	-0.8	0.4	-0.2	-1.4	0.4	91	-0.9	-1.1	-1	0.1	0	-1.1	0.1	91	0.5	-0.5	-0.2	-0.3	0.2	-0.5	0.5
92	51.9	52	50.9	50.1	49.6	52	92	50.5	51.4	50.1	50.5	49.4	51.4	92	51	50.9	49.9	50.2	49.6	51	92	-1.4	-0.6	-0.8	0.4	-0.2	-1.4	0.4	92	-0.9	-1.1	-1	0.1	0	-1.1	0.1	92	0.5	-0.5	-0.2	-0.3	0.2	-0.5	0.5
93	51.9	52	50.9	50.1	49.6	52	93	50.5	51.4	50.1	50.5	49.4	51.4	93	51	50.9	49.9	50.2	49.6	51	93	-1.4	-0.6	-0.8	0.4	-0.2	-1.4	0.4	93	-0.9	-1.1	-1	0.1	0	-1.1	0.1	93	0.5	-0.5	-0.2	-0.3	0.2	-0.5	0.5
94	51.9	52	50.9	50.1	49.6	52	94	50.5	51.4	50.1	50.5	49.4	51.4	94	51	50.9	49.9	50.2	49.6	51	94	-1.4	-0.6	-0.8	0.4	-0.2	-1.4	0.4	94	-0.9	-1.1	-1	0.1	0	-1.1	0.1	94	0.5	-0.5	-0.2	-0.3	0.2	-0.5	0.5
95	51.9	52	50.9	50.1	49.6	52	95	50.5	51.4	50.1	50.5	49.4	51.4	95	51	50.9	49.9	50.2	49.6	51	95	-1.4	-0.6	-0.8	0.4	-0.2	-1.4	0.4	95	-0.9	-1.1	-1	0.1	0	-1.1	0.1	95	0.5	-0.5	-0.2	-0.3	0.2	-0.5	0.5
96	51.9	52	50.9	50.1	49.6	52	96	50.5	51.4	50.1	50.5	49.4	51.4	96	51	50.9	49.9	50.2	49.6	51	96	-1.4	-0.6	-0.8	0.4	-0.2	-1.4	0.4	96	-0.9	-1.1	-1	0.1	0	-1.1	0.1	96	0.5	-0.5	-0.2	-0.3	0.2	-0.5	0.5
97							97							97							97								97								97
98	63.6	65.3	65.2	68.3	67.8	68.3	98	61.7	64.7	65.9	68	66.8	68	98	60.4	64.3	65.8	67.7	66.9	67.7	98	-1.9	-0.6	0.7	-0.3	-1	-1.9	0.7	98	-3.2	-1	0.6	-0.6	-0.9	-3.2	0.6	98	-1.3	-0.4	-0.1	-0.3	0.1	-1.3	0.1
99	63.6	65.3	65.2	68.3	67.8	68.3	99	61.7	64.7	65.9	68	66.8	68	99	60.4	64.3	65.8	67.7	66.9	67.7	99	-1.9	-0.6	0.7	-0.3	-1	-1.9	0.7	99	-3.2	-1	0.6	-0.6	-0.9	-3.2	0.6	99	-1.3	-0.4	-0.1	-0.3	0.1	-1.3	0.1
100	63.6	65.3	65.2	68.3	67.8	68.3	100	61.7	64.7	65.9	68	66.8	68	100	60.4	64.3	65.8	67.7	66.9	67.7	100	-1.9	-0.6	0.7	-0.3	-1	-1.9	0.7	100	-3.2	-1	0.6	-0.6	-0.9	-3.2	0.6	100	-1.3	-0.4	-0.1	-0.3	0.1	-1.3	0.1
101	57	58.3	58.4	62.4	62	62.4	101	55.6	58	59	61.9	60.6	61.9	101	55.4	58.4	59.8	62.2	61.8	62.2	101	-1.4	-0.3	0.6	-0.5	-1.4	-1.4	0.6	101	-1.6	0.1	1.4	-0.2	-0.2	-1.6	1.4	101	-0.2	0.4	0.8	0.3	1.2	-0.2	1.2
102	57	58.3	58.4	62.4	62	62.4	102	55.6	58	59	61.9	60.6	61.9	102	55.4	58.4	59.8	62.2	61.8	62.2	102	-1.4	-0.3	0.6	-0.5	-1.4	-1.4	0.6	102	-1.6	0.1	1.4	-0.2	-0.2	-1.6	1.4	102	-0.2	0.4	0.8	0.3	1.2	-0.2	1.2
103	57	58.3	58.4	62.4	62	62.4	103	55.6	58	59	61.9	60.6	61.9	103	55.4	58.4	59.8	62.2	61.8	62.2	103	-1.4	-0.3	0.6	-0.5	-1.4	-1.4	0.6	103	-1.6	0.1	1.4	-0.2	-0.2	-1.6	1.4	103	-0.2	0.4	0.8	0.3	1.2	-0.2	1.2
104	57	58.3	58.4	62.4	62	62.4	104	55.6	58	59	61.9	60.6	61.9	104	55.4	58.4	59.8	62.2	61.8	62.2	104	-1.4	-0.3	0.6	-0.5	-1.4	-1.4	0.6	104	-1.6	0.1	1.4	-0.2	-0.2	-1.6	1.4	104	-0.2	0.4	0.8	0.3	1.2	-0.2	1.2
105	57	58.3	58.4	62.4	62	62.4	105	55.6	58	59	61.9	60.6	61.9	105	55.4	58.4	59.8	62.2	61.8	62.2	105	-1.4	-0.3	0.6	-0.5	-1.4	-1.4	0.6	105	-1.6	0.1	1.4	-0.2	-0.2	-1.6	1.4	105	-0.2	0.4	0.8	0.3	1.2	-0.2	1.2
106	57	58.3	58.4	62.4	62	62.4	106	55.6	58	59	61.9	60.6	61.9	106	55.4	58.4	59.8	62.2	61.8	62.2	106	-1.4	-0.3	0.6	-0.5	-1.4	-1.4	0.6	106	-1.6	0.1	1.4	-0.2	-0.2	-1.6	1.4	106	-0.2	0.4	0.8	0.3	1.2	-0.2	1.2
107	57	58.3	58.4	62.4	62	62.4	107	55.6	58	59	61.9	60.6	61.9	107	55.4	58.4	59.8	62.2	61.8	62.2	107	-1.4	-0.3	0.6	-0.5	-1.4	-1.4	0.6	107	-1.6	0.1	1.4	-0.2	-0.2	-1.6	1.4	107	-0.2	0.4	0.8	0.3	1.2	-0.2	1.2
108	57	58.3	58.4	62.4	62	62.4	108	55.6	58	59	61.9	60.6	61.9	108	55.4	58.4	59.8	62.2	61.8	62.2	108	-1.4	-0.3	0.6	-0.5	-1.4	-1.4	0.6	108	-1.6	0.1	1.4	-0.2	-0.2	-1.6	1.4	108	-0.2	0.4	0.8	0.3	1.2	-0.2	1.2
109	57	58.3	58.4	62.4	62	62.4	109	55.6	58	59	61.9	60.6	61.9	109	55.4	58.4	59.8	62.2	61.8	62.2	109	-1.4	-0.3	0.6	-0.5	-1.4	-1.4	0.6	109	-1.6	0.1	1.4	-0.2	-0.2	-1.6	1.4	109	-0.2	0.4	0.8	0.3	1.2	-0.2	1.2
110	57	58.3	58.4	62.4	62	62.4	110	55.6	58	59	61.9	60.6	61.9	110	55.4	58.4	59.8	62.2	61.8	62.2	110	-1.4	-0.3	0.6	-0.5	-1.4	-1.4	0.6	110	-1.6	0.1	1.4	-0.2	-0.2	-1.6	1.4	110	-0.2	0.4	0.8	0.3	1.2	-0.2	1.2
111	57	58.3	58.4	62.4	62	62.4	111	55.6	58	59	61.9	60.6	61.9	111	55.4	58.4	59.8	62.2	61.8	62.2	111	-1.4	-0.3	0.6	-0.5	-1.4	-1.4	0.6	111	-1.6	0.1	1.4	-0.2	-0.2	-1.6	1.4	111	-0.2	0.4	0.8	0.3	1.2	-0.2	1.2
112	57	58.3	58.4	62.4	62	62.4	112	55.6	58	59	61.9	60.6	61.9	112	55.4	58.4	59.8	62.2	61.8	62.2	112	-1.4	-0.3	0.6	-0.5	-1.4	-1.4	0.6	112	-1.6	0.1	1.4	-0.2	-0.2	-1.6	1.4	112	-0.2	0.4	0.8	0.3	1.2	-0.2	1.2
113	0	1.5	1.2	3.3	12.2	12.2	113	2.1	-1.4	3.4	2.4	14	14	113	3.3	0.1	3.8	5	13.7	13.7	113	2.1	-2.9	2.2	-0.9	1.8	-2.9	2.2	113	3.3	-1.4	2.6	1.7	1.5	-1.4	3.3	113	1.2	1.5	0.4	2.6	-0.3	-0.3	2.6
114	0	1.5	1.2	3.3	12.2	12.2	114	2.1	-1.4	3.4	2.4	14	14	114	3.3	0.1	3.8	5	13.7	13.7	114	2.1	-2.9	2.2	-0.9	1.8	-2.9	2.2	114	3.3	-1.4	2.6	1.7	1.5	-1.4	3.3	114	1.2	1.5	0.4	2.6	-0.3	-0.3	2.6
115	0	1.5	1.2	3.3	12.2	12.2	115	2.1	-1.4	3.4	2.4	14	14	115	3.3	0.1	3.8	5	13.7	13.7	115	2.1	-2.9	2.2	-0.9	1.8	-2.9	2.2	115	3.3	-1.4	2.6	1.7	1.5	-1.4	3.3	115	1.2	1.5	0.4	2.6	-0.3	-0.3	2.6
116	0	1.5	1.2	3.3	12.2	12.2	116	2.1	-1.4	3.4	2.4	14	14	116	3.3	0.1	3.8	5	13.7	13.7	116	2.1	-2.9	2.2	-0.9	1.8	-2.9	2.2	116	3.3	-1.4	2.6	1.7	1.5	-1.4	3.3	116	1.2	1.5	0.4	2.6	-0.3	-0.3	2.6
117	1.3	2.6	2.4	3.1	9.6	9.6	117	3.1	0.4	4.1	2.9	11.7	11.7	117	3.4	1.2	3.5	4.7	10.2	10.2	117	1.8	-2.2	1.7	-0.2	2.1	-2.2	2.1	117	2.1	-1.4	1.1	1.6	0.6	-1.4	2.1	117	0.3	0.8	-0.6	1.8	-1.5	-1.5	1.8
118	1.3	2.6	2.4	3.1	9.6	9.6	118	3.1	0.4	4.1	2.9	11.7	11.7	118	3.4	1.2	3.5	4.7	10.2	10.2	118	1.8	-2.2	1.7	-0.2	2.1	-2.2	2.1	118	2.1	-1.4	1.1	1.6	0.6	-1.4	2.1	118	0.3	0.8	-0.6	1.8	-1.5	-1.5	1.8
119	1.2	1.7	1.5	2.4	7.4	7.4	119	2.8	0.9	3.1	2.5	8.4	8.4	119	2.9	1.9	3.4	3.8	8.4	8.4	119	1.6	-0.8	1.6	0.1	1	-0.8	1.6	119	1.7	0.2	1.9	1.4	1	0.2	1.9	119	0.1	1	0.3	1.3	0	0	1.3
120	1.2	1.7	1.5	2.4	7.4	7.4	120	2.8	0.9	3.1	2.5	8.4	8.4	120	2.9	1.9	3.4	3.8	8.4	8.4	120	1.6	-0.8	1.6	0.1	1	-0.8	1.6	120	1.7	0.2	1.9	1.4	1	0.2	1.9	120	0.1	1	0.3	1.3	0	0	1.3
121	10.8	14.9	18.8	20.5	22	22	121	10.2	13.9	17.8	20.6	22	22	121	9.6	12.7	16.2	20	23.1	23.1	121	-0.6	-1	-1	0.1	0	-1	0.1	121	-1.2	-2.2	-2.6	-0.5	1.1	-2.6	1.1	121	-0.6	-1.2	-1.6	-0.6	1.1	-1.6	1.1
122	12.2	18	23.4	24.4	24.6	24.6	122	11.9	16.2	21.3	24.4	25.6	25.6	122	11.5	15.5	20.6	24.8	26.1	26.1	122	-0.3	-1.8	-2.1	0	1	-2.1	1	122	-0.7	-2.5	-2.8	0.4	1.5	-2.8	1.5	122	-0.4	-0.7	-0.7	0.4	0.5	-0.7	0.5
123	12.2	18	23.4	24.4	24.6	24.6	123	11.9	16.2	21.3	24.4	25.6	25.6	123	11.5	15.5	20.6	24.8	26.1	26.1	123	-0.3	-1.8	-2.1	0	1	-2.1	1	123	-0.7	-2.5	-2.8	0.4	1.5	-2.8	1.5	123	-0.4	-0.7	-0.7	0.4	0.5	-0.7	0.5
124	12.2	18	23.4	24.4	24.6	24.6	124	11.9	16.2	21.3	24.4	25.6	25.6	124	11.5	15.5	20.6	24.8	26.1	26.1	124	-0.3	-1.8	-2.1	0	1	-2.1	1	124	-0.7	-2.5	-2.8	0.4	1.5	-2.8	1.5	124	-0.4	-0.7	-0.7	0.4	0.5	-0.7	0.5
125	12.2	18	23.4	24.4	24.6	24.6	125	11.9	16.2	21.3	24.4	25.6	25.6	125	11.5	15.5	20.6	24.8	26.1	26.1	125	-0.3	-1.8	-2.1	0	1	-2.1	1	125	-0.7	-2.5	-2.8	0.4	1.5	-2.8	1.5	125	-0.4	-0.7	-0.7	0.4	0.5	-0.7	0.5
126	12.2	18	23.4	24.4	24.6	24.6	126	11.9	16.2	21.3	24.4	25.6	25.6	126	11.5	15.5	20.6	24.8	26.1	26.1	126	-0.3	-1.8	-2.1	0	1	-2.1	1	126	-0.7	-2.5	-2.8	0.4	1.5	-2.8	1.5	126	-0.4	-0.7	-0.7	0.4	0.5	-0.7	0.5
127	1.7	1.7	1.9	2	2.9	2.9	127	1.1	1.3	1.4	2.3	5.9	5.9	127	1.8	2	1.8	3.5	7.3	7.3	127	-0.6	-0.4	-0.5	0.3	3	-0.6	3	127	0.1	0.3	-0.1	1.5	4.4	-0.1	4.4	127	0.7	0.7	0.4	1.2	1.4	0.4	1.4
128	1.7	1.7	1.9	2	2.9	2.9	128	1.1	1.3	1.4	2.3	5.9	5.9	128	1.8	2	1.8	3.5	7.3	7.3	128	-0.6	-0.4	-0.5	0.3	3	-0.6	3	128	0.1	0.3	-0.1	1.5	4.4	-0.1	4.4	128	0.7	0.7	0.4	1.2	1.4	0.4	1.4
129	1.7	1.7	1.9	2	2.9	2.9	129	1.1	1.3	1.4	2.3	5.9	5.9	129	1.8	2	1.8	3.5	7.3	7.3	129	-0.6	-0.4	-0.5	0.3	3	-0.6	3	129	0.1	0.3	-0.1	1.5	4.4	-0.1	4.4	129	0.7	0.7	0.4	1.2	1.4	0.4	1.4
130	1.7	1.7	1.9	2	2.9	2.9	130	1.1	1.3	1.4	2.3	5.9	5.9	130	1.8	2	1.8	3.5	7.3	7.3	130	-0.6	-0.4	-0.5	0.3	3	-0.6	3	130	0.1	0.3	-0.1	1.5	4.4	-0.1	4.4	130	0.7	0.7	0.4	1.2	1.4	0.4	1.4
131	1.7	1.7	1.9	2	2.9	2.9	131	1.1	1.3	1.4	2.3	5.9	5.9	131	1.8	2	1.8	3.5	7.3	7.3	131	-0.6	-0.4	-0.5	0.3	3	-0.6	3	131	0.1	0.3	-0.1	1.5	4.4	-0.1	4.4	131	0.7	0.7	0.4	1.2	1.4	0.4	1.4
132	1.7	1.7	1.9	2	2.9	2.9	132	1.1	1.3	1.4	2.3	5.9	5.9	132	1.8	2	1.8	3.5	7.3	7.3	132	-0.6	-0.4	-0.5	0.3	3	-0.6	3	132	0.1	0.3	-0.1	1.5	4.4	-0.1	4.4	132	0.7	0.7	0.4	1.2	1.4	0.4	1.4
133	1.7	1.7	1.9	2	2.9	2.9	133	1.1	1.3	1.4	2.3	5.9	5.9	133	1.8	2	1.8	3.5	7.3	7.3	133	-0.6	-0.4	-0.5	0.3	3	-0.6	3	133	0.1	0.3	-0.1	1.5	4.4	-0.1	4.4	133	0.7	0.7	0.4	1.2	1.4	0.4	1.4
134							134							134							134								134								134
135	43.9	44.2	43.9	47.3	48.8	48.8	135	41.6	42.1	41.8	45.7	47.5	47.5	135	41.7	41.8	41.8	45.3	47.9	47.9	135	-2.3	-2.1	-2.1	-1.6	-1.3	-2.3	-1.3	135	-2.2	-2.4	-2.1	-2	-0.9	-2.4	-0.9	135	0.1	-0.3	0	-0.4	0.4	-0.4	0.4
136	43.9	44.2	43.9	47.3	48.8	48.8	136	41.6	42.1	41.8	45.7	47.5	47.5	136	41.7	41.8	41.8	45.3	47.9	47.9	136	-2.3	-2.1	-2.1	-1.6	-1.3	-2.3	-1.3	136	-2.2	-2.4	-2.1	-2	-0.9	-2.4	-0.9	136	0.1	-0.3	0	-0.4	0.4	-0.4	0.4
137	43.9	44.2	43.9	47.3	48.8	48.8	137	41.6	42.1	41.8	45.7	47.5	47.5	137	41.7	41.8	41.8	45.3	47.9	47.9	137	-2.3	-2.1	-2.1	-1.6	-1.3	-2.3	-1.3	137	-2.2	-2.4	-2.1	-2	-0.9	-2.4	-0.9	137	0.1	-0.3	0	-0.4	0.4	-0.4	0.4
138	43.9	44.2	43.9	47.3	48.8	48.8	138	41.6	42.1	41.8	45.7	47.5	47.5	138	41.7	41.8	41.8	45.3	47.9	47.9	138	-2.3	-2.1	-2.1	-1.6	-1.3	-2.3	-1.3	138	-2.2	-2.4	-2.1	-2	-0.9	-2.4	-0.9	138	0.1	-0.3	0	-0.4	0.4	-0.4	0.4
139	43.9	44.2	43.9	47.3	48.8	48.8	139	41.6	42.1	41.8	45.7	47.5	47.5	139	41.7	41.8	41.8	45.3	47.9	47.9	139	-2.3	-2.1	-2.1	-1.6	-1.3	-2.3	-1.3	139	-2.2	-2.4	-2.1	-2	-0.9	-2.4	-0.9	139	0.1	-0.3	0	-0.4	0.4	-0.4	0.4
140	43.9	44.2	43.9	47.3	48.8	48.8	140	41.6	42.1	41.8	45.7	47.5	47.5	140	41.7	41.8	41.8	45.3	47.9	47.9	140	-2.3	-2.1	-2.1	-1.6	-1.3	-2.3	-1.3	140	-2.2	-2.4	-2.1	-2	-0.9	-2.4	-0.9	140	0.1	-0.3	0	-0.4	0.4	-0.4	0.4
141	43.9	44.2	43.9	47.3	48.8	48.8	141	41.6	42.1	41.8	45.7	47.5	47.5	141	41.7	41.8	41.8	45.3	47.9	47.9	141	-2.3	-2.1	-2.1	-1.6	-1.3	-2.3	-1.3	141	-2.2	-2.4	-2.1	-2	-0.9	-2.4	-0.9	141	0.1	-0.3	0	-0.4	0.4	-0.4	0.4
142	43.9	44.2	43.9	47.3	48.8	48.8	142	41.6	42.1	41.8	45.7	47.5	47.5	142	41.7	41.8	41.8	45.3	47.9	47.9	142	-2.3	-2.1	-2.1	-1.6	-1.3	-2.3	-1.3	142	-2.2	-2.4	-2.1	-2	-0.9	-2.4	-0.9	142	0.1	-0.3	0	-0.4	0.4	-0.4	0.4
143	43.9	44.2	43.9	47.3	48.8	48.8	143	41.6	42.1	41.8	45.7	47.5	47.5	143	41.7	41.8	41.8	45.3	47.9	47.9	143	-2.3	-2.1	-2.1	-1.6	-1.3	-2.3	-1.3	143	-2.2	-2.4	-2.1	-2	-0.9	-2.4	-0.9	143	0.1	-0.3	0	-0.4	0.4	-0.4	0.4
144	43.9	44.2	43.9	47.3	48.8	48.8	144	41.6	42.1	41.8	45.7	47.5	47.5	144	41.7	41.8	41.8	45.3	47.9	47.9	144	-2.3	-2.1	-2.1	-1.6	-1.3	-2.3	-1.3	144	-2.2	-2.4	-2.1	-2	-0.9	-2.4	-0.9	144	0.1	-0.3	0	-0.4	0.4	-0.4	0.4
145	43.9	44.2	43.9	47.3	48.8	48.8	145	41.6	42.1	41.8	45.7	47.5	47.5	145	41.7	41.8	41.8	45.3	47.9	47.9	145	-2.3	-2.1	-2.1	-1.6	-1.3	-2.3	-1.3	145	-2.2	-2.4	-2.1	-2	-0.9	-2.4	-0.9	145	0.1	-0.3	0	-0.4	0.4	-0.4	0.4
146	43.9	44.2	43.9	47.3	48.8	48.8	146	41.6	42.1	41.8	45.7	47.5	47.5	146	41.7	41.8	41.8	45.3	47.9	47.9	146	-2.3	-2.1	-2.1	-1.6	-1.3	-2.3	-1.3	146	-2.2	-2.4	-2.1	-2	-0.9	-2.4	-0.9	146	0.1	-0.3	0	-0.4	0.4	-0.4	0.4
147	46	46.1	46.1	48.3	49.5	49.5	147	44.4	44.8	44.2	47.6	48.9	48.9	147	43.6	43.6	43.6	46.6	48.8	48.8	147	-1.6	-1.3	-1.9	-0.7	-0.6	-1.9	-0.6	147	-2.4	-2.5	-2.5	-1.7	-0.7	-2.5	-0.7	147	-0.8	-1.2	-0.6	-1	-0.1	-1.2	-0.1
148	64.7	64.6	63.5	62.9	62.1	64.7	148	63.1	63.7	62.6	63	61.7	63.7	148	62.7	63.7	63	64.1	63.3	64.1	148	-1.6	-0.9	-0.9	0.1	-0.4	-1.6	0.1	148	-2	-0.9	-0.5	1.2	1.2	-2	1.2	148	-0.4	0	0.4	1.1	1.6	-0.4	1.6
149	64.7	64.6	63.5	62.9	62.1	64.7	149	63.1	63.7	62.6	63	61.7	63.7	149	62.7	63.7	63	64.1	63.3	64.1	149	-1.6	-0.9	-0.9	0.1	-0.4	-1.6	0.1	149	-2	-0.9	-0.5	1.2	1.2	-2	1.2	149	-0.4	0	0.4	1.1	1.6	-0.4	1.6
150	64.7	64.6	63.5	62.9	62.1	64.7	150	63.1	63.7	62.6	63	61.7	63.7	150	62.7	63.7	63	64.1	63.3	64.1	150	-1.6	-0.9	-0.9	0.1	-0.4	-1.6	0.1	150	-2	-0.9	-0.5	1.2	1.2	-2	1.2	150	-0.4	0	0.4	1.1	1.6	-0.4	1.6
151	58.1	59.1	59.5	60.7	61.1	61.1	151	56	58	58	59.9	60	60	151	55.5	57	57.5	59.2	60.4	60.4	151	-2.1	-1.1	-1.5	-0.8	-1.1	-2.1	-0.8	151	-2.6	-2.1	-2	-1.5	-0.7	-2.6	-0.7	151	-0.5	-1	-0.5	-0.7	0.4	-1	0.4
152	40.6	38.4	38.1	38.1	38.8	40.6	152	40	40.1	39.1	38.9	38.6	40.1	152	40.6	40.7	40	40.3	39.8	40.7	152	-0.6	1.7	1	0.8	-0.2	-0.6	1.7	152	0	2.3	1.9	2.2	1	0	2.3	152	0.6	0.6	0.9	1.4	1.2	0.6	1.4
153	40.6	38.4	38.1	38.1	38.8	40.6	153	40	40.1	39.1	38.9	38.6	40.1	153	40.6	40.7	40	40.3	39.8	40.7	153	-0.6	1.7	1	0.8	-0.2	-0.6	1.7	153	0	2.3	1.9	2.2	1	0	2.3	153	0.6	0.6	0.9	1.4	1.2	0.6	1.4
154	40.6	38.4	38.1	38.1	38.8	40.6	154	40	40.1	39.1	38.9	38.6	40.1	154	40.6	40.7	40	40.3	39.8	40.7	154	-0.6	1.7	1	0.8	-0.2	-0.6	1.7	154	0	2.3	1.9	2.2	1	0	2.3	154	0.6	0.6	0.9	1.4	1.2	0.6	1.4
155	53	53.1	52.2	51.7	51.2	53.1	155	51.9	52.4	50.3	50.8	49.8	52.4	155	52.7	52.7	51.6	51.7	51.3	52.7	155	-1.1	-0.7	-1.9	-0.9	-1.4	-1.9	-0.7	155	-0.3	-0.4	-0.6	0	0.1	-0.6	0.1	155	0.8	0.3	1.3	0.9	1.5	0.3	1.5
156	53	53.1	52.2	51.7	51.2	53.1	156	51.9	52.4	50.3	50.8	49.8	52.4	156	52.7	52.7	51.6	51.7	51.3	52.7	156	-1.1	-0.7	-1.9	-0.9	-1.4	-1.9	-0.7	156	-0.3	-0.4	-0.6	0	0.1	-0.6	0.1	156	0.8	0.3	1.3	0.9	1.5	0.3	1.5
157							157							157							157								157								157
158	0	-0.3	0.1	0.1	0.7	0.7	158	1.3	1.5	1.3	2.4	7.8	7.8	158	2.2	2.5	2.2	2.6	9.1	9.1	158	1.3	1.8	1.2	2.3	7.1	1.2	7.1	158	2.2	2.8	2.1	2.5	8.4	2.1	8.4	158	0.9	1	0.9	0.2	1.3	0.2	1.3
159	0	-0.3	0.1	0.1	0.7	0.7	159	1.3	1.5	1.3	2.4	7.8	7.8	159	2.2	2.5	2.2	2.6	9.1	9.1	159	1.3	1.8	1.2	2.3	7.1	1.2	7.1	159	2.2	2.8	2.1	2.5	8.4	2.1	8.4	159	0.9	1	0.9	0.2	1.3	0.2	1.3
160	0	-0.3	0.1	0.1	0.7	0.7	160	1.3	1.5	1.3	2.4	7.8	7.8	160	2.2	2.5	2.2	2.6	9.1	9.1	160	1.3	1.8	1.2	2.3	7.1	1.2	7.1	160	2.2	2.8	2.1	2.5	8.4	2.1	8.4	160	0.9	1	0.9	0.2	1.3	0.2	1.3
161	0	-0.3	0.1	0.1	0.7	0.7	161	1.3	1.5	1.3	2.4	7.8	7.8	161	2.2	2.5	2.2	2.6	9.1	9.1	161	1.3	1.8	1.2	2.3	7.1	1.2	7.1	161	2.2	2.8	2.1	2.5	8.4	2.1	8.4	161	0.9	1	0.9	0.2	1.3	0.2	1.3
162	1	2	1.8	2	2.1	2.1	162	2.2	-0.4	2.8	1.4	7.7	7.7	162	1.9	2.2	2.5	3.3	9.3	9.3	162	1.2	-2.4	1	-0.6	5.6	-2.4	5.6	162	0.9	0.2	0.7	1.3	7.2	0.2	7.2	162	-0.3	2.6	-0.3	1.9	1.6	-0.3	2.6
163	7.5	7.5	8.4	13.9	18.1	18.1	163	12.9	13.7	14	16.8	19.4	19.4	163	13.7	14	14.1	16.8	20.3	20.3	163	5.4	6.2	5.6	2.9	1.3	1.3	6.2	163	6.2	6.5	5.7	2.9	2.2	2.2	6.5	163	0.8	0.3	0.1	0	0.9	0	0.9
164	26.7	27	27.3	31.8	39.2	39.2	164	30.5	32.1	32.3	34	38.9	38.9	164	29.4	30.9	31.5	33.4	38.4	38.4	164	3.8	5.1	5	2.2	-0.3	-0.3	5.1	164	2.7	3.9	4.2	1.6	-0.8	-0.8	4.2	164	-1.1	-1.2	-0.8	-0.6	-0.5	-1.2	-0.5
165	26.7	27	27.3	31.8	39.2	39.2	165	30.5	32.1	32.3	34	38.9	38.9	165	29.4	30.9	31.5	33.4	38.4	38.4	165	3.8	5.1	5	2.2	-0.3	-0.3	5.1	165	2.7	3.9	4.2	1.6	-0.8	-0.8	4.2	165	-1.1	-1.2	-0.8	-0.6	-0.5	-1.2	-0.5
166	26.7	27	27.3	31.8	39.2	39.2	166	30.5	32.1	32.3	34	38.9	38.9	166	29.4	30.9	31.5	33.4	38.4	38.4	166	3.8	5.1	5	2.2	-0.3	-0.3	5.1	166	2.7	3.9	4.2	1.6	-0.8	-0.8	4.2	166	-1.1	-1.2	-0.8	-0.6	-0.5	-1.2	-0.5
167	26.7	27	27.3	31.8	39.2	39.2	167	30.5	32.1	32.3	34	38.9	38.9	167	29.4	30.9	31.5	33.4	38.4	38.4	167	3.8	5.1	5	2.2	-0.3	-0.3	5.1	167	2.7	3.9	4.2	1.6	-0.8	-0.8	4.2	167	-1.1	-1.2	-0.8	-0.6	-0.5	-1.2	-0.5
168	26.7	27	27.3	31.8	39.2	39.2	168	30.5	32.1	32.3	34	38.9	38.9	168	29.4	30.9	31.5	33.4	38.4	38.4	168	3.8	5.1	5	2.2	-0.3	-0.3	5.1	168	2.7	3.9	4.2	1.6	-0.8	-0.8	4.2	168	-1.1	-1.2	-0.8	-0.6	-0.5	-1.2	-0.5
169	12.2	18.6	27.5	48.4	50.3	50.3	169	25.1	28.1	36.2	50	50.4	50.4	169	27.4	30.6	38.5	51	52.7	52.7	169	12.9	9.5	8.7	1.6	0.1	0.1	12.9	169	15.2	12	11	2.6	2.4	2.4	15.2	169	2.3	2.5	2.3	1	2.3	1	2.5
170	12.2	18.6	27.5	48.4	50.3	50.3	170	25.1	28.1	36.2	50	50.4	50.4	170	27.4	30.6	38.5	51	52.7	52.7	170	12.9	9.5	8.7	1.6	0.1	0.1	12.9	170	15.2	12	11	2.6	2.4	2.4	15.2	170	2.3	2.5	2.3	1	2.3	1	2.5
171	12.2	18.6	27.5	48.4	50.3	50.3	171	25.1	28.1	36.2	50	50.4	50.4	171	27.4	30.6	38.5	51	52.7	52.7	171	12.9	9.5	8.7	1.6	0.1	0.1	12.9	171	15.2	12	11	2.6	2.4	2.4	15.2	171	2.3	2.5	2.3	1	2.3	1	2.5
172	12.2	18.6	27.5	48.4	50.3	50.3	172	25.1	28.1	36.2	50	50.4	50.4	172	27.4	30.6	38.5	51	52.7	52.7	172	12.9	9.5	8.7	1.6	0.1	0.1	12.9	172	15.2	12	11	2.6	2.4	2.4	15.2	172	2.3	2.5	2.3	1	2.3	1	2.5
173	1.1	0.7	0.6	1.7	9.1	9.1	173	1.7	1.7	2	7.1	24.2	24.2	173	2.1	2.1	2.6	8.2	26.2	26.2	173	0.6	1	1.4	5.4	15.1	0.6	15.1	173	1	1.4	2	6.5	17.1	1	17.1	173	0.4	0.4	0.6	1.1	2	0.4	2
174	0.9	0.9	0.9	2.3	10.7	10.7	174	1.4	1.5	2	7.1	24	24	174	2.2	2.3	3	8.6	25.3	25.3	174	0.5	0.6	1.1	4.8	13.3	0.5	13.3	174	1.3	1.4	2.1	6.3	14.6	1.3	14.6	174	0.8	0.8	1	1.5	1.3	0.8	1.5
175	0.9	0.9	0.9	2.3	10.7	10.7	175	1.4	1.5	2	7.1	24	24	175	2.2	2.3	3	8.6	25.3	25.3	175	0.5	0.6	1.1	4.8	13.3	0.5	13.3	175	1.3	1.4	2.1	6.3	14.6	1.3	14.6	175	0.8	0.8	1	1.5	1.3	0.8	1.5
176	0.9	0.9	0.9	2.3	10.7	10.7	176	1.4	1.5	2	7.1	24	24	176	2.2	2.3	3	8.6	25.3	25.3	176	0.5	0.6	1.1	4.8	13.3	0.5	13.3	176	1.3	1.4	2.1	6.3	14.6	1.3	14.6	176	0.8	0.8	1	1.5	1.3	0.8	1.5
177	0.9	0.9	0.9	2.3	10.7	10.7	177	1.4	1.5	2	7.1	24	24	177	2.2	2.3	3	8.6	25.3	25.3	177	0.5	0.6	1.1	4.8	13.3	0.5	13.3	177	1.3	1.4	2.1	6.3	14.6	1.3	14.6	177	0.8	0.8	1	1.5	1.3	0.8	1.5
178	0.9	0.9	0.9	2.3	10.7	10.7	178	1.4	1.5	2	7.1	24	24	178	2.2	2.3	3	8.6	25.3	25.3	178	0.5	0.6	1.1	4.8	13.3	0.5	13.3	178	1.3	1.4	2.1	6.3	14.6	1.3	14.6	178	0.8	0.8	1	1.5	1.3	0.8	1.5
179	11.3	12.9	15.6	25.1	34.2	34.2	179	20.6	23.5	27.2	33.9	42.4	42.4	179	22.5	25.1	28.8	35.2	45	45	179	9.3	10.6	11.6	8.8	8.2	8.2	11.6	179	11.2	12.2	13.2	10.1	10.8	10.1	13.2	179	1.9	1.6	1.6	1.3	2.6	1.3	2.6
180	11.3	12.9	15.6	25.1	34.2	34.2	180	20.6	23.5	27.2	33.9	42.4	42.4	180	22.5	25.1	28.8	35.2	45	45	180	9.3	10.6	11.6	8.8	8.2	8.2	11.6	180	11.2	12.2	13.2	10.1	10.8	10.1	13.2	180	1.9	1.6	1.6	1.3	2.6	1.3	2.6
181	12.9	14.3	15.4	18.6	33.8	33.8	181	18.4	22.2	26.8	33.3	44.9	44.9	181	20.4	24.9	29.5	34.3	47.3	47.3	181	5.5	7.9	11.4	14.7	11.1	5.5	14.7	181	7.5	10.6	14.1	15.7	13.5	7.5	15.7	181	2	2.7	2.7	1	2.4	1	2.7
182	12.9	14.3	15.4	18.6	33.8	33.8	182	18.4	22.2	26.8	33.3	44.9	44.9	182	20.4	24.9	29.5	34.3	47.3	47.3	182	5.5	7.9	11.4	14.7	11.1	5.5	14.7	182	7.5	10.6	14.1	15.7	13.5	7.5	15.7	182	2	2.7	2.7	1	2.4	1	2.7
183	16.1	17.8	19	21.8	35.6	35.6	183	22.4	26	30.6	36.4	44.3	44.3	183	23.9	28.3	32.9	36.2	45.7	45.7	183	6.3	8.2	11.6	14.6	8.7	6.3	14.6	183	7.8	10.5	13.9	14.4	10.1	7.8	14.4	183	1.5	2.3	2.3	-0.2	1.4	-0.2	2.3
184	15.3	17.5	19	20.2	26.1	26.1	184	20.1	22.5	25.8	30	36.8	36.8	184	21.3	24.7	28.3	30.9	38.9	38.9	184	4.8	5	6.8	9.8	10.7	4.8	10.7	184	6	7.2	9.3	10.7	12.8	6	12.8	184	1.2	2.2	2.5	0.9	2.1	0.9	2.5
185	17.5	19.6	21.6	21.7	28.5	28.5	185	22.3	24.8	28.2	33.3	40.2	40.2	185	22.2	25.5	30	33.2	41.5	41.5	185	4.8	5.2	6.6	11.6	11.7	4.8	11.7	185	4.7	5.9	8.4	11.5	13	4.7	13	185	-0.1	0.7	1.8	-0.1	1.3	-0.1	1.8
186	17.5	19.6	21.6	21.7	28.5	28.5	186	22.3	24.8	28.2	33.3	40.2	40.2	186	22.2	25.5	30	33.2	41.5	41.5	186	4.8	5.2	6.6	11.6	11.7	4.8	11.7	186	4.7	5.9	8.4	11.5	13	4.7	13	186	-0.1	0.7	1.8	-0.1	1.3	-0.1	1.8
187	17.5	19.6	21.6	21.7	28.5	28.5	187	22.3	24.8	28.2	33.3	40.2	40.2	187	22.2	25.5	30	33.2	41.5	41.5	187	4.8	5.2	6.6	11.6	11.7	4.8	11.7	187	4.7	5.9	8.4	11.5	13	4.7	13	187	-0.1	0.7	1.8	-0.1	1.3	-0.1	1.8
188	17.5	19.6	21.6	21.7	28.5	28.5	188	22.3	24.8	28.2	33.3	40.2	40.2	188	22.2	25.5	30	33.2	41.5	41.5	188	4.8	5.2	6.6	11.6	11.7	4.8	11.7	188	4.7	5.9	8.4	11.5	13	4.7	13	188	-0.1	0.7	1.8	-0.1	1.3	-0.1	1.8
189	24.3	27.3	28.2	29	35	35	189	27.6	30.3	32.5	35.9	40.5	40.5	189	27.2	30.2	33.9	36.4	41.4	41.4	189	3.3	3	4.3	6.9	5.5	3	6.9	189	2.9	2.9	5.7	7.4	6.4	2.9	7.4	189	-0.4	-0.1	1.4	0.5	0.9	-0.4	1.4
190	25.6	26.9	28.4	29.1	30.7	30.7	190	34.4	36.5	36.6	39.3	38.7	39.3	190	33.6	36.7	36.7	37.7	39.6	39.6	190	8.8	9.6	8.2	10.2	8	8	10.2	190	8	9.8	8.3	8.6	8.9	8	9.8	190	-0.8	0.2	0.1	-1.6	0.9	-1.6	0.9
191	25.6	26.9	28.4	29.1	30.7	30.7	191	34.4	36.5	36.6	39.3	38.7	39.3	191	33.6	36.7	36.7	37.7	39.6	39.6	191	8.8	9.6	8.2	10.2	8	8	10.2	191	8	9.8	8.3	8.6	8.9	8	9.8	191	-0.8	0.2	0.1	-1.6	0.9	-1.6	0.9
192	25.6	26.9	28.4	29.1	30.7	30.7	192	34.4	36.5	36.6	39.3	38.7	39.3	192	33.6	36.7	36.7	37.7	39.6	39.6	192	8.8	9.6	8.2	10.2	8	8	10.2	192	8	9.8	8.3	8.6	8.9	8	9.8	192	-0.8	0.2	0.1	-1.6	0.9	-1.6	0.9
193							193							193							193								193								193
194	41.1	44.4	45.7	49.8	56.8	56.8	194	46.5	54.1	51.4	57.1	55.6	57.1	194	48	56.1	52.1	54.7	58.3	58.3	194	5.4	9.7	5.7	7.3	-1.2	-1.2	9.7	194	6.9	11.7	6.4	4.9	1.5	1.5	11.7	194	1.5	2	0.7	-2.4	2.7	-2.4	2.7
195	41.1	44.4	45.7	49.8	56.8	56.8	195	46.5	54.1	51.4	57.1	55.6	57.1	195	48	56.1	52.1	54.7	58.3	58.3	195	5.4	9.7	5.7	7.3	-1.2	-1.2	9.7	195	6.9	11.7	6.4	4.9	1.5	1.5	11.7	195	1.5	2	0.7	-2.4	2.7	-2.4	2.7
196	34.6	38.4	38.9	43.9	52.2	52.2	196	43.4	46.2	46.9	49.8	51.8	51.8	196	44.7	48.1	47.7	49.8	53	53	196	8.8	7.8	8	5.9	-0.4	-0.4	8.8	196	10.1	9.7	8.8	5.9	0.8	0.8	10.1	196	1.3	1.9	0.8	0	1.2	0	1.9
197	34.6	38.4	38.9	43.9	52.2	52.2	197	43.4	46.2	46.9	49.8	51.8	51.8	197	44.7	48.1	47.7	49.8	53	53	197	8.8	7.8	8	5.9	-0.4	-0.4	8.8	197	10.1	9.7	8.8	5.9	0.8	0.8	10.1	197	1.3	1.9	0.8	0	1.2	0	1.9
198	34.6	38.4	38.9	43.9	52.2	52.2	198	43.4	46.2	46.9	49.8	51.8	51.8	198	44.7	48.1	47.7	49.8	53	53	198	8.8	7.8	8	5.9	-0.4	-0.4	8.8	198	10.1	9.7	8.8	5.9	0.8	0.8	10.1	198	1.3	1.9	0.8	0	1.2	0	1.9
199	34.6	38.4	38.9	43.9	52.2	52.2	199	43.4	46.2	46.9	49.8	51.8	51.8	199	44.7	48.1	47.7	49.8	53	53	199	8.8	7.8	8	5.9	-0.4	-0.4	8.8	199	10.1	9.7	8.8	5.9	0.8	0.8	10.1	199	1.3	1.9	0.8	0	1.2	0	1.9
200	34.6	38.4	38.9	43.9	52.2	52.2	200	43.4	46.2	46.9	49.8	51.8	51.8	200	44.7	48.1	47.7	49.8	53	53	200	8.8	7.8	8	5.9	-0.4	-0.4	8.8	200	10.1	9.7	8.8	5.9	0.8	0.8	10.1	200	1.3	1.9	0.8	0	1.2	0	1.9
201	34.6	38.4	38.9	43.9	52.2	52.2	201	43.4	46.2	46.9	49.8	51.8	51.8	201	44.7	48.1	47.7	49.8	53	53	201	8.8	7.8	8	5.9	-0.4	-0.4	8.8	201	10.1	9.7	8.8	5.9	0.8	0.8	10.1	201	1.3	1.9	0.8	0	1.2	0	1.9
202	30	34.7	40.3	49.4	53.5	53.5	202	43.3	46	48	54.6	58.1	58.1	202	43.1	45.5	48.5	54.9	59	59	202	13.3	11.3	7.7	5.2	4.6	4.6	13.3	202	13.1	10.8	8.2	5.5	5.5	5.5	13.1	202	-0.2	-0.5	0.5	0.3	0.9	-0.5	0.9
203	21.8	26.1	34.3	51.8	56.5	56.5	203	42.3	45.3	47.5	54.2	55.2	55.2	203	42.7	45	46.8	53.8	55.3	55.3	203	20.5	19.2	13.2	2.4	-1.3	-1.3	20.5	203	20.9	18.9	12.5	2	-1.2	-1.2	20.9	203	0.4	-0.3	-0.7	-0.4	0.1	-0.7	0.4
204	21.8	26.1	34.3	51.8	56.5	56.5	204	42.3	45.3	47.5	54.2	55.2	55.2	204	42.7	45	46.8	53.8	55.3	55.3	204	20.5	19.2	13.2	2.4	-1.3	-1.3	20.5	204	20.9	18.9	12.5	2	-1.2	-1.2	20.9	204	0.4	-0.3	-0.7	-0.4	0.1	-0.7	0.4
205	21.8	26.1	34.3	51.8	56.5	56.5	205	42.3	45.3	47.5	54.2	55.2	55.2	205	42.7	45	46.8	53.8	55.3	55.3	205	20.5	19.2	13.2	2.4	-1.3	-1.3	20.5	205	20.9	18.9	12.5	2	-1.2	-1.2	20.9	205	0.4	-0.3	-0.7	-0.4	0.1	-0.7	0.4
206	21.8	26.1	34.3	51.8	56.5	56.5	206	42.3	45.3	47.5	54.2	55.2	55.2	206	42.7	45	46.8	53.8	55.3	55.3	206	20.5	19.2	13.2	2.4	-1.3	-1.3	20.5	206	20.9	18.9	12.5	2	-1.2	-1.2	20.9	206	0.4	-0.3	-0.7	-0.4	0.1	-0.7	0.4
207	21.8	26.1	34.3	51.8	56.5	56.5	207	42.3	45.3	47.5	54.2	55.2	55.2	207	42.7	45	46.8	53.8	55.3	55.3	207	20.5	19.2	13.2	2.4	-1.3	-1.3	20.5	207	20.9	18.9	12.5	2	-1.2	-1.2	20.9	207	0.4	-0.3	-0.7	-0.4	0.1	-0.7	0.4
208	21.8	26.1	34.3	51.8	56.5	56.5	208	42.3	45.3	47.5	54.2	55.2	55.2	208	42.7	45	46.8	53.8	55.3	55.3	208	20.5	19.2	13.2	2.4	-1.3	-1.3	20.5	208	20.9	18.9	12.5	2	-1.2	-1.2	20.9	208	0.4	-0.3	-0.7	-0.4	0.1	-0.7	0.4
209	3.8	5.8	9.7	20.7	28	28	209	16	17.1	20.5	30.7	38.1	38.1	209	16.6	18.2	20.9	31.4	40.2	40.2	209	12.2	11.3	10.8	10	10.1	10	12.2	209	12.8	12.4	11.2	10.7	12.2	10.7	12.8	209	0.6	1.1	0.4	0.7	2.1	0.4	2.1
210	0.7	0	0.3	0.1	1.7	1.7	210	1.3	1.6	1.5	4.9	12.7	12.7	210	1.8	2.1	2.5	6.2	15.3	15.3	210	0.6	1.6	1.2	4.8	11	0.6	11	210	1.1	2.1	2.2	6.1	13.6	1.1	13.6	210	0.5	0.5	1	1.3	2.6	0.5	2.6
211	0.7	0	0.3	0.1	1.7	1.7	211	1.3	1.6	1.5	4.9	12.7	12.7	211	1.8	2.1	2.5	6.2	15.3	15.3	211	0.6	1.6	1.2	4.8	11	0.6	11	211	1.1	2.1	2.2	6.1	13.6	1.1	13.6	211	0.5	0.5	1	1.3	2.6	0.5	2.6
212	0.7	0	0.3	0.1	1.7	1.7	212	1.3	1.6	1.5	4.9	12.7	12.7	212	1.8	2.1	2.5	6.2	15.3	15.3	212	0.6	1.6	1.2	4.8	11	0.6	11	212	1.1	2.1	2.2	6.1	13.6	1.1	13.6	212	0.5	0.5	1	1.3	2.6	0.5	2.6
213	0.7	0	0.3	0.1	1.7	1.7	213	1.3	1.6	1.5	4.9	12.7	12.7	213	1.8	2.1	2.5	6.2	15.3	15.3	213	0.6	1.6	1.2	4.8	11	0.6	11	213	1.1	2.1	2.2	6.1	13.6	1.1	13.6	213	0.5	0.5	1	1.3	2.6	0.5	2.6
214							214							214							214								214								214
215	57.5	55.6	54.8	54.6	53.8	57.5	215	56.4	59.2	54.4	56.3	53.9	59.2	215	56.1	58.9	54	54.4	54.8	58.9	215	-1.1	3.6	-0.4	1.7	0.1	-1.1	3.6	215	-1.4	3.3	-0.8	-0.2	1	-1.4	3.3	215	-0.3	-0.3	-0.4	-1.9	0.9	-1.9	0.9
216	57.5	55.6	54.8	54.6	53.8	57.5	216	56.4	59.2	54.4	56.3	53.9	59.2	216	56.1	58.9	54	54.4	54.8	58.9	216	-1.1	3.6	-0.4	1.7	0.1	-1.1	3.6	216	-1.4	3.3	-0.8	-0.2	1	-1.4	3.3	216	-0.3	-0.3	-0.4	-1.9	0.9	-1.9	0.9
217	57.5	55.6	54.8	54.6	53.8	57.5	217	56.4	59.2	54.4	56.3	53.9	59.2	217	56.1	58.9	54	54.4	54.8	58.9	217	-1.1	3.6	-0.4	1.7	0.1	-1.1	3.6	217	-1.4	3.3	-0.8	-0.2	1	-1.4	3.3	217	-0.3	-0.3	-0.4	-1.9	0.9	-1.9	0.9
218	57.5	55.6	54.8	54.6	53.8	57.5	218	56.4	59.2	54.4	56.3	53.9	59.2	218	56.1	58.9	54	54.4	54.8	58.9	218	-1.1	3.6	-0.4	1.7	0.1	-1.1	3.6	218	-1.4	3.3	-0.8	-0.2	1	-1.4	3.3	218	-0.3	-0.3	-0.4	-1.9	0.9	-1.9	0.9
219	59.3	57.9	56.4	55.9	55.8	59.3	219	58	60.5	55.3	57.4	53.5	60.5	219	57.5	60.9	55.2	54.7	56.2	60.9	219	-1.3	2.6	-1.1	1.5	-2.3	-2.3	2.6	219	-1.8	3	-1.2	-1.2	0.4	-1.8	3	219	-0.5	0.4	-0.1	-2.7	2.7	-2.7	2.7
220	65	64.9	63	64.5	72.4	72.4	220	63.6	64.2	62.3	64.9	71.5	71.5	220	63.7	63.9	62.7	63.9	70.1	70.1	220	-1.4	-0.7	-0.7	0.4	-0.9	-1.4	0.4	220	-1.3	-1	-0.3	-0.6	-2.3	-2.3	-0.3	220	0.1	-0.3	0.4	-1	-1.4	-1.4	0.4
221	65	64.9	63	64.5	72.4	72.4	221	63.6	64.2	62.3	64.9	71.5	71.5	221	63.7	63.9	62.7	63.9	70.1	70.1	221	-1.4	-0.7	-0.7	0.4	-0.9	-1.4	0.4	221	-1.3	-1	-0.3	-0.6	-2.3	-2.3	-0.3	221	0.1	-0.3	0.4	-1	-1.4	-1.4	0.4
222	39.4	41.2	43.6	54.8	62.6	62.6	222	47.4	50.5	53.9	62.3	64.7	64.7	222	48.3	51.5	54.4	62.5	65.4	65.4	222	8	9.3	10.3	7.5	2.1	2.1	10.3	222	8.9	10.3	10.8	7.7	2.8	2.8	10.8	222	0.9	1	0.5	0.2	0.7	0.2	1
223	39.4	41.2	43.6	54.8	62.6	62.6	223	47.4	50.5	53.9	62.3	64.7	64.7	223	48.3	51.5	54.4	62.5	65.4	65.4	223	8	9.3	10.3	7.5	2.1	2.1	10.3	223	8.9	10.3	10.8	7.7	2.8	2.8	10.8	223	0.9	1	0.5	0.2	0.7	0.2	1
224	29.7	30.3	34.5	45.7	50.1	50.1	224	37.1	40.7	44.7	55.1	54.3	55.1	224	38	43	45.5	53.6	56.1	56.1	224	7.4	10.4	10.2	9.4	4.2	4.2	10.4	224	8.3	12.7	11	7.9	6	6	12.7	224	0.9	2.3	0.8	-1.5	1.8	-1.5	2.3
225	29.7	30.3	34.5	45.7	50.1	50.1	225	37.1	40.7	44.7	55.1	54.3	55.1	225	38	43	45.5	53.6	56.1	56.1	225	7.4	10.4	10.2	9.4	4.2	4.2	10.4	225	8.3	12.7	11	7.9	6	6	12.7	225	0.9	2.3	0.8	-1.5	1.8	-1.5	2.3
226	29.7	30.3	34.5	45.7	50.1	50.1	226	37.1	40.7	44.7	55.1	54.3	55.1	226	38	43	45.5	53.6	56.1	56.1	226	7.4	10.4	10.2	9.4	4.2	4.2	10.4	226	8.3	12.7	11	7.9	6	6	12.7	226	0.9	2.3	0.8	-1.5	1.8	-1.5	2.3
227	29.7	30.3	34.5	45.7	50.1	50.1	227	37.1	40.7	44.7	55.1	54.3	55.1	227	38	43	45.5	53.6	56.1	56.1	227	7.4	10.4	10.2	9.4	4.2	4.2	10.4	227	8.3	12.7	11	7.9	6	6	12.7	227	0.9	2.3	0.8	-1.5	1.8	-1.5	2.3
228	29.7	30.3	34.5	45.7	50.1	50.1	228	37.1	40.7	44.7	55.1	54.3	55.1	228	38	43	45.5	53.6	56.1	56.1	228	7.4	10.4	10.2	9.4	4.2	4.2	10.4	228	8.3	12.7	11	7.9	6	6	12.7	228	0.9	2.3	0.8	-1.5	1.8	-1.5	2.3
229	29.7	30.3	34.5	45.7	50.1	50.1	229	37.1	40.7	44.7	55.1	54.3	55.1	229	38	43	45.5	53.6	56.1	56.1	229	7.4	10.4	10.2	9.4	4.2	4.2	10.4	229	8.3	12.7	11	7.9	6	6	12.7	229	0.9	2.3	0.8	-1.5	1.8	-1.5	2.3
230	29.7	30.3	34.5	45.7	50.1	50.1	230	37.1	40.7	44.7	55.1	54.3	55.1	230	38	43	45.5	53.6	56.1	56.1	230	7.4	10.4	10.2	9.4	4.2	4.2	10.4	230	8.3	12.7	11	7.9	6	6	12.7	230	0.9	2.3	0.8	-1.5	1.8	-1.5	2.3
231	29.7	30.3	34.5	45.7	50.1	50.1	231	37.1	40.7	44.7	55.1	54.3	55.1	231	38	43	45.5	53.6	56.1	56.1	231	7.4	10.4	10.2	9.4	4.2	4.2	10.4	231	8.3	12.7	11	7.9	6	6	12.7	231	0.9	2.3	0.8	-1.5	1.8	-1.5	2.3
232	29.7	30.3	34.5	45.7	50.1	50.1	232	37.1	40.7	44.7	55.1	54.3	55.1	232	38	43	45.5	53.6	56.1	56.1	232	7.4	10.4	10.2	9.4	4.2	4.2	10.4	232	8.3	12.7	11	7.9	6	6	12.7	232	0.9	2.3	0.8	-1.5	1.8	-1.5	2.3
233	29.7	30.3	34.5	45.7	50.1	50.1	233	37.1	40.7	44.7	55.1	54.3	55.1	233	38	43	45.5	53.6	56.1	56.1	233	7.4	10.4	10.2	9.4	4.2	4.2	10.4	233	8.3	12.7	11	7.9	6	6	12.7	233	0.9	2.3	0.8	-1.5	1.8	-1.5	2.3
234	29.7	30.3	34.5	45.7	50.1	50.1	234	37.1	40.7	44.7	55.1	54.3	55.1	234	38	43	45.5	53.6	56.1	56.1	234	7.4	10.4	10.2	9.4	4.2	4.2	10.4	234	8.3	12.7	11	7.9	6	6	12.7	234	0.9	2.3	0.8	-1.5	1.8	-1.5	2.3
235	32.4	34.3	37.5	50.7	56.6	56.6	235	42	45.7	49.5	57.7	59	59	235	43.3	47.4	51	57.9	60.4	60.4	235	9.6	11.4	12	7	2.4	2.4	12	235	10.9	13.1	13.5	7.2	3.8	3.8	13.5	235	1.3	1.7	1.5	0.2	1.4	0.2	1.7
236	32.4	34.3	37.5	50.7	56.6	56.6	236	42	45.7	49.5	57.7	59	59	236	43.3	47.4	51	57.9	60.4	60.4	236	9.6	11.4	12	7	2.4	2.4	12	236	10.9	13.1	13.5	7.2	3.8	3.8	13.5	236	1.3	1.7	1.5	0.2	1.4	0.2	1.7
237	36.6	38	41.5	53.3	58.3	58.3	237	46.1	49.4	52.5	60	61.5	61.5	237	47.4	50.6	53.1	60.2	62.1	62.1	237	9.5	11.4	11	6.7	3.2	3.2	11.4	237	10.8	12.6	11.6	6.9	3.8	3.8	12.6	237	1.3	1.2	0.6	0.2	0.6	0.2	1.3
238	12.6	13.7	13.4	17.2	25	25	238	15.7	15.2	19	23.7	31.1	31.1	238	15.7	15.9	19.4	24	32.6	32.6	238	3.1	1.5	5.6	6.5	6.1	1.5	6.5	238	3.1	2.2	6	6.8	7.6	2.2	7.6	238	0	0.7	0.4	0.3	1.5	0	1.5
239	15.7	15.8	16	20.6	28.8	28.8	239	17.1	18.4	21.1	26.4	29.9	29.9	239	17.3	18.6	21.9	25.9	30.1	30.1	239	1.4	2.6	5.1	5.8	1.1	1.1	5.8	239	1.6	2.8	5.9	5.3	1.3	1.3	5.9	239	0.2	0.2	0.8	-0.5	0.2	-0.5	0.8
240	2	3.6	3.6	7.8	16.4	16.4	240	4.2	2.8	8.4	11.1	16.7	16.7	240	5.6	4.4	9.7	11.9	16.9	16.9	240	2.2	-0.8	4.8	3.3	0.3	-0.8	4.8	240	3.6	0.8	6.1	4.1	0.5	0.5	6.1	240	1.4	1.6	1.3	0.8	0.2	0.2	1.6
241	2	3.6	3.6	7.8	16.4	16.4	241	4.2	2.8	8.4	11.1	16.7	16.7	241	5.6	4.4	9.7	11.9	16.9	16.9	241	2.2	-0.8	4.8	3.3	0.3	-0.8	4.8	241	3.6	0.8	6.1	4.1	0.5	0.5	6.1	241	1.4	1.6	1.3	0.8	0.2	0.2	1.6
242	2	3.6	3.6	7.8	16.4	16.4	242	4.2	2.8	8.4	11.1	16.7	16.7	242	5.6	4.4	9.7	11.9	16.9	16.9	242	2.2	-0.8	4.8	3.3	0.3	-0.8	4.8	242	3.6	0.8	6.1	4.1	0.5	0.5	6.1	242	1.4	1.6	1.3	0.8	0.2	0.2	1.6
243	2	3.6	3.6	7.8	16.4	16.4	243	4.2	2.8	8.4	11.1	16.7	16.7	243	5.6	4.4	9.7	11.9	16.9	16.9	243	2.2	-0.8	4.8	3.3	0.3	-0.8	4.8	243	3.6	0.8	6.1	4.1	0.5	0.5	6.1	243	1.4	1.6	1.3	0.8	0.2	0.2	1.6
244	2	3.6	3.6	7.8	16.4	16.4	244	4.2	2.8	8.4	11.1	16.7	16.7	244	5.6	4.4	9.7	11.9	16.9	16.9	244	2.2	-0.8	4.8	3.3	0.3	-0.8	4.8	244	3.6	0.8	6.1	4.1	0.5	0.5	6.1	244	1.4	1.6	1.3	0.8	0.2	0.2	1.6
245	2.8	4	9.2	21	43.2	43.2	245	2.6	4.3	9.6	20.9	43.7	43.7	245	2.2	3.6	6	18	37.3	37.3	245	-0.2	0.3	0.4	-0.1	0.5	-0.2	0.5	245	-0.6	-0.4	-3.2	-3	-5.9	-5.9	-0.4	245	-0.4	-0.7	-3.6	-2.9	-6.4	-6.4	-0.4
246	3.3	4.8	10.8	20.8	36.2	36.2	246	2.9	4.7	10	20.3	35.3	35.3	246	2.5	3.3	6.1	18.4	30.6	30.6	246	-0.4	-0.1	-0.8	-0.5	-0.9	-0.9	-0.1	246	-0.8	-1.5	-4.7	-2.4	-5.6	-5.6	-0.8	246	-0.4	-1.4	-3.9	-1.9	-4.7	-4.7	-0.4
247	3.3	4.8	10.8	20.8	36.2	36.2	247	2.9	4.7	10	20.3	35.3	35.3	247	2.5	3.3	6.1	18.4	30.6	30.6	247	-0.4	-0.1	-0.8	-0.5	-0.9	-0.9	-0.1	247	-0.8	-1.5	-4.7	-2.4	-5.6	-5.6	-0.8	247	-0.4	-1.4	-3.9	-1.9	-4.7	-4.7	-0.4
248	3.3	4.8	10.8	20.8	36.2	36.2	248	2.9	4.7	10	20.3	35.3	35.3	248	2.5	3.3	6.1	18.4	30.6	30.6	248	-0.4	-0.1	-0.8	-0.5	-0.9	-0.9	-0.1	248	-0.8	-1.5	-4.7	-2.4	-5.6	-5.6	-0.8	248	-0.4	-1.4	-3.9	-1.9	-4.7	-4.7	-0.4
249	3.3	4.8	10.8	20.8	36.2	36.2	249	2.9	4.7	10	20.3	35.3	35.3	249	2.5	3.3	6.1	18.4	30.6	30.6	249	-0.4	-0.1	-0.8	-0.5	-0.9	-0.9	-0.1	249	-0.8	-1.5	-4.7	-2.4	-5.6	-5.6	-0.8	249	-0.4	-1.4	-3.9	-1.9	-4.7	-4.7	-0.4
250	3.3	4.8	10.8	20.8	36.2	36.2	250	2.9	4.7	10	20.3	35.3	35.3	250	2.5	3.3	6.1	18.4	30.6	30.6	250	-0.4	-0.1	-0.8	-0.5	-0.9	-0.9	-0.1	250	-0.8	-1.5	-4.7	-2.4	-5.6	-5.6	-0.8	250	-0.4	-1.4	-3.9	-1.9	-4.7	-4.7	-0.4
251	3.3	4.8	10.8	20.8	36.2	36.2	251	2.9	4.7	10	20.3	35.3	35.3	251	2.5	3.3	6.1	18.4	30.6	30.6	251	-0.4	-0.1	-0.8	-0.5	-0.9	-0.9	-0.1	251	-0.8	-1.5	-4.7	-2.4	-5.6	-5.6	-0.8	251	-0.4	-1.4	-3.9	-1.9	-4.7	-4.7	-0.4
252	19.2	19.6	21.9	30.4	51.4	51.4	252	18.5	19.4	21.9	30.9	53.6	53.6	252	17.9	17.5	19.4	29.2	51	51	252	-0.7	-0.2	0	0.5	2.2	-0.7	2.2	252	-1.3	-2.1	-2.5	-1.2	-0.4	-2.5	-0.4	252	-0.6	-1.9	-2.5	-1.7	-2.6	-2.6	-0.6
253	10.8	11	11.1	16.6	37.6	37.6	253	10.7	9.4	11.2	16.9	39.9	39.9	253	10.5	9.2	11	16.9	40.7	40.7	253	-0.1	-1.6	0.1	0.3	2.3	-1.6	2.3	253	-0.3	-1.8	-0.1	0.3	3.1	-1.8	3.1	253	-0.2	-0.2	-0.2	0	0.8	-0.2	0.8
254	10.8	11	11.1	16.6	37.6	37.6	254	10.7	9.4	11.2	16.9	39.9	39.9	254	10.5	9.2	11	16.9	40.7	40.7	254	-0.1	-1.6	0.1	0.3	2.3	-1.6	2.3	254	-0.3	-1.8	-0.1	0.3	3.1	-1.8	3.1	254	-0.2	-0.2	-0.2	0	0.8	-0.2	0.8
255	10.8	11	11.1	16.6	37.6	37.6	255	10.7	9.4	11.2	16.9	39.9	39.9	255	10.5	9.2	11	16.9	40.7	40.7	255	-0.1	-1.6	0.1	0.3	2.3	-1.6	2.3	255	-0.3	-1.8	-0.1	0.3	3.1	-1.8	3.1	255	-0.2	-0.2	-0.2	0	0.8	-0.2	0.8
256	-0.4	-0.7	-0.5	4.7	20	20	256	0.6	1.1	1.2	7	20.8	20.8	256	1	0.7	1.5	6.4	21	21	256	1	1.8	1.7	2.3	0.8	0.8	2.3	256	1.4	1.4	2	1.7	1	1	2	256	0.4	-0.4	0.3	-0.6	0.2	-0.6	0.4
257	-0.4	-0.7	-0.5	4.7	20	20	257	0.6	1.1	1.2	7	20.8	20.8	257	1	0.7	1.5	6.4	21	21	257	1	1.8	1.7	2.3	0.8	0.8	2.3	257	1.4	1.4	2	1.7	1	1	2	257	0.4	-0.4	0.3	-0.6	0.2	-0.6	0.4
258	-0.4	-0.7	-0.5	4.7	20	20	258	0.6	1.1	1.2	7	20.8	20.8	258	1	0.7	1.5	6.4	21	21	258	1	1.8	1.7	2.3	0.8	0.8	2.3	258	1.4	1.4	2	1.7	1	1	2	258	0.4	-0.4	0.3	-0.6	0.2	-0.6	0.4
259	-0.4	-0.7	-0.5	4.7	20	20	259	0.6	1.1	1.2	7	20.8	20.8	259	1	0.7	1.5	6.4	21	21	259	1	1.8	1.7	2.3	0.8	0.8	2.3	259	1.4	1.4	2	1.7	1	1	2	259	0.4	-0.4	0.3	-0.6	0.2	-0.6	0.4
260	0.7	0.5	1	4.9	16	16	260	1.4	1.6	2.2	6.9	23.3	23.3	260	2	1.9	2.3	7.1	25	25	260	0.7	1.1	1.2	2	7.3	0.7	7.3	260	1.3	1.4	1.3	2.2	9	1.3	9	260	0.6	0.3	0.1	0.2	1.7	0.1	1.7
261	0.7	0.5	1	4.9	16	16	261	1.4	1.6	2.2	6.9	23.3	23.3	261	2	1.9	2.3	7.1	25	25	261	0.7	1.1	1.2	2	7.3	0.7	7.3	261	1.3	1.4	1.3	2.2	9	1.3	9	261	0.6	0.3	0.1	0.2	1.7	0.1	1.7
262	27	26.6	27.8	37.5	41.1	41.1	262	32.4	35.1	35.3	43.7	48.2	48.2	262	33.6	36.6	35.2	43.7	52.1	52.1	262	5.4	8.5	7.5	6.2	7.1	5.4	8.5	262	6.6	10	7.4	6.2	11	6.2	11	262	1.2	1.5	-0.1	0	3.9	-0.1	3.9
263	27	26.6	27.8	37.5	41.1	41.1	263	32.4	35.1	35.3	43.7	48.2	48.2	263	33.6	36.6	35.2	43.7	52.1	52.1	263	5.4	8.5	7.5	6.2	7.1	5.4	8.5	263	6.6	10	7.4	6.2	11	6.2	11	263	1.2	1.5	-0.1	0	3.9	-0.1	3.9
264	27	26.6	27.8	37.5	41.1	41.1	264	32.4	35.1	35.3	43.7	48.2	48.2	264	33.6	36.6	35.2	43.7	52.1	52.1	264	5.4	8.5	7.5	6.2	7.1	5.4	8.5	264	6.6	10	7.4	6.2	11	6.2	11	264	1.2	1.5	-0.1	0	3.9	-0.1	3.9
265	27	26.6	27.8	37.5	41.1	41.1	265	32.4	35.1	35.3	43.7	48.2	48.2	265	33.6	36.6	35.2	43.7	52.1	52.1	265	5.4	8.5	7.5	6.2	7.1	5.4	8.5	265	6.6	10	7.4	6.2	11	6.2	11	265	1.2	1.5	-0.1	0	3.9	-0.1	3.9
266	27	26.6	27.8	37.5	41.1	41.1	266	32.4	35.1	35.3	43.7	48.2	48.2	266	33.6	36.6	35.2	43.7	52.1	52.1	266	5.4	8.5	7.5	6.2	7.1	5.4	8.5	266	6.6	10	7.4	6.2	11	6.2	11	266	1.2	1.5	-0.1	0	3.9	-0.1	3.9
267	27	26.6	27.8	37.5	41.1	41.1	267	32.4	35.1	35.3	43.7	48.2	48.2	267	33.6	36.6	35.2	43.7	52.1	52.1	267	5.4	8.5	7.5	6.2	7.1	5.4	8.5	267	6.6	10	7.4	6.2	11	6.2	11	267	1.2	1.5	-0.1	0	3.9	-0.1	3.9
268	27	26.6	27.8	37.5	41.1	41.1	268	32.4	35.1	35.3	43.7	48.2	48.2	268	33.6	36.6	35.2	43.7	52.1	52.1	268	5.4	8.5	7.5	6.2	7.1	5.4	8.5	268	6.6	10	7.4	6.2	11	6.2	11	268	1.2	1.5	-0.1	0	3.9	-0.1	3.9
269	42.3	44.1	47.2	53.5	54.8	54.8	269	48.3	50.5	51.3	56	57	57	269	49.7	51	51.7	56.9	58	58	269	6	6.4	4.1	2.5	2.2	2.2	6.4	269	7.4	6.9	4.5	3.4	3.2	3.2	7.4	269	1.4	0.5	0.4	0.9	1	0.4	1.4
270	42.3	44.1	47.2	53.5	54.8	54.8	270	48.3	50.5	51.3	56	57	57	270	49.7	51	51.7	56.9	58	58	270	6	6.4	4.1	2.5	2.2	2.2	6.4	270	7.4	6.9	4.5	3.4	3.2	3.2	7.4	270	1.4	0.5	0.4	0.9	1	0.4	1.4
271	42.3	44.1	47.2	53.5	54.8	54.8	271	48.3	50.5	51.3	56	57	57	271	49.7	51	51.7	56.9	58	58	271	6	6.4	4.1	2.5	2.2	2.2	6.4	271	7.4	6.9	4.5	3.4	3.2	3.2	7.4	271	1.4	0.5	0.4	0.9	1	0.4	1.4
272	42.3	44.1	47.2	53.5	54.8	54.8	272	48.3	50.5	51.3	56	57	57	272	49.7	51	51.7	56.9	58	58	272	6	6.4	4.1	2.5	2.2	2.2	6.4	272	7.4	6.9	4.5	3.4	3.2	3.2	7.4	272	1.4	0.5	0.4	0.9	1	0.4	1.4
273	42.4	43	46.6	56.2	59.2	59.2	273	48.7	50.5	52.3	59	61.5	61.5	273	49.5	51.7	53.4	59.7	63.4	63.4	273	6.3	7.5	5.7	2.8	2.3	2.3	7.5	273	7.1	8.7	6.8	3.5	4.2	3.5	8.7	273	0.8	1.2	1.1	0.7	1.9	0.7	1.9
274	18.1	17.5	16.7	18.5	29.8	29.8	274	15.8	16	15.8	18.4	31.4	31.4	274	15	15.2	15.2	17.4	28.3	28.3	274	-2.3	-1.5	-0.9	-0.1	1.6	-2.3	1.6	274	-3.1	-2.3	-1.5	-1.1	-1.5	-3.1	-1.1	274	-0.8	-0.8	-0.6	-1	-3.1	-3.1	-0.6
275	18.1	17.5	16.7	18.5	29.8	29.8	275	15.8	16	15.8	18.4	31.4	31.4	275	15	15.2	15.2	17.4	28.3	28.3	275	-2.3	-1.5	-0.9	-0.1	1.6	-2.3	1.6	275	-3.1	-2.3	-1.5	-1.1	-1.5	-3.1	-1.1	275	-0.8	-0.8	-0.6	-1	-3.1	-3.1	-0.6
276	18.1	17.5	16.7	18.5	29.8	29.8	276	15.8	16	15.8	18.4	31.4	31.4	276	15	15.2	15.2	17.4	28.3	28.3	276	-2.3	-1.5	-0.9	-0.1	1.6	-2.3	1.6	276	-3.1	-2.3	-1.5	-1.1	-1.5	-3.1	-1.1	276	-0.8	-0.8	-0.6	-1	-3.1	-3.1	-0.6
277	18.1	17.5	16.7	18.5	29.8	29.8	277	15.8	16	15.8	18.4	31.4	31.4	277	15	15.2	15.2	17.4	28.3	28.3	277	-2.3	-1.5	-0.9	-0.1	1.6	-2.3	1.6	277	-3.1	-2.3	-1.5	-1.1	-1.5	-3.1	-1.1	277	-0.8	-0.8	-0.6	-1	-3.1	-3.1	-0.6
278	26.7	26.7	26.3	27.2	35.9	35.9	278	25.7	25.8	25	26.7	37.3	37.3	278	25.6	25.5	25	26.6	38	38	278	-1	-0.9	-1.3	-0.5	1.4	-1.3	1.4	278	-1.1	-1.2	-1.3	-0.6	2.1	-1.3	2.1	278	-0.1	-0.3	0	-0.1	0.7	-0.3	0.7
279							279							279							279								279								279
280	48.7	53	56.5	60.5	59.8	60.5	280	48.1	53.4	56.6	60.8	59.4	60.8	280	33.8	38.9	44.3	56.6	60.4	60.4	280	-0.6	0.4	0.1	0.3	-0.4	-0.6	0.4	280	-14.9	-14.1	-12.2	-3.9	0.6	-14.9	0.6	280	-14.3	-14.5	-12.3	-4.2	1	-14.5	1
281	48.7	53	56.5	60.5	59.8	60.5	281	48.1	53.4	56.6	60.8	59.4	60.8	281	33.8	38.9	44.3	56.6	60.4	60.4	281	-0.6	0.4	0.1	0.3	-0.4	-0.6	0.4	281	-14.9	-14.1	-12.2	-3.9	0.6	-14.9	0.6	281	-14.3	-14.5	-12.3	-4.2	1	-14.5	1
282	48.7	53	56.5	60.5	59.8	60.5	282	48.1	53.4	56.6	60.8	59.4	60.8	282	33.8	38.9	44.3	56.6	60.4	60.4	282	-0.6	0.4	0.1	0.3	-0.4	-0.6	0.4	282	-14.9	-14.1	-12.2	-3.9	0.6	-14.9	0.6	282	-14.3	-14.5	-12.3	-4.2	1	-14.5	1
283	48.7	53	56.5	60.5	59.8	60.5	283	48.1	53.4	56.6	60.8	59.4	60.8	283	33.8	38.9	44.3	56.6	60.4	60.4	283	-0.6	0.4	0.1	0.3	-0.4	-0.6	0.4	283	-14.9	-14.1	-12.2	-3.9	0.6	-14.9	0.6	283	-14.3	-14.5	-12.3	-4.2	1	-14.5	1
284	48.7	53	56.5	60.5	59.8	60.5	284	48.1	53.4	56.6	60.8	59.4	60.8	284	33.8	38.9	44.3	56.6	60.4	60.4	284	-0.6	0.4	0.1	0.3	-0.4	-0.6	0.4	284	-14.9	-14.1	-12.2	-3.9	0.6	-14.9	0.6	284	-14.3	-14.5	-12.3	-4.2	1	-14.5	1
285	48.7	53	56.5	60.5	59.8	60.5	285	48.1	53.4	56.6	60.8	59.4	60.8	285	33.8	38.9	44.3	56.6	60.4	60.4	285	-0.6	0.4	0.1	0.3	-0.4	-0.6	0.4	285	-14.9	-14.1	-12.2	-3.9	0.6	-14.9	0.6	285	-14.3	-14.5	-12.3	-4.2	1	-14.5	1
286	48.7	53	56.5	60.5	59.8	60.5	286	48.1	53.4	56.6	60.8	59.4	60.8	286	33.8	38.9	44.3	56.6	60.4	60.4	286	-0.6	0.4	0.1	0.3	-0.4	-0.6	0.4	286	-14.9	-14.1	-12.2	-3.9	0.6	-14.9	0.6	286	-14.3	-14.5	-12.3	-4.2	1	-14.5	1
287	48.7	53	56.5	60.5	59.8	60.5	287	48.1	53.4	56.6	60.8	59.4	60.8	287	33.8	38.9	44.3	56.6	60.4	60.4	287	-0.6	0.4	0.1	0.3	-0.4	-0.6	0.4	287	-14.9	-14.1	-12.2	-3.9	0.6	-14.9	0.6	287	-14.3	-14.5	-12.3	-4.2	1	-14.5	1
288	48.7	53	56.5	60.5	59.8	60.5	288	48.1	53.4	56.6	60.8	59.4	60.8	288	33.8	38.9	44.3	56.6	60.4	60.4	288	-0.6	0.4	0.1	0.3	-0.4	-0.6	0.4	288	-14.9	-14.1	-12.2	-3.9	0.6	-14.9	0.6	288	-14.3	-14.5	-12.3	-4.2	1	-14.5	1
289	28	32	37.8	46.4	46	46.4	289	26.7	31.1	37.3	45.7	44.7	45.7	289	19.1	21.5	27	41.5	45.4	45.4	289	-1.3	-0.9	-0.5	-0.7	-1.3	-1.3	-0.5	289	-8.9	-10.5	-10.8	-4.9	-0.6	-10.8	-0.6	289	-7.6	-9.6	-10.3	-4.2	0.7	-10.3	0.7
290	32.8	36.4	42.5	53.3	53.1	53.3	290	30.3	34.6	40.7	51.5	50.5	51.5	290	23.6	25.9	31.4	47.7	51	51	290	-2.5	-1.8	-1.8	-1.8	-2.6	-2.6	-1.8	290	-9.2	-10.5	-11.1	-5.6	-2.1	-11.1	-2.1	290	-6.7	-8.7	-9.3	-3.8	0.5	-9.3	0.5
291	32.8	36.4	42.5	53.3	53.1	53.3	291	30.3	34.6	40.7	51.5	50.5	51.5	291	23.6	25.9	31.4	47.7	51	51	291	-2.5	-1.8	-1.8	-1.8	-2.6	-2.6	-1.8	291	-9.2	-10.5	-11.1	-5.6	-2.1	-11.1	-2.1	291	-6.7	-8.7	-9.3	-3.8	0.5	-9.3	0.5
292	32.8	36.4	42.5	53.3	53.1	53.3	292	30.3	34.6	40.7	51.5	50.5	51.5	292	23.6	25.9	31.4	47.7	51	51	292	-2.5	-1.8	-1.8	-1.8	-2.6	-2.6	-1.8	292	-9.2	-10.5	-11.1	-5.6	-2.1	-11.1	-2.1	292	-6.7	-8.7	-9.3	-3.8	0.5	-9.3	0.5
293	32.8	36.4	42.5	53.3	53.1	53.3	293	30.3	34.6	40.7	51.5	50.5	51.5	293	23.6	25.9	31.4	47.7	51	51	293	-2.5	-1.8	-1.8	-1.8	-2.6	-2.6	-1.8	293	-9.2	-10.5	-11.1	-5.6	-2.1	-11.1	-2.1	293	-6.7	-8.7	-9.3	-3.8	0.5	-9.3	0.5
294	32.8	36.4	42.5	53.3	53.1	53.3	294	30.3	34.6	40.7	51.5	50.5	51.5	294	23.6	25.9	31.4	47.7	51	51	294	-2.5	-1.8	-1.8	-1.8	-2.6	-2.6	-1.8	294	-9.2	-10.5	-11.1	-5.6	-2.1	-11.1	-2.1	294	-6.7	-8.7	-9.3	-3.8	0.5	-9.3	0.5
295	3.4	6	11.8	21.5	37.5	37.5	295	5.9	8.4	18.1	35.2	46.3	46.3	295	5.9	7.1	15.6	27.6	41.7	41.7	295	2.5	2.4	6.3	13.7	8.8	2.4	13.7	295	2.5	1.1	3.8	6.1	4.2	1.1	6.1	295	0	-1.3	-2.5	-7.6	-4.6	-7.6	0
296	3.4	6	11.8	21.5	37.5	37.5	296	5.9	8.4	18.1	35.2	46.3	46.3	296	5.9	7.1	15.6	27.6	41.7	41.7	296	2.5	2.4	6.3	13.7	8.8	2.4	13.7	296	2.5	1.1	3.8	6.1	4.2	1.1	6.1	296	0	-1.3	-2.5	-7.6	-4.6	-7.6	0
297	0.2	-0.1	0.6	6.9	23.8	23.8	297	2.8	4.1	7.6	22	35.4	35.4	297	1.3	2	3.6	15.4	31.3	31.3	297	2.6	4.2	7	15.1	11.6	2.6	15.1	297	1.1	2.1	3	8.5	7.5	1.1	8.5	297	-1.5	-2.1	-4	-6.6	-4.1	-6.6	-1.5
298	0.2	-0.1	0.6	6.9	23.8	23.8	298	2.8	4.1	7.6	22	35.4	35.4	298	1.3	2	3.6	15.4	31.3	31.3	298	2.6	4.2	7	15.1	11.6	2.6	15.1	298	1.1	2.1	3	8.5	7.5	1.1	8.5	298	-1.5	-2.1	-4	-6.6	-4.1	-6.6	-1.5
299	0.2	-0.1	0.6	6.9	23.8	23.8	299	2.8	4.1	7.6	22	35.4	35.4	299	1.3	2	3.6	15.4	31.3	31.3	299	2.6	4.2	7	15.1	11.6	2.6	15.1	299	1.1	2.1	3	8.5	7.5	1.1	8.5	299	-1.5	-2.1	-4	-6.6	-4.1	-6.6	-1.5
300	2.6	0.1	3.1	3.1	6.2	6.2	300	7.3	8.4	11.2	23.7	32.3	32.3	300	5	5.1	6.2	11.9	28.9	28.9	300	4.7	8.3	8.1	20.6	26.1	4.7	26.1	300	2.4	5	3.1	8.8	22.7	2.4	22.7	300	-2.3	-3.3	-5	-11.8	-3.4	-11.8	-2.3
301	2.6	0.1	3.1	3.1	6.2	6.2	301	7.3	8.4	11.2	23.7	32.3	32.3	301	5	5.1	6.2	11.9	28.9	28.9	301	4.7	8.3	8.1	20.6	26.1	4.7	26.1	301	2.4	5	3.1	8.8	22.7	2.4	22.7	301	-2.3	-3.3	-5	-11.8	-3.4	-11.8	-2.3
302	2.6	0.1	3.1	3.1	6.2	6.2	302	7.3	8.4	11.2	23.7	32.3	32.3	302	5	5.1	6.2	11.9	28.9	28.9	302	4.7	8.3	8.1	20.6	26.1	4.7	26.1	302	2.4	5	3.1	8.8	22.7	2.4	22.7	302	-2.3	-3.3	-5	-11.8	-3.4	-11.8	-2.3
303	2.3	2.1	2.1	2.3	4.2	4.2	303	3.4	4	5.8	17	34.9	34.9	303	2.7	2.9	3.4	8.6	26.7	26.7	303	1.1	1.9	3.7	14.7	30.7	1.1	30.7	303	0.4	0.8	1.3	6.3	22.5	0.4	22.5	303	-0.7	-1.1	-2.4	-8.4	-8.2	-8.4	-0.7
304	1.3	0.6	0.2	-0.6	4.7	4.7	304	2.4	3.5	4.6	19	33.7	33.7	304	1.5	0.8	2.6	8.1	28.5	28.5	304	1.1	2.9	4.4	19.6	29	1.1	29	304	0.2	0.2	2.4	8.7	23.8	0.2	23.8	304	-0.9	-2.7	-2	-10.9	-5.2	-10.9	-0.9
305	1.3	0.6	0.2	-0.6	4.7	4.7	305	2.4	3.5	4.6	19	33.7	33.7	305	1.5	0.8	2.6	8.1	28.5	28.5	305	1.1	2.9	4.4	19.6	29	1.1	29	305	0.2	0.2	2.4	8.7	23.8	0.2	23.8	305	-0.9	-2.7	-2	-10.9	-5.2	-10.9	-0.9
306	1.3	0.6	0.2	-0.6	4.7	4.7	306	2.4	3.5	4.6	19	33.7	33.7	306	1.5	0.8	2.6	8.1	28.5	28.5	306	1.1	2.9	4.4	19.6	29	1.1	29	306	0.2	0.2	2.4	8.7	23.8	0.2	23.8	306	-0.9	-2.7	-2	-10.9	-5.2	-10.9	-0.9
307	21.6	22.1	23.2	26.1	41.8	41.8	307	27.7	32.6	35.8	40.5	45.6	45.6	307	21.3	29.3	35.2	37.4	41.4	41.4	307	6.1	10.5	12.6	14.4	3.8	3.8	14.4	307	-0.3	7.2	12	11.3	-0.4	-0.4	12	307	-6.4	-3.3	-0.6	-3.1	-4.2	-6.4	-0.6
308	21.6	22.1	23.2	26.1	41.8	41.8	308	27.7	32.6	35.8	40.5	45.6	45.6	308	21.3	29.3	35.2	37.4	41.4	41.4	308	6.1	10.5	12.6	14.4	3.8	3.8	14.4	308	-0.3	7.2	12	11.3	-0.4	-0.4	12	308	-6.4	-3.3	-0.6	-3.1	-4.2	-6.4	-0.6
309	21.6	22.1	23.2	26.1	41.8	41.8	309	27.7	32.6	35.8	40.5	45.6	45.6	309	21.3	29.3	35.2	37.4	41.4	41.4	309	6.1	10.5	12.6	14.4	3.8	3.8	14.4	309	-0.3	7.2	12	11.3	-0.4	-0.4	12	309	-6.4	-3.3	-0.6	-3.1	-4.2	-6.4	-0.6
310	45.6	53.9	57	57.1	56.5	57.1	310	52.1	55.1	55.2	55.4	54	55.4	310	52.6	55.8	57	57.1	56.1	57.1	310	6.5	1.2	-1.8	-1.7	-2.5	-2.5	6.5	310	7	1.9	0	0	-0.4	-0.4	7	310	0.5	0.7	1.8	1.7	2.1	0.5	2.1
311	45.6	53.9	57	57.1	56.5	57.1	311	52.1	55.1	55.2	55.4	54	55.4	311	52.6	55.8	57	57.1	56.1	57.1	311	6.5	1.2	-1.8	-1.7	-2.5	-2.5	6.5	311	7	1.9	0	0	-0.4	-0.4	7	311	0.5	0.7	1.8	1.7	2.1	0.5	2.1
312	45.6	53.9	57	57.1	56.5	57.1	312	52.1	55.1	55.2	55.4	54	55.4	312	52.6	55.8	57	57.1	56.1	57.1	312	6.5	1.2	-1.8	-1.7	-2.5	-2.5	6.5	312	7	1.9	0	0	-0.4	-0.4	7	312	0.5	0.7	1.8	1.7	2.1	0.5	2.1
313	45.6	53.9	57	57.1	56.5	57.1	313	52.1	55.1	55.2	55.4	54	55.4	313	52.6	55.8	57	57.1	56.1	57.1	313	6.5	1.2	-1.8	-1.7	-2.5	-2.5	6.5	313	7	1.9	0	0	-0.4	-0.4	7	313	0.5	0.7	1.8	1.7	2.1	0.5	2.1
314	54.6	56.4	57.1	58.4	62.6	62.6	314	59.4	64.7	61.2	64.8	64.3	64.8	314	56.9	64.1	61.9	63.6	65.5	65.5	314	4.8	8.3	4.1	6.4	1.7	1.7	8.3	314	2.3	7.7	4.8	5.2	2.9	2.3	7.7	314	-2.5	-0.6	0.7	-1.2	1.2	-2.5	1.2
315	50.1	50.7	49.1	48.2	47.6	50.7	315	48.5	48.9	47.5	47.4	46.5	48.9	315	49	48.9	47.8	47.7	47	49	315	-1.6	-1.8	-1.6	-0.8	-1.1	-1.8	-0.8	315	-1.1	-1.8	-1.3	-0.5	-0.6	-1.8	-0.5	315	0.5	0	0.3	0.3	0.5	0	0.5
316	50.1	50.7	49.1	48.2	47.6	50.7	316	48.5	48.9	47.5	47.4	46.5	48.9	316	49	48.9	47.8	47.7	47	49	316	-1.6	-1.8	-1.6	-0.8	-1.1	-1.8	-0.8	316	-1.1	-1.8	-1.3	-0.5	-0.6	-1.8	-0.5	316	0.5	0	0.3	0.3	0.5	0	0.5
317	50.1	50.7	49.1	48.2	47.6	50.7	317	48.5	48.9	47.5	47.4	46.5	48.9	317	49	48.9	47.8	47.7	47	49	317	-1.6	-1.8	-1.6	-0.8	-1.1	-1.8	-0.8	317	-1.1	-1.8	-1.3	-0.5	-0.6	-1.8	-0.5	317	0.5	0	0.3	0.3	0.5	0	0.5
318	50.1	50.7	49.1	48.2	47.6	50.7	318	48.5	48.9	47.5	47.4	46.5	48.9	318	49	48.9	47.8	47.7	47	49	318	-1.6	-1.8	-1.6	-0.8	-1.1	-1.8	-0.8	318	-1.1	-1.8	-1.3	-0.5	-0.6	-1.8	-0.5	318	0.5	0	0.3	0.3	0.5	0	0.5
319	45.2	47.8	51.3	58.5	65.4	65.4	319	56	59.4	61	63.9	65.6	65.6	319	58.5	60.1	60.4	63.5	66	66	319	10.8	11.6	9.7	5.4	0.2	0.2	11.6	319	13.3	12.3	9.1	5	0.6	0.6	13.3	319	2.5	0.7	-0.6	-0.4	0.4	-0.6	2.5
320	28.8	32.6	38	52.1	64.3	64.3	320	48.9	52.9	56.3	61.1	64	64	320	53.8	55.1	57.1	60.6	64.2	64.2	320	20.1	20.3	18.3	9	-0.3	-0.3	20.3	320	25	22.5	19.1	8.5	-0.1	-0.1	25	320	4.9	2.2	0.8	-0.5	0.2	-0.5	4.9
321	28.8	32.6	38	52.1	64.3	64.3	321	48.9	52.9	56.3	61.1	64	64	321	53.8	55.1	57.1	60.6	64.2	64.2	321	20.1	20.3	18.3	9	-0.3	-0.3	20.3	321	25	22.5	19.1	8.5	-0.1	-0.1	25	321	4.9	2.2	0.8	-0.5	0.2	-0.5	4.9
322	28.8	32.6	38	52.1	64.3	64.3	322	48.9	52.9	56.3	61.1	64	64	322	53.8	55.1	57.1	60.6	64.2	64.2	322	20.1	20.3	18.3	9	-0.3	-0.3	20.3	322	25	22.5	19.1	8.5	-0.1	-0.1	25	322	4.9	2.2	0.8	-0.5	0.2	-0.5	4.9
323	28.8	32.6	38	52.1	64.3	64.3	323	48.9	52.9	56.3	61.1	64	64	323	53.8	55.1	57.1	60.6	64.2	64.2	323	20.1	20.3	18.3	9	-0.3	-0.3	20.3	323	25	22.5	19.1	8.5	-0.1	-0.1	25	323	4.9	2.2	0.8	-0.5	0.2	-0.5	4.9
324	28.8	32.6	38	52.1	64.3	64.3	324	48.9	52.9	56.3	61.1	64	64	324	53.8	55.1	57.1	60.6	64.2	64.2	324	20.1	20.3	18.3	9	-0.3	-0.3	20.3	324	25	22.5	19.1	8.5	-0.1	-0.1	25	324	4.9	2.2	0.8	-0.5	0.2	-0.5	4.9
325	28.8	32.6	38	52.1	64.3	64.3	325	48.9	52.9	56.3	61.1	64	64	325	53.8	55.1	57.1	60.6	64.2	64.2	325	20.1	20.3	18.3	9	-0.3	-0.3	20.3	325	25	22.5	19.1	8.5	-0.1	-0.1	25	325	4.9	2.2	0.8	-0.5	0.2	-0.5	4.9
326	28.8	32.6	38	52.1	64.3	64.3	326	48.9	52.9	56.3	61.1	64	64	326	53.8	55.1	57.1	60.6	64.2	64.2	326	20.1	20.3	18.3	9	-0.3	-0.3	20.3	326	25	22.5	19.1	8.5	-0.1	-0.1	25	326	4.9	2.2	0.8	-0.5	0.2	-0.5	4.9
327	28.8	32.6	38	52.1	64.3	64.3	327	48.9	52.9	56.3	61.1	64	64	327	53.8	55.1	57.1	60.6	64.2	64.2	327	20.1	20.3	18.3	9	-0.3	-0.3	20.3	327	25	22.5	19.1	8.5	-0.1	-0.1	25	327	4.9	2.2	0.8	-0.5	0.2	-0.5	4.9
328	34.2	36.2	39.7	54.3	55.2	55.2	328	44	46.2	48.7	54.6	54.4	54.6	328	47.2	48.8	49.9	56.4	55.1	56.4	328	9.8	10	9	0.3	-0.8	-0.8	10	328	13	12.6	10.2	2.1	-0.1	-0.1	13	328	3.2	2.6	1.2	1.8	0.7	0.7	3.2
329	34.2	36.2	39.7	54.3	55.2	55.2	329	44	46.2	48.7	54.6	54.4	54.6	329	47.2	48.8	49.9	56.4	55.1	56.4	329	9.8	10	9	0.3	-0.8	-0.8	10	329	13	12.6	10.2	2.1	-0.1	-0.1	13	329	3.2	2.6	1.2	1.8	0.7	0.7	3.2
330	34.2	36.2	39.7	54.3	55.2	55.2	330	44	46.2	48.7	54.6	54.4	54.6	330	47.2	48.8	49.9	56.4	55.1	56.4	330	9.8	10	9	0.3	-0.8	-0.8	10	330	13	12.6	10.2	2.1	-0.1	-0.1	13	330	3.2	2.6	1.2	1.8	0.7	0.7	3.2
331	58.5	59.2	59.5	67.1	69.5	69.5	331	63.4	64.9	65.4	68.8	68.7	68.8	331	65.5	66.1	65.8	68.9	68.9	68.9	331	4.9	5.7	5.9	1.7	-0.8	-0.8	5.9	331	7	6.9	6.3	1.8	-0.6	-0.6	7	331	2.1	1.2	0.4	0.1	0.2	0.1	2.1
332	58.5	59.2	59.5	67.1	69.5	69.5	332	63.4	64.9	65.4	68.8	68.7	68.8	332	65.5	66.1	65.8	68.9	68.9	68.9	332	4.9	5.7	5.9	1.7	-0.8	-0.8	5.9	332	7	6.9	6.3	1.8	-0.6	-0.6	7	332	2.1	1.2	0.4	0.1	0.2	0.1	2.1
333	58.5	59.2	59.5	67.1	69.5	69.5	333	63.4	64.9	65.4	68.8	68.7	68.8	333	65.5	66.1	65.8	68.9	68.9	68.9	333	4.9	5.7	5.9	1.7	-0.8	-0.8	5.9	333	7	6.9	6.3	1.8	-0.6	-0.6	7	333	2.1	1.2	0.4	0.1	0.2	0.1	2.1
334	58.5	59.2	59.5	67.1	69.5	69.5	334	63.4	64.9	65.4	68.8	68.7	68.8	334	65.5	66.1	65.8	68.9	68.9	68.9	334	4.9	5.7	5.9	1.7	-0.8	-0.8	5.9	334	7	6.9	6.3	1.8	-0.6	-0.6	7	334	2.1	1.2	0.4	0.1	0.2	0.1	2.1
335	58.5	59.2	59.5	67.1	69.5	69.5	335	63.4	64.9	65.4	68.8	68.7	68.8	335	65.5	66.1	65.8	68.9	68.9	68.9	335	4.9	5.7	5.9	1.7	-0.8	-0.8	5.9	335	7	6.9	6.3	1.8	-0.6	-0.6	7	335	2.1	1.2	0.4	0.1	0.2	0.1	2.1
336	58.5	59.2	59.5	67.1	69.5	69.5	336	63.4	64.9	65.4	68.8	68.7	68.8	336	65.5	66.1	65.8	68.9	68.9	68.9	336	4.9	5.7	5.9	1.7	-0.8	-0.8	5.9	336	7	6.9	6.3	1.8	-0.6	-0.6	7	336	2.1	1.2	0.4	0.1	0.2	0.1	2.1
337	58.5	59.2	59.5	67.1	69.5	69.5	337	63.4	64.9	65.4	68.8	68.7	68.8	337	65.5	66.1	65.8	68.9	68.9	68.9	337	4.9	5.7	5.9	1.7	-0.8	-0.8	5.9	337	7	6.9	6.3	1.8	-0.6	-0.6	7	337	2.1	1.2	0.4	0.1	0.2	0.1	2.1
338	58.5	59.2	59.5	67.1	69.5	69.5	338	63.4	64.9	65.4	68.8	68.7	68.8	338	65.5	66.1	65.8	68.9	68.9	68.9	338	4.9	5.7	5.9	1.7	-0.8	-0.8	5.9	338	7	6.9	6.3	1.8	-0.6	-0.6	7	338	2.1	1.2	0.4	0.1	0.2	0.1	2.1
339	58.5	59.2	59.5	67.1	69.5	69.5	339	63.4	64.9	65.4	68.8	68.7	68.8	339	65.5	66.1	65.8	68.9	68.9	68.9	339	4.9	5.7	5.9	1.7	-0.8	-0.8	5.9	339	7	6.9	6.3	1.8	-0.6	-0.6	7	339	2.1	1.2	0.4	0.1	0.2	0.1	2.1
340	58.5	59.2	59.5	67.1	69.5	69.5	340	63.4	64.9	65.4	68.8	68.7	68.8	340	65.5	66.1	65.8	68.9	68.9	68.9	340	4.9	5.7	5.9	1.7	-0.8	-0.8	5.9	340	7	6.9	6.3	1.8	-0.6	-0.6	7	340	2.1	1.2	0.4	0.1	0.2	0.1	2.1
341							341							341							341								341								341
342	25.6	30.8	43.2	54.7	56.5	56.5	342	43	48.2	49.5	57.3	55.2	57.3	342	42.7	48.7	49.6	55.4	56.5	56.5	342	17.4	17.4	6.3	2.6	-1.3	-1.3	17.4	342	17.1	17.9	6.4	0.7	0	0	17.9	342	-0.3	0.5	0.1	-1.9	1.3	-1.9	1.3
343	25.6	30.8	43.2	54.7	56.5	56.5	343	43	48.2	49.5	57.3	55.2	57.3	343	42.7	48.7	49.6	55.4	56.5	56.5	343	17.4	17.4	6.3	2.6	-1.3	-1.3	17.4	343	17.1	17.9	6.4	0.7	0	0	17.9	343	-0.3	0.5	0.1	-1.9	1.3	-1.9	1.3
344	25.6	30.8	43.2	54.7	56.5	56.5	344	43	48.2	49.5	57.3	55.2	57.3	344	42.7	48.7	49.6	55.4	56.5	56.5	344	17.4	17.4	6.3	2.6	-1.3	-1.3	17.4	344	17.1	17.9	6.4	0.7	0	0	17.9	344	-0.3	0.5	0.1	-1.9	1.3	-1.9	1.3
345	25.6	30.8	43.2	54.7	56.5	56.5	345	43	48.2	49.5	57.3	55.2	57.3	345	42.7	48.7	49.6	55.4	56.5	56.5	345	17.4	17.4	6.3	2.6	-1.3	-1.3	17.4	345	17.1	17.9	6.4	0.7	0	0	17.9	345	-0.3	0.5	0.1	-1.9	1.3	-1.9	1.3
346	25.6	30.8	43.2	54.7	56.5	56.5	346	43	48.2	49.5	57.3	55.2	57.3	346	42.7	48.7	49.6	55.4	56.5	56.5	346	17.4	17.4	6.3	2.6	-1.3	-1.3	17.4	346	17.1	17.9	6.4	0.7	0	0	17.9	346	-0.3	0.5	0.1	-1.9	1.3	-1.9	1.3
347	25.6	30.8	43.2	54.7	56.5	56.5	347	43	48.2	49.5	57.3	55.2	57.3	347	42.7	48.7	49.6	55.4	56.5	56.5	347	17.4	17.4	6.3	2.6	-1.3	-1.3	17.4	347	17.1	17.9	6.4	0.7	0	0	17.9	347	-0.3	0.5	0.1	-1.9	1.3	-1.9	1.3
348	11	16.2	27.6	48.9	53.2	53.2	348	35.6	39	42.4	51.2	52.1	52.1	348	35.6	38.3	42.7	51.5	52.6	52.6	348	24.6	22.8	14.8	2.3	-1.1	-1.1	24.6	348	24.6	22.1	15.1	2.6	-0.6	-0.6	24.6	348	0	-0.7	0.3	0.3	0.5	-0.7	0.5
349	11	16.2	27.6	48.9	53.2	53.2	349	35.6	39	42.4	51.2	52.1	52.1	349	35.6	38.3	42.7	51.5	52.6	52.6	349	24.6	22.8	14.8	2.3	-1.1	-1.1	24.6	349	24.6	22.1	15.1	2.6	-0.6	-0.6	24.6	349	0	-0.7	0.3	0.3	0.5	-0.7	0.5
350	11	16.2	27.6	48.9	53.2	53.2	350	35.6	39	42.4	51.2	52.1	52.1	350	35.6	38.3	42.7	51.5	52.6	52.6	350	24.6	22.8	14.8	2.3	-1.1	-1.1	24.6	350	24.6	22.1	15.1	2.6	-0.6	-0.6	24.6	350	0	-0.7	0.3	0.3	0.5	-0.7	0.5
351	11	16.2	27.6	48.9	53.2	53.2	351	35.6	39	42.4	51.2	52.1	52.1	351	35.6	38.3	42.7	51.5	52.6	52.6	351	24.6	22.8	14.8	2.3	-1.1	-1.1	24.6	351	24.6	22.1	15.1	2.6	-0.6	-0.6	24.6	351	0	-0.7	0.3	0.3	0.5	-0.7	0.5
352	11	16.2	27.6	48.9	53.2	53.2	352	35.6	39	42.4	51.2	52.1	52.1	352	35.6	38.3	42.7	51.5	52.6	52.6	352	24.6	22.8	14.8	2.3	-1.1	-1.1	24.6	352	24.6	22.1	15.1	2.6	-0.6	-0.6	24.6	352	0	-0.7	0.3	0.3	0.5	-0.7	0.5
353							353							353							353								353								353
354							354							354							354								354								354
355							355							355							355								355								355
356							356							356							356								356								356
357							357							357							357								357								357
358							358							358							358								358								358
359							359							359							359								359								359
360							360							360							360								360								360
361							361							361							361								361								361
362							362							362							362								362								362
363							363							363							363								363								363
364							364							364							364								364								364
365							365							365							365								365								365
366							366							366							366								366								366
367							367							367							367								367								367
368							368							368							368								368								368
369							369							369							369								369								369
370							370							370							370								370								370
371							371							371							371								371								371
372							372							372							372								372								372
373							373							373							373								373								373
374							374							374							374								374								374
375							375							375							375								375								375
376							376							376							376								376								376
377							377							377							377								377								377
378							378							378							378								378								378
379							379							379							379								379								379
380							380							380							380								380								380
