# Supplementary material for: Phosphorylation-driven conformational switching of the ArnA–ArnB complex involved in archaeal motility regulation
Source: Front Microbiol. 2026 Jan 15;16:1717585. doi: 10.3389/fmicb.2025.1717585 (PMC12852372; doi:10.3389/fmicb.2025.1717585)
Supplement: Supplementary file 3 [file Table_2.XLSX]

## Sheet: Raw data
Name/Category	MW001-1-1-F	MW001-1-2-F	MW001-2-1-F	MW001-2-2-F	MW001-3-1-F	MW001-3-2-F	MW001-1-1-S	MW001-1-2-S	MW001-2-1-S	MW001-2-2-S	MW001-3-1-S	MW001-3-2-S	MW351-1-1-S	MW351-1-2-S	MW351-2-1-S	MW351-2-2-S	MW351-3-1-S	MW351-3-2-S	MW351-1-1-F	MW351-1-2-F	MW351-2-1-F	MW351-2-2-F	MW351-3-1-F	MW351-3-2-F	MW353-1-1-S	MW353-1-2-S	MW353-2-1-S	MW353-2-2-S	MW353-3-1-S	MW353-3-2-S	MW353-1-1-F	MW353-1-2-F	MW353-2-1-F	MW353-2-2-F	MW353-3-1-F	MW353-3-2-F				Name/Category	MW001-1-F	MW001-2-F	MW001-3-F	MW001-1-S	MW001-2-S	MW001-3-S	t-Test	t-Test 0.01	t-Test 0.05
F2Z5Y7	3528700	3842700	3812100	3841600	3642900	4229800	4227900	4313600	3356500	3254000	3640500	3678100	3528700	3457300	4183000	4428500	2612100	3216700	3925200	4060700	3784900	3679400	4378000	4383100	4965300	5154700	3891800	3532800	3193800	3070700	3579000	3755500	3543700	3634600	4072600	4309000				F2Z5Y7	3685700	3826850	3936350	4270750	3305250	3659300	0.734367	fail	fail
F2Z5Z2	11648000	10087000	7798400	7693800	6022900	5871500	7467000	6611600	8083100	7724500	6084300	5974400	9539000	8344300	7648800	7549900	6253400	6735500	8649400	8402900	7647500	7086100	8471300	7750500	11243000	10849000	9980800	7758600	6899000	6320800	8655700	8498600	10668000	8450700	9942800	9553800				F2Z5Z2	10867500	7746100	5947200	7039300	7903800	6029350	0.259126	fail	fail
F2Z5Z6	2484100	2240500	2064800	1977300	2178100	2098100	2154200	1711800	2249200	1833700	2107000	1863800	2425200	1962200	3095100	3222700	2108800	2106000	2568400	2446700	2498000	2420600	2686900	2322200	3168000	2721000	2775300	2112500	2440900	2293800	2668400	2466400	2942700	2195100	2836500	2487600				F2Z5Z6	2362300	2021050	2138100	1933000	2041450	1985400	0.128334	fail	fail
F2Z601	1012700	983520	1468300	1302200	1338700	1274600	1413300	1206900	1272400	1127600	1207600	1217600	927270	777610	953550	1187800	1027600	1156400	944460	996730	1342200	1227100	1379300	1240500	476080	585070	627680	603810	1011300	996090	1177800	1042900	571520	464810	604510	675410				F2Z601	998110	1385250	1306650	1310100	1200000	1212600	0.903454	fail	fail
F2Z628	695760	912530	1165900	1078200	1184100	1218800	1663600	1149400	530470	501240	1392000	1205300	2661800	2199200	2681500	2289700	1724200	1682400	2344000	2148800	1799000	1743200	1863000	1722900	1443800	1448400	1692100	1309500	1572000	1556500	1995600	2071700	2121900	1719300	1169100	1050600				F2Z628	804145	1122050	1201450	1406500	515855	1298650	0.884131	fail	fail
F2Z652	82538	53870	47658	114400	35867	98371	127040	69692	76091	85315	91238	82538	89467	51548	29988	0	45842	54137	91753	35274	33707	70633	55727	62607	65953	0	92333	57332	0	80839	107410	73317	26946	0	42852	61286				F2Z652	68204	81029	67119	98366	80703	86888	0.300401	fail	fail
F2Z668	0	71761	78684	72118	65848	86430	0	25731	85073	0	88310	67839	118520	108740	125190	111290	78490	47754	113310	105440	81200	86433	80503	84249	0	109790	112040	0	42868	92794	123840	101860	110300	0	0	103730				F2Z668	35880.5	75401	76139	12865.5	42536.5	78074.5	0.413998	fail	fail
F2Z692	5037000	4852700	2744500	2361100	2571200	2086800	2863500	2457600	2448600	2206600	2555800	2071100	2730500	2448200	3948700	4140300	2170500	2089100	3314900	3495100	2945900	2605700	2171700	2343500	2985400	2920800	2699100	2063700	2457000	2265200	2930400	3081900	5309100	4798100	2525200	2329100				F2Z692	4944850	2552800	2329000	2660550	2327600	2313450	0.155404	fail	fail
F2Z698	495120	456560	622200	522260	745970	704500	1580400	755160	436480	474310	639050	654360	855950	646040	683020	617150	503370	657430	448520	663750	717260	531170	702170	689320	890660	733440	469240	513640	504670	474050	549900	499510	601860	372490	656470	622700				F2Z698	475840	572230	725235	1167780	455395	646705	0.375383	fail	fail
F2Z6A6	14052000	14151000	10413000	9800700	9970800	10019000	10487000	9496700	11473000	10508000	9588900	9470000	12218000	10374000	12753000	11868000	8660400	8955500	11722000	12679000	10538000	9905300	10075000	11015000	14508000	14374000	11771000	10141000	9393400	8685900	11563000	11724000	13236000	12852000	10713000	10904000				F2Z6A6	14101500	10106850	9994900	9991850	10990500	9529450	0.209729	fail	fail
F2Z6A8	7520600	8305400	5562200	6631000	5228000	6330400	5281700	5858800	5088800	5150400	4679300	5532500	6899300	6247300	10651000	11110000	5057100	5603400	8612900	8882000	5144900	6154300	6262200	6529500	7865700	8551800	6343500	5777700	5077500	5359700	6716900	7702500	7654900	9040600	5722700	5549400				F2Z6A8	7913000	6096600	5779200	5570250	5119600	5105900	0.0245491	fail	pass
F2Z6B6	555220	647880	417660	394460	365230	343140	354930	315090	407050	391940	454950	416450	633320	543150	919230	909440	482570	475310	668580	755520	537330	460590	554410	481020	771440	792910	674070	590100	481490	398640	597190	558020	830620	860550	633170	506390				F2Z6B6	601550	406060	354185	335010	399495	435700	0.257679	fail	fail
F2Z6C4	13652000	10034000	5126700	4594300	6210300	5958400	5861500	4818200	6389900	5763500	4738800	4624700	6938000	5404900	7746900	7484300	4841200	4497100	7787500	7296000	5531400	5022300	6126100	5721300	6170500	6213300	6614400	4712200	4550900	3973400	5457500	5647600	9675100	8750400	5105500	4714000				F2Z6C4	11843000	4860500	6084350	5339850	6076700	4681750	0.160819	fail	fail
F2Z6C5	567300	361990	456390	437460	434920	425760	567710	450300	412090	326930	486770	484200	604270	533570	696200	748920	453650	470760	611170	589320	507430	486510	565860	531370	605400	734650	618250	516540	471840	457810	525200	537840	627990	638100	457540	490490				F2Z6C5	464645	446925	430340	509005	369510	485485	0.867254	fail	fail
F2Z6D2	1742700	2170300	991560	1161500	1216500	1234100	922170	937460	1064500	1099900	759030	753650	1299100	1261500	1696700	1761200	957080	1148400	1686400	1925100	1644300	1701500	1510200	1604400	1728600	1919200	1464100	1391400	1141100	1068600	1510500	1601700	1848400	2063400	1376300	1476900				F2Z6D2	1956500	1076530	1225300	929815	1082200	756340	0.0268074	fail	pass
F2Z6E5	2375300	2898300	2182800	1849100	2061200	2333600	2157400	1514400	1995000	1845200	1526100	1570800	985000	1214600	1179700	1195800	867290	1530600	1270400	2003900	1790600	1696100	1433700	1806800	1161000	1460000	933010	1181700	1297700	1072600	1843400	1695000	1426800	1705500	892660	1131600				F2Z6E5	2636800	2015950	2197400	1835900	1920100	1548450	0.0184493	fail	pass
F2Z6E6	828850	666240	951190	1023100	967400	1040200	947820	1001800	1065800	1070500	1146800	1199500	1353200	989160	973040	810070	1125600	1242000	1051500	862870	1245100	1228900	1311400	1052300	995480	733840	1260600	791700	1127000	1223900	1220200	1168000	753070	512090	1218900	1137800				F2Z6E6	747545	987145	1003800	974810	1068150	1173150	0.0437659	fail	pass
F2Z6F6	664470	669340	984070	875080	658720	722630	874720	759840	795560	675640	665570	725840	463550	532470	763580	873230	493460	554720	496820	479740	791610	856440	920070	746480	944330	1012400	721600	538620	667730	673340	794460	811660	519320	555010	1015200	1141100				F2Z6F6	666905	929575	690675	817280	735600	695705	0.845128	fail	fail
F2Z6G1	74343	127440	99953	91476	94234	112060	99638	133620	93637	93005	112780	172400	96377	88154	203070	192650	74161	137020	119310	146530	108770	107090	76849	103770	167100	209410	133020	140790	94509	127840	182780	247220	108310	93380	111410	157430				F2Z6G1	100892	95714.5	103147	116629	93321	142590	0.257694	fail	fail
F2Z6G3	81348	42099	96380	66995	137320	169520	116590	93049	116850	47427	84334	102740	100750	64217	69697	56078	67772	61109	92979	60899	113090	86925	104100	68492	124180	95010	0	77979	54339	89115	49962	57218	90315	45217	139230	123460				F2Z6G3	61723.5	81687.5	153420	104820	82138.5	93537	0.808695	fail	fail
F2Z6G7	0	0	73413	62559	101760	69638	14312	51818	36206	31220	116800	128040	20506	0	0	0	258010	205180	19738	0	142980	110130	128730	66372	20928	8256.7	35551	7435.8	232300	232990	94308	6726	14449	0	158030	81862				F2Z6G7	0	67986	85699	33065	33713	122420	0.657285	fail	fail
F2Z6H0	1415800	4978500	5424700	2006100	2013500	1616800	1709500	1589300	2233600	2328400	1233400	1415800	1818000	2262600	2041800	3565500	3566600	1358800	1590700	2224000	3246800	2321600	2760800	2351100	2689500	1664400	2170800	1619400	1504800	1405500	1767800	2396200	2352200	2117700	3033900	1595900				F2Z6H0	3197150	3715400	1815150	1649400	2281000	1324600	0.156252	fail	fail
F2Z6H9	913670	850620	349570	376170	502010	573800	254600	262830	588670	499320	402910	383800	538570	402270	639430	632600	404920	421180	515620	541010	507810	607430	484160	488560	725360	686170	584920	502560	563690	443960	594450	396340	847980	925340	528640	588770				F2Z6H9	882145	362870	537905	258715	543995	393355	0.108559	fail	fail
O05633	7596100	9602400	5796300	7281200	7089200	10466000	6205700	7653300	3175500	3966600	5918100	7459300	3542800	4657800	6765500	7042600	3537500	6381400	8129100	10460000	7125300	8552800	6923500	8333800	6013700	9290100	5523300	6162100	5342300	5967900	6744800	8979800	4948900	9986700	6145700	7965700				O05633	8599250	6538750	8777600	6929500	3571050	6688700	0.0538112	fail	fail
O05634	13497000	11786000	7601300	6664600	5633700	5803600	8318000	7643900	9425300	8605900	7101900	6142400	10084000	8006600	8728400	7074400	8655100	6391800	11156000	8984500	8941600	8184300	9838500	8735000	10609000	7527900	11851000	7826300	7779600	7626500	11237000	9077200	11922000	8057300	10989000	8875300				O05634	12641500	7132950	5718650	7980950	9015600	6622150	0.673603	fail	fail
O05635	8616600	5064500	1561300	1042300	1044200	418030	916080	1217700	1695300	1677800	1433500	523450	4956900	4416200	6341600	6644400	2900700	676310	6019100	2883600	1191800	356270	1730700	807410	1717500	823330	2590300	1178200	1200300	921840	2498800	1138500	6994800	5224700	744530	237960				O05635	6840550	1301800	731115	1066890	1686550	978475	0.227278	fail	fail
O05636	5127800	4870700	4327900	4491400	3836000	4807600	4507200	5404800	4674800	5656200	4145400	4616200	3098600	3688300	2386700	2618400	3276300	5017500	3169000	3800100	4972100	3429600	5562500	4567400	3053600	3104400	3514100	2804900	3719100	4294700	4878500	4868700	2679900	2721000	4755300	5085700				O05636	4999250	4409650	4321800	4956000	5165500	4380800	0.412741	fail	fail
O05637	13463000	12659000	9462200	9170400	10189000	10252000	9556100	8646700	7214800	7343900	8687400	8736100	8634800	8543600	10692000	10612000	8580600	9274800	12492000	13123000	10097000	9743100	11328000	10077000	12500000	11226000	11210000	9598600	8117000	8058400	11377000	10433000	12889000	12841000	10908000	9816500				O05637	13061000	9316300	10220500	9101400	7279350	8711750	0.0115675	fail	pass
O05638	9029900	10565000	6569300	6315100	6710800	8512600	4678000	8219300	3538900	4869600	4755900	6049400	4161900	4091900	7202400	10189000	3923500	4479900	5246500	10007000	5586200	6547400	6276200	5985100	5170000	6637500	5379300	5902300	4693300	5605200	5939100	7749500	7236800	11578000	7285300	8434800				O05638	9797450	6442200	7611700	6448650	4204250	5402650	0.0217285	fail	pass
O05639	9502300	10477000	6489400	7220800	7932200	8430600	5987100	6298100	5324200	5040800	4626300	4798500	6333500	5062000	6381000	5275100	5876500	7364900	8980200	9904900	8585800	7949600	7923500	8495800	5892300	6897700	5921500	6096000	5440200	5227000	8125400	8412600	9284700	8673200	7306500	7997400				O05639	9989650	6855100	8181400	6142600	5182500	4712400	0.00105526	pass	pass
O05640	11200000	14789000	10327000	11438000	4802000	6279100	6460700	9921700	9600700	11194000	6744400	11111000	6958000	7618500	10931000	12080000	6219100	10855000	7823500	11958000	9758300	15732000	9437100	13601000	9761200	13627000	8827300	11006000	9483400	13744000	11591000	13945000	9534900	14082000	10598000	13026000				O05640	12994500	10882500	5540550	8191200	10397350	8927700	0.720614	fail	fail
O05641	10998000	12509000	6875900	7568700	6555000	7263400	8106100	6574800	7720200	7314800	7298600	7877200	8628300	8009300	8440800	8763300	6899300	7293400	8482100	7677600	9008400	8622600	7859400	7847200	9711700	10889000	10519000	8372200	7132100	7180100	9788500	8908400	10993000	11713000	9998500	10249000				O05641	11753500	7222300	6909200	7340450	7517500	7587900	0.296645	fail	fail
O05642	1464200	1469500	2070500	2114000	2208900	2462800	2158000	2324200	1410900	1713200	1539800	2092400	1924600	1733100	1093800	1118100	2688100	2529000	1885200	2339700	2417900	2616800	2883100	2581400	2327100	2100500	2106700	1485300	2893100	2085100	2193400	2409600	1560200	1363800	2434400	2779600				O05642	1466850	2092250	2335850	2241100	1562050	1816100	0.691674	fail	fail
O05643	8779900	8354200	3556600	3720100	2853700	4158800	3761200	3853900	2505600	2648600	3451600	3384200	2789900	3400100	7094500	7834500	3029700	3251000	5722900	6694900	3744400	4303100	3947800	3912100	3745200	4158200	4056900	3728300	3610300	3879200	4040400	4420300	8311800	9571300	4425000	4300500				O05643	8567050	3638350	3506250	3807550	2577100	3417900	0.101685	fail	fail
O05981	0	2283900	2040900	2076600	0	3400300	1755800	1941500	679560	1433400	1131000	2241200	1407300	4935300	6623600	28278000	1937500	1925500	0	2179300	1096900	1878300	833450	1173200	1322700	1315200	933730	1070400	0	2244400	1476500	1119500	0	2874900	1020800	1130400				O05981	1141950	2058750	1700150	1848650	1056480	1686100	0.867233	fail	fail
O05982	442260	443420	332460	395810	292540	269060	327110	329170	358020	316070	354580	343640	388330	332870	390860	553950	352840	342570	434990	496440	445690	424320	360060	439070	596080	597160	558980	476200	363960	339690	524090	534560	398230	550480	510010	530960				O05982	442840	364135	280800	328140	337045	349110	0.456033	fail	fail
O07853	373030	342190	280580	311480	248350	301560	294900	307220	250900	276010	264210	347800	307840	251920	457050	474860	248420	283670	351630	399610	372870	381200	341510	304730	396710	534950	444410	388380	274280	275500	443590	490560	369370	448480	439150	419070				O07853	357610	296030	274955	301060	263455	306005	0.418627	fail	fail
O08357	1369000	1253000	950290	937290	954560	1065400	761890	864460	785520	787130	865480	819620	1168100	995370	1365200	1423700	838010	871000	1034400	1216000	998640	978660	1062000	1026700	1203700	1350200	1038300	978850	909280	822000	1031900	1066500	1484700	1453900	960860	911170				O08357	1311000	943790	1009980	813175	786325	842550	0.0049791	pass	pass
O08358	1176700	963830	1417200	905220	909120	881260	1013900	1201900	992090	1289200	800410	1176700	1166400	747160	939830	840850	1009200	789730	1057300	754830	939420	844410	933380	828110	978580	761530	1295200	926560	905810	742460	890840	719310	789290	1009400	1299900	638360				O08358	1070265	1161210	895190	1107900	1140645	988555	0.752061	fail	fail
O33600	785750	772770	476430	448090	416970	408870	406450	379800	567430	522320	447900	439430	647030	571450	904760	947240	400350	335480	591580	680300	461000	435990	461380	451900	1140800	1219800	822230	707070	529630	518310	724700	731450	878380	990330	791870	802510				O33600	779260	462260	412920	393125	544875	443665	0.272476	fail	fail
O54088	138720	114240	362650	334800	945630	901190	1302300	1074000	190880	211270	336840	370500	400500	301790	164500	411280	308620	422780	336790	291910	383580	384340	389500	303270	242740	416790	375770	291480	221950	193320	239850	192820	278770	395240	291110	299810				O54088	126480	348725	923410	1188150	201075	353670	0.652513	fail	fail
P00219	7426600	11129000	1936800	3548000	1636000	2625200	2209900	3296200	2983500	5979800	2507500	2175100	2550900	3847000	5803600	8023400	1855700	1660800	4099600	5614700	2201900	1079800	1013800	2897000	3013900	3484700	2718600	4931900	1052800	1462700	2407000	2569500	6606300	11477000	1198100	2277700				P00219	9277800	2742400	2130600	2753050	4481650	2341300	0.377251	fail	fail
P08055	66304000	74153000	37151000	44606000	53625000	50457000	34044000	42220000	39410000	45059000	38739000	38464000	39768000	41085000	53980000	62742000	31818000	33473000	51966000	56720000	37031000	44572000	48250000	46281000	33022000	39164000	35677000	33737000	29427000	33487000	40741000	41457000	51855000	53037000	30536000	30449000				P08055	70228500	40878500	52041000	38132000	42234500	38601500	0.0295279	fail	pass
P0DTT6	151940	183520	378340	496450	555730	653840	575760	398430	327740	374060	861910	732510	486000	356660	182010	614920	504640	657460	487610	196180	536820	621750	448550	560080	599960	649120	761270	405090	573340	925110	874890	685310	203970	143760	714600	653730				P0DTT6	167730	437395	604785	487095	350900	797210	0.269534	fail	fail
P11386	38364000	40658000	22693000	22500000	23219000	23588000	25480000	21198000	26507000	25320000	21255000	21748000	30495000	26297000	40414000	39456000	22113000	22440000	34866000	35078000	27040000	25491000	27816000	26389000	35032000	34689000	31151000	25567000	22258000	20948000	29082000	27951000	39912000	41950000	28346000	24367000				P11386	39511000	22596500	23403500	23339000	25913500	21501500	0.205831	fail	fail
P11512	5094400	5470000	4104300	4196500	3351400	4040700	3729800	3482200	4213700	4103400	3405200	3881500	4437300	4150500	5122900	4879900	3183300	3801500	4837900	5128600	4172200	4495900	4353500	4214600	5425500	5945900	5312200	4899200	3484600	4084000	4922900	5468400	4926500	5267600	5036000	5140700				P11512	5282200	4150400	3696050	3606000	4158550	3643350	0.12463	fail	fail
P11513	9148100	9413300	7685600	8601300	6270700	7759200	6849100	6861500	6510300	6825100	6655600	7124600	7501800	6887000	7965600	7766600	5760400	6655000	8959000	9413300	8337900	8430800	9286500	9134300	9654600	9664900	9172400	7469100	6546500	6436400	8461000	9319500	8801400	8253200	8682300	9001800				P11513	9280700	8143450	7014950	6855300	6667700	6890100	0.0189342	fail	pass
P11514	4333500	4067100	3166000	3155600	3038000	3006600	3165600	2823600	3357100	3429400	2795500	2666600	3386800	2722300	2754100	2800000	2644400	2633500	3809600	3580100	3216700	3304400	3537400	3483200	3931600	3678700	3935000	3223500	2991600	2721800	3537000	3005900	3448900	2973100	3702300	3626400				P11514	4200300	3160800	3022300	2994600	3393250	2731050	0.15134	fail	fail
P11521	2354300	2354800	1998800	1959200	1855500	2197500	1794800	1499200	1311700	1295100	1545700	1580000	1901700	1445500	1892200	2476300	1197000	1264500	2557900	2324700	2210100	2034600	2428100	2230800	904790	889280	1306100	939200	1129600	1091700	2065100	2076500	1613200	1782400	925970	872920				P11521	2354550	1979000	2026500	1647000	1303400	1562850	0.000330034	pass	pass
P11522	8156800	8307700	5201100	5986600	5121100	6061400	5465300	5087100	6536200	6309300	5221900	5467700	6705700	5373900	7809000	8250000	4651100	5260500	7749200	7675700	6692600	6859700	7088400	6827500	5490100	5892600	5618900	4775600	4765400	5072800	6852900	7766800	7338500	6333000	5402400	5869400				P11522	8232250	5593850	5591250	5276200	6422750	5344800	0.236375	fail	fail
P11523	2085100	1373600	2867300	2294900	3266300	2851600	3418100	2890100	3312500	2857000	2778300	2808200	2368800	1674000	821330	418830	3700400	2814500	2307800	1536600	4291100	3376000	3696800	2511300	1955400	1058400	2047400	1121700	3713500	2422500	2529800	1791800	1410100	705880	3260200	2594700				P11523	1729350	2581100	3058950	3154100	3084750	2793250	0.0948425	fail	fail
P11524	15849000	12459000	10633000	8935500	4952500	4039300	9305200	7152800	7162500	7164800	5630200	4238400	10629000	9643900	12357000	11336000	6029000	4849200	14028000	12475000	6988300	6577800	11279000	9935100	8801000	8976900	9221400	7707400	5597500	4917000	8586800	8551300	12638000	12459000	7291000	7460300				P11524	14154000	9784250	4495900	8229000	7163650	4934300	0.198928	fail	fail
P13005	4790900	3658800	4451400	4507100	4878500	5879900	5651300	5018000	3371600	3099200	3994600	4243400	4598700	3321000	0	208010	4350300	4966800	5117400	4719500	6247100	6206200	6567200	5911400	3044600	2363700	3744300	2325000	3498400	4028200	5690900	5850100	1303700	495850	4166100	3844700				P13005	4224850	4479250	5379200	5334650	3235400	4119000	0.369181	fail	fail
P13123	87708000	71400000	37434000	39436000	37038000	43438000	50592000	47842000	34111000	30138000	43589000	23877000	91885000	60797000	83676000	82913000	33329000	32121000	86513000	74060000	47879000	40590000	62917000	50849000	35967000	34748000	48400000	33891000	33040000	27851000	46122000	39602000	74000000	62276000	25034000	19899000				P13123	79554000	38435000	40238000	49217000	32124500	33733000	0.172657	fail	fail
P13125	34419000	39617000	13385000	11835000	15431000	11439000	15996000	20205000	12042000	10424000	9902700	7162200	19909000	21273000	24158000	30358000	9869800	7748100	26086000	22572000	10695000	7577800	17624000	20434000	15090000	12703000	14244000	12074000	6449200	8248100	12695000	9679300	31622000	50566000	6461300	5680600				P13125	37018000	12610000	13435000	18100500	11233000	8532450	0.156656	fail	fail
P14288	306800	296290	253070	269800	131870	151190	120800	181410	183610	219490	274230	324120	326800	325800	490240	511980	242520	310360	289050	459900	214600	287630	235310	300500	427010	487450	289660	365760	245740	236070	330640	445570	373190	454770	365220	451660				P14288	301545	261435	141530	151105	201550	299175	0.689041	fail	fail
P17196	64935000	69518000	44458000	43058000	40356000	40459000	42983000	40537000	39162000	37143000	35406000	34037000	49467000	45883000	50648000	57466000	33202000	34641000	54947000	57743000	41460000	45254000	44437000	50806000	53379000	56936000	50208000	43793000	34266000	31128000	42124000	41982000	64973000	68108000	44768000	42286000				P17196	67226500	43758000	40407500	41760000	38152500	34721500	0.0514595	fail	fail
P17198	8377100	8707800	5284100	5248500	4683200	4913600	4233900	4096800	5116500	5000900	4484600	4569600	4912900	4376100	7414600	8237700	4027800	4958500	6458000	7613000	6820300	6726900	6189300	6591100	9493800	9842900	7334400	6105400	5268000	5199800	8044000	8074000	9675400	9343000	9568300	9104800				P17198	8542450	5266300	4798400	4165350	5058700	4527100	0.0604336	fail	fail
P17199	13102000	12465000	9727900	9878100	8869000	10719000	9924500	8612100	7708700	6907500	9074100	8974700	9097300	7861700	10233000	8725000	7715800	8440900	10795000	12443000	10492000	9812400	8829200	10523000	8132900	8377200	7141300	6329900	7440400	7082600	10573000	10993000	11095000	8878200	8909400	9300600				P17199	12783500	9803000	9794000	9268300	7308100	9024400	0.0188298	fail	pass
P23112	15735000	15445000	10825000	10680000	10420000	11198000	10562000	9587500	11402000	10431000	9251800	9250900	11979000	9496500	12584000	12340000	8520900	9260400	12752000	12546000	11983000	11534000	13489000	11904000	13291000	13275000	11238000	8671900	8287200	8432300	10645000	10337000	12830000	12823000	11930000	11518000				P23112	15590000	10752500	10809000	10074750	10916500	9251350	0.0585561	fail	fail
P27340	65144	200850	51531	80789	38130	319490	109900	162880	93467	330400	0	132340	282000	461820	1049800	1255200	0	204620	0	218890	0	96037	0	307080	0	159780	0	334120	64153	762270	0	175780	0	843210	0	183540				P27340	132997	66160	178810	136390	211934	66170	0.852128	fail	fail
P27341	1135100	2113000	1313000	2130600	2529200	3114800	1849000	1868400	1794800	2044000	2277600	1871000	2031300	1785600	2794400	1415200	1393500	3051200	1750200	3585200	3251900	3493700	873150	2877200	1664300	1614100	1403900	1766300	2626600	2159500	3624900	2808200	1060200	1258800	1550100	2124400				P27341	1624050	1721800	2822000	1858700	1919400	2074300	0.742939	fail	fail
P27414	958380	1250400	1217300	1456300	1380700	1684800	1378400	1387300	1353200	1444700	1136000	1360600	1053400	977530	1174400	1146800	979570	1317400	1139800	1305400	1353100	1395200	1328600	1355900	922640	990540	1053200	1024000	1221400	1244600	1256200	1348400	850280	1200600	1183600	1167100				P27414	1104390	1336800	1532750	1382850	1398950	1248300	0.867389	fail	fail
P28461	14127000	11375000	14830000	15070000	13390000	12292000	14491000	13215000	12621000	10952000	12251000	10216000	16715000	12228000	10331000	8329700	11596000	9724000	15124000	13587000	14754000	12561000	18283000	17872000	9925900	6556200	10127000	6838600	10169000	8542400	13787000	13362000	9026700	3529800	9967300	7861400				P28461	12751000	14950000	12841000	13853000	11786500	11233500	0.188386	fail	fail
P35023	9731200	6760200	9757200	9740500	11754000	9675100	11102000	11042000	13174000	10137000	9831900	10602000	8335600	6290800	7026400	4147400	11437000	10852000	7530700	6042900	10591000	10914000	12460000	10233000	7887800	5445500	9883200	6541800	9776400	10370000	10363000	8797000	5953500	5286400	11946000	10004000				P35023	8245700	9748850	10714550	11072000	11655500	10216950	0.112648	fail	fail
P35024	7293600	7440500	6988800	6455400	7394000	7521200	5065400	5584600	6985300	7944900	5951900	6627100	7427500	6151000	7601500	7163800	5713500	6172200	9646400	7479500	7276400	9163100	8861100	7324400	5844100	5447600	8089200	5287500	7545200	5936500	9244700	9114300	6374200	7077700	8222600	6746700				P35024	7367050	6722100	7457600	5325000	7465100	6289500	0.101106	fail	fail
P35025	9088000	11497000	9554800	10221000	11500000	12554000	9536700	11430000	8537400	9362400	8647900	10319000	7063000	7799600	11607000	12002000	7959500	9418900	9559800	10386000	8800200	10077000	8695000	9816200	4796500	5689100	5135700	5171100	6997000	6775200	8335600	10145000	7938400	9981200	4170400	5773200				P35025	10292500	9887900	12027000	10483350	8949900	9483450	0.149387	fail	fail
P35028	5270800	4035200	7294900	5703300	7289000	6962900	12868000	8315600	7003600	9606100	7904400	7180100	3789100	2999100	4701800	6684000	8224700	6690200	4039900	3766700	6616100	6452200	7093900	4466200	2950600	2794700	2806800	2949800	6170600	7677600	4435200	3237400	2805000	4964600	5270700	4728100				P35028	4653000	6499100	7125950	10591800	8304850	7542250	0.0263826	fail	pass
P35029	1929300	2250000	2288800	2298700	1916200	2097800	2160500	1930200	1678700	1642600	2365600	2461400	2177200	2070200	2706000	2764400	1845100	2268100	2394500	3042800	2409000	2362800	2431300	2428100	2770800	3093900	2302300	2062200	2187000	2179700	2587800	2679900	2730800	2866900	2526500	2631600				P35029	2089650	2293750	2007000	2045350	1660650	2413500	0.58146	fail	fail
P37820	2177000	2100600	2194400	2057800	1996300	2130700	2394600	2274500	2052200	2061900	2411900	2422200	2112600	2011400	3153300	3719900	2152900	2418200	2798900	2819900	2813900	2420300	2685900	2386800	2983000	2948400	2635100	2271100	2222500	2213400	2721800	3019500	2831300	3065800	2651500	2537100				P37820	2138800	2126100	2063500	2334550	2057050	2417050	0.0639881	fail	fail
P38613	8274700	9510300	4641000	5292200	5197700	6599000	4481800	5268300	5190100	5458100	4817000	5066900	6052300	6299100	6860500	6958300	4119200	5234800	6469400	8101100	5536800	6936300	5785400	6453300	4613000	5965500	4804100	4891200	4097500	3832100	5881500	6919700	5569300	6678200	4483100	5345200				P38613	8892500	4966600	5898350	4875050	5324100	4941950	0.0847011	fail	fail
P38617	4752800	5346000	4109800	4035800	4190200	4663200	3438000	3732500	3225700	3787500	3160200	3077100	3021100	2818000	3430200	3356400	2828800	3216900	4120600	4238000	4006600	3511900	3980000	4042900	4026600	3325600	3582700	2750300	3266100	3621600	3922300	3743900	3689600	4094700	4016600	3555700				P38617	5049400	4072800	4426700	3585250	3506600	3118650	0.000916505	pass	pass
P38618	5640700	5758200	5066100	6353600	6115000	8005900	5806300	4650100	6476600	6304400	5179200	6039700	4014300	5128400	3553500	4011900	5746200	6664200	5290800	6328600	4590600	4981300	6344400	6264500	3805700	5568900	3191400	3180700	5308100	5507700	6053800	5594800	4562200	1411400	5324100	4485300				P38618	5699450	5709850	7060450	5228200	6390500	5609450	0.428091	fail	fail
P38619	643910	700090	557600	675470	627980	627050	593220	582450	619050	636770	613070	642130	746680	597500	776290	715430	332030	530020	662280	722690	614300	786610	553210	671070	559660	644000	435900	446930	625500	601440	338690	397000	661170	782120	606170	668580				P38619	672000	616535	627515	587835	627910	627600	0.29985	fail	fail
P39463	3702900	2279600	2606800	2387500	2465500	2530600	3426000	2880600	2592100	2442600	2265400	2787200	3109100	2134900	2078900	1687100	2209700	2605300	3164100	1992000	3791300	2740200	3057300	2439400	2465400	918540	2069000	988930	2104300	1704600	2674900	2210500	2279100	1104000	2320100	2005900				P39463	2991250	2497150	2498050	3153300	2517350	2526300	0.800444	fail	fail
P39464	3715200	3523500	2901100	2846400	2146800	2499400	2634200	2303700	2809500	2645000	2323700	2604800	2814800	2649200	2454700	2558200	2009600	2198700	2996900	3249900	2349500	2919800	2813900	2913400	3388700	3786100	3098600	2730300	2099400	2119200	3065000	3307600	3151200	3542500	2695600	3107800				P39464	3619350	2873750	2323100	2468950	2727250	2464250	0.163959	fail	fail
P39466	3947800	3969800	2945600	3896800	2740600	3131700	2885300	3810100	3090300	3602000	2808600	3161800	3636600	3511600	1891500	2768500	3157500	2858200	2681600	3677900	3539200	3540200	3577200	4222300	3106100	3917200	3301000	2701000	2637000	2659400	2814300	2978100	5179800	4469700	3679700	3669200				P39466	3958800	3421200	2936150	3347700	3346150	2985200	0.467445	fail	fail
P39467	7187800	7682500	4901500	5114100	4664200	5236400	4551100	4566700	4208700	4016500	4162600	4625700	5204300	4409700	7340800	6319400	4853100	5026800	7120700	7706400	5762400	5756300	5581200	6096200	6354400	6356600	6105900	5336300	4358800	4093000	6185400	6464700	6637700	6892300	6121200	6251200				P39467	7435150	5007800	4950300	4558900	4112600	4394150	0.0230505	fail	pass
P39468	15235000	14583000	9269300	10087000	7787500	8462900	11346000	12205000	8483600	10879000	7213000	7419400	10695000	9157000	15125000	15472000	7652300	6944200	10813000	14165000	10573000	10060000	10351000	11130000	9556400	12303000	8954800	9181500	7146700	6915900	10129000	10339000	16175000	17198000	10291000	10091000				P39468	14909000	9678150	8125200	11775500	9681300	7316200	0.424066	fail	fail
P39469	14868000	14358000	8866600	8876300	8796300	9065700	9446300	8731100	8884200	8461400	8806000	7722800	11005000	9121500	15357000	14233000	7908200	8012000	14715000	13676000	10629000	8875400	11853000	10141000	8132700	8437500	8840400	6671700	6185900	5670900	10698000	10339000	13955000	12583000	7484300	7303500				P39469	14613000	8871450	8931000	9088700	8672800	8264400	0.113649	fail	fail
P39470	11881000	12166000	9479800	10274000	9292600	10727000	9936500	8770100	9717000	9097900	8856900	9928800	11581000	10988000	14609000	16163000	7935600	9206200	11674000	15302000	11226000	11802000	10619000	12501000	11460000	13132000	9967800	9422000	7796300	7482300	12532000	14848000	13220000	14846000	11067000	12284000				P39470	12023500	9876900	10009800	9353300	9407450	9392850	0.0416317	fail	pass
P39471	4087500	3949200	4604900	5748200	4164100	5594000	3980300	4162800	3888200	4330400	3538400	4349400	5108200	4068300	5481000	5273600	4255600	4671100	5561300	5566100	5552500	5078900	5305700	5896700	5295500	5065800	4237200	4117000	3933200	4538500	4994200	4752500	4244600	4261300	4640700	4595800				P39471	4018350	5176550	4879050	4071550	4109300	3943900	0.0904004	fail	fail
P39472	2321600	2602900	1905600	1922400	1461000	1602100	1453200	1499700	1826300	1692000	1706000	1598400	2352700	1910000	2664200	2474900	1500100	1391000	2792800	2760400	1851100	1725800	2244200	2134100	1401600	1443500	1676400	1464000	1598200	1404900	2147000	2106200	1480500	1906200	1472000	1353800				P39472	2462250	1914000	1531550	1476450	1759150	1652200	0.0953277	fail	fail
P39473	8465100	13466000	3931100	4505200	4163600	4646800	3610900	4550100	4440400	4856400	3615100	3659400	5260500	7057700	9161000	8277400	4570600	4750700	6739500	6543300	3377900	5016200	2821800	4852300	4002700	5533500	4687700	4938700	3362700	3765200	4227200	5841300	9725200	13288000	2662400	4350500				P39473	10965550	4218150	4405200	4080500	4648400	3637250	0.154801	fail	fail
P39474	4931900	7807700	3007200	4105300	3624400	4128100	3133600	4332700	2866300	3799100	2782400	3843000	3713900	4149800	5496700	6187300	3569700	3674300	5229600	6375700	2751700	3330200	2421700	4411400	2614100	3321300	3082200	3118600	2793500	2596500	3918800	5031400	6292400	7122000	2825800	3421100				P39474	6369800	3556250	3876250	3733150	3332700	3312700	0.152565	fail	fail
P39478	18741000	16709000	12424000	13390000	12801000	14876000	12316000	12760000	13793000	14083000	13027000	13487000	12194000	11696000	12508000	15142000	11298000	13141000	15973000	15979000	15302000	15274000	15896000	14192000	17727000	16973000	15568000	12368000	14104000	14375000	15302000	16337000	14026000	14134000	16684000	14744000				P39478	17725000	12907000	13838500	12538000	13938000	13257000	0.16315	fail	fail
P39479	1339700	1076600	1109900	1063700	2106000	1760000	1992800	2125900	1953900	2061200	1600200	1488300	898880	704900	376450	0	1720900	1306500	769150	0	1244400	968210	1206100	861620	1260500	524470	1082600	760700	1298000	1175900	1221400	1125000	884530	0	1333300	1043400				P39479	1208150	1086800	1933000	2059350	2007550	1544250	0.049343	fail	pass
P39480	5810200	5891100	3276800	3564000	3642700	4320200	3856700	2796000	4302400	4234000	2908700	3593100	3244700	3684800	4457700	4706800	2236200	3150700	3141400	3642100	3064700	3422000	3081100	3075100	4699100	5449200	4045700	3410500	2491700	2702900	3335500	3996500	2833300	4377800	3982000	4462400				P39480	5850650	3420400	3981450	3326350	4268200	3250900	0.170062	fail	fail
P39481	0	0	0	0	0	0	0	0	0	0	0	0	0	0	0	0	0	0	0	0	0	0	0	0	0	0	0	0	0	0	0	0	0	0	0	0				P39481	0	0	0	0	0	0	#DIV/0!	#DIV/0!	#DIV/0!
P41202	12307000	11380000	7311100	8015600	6331200	7164700	6058200	5828100	5040600	5279800	4941700	4049700	7203200	6806800	7995800	8766600	4891900	4669700	9884100	10154000	7178700	6377700	8613200	7310000	7019900	7378900	6905600	5538500	3387100	3355500	8393000	7341100	11162000	11440000	7515100	6748700				P41202	11843500	7663350	6747950	5943150	5160200	4495700	0.00698219	pass	pass
P46215	4073600	4236400	3599800	3789600	3056200	3338100	3543800	3302100	3100300	3044100	3513200	3524700	3951000	3681400	4135300	4401400	3123600	3548600	4231200	4238800	4044200	3678500	4053500	3763500	5007900	5096900	4469400	3831400	3510600	3303000	4201100	4185200	4126700	4496700	4257400	4087000				P46215	4155000	3694700	3197150	3422950	3072200	3518950	0.121408	fail	fail
P46217	1255000	1190600	1539700	1524300	2533300	2527400	1728000	2459600	2877100	3489300	2579200	2834900	954820	377330	187060	190500	3950800	3746100	1148400	676770	2302200	1710700	1923100	1351800	619150	68560	672540	156040	3085000	3490700	1642300	1317400	743360	184220	1900500	1441700				P46217	1222800	1532000	2530350	2093800	3183200	2707050	0.0258234	fail	pass
P46218	1520700	1296500	873260	967880	619180	688720	765560	570240	1135900	1017500	840970	891410	1216400	1056500	1517200	1677200	1136700	1238100	1226200	1653600	900840	1010200	959530	919320	1796100	1934700	1954600	1719200	1054100	846630	1457700	1582000	1572100	1619100	1496700	1406200				P46218	1408600	920570	653950	667900	1076700	866190	0.468118	fail	fail
P49978	2722600	3631400	1173200	1491600	826490	812810	571220	650320	1331300	1720200	942450	1130400	1469700	1443400	1606900	2741200	1036300	1334700	1470100	1995300	1101200	1512000	1173200	1461200	2327400	3045100	2205200	2381900	1049800	1278300	1397100	2011500	2585200	2456700	1838100	1698400				P49978	3177000	1332400	819650	610770	1525750	1036425	0.182395	fail	fail
P50308	13464000	11739000	9778300	9192200	8879100	9930000	9697200	8405300	8966100	7347700	9805600	9220800	12652000	9955000	12925000	9915900	8500200	8601100	13448000	12882000	11821000	11586000	11505000	11014000	8188800	7840200	9476400	7677600	8427300	7460300	10821000	10421000	11017000	9316700	7301600	7166800				P50308	12601500	9485250	9404550	9051250	8156900	9513200	0.078298	fail	fail
P60464	2343300	2111000	1661300	1811400	1628600	1981200	1376800	1450200	1770300	1642800	1697900	1704700	2080100	2160800	1186200	707040	1319100	1921000	2238600	2425900	2158300	1800200	2040400	1842500	2709300	2926200	2357500	2019300	1531600	1585400	2476500	2661200	1395900	258460	2105200	2368900				P60464	2227150	1736350	1804900	1413500	1706550	1701300	0.035454	fail	pass
P74766	451820	483260	787260	959480	1070700	1088100	574590	934360	978590	1033400	979560	1061500	691710	570220	800280	1182500	695150	938070	666090	649570	621940	842350	980800	807020	476740	681010	592640	545580	872810	988300	654300	816700	433190	895420	649640	836720				P74766	467540	873370	1079400	754475	1005995	1020530	0.400422	fail	fail
P95690	690540	805780	510750	487310	535250	566420	538570	515890	435090	421500	401670	426220	516330	495220	678730	759160	471370	541350	677790	800070	617140	644370	622180	631980	781560	915730	629470	566700	501420	463760	702320	736180	705750	801870	643140	677660				P95690	748160	499030	550835	527230	428295	413945	0.0276958	fail	pass
P95691	1993500	1894600	1489600	1490200	1513400	1620600	1495800	1386500	1500200	1486100	1342700	1319800	1820600	1437500	1927400	1709800	1288200	1413700	1978500	1943700	1649000	1670900	1732900	1708100	2211900	2239600	2000600	1647700	1324700	1325000	1895700	1976400	2201000	1780700	1802100	1757600				P95691	1944050	1489900	1567000	1441150	1493150	1331250	0.0296203	fail	pass
P98004	0	0	35253	13868	29440	21274	0	0	59379	41220	17306	10676	0	0	0	0	0	0	0	0	28905	7073.7	23770	12284	0	0	0	0	0	0	13263	0	0	0	16621	0				P98004	0	24560.5	25357	0	50299.5	13991	0.686086	fail	fail
Q07271	1036200	1063500	607050	752070	365750	358510	600240	546560	289490	739980	504050	538450	404430	766260	738630	842140	392730	544040	414470	680930	352530	549500	525990	684960	713990	538650	302950	351310	138810	299260	286460	884240	483420	0	235740	355170				Q07271	1049850	679560	362130	573400	514735	521250	0.279397	fail	fail
Q07590	7995800	8087700	4938000	4787700	4491000	4652900	5129100	5008800	5234900	5021700	4357500	4201400	6124100	5216400	6992600	7070200	4434500	3966000	6426900	6657700	5106300	4736800	5591700	5418500	7308900	7504900	6365400	5221900	4032600	3758500	5057300	5615300	7961200	7333200	5365200	5123600				Q07590	8041750	4862850	4571950	5068950	5128300	4279450	0.198144	fail	fail
Q08582	1163100	1083300	936690	911670	817230	872110	915910	833380	1021600	950950	861490	954080	763710	680250	615100	749050	661850	843350	794500	823150	918530	949110	962210	858420	1067500	1121000	1021300	845120	862270	902630	1027100	1046500	851340	840040	1018900	1005900				Q08582	1123200	924180	844670	874645	986275	907785	0.513816	fail	fail
Q08713	31268000	32375000	5417200	5711000	4735100	5492100	5699400	5995300	14469000	13433000	4514100	4264200	10332000	8834500	13195000	12378000	4962300	5671200	12581000	12624000	6791900	6436100	7454200	7337900	17609000	17367000	16577000	13630000	4290700	4294300	8020500	8760700	16435000	16624000	14630000	13755000				Q08713	31821500	5564100	5113600	5847350	13951000	4389150	0.324962	fail	fail
Q4J6C8	751920	772500	376440	330410	230280	270520	261410	249670	498510	420660	314770	301200	462370	420780	295150	377910	255710	300300	667900	567880	390290	412580	428640	384260	643920	564400	576170	680240	390460	384760	409180	464470	684220	477450	507220	450430				Q4J6C8	762210	353425	250400	255540	459585	307985	0.310378	fail	fail
Q4J6C9	12006000	11260000	8377800	8300500	6686500	7622500	7796100	7120000	7907400	8242500	7036900	7178600	9135600	8933500	12123000	12927000	6930600	6573200	10327000	10091000	7569700	8431800	8691100	8571800	11789000	12523000	9090000	8231300	6958100	6283100	9403500	10027000	12206000	12533000	7596000	8444000				Q4J6C9	11633000	8339150	7154500	7458050	8074950	7107750	0.122102	fail	fail
Q4J6D0	68924	0	98536	39815	81395	99637	95597	71926	98322	87366	130460	115840	228550	130380	0	293520	161840	195560	146860	119960	120400	156750	119040	138720	153320	157900	168540	73373	110750	179550	150910	175060	0	0	105820	154390				Q4J6D0	34462	69175.5	90516	83761.5	92844	123150	0.0776412	fail	fail
Q4J6D1	639540	471640	535760	506540	484270	526670	591720	564940	482900	611040	555670	524870	688320	446180	876920	833280	470490	501150	679540	761930	574380	604840	634080	596270	666830	734680	663140	629400	452740	496520	634480	642000	742840	782680	562450	678900				Q4J6D1	555590	521150	505470	578330	546970	540270	0.390458	fail	fail
Q4J6D2	0	0	0	0	0	0	0	0	0	0	0	0	0	0	0	0	0	0	0	0	0	0	0	0	0	0	0	0	0	0	0	0	0	0	0	0				Q4J6D2	0	0	0	0	0	0	#DIV/0!	#DIV/0!	#DIV/0!
Q4J6D3	911190	910310	754620	789900	677880	571380	726010	687290	854150	837200	750400	672400	993420	824510	955060	1018500	614840	617400	845040	981600	899040	682310	935010	834180	957220	1027000	935030	813500	723890	543490	874960	845770	988260	747890	851660	672870				Q4J6D3	910750	772260	624630	706650	845675	711400	0.819435	fail	fail
Q4J6D4	0	8304.2	0	0	9671.8	17741	28600	24059	26644	18425	3983	12725	5719.2	3862.6	3557.9	0	2205.5	19263	0	11488	7205	2195.9	0	2246.2	0	0	0	533.52	18285	10714	0	2388.5	0	0	0	255.95				Q4J6D4	4152.1	0	13706.4	26329.5	22534.5	8354	0.0221416	fail	pass
Q4J6D5	807120	920740	809650	861590	746500	871990	823530	801120	850270	905510	944680	1010400	1079800	920380	980180	1232100	861230	1109700	953680	1147400	975270	1022500	937910	1020600	1096100	1225800	1027700	979530	999420	1017200	1196700	1190500	897900	1211100	1086100	1051400				Q4J6D5	863930	835620	809245	812325	877890	977540	0.224695	fail	fail
Q4J6D6	263580	148710	405400	367820	448170	394370	538710	427390	515260	460580	512790	537770	473460	185420	115830	99776	457220	499450	163830	194030	693540	556730	545050	478840	291840	198830	358960	191070	593020	499340	349210	375700	116840	110960	453380	430390				Q4J6D6	206145	386610	421270	483050	487920	525280	0.00835442	pass	pass
Q4J6D7	317510	371920	332630	359870	333830	413050	360800	367140	369870	352300	333890	374900	245980	264980	186170	342780	230930	356980	276470	357800	307500	440410	324590	376960	391060	513950	329220	362260	299260	348410	350740	423200	308100	379250	231310	437130				Q4J6D7	344715	346250	373440	363970	361085	354395	0.751916	fail	fail
Q4J6D8	3324300	2785000	1296000	1443700	1421700	1387900	2260300	1753900	2355400	1735400	2574600	998090	3577200	2253500	2499100	1968600	2369000	1331000	3574900	2378100	1514800	1566900	2467800	1859600	2831100	1254100	2349300	1054200	1508800	960230	1762100	2086800	2845800	1740500	1247700	1188600				Q4J6D8	3054650	1369850	1404800	2007100	2045400	1786345	0.99422	fail	fail
Q4J6D9	544630	566430	426480	445560	434360	512300	422480	356630	458830	458970	433600	459580	567430	493570	715400	710120	381450	478530	628940	669140	582600	513930	516720	472690	765660	774550	720660	556500	529170	527510	682010	675070	724610	733010	626350	601350				Q4J6D9	555530	436020	473330	389555	458900	446590	0.0853945	fail	fail
Q4J6E0	682330	575850	768320	747840	742990	818010	780420	796210	819900	769630	717900	750330	801090	641370	530790	767930	755020	792220	759690	637270	950340	889360	938700	843340	819660	599200	779520	570520	745440	793420	897710	780240	683590	910890	867060	778480				Q4J6E0	629090	758080	780500	788315	794765	734115	0.211168	fail	fail
Q4J6E1	1946300	1619000	1324100	1289400	1343100	1377900	1393600	1200600	1416500	1338800	1159200	1100700	1292300	1126400	1121900	1307700	954990	1141700	1421500	1429100	1314000	1262100	1543000	1316200	1585000	1533600	1401800	1061800	1077800	1111800	1400100	1397100	1178200	1240100	1377500	1359800				Q4J6E1	1782650	1306750	1360500	1297100	1377650	1129950	0.0969483	fail	fail
Q4J6E2	214880	358520	218560	191460	196320	208000	255670	304940	258950	150760	228920	226430	297250	261290	265820	257460	212320	309260	228990	228530	249160	327150	213710	193120	307590	276760	360340	253990	210860	262940	282850	390630	268270	229110	273870	258670				Q4J6E2	286700	205010	202160	280305	204855	227675	0.852712	fail	fail
Q4J6E4	138110	220600	181820	148670	74423	112370	88988	45279	105890	0	0	167610	144680	90426	98393	123040	30273	41456	132960	0	131940	167590	162180	156950	59191	120140	64571	0	94292	73745	0	73910	176290	185480	184530	184260				Q4J6E4	179355	165245	93396.5	67133.5	52945	83805	0.044752	fail	pass
Q4J6E5	20607000	12403000	23831000	17913000	16622000	15064000	17593000	14703000	14577000	13398000	22911000	20812000	14014000	12914000	16915000	15244000	13296000	14599000	24755000	18331000	19669000	15088000	22220000	18663000	23479000	19019000	29828000	15849000	20643000	20724000	16041000	13935000	14073000	10692000	21138000	17925000				Q4J6E5	16505000	20872000	15843000	16148000	13987500	21861500	0.861477	fail	fail
Q4J6E6	0	0	94314	0	83892	54908	0	67213	71360	79221	118830	93677	0	17136	0	0	141150	146130	0	0	169680	101130	101070	61513	0	0	0	0	72543	93930	38752	55836	0	0	88951	59906				Q4J6E6	0	47157	69400	33606.5	75290.5	106254	0.207176	fail	fail
Q4J6E7	1281300	1207900	982250	811250	689740	719770	860450	669550	1036700	1043500	937020	744540	1099100	903290	986810	938970	582090	581230	868690	867920	1111900	906700	971900	826010	1030000	959350	831600	662960	999650	757640	751590	949990	1199100	1008500	1004600	867960				Q4J6E7	1244600	896750	704755	765000	1040100	840780	0.591509	fail	fail
Q4J6E8	279540	228650	303290	370990	220860	306650	128900	224650	361270	338420	166030	289850	452560	321080	131410	121570	197000	346790	126130	222320	379320	449780	401710	471890	326300	231400	205880	219830	209110	241890	219750	229610	198680	186080	431350	470800				Q4J6E8	254095	337140	263755	176775	349845	227940	0.470093	fail	fail
Q4J6E9	802870	715600	473620	479410	510610	628970	670040	553070	586860	593000	506130	501710	788960	750990	908020	1003400	551330	392610	822390	852920	559820	459220	633880	476920	763910	708540	769840	549740	449040	468090	665910	549860	664120	794420	595830	490720				Q4J6E9	759235	476515	569790	611555	589930	503920	0.599534	fail	fail
Q4J6F0	1094700	1648400	865250	1183500	1000200	1417400	1097900	1156200	1045900	1110600	1027900	1079900	869480	762840	1454000	1566500	943180	1216400	1006200	1379600	1153900	1364400	1026000	1207500	1206200	1675900	986340	1173800	1147400	1260500	1064600	1286500	1276300	1503100	1082700	1429700				Q4J6F0	1371550	1024375	1208800	1127050	1078250	1053900	0.354589	fail	fail
Q4J6F1	8901600	11188000	5139200	5625800	7198400	8961400	4280600	4667300	5970400	7287200	5436000	6646100	5533300	6235800	9616000	10021000	4911400	5923900	5157600	6831800	4846000	7100500	4645500	6878200	3370100	10104000	5332300	6429300	4798700	6410200	6117500	6627300	4897100	13043000	4066800	5087700				Q4J6F1	10044800	5382500	8079900	4473950	6628800	6041050	0.0701124	fail	fail
Q4J6F2	912360	749060	752910	795720	807400	1015500	745860	711220	803240	821480	632680	755260	891350	722150	704410	678820	800020	947590	711700	847520	866490	1077200	1025300	986380	935910	1136000	955780	772370	731490	743870	720260	980710	497090	726560	1010900	996100				Q4J6F2	830710	774315	911450	728540	812360	693970	0.095475	fail	fail
Q4J6F3	2254100	1453800	1956400	1619500	2523700	2252300	2662700	2463600	2542300	3177600	2135800	1419900	2183300	1420300	1230300	2350300	1861400	1671800	1962900	1701600	2618200	2118700	2485700	2019800	1798000	436790	1989000	1532100	2044100	1761600	1948600	1794200	1254400	2150000	2706600	2015600				Q4J6F3	1853950	1787950	2388000	2563150	2859950	1777850	0.212324	fail	fail
Q4J6F4	0	896330	2131200	0	2459300	2338900	3381200	2587200	2991700	2202500	1920100	1759900	0	670130	0	0	2400500	2141500	0	0	1681000	1451200	1644100	1214000	0	0	0	0	1638300	1305400	0	0	0	0	1618900	1159200				Q4J6F4	448165	1065600	2399100	2984200	2597100	1840000	0.0544505	fail	fail
Q4J6F5	3497700	4220700	1626700	1989600	2097700	2115600	2159400	2198300	2379900	2553200	1632700	1634300	2295900	1899900	2838800	3133300	1643700	1431700	2428400	2767600	1866300	1885300	1749200	2098400	2826200	3277500	2827100	2374100	1398000	1545200	2146600	2474600	3953400	4412500	2205100	2533300				Q4J6F5	3859200	1808150	2106650	2178850	2466550	1633500	0.290071	fail	fail
Q4J6F6	516730	1384100	132530	355280	353610	384530	880820	492470	733160	1090900	0	339540	389790	504140	0	266410	468600	642130	0	284970	422500	244220	360640	262660	393780	0	559730	369580	455010	315710	484640	422190	0	523890	387760	482100				Q4J6F6	950415	243905	369070	686645	912030	169770	0.782723	fail	fail
Q4J6F7	3494400	3571700	1984900	2117800	2557900	2906800	2296900	2385000	2168200	2162200	1606100	1880600	1557800	1650000	2649700	2743200	1418900	1730700	2068300	3137400	2454800	2331900	2263600	2394500	1757500	2170600	1661200	1607600	1538700	1361200	1934600	2582400	2070900	2491200	1838200	2086700				Q4J6F7	3533050	2051350	2732350	2340950	2165200	1743350	0.0442206	fail	pass
Q4J6G0	257560	315630	0	0	15144	53921	0	0	525520	525030	0	63475	111950	51257	0	115670	209020	281340	0	0	0	74432	276660	0	213740	61372	71343	108750	229690	234520	82873	104780	87636	125110	381190	367570				Q4J6G0	286595	0	34532.5	0	525275	31737.5	0.53503	fail	fail
Q4J6G1	0	0	0	0	0	0	0	0	0	0	0	0	0	0	0	0	0	0	0	0	0	0	0	0	0	0	0	0	0	0	0	0	0	0	0	0				Q4J6G1	0	0	0	0	0	0	#DIV/0!	#DIV/0!	#DIV/0!
Q4J6G2	2079000	2607500	1436700	1451000	1944400	2231600	1859400	1706800	2322300	2251900	1324800	1344400	1619500	1423800	1766500	1738500	1593300	1790900	1881800	1897400	1916700	1820900	1798500	1564000	1870100	1840500	1754300	1312800	1456900	1636600	1877300	1833000	1796400	1616100	1790300	1736300				Q4J6G2	2343250	1443850	2088000	1783100	2287100	1334600	0.55365	fail	fail
Q4J6G3	123230	108810	280080	217760	135670	210440	119030	129490	200280	144180	284300	295820	248250	113850	228100	0	230650	252650	170780	127730	280000	252540	286950	250420	224510	123660	240080	129150	164780	262210	328370	345760	129400	137990	277660	172430				Q4J6G3	116020	248920	173055	124260	172230	290060	0.709374	fail	fail
Q4J6G4	210530	348600	784790	803270	602210	825600	1325500	1218000	460740	624470	863370	1118600	491390	266220	0	484470	1354100	1208700	532930	298960	1369600	839260	1526400	1312800	693360	956020	646320	614350	1351900	727180	790680	707730	681740	0	1362600	1228100				Q4J6G4	279565	794030	713905	1271750	542605	990985	0.0834039	fail	fail
Q4J6G5	503360	287970	351160	396230	679540	536310	894300	458350	835700	590210	604090	1533900	945190	797770	847460	889350	790240	398660	458120	570430	529430	272850	712920	264700	799220	849560	756480	585180	527300	1074200	388450	224330	724730	506330	796290	398180				Q4J6G5	395665	373695	607925	676325	712955	1068995	0.0576036	fail	fail
Q4J6G6	0	0	0	0	0	0	0	0	0	0	0	0	0	0	0	0	0	0	0	0	0	0	0	0	0	0	0	0	0	0	0	0	0	0	0	0				Q4J6G6	0	0	0	0	0	0	#DIV/0!	#DIV/0!	#DIV/0!
Q4J6G8	0	0	0	0	0	0	0	0	0	0	0	0	0	0	0	0	0	0	0	0	0	0	0	0	0	0	0	0	0	0	0	0	0	0	0	0				Q4J6G8	0	0	0	0	0	0	#DIV/0!	#DIV/0!	#DIV/0!
Q4J6G9	1092000	1067300	596150	580360	850290	740730	663720	763550	698940	707670	599640	522380	952280	789690	1026300	968550	584910	535340	852340	941370	813180	704900	748860	688150	860570	876920	601010	419310	537000	598970	367330	378390	922220	908270	648080	602430				Q4J6G9	1079650	588255	795510	713635	703305	561010	0.129022	fail	fail
Q4J6H0	0	0	514130	424570	253000	0	577780	463920	0	162340	157080	77869	296450	415540	504880	0	172790	0	363520	290310	261360	0	329780	536800	0	0	0	0	0	0	0	0	0	0	0	0				Q4J6H0	0	469350	126500	520850	81170	117474	0.763496	fail	fail
Q4J6H1	0	84615	99980	133200	119450	133670	66037	0	73552	33211	71327	92393	92108	40825	52087	256960	55346	46131	66404	61842	140470	141750	96093	76030	80210	0	105580	96186	100530	58887	179880	183350	0	0	158800	148510				Q4J6H1	42307.5	116590	126560	33018.5	53381.5	81860	0.145122	fail	fail
Q4J6H2	0	0	0	0	0	0	0	0	0	0	0	0	0	0	0	0	0	0	0	0	0	0	0	0	0	0	0	0	0	0	0	0	0	0	0	0				Q4J6H2	0	0	0	0	0	0	#DIV/0!	#DIV/0!	#DIV/0!
Q4J6H3	78310	50798	269550	133400	117360	229830	102670	217820	244260	189100	166140	168790	163320	0	180550	0	96412	265330	65940	0	164650	0	132460	0	0	0	0	0	91023	208260	0	0	0	0	143940	204720				Q4J6H3	64554	201475	173595	160245	216680	167465	0.407053	fail	fail
Q4J6H4	257820	138810	141520	256020	192700	353430	152530	273130	156970	177850	172700	235550	132250	192140	595210	290300	205070	250990	183630	0	0	322150	178610	228960	120240	229920	320590	360670	171650	315940	208760	195200	376800	396700	159200	315120				Q4J6H4	198315	198770	273065	212830	167410	204125	0.480823	fail	fail
Q4J6H5	142870	196480	185470	202450	236910	258520	142840	127170	68222	85089	118500	159620	313720	289910	335530	423320	201450	199750	455620	565890	249170	274200	259480	267720	357200	419950	378890	359090	217500	203240	213550	307850	332380	480670	261430	372310				Q4J6H5	169675	193960	247715	135005	76655.5	139060	0.0025357	pass	pass
Q4J6H6	23931	55045	75927	77477	111100	114230	48675	61750	35462	33926	76482	90601	191950	130420	161310	152040	113890	114290	216370	286550	160150	182200	102860	115420	169600	166680	168810	137140	130260	123000	119050	146530	114820	156890	141940	169650				Q4J6H6	39488	76702	112665	55212.5	34694	83541.5	0.296597	fail	fail
Q4J6H7	0	0	0	0	0	0	0	0	0	0	0	0	0	0	0	0	0	0	0	0	0	0	0	0	0	0	0	0	0	0	0	0	0	0	0	0				Q4J6H7	0	0	0	0	0	0	#DIV/0!	#DIV/0!	#DIV/0!
Q4J6H8	516860	529750	485860	469770	426950	488050	414080	350480	486000	472290	425490	394170	391260	317730	338120	328640	277510	278430	314470	397640	374900	366120	343340	307330	447910	498540	526890	477570	312960	318120	402490	467770	320700	370170	382730	411820				Q4J6H8	523305	477815	457500	382280	479145	409830	0.0331461	fail	pass
Q4J6H9	7054700	6233900	6733800	6792700	6399900	7806100	6763600	6070400	6213900	6057900	6275600	6578700	5804800	4872100	4513100	4615200	4277300	4693300	5416400	4909900	5784200	5787600	5761600	5268100	6780200	6318200	6768900	5733300	5208100	4823700	6485400	6633800	5431300	5419900	5945100	5729800				Q4J6H9	6644300	6763250	7103000	6417000	6135900	6427150	0.0739886	fail	fail
Q4J6I0	5771100	5502700	3895600	3606100	3184600	3143600	4285400	3812000	3786300	3357100	3595100	2949400	4365100	3660200	3985400	3549000	2873300	2334700	4278400	4004600	2963000	2536600	3483100	3158300	5193900	4844000	5045200	3747800	2650900	2537900	3522900	3210000	5652600	4438000	3737700	3526200				Q4J6I0	5636900	3750850	3164100	4048700	3571700	3272250	0.30301	fail	fail
Q4J6I1	703410	793580	622840	519340	559450	675890	541380	523700	712800	1538500	735230	598900	634450	521890	1013400	1325900	692950	692020	262020	986550	469980	658970	678590	540860	955800	1252900	811220	808810	759240	930930	808210	943100	1315000	1401200	808180	881590				Q4J6I1	748495	571090	617670	532540	1125650	667065	0.443168	fail	fail
Q4J6I3	0	66519	73458	75230	65021	47032	41542	27836	0	57105	43428	63898	0	77284	82407	18783	0	0	0	117410	111430	74508	0	93497	0	98199	89668	64584	66513	72777	0	86501	0	90794	102220	105410				Q4J6I3	33259.5	74344	56026.5	34689	28552.5	53663	0.321501	fail	fail
Q4J6I5	29493	0	83106	70399	68489	79459	85812	73931	61057	67247	36783	65474	59617	0	18712	0	61680	70168	43863	47484	85850	73508	90525	83232	63903	36939	150780	72773	78744	57644	128320	94861	109290	0	94488	94871				Q4J6I5	14746.5	76752.5	73974	79871.5	64152	51128.5	0.526324	fail	fail
Q4J6I7	56753	106860	121500	107180	255480	225050	0	0	77427	52334	32182	22262	0	0	0	0	68892	35618	126920	158670	87098	149550	124890	147210	146410	114780	121730	95753	0	45742	151770	154080	75327	157410	106980	120000				Q4J6I7	81806.5	114340	240265	0	64880.5	27222	0.00692101	pass	pass
Q4J6I8	3807200	3750100	3573700	3351900	3571400	4084000	3345700	2720800	3660200	3433900	3225800	3518600	4182700	3141000	3348500	3573700	3126400	3414100	4212100	3911800	4225600	4245600	4402600	3848500	3190000	2700700	3839900	2656600	3272200	3451800	4065500	3956000	2840900	3261500	3457800	3276700				Q4J6I8	3778650	3462800	3827700	3033250	3547050	3372200	0.0515808	fail	fail
Q4J6I9	5613000	5954300	5168200	5482200	4208500	4352200	4577900	4491600	5284300	4932700	4672700	4487400	5781500	5013100	6156500	6946600	4083000	4187200	4982000	6186500	4993000	5521100	5697600	5325000	5267500	6501200	4859000	4469800	4161100	4200300	5406800	5844900	5611900	6221900	4753200	4942600				Q4J6I9	5783650	5325200	4280350	4534750	5108500	4580050	0.2459	fail	fail
Q4J6J0	128020	144870	73048	93565	82839	118520	79072	94045	55471	85429	79617	98023	95081	90153	95152	164110	78312	74194	71243	93209	98140	107870	91208	108180	78659	128120	80258	89477	80256	86630	121790	119880	158900	111360	93551	113410				Q4J6J0	136445	83306.5	100680	86558.5	70450	88820	0.0844581	fail	fail
Q4J6J3	545790	474590	272990	322390	402030	357940	351430	308600	299150	386650	404830	328440	420640	350500	555090	586730	296150	234870	383340	470790	418640	266830	237150	305610	498670	680790	432660	359580	287800	269400	524390	375010	616690	554060	337650	338170				Q4J6J3	510190	297690	379985	330015	342900	366635	0.293665	fail	fail
Q4J6J4	2975200	3039500	2824500	2934400	3077300	3269400	3433700	3071000	2499100	2537400	3171200	3188400	3651500	3357500	4207000	4318700	2857200	3107900	3198200	3853500	3401700	3282800	3451600	3282200	3870500	4253900	3669700	3192500	3160400	2897700	3729400	3771000	3719400	3791600	3584600	3632600				Q4J6J4	3007350	2879450	3173350	3252350	2518250	3179800	0.830804	fail	fail
Q4J6J5	2462400	2596200	2696400	2686000	2703300	2995600	2547200	2252100	2847200	2544500	2383200	2371200	2476400	2127700	2260100	2059900	2289400	2367900	3095100	2639200	3236600	3126600	3293500	2766100	2221800	2156600	2351100	1717800	2212100	2200000	2448500	2536700	1808200	2333600	2639400	2383000				Q4J6J5	2529300	2691200	2849450	2399650	2695850	2377200	0.103351	fail	fail
Q4J6J6	265570	129610	321680	432500	483140	464280	412830	538800	432180	388590	508580	508200	412260	408520	91943	142460	399990	522060	266750	206720	602560	546700	628850	553590	215790	196320	454260	388790	593990	585230	457670	295520	29968	0	440290	504740				Q4J6J6	197590	377090	473710	475815	410385	508390	0.0894085	fail	fail
Q4J6J7	0	0	0	10074	0	21573	0	16892	49168	41650	0	35763	0	0	0	0	48255	33273	0	0	13842	16018	21228	0	0	0	28949	34758	35899	29288	13666	0	0	0	10434	0				Q4J6J7	0	5037	10786.5	8446	45409	17881.5	0.0771719	fail	fail
Q4J6J8	299950	256750	612460	597600	704770	799760	649750	639930	435120	394540	799330	836510	824410	669760	567570	428310	851000	861210	688730	608540	835300	880380	835970	790120	608090	607140	827320	570110	896170	937750	894820	883900	464810	466980	808160	661030				Q4J6J8	278350	605030	752265	644840	414830	817920	0.503937	fail	fail
Q4J6J9	184440	313590	251640	332170	252250	533740	230360	332700	207300	310360	288410	410480	239630	348140	529090	736240	220620	452680	108210	368130	94463	398830	142320	335850	162280	382060	254210	347250	239100	440070	290390	400260	233450	400040	116920	301540				Q4J6J9	249015	291905	392995	281530	258830	349445	0.804092	fail	fail
Q4J6K0	839330	407660	600050	485580	475520	836440	803860	887710	520670	582850	835860	839330	887150	1309800	1386900	1261700	1434600	858620	1052300	722820	850970	1129500	1041200	887470	928720	451790	747460	466630	449990	733640	700250	395120	395510	464620	399890	401470				Q4J6K0	623495	542815	655980	845785	551760	837595	0.196065	fail	fail
Q4J6K1	2831900	2253800	1288700	1274800	1056100	1568200	1308600	1059400	1275000	1285100	1368000	1447600	1725500	1509800	2411000	2595500	962530	888840	1576200	1699400	1207200	1054800	1291700	1219100	1776400	2070100	1820300	1701100	1125200	1170000	1388200	1428600	2351600	2299000	1432500	1412900				Q4J6K1	2542850	1281750	1312150	1184000	1280050	1407800	0.171167	fail	fail
Q4J6K2	1317500	606500	521520	868990	932910	1698400	2021600	1686200	1116500	842040	1510300	1317500	1599700	2346500	1862000	784250	881230	1837400	1945600	1024200	1016800	2188000	1921900	2441800	1923600	817960	849380	1073100	711670	1470700	1091100	1117200	911410	604270	368180	1044600				Q4J6K2	962000	695255	1315655	1853900	979270	1413900	0.119837	fail	fail
Q4J6K3	161670	191590	266070	239490	534670	609230	604560	629220	518210	401700	546510	521720	644970	406320	231890	210760	1056100	999520	320920	180390	633900	476230	489290	426240	150850	84064	249120	147020	507830	503400	297570	269340	110690	201810	241790	219270				Q4J6K3	176630	252780	571950	616890	459955	534115	0.0360909	fail	pass
Q4J6K4	1494800	1230100	1205900	1090500	1710800	1474600	1565200	1414900	1179100	1194600	1321700	1198500	1465000	1061300	1119100	836040	1276900	1271800	1241800	953310	1409100	1367900	1550500	1290600	1538200	1338400	1412700	878100	1322400	1337900	1559100	1277200	1077100	876280	1330300	1175200				Q4J6K4	1362450	1148200	1592700	1490050	1186850	1260100	0.635658	fail	fail
Q4J6K5	1108500	1231100	1513200	1410000	2325300	2843300	2097300	1770200	1388100	1265600	1437000	1638800	1965200	1639300	1968500	1866000	1445400	2111800	1803200	1629400	2240900	2064400	2162000	1903400	1938600	1758900	1674300	1576100	1659000	1661400	1675500	1746400	1549900	1030700	2075100	1805800				Q4J6K5	1169800	1461600	2584300	1933750	1326850	1537900	0.660871	fail	fail
Q4J6K6	0	0	269800	230430	194550	256180	248260	213210	212210	190870	117400	252290	175730	0	0	158390	105280	311410	0	294490	24832	271510	354430	286340	0	439080	0	253930	121070	281040	221070	333050	0	0	196170	312840				Q4J6K6	0	250115	225365	230735	201540	184845	0.410748	fail	fail
Q4J6K7	1459700	1793000	1957500	1904000	1824900	1891800	2230100	2178700	1625000	1485700	1839000	1679600	1749500	1788100	1972400	1937500	1481500	1522300	1451900	2022200	2196000	1880100	1980100	1927100	1823700	2094900	1761500	1866400	1690600	1556900	1955100	1897400	1720400	2309300	1947500	1648100				Q4J6K7	1626350	1930750	1858350	2204400	1555350	1759300	0.815704	fail	fail
Q4J6K8	553220	558480	816780	831760	875400	864170	861380	795220	847990	779960	1124200	1089400	1227900	1049600	1041800	993930	844830	908840	1025700	1012400	1251800	1048600	1009700	977110	667800	679780	697480	541390	945390	996370	513940	508490	768460	432850	820140	744710				Q4J6K8	555850	824270	869785	828300	813975	1106800	0.0862387	fail	fail
Q4J6K9	5856900	4359300	5956700	5560000	6759300	7093100	7341500	6504700	5695000	5608200	5777800	5698200	6542000	5899700	7446600	6412100	5179700	6760300	6479800	6019800	6511500	6261500	6857400	6367600	7211800	6947200	7122500	6039700	6056200	6370300	7143200	7015200	6657100	4299200	6540900	6617600				Q4J6K9	5108100	5758350	6926200	6923100	5651600	5738000	0.72765	fail	fail
Q4J6L0	5865200	5414600	4265400	3885100	3647800	3520000	4220100	4270300	3608100	3536500	3999900	3365100	5121800	4705800	4983800	5499900	3300600	3248200	5324300	5739800	4044000	3715100	4866300	4014700	5166800	5316100	4785900	3859100	3440100	2917100	4071600	3802500	6419100	5962000	4143100	3601300				Q4J6L0	5639900	4075250	3583900	4245200	3572300	3682500	0.192323	fail	fail
Q4J6L2	1123900	1310300	979800	1047500	954240	1246900	865500	987080	910190	894580	966440	1068500	1168200	1069700	1418900	1659200	653900	955360	1471600	1448100	1233700	1300700	1369200	1277400	1322900	1543800	1187400	1093000	847030	948240	884400	1114700	1522100	1424300	1155300	1229700				Q4J6L2	1217100	1013650	1100570	926290	902385	1017470	0.0347679	fail	pass
Q4J6L3	2032100	2612500	1663200	1874500	1330600	1518400	1333800	1409900	1837200	1815200	1712500	2151500	1929700	1854000	2224200	3039400	1344500	1786000	1713200	2373600	1790800	2084200	1569200	2041200	2487900	2814600	1980900	1994400	1949900	1865700	2536200	2673400	2654800	2762500	1950300	2132700				Q4J6L3	2322300	1768850	1424500	1371850	1826200	1932000	0.575951	fail	fail
Q4J6L4	8435600	7821400	1384400	791020	1812000	1705800	1925100	1901500	5457000	5198800	1536000	827490	1435700	1236700	1472400	1432900	1174200	832350	83401	1351800	1152300	1020000	1217900	1033800	1488500	1388400	1273500	958010	1126300	873950	1217600	1054100	1602700	1522000	1674200	1399300				Q4J6L4	8128500	1087710	1758900	1913300	5327900	1181745	0.615131	fail	fail
Q4J6L7	9828400	7100300	14662000	15562000	16051000	16484000	16108000	15619000	18317000	17284000	12963000	15023000	14070000	10418000	5388000	4950900	13953000	17885000	14145000	12923000	18216000	17504000	21572000	18272000	10318000	6575000	11933000	8054000	11902000	11721000	16301000	15261000	4155500	2765100	14280000	13505000				Q4J6L7	8464350	15112000	16267500	15863500	17800500	13993000	0.168711	fail	fail
Q4J6L8	7732300	6080700	2403900	2871700	2815100	2649000	3622400	4108500	4253200	4627200	2361300	2326800	4746200	3836200	3786800	4643400	2654700	2126400	5600400	4561500	2304100	2780700	3733400	3413200	4189500	4732900	6223900	4735800	2701300	2370300	3555000	4007700	4580800	5253100	3491000	3777100				Q4J6L8	6906500	2637800	2732050	3865450	4440200	2344050	0.600377	fail	fail
Q4J6L9	3847500	3439500	2258600	2376000	2897500	3071100	2438800	2403900	2574600	2948800	2283000	2633600	3197000	3305000	4538500	4986900	2841500	2735100	3602300	3811000	2818700	2677200	2866700	2827000	3865700	4182000	3851700	3036700	2738400	3108900	3277500	3093700	4287400	4291000	3016600	2969000				Q4J6L9	3643500	2317300	2984300	2421350	2761700	2458300	0.134407	fail	fail
Q4J6M1	1211200	2071200	2115900	1928600	1458900	1424800	1767900	1504100	2092900	1868500	1615800	1684100	2198400	1782300	1525200	1838400	1443600	1737700	1942100	1870900	1812800	2209300	2094400	2191400	1784100	2120400	1478500	1566300	1630200	1604200	1712200	1749700	1015200	1935600	1953800	2129300				Q4J6M1	1641200	2022250	1441850	1636000	1980700	1649950	0.768708	fail	fail
Q4J6M2	1763100	2225000	1710300	1482300	2414300	2421500	2333100	1982000	2421800	1822800	1661200	1814800	1597400	1276600	1340400	1363600	2078900	1989500	1650500	1332500	2270900	1802600	2631600	1997200	1991100	1543600	1636000	905270	1842300	1454200	2167300	1842400	1441300	1244600	2221600	2028000				Q4J6M2	1994050	1596300	2417900	2157550	2122300	1738000	0.987932	fail	fail
Q4J6M3	10014000	9805900	10009000	9998500	9986200	10349000	12054000	10377000	7299000	7399000	10205000	9663200	14367000	12108000	15068000	14430000	8991800	8965900	13552000	14302000	11548000	11708000	12050000	11338000	13513000	13801000	12295000	9457000	10753000	9543900	8649300	8506700	14525000	15359000	11253000	10028000				Q4J6M3	9909950	10003750	10167600	11215500	7349000	9934100	0.502199	fail	fail
Q4J6M4	28017000	29158000	15550000	17809000	21205000	21427000	16842000	17647000	18716000	16883000	15845000	17053000	24727000	19993000	21911000	22748000	11874000	13817000	25067000	28625000	17882000	20417000	18271000	20859000	15451000	17206000	15064000	13455000	15215000	15399000	11535000	12615000	18276000	17040000	14715000	16146000				Q4J6M4	28587500	16679500	21316000	17244500	17799500	16449000	0.049402	fail	pass
Q4J6M5	2952100	3660300	4762300	4419900	4975700	6078100	5602900	4985900	3171400	3328000	4778300	4714800	5563100	5692300	5431800	5260800	3477800	3906900	5988700	6371400	4987000	5226900	4486300	5113900	4172100	4469800	3168800	3058900	4738400	4280500	3348700	3187500	4170200	5212900	3448700	3638700				Q4J6M5	3306200	4591100	5526900	5294400	3249700	4746550	0.941709	fail	fail
Q4J6M6	7740200	7241000	7178500	7574800	7566500	8637000	8791700	7845000	5577100	5966500	7261500	7379200	9859500	9289900	11232000	13420000	6836300	7236300	10478000	10979000	8520400	8422300	7743400	8661500	9303000	9199700	8080300	6958300	7179500	7898200	5946800	6263200	11889000	11792000	7420500	6985500				Q4J6M6	7490600	7376650	8101750	8318350	5771800	7320350	0.352127	fail	fail
Q4J6M7	4862300	5182600	3535700	3908700	2353700	2711200	2605500	2300100	3985900	3844300	2853400	2965700	3537700	3094300	4352300	4402400	2479900	2844600	3809500	4289300	3801300	3980200	4302000	3979900	4075600	4144700	3631500	3247200	2773900	2972100	4194600	4038400	4181500	4218400	3380300	3415100				Q4J6M7	5022450	3722200	2532450	2452800	3915100	2909550	0.243844	fail	fail
Q4J6M8	1231900	1287500	869370	663110	614970	1045900	563390	536120	783180	803670	589310	559730	1034100	898530	1184300	1172000	700030	730760	1597900	1558900	1611500	1471400	1659800	1434900	1348500	1403600	1200500	987770	608630	768050	1400900	1431000	1363100	1415100	1358400	1358000				Q4J6M8	1259700	766240	830435	549755	793425	574520	0.0324008	fail	pass
Q4J6M9	200580	63299	101970	77870	54693	66443	0	0	0	0	0	0	0	0	20990	0	0	41409	0	0	93474	89272	84387	98035	0	0	0	0	0	35153	75033	0	0	0	154690	97188				Q4J6M9	131940	89920	60568	0	0	0	0.00177146	pass	pass
Q4J6N0	0	0	10691	0	18715	17065	0	0	0	0	38211	0	0	0	0	0	52156	27834	0	0	50829	22877	0	0	0	0	0	0	0	30834	0	0	0	0	0	0				Q4J6N0	0	5345.5	17890	0	0	19105.5	0.854811	fail	fail
Q4J6N5	257850	244510	191340	199950	115910	195160	108920	156890	198600	189980	150110	259470	358270	330770	289300	286250	241180	349920	290320	305010	188220	182070	176180	205650	760910	856250	624470	576570	347630	275320	407170	468130	548510	522860	516970	519100				Q4J6N5	251180	195645	155535	132905	194290	204790	0.441412	fail	fail
Q4J6N9	2950300	2834700	2166300	2345400	2207500	2563500	2772200	2381300	2967300	2810900	2137900	2067400	3336500	2628300	2267900	2531900	2443700	2368800	2821700	2609500	2625700	2648000	2971100	2573700	3228300	2919300	3004200	2271800	2238400	2101100	2793600	2692100	2213000	1910100	2811900	2457000				Q4J6N9	2892500	2255850	2385500	2576750	2889100	2102650	0.956118	fail	fail
Q4J6P1	831610	789790	499790	569640	518170	615640	389140	416870	587520	571860	501340	453360	806500	705230	879520	841790	487870	556490	608540	649090	616100	624230	490430	532390	786480	917310	653280	592030	469750	606470	614860	757100	731970	846910	590200	797420				Q4J6P1	810700	534715	566905	403005	579690	477350	0.0465518	fail	pass
Q4J6P2	1458200	1471300	571730	628020	739390	860420	818420	778170	669600	775860	442780	474690	504630	524280	551120	752450	360260	364520	598830	722250	582280	552360	573360	605050	636800	824760	634060	652980	385160	349520	631120	650060	847330	902470	459920	462690				Q4J6P2	1464750	599875	799905	798295	722730	458735	0.130787	fail	fail
Q4J6P3	1679400	1744300	797840	841340	1103600	1226800	1373000	1173800	1451500	1389000	762680	723380	1021800	853220	1158800	1221200	692610	832880	1061400	1045000	979620	1003200	931190	967240	1133100	1154000	1139800	973620	793190	846250	1134200	1210600	1247100	1238600	878810	837220				Q4J6P3	1711850	819590	1165200	1273400	1420250	743030	0.691575	fail	fail
Q4J6P4	678190	833590	326710	321950	539290	508980	239840	427280	403420	497030	163200	173560	303510	298440	434630	499280	199020	147870	255430	486050	327720	462750	363370	437670	328340	415110	338170	331130	178160	235560	369830	415340	524400	614090	213890	265190				Q4J6P4	755890	324330	524135	333560	450225	168380	0.0552556	fail	fail
Q4J6P5	393250	426750	352130	346320	546030	590770	467620	388410	329960	341400	220930	225840	212970	112190	153760	117090	185270	235030	289980	322830	349330	375250	396660	345180	116310	100900	180450	129780	208270	170060	335270	313720	233400	248460	110500	116160				Q4J6P5	410000	349225	568400	428015	335680	223385	0.0751248	fail	fail
Q4J6P6	2567400	2657700	2227100	2035600	1679000	1918900	2418400	1093600	1970400	2219000	1773000	2567400	1932900	2057800	881880	3410200	3535400	3010000	2569200	2111300	2154400	2029800	2298500	1668300	1673900	1443700	2206600	2065700	1758800	3407900	2723800	2444500	2163500	3019400	2123900	2222500				Q4J6P6	2612550	2131350	1798950	1756000	2094700	2170200	0.52938	fail	fail
Q4J6P7	0	130990	13469	0	0	0	0	0	0	0	0	39190	28493	68211	111160	0	0	20580	0	89457	0	0	0	0	0	72232	16446	0	29427	0	27767	74131	0	176960	0	44325				Q4J6P7	65495	6734.5	0	0	0	19595	0.452922	fail	fail
Q4J6P8	754030	738710	729600	762000	679700	865800	560690	681000	692010	768930	788950	900440	930370	825510	896760	937240	722380	839780	906220	941730	782350	846260	783220	800720	866380	935390	936140	831640	874810	895280	955210	1022200	663300	914900	794690	802840				Q4J6P8	746370	745800	772750	620845	730470	844695	0.676009	fail	fail
Q4J6P9	484380	607820	535720	645300	481210	671200	472170	567420	527770	524320	663750	718770	659550	490060	603810	669830	479990	620240	624180	564880	520760	684100	608490	632860	588280	581190	645020	467310	598280	696570	716660	788960	567010	756290	577130	621770				Q4J6P9	546100	590510	576205	519795	526045	691260	0.876712	fail	fail
Q4J6Q0	83813	62594	176590	194130	170040	215260	197670	171810	125700	73264	213920	223840	295050	226960	226190	196450	219980	250850	280590	241320	267460	262210	284530	239560	248810	269990	235860	187490	230550	211820	295150	287510	165510	116180	269050	254570				Q4J6Q0	73203.5	185360	192650	184740	99482	218880	0.629402	fail	fail
Q4J6Q1	1595700	2022400	2583500	2840200	3039000	3122900	2816100	2693600	2074600	2243800	3162500	3441300	3280400	2807400	3402300	3007500	2127000	2610500	2848700	3591300	3350000	3240500	2859600	2769400	2772700	3256900	2889600	2761200	2862200	3313000	2230800	2396800	1822800	2998700	2844800	2793300				Q4J6Q1	1809050	2711850	3080950	2754850	2159200	3301900	0.545313	fail	fail
Q4J6Q2	422720	420870	381370	421670	441050	537730	444040	315750	403320	353440	359500	428440	395800	320980	474850	377580	282750	308570	420150	304130	406540	402610	387180	401710	329940	324560	349040	238020	402450	348860	429650	474320	447290	452760	373610	363110				Q4J6Q2	421795	401520	489390	379895	378380	393970	0.0998519	fail	fail
Q4J6Q3	2710600	1524700	2353400	2188600	3409100	3940100	3147200	3410200	1888600	1772100	3227200	3221400	4987200	3533100	5223100	5310200	3846200	3689100	4627900	4262700	4286500	3613100	4584400	3876800	4668100	3719500	4190400	3297100	4290600	4121700	4266100	4555000	4525100	3672300	4605500	3397400				Q4J6Q3	2117650	2271000	3674600	3278700	1830350	3224300	0.850953	fail	fail
Q4J6Q4	0	407210	0	379850	0	581790	1096900	910910	1156900	0	1486300	912730	460580	0	0	0	1753300	0	0	0	1174900	795430	552980	0	0	0	0	0	1530200	1066800	297680	248810	0	0	0	400430				Q4J6Q4	203605	189925	290895	1003905	578450	1199515	0.0125413	fail	pass
Q4J6Q5	262430	192070	543290	395620	454090	473630	363770	471950	374610	318820	519380	535920	258190	362490	273010	126140	367640	403610	302310	338090	380920	488320	556000	387010	385100	225990	149740	72633	530180	574820	95163	59294	148210	173850	272120	320830				Q4J6Q5	227250	469455	463860	417860	346715	527650	0.521312	fail	fail
Q4J6Q8	0	0	0	0	0	0	0	0	0	0	0	0	0	0	0	0	0	0	0	0	0	0	0	0	0	0	0	0	0	0	0	0	0	0	0	0				Q4J6Q8	0	0	0	0	0	0	#DIV/0!	#DIV/0!	#DIV/0!
Q4J6Q9	12363	69350	157500	165500	262660	396620	369170	412360	44785	86322	168510	209010	304140	330370	440730	483240	199050	231120	151030	201640	154550	115230	155130	203110	186330	192280	149460	201640	249810	218140	152970	210580	167970	312130	133280	182390				Q4J6Q9	40856.5	161500	329640	390765	65553.5	188760	0.658312	fail	fail
Q4J6R0	0	0	45165	0	0	0	0	0	0	29763	0	0	83673	0	114360	0	44324	0	96531	24157	13765	0	0	0	97917	0	82815	0	0	0	62707	0	121430	0	0	0				Q4J6R0	0	22582.5	0	0	14881.5	0	0.781647	fail	fail
Q4J6R1	27731	53537	115490	124300	201900	271020	261180	252550	72160	73086	292690	277930	399920	350840	384030	377510	263230	293450	153880	186400	172170	163150	150400	166530	186240	208320	198720	173420	306070	322980	197600	195940	166200	189800	128430	134490				Q4J6R1	40634	119895	236460	256865	72623	285310	0.226123	fail	fail
Q4J6R2	1473400	1252200	2372200	2195700	1891800	1697300	2205400	1819800	1131800	1062800	2523100	2331600	3654300	3004200	3041300	2364500	2643600	2536600	2833400	2996600	3110600	2623500	2883700	2921900	2791400	2538900	2828000	2523100	3053200	2846900	3172700	3227600	2513000	2482700	2427600	2016600				Q4J6R2	1362800	2283950	1794550	2012600	1097300	2427350	0.919492	fail	fail
Q4J6R3	699440	638650	1303100	1252600	1215200	1173000	1220300	1132000	799880	681640	1546600	1474500	2002800	1656600	1864300	1999100	1732000	1875000	1557400	1648100	1783400	1634200	1473900	1498800	1290700	1511200	1576500	1289700	1718300	1665200	1846200	1880800	1463900	1602100	1333900	1419600				Q4J6R3	669045	1277850	1194100	1176150	740760	1510550	0.620685	fail	fail
Q4J6R4	644540	717250	1168200	1313900	1100800	1466500	1080500	995250	485640	508410	1296500	1593500	1952500	1713100	2277400	2242100	1353800	1837900	1531600	2191700	1489500	1896000	1318800	1614300	1260900	1409200	1061400	1246800	1627100	1691200	1773600	2073300	1291600	1729100	1164000	1342000				Q4J6R4	680895	1241050	1283650	1037875	497025	1445000	0.742277	fail	fail
Q4J6R5	840530	840780	1113100	1015400	765040	770530	999650	963100	527890	515910	1338000	1062300	2312700	1770700	1910400	1909200	1355900	1211400	1708200	1671600	1236300	1144200	1470100	1219000	1718000	1419800	1546700	1185100	1320600	1140300	1539100	1504000	1775500	1539700	1060100	972280				Q4J6R5	840655	1064250	767785	981375	521900	1200150	0.944517	fail	fail
Q4J6R6	405110	486380	353460	337390	478670	583350	407560	517270	533960	530510	442420	557430	539600	472540	826760	785180	376560	574190	363290	527030	426950	502140	359870	381960	563310	714920	518890	490490	375100	487590	426140	459590	387140	415060	401250	510370				Q4J6R6	445745	345425	531010	462415	532235	499925	0.231166	fail	fail
Q4J6R7	897300	809270	933490	973300	1236300	1401800	1057600	876510	1084100	931240	1103600	1059500	1207100	1031200	1393100	1002400	931320	1083400	1155500	1239700	1176500	1034300	1232800	1170300	964710	973400	1053800	801580	1065000	1004400	1240900	1308200	766480	747870	1011200	870310				Q4J6R7	853285	953395	1319050	967055	1007670	1081550	0.82197	fail	fail
Q4J6R8	0	199970	186480	192080	244120	399010	270630	375870	269890	322240	234290	365590	286810	231700	502810	631210	285540	390690	274460	139250	320400	415430	352400	278350	168060	375420	129660	234220	256720	321770	274560	274190	0	227850	280400	262640				Q4J6R8	99985	189280	321565	323250	296065	299940	0.102427	fail	fail
Q4J6R9	5494000	7459500	4236800	4407800	11163000	11653000	12944000	14067000	7366200	6079800	4894200	4330700	5584300	5668300	7859600	5571200	5975100	5985900	5078600	6542700	4840200	4673100	5198000	5564000	3612700	3133200	4206600	3987900	4696400	4065000	4907200	4452200	4466200	4272100	2517400	2866500				Q4J6R9	6476750	4322300	11408000	13505500	6723000	4612450	0.695868	fail	fail
Q4J6S0	557840	623640	601210	533480	3208300	3701800	4480900	3583700	726180	649910	1050800	1002000	1463300	1339900	2089100	2155200	1152700	1307700	986350	1031800	765770	712230	921110	820720	1340600	1418800	1157500	1002800	811720	833830	670630	673290	1165700	1075700	872800	843560				Q4J6S0	590740	567345	3455050	4032300	688045	1026400	0.688349	fail	fail
Q4J6S1	0	0	0	0	177200	154330	297030	251920	0	0	47725	0	0	0	0	0	0	105500	0	0	0	0	0	0	0	0	0	0	0	0	0	0	0	0	0	0				Q4J6S1	0	0	165765	274475	0	23862.5	0.519626	fail	fail
Q4J6S2	150200	235110	316190	385190	1433200	1571100	1239400	1521500	357310	342810	548740	634460	661520	626350	845150	779450	598560	791810	480080	402210	498680	542940	514970	552080	611720	633700	521640	483660	596850	625230	518060	522550	423050	557210	493750	559570				Q4J6S2	192655	350690	1502150	1380450	350060	591600	0.78554	fail	fail
Q4J6S4	0	0	0	0	0	0	0	0	0	0	0	0	0	0	0	0	0	0	0	0	0	0	0	0	0	0	0	0	0	0	0	0	0	0	0	0				Q4J6S4	0	0	0	0	0	0	#DIV/0!	#DIV/0!	#DIV/0!
Q4J6S5	28898	49329	54594	38854	781560	821730	1212600	858900	87685	71208	182100	172360	320600	270220	324350	293550	237160	258810	131020	100880	103700	103880	116090	122890	217630	147920	190980	151350	170690	186300	106470	92016	153650	97524	121150	121840				Q4J6S5	39113.5	46724	801645	1035750	79446.5	177230	0.607042	fail	fail
Q4J6S6	393920	320840	154170	261090	458210	508600	533540	779650	358600	341840	296410	214560	707890	365890	410260	705190	296550	322870	407100	422910	119060	230900	253130	273610	397400	413200	571030	357610	274720	315440	342780	346840	463630	485580	376080	399780				Q4J6S6	357380	207630	483405	656595	350220	255485	0.488973	fail	fail
Q4J6S7	5402800	4644900	2758300	2828800	5596800	5690300	6059200	6270400	3564500	3302100	2548300	2590100	3519700	3071100	3517300	3983300	2393100	2751100	4035700	3701300	3253300	3157300	3163200	3067400	4737100	4309500	3882000	3000800	2314300	2260900	2919900	2980900	4429500	3710600	4111800	3815700				Q4J6S7	5023850	2793550	5643550	6164800	3433300	2569200	0.636108	fail	fail
Q4J6S8	120090	26134	40481	31119	32819	189360	267620	263320	62974	46601	104140	120090	206040	147430	152560	119690	102150	113810	174690	34555	17693	69662	47671	67780	27697	63570	76985	62402	76911	103710	155450	41367	56672	36557	72952	32565				Q4J6S8	73112	35800	111090	265470	54787.5	112115	0.173816	fail	fail
Q4J6S9	4603800	5240200	3318900	3682200	6988100	6879800	7398100	7167400	3335200	3943300	2961300	3063700	3629600	3463000	3989600	4210500	2761900	2932300	4212400	4839400	3050200	3835200	3287000	4252500	4334300	5206400	3851700	3495400	2397700	2688900	3560100	3981100	4664100	5309500	3367600	4202400				Q4J6S9	4922000	3500550	6933950	7282750	3639250	3012500	0.664079	fail	fail
Q4J6T0	0	0	0	0	0	0	0	0	0	0	0	0	0	0	0	0	0	0	0	0	0	0	0	0	0	0	0	0	0	0	0	0	0	0	0	0				Q4J6T0	0	0	0	0	0	0	#DIV/0!	#DIV/0!	#DIV/0!
Q4J6T1	0	0	20824	21694	119030	126750	274680	158970	17740	16306	44113	33375	93655	70442	0	0	0	25352	0	34844	0	37175	0	49680	85606	61104	58588	0	85774	28665	21724	9906.9	0	0	28799	47736				Q4J6T1	0	21259	122890	216825	17023	38744	0.402991	fail	fail
Q4J6T2	87343	79097	108460	98772	405840	566910	450290	430310	135010	113800	200210	237030	255580	252210	347540	226060	230980	287970	131340	177550	153890	168960	180150	166950	187290	210230	151660	144780	195340	217590	153580	171250	85589	135820	129340	158780				Q4J6T2	83220	103616	486375	440300	124405	218620	0.731934	fail	fail
Q4J6T5	67973	52285	98617	67195	287240	335700	386720	357870	61746	40327	168710	155880	240880	198800	177220	190070	146720	177220	119530	111710	101600	99916	134760	114310	147360	166840	192150	118880	148360	176130	94425	127910	116710	61618	105590	90816				Q4J6T5	60129	82906	311470	372295	51036.5	162295	0.591297	fail	fail
Q4J6T6	28750	40537	89206	81923	321590	399260	440540	503460	61891	75112	225430	306470	250500	237990	257790	201960	180390	308180	84303	115670	78193	136850	105490	150850	125590	146480	145050	132690	204310	253690	136960	165090	71773	119360	113120	110690				Q4J6T6	34643.5	85564.5	360425	472000	68501.5	265950	0.298433	fail	fail
Q4J6T7	0	23249	115930	111660	356280	356670	376100	331390	45106	61774	116680	174990	211560	242590	187810	235740	171750	227600	125100	75878	127490	161510	136320	180960	138480	178810	133020	160100	154040	172930	168430	209380	143480	167140	97738	139010				Q4J6T7	11624.5	113795	356475	353745	53440	145835	0.78904	fail	fail
Q4J6T8	63376	61092	156210	187560	307410	344770	304400	321530	64475	89956	192290	188540	275980	200500	169990	171800	225390	213490	173680	200560	181270	200590	204870	194190	166480	215090	210390	161370	199900	161330	244790	272880	137590	194850	188710	193000				Q4J6T8	62234	171885	326090	312965	77215.5	190415	0.91906	fail	fail
Q4J6T9	3358700	3240900	3028600	2783700	3870400	4113500	4302600	3511300	2988300	2543500	3138700	2724500	3197600	2666000	3236000	3472900	2280200	2514000	3255500	2922400	2717900	2590200	3431300	3011900	3222900	3361300	3015600	2393600	2635700	2355400	3499300	3307200	2997800	2355000	2961800	2722300				Q4J6T9	3299800	2906150	3991950	3906950	2765900	2931600	0.563757	fail	fail
Q4J6U0	0	0	0	0	0	27776	36186	35610	0	0	0	15844	0	0	14911	23792	29724	0	0	0	0	12893	0	22416	0	0	0	7687.6	17830	8613.9	0	0	0	0	4674	5564				Q4J6U0	0	0	13888	35898	0	7922	0.270128	fail	fail
Q4J6U1	22919	70161	0	0	0	0	0	0	0	0	0	0	0	0	0	0	0	0	21991	24391	0	0	57131	42344	0	0	0	0	0	0	0	0	29413	0	117830	134160				Q4J6U1	46540	0	0	0	0	0	0.209006	fail	fail
Q4J6U2	116030	227200	36004	63143	74594	99290	51412	83591	109430	100150	34703	62098	58507	58490	121820	116180	63812	105590	81491	103300	96368	114660	138890	188020	66871	114150	55224	70977	37573	63140	53810	85525	109330	199360	262650	292440				Q4J6U2	171615	49573.5	86942	67501.5	104790	48400.5	0.351782	fail	fail
Q4J6U3	370570	425620	206000	170890	258640	281880	187180	202730	356860	322280	198880	187090	157140	139320	240210	245040	251700	276750	247250	294050	297890	244380	356920	348040	236420	263070	235570	201300	240680	163780	200740	218140	211710	242000	653260	599160				Q4J6U3	398095	188445	270260	194955	339570	192985	0.412263	fail	fail
Q4J6U4	111800	133740	42973	60541	57709	82531	47768	53239	109510	110590	54228	51182	80750	81090	95702	95046	112580	140250	104170	126160	162360	142580	217750	222340	81085	106620	49972	60694	39266	48195	64179	60424	74782	75495	256040	257640				Q4J6U4	122770	51757	70120	50503.5	110050	52705	0.592039	fail	fail
Q4J6U5	0	0	0	0	0	0	0	0	0	0	0	0	0	0	0	0	0	0	0	0	0	0	0	0	0	0	0	0	0	0	0	0	0	0	0	0				Q4J6U5	0	0	0	0	0	0	#DIV/0!	#DIV/0!	#DIV/0!
Q4J6U6	4977800	6478300	2518400	2829500	4375400	5450900	4114500	4125600	3205300	3318100	2799000	2981700	3245400	3399800	5893300	6036300	3054000	3285200	4981200	5842900	3104400	4016200	3644500	4609800	3876700	4369000	3673800	3378400	2464400	3282200	3478200	3580000	5119000	5939300	3378900	4653900				Q4J6U6	5728050	2673950	4913150	4120050	3261700	2890350	0.159625	fail	fail
Q4J6U7	468690	448980	252630	292250	311750	349840	229030	262440	253030	305320	223640	271770	290380	312610	383370	431560	224480	236140	368190	473880	333620	278700	343760	320800	283150	272890	210530	208170	243420	237130	343500	365520	311910	292960	191450	200570				Q4J6U7	458835	272440	330795	245735	279175	247705	0.0282903	fail	pass
Q4J6U8	80162	483690	186230	303990	212980	546230	362620	418480	211800	137080	185900	315270	236580	297710	554180	485880	184830	341180	166170	605060	293570	473270	337060	589100	164610	197420	154860	252050	146170	245350	206630	270420	193410	302870	108370	428050				Q4J6U8	281926	245110	379605	390550	174440	250585	0.732647	fail	fail
Q4J6U9	622950	579460	573580	302130	560420	626880	763350	586030	664550	501150	738220	612220	922670	812260	909270	985510	651630	837530	766960	710920	657460	578790	766190	804460	1167200	1123400	879500	749880	660790	602790	852200	616250	999140	780950	869020	301520				Q4J6U9	601205	437855	593650	674690	582850	675220	0.148347	fail	fail
Q4J6V1	1076900	821650	1126500	952380	940280	1054400	799850	958970	1381300	1139300	1278900	1101100	958590	639430	805150	773520	799960	710270	810780	688080	1216200	980320	982100	850510	1119000	1079800	964860	743890	863200	812010	1207500	1026800	1013400	719950	1267200	1016500				Q4J6V1	949275	1039440	997340	879410	1260300	1190000	0.266683	fail	fail
Q4J6V2	0	132950	128800	117430	119110	136010	148530	126800	127120	95689	132970	131770	128200	131410	123260	0	92319	113310	141340	150860	163070	149020	149810	149970	208650	196460	64129	73276	124310	115650	84910	80222	99903	118570	174400	154470				Q4J6V2	66475	123115	127560	137665	111404	132370	0.363322	fail	fail
Q4J6V3	113410	129120	72999	69761	67613	82966	65172	54320	106540	32185	34380	26703	90916	81726	112510	118060	70840	88303	0	112590	78538	158450	95013	70237	85365	120490	101710	79816	66450	36535	123670	95792	0	0	81478	81387				Q4J6V3	121265	71380	75289.5	59746	69362.5	30541.5	0.0492783	fail	pass
Q4J6V4	1073100	1399600	1183900	1228900	2713400	2998800	1791600	1816900	823810	785820	721280	766670	1249600	1197800	1966500	1938700	1149600	1320600	2071600	2503400	1724300	1702800	1907900	1952000	2282600	2564200	1848600	1634800	907640	962690	1403900	1504300	2553400	2927300	2077800	2410700				Q4J6V4	1236350	1206400	2856100	1804250	804815	743975	0.146023	fail	fail
Q4J6V5	4354800	4140200	5902900	6064800	5889000	6854500	7141500	6668100	3436300	3663400	4990500	5163100	6018300	4947400	4961000	5372400	4384500	5238600	6178300	6687500	6166800	5642000	7866200	6805100	6435700	6311600	5703400	4717300	4670100	4768700	5148500	4992700	4845100	4623100	6144100	6329800				Q4J6V5	4247500	5983850	6371750	6904800	3549850	5076800	0.645881	fail	fail
Q4J6V7	63801	48571	52515	48280	167810	154090	237250	127990	48761	26034	114130	141210	128990	112310	118790	64734	128220	185190	57737	57190	64262	78107	61576	39671	63088	69575	63777	73111	207650	152290	70889	30681	126180	33454	65900	66699				Q4J6V7	56186	50397.5	160950	182620	37397.5	127670	0.500368	fail	fail
Q4J6V8	167780	2210100	1940900	2033100	1790300	881470	1744700	1443800	2085600	1577500	2161600	1423400	1925500	2067700	1376400	1531800	1220800	1065900	2369400	2637300	2053500	1516000	2345100	2439600	3799900	3165700	2919200	2136700	1744200	999140	2327800	2549600	319590	1778800	2504700	2341300				Q4J6V8	1188940	1987000	1335885	1594250	1831550	1792500	0.51967	fail	fail
Q4J6V9	196360	257370	280160	304540	246830	293140	318140	222450	236570	251370	294740	234830	223900	176160	161440	152160	206890	210400	231170	241410	336740	285000	368650	265910	242580	201940	309070	226550	244390	217770	269560	301850	144320	172830	315910	306960				Q4J6V9	226865	292350	269985	270295	243970	264785	0.882415	fail	fail
Q4J6W0	960350	1381600	1062800	1072000	861970	977720	881840	932580	831310	791220	1070300	979290	1665200	1530100	2204100	2267800	1050100	1102000	1672500	1786100	1192700	1274200	1292000	1395600	1747800	1781300	1429100	1283500	1022100	936240	1347200	1472000	1724000	1719300	1124500	1154400				Q4J6W0	1170975	1067400	919845	907210	811265	1024795	0.130237	fail	fail
Q4J6W1	135870	196740	175270	165190	217510	217660	300750	249150	216000	213090	292870	247420	229290	314090	414680	395600	248670	252070	227550	294700	209170	203420	210400	213560	277860	325820	153820	230600	274870	208870	227770	220530	274080	262330	142920	152510				Q4J6W1	166305	170230	217585	274950	214545	270145	0.00654973	pass	pass
Q4J6W2	421070	449310	606660	611400	690870	779860	921970	757550	501100	558470	722950	744480	974460	814100	1013800	773950	733490	969270	652040	1251700	1039200	1003700	880640	891500	698190	1112400	671680	356560	821240	888020	1010500	1112500	953400	838170	1027100	1020800				Q4J6W2	435190	609030	735365	839760	529785	733715	0.22613	fail	fail
Q4J6W4	44641	88213	167790	171760	246180	231800	234050	181270	141550	82767	223430	134280	263030	163620	360990	261400	267110	202460	151110	193500	219470	285490	214330	240960	244220	274200	233520	214300	288250	308860	245320	289760	167990	99812	186110	240630				Q4J6W4	66427	169775	238990	207660	112158	178855	0.848657	fail	fail
Q4J6W5	81671	92347	143100	141580	136890	131380	156680	128780	85184	73885	131950	147390	93891	115550	39960	58423	59336	133270	101380	116330	125750	137750	133720	153700	179020	204650	99758	116960	122320	111670	178200	165150	70531	94014	161400	186400				Q4J6W5	87009	142340	134135	142730	79534.5	139670	0.977164	fail	fail
Q4J6W6	2631500	2308100	3618700	3465500	2662000	3168700	2581000	2527800	1673700	1645800	2549200	2619500	2554400	1949900	1910000	2447400	1661300	2124000	3450500	3863900	3219200	3242000	3030100	2707600	3261000	3205000	2633300	2127700	2554100	2267200	3384500	3423200	2533500	2449500	3412000	3409400				Q4J6W6	2469800	3542100	2915350	2554400	1659750	2584350	0.0327002	fail	pass
Q4J6W7	949650	1007900	701920	884530	521560	632380	772700	676530	657080	816560	646710	688260	472590	623520	1000500	1148200	512880	583790	946210	845740	692770	796930	586000	652670	1004700	1113400	807090	712570	480400	652320	790980	990000	693950	1196300	1105400	938420				Q4J6W7	978775	793225	576970	724615	736820	667485	0.401172	fail	fail
Q4J6W9	233470	257370	133270	140690	46086	49434	121310	110780	149600	129530	139840	0	157900	124970	153720	0	107390	63611	0	229230	0	81737	0	68609	210850	222480	221260	224840	93413	0	191110	134590	285250	267350	128900	82029				Q4J6W9	245420	136980	47760	116045	139565	69920	0.43254	fail	fail
Q4J6X1	2218000	1844300	1051400	1002300	857290	494100	1151700	997640	1291600	1282400	942970	648160	989670	1042300	1010300	859050	842290	542140	1345700	1153900	1100100	733660	1271300	984160	1095800	953480	1054100	814980	678450	567290	1047200	931330	1451800	1372000	862630	600980				Q4J6X1	2031150	1026850	675695	1074670	1287000	795565	0.513592	fail	fail
Q4J6X2	97229	280160	41789	20417	35086	7713.3	41355	47831	157470	92182	45214	13327	0	115280	139300	21874	41914	12482	186000	204290	24374	15423	46621	46117	166740	177620	141770	132590	29520	52957	42249	52187	0	0	18958	50330				Q4J6X2	188694	31103	21399.7	44593	124826	29270.5	0.768449	fail	fail
Q4J6X3	636890	667030	779670	780540	726990	675320	933000	779230	535150	469080	920640	813550	1094900	872130	1103000	1137300	760860	730970	1077200	936700	832590	782900	837740	836050	1161800	1052200	948690	859830	830850	715130	934870	959120	1140800	1069800	707800	744220				Q4J6X3	651960	780105	701155	856115	502115	867095	0.721725	fail	fail
Q4J6X4	43980	79458	135300	134220	217180	212790	276590	310770	102100	124260	255410	276010	279810	277020	305400	354900	216440	231990	166300	192070	206040	149650	158710	176670	219110	266450	172670	158420	252120	226340	148940	158820	198500	182050	178020	160630				Q4J6X4	61719	134760	214985	293680	113180	265710	0.0866002	fail	fail
Q4J6X6	1306800	1348300	1072200	927120	918710	842570	904510	1006100	1295300	1146500	1098300	924870	1282100	1358900	1824300	1658100	928560	878360	1524200	1477800	1102800	1027700	1167200	1075500	1440900	1116000	1279700	927420	1078400	1160300	1075100	1147900	1461300	1668700	1015300	1016900				Q4J6X6	1327550	999660	880640	955305	1220900	1011585	0.951024	fail	fail
Q4J6X7	0	0	0	0	87833	99696	0	151830	0	84996	0	59856	0	0	0	0	0	92056	0	0	0	64673	0	0	0	0	0	0	100350	113890	0	0	0	0	0	80010				Q4J6X7	0	0	93764.5	75915	42498	29928	0.583808	fail	fail
Q4J6X8	758110	427580	299840	585580	506930	674740	841760	680660	661340	471890	628780	758110	590160	445640	320120	158470	211820	290450	643380	334640	217350	607670	512970	675650	646710	524780	161440	388470	294190	818760	776300	669750	527640	321120	144700	599220				Q4J6X8	592845	442710	590835	761210	566615	693445	0.153171	fail	fail
Q4J6X9	0	0	0	0	0	0	0	0	0	0	0	0	0	0	0	0	0	0	0	0	0	0	0	0	0	0	0	0	0	0	0	0	0	0	0	0				Q4J6X9	0	0	0	0	0	0	#DIV/0!	#DIV/0!	#DIV/0!
Q4J6Y1	1167200	1319300	1369900	1331800	1043500	1334500	904280	1093300	1008300	963480	1398100	1407000	1452200	1281000	1773700	1834800	1099900	1231200	1809700	1854900	1342700	1588900	1548900	1490700	1890400	1954700	1519900	1382100	1278000	1294200	1769700	1727400	1618200	1714300	1633600	1705800				Q4J6Y1	1243250	1350850	1189000	998790	985890	1402550	0.233737	fail	fail
Q4J6Y3	4756300	4812200	4005600	3999500	3112400	3294400	3520500	3392700	3702400	3834900	3271500	3275600	4019200	3426900	4494400	4925600	2886200	2935500	5029200	5355800	4223200	4248500	4413900	4578100	6009200	5757000	4827500	4132300	3362400	3205100	4627900	4418800	5197700	5048600	5117400	4610800				Q4J6Y3	4784250	4002550	3203400	3456600	3768650	3273550	0.133807	fail	fail
Q4J6Y4	56464	98412	83588	78298	85607	105190	58131	98625	84725	86325	104300	120010	86906	107970	100250	0	77751	107650	29665	80212	84657	107150	61654	105450	108470	151280	77298	80794	122970	126410	147590	156860	60607	111970	82204	107120				Q4J6Y4	77438	80943	95398.5	78378	85525	112155	0.516609	fail	fail
Q4J6Y5	2253300	2168200	2356400	2168900	2239600	2566800	2364300	1843200	1654500	1474400	2426800	2547200	4205400	3490700	5061000	5400400	2755400	3297500	4580700	4907500	3521300	3345600	3753700	3390900	3026500	3312600	3033400	2574500	2327800	2162300	2972300	3104500	3988000	3736700	2332600	2413200				Q4J6Y5	2210750	2262650	2403200	2103750	1564450	2487000	0.244185	fail	fail
Q4J6Y6	97731	136360	197080	290720	263750	252920	207800	244440	135740	137460	289180	218270	233670	265360	275450	321690	335950	342300	231780	244840	287110	354460	228850	232610	189890	265970	228300	186860	291700	352380	232980	194660	236540	411190	218150	258390				Q4J6Y6	117046	243900	258335	226120	136600	253725	0.981526	fail	fail
Q4J6Y7	7897200	6685200	4644200	4110100	4352500	4491200	4248900	5087600	5815000	5330100	4609800	4262200	4823300	4406900	2788900	2417400	3174200	3840500	4442400	4601400	5279900	5044200	6269200	5451200	5023800	5441700	3140900	2625000	4122700	3845400	2189000	2213100	4238200	2585700	6037700	5196300				Q4J6Y7	7291200	4377150	4421850	4668250	5572550	4436000	0.506239	fail	fail
Q4J6Y9	214030	279240	367740	386520	476040	539940	462760	453380	236900	215070	545140	573910	529500	496840	479960	637650	472650	579930	465740	510910	456760	431400	377620	414900	429110	517400	407290	437360	524070	487570	485170	458510	357230	334390	346560	403380				Q4J6Y9	246635	377130	507990	458070	225985	559525	0.649794	fail	fail
Q4J6Z0	183010	175390	465210	370660	368710	431700	423680	462790	198270	230780	467700	436350	404230	404620	462580	605370	407150	402360	394420	517250	512070	392810	412800	415080	414660	454330	371050	359390	463000	402340	513990	463520	303050	397570	398940	352520				Q4J6Z0	179200	417935	400205	443235	214525	452025	0.609464	fail	fail
Q4J6Z1	0	9792.6	7229.2	10444	10923	15104	67499	56082	42274	44902	20277	27627	3197.6	18761	6814.2	21490	11118	22608	0	12889	8424.5	12773	0	0	0	10956	1731.7	3222.4	16682	19304	12434	13256	8971.5	0	3846.1	7079.7				Q4J6Z1	4896.3	8836.6	13013.5	61790.5	43588	23952	0.000976112	pass	pass
Q4J6Z2	17056	13224	11807	11116	41667	38633	83917	58156	68710	73119	23621	44428	32651	28700	3642	41190	35892	35003	0	23762	23278	26927	29437	24415	0	23554	5065.3	0	32777	20816	21592	29393	0	1498.2	33752	17428				Q4J6Z2	15140	11461.5	40150	71036.5	70914.5	34024.5	0.00635835	pass	pass
Q4J6Z3	0	786020	0	52827	157260	0	0	167910	0	0	0	18923	0	582080	0	155380	0	0	484710	0	0	48350	42275	0	777000	0	58284	0	30084	0	0	0	527880	582890	0	201250				Q4J6Z3	393010	26413.5	78630	83955	0	9461.5	0.321971	fail	fail
Q4J6Z4	236220	116570	75323	112770	109220	192720	96646	156860	125880	137980	105180	100740	86101	127360	94472	111520	54099	128460	138300	144900	120000	152720	128090	105940	74847	181340	64693	105270	103730	96708	89703	90830	128780	132010	113130	131990				Q4J6Z4	176395	94046.5	150970	126753	131930	102960	0.471945	fail	fail
Q4J6Z5	74225	89142	166450	183750	117670	150350	120510	109570	85894	66784	198630	181600	251080	194320	314810	269830	180530	155630	237720	246240	178640	184160	195400	191200	191710	252020	200750	203270	201560	158370	192480	209910	202960	215450	188760	167410				Q4J6Z5	81683.5	175100	134010	115040	76339	190115	0.913703	fail	fail
Q4J6Z6	564320	453190	452660	412370	371130	436660	670610	533820	593850	546090	512720	464570	466040	356520	508580	534800	368910	379750	412540	403260	422530	418270	375970	361090	538810	621280	542870	445730	426110	374410	465540	437260	548280	564210	540730	584880				Q4J6Z6	508755	432515	403895	602215	569970	488645	0.0230893	fail	pass
Q4J6Z7	231390	234370	401590	409380	249710	264720	270000	287240	193720	180010	425470	436140	543830	463140	646990	646260	369090	429010	548510	604510	428560	440970	476900	482200	546760	677570	521970	458710	418080	403610	540590	598930	525680	542630	500430	477750				Q4J6Z7	232880	405485	257215	278620	186865	430805	0.996746	fail	fail
Q4J6Z8	239650	269950	175490	219690	165580	201590	191500	197600	300540	226110	272850	299170	510880	374390	595050	482300	323490	390700	315860	371540	316120	288140	298780	293220	483360	480450	514480	446200	278070	293050	328560	347010	350680	552660	394970	466000				Q4J6Z8	254800	197590	183585	194550	263325	286010	0.193634	fail	fail
Q4J700	375900	505310	959690	997770	810150	977180	741090	788840	517880	550890	998770	1181900	1171600	990780	1395500	1422300	840840	1317000	927880	1287500	1056500	1239800	1034700	1080000	849740	844980	985180	897490	1147200	1256900	1018600	1184800	838390	1173500	994260	983340				Q4J700	440605	978730	893665	764965	534385	1090335	0.869352	fail	fail
Q4J701	525580	480840	454580	485720	553310	540710	656710	513490	469420	402990	554910	537550	780530	575240	810360	919200	620550	626110	733810	614210	597590	588400	683440	586630	746040	715720	699000	455220	555310	550830	608610	650750	652200	698550	597490	560090				Q4J701	503210	470150	547010	585100	436205	546230	0.690022	fail	fail
Q4J702	931380	806380	659930	696860	589570	568740	714530	652560	603910	634200	652570	593330	1128400	970040	1270200	1293100	657010	586420	940950	1001700	742340	711270	885340	876900	1098600	1156600	977470	864270	684920	622540	917130	897420	1391900	1293400	925480	756050				Q4J702	868880	678395	579155	683545	619055	622950	0.283665	fail	fail
Q4J704	1260100	1139100	791480	854680	826920	976050	843690	875240	910410	1005300	832270	853810	1124000	895780	1328700	1307500	783020	869710	1237300	1226600	980050	958830	988880	992870	1276300	1113200	1013300	870780	784640	781490	1088300	1127300	1417300	1087400	910010	838180				Q4J704	1199600	823080	901485	859465	957855	843040	0.305577	fail	fail
Q4J706	2079000	2232800	1342600	1247100	1382300	1422700	1711300	1527400	1750400	1528100	1365900	1192000	1942100	1476700	1877800	1836200	1502100	1472200	1911100	1913300	1471700	1478900	1692700	1487300	1984900	1965000	1752200	1338000	1204300	1129900	1560900	1496500	1966000	1560500	1532400	1386300				Q4J706	2155900	1294850	1402500	1619350	1639250	1278950	0.597682	fail	fail
Q4J709	40208	64836	69173	77865	68607	67607	59390	44470	29122	52650	71326	68606	83459	85583	100230	131290	63934	64593	108990	106350	102400	81902	74699	84134	120690	118910	96416	81175	68019	77514	121520	100460	92388	77003	106080	100690				Q4J709	52522	73519	68107	51930	40886	69966	0.236806	fail	fail
Q4J710	850300	521910	1237300	1175400	1445800	1333700	1937200	1244900	847890	652430	1749800	1879900	1890100	1249900	1420600	1087000	1734600	1581200	1581400	1052100	1981300	1595700	2036500	1345000	1354500	870640	1976500	1202700	1760000	1553300	2363400	1926900	1410800	934110	2421500	1709800				Q4J710	686105	1206350	1389750	1591050	750160	1814850	0.299174	fail	fail
Q4J711	0	0	0	0	0	0	0	0	0	0	0	0	0	0	0	0	0	0	0	0	0	0	0	0	0	0	0	0	0	0	0	0	0	0	0	0				Q4J711	0	0	0	0	0	0	#DIV/0!	#DIV/0!	#DIV/0!
Q4J712	127860	84536	219830	226470	146110	152770	267100	222640	183640	179410	271820	229390	203730	124480	195150	107710	213720	305860	248860	223920	382440	243270	390450	230140	393380	317840	410950	252870	327900	199710	346150	300660	50541	93747	417970	305230				Q4J712	106198	223150	149440	244870	181525	250605	0.0373479	fail	pass
Q4J713	0	0	0	0	0	0	231860	295730	104190	212410	263230	277440	0	0	123520	0	114200	421520	0	0	0	0	0	0	0	0	0	0	99557	264600	0	0	0	0	0	0				Q4J713	0	0	0	263795	158300	270335	9.55575e-06	pass	pass
Q4J714	0	0	0	0	0	0	0	0	0	0	0	0	0	0	0	0	0	0	0	0	0	0	0	0	0	0	0	0	0	0	0	0	0	0	0	0				Q4J714	0	0	0	0	0	0	#DIV/0!	#DIV/0!	#DIV/0!
Q4J715	123470	144070	147180	161610	212740	277450	313600	282470	155490	153680	231320	230970	256810	198110	369520	351260	240100	280710	239130	245420	198340	242180	290200	228060	122220	244610	231800	165430	234350	232940	223320	262060	104460	225510	182720	249250				Q4J715	133770	154395	245095	298035	154585	231145	0.186505	fail	fail
Q4J717	372430	613450	136450	234770	263020	204330	189010	284820	337030	400870	262480	276410	353470	424720	522770	649320	240090	79337	284330	259050	130560	198150	199540	197350	452000	561640	165440	141050	190600	200210	107270	151660	435280	474480	351890	246210				Q4J717	492940	185610	233675	236915	368950	269445	0.873622	fail	fail
Q4J718	86643	206620	124560	184320	161870	286330	118420	172120	99853	140360	144040	337470	95757	176310	414340	445300	103380	418850	108110	244590	119400	277620	120450	155010	129490	386490	94462	206260	135660	218380	115600	404620	141810	433540	97964	239970				Q4J718	146632	154440	224100	145270	120106	240755	0.891023	fail	fail
Q4J719	2522300	2816000	2306300	2145500	2055000	2119700	2189300	1977000	2149700	2049300	2133100	1936400	2545700	2337300	2987300	3128400	1639600	1676500	2801100	2755200	2583500	2280200	2752200	2371700	2708800	2761100	2661200	2072200	1856700	1698100	2459700	2338600	2951000	3135200	2390500	2101100				Q4J719	2669150	2225900	2087350	2083150	2099500	2034750	0.0712226	fail	fail
Q4J720	5231400	7501000	5386200	5218700	6907100	8543700	6082300	6966900	5419000	4872000	4295000	5744300	5248100	4495700	7302900	7186300	4521300	5452200	5120800	6509500	5870900	6017500	5513400	6366600	4661900	5985900	4848300	4387800	4734400	5073200	4642400	5238200	4924700	5535300	4717300	5698900				Q4J720	6366200	5302450	7725400	6524600	5145500	5019650	0.219533	fail	fail
Q4J721	0	0	0	27075	32063	27526	119770	88709	58699	66143	162030	112810	87131	58093	0	77031	111190	119020	0	0	43359	65115	39014	32958	55399	0	111290	61022	121130	146160	52220	58036	0	0	62270	44240				Q4J721	0	13537.5	29794.5	104240	62421	137420	0.000449287	pass	pass
Q4J723	52582	70030	121420	95555	121080	149470	121580	101440	83683	62642	107680	112720	107020	97696	90655	163780	117670	122060	126460	130530	137520	127370	148170	104000	144060	120610	108230	118280	132460	106070	145480	149600	174830	173210	161830	135250				Q4J723	61306	108488	135275	111510	73162.5	110200	0.846957	fail	fail
Q4J725	0	0	0	0	0	0	0	0	0	0	0	0	0	0	0	0	0	0	0	0	0	0	0	0	0	0	0	0	0	0	0	0	0	0	0	0				Q4J725	0	0	0	0	0	0	#DIV/0!	#DIV/0!	#DIV/0!
Q4J726	0	0	98032	80305	94772	0	81416	62608	83290	39468	74163	66843	0	0	0	0	141220	101420	0	0	139770	180260	89144	98949	0	0	0	0	131570	151700	62417	73866	0	0	106150	0				Q4J726	0	89168.5	47386	72012	61379	70503	0.321689	fail	fail
Q4J727	84337	340480	126030	116080	94200	40717	131150	42392	219160	169260	117980	34836	236630	67529	298700	297790	56856	64359	223340	230910	111620	42608	135930	96273	161710	169120	194110	158640	97028	0	166010	102140	289160	197160	83167	47132				Q4J727	212408	121055	67458.5	86771	194210	76408	0.786282	fail	fail
Q4J732	0	50473	46355	0	40599	58460	38661	112920	0	0	31097	34358	84591	0	0	0	51608	71851	91693	98946	64382	58335	51900	0	0	0	39283	0	62115	57525	87334	83408	0	0	0	0				Q4J732	25236.5	23177.5	49529.5	75790.5	0	32727.5	0.863109	fail	fail
Q4J739	0	0	0	0	0	0	0	0	0	0	0	0	0	0	0	0	0	0	0	0	0	0	0	0	0	0	0	0	0	0	0	0	0	0	0	0				Q4J739	0	0	0	0	0	0	#DIV/0!	#DIV/0!	#DIV/0!
Q4J741	0	0	0	0	0	0	0	0	0	0	0	0	0	0	0	0	0	0	0	0	0	0	0	0	0	121080	0	0	0	8827.7	0	0	0	25466	0	21444				Q4J741	0	0	0	0	0	0	#DIV/0!	#DIV/0!	#DIV/0!
Q4J746	0	0	0	0	0	0	0	0	0	0	0	0	0	0	0	0	0	0	0	0	0	0	0	0	0	0	0	0	0	0	0	0	0	0	0	0				Q4J746	0	0	0	0	0	0	#DIV/0!	#DIV/0!	#DIV/0!
Q4J747	2872700	2725700	1604300	1251100	1986700	2279200	1943200	1698000	1986900	1619400	1226100	963150	1464000	1249000	1643800	1759300	1108400	833340	1951000	1682400	1601300	1339000	1709800	1693200	1285600	1232200	1205500	1094800	795750	778050	1555100	1307800	1394800	1920000	1467400	1090500				Q4J747	2799200	1427700	2132950	1820600	1803150	1094625	0.104414	fail	fail
Q4J753	785650	962430	740040	675640	335440	455190	368430	466130	744100	846670	437750	519040	758260	779200	634810	576600	363350	464100	955200	939670	731850	832880	1050500	907310	1633000	1734500	1334300	1255100	702240	672160	706840	728220	1008800	1298300	1482200	1456900				Q4J753	874040	707840	395315	417280	795385	478395	0.448872	fail	fail
Q4J760	626480	405550	482350	493860	0	164630	331190	284730	363300	131690	454360	287440	491140	200830	158100	0	244770	0	562650	362900	491020	273640	509340	362510	536630	511400	483390	260220	281930	0	336770	0	0	137020	626320	303960				Q4J760	516015	488105	82315	307960	247495	370900	0.622356	fail	fail
Q4J763	382610	265160	230880	259980	263570	333910	157020	213230	171760	195110	200050	247790	302870	331990	212630	339570	205350	225250	269950	333480	274240	287380	278320	284700	166310	198080	211450	194670	198950	222910	223370	241930	270730	266820	149680	125330				Q4J763	323885	245430	298740	185125	183435	223920	0.00625698	pass	pass
Q4J764	64294	50206	29129	59209	36826	58229	28897	30855	55508	76349	47817	59580	69832	62902	75787	77211	44488	61465	62107	53952	62367	50621	50231	82127	52919	77389	28808	49109	50184	61718	59518	68740	47846	71353	51790	55532				Q4J764	57250	44169	47527.5	29876	65928.5	53698.5	0.984489	fail	fail
Q4J769	366200	322780	80207	54690	126970	152620	25872	65429	118230	152540	69138	70074	170870	140370	86579	135780	70236	128550	28961	89378	50719	130400	82765	115760	0	77010	33658	106280	82274	140400	156670	151520	81507	100940	29184	41142				Q4J769	344490	67448.5	139795	45650.5	135385	69606	0.103538	fail	fail
Q4J770	309030	439420	124240	126650	205920	145810	70840	58955	129370	135820	96399	104260	140570	108960	135770	129390	75553	133100	179780	215480	174590	161790	161370	174930	86816	114800	113800	120030	144070	117620	167630	183040	197420	188180	122560	100770				Q4J770	374225	125445	175865	64897.5	132595	100330	0.0388466	fail	pass
Q4J771	348690	53378	201840	181420	350870	283690	141030	86787	310110	250930	129750	158500	215290	0	0	99886	203920	177290	185640	153850	220540	195250	241740	117580	0	0	211840	143640	117180	109640	202700	227350	0	0	0	146680				Q4J771	201034	191630	317280	113908	280520	144125	0.347616	fail	fail
Q4J773	267590	312290	199010	210290	203970	266240	204160	206610	328960	277310	240770	250620	254970	204320	339420	373900	201360	229350	304440	270050	249340	267010	254690	232300	333480	385180	328280	284640	249020	249730	306280	321760	301240	313980	337050	314060				Q4J773	289940	204650	235105	205385	303135	245695	0.766455	fail	fail
Q4J774	5381000	4928000	2208000	1962600	2098400	1872300	2049000	2174500	3082800	2752500	2214200	1329300	2987100	2788900	3197100	3728200	1874100	1365600	4097500	4098000	2137100	1702600	2776400	2301500	4960300	4513000	4444600	3576100	2463500	1620900	2816000	2737200	5504700	5287700	3456800	2482800				Q4J774	5154500	2085300	1985350	2111750	2917650	1771750	0.279488	fail	fail
Q4J776	1115200	1133400	857210	849820	891990	977920	839310	796820	1050800	992520	889300	831810	1097900	1022400	1676600	1758200	784070	986780	1315100	1611700	1006400	1005700	972360	1017500	1499800	1570500	1469500	1314100	990830	994990	1358200	1489600	1520600	1394900	1201800	1382000				Q4J776	1124300	853515	934955	818065	1021660	860555	0.309812	fail	fail
Q4J780	166430	167570	247280	217600	231250	232740	224420	199950	234260	171440	270980	260780	328880	284240	331510	400450	190610	276090	260430	310640	297970	250630	327140	268730	195630	312370	294550	223440	267670	264030	359810	316690	204110	339160	268500	322980				Q4J780	167000	232440	231995	212185	202850	265880	0.447696	fail	fail
Q4J781	112160	138380	49804	59875	68172	83600	63997	60737	112820	120290	64097	66281	86964	83651	145870	147770	65978	77009	83890	102490	70102	76366	86046	72888	62403	84990	93208	58198	79900	81491	101050	99862	58285	63583	95619	75741				Q4J781	125270	54839.5	75886	62367	116555	65189	0.828306	fail	fail
Q4J782	137920	116620	94424	99176	82098	89224	90800	71757	108390	118930	112300	102410	143020	123230	223920	245600	104780	108990	172850	199480	140350	126760	128450	115890	194680	196610	198090	169200	151990	143030	160550	189860	210820	153990	168170	175670				Q4J782	127270	96800	85661	81278.5	113660	107355	0.825134	fail	fail
Q4J785	55619	198500	39157	55864	111910	95820	19953	65916	108380	129530	65309	117420	26467	126290	155750	194640	72134	142560	0	72226	39763	103850	52204	111800	27145	134200	52671	84140	116460	146690	47532	111600	29487	0	41436	86478				Q4J785	127060	47510.5	103865	42934.5	118955	91364.5	0.780272	fail	fail
Q4J789	31715	30676	43728	39485	0	36724	29868	33602	35447	43927	31096	39202	45051	21533	0	0	25099	44664	34294	17945	44321	31988	33913	55983	45593	100300	35096	34820	32401	21245	36072	57540	0	27074	65510	47508				Q4J789	31195.5	41606.5	18362	31735	39687	35149	0.464107	fail	fail
Q4J791	6103400	5801000	11552000	11538000	6194300	6756700	8774600	7446000	5381200	4802000	8751300	8062500	12571000	10273000	14067000	14717000	8588300	8989400	12669000	12514000	11808000	12163000	12135000	12814000	14275000	13831000	12695000	9824300	9719900	9040100	12458000	11953000	14600000	13833000	10754000	10879000				Q4J791	5952200	11545000	6475500	8110300	5091600	8406900	0.566895	fail	fail
Q4J794	4708700	5159600	7641500	7592000	5214500	5909900	5944500	5626100	4102600	4060200	7256000	7638800	10052000	9174700	12656000	13057000	7413000	8089000	11105000	11687000	8846700	8724600	9425600	9370800	10457000	11508000	10757000	9078100	7864500	7866000	10553000	10639000	10381000	12906000	8917600	8597200				Q4J794	4934150	7616750	5562200	5785300	4081400	7447400	0.749033	fail	fail
Q4J795	29104	57811	73731	58647	69788	68196	142920	99369	44651	27779	77849	67118	153560	146320	204300	253140	144660	129970	138290	187230	126180	106830	115950	102670	204060	188800	207330	145220	110320	102990	150190	137870	159050	0	102200	91606				Q4J795	43457.5	66189	68992	121144	36215	72483.5	0.365456	fail	fail
Q4J796	357380	114120	164880	186380	183430	255500	137670	233910	100170	114780	161750	228960	85200	270990	229280	303970	176750	262010	273640	379550	246970	279460	200480	261450	237310	394960	147540	260900	172540	126000	187020	267550	258830	257890	215120	233860				Q4J796	235750	175630	219465	185790	107475	195355	0.283875	fail	fail
Q4J798	1238400	1427600	2503300	2272100	2800000	2736900	3975800	4007100	1484900	1288000	2164900	2048400	2622200	2179000	2210800	2272100	1872900	1855700	2309300	2095400	3039100	2528400	2616200	2506800	2518800	2506800	2714200	2238300	2214700	2055200	2718400	2385900	2000500	1844800	2251300	2329900				Q4J798	1333000	2387700	2768450	3991450	1386450	2106650	0.56899	fail	fail
Q4J799	1578600	1363700	2896800	2681400	3705000	4446600	3526800	3996600	2038900	1972300	2879900	2563100	3439800	2915800	2673900	2607000	3966300	3632300	3489800	2978700	3609300	3821300	4555900	3471700	2848600	2672900	3397100	2270700	3473900	3759600	3454300	3483300	1815400	1841600	3209800	3231700				Q4J799	1471150	2789100	4075800	3761700	2005600	2721500	0.932753	fail	fail
Q4J7A0	206180	110270	305840	349900	302630	426070	479740	319430	164430	221580	231970	440240	252650	273400	304780	296130	338060	437510	307500	174670	436490	442880	315860	477400	295910	187370	402000	187420	318190	532370	306990	439310	402840	367320	360500	377280				Q4J7A0	158225	327870	364350	399585	193005	336105	0.713046	fail	fail
Q4J7A2	291660	200190	568710	593230	414030	382470	493200	499870	219770	186400	601220	593760	717750	676740	747070	868590	582070	569460	769200	779000	762310	692240	737680	602760	896580	784670	789190	652130	672460	523440	801250	678000	833060	457430	680030	594330				Q4J7A2	245925	580970	398250	496535	203085	597490	0.810914	fail	fail
Q4J7A4	231810	108820	582250	616410	544900	367710	569460	470870	233710	180220	859150	752820	577660	334070	239440	266730	568900	653120	466490	282020	715990	677010	654940	637320	343320	201390	284470	52909	696030	961520	509910	428730	198190	145680	492990	393740				Q4J7A4	170315	599330	456305	520165	206965	805985	0.480528	fail	fail
Q4J7A8	107000	69394	103090	100310	77809	110980	102790	74270	62752	56808	126910	97609	121460	80978	127600	122580	104260	98749	136500	120440	99741	145160	131260	111260	115490	120380	132950	99187	128960	135240	203930	173430	236830	138880	140870	105940				Q4J7A8	88197	101700	94394.5	88530	59780	112260	0.556197	fail	fail
Q4J7A9	1099800	1454600	909460	1065900	982210	1185200	795640	985450	947980	998600	854940	1007800	897140	910950	1305400	1261000	611040	909410	908610	1226200	847960	1044500	865890	1039400	1149300	1378600	1042900	1013000	749740	883610	956010	1235800	1191900	1513000	922430	1138000				Q4J7A9	1277200	987680	1083705	890545	973290	931370	0.0569564	fail	fail
Q4J7B0	0	85920	81389	85748	107360	95284	113950	72564	92593	100030	110330	130890	61713	125840	106160	160200	146910	135200	69285	124430	98067	112850	106090	72519	98104	148320	79420	84513	130620	97696	107160	48083	141240	0	113800	105420				Q4J7B0	42960	83568.5	101322	93257	96311.5	120610	0.151082	fail	fail
Q4J7B2	103490	219870	166870	163310	155560	137390	198470	198250	103840	104480	181330	108460	143480	117770	302380	272170	131350	137710	195520	106920	202710	158750	186290	191980	203080	204590	220090	188120	218130	156760	240500	189810	167540	257320	190430	194830				Q4J7B2	161680	165090	146475	198360	104160	144895	0.738805	fail	fail
Q4J7B3	0	86156	54796	78062	59318	0	62247	31296	41254	33053	60682	40664	49545	67277	0	0	0	66441	0	81874	43575	0	0	61865	50502	125490	139910	64684	65791	28023	51997	84698	0	55878	32738	118660				Q4J7B3	43078	66429	29659	46771.5	37153.5	50673	0.9277	fail	fail
Q4J7B4	56017	111890	84076	77890	50903	76809	61289	67289	59016	50981	85077	86368	110740	88366	134450	158840	104020	126960	118940	136330	88398	140570	73677	93057	123340	130580	125460	111740	111640	113650	150660	196080	156800	194520	100600	120210				Q4J7B4	83953.5	80983	63856	64289	54998.5	85722.5	0.475538	fail	fail
Q4J7B5	0	101910	75250	62463	84534	81115	115150	91381	111140	86972	93845	140840	54563	99330	123980	236580	157490	123950	42005	168080	105630	62655	69546	81894	73949	0	42582	118950	101420	172070	63927	81790	166430	113750	61885	52014				Q4J7B5	50955	68856.5	82824.5	103266	99056	117342	0.0414342	fail	pass
Q4J7B6	0	103400	198050	218310	124050	132490	188890	132620	103900	153310	182600	155720	223310	177570	294890	306980	139340	155130	259470	254790	194920	173020	209600	181500	233140	273590	231150	218460	204220	194720	300620	321480	294780	0	189750	248760				Q4J7B6	51700	208180	128270	160755	128605	169160	0.508296	fail	fail
Q4J7B7	185890	221840	220640	240250	169630	208570	189840	211930	153390	169960	195410	222030	272540	210080	322170	310610	214570	217670	268360	333890	228640	265830	264740	257310	284460	316430	261460	218450	201770	249640	316480	405830	247630	312890	291150	296120				Q4J7B7	203865	230445	189100	200885	161675	208720	0.269544	fail	fail
Q4J7B8	1004000	721570	1040600	1247700	636960	938520	868920	931960	689410	769740	892330	1181700	886840	655580	815700	1055000	422410	832910	952220	1106100	1004500	1431300	1155200	1349100	1002200	1504800	631150	499750	852930	961760	535190	493350	711970	1494700	1189400	1402800				Q4J7B8	862785	1144150	787740	900440	729575	1037015	0.716811	fail	fail
Q4J7C0	526600	1534200	938120	881830	1161200	693360	776980	1276400	1315900	1144900	1132800	880090	1329200	1350500	289800	437650	984220	792260	0	1404300	657920	695960	494440	649490	2343400	2652900	1720800	1154300	856550	684170	586320	1175200	1864700	2278000	711580	712600				Q4J7C0	1030400	909975	927280	1026690	1230400	1006445	0.455891	fail	fail
Q4J7C1	375730	251780	897330	718920	788330	935150	737000	789110	582720	576180	1165300	742830	645990	511480	599840	540680	702760	970700	516700	720880	860070	1139500	834700	687910	614940	563150	637540	400230	785130	767080	795160	649770	505590	494660	855430	630860				Q4J7C1	313755	808125	861740	763055	579450	954065	0.48823	fail	fail
Q4J7C2	245590	240520	0	0	139070	0	120230	127110	0	139350	169530	0	298750	182230	358200	0	0	0	316440	0	160820	0	175070	0	303340	108190	242820	104180	120010	0	209550	0	431250	331580	218600	0				Q4J7C2	243055	0	69535	123670	69675	84765	0.845871	fail	fail
Q4J7C7	118120	0	82535	154060	72023	155310	150950	123160	71782	56960	77872	118120	132930	98888	142000	55325	40071	96093	157750	145620	103670	143580	145620	177860	102420	124030	202200	168320	177900	217330	105370	179070	109790	74063	0	215970				Q4J7C7	59060	118298	113666	137055	64371	97996	0.923025	fail	fail
Q4J7D0	0	75127	98825	82396	111920	181830	119580	165750	65503	82696	91117	93460	48725	125340	90874	156200	74578	121180	52272	70079	83632	134490	83949	156340	109040	214670	25047	35066	61837	89812	8428.6	17439	0	0	88446	117380				Q4J7D0	37563.5	90610.5	146875	142665	74099.5	92288.5	0.694728	fail	fail
Q4J7D4	143700	137770	37904	96846	35200	68240	47580	69949	72370	93487	51339	79627	63814	75843	135620	172410	85324	128840	138700	177970	39420	142520	86335	114770	184700	196450	189480	157290	104620	133620	113270	192390	156060	167970	131580	174580				Q4J7D4	140735	67375	51720	58764.5	82928.5	65483	0.415892	fail	fail
Q4J7D8	434010	272850	312090	335050	282360	360360	366880	308540	353220	332030	294790	302830	406580	356790	338000	302230	350930	424120	423230	471360	396700	428400	346300	369090	538480	484330	551780	362280	340450	313900	475230	457410	309170	309130	452910	481860				Q4J7D8	353430	323570	321360	337710	342625	298810	0.817145	fail	fail
Q4J7E0	2766800	2180100	3031800	3013500	2650000	2890900	3253200	2502300	2653400	2334300	2909100	3143800	3546700	2724400	2303600	2651400	2577900	2781000	3389300	3213700	3050500	3204700	3600500	2660000	4139600	4223100	3923600	2909100	2716000	2679800	3760000	3054500	2535700	2154800	4089600	3664900				Q4J7E0	2473450	3022650	2770450	2877750	2493850	3026450	0.82853	fail	fail
Q4J7E2	0	0	48249	58756	71351	78590	72462	69561	51324	60208	72195	82685	51539	57104	18555	127610	65114	103060	58815	120650	105220	84517	84674	92748	70350	48313	108670	70348	92344	100530	79693	108500	0	0	122410	116470				Q4J7E2	0	53502.5	74970.5	71011.5	55766	77440	0.120491	fail	fail
Q4J7E3	0	154170	247800	0	0	0	320220	0	224240	0	0	0	237810	0	0	221560	279260	0	0	0	355030	364650	626440	475380	157660	224640	0	208630	317020	0	242020	0	248080	68322	126500	343930				Q4J7E3	77085	123900	0	160110	112120	0	0.752972	fail	fail
Q4J7E4	30421	36240	89308	93951	87458	125690	129150	80561	88011	76713	74860	74173	88822	97340	111750	131630	115470	121790	87729	77288	95466	82240	116180	107330	97953	110720	92928	73693	93679	107540	87856	83114	96257	125580	66399	114540				Q4J7E4	33330.5	91629.5	106574	104856	82362	74516.5	0.573682	fail	fail
Q4J7E7	0	66727	162570	0	0	72048	0	58540	377960	88340	95748	0	290990	165370	280670	0	125850	72429	174840	161710	113420	103260	162230	124480	283100	411570	296190	201550	69439	34251	131990	191910	283420	198980	221770	214590				Q4J7E7	33363.5	81285	36024	29270	233150	47874	0.419857	fail	fail
Q4J7E9	513120	456790	398690	369620	511850	495710	490330	418980	388330	300420	327320	291280	419200	336330	429490	415900	317880	275330	476480	427090	417740	422710	539220	418300	617370	547060	541390	435730	310140	273290	425910	480390	568100	407970	541640	445020				Q4J7E9	484955	384155	503780	454655	344375	309300	0.0535729	fail	fail
Q4J7F0	0	0	0	0	0	0	0	0	0	0	0	0	0	0	0	0	0	0	0	0	0	0	0	0	0	0	0	0	0	0	0	0	0	0	0	0				Q4J7F0	0	0	0	0	0	0	#DIV/0!	#DIV/0!	#DIV/0!
Q4J7F1	557700	636780	554550	544260	666710	709890	683290	614540	526790	485480	593590	573440	688050	634710	901790	879440	568160	610740	782100	827350	634130	634900	686070	608630	725870	696690	738800	589100	549000	488710	657370	592570	646790	687680	672380	571800				Q4J7F1	597240	549405	688300	648915	506135	583515	0.439997	fail	fail
Q4J7F2	0	646620	150740	363080	372290	0	25883	369190	0	82382	429980	310460	0	603760	0	864490	355870	355740	519720	709460	445860	386070	381180	543850	0	0	147260	465480	360810	273070	601650	579290	903770	0	0	556900				Q4J7F2	323310	256910	186145	197536	41191	370220	0.69226	fail	fail
Q4J7F3	328090	287450	466380	428860	462480	528140	467280	404530	394510	347660	439120	469280	535670	369860	434230	551650	717570	518170	630170	489380	501830	588560	630180	548670	653080	609970	574180	438170	450800	536540	567040	571850	775250	482790	566300	579390				Q4J7F3	307770	447620	495310	435905	371085	454200	0.935243	fail	fail
Q4J7F4	602670	562000	1553300	1000900	1530000	2015700	1547800	1352700	853890	891120	1761000	2130900	1181900	1262200	1606400	2069300	1943400	2223300	949460	1074700	1373500	1370500	1432600	1170800	815480	1848900	715320	1161400	2005000	2056100	1117900	1415000	623250	433550	1434800	1197800				Q4J7F4	582335	1277100	1772850	1450250	872505	1945950	0.513681	fail	fail
Q4J7F5	0	0	0	56387	0	235390	174990	115560	0	0	55318	208300	69387	76704	0	119790	0	227800	47298	58357	176630	244500	0	185080	0	0	79287	113440	164830	238380	0	220690	0	0	46713	64649				Q4J7F5	0	28193.5	117695	145275	0	131809	0.426864	fail	fail
Q4J7F6	0	0	0	0	52139	61983	0	0	316730	0	0	86747	0	0	0	0	78688	0	0	0	0	0	0	0	0	0	0	0	0	75347	0	0	0	0	0	37713				Q4J7F6	0	0	57061	0	158365	43373.5	0.386512	fail	fail
Q4J7F8	0	0	39859	23368	0	40946	28574	27271	20514	0	42616	53923	32036	0	0	0	31080	49614	20577	0	54140	43875	29772	33641	0	0	0	0	55900	41427	21396	24051	0	0	23502	21191				Q4J7F8	0	31613.5	20473	27922.5	10257	48269.5	0.328222	fail	fail
Q4J7F9	686740	666830	719970	544070	681760	949530	517780	723370	600630	850540	808070	728680	670950	718540	1295600	1143500	745000	636140	858400	841700	638480	716570	658170	745050	787140	702430	720980	569480	892880	913990	914220	865440	1039700	1270100	565440	430630				Q4J7F9	676785	632020	815645	620575	725585	768375	0.965523	fail	fail
Q4J7G0	1265900	1259600	1254400	1359900	1171300	1247600	1448800	1281300	1168300	1249300	1256200	1287500	1368100	1293600	1029100	1373700	1238900	1379500	1304500	1401500	1319900	1361200	1281100	1560900	1296300	1469700	1344600	1261400	1179600	1553600	1430500	1676300	1099800	1050300	1407200	1377900				Q4J7G0	1262750	1307150	1209450	1365050	1208800	1271850	0.633232	fail	fail
Q4J7G1	346490	231500	201400	64731	104710	117630	153930	204260	208390	108920	181600	81607	186850	155960	248650	335260	241450	625480	265090	199710	128170	79515	92199	121740	262450	230660	30552	253960	178020	252790	172530	98120	0	496380	96420	80638				Q4J7G1	288995	133066	111170	179095	158655	131604	0.66222	fail	fail
Q4J7G2	1147500	933470	903660	933860	749010	903100	710240	726030	784330	758100	990640	975740	1250300	962690	1316300	1430700	750460	909420	1229300	1315400	1000400	1100600	1014100	1011400	1321800	1320300	1072200	930030	1004600	1002600	1136600	1225700	1287600	1313900	1112000	1059600				Q4J7G2	1040485	918760	826055	718135	771215	983190	0.184825	fail	fail
Q4J7G3	3869200	3079900	3349500	3816500	3222800	3860900	3406600	3349600	3295900	3408500	4063300	4391100	5216500	4619600	4316400	3991700	5064400	5423100	5275000	5728100	4128900	5147500	4844000	4571600	4301300	3861000	4134700	3495000	4017500	4762300	4036100	3765200	3914100	6119900	3852500	3918500				Q4J7G3	3474550	3583000	3541850	3378100	3352200	4227200	0.625841	fail	fail
Q4J7G4	0	0	341510	226850	597430	0	807500	487880	506380	125550	672030	479340	539160	418870	120080	0	540250	303510	229680	257770	596160	427630	556720	387100	0	210540	393970	257290	453910	308770	422090	258750	0	0	425740	284180				Q4J7G4	0	284180	298715	647690	315965	575685	0.0421647	fail	pass
Q4J7G6	2909300	2624700	734560	698160	385580	462540	472090	493250	1418900	1372000	498010	490670	973150	853360	1147600	1254900	543690	631650	1453900	1576300	1071100	933120	886640	1119800	2293600	2317600	1695800	1451900	773340	715550	1110000	1120100	2684300	2998400	1892400	2025700				Q4J7G6	2767000	716360	424060	482670	1395450	494340	0.33521	fail	fail
Q4J7G7	538390	172290	474070	382080	526400	425470	687510	403940	721440	625100	431740	500430	307050	174400	272960	0	544690	547560	292750	76965	495480	481210	570330	382570	289830	36189	461400	147240	384300	478600	373030	231210	353180	25826	488260	484820				Q4J7G7	355340	428075	475935	545725	673270	466085	0.0984497	fail	fail
Q4J7G8	126380	140260	143840	213330	171670	147730	156360	161860	227680	204030	158360	138670	112570	104650	149240	188290	105340	213210	120090	147420	205280	275770	207760	243620	172710	176730	163510	139550	146220	157360	187500	193320	116170	101980	207110	220730				Q4J7G8	133320	178585	159700	159110	215855	148515	0.379238	fail	fail
Q4J7H0	23636	27691	55751	26102	11837	15554	11334	8142.5	61404	56539	20584	28744	0	22750	0	0	19704	24932	0	43901	23521	24832	36256	27399	24269	30132	71851	24596	28222	43962	43107	32212	0	0	11313	39007				Q4J7H0	25663.5	40926.5	13695.5	9738.25	58971.5	24664	0.706374	fail	fail
Q4J7H1	0	57856	0	0	0	0	0	0	137920	0	0	0	0	0	0	0	0	167670	0	36275	0	0	0	0	0	0	0	78031	0	91256	0	8049.9	0	0	0	0				Q4J7H1	28928	0	0	0	68960	0	0.60413	fail	fail
Q4J7H2	0	0	66783	38319	48885	47685	31739	29944	38294	30482	39995	39552	0	21825	0	0	46354	54869	18722	0	37610	0	31682	17985	32949	0	48493	0	29781	48740	14992	20330	0	0	35561	23930				Q4J7H2	0	52551	48285	30841.5	34388	39773.5	0.905769	fail	fail
Q4J7H3	0	0	0	0	0	0	0	0	0	0	0	0	0	0	0	0	0	278370	0	0	0	0	930030	0	0	0	0	0	0	0	0	0	0	0	0	0				Q4J7H3	0	0	0	0	0	0	#DIV/0!	#DIV/0!	#DIV/0!
Q4J7H4	58555	40045	80638	75886	58753	74879	55617	47588	72607	68129	77712	90988	58564	55760	13196	13402	53765	0	91186	65526	0	112170	89520	68695	62766	82552	61959	89081	67471	0	81026	101180	22861	0	81749	40193				Q4J7H4	49300	78262	66816	51602.5	70368	84350	0.664058	fail	fail
Q4J7H5	501710	460520	637650	589920	410730	569090	705780	486410	511040	380230	548940	625230	474620	418950	390770	221430	397830	530080	364970	450200	629730	659220	660680	690930	636780	547550	495150	383110	443050	435200	457830	395610	437120	295820	626110	554310				Q4J7H5	481115	613785	489910	596095	445635	587085	0.805121	fail	fail
Q4J7H6	0	0	0	48076	60637	31687	63527	60718	51324	49637	59053	52148	0	0	0	0	0	34949	0	0	60943	33595	51356	32395	0	0	0	0	47659	34393	5391.5	0	0	0	43293	34567				Q4J7H6	0	24038	46162	62122.5	50480.5	55600.5	0.016515	fail	pass
Q4J7H7	487370	496560	223800	386120	0	157470	98107	0	331020	75699	0	81813	506640	384790	596790	654700	267200	345780	499180	0	296510	0	375710	103050	547470	496140	472290	448400	62141	162590	472460	65755	711670	378380	478160	0				Q4J7H7	491965	304960	78735	49053.5	203360	40906.5	0.0684426	fail	fail
Q4J7H8	868800	666510	912270	806450	766690	662820	678130	587780	661460	563460	908980	807320	674580	501770	500040	653600	474630	508820	649610	528660	942300	810530	1088700	762820	828750	599510	819720	545690	646490	599340	887430	712930	660020	522360	964230	833490				Q4J7H8	767655	859360	714755	632955	612460	858150	0.274095	fail	fail
Q4J7I0	0	0	173860	0	0	0	701120	129230	200040	0	102100	0	33272	0	0	0	0	0	0	0	0	0	0	0	0	0	0	0	0	0	0	0	0	0	0	0				Q4J7I0	0	86930	0	415175	100020	51050	0.180876	fail	fail
Q4J7I5	77089	0	58936	111040	183730	146040	286630	247210	78213	125530	174140	202970	283700	178450	141990	93418	122760	200150	0	190030	135400	148990	192100	172940	155650	201540	126750	150880	184740	193590	113370	92626	111460	167850	188520	146150				Q4J7I5	38544.5	84988	164885	266920	101872	188555	0.0546849	fail	fail
Q4J7I6	1886300	1678100	2188800	2216700	1852500	2115300	1896600	1843600	2285000	2032200	2515800	2603000	2667300	2088600	1970000	1671100	2192900	2467200	2308600	2252400	2735300	2507000	2763200	2423400	2360400	2345400	2901200	2148200	2444800	2396800	2687700	2553300	2052200	1905800	2587500	2481100				Q4J7I6	1782200	2202750	1983900	1870100	2158600	2559400	0.220976	fail	fail
Q4J7I8	325420	363700	495970	489290	451400	493210	464090	429680	333390	333550	575810	553790	626660	457920	811180	832160	474360	565440	678340	583960	599530	561650	654420	543330	759070	773740	742520	599590	631960	603520	766180	726850	624040	683850	681290	632120				Q4J7I8	344560	492630	472305	446885	333470	564800	0.824467	fail	fail
Q4J7I9	56225	60535	57277	34484	84578	57440	48231	87611	46276	28765	76972	66292	30500	27089	116270	77068	62979	77625	69977	63063	29306	44935	0	100270	50864	75225	54006	81603	54488	0	49939	125370	89899	98073	47000	57187				Q4J7I9	58380	45880.5	71009	67921	37520.5	71632	0.957629	fail	fail
Q4J7J3	552410	653850	553140	609740	531430	675500	566000	579890	400650	475390	547660	611420	783660	739070	984940	1045000	509730	722920	798190	899930	646880	760060	779050	769430	869800	1043200	720710	728890	575490	629110	713990	888320	735280	884740	692060	716920				Q4J7J3	603130	581440	603465	572945	438020	579540	0.131489	fail	fail
Q4J7J4	191940	170320	171320	201920	188310	187140	235680	203330	165240	152010	180560	174930	214520	201500	195560	116550	208240	152930	197890	260590	228920	199810	193460	190780	286860	272790	175930	171700	201720	170900	263460	224220	161840	199980	203280	173580				Q4J7J4	181130	186620	187725	219505	158625	177745	0.992161	fail	fail
Q4J7J5	0	0	0	0	0	0	0	0	0	0	0	0	0	0	0	0	0	0	0	0	0	0	0	0	0	0	0	0	0	0	0	0	0	0	0	0				Q4J7J5	0	0	0	0	0	0	#DIV/0!	#DIV/0!	#DIV/0!
Q4J7J6	75261	114810	101640	128220	120600	106460	148420	106430	112860	50188	125480	126800	156520	101190	160230	83815	135390	144250	189960	160950	194720	192960	227270	132710	228980	180120	124250	135770	124180	85240	182340	122380	132980	124520	227790	174300				Q4J7J6	95035.5	114930	113530	127425	81524	126140	0.809447	fail	fail
Q4J7J8	0	0	411670	180070	385970	137020	0	68132	399620	372380	227240	0	0	0	0	0	339780	0	0	0	260040	98655	536920	0	0	0	0	0	332550	140830	0	0	0	0	0	0				Q4J7J8	0	295870	261495	34066	386000	113620	0.941255	fail	fail
Q4J7K0	92617	178090	169250	171100	116150	130970	163920	112290	176060	149570	158480	141600	181280	151170	224530	173860	141750	104790	153360	177180	140990	154720	143260	142780	203570	238590	188760	163320	127740	136090	212590	214580	232940	253200	169990	175330				Q4J7K0	135354	170175	123560	138105	162815	150040	0.67503	fail	fail
Q4J7K5	437770	327410	272490	325520	181310	225630	474320	371890	334160	230260	274720	221680	368210	294040	496320	549530	261330	445480	403080	381240	416270	293270	363910	276320	386020	583450	501940	387530	364520	333610	377050	342610	479780	473410	428670	325250				Q4J7K5	382590	299005	203470	423105	282210	248200	0.68086	fail	fail
Q4J7K6	218270	144330	204630	173710	187980	216130	149900	107540	166600	92679	160040	184570	190090	167690	214250	159310	178370	170680	257290	289310	324480	249750	295760	268390	266540	270080	246860	219710	172840	152650	287970	261000	255240	223180	295820	254400				Q4J7K6	181300	189170	202055	128720	129640	172305	0.0297333	fail	pass
Q4J7K7	929860	1113400	858240	918020	981130	1076300	727840	845920	722540	650950	841790	903410	875350	853780	1365600	1379400	925500	1202800	930680	1206100	957020	1028600	1051300	1011100	1362900	1480200	1187400	1017500	758070	820000	1137600	1108400	946830	1064700	1313100	1311400				Q4J7K7	1021630	888130	1028715	786880	686745	872600	0.00552646	pass	pass
Q4J7K8	0	0	0	0	0	0	0	0	0	0	0	0	0	0	0	0	0	0	0	0	0	0	0	0	0	0	0	0	0	0	0	0	0	0	0	0				Q4J7K8	0	0	0	0	0	0	#DIV/0!	#DIV/0!	#DIV/0!
Q4J7L0	157840	301930	198040	168490	179330	253220	183910	158350	172740	198470	197000	264980	148630	219340	387260	374730	141830	243140	146940	255360	177410	178720	181360	183910	255920	356550	145880	222880	224960	227590	223850	224200	304450	402780	207410	274520				Q4J7L0	229885	183265	216275	171130	185605	230990	0.624411	fail	fail
Q4J7L1	0	33852	0	67449	37935	483130	200170	185700	258210	154540	252970	207090	0	0	0	0	333810	604890	0	0	172500	0	105840	53060	0	0	0	0	191320	285990	0	0	0	0	172080	0				Q4J7L1	16926	33724.5	260532	192935	206375	230030	0.205417	fail	fail
Q4J7L2	388260	369840	528230	384490	415770	409790	556190	441520	404970	386060	467620	408400	375880	337170	339150	347650	348550	365160	435250	326780	598510	396600	524540	473680	484830	418930	638100	415140	433100	356240	369720	447710	220460	266510	558900	471110				Q4J7L2	379050	456360	412780	498855	395515	438010	0.435646	fail	fail
Q4J7L3	2071600	1988100	1235900	1351000	1369400	1515000	1422700	1375600	1445000	1560700	1386100	1484800	1764700	1590400	2135300	2208900	1323100	1667800	1694600	2186500	1537200	1649000	1445700	1627100	1865800	2141100	1859700	1765700	1308400	1378400	1640300	1625000	1863400	1673100	1566600	1756400				Q4J7L3	2029850	1293450	1442200	1399150	1502850	1435450	0.355573	fail	fail
Q4J7L4	251240	326720	298340	209230	184890	228680	294600	199760	244940	196660	282400	240770	280920	230160	349140	361750	216680	234360	348960	305230	292260	226750	278900	297060	374260	308080	373640	287610	217930	234660	321190	258450	354860	294300	311300	332790				Q4J7L4	288980	253785	206785	247180	220800	261585	0.814022	fail	fail
Q4J7L6	118400	82226	222660	229690	169540	176160	346860	255690	197130	159610	237880	228920	189810	154710	110670	181650	210390	280000	112460	0	237960	32192	316450	91003	0	132280	108230	96429	234490	199860	294850	161460	173900	232330	391930	191610				Q4J7L6	100313	226175	172850	301275	178370	233400	0.069111	fail	fail
Q4J7L7	0	0	0	0	0	0	0	0	0	0	0	0	0	0	0	0	0	0	0	0	0	0	0	0	0	0	0	0	0	0	0	0	0	0	0	0				Q4J7L7	0	0	0	0	0	0	#DIV/0!	#DIV/0!	#DIV/0!
Q4J7L8	0	160480	85653	0	154980	81191	89444	121170	137620	115920	131280	85520	176140	57980	104560	0	128530	0	0	0	0	125830	60931	0	0	187490	138280	86580	57833	137270	67955	61683	271940	0	109050	166210				Q4J7L8	80240	42826.5	118086	105307	126770	108400	0.297762	fail	fail
Q4J7L9	361170	547080	292310	303230	144840	236380	199800	206750	236680	296850	173560	225430	333240	355580	321250	422170	209680	224840	227320	449740	226530	312250	219850	355730	459360	506640	327080	398910	153540	217220	410340	407180	246400	540800	332660	418890				Q4J7L9	454125	297770	190610	203275	266765	199495	0.147318	fail	fail
Q4J7M0	22685	0	16011	27908	0	0	0	36531	0	16747	0	17147	54998	0	32264	36171	0	0	0	19030	0	33011	39598	0	0	0	36813	0	0	9031.2	23528	37818	32900	90890	0	68774				Q4J7M0	11342.5	21959.5	0	18265.5	8373.5	8573.5	0.937681	fail	fail
Q4J7M4	425500	472800	367730	398730	243330	332580	295010	173820	366680	258100	333870	344280	358430	252720	418590	312790	246040	324870	462690	437510	510680	522510	436940	463480	629120	564490	448350	346200	322480	326030	428840	493620	356840	381600	473840	496740				Q4J7M4	449150	383230	287955	234415	312390	339075	0.103172	fail	fail
Q4J7M6	0	0	0	0	0	0	0	0	0	0	0	0	0	0	0	0	0	0	0	0	0	0	0	0	0	0	0	0	0	0	0	0	0	0	0	0				Q4J7M6	0	0	0	0	0	0	#DIV/0!	#DIV/0!	#DIV/0!
Q4J7M7	0	0	0	9484.3	0	43535	0	5432.7	0	49117	0	44144	0	0	0	0	0	44304	0	0	0	0	0	0	0	0	0	0	0	0	0	0	0	0	0	0				Q4J7M7	0	4742.15	21767.5	2716.35	24558.5	22072	0.538418	fail	fail
Q4J7M8	57231	134490	101860	126250	47136	94575	99414	90835	72405	85284	90736	105560	40189	103170	208670	293970	63754	84829	53029	114030	63866	105020	51480	117110	92276	157390	89346	95591	77638	89444	63892	72044	123330	0	170700	185610				Q4J7M8	95860.5	114055	70855.5	95124.5	78844.5	98148	0.85347	fail	fail
Q4J7M9	245780	263550	263030	269130	293110	378140	353720	305320	262340	244770	303810	330570	359080	321200	359950	396450	297180	321010	205690	275950	323900	313540	384990	324290	309330	323780	275740	264460	277780	303270	291140	335540	291840	327560	318230	294640				Q4J7M9	254665	266080	335625	329520	253555	317190	0.581598	fail	fail
Q4J7N0	213320	139280	91774	134740	103440	201270	211500	96258	129800	92054	109990	151450	115990	152190	178130	263230	111640	153350	140460	172380	118700	168960	129310	145740	149870	179550	128040	130270	104080	135680	166820	138340	90209	277860	141750	142240				Q4J7N0	176300	113257	152355	153879	110927	130720	0.585294	fail	fail
Q4J7N1	0	399900	174340	288970	367730	703650	129760	481130	325410	208770	292380	650580	127720	404280	1001100	1474100	267260	1100400	87971	968430	94889	519860	84752	237180	70950	697730	57240	394830	309410	546980	221500	214560	849680	841550	49181	470680				Q4J7N1	199950	231655	535690	305445	267090	471480	0.840576	fail	fail
Q4J7N2	60465	120320	128530	143960	139030	181600	179370	168560	121000	87103	171000	161670	226110	186310	249830	261160	175250	167140	215370	223800	194390	163710	208830	159570	227010	268490	253860	179650	175290	170320	224030	211570	182030	120260	217030	213240				Q4J7N2	90392.5	136245	160315	173965	104052	166335	0.403359	fail	fail
Q4J7N3	0	0	113170	43250	125000	87163	125660	122480	96618	86823	152330	83330	63119	0	0	0	131380	65161	0	0	96022	84779	137840	48928	0	0	92401	0	190200	56330	81067	46525	158080	0	143520	42121				Q4J7N3	0	78210	106082	124070	91720.5	117830	0.0752787	fail	fail
Q4J7N5	0	0	68935	73406	96779	160240	85541	138420	39087	65585	105260	127400	57122	118690	162740	163750	53750	98822	32074	142110	70477	99573	45407	95787	341610	108120	72095	52084	75599	110910	42121	94849	0	89735	102230	115140				Q4J7N5	0	71170.5	128510	111980	52336	116330	0.378282	fail	fail
Q4J7N6	170530	255020	217180	223880	337100	369470	433070	378250	208050	250620	307220	431570	295400	380170	540960	439810	426940	359590	284920	412220	294250	336640	287420	336950	283210	421740	204610	315920	371570	329370	249010	385950	229520	265320	336740	315610				Q4J7N6	212775	220530	353285	405660	229335	369395	0.174209	fail	fail
Q4J7N8	268590	363920	213350	250320	211710	167440	142360	292060	155480	257740	239530	143900	159890	232050	248910	285510	157740	129890	220860	348730	118500	157560	167120	175870	297930	442150	300380	295620	187860	130190	208430	201230	295220	408100	215900	220620				Q4J7N8	316255	231835	189575	217210	206610	191715	0.315421	fail	fail
Q4J7P0	1019900	1366800	1247400	1170000	1473300	1559000	1196900	1057400	1287900	1094400	1154000	1370300	1311100	1124500	1177800	1514000	1288400	1515700	1367000	1458400	1758000	1524500	1439300	1475400	1609100	1514900	1477000	1148300	1399300	1293900	1569000	1588200	1326100	1494600	1466700	1530500				Q4J7P0	1193350	1208700	1516150	1127150	1191150	1262150	0.262399	fail	fail
Q4J7P1	4214500	4406600	3018300	2849600	3386400	3460700	4055100	2905500	4152800	3489400	2513600	2378800	2503100	2267700	3127900	3039300	2298100	2326800	3102300	2941000	3145100	2765600	3233400	2981300	2718100	3353100	3154000	2259400	2062400	1937700	3301900	2997800	2863100	2793200	3109800	2866800				Q4J7P1	4310550	2933950	3423550	3480300	3821100	2446200	0.46631	fail	fail
Q4J7P2	807210	1251300	731510	707390	787050	779590	756140	888010	680980	799020	617280	646730	602860	598850	814040	1048500	480910	643000	543020	731590	552080	670050	581630	780500	914260	1027900	663100	677380	570960	526950	536890	741440	622330	959080	502940	692810				Q4J7P2	1029255	719450	783320	822075	740000	632005	0.252722	fail	fail
Q4J7P3	0	0	0	0	0	0	158510	0	0	0	178350	0	0	0	0	0	0	0	0	0	0	0	168500	0	0	0	0	0	0	0	0	0	0	0	0	0				Q4J7P3	0	0	0	79255	0	89175	0.145865	fail	fail
Q4J7P4	0	0	0	0	0	0	0	0	0	0	0	0	0	0	0	0	0	0	0	0	0	0	0	0	0	0	0	0	0	0	0	0	0	0	0	0				Q4J7P4	0	0	0	0	0	0	#DIV/0!	#DIV/0!	#DIV/0!
Q4J7P5	58786	77849	33450	56373	47275	45331	34130	68374	133770	27607	58190	48756	0	0	0	0	39130	66448	0	77439	52825	53741	37863	65708	73687	107290	0	0	47048	47542	0	0	0	0	0	63703				Q4J7P5	68317.5	44911.5	46303	51252	80688.5	53473	0.618937	fail	fail
Q4J7P7	96701	40016	82277	75006	85426	73700	83011	98987	50099	59397	77187	66793	77850	61565	58807	46031	47234	57424	107810	85190	83260	52079	93897	83786	159620	150520	102830	99078	57515	42776	96546	81339	104100	126550	11712	74574				Q4J7P7	68358.5	78641.5	79563	90999	54748	71990	0.7878	fail	fail
Q4J7P9	530920	519800	581130	584260	516250	567460	657240	534870	424420	416550	589600	525410	797950	603240	465480	399780	624640	605190	831770	740190	732240	725370	825370	689020	948500	775560	974850	745360	589430	509650	806950	684980	556370	416500	807480	785670				Q4J7P9	525360	582695	541855	596055	420485	557505	0.543479	fail	fail
Q4J7Q0	669050	462730	544170	525800	439550	409780	728940	549480	391590	403970	472470	455810	332150	438650	120790	403520	177240	326940	345450	251750	490890	432600	464990	515460	805960	1034300	259520	568870	339920	291150	374240	329540	537790	575090	565850	660690				Q4J7Q0	565890	534985	424665	639210	397780	464140	0.901197	fail	fail
Q4J7Q1	4165700	4280800	3173000	3239900	3644700	4137300	3783200	3723500	3538200	3243200	3088500	2873100	3433500	3019300	3279500	2768400	2787200	3377800	3384400	3370300	3464900	3600000	4083800	3885000	4204200	4358900	3803400	3026600	2754100	2949000	3615700	3818800	3214900	2976700	3481600	3367500				Q4J7Q1	4223250	3206450	3891000	3753350	3390700	2980800	0.141584	fail	fail
Q4J7Q2	9815800	8957300	7042900	6767500	7520900	8492600	9256800	7987300	7387600	7065600	6348800	5977500	7556100	6673500	6279800	5985200	5905300	6451500	7696200	7601500	6968700	6864300	8036300	7037400	8098900	8122600	7584300	5787300	6106400	5286200	6768200	6479300	7229200	7217400	6827600	6287100				Q4J7Q2	9386550	6905200	8006750	8622050	7226600	6163150	0.291756	fail	fail
Q4J7Q3	1183800	939420	1117300	1039200	1490000	1679800	1372700	1209100	1163600	1010600	1081100	1363800	1056200	891050	844990	756790	1174000	1335900	1214700	961680	1478800	1409200	1581000	1376000	1676000	1284000	1413500	800130	1574800	1172600	1377500	1226600	1102600	671800	1460200	1412100				Q4J7Q3	1061610	1078250	1584900	1290900	1087100	1222450	0.757825	fail	fail
Q4J7Q4	0	30160	80615	51565	133490	92480	97548	0	83163	61648	111720	92576	69504	21715	0	0	137670	111950	74226	0	204090	75920	160050	45898	26831	45514	40456	28960	137300	134970	81873	49864	0	0	127930	64635				Q4J7Q4	15080	66090	112985	48774	72405.5	102148	0.709761	fail	fail
Q4J7Q5	725750	831830	733950	769150	889640	949720	952710	895460	684830	678370	816740	874950	926180	822700	977440	1102900	783430	1031300	942270	1042900	933710	986000	948630	953120	982440	1060200	1003400	883820	832680	926170	941640	1046800	1011900	893130	906820	864580				Q4J7Q5	778790	751550	919680	924085	681600	845845	0.993387	fail	fail
Q4J7Q7	265930	282630	141990	153030	136980	186240	206240	158640	209790	204080	170910	167420	195570	153550	156340	166110	121240	165650	168720	167720	147650	151910	174780	137950	250090	285250	226140	146960	161510	135380	139690	156310	217580	195310	226690	171010				Q4J7Q7	274280	147510	161610	182440	206935	169165	0.772508	fail	fail
Q4J7Q8	1434700	1593800	1246500	1259900	1129000	1251800	952800	1142300	1054600	1145000	1221800	1276000	1593800	1611400	1643800	1883400	1074800	1427000	1577000	1933900	1277600	1454300	1343600	1520000	1615700	1789800	1501800	1367600	1212200	1183700	1319900	1819100	1148400	1332800	1296500	1314400				Q4J7Q8	1514250	1253200	1190400	1047550	1099800	1248900	0.0471967	fail	pass
Q4J7Q9	498750	427790	441360	469260	254490	326220	359720	358220	288500	244300	392320	419030	345220	320230	496660	537910	259170	330580	520850	559310	386360	350380	419900	451270	776820	691970	598170	506800	331840	311960	471100	512440	525990	688850	469140	451890				Q4J7Q9	463270	455310	290355	358970	266400	405675	0.231605	fail	fail
Q4J7R1	335550	392990	255980	276110	163690	185270	272480	193180	178780	162320	255020	148870	325210	271880	405290	451490	223560	246580	373450	478480	234720	240950	261870	261820	522790	563090	611770	530220	180140	193040	551400	593670	398820	430580	330200	350870				Q4J7R1	364270	266045	174480	232830	170550	201945	0.137602	fail	fail
Q4J7R2	0	58479	68179	98526	104280	174210	105480	157680	25880	60971	0	104910	57083	40712	82386	94839	49670	125790	42309	87255	70495	95809	44031	86176	0	48366	70839	69185	57482	69431	26297	54818	65404	105720	69445	83055				Q4J7R2	29239.5	83352.5	139245	131580	43425.5	52455	0.813093	fail	fail
Q4J7R4	86867	175040	146330	149260	306510	284130	319250	441530	0	51122	120040	0	189710	229520	307800	76217	128560	0	340890	324320	39616	56564	161030	108890	108970	107040	210350	169350	71916	0	145370	62904	298810	314270	91216	0				Q4J7R4	130954	147795	295320	380390	25561	60020	0.672912	fail	fail
Q4J7R5	0	0	0	0	0	0	0	0	0	0	0	0	0	0	0	0	0	0	0	0	0	0	0	0	0	0	0	0	12471	0	6267.5	0	0	0	0	30934				Q4J7R5	0	0	0	0	0	0	#DIV/0!	#DIV/0!	#DIV/0!
Q4J7R8	2391300	2560600	1918900	1801800	1301200	1384800	1415100	1249600	2449200	2400500	1830000	2243700	1909700	1853700	2115000	1737300	1815400	2070100	1668100	2013800	2111600	2207800	1873200	2205500	2306000	2171700	2200400	1735700	1468300	1431100	2179100	2096000	1678700	1950600	2165100	2335800				Q4J7R8	2475950	1860350	1343000	1332350	2424850	2036850	0.89994	fail	fail
Q4J7S1	312710	306230	375730	385190	377300	361650	397920	338570	328830	270710	315130	310070	413570	302050	328420	235570	319730	329790	325340	302470	366350	328310	427770	386730	441810	309450	411240	306350	361990	330080	486270	458310	303870	226430	545130	507420				Q4J7S1	309470	380460	369475	368245	299770	312600	0.264256	fail	fail
Q4J7S3	147290	74567	114400	0	100370	143840	134880	161110	181040	221020	107190	147710	110010	0	72593	29364	87807	142940	65227	96175	133180	141520	123070	145770	0	67040	148950	157030	139830	139400	144470	157670	61948	57537	166260	161390				Q4J7S3	110928	57200	122105	147995	201030	127450	0.0475383	fail	pass
Q4J7S4	109790	40488	29390	36593	40836	80383	38513	53724	30124	21245	37158	42263	46584	23323	36429	46555	37445	58136	17860	59667	58733	55009	62889	55767	0	47959	29968	36109	52506	24889	59692	61291	45396	0	44985	42933				Q4J7S4	75139	32991.5	60609.5	46118.5	25684.5	39710.5	0.194616	fail	fail
Q4J7S8	544800	490880	621980	619270	526490	502230	772500	508290	469860	477010	686900	662140	671020	651630	459820	433730	480570	569190	564260	536820	624630	568610	595630	497930	814870	771030	688580	568390	628640	632290	382780	428390	597500	520700	686350	597660				Q4J7S8	517840	620625	514360	640395	473435	674520	0.447372	fail	fail
Q4J7T3	0	0	62920	49051	58757	96744	88140	65023	42941	30091	60270	62309	78314	52965	68377	0	81834	48791	0	0	76315	25483	85671	52292	65676	146100	47585	43437	54433	42054	49096	41674	0	0	34763	51348				Q4J7T3	0	55985.5	77750.5	76581.5	36516	61289.5	0.457918	fail	fail
Q4J7T4	403010	387280	361960	411470	542330	387020	343450	342890	332440	331410	406180	435940	664790	660820	1182600	1215000	525680	501230	497210	894660	421090	404070	324830	486430	542350	910230	513000	516860	462200	413190	435510	603230	823040	968600	409470	471200				Q4J7T4	395145	386715	464675	343170	331925	421060	0.147605	fail	fail
Q4J7T5	0	47247	17681	0	92563	0	0	0	20268	45912	28239	7728.8	20817	60117	81926	120900	0	0	0	0	0	0	0	0	54264	0	32442	0	0	63312	35990	0	0	0	94079	40231				Q4J7T5	23623.5	8840.5	46281.5	0	33090	17983.9	0.598171	fail	fail
Q4J7T6	554600	504210	395160	419060	434350	478570	458290	445870	494080	448060	419900	369400	560150	451670	609540	541420	478480	556790	630810	660740	584160	536580	693000	553150	423710	423860	453250	337060	378990	339280	535540	483680	381330	319210	498610	426150				Q4J7T6	529405	407110	456460	452080	471070	394650	0.418176	fail	fail
Q4J7T8	1029100	925980	725900	684650	524630	584660	587260	519330	650400	622240	537790	555700	777560	626480	864250	790310	434860	441200	786170	879540	719650	665470	656050	694660	1050700	1085600	911660	719920	507400	569560	621820	658220	962690	878830	827180	857950				Q4J7T8	977540	705275	554645	553295	636320	546745	0.0706598	fail	fail
Q4J7T9	3785000	3525900	5049100	4765500	6013800	6080200	6062900	6390400	7086100	6944500	4464200	5663200	6125200	3936100	2976300	1414200	4550100	6440200	3882400	4080800	5201900	6098600	6422500	6255200	2968200	2515200	4040900	2684000	3749400	4275700	4332000	4146500	1997600	1258700	4112100	3890000				Q4J7T9	3655450	4907300	6047000	6226650	7015300	5063700	0.0632755	fail	fail
Q4J7U0	2255700	2858100	2774200	3005800	2910800	3341400	2479700	2766800	2484100	2333800	3075000	3259200	2845300	2654900	4023200	4296900	2510300	3026500	3171700	3578500	3165800	3207100	2741400	2888400	3091700	3549500	3102400	2882800	2924600	3105500	2931400	3036300	2586300	3461400	2838700	2991300				Q4J7U0	2556900	2890000	3126100	2623250	2408950	3167100	0.56414	fail	fail
Q4J7U2	27785	42190	45130	43728	72661	91915	58113	70780	25709	26732	32906	43120	27275	32173	47405	77625	34384	61292	32248	56890	33780	61232	22311	54971	30474	0	19078	23336	41979	55004	58113	67623	0	0	27931	56814				Q4J7U2	34987.5	44429	82288	64446.5	26220.5	38013	0.387957	fail	fail
Q4J7U3	359280	446390	770470	697650	608130	605200	680780	654800	534130	450120	835070	806720	930810	710380	416340	843080	539560	751820	678650	906490	779930	598670	906380	794130	1063600	916230	1182000	864750	920840	717730	953790	802570	319240	1087100	837630	779460				Q4J7U3	402835	734060	606665	667790	492125	820895	0.388291	fail	fail
Q4J7U5	554380	493180	319300	305120	490330	650850	591090	580330	337170	328050	317660	375610	407940	310390	231890	216240	310070	432400	354340	413820	337900	372110	386650	374630	285100	176170	328650	235910	271970	321740	294310	367510	384940	356120	270100	227680				Q4J7U5	523780	312210	570590	585710	332610	346635	0.54851	fail	fail
Q4J7U6	0	33302	41317	23349	40201	73270	38339	43733	12419	0	28166	62437	0	0	49837	85617	26281	0	0	55383	55866	82911	33920	40242	29313	16040	0	26836	22814	49582	56125	65942	0	70121	18000	38726				Q4J7U6	16651	32333	56735.5	41036	6209.5	45301.5	0.750503	fail	fail
Q4J7U8	701630	582700	691720	764470	810060	856030	662890	684510	790730	645500	906930	975830	973960	822530	1029900	1084900	927900	1142100	738390	709560	902020	960440	1003800	928710	696590	715810	604350	624530	911600	981390	951150	1015000	597210	648450	841480	833210				Q4J7U8	642165	728095	833045	673700	718115	941380	0.544358	fail	fail
Q4J7U9	597750	401410	746340	730150	701650	941020	957910	878090	663190	708250	722520	833960	838750	677260	718700	204580	636420	845650	643770	507530	951120	764280	987150	797150	762660	609880	712330	516700	910290	766420	1019300	853360	462730	314400	919060	713950				Q4J7U9	499580	738245	821335	918000	685720	778240	0.242177	fail	fail
Q4J7V0	1067200	931440	911040	932970	783440	948560	877260	693290	753490	626010	886900	791280	1076500	722680	973110	1090300	594280	652910	912920	894330	814880	811590	881740	780030	1076700	934040	1033600	774930	726780	820230	951250	956640	648750	1065900	922800	822920				Q4J7V0	999320	922005	866000	785275	689750	839090	0.0179991	fail	pass
Q4J7V1	0	0	0	0	0	0	0	0	0	0	0	0	0	0	0	0	0	0	0	0	0	0	0	0	0	0	0	0	0	0	0	0	0	0	0	0				Q4J7V1	0	0	0	0	0	0	#DIV/0!	#DIV/0!	#DIV/0!
Q4J7V2	628150	754620	1772800	1737400	302310	284180	242510	227030	442140	439520	1497200	1671800	920190	748120	970320	772710	574590	474590	940470	943800	739820	701690	781860	832560	864110	877390	865310	697550	549670	508340	710770	679940	753760	827070	750330	583960				Q4J7V2	691385	1755100	293245	234770	440830	1584500	0.685951	fail	fail
Q4J7V3	0	0	0	0	0	0	0	0	0	0	0	0	0	0	0	0	0	0	0	0	0	0	0	0	0	0	0	0	0	0	0	0	0	0	0	0				Q4J7V3	0	0	0	0	0	0	#DIV/0!	#DIV/0!	#DIV/0!
Q4J7V9	1012400	1276600	1704200	1401600	1315700	2531300	1418800	1300300	1301100	1425900	1995100	1263000	1629700	1747100	1933900	1643400	2057300	1394200	1697700	1589900	1039600	1163400	1246800	898160	1306000	1751600	1330600	1464000	1563900	1142200	1700000	1363500	2476400	2691300	1333000	1298800				Q4J7V9	1144500	1552900	1923500	1359550	1363500	1629050	0.722513	fail	fail
Q4J7W0	1000700	1086500	993380	1140800	878570	1095700	984170	832620	860620	788500	1159200	1217500	1283200	1084300	1339200	1648400	1008600	1194400	1380000	1434500	1296700	1192100	1362900	1192200	1459500	1556100	1425900	1219700	1151100	1063800	1411800	1298500	1488000	1557500	1302000	1300300				Q4J7W0	1043600	1067090	987135	908395	824560	1188350	0.493706	fail	fail
Q4J7W1	1132300	1183100	610910	481030	409940	145950	540590	484520	627440	496130	588350	341830	1229600	787640	1249300	584670	678360	315400	841230	616040	353070	328390	698670	614470	825190	591410	1005500	451160	512740	311540	805470	470070	1261200	1442200	630080	267190				Q4J7W1	1157700	545970	277945	512555	561785	465090	0.416646	fail	fail
Q4J7W4	139120	0	92662	158600	120730	0	46543	243520	60003	0	50943	0	126440	0	84683	0	123150	0	141760	0	0	125070	132200	112950	0	0	0	0	0	46670	160760	75302	0	0	0	0				Q4J7W4	69560	125631	60365	145032	30001.5	25471.5	0.701672	fail	fail
Q4J7W6	732140	809220	1146200	1203000	1013400	1027600	1251700	1147600	898030	942610	1187200	1023800	1171600	1027000	761020	788250	1086300	1148800	1086300	1178700	1329500	1211400	1177900	1204300	1232500	1366300	1323800	953240	1163700	1025000	1198500	1385000	963870	917830	1446100	1355600				Q4J7W6	770680	1174600	1020500	1199650	920320	1105500	0.384214	fail	fail
Q4J7W7	167420	343410	686340	646020	1064200	952070	589320	665370	361300	369870	1056900	934650	1156700	1024000	965840	937660	571700	690130	826540	907590	598450	629160	515560	494920	1247100	1820300	1138800	1159600	673030	788920	1062600	972010	669070	1093900	949930	1150200				Q4J7W7	255415	666180	1008135	627345	365585	995775	0.916471	fail	fail
Q4J7W8	122650	212910	330430	366270	283520	372320	363600	278650	273950	301170	295070	324190	210270	255420	347550	261700	227760	316740	208390	364610	346150	357210	362590	376700	259510	351090	216380	232690	274370	292030	396630	329500	149100	190100	333420	367710				Q4J7W8	167780	348350	327920	321125	287560	309630	0.570155	fail	fail
Q4J7X0	758480	778310	826650	848210	680640	636870	914550	768030	626150	578510	820290	730810	1553800	1295800	1239000	1556500	863220	823120	1350900	1223400	989690	868300	1148200	1005700	1491400	1536500	327850	332970	742040	611950	292830	285660	1335000	1241500	1103700	1051700				Q4J7X0	768395	837430	658755	841290	602330	775550	0.808251	fail	fail
Q4J7X1	225530	239310	182710	232030	327780	416020	2420700	2494300	1386500	1193700	1976900	2450900	2316500	2149000	1500400	1695700	1385800	1793500	156330	160270	65692	154920	88041	103730	342980	450640	758840	689290	1708900	1717400	255330	260940	147670	139010	133630	234850				Q4J7X1	232420	207370	371900	2457500	1290100	2213900	2.79704e-05	pass	pass
Q4J7X2	4515600	3777500	11400000	12138000	7770600	6872200	9176400	9494900	7702300	6620500	8585300	8439200	7940500	7201500	6478600	4165900	5968800	7392600	8888400	6582100	10109000	9360600	15342000	14188000	7970700	5186200	4075400	2936400	7370300	6988300	5218900	4169700	3266600	1757300	8507000	8238200				Q4J7X2	4146550	11769000	7321400	9335650	7161400	8512250	0.696724	fail	fail
Q4J7X3	0	0	0	0	0	0	0	0	0	0	0	0	0	0	0	0	0	0	0	0	0	0	0	0	0	0	0	0	0	0	0	0	0	0	0	0				Q4J7X3	0	0	0	0	0	0	#DIV/0!	#DIV/0!	#DIV/0!
Q4J7X4	1214200	1168800	814690	865690	661690	816580	472690	526570	604690	690550	600670	661180	1026300	1050500	1228600	1419100	625680	729190	1225700	1340700	926480	1016200	987180	1021900	1186400	1306100	959100	821060	762800	799400	887940	1069100	1499400	1621600	909480	934340				Q4J7X4	1191500	840190	739135	499630	647620	630925	0.00604059	pass	pass
Q4J7X5	241530	306860	224980	219080	293810	201990	238030	255030	199960	201340	218440	196200	254470	245430	342190	375770	155900	169890	287230	335890	262950	216750	240030	263680	349270	394160	324730	296790	231920	201110	329000	351350	397400	373300	269620	324290				Q4J7X5	274195	222030	247900	246530	200650	207320	0.165127	fail	fail
Q4J7Y3	2124600	1965500	2036200	1841100	1669500	1920200	1853100	1585500	1812800	1633300	1947000	1902600	2449400	2174800	2566200	2710000	1737000	1669800	2673800	2552300	2404400	2116900	2494200	2280500	2890000	2769100	2354600	1845200	1794600	1690400	1778100	1823000	2489900	2226600	2528600	2388400				Q4J7Y3	2045050	1938650	1794850	1719300	1723050	1924800	0.151835	fail	fail
Q4J7Y4	0	0	40636	0	69210	0	53815	0	0	47692	0	0	0	0	0	0	79329	0	65828	0	162940	0	0	14991	0	0	0	0	81969	0	0	0	0	0	0	0				Q4J7Y4	0	20318	34605	26907.5	23846	0	0.933369	fail	fail
Q4J7Y5	89135	81511	82455	92094	59743	121240	114700	91186	61328	0	86386	17857	0	66144	122770	122270	49276	0	146750	0	22137	0	105260	0	117990	167920	116890	0	10308	88450	0	127950	0	193400	19460	125840				Q4J7Y5	85323	87274.5	90491.5	102943	30664	52121.5	0.226491	fail	fail
Q4J7Y7	1432300	965340	1634700	1733800	1614500	1878400	2161300	1647900	1793900	1577800	1728400	1932000	1742100	1331900	0	405740	1546200	1805700	599330	1552500	2024700	2091900	2075000	1880400	2070500	1468100	2144700	1763000	1798900	1739700	2029800	1796100	0	0	2357300	2274400				Q4J7Y7	1198820	1684250	1746450	1904600	1685850	1830200	0.122643	fail	fail
Q4J7Z2	2268700	1948800	1009900	970970	870270	701440	694060	561130	1399000	1330800	832100	814740	1268700	1060600	1008900	1063600	716340	677430	1208000	1184000	1078100	977770	1204300	1094500	1061700	757250	945830	827070	768150	674360	687860	752050	719140	971370	1237000	1119500				Q4J7Z2	2108750	990435	785855	627595	1364900	823420	0.261426	fail	fail
Q4J7Z4	938710	1758100	755060	850940	189380	293650	241200	265250	888480	1128900	702460	828680	975580	1253200	1627000	1585100	767860	1120800	767920	1210500	787910	1069500	671650	810680	2076200	3161800	1644900	2060600	922230	1083600	1252900	1535000	1924500	2865000	1956400	2560700				Q4J7Z4	1348405	803000	241515	253225	1008690	765570	0.662652	fail	fail
Q4J7Z5	173310	315300	363960	484890	368960	526380	311860	432250	250960	267590	407650	477330	415410	374900	518610	520150	160120	387070	445080	512770	438970	539750	317640	388350	502800	623290	399960	377340	322570	354020	503960	499780	359990	490160	412860	478700				Q4J7Z5	244305	424425	447670	372055	259275	442490	0.829257	fail	fail
Q4J7Z6	303410	293730	380510	392930	496550	537890	514220	454540	361930	321570	523590	535140	496570	441800	578470	621640	448590	468890	412980	438930	484180	469770	457930	366780	433890	539110	424940	355740	457450	479150	485600	490920	349870	323030	455010	406310				Q4J7Z6	298570	386720	517220	484380	341750	529365	0.374842	fail	fail
Q4J7Z7	190950	174370	335360	323350	357510	386060	397450	333350	263650	202320	374570	371620	423370	354790	391490	308140	295480	271160	396120	362260	338270	306420	342590	292520	382230	453010	403730	301780	347350	270320	444970	418530	383150	297290	362090	353030				Q4J7Z7	182660	329355	371785	365400	232985	373095	0.555176	fail	fail
Q4J7Z8	205330	301910	193300	239660	265560	259050	294770	274740	234500	205740	253680	213750	445870	367530	476400	474850	262460	270060	357900	417850	277540	293670	277710	319790	433900	476790	444810	383580	290990	265790	373360	411070	427700	308440	346100	333430				Q4J7Z8	253620	216480	262305	284755	220120	233715	0.926339	fail	fail
Q4J800	1007800	829260	940000	925600	642160	518500	624170	594370	615200	513260	751930	637660	1077400	760050	1243900	1379700	690490	567950	1416000	1415300	896210	730590	1221100	1175100	1976300	2101900	1415200	1152200	661850	412580	1061800	935090	1190400	1309400	1265500	734650				Q4J800	918530	932800	580330	609270	564230	694795	0.0498081	fail	pass
Q4J801	0	0	21493	29849	37070	24773	60877	40936	0	9677.6	80173	110070	92292	67979	119810	126240	42957	115070	0	105400	45334	21443	31855	22522	62636	83008	43240	38276	99682	110140	47074	87038	0	28749	68534	29408				Q4J801	0	25671	30921.5	50906.5	4838.8	95121.5	0.116756	fail	fail
Q4J802	77762	81756	89568	105400	109000	140970	99890	113490	83437	75374	105080	122240	83859	83564	108400	99223	98183	157820	83012	112870	147550	137150	118120	129010	141310	146950	129190	108640	134360	119710	128730	160820	92148	122540	183160	163060				Q4J802	79759	97484	124985	106690	79405.5	113660	0.946503	fail	fail
Q4J803	810880	872060	633510	671010	522350	421110	561760	567400	479740	505100	644250	619250	1002400	1001500	1409100	1472000	759230	750330	1224100	1263400	765740	809340	820530	885210	1598200	1624100	1208700	1074400	830720	908950	1055800	1143700	1740300	1702100	994500	993740				Q4J803	841470	652260	471730	564580	492420	631750	0.241307	fail	fail
Q4J804	0	0	0	0	0	132510	0	0	0	0	0	34675	0	0	0	0	0	51470	0	0	137510	129070	0	115300	0	0	0	0	90007	116590	140930	102600	0	0	144950	108570				Q4J804	0	0	66255	0	0	17337.5	0.491395	fail	fail
Q4J805	0	0	0	28593	15682	31315	0	0	10630	24778	36118	50937	54938	12240	22381	17959	66845	67846	28820	0	39838	8570.6	23639	20841	0	0	26432	0	70758	65857	33326	32831	0	44447	38370	27698				Q4J805	0	14296.5	23498.5	0	17704	43527.5	0.468085	fail	fail
Q4J806	306980	315280	216570	199300	273250	296610	342450	233230	300260	176540	257810	247160	336800	266720	232760	259120	204000	219310	310230	277200	241520	329460	231550	203620	229080	271150	391660	209720	257490	267390	274560	221680	373930	312360	285540	244180				Q4J806	311130	207935	284930	287840	238400	252485	0.789238	fail	fail
Q4J808	201670	130360	171520	105320	238520	237780	64239	140140	181790	158570	107520	71342	83840	85301	116120	265040	86247	114230	76709	91454	189430	224620	250500	165240	0	64575	108680	101980	80170	116580	192760	98984	121020	116840	156800	107610				Q4J808	166015	138420	238150	102190	170180	89431	0.0709083	fail	fail
Q4J809	5137800	4624000	4273000	4265000	4642800	5111100	4165400	3915200	4873600	4575200	4123900	3999500	5197200	4138000	5195700	5383000	3638200	4285600	5482300	5382400	5143400	5377800	5705300	5214000	5615500	5107500	4329900	3628300	3945100	4105900	4726000	4928500	3742700	3464500	5054900	4848300				Q4J809	4880900	4269000	4876950	4040300	4724400	4061700	0.096361	fail	fail
Q4J810	4737800	4196900	3003900	3115600	4093300	4061100	4915700	4932500	4174600	4130600	3079500	2818900	3460500	2934400	3475800	4315900	2632800	2946700	3327900	3439300	3871900	3066600	3691600	3091500	3780900	3766300	3428200	2456300	2712100	2609400	3298700	3079100	4008800	4199200	3629700	3510800				Q4J810	4467350	3059750	4077200	4924100	4152600	2949200	0.764718	fail	fail
Q4J811	3020800	2775800	2722900	2690000	3495300	3399400	4302000	4135400	3234400	2831300	2239500	1830900	2776900	2166100	1915900	1956600	2325800	2439400	2393100	2337000	2712500	2622700	3622500	3250300	3234400	2801100	2792800	1834800	2237300	1899900	2556900	2593500	2284400	2011300	2880000	3007800				Q4J811	2898300	2706450	3447350	4218700	3032850	2035200	0.859766	fail	fail
Q4J812	810150	488770	2491900	2354600	2060800	1746300	2501000	2246500	2479600	1821000	1469100	1943800	1702000	1498600	1058000	1179300	2028800	2332900	908150	1607100	2061900	1801400	2459100	2858900	1545900	767170	2490100	1278600	2527700	1498500	2097600	1362600	882420	0	1642100	1978300				Q4J812	649460	2423250	1903550	2373750	2150300	1706450	0.293198	fail	fail
Q4J813	491910	583780	931650	976020	704090	585320	1478900	1227200	991300	1363800	632960	489550	489200	513850	289250	381770	507540	637050	298050	261410	938830	838210	517920	570740	700170	375110	735820	269990	368400	701020	569050	657410	337750	206320	600270	833140				Q4J813	537845	953835	644705	1353050	1177550	561255	0.111993	fail	fail
Q4J814	2629300	1711900	493370	525130	582290	517400	1004200	916900	749500	836230	499290	452800	1304300	1020300	1244600	1166600	653640	416920	1106000	944380	662890	424730	411260	523020	626660	723040	1010300	723320	354530	287680	530310	445430	2017600	1777100	293600	250250				Q4J814	2170600	509250	549845	960550	792865	476045	0.397402	fail	fail
Q4J815	103190	134450	193110	195020	148320	158690	158820	143360	129480	131080	208440	200880	202790	190530	81320	289410	179410	184570	233360	241390	206690	170660	206060	200030	216220	236430	187170	176480	196670	182700	243180	244250	250280	194810	193290	179060				Q4J815	118820	194065	153505	151090	130280	204660	0.752698	fail	fail
Q4J816	17898000	13866000	17512000	19346000	18868000	19803000	23851000	20717000	16057000	17213000	18490000	18611000	22601000	17693000	19738000	14402000	16759000	17475000	16907000	14312000	19956000	18264000	20486000	19551000	17820000	18797000	22481000	16599000	18225000	15415000	19621000	19991000	18451000	19058000	22027000	20325000				Q4J816	15882000	18429000	19335500	22284000	16635000	18550500	0.394987	fail	fail
Q4J817	348610	340290	471820	454830	523920	390130	506080	414950	441980	377280	587790	500920	393340	364410	385620	543520	488700	486450	389830	289670	583330	505230	589920	524110	408220	499920	499540	415730	537850	500510	506260	432150	381050	487910	625780	449840				Q4J817	344450	463325	457025	460515	409630	544355	0.273164	fail	fail
Q4J818	345630	347870	261930	260750	151690	126890	238490	181700	182550	136920	227170	171480	291390	262860	290400	260890	170600	120490	0	0	161030	147940	257200	179700	381200	344470	350630	225310	365220	243760	259950	205140	426620	375020	203320	210570				Q4J818	346750	261340	139290	210095	159735	199325	0.179471	fail	fail
Q4J819	2019200	1714000	1887200	1681400	2056100	1999600	1809100	1834000	1617800	1388200	2077500	1605700	2365200	2106400	2120000	2595600	1798000	1793000	2393800	2455800	1916800	1619200	2142500	2032800	2589500	2351600	2366500	1818200	2015000	1713500	2119000	2055900	2488700	2029400	1951100	1646100				Q4J819	1866600	1784300	2027850	1821550	1503000	1841600	0.176013	fail	fail
Q4J823	280960	347500	333470	447720	369370	381410	668980	415630	328280	377820	408740	459010	506340	331020	538730	477580	367190	462410	267940	427340	378380	452220	437730	445460	456570	513660	409220	360670	365280	455500	427270	553280	285080	453550	426470	372500				Q4J823	314230	390595	375390	542305	353050	433875	0.152122	fail	fail
Q4J824	291790	148480	105190	95812	118470	140780	161220	166860	380690	350570	180160	185720	286180	272690	231330	388470	201640	226810	138770	152230	90049	153010	128230	128310	124630	102680	158110	108510	209250	228580	145050	159830	205320	128210	98379	96424				Q4J824	220135	100501	129625	164040	365630	182940	0.113357	fail	fail
Q4J825	1387300	1238900	808540	836590	1024700	858330	933260	844800	1179700	868900	891090	898500	1022700	869540	724270	506990	908560	990180	1013800	1009500	920860	925310	1181700	1038000	705130	771180	789460	334610	739700	701900	1006000	954790	579380	627040	677250	554750				Q4J825	1313100	822565	941515	889030	1024300	894795	0.433747	fail	fail
Q4J827	7932800	7838700	6431300	5976200	11268000	8776200	7257200	7457200	11902000	11524000	9734800	8889600	6683200	5108200	3624200	2385200	13658000	12622000	9230200	5372300	5994400	6573700	7595300	6462700	5766700	5133000	4975000	4506000	7273800	9487400	6771200	6644000	4838700	3028400	7762700	6318800				Q4J827	7885750	6203750	10022100	7357200	11713000	9312200	0.230837	fail	fail
Q4J832	521110	645990	1186700	1059300	936740	1259300	1107300	963040	734630	629880	1200700	1417500	1324600	1080300	1268000	1176200	1117000	1349400	1215100	1185800	1311600	1356200	1334300	1212200	1272100	1239600	1255900	1080500	1082600	1161800	1469300	1450400	1005700	1130600	1370600	1289400				Q4J832	583550	1123000	1098020	1035170	682255	1309100	0.673745	fail	fail
Q4J833	3327000	3343100	3286600	3189900	2930700	3379600	2926800	2599300	2895300	2842100	2880700	3182500	2339800	2224000	2564900	2861400	2295500	2933500	2805900	3119300	3260600	3171600	3366900	3508300	2963000	2827800	2907500	2296200	2826000	2708100	3503200	3258100	3074600	3030700	3170800	3396200				Q4J833	3335050	3238250	3155150	2763050	2868700	3031600	0.00589555	pass	pass
Q4J835	0	0	22989	0	0	0	72990	0	0	0	18936	0	0	0	0	0	0	0	0	0	27778	0	33278	0	0	0	0	0	0	0	0	0	0	0	36972	46887				Q4J835	0	11494.5	0	36495	0	9468	0.38114	fail	fail
Q4J836	1498200	1438200	2714200	2858100	2226500	2660700	2805700	2481500	1499200	1363800	2787800	3092000	3618200	3122100	4091700	4171100	2651900	2968200	3481000	3801900	3058400	3229800	3336600	3200200	3261000	3573400	3078700	2548500	2541200	2715400	3231300	3489700	3407800	3036900	2684400	2936600				Q4J836	1468200	2786150	2443600	2643600	1431500	2939900	0.793598	fail	fail
Q4J837	952150	838220	1850300	1784200	2300700	2008100	2091600	1993600	1209200	1190400	2177200	2236600	1705500	1756900	1095400	1089400	1796600	2325300	1783900	2040500	2112000	2121800	2073900	2156200	1508300	1473800	1505500	1317000	1747700	1650000	1735800	1877400	1060900	908670	1769200	1818300				Q4J837	895185	1817250	2154400	2042600	1199800	2206900	0.54803	fail	fail
Q4J838	6880000	7395900	6342500	6696000	4037800	4811400	4589300	4004600	3799400	3488200	4846700	4825900	8258500	6756000	9100600	9165200	4535000	4743100	9294400	9517500	6601300	6158000	8701100	7606900	8764500	8792400	8295700	6954500	5093500	4462300	7407700	7704000	9179000	8465400	6727300	6111800				Q4J838	7137950	6519250	4424600	4296950	3643800	4836300	0.0127162	fail	pass
Q4J843	0	0	0	0	0	0	0	0	0	0	0	0	0	0	0	0	0	0	0	0	0	0	0	0	0	0	0	0	0	0	0	0	0	0	0	0				Q4J843	0	0	0	0	0	0	#DIV/0!	#DIV/0!	#DIV/0!
Q4J844	75181	0	91655	28361	85230	0	74946	90281	38037	52781	31980	73795	146680	70520	0	0	112570	181370	22654	0	172070	127190	118250	87490	0	22711	40655	34210	57154	33473	86901	52475	0	0	75109	32323				Q4J844	37590.5	60008	42615	82613.5	45409	52887.5	0.50712	fail	fail
Q4J846	91391	78016	180470	161710	201340	0	240140	162380	160090	173410	181900	69192	154550	106260	0	0	265940	0	92125	72083	214120	32974	223560	0	119570	0	153130	39459	206380	0	182340	97209	0	0	226630	184100				Q4J846	84703.5	171090	100670	201260	166750	125546	0.261312	fail	fail
Q4J847	731130	893500	638220	570740	389990	533340	462670	322050	529460	456870	530890	443300	585870	641080	849270	973300	564540	842810	768660	897090	750660	684840	652640	662250	915070	917600	740610	699770	652330	822190	687640	819220	841070	1018300	748870	806470				Q4J847	812315	604480	461665	392360	493165	487095	0.0541161	fail	fail
Q4J849	891520	1091200	850960	896720	563990	514750	544120	566090	731570	641500	782900	787250	887880	913130	856170	1175100	524490	736250	774770	1259700	674040	834530	685940	910390	1048500	1319700	827490	758870	650620	611830	534170	524690	1240500	1353600	723550	1008800				Q4J849	991360	873840	539370	555105	686535	785075	0.236253	fail	fail
Q4J850	413510	507170	407700	362600	305630	289570	263990	230770	330280	284990	358240	191170	384470	358100	592370	500800	306030	245100	527230	628880	448510	386100	397090	394100	335260	355210	312480	198720	313040	279160	398440	383600	514320	501370	338480	321090				Q4J850	460340	385150	297600	247380	307635	274705	0.0300014	fail	pass
Q4J851	1036900	1520600	971390	898930	989900	1106900	765730	885490	1643700	1761500	778330	988510	832770	911440	1721300	1636800	939590	922880	1369500	1243400	936050	0	903040	1016800	1459600	1419400	931900	898880	1425900	882140	1169100	1491900	919900	0	842420	124160				Q4J851	1278750	935160	1048400	825610	1702600	883420	0.81211	fail	fail
Q4J852	74901	0	193260	158690	161570	92375	79820	117670	105140	126750	179410	121930	108300	96684	144550	117250	105190	113230	87095	188780	165010	80321	72680	183090	93245	261660	65415	0	126960	135290	83113	102420	62886	303820	103440	106000				Q4J852	37450.5	175975	126972	98745	115945	150670	0.800796	fail	fail
Q4J853	1385400	1584200	1655200	1254900	1199400	939570	1396200	1355900	1157500	1280400	1251000	1138300	1135300	920970	1070500	726670	1238000	1070800	1236600	1539800	1224500	1164600	1479300	1335300	1489200	1382100	1154400	1067100	1066300	971340	1391900	1030700	1298300	1566900	1252200	1186200				Q4J853	1484800	1455050	1069485	1376050	1218950	1194650	0.541104	fail	fail
Q4J854	1665500	1437500	916710	999670	747620	961180	1069900	922600	961060	900230	996670	962640	1415000	1194600	1958700	1797600	798320	929180	1571500	1430000	1028400	1004700	926050	1106700	1590400	1619000	1176500	928930	851690	857090	735730	746420	2042000	1840700	1033400	1077500				Q4J854	1551500	958190	854400	996250	930645	979655	0.31954	fail	fail
Q4J855	248280	231140	343780	335420	342130	350040	408980	392030	218240	195240	371280	317830	449870	418860	432990	404950	361190	370200	344860	406750	379380	411220	429800	378570	419850	448010	371080	324040	330820	345850	351990	310560	369540	264670	321960	288660				Q4J855	239710	339600	346085	400505	206740	344555	0.842731	fail	fail
Q4J856	0	0	0	0	98460	0	75430	81983	0	0	0	0	0	0	0	0	0	0	0	0	0	0	0	0	0	0	0	0	0	0	0	0	0	0	0	0				Q4J856	0	0	49230	78706.5	0	0	0.682835	fail	fail
Q4J857	11117000	11380000	11666000	11080000	10745000	10780000	11737000	10197000	9940300	9381700	11807000	10736000	14140000	11277000	12217000	15233000	10277000	10221000	14852000	15860000	12564000	11426000	12693000	12420000	13313000	13359000	12915000	11389000	10642000	9522300	13042000	13488000	13371000	13384000	11120000	10064000				Q4J857	11248500	11373000	10762500	10967000	9661000	11271500	0.273301	fail	fail
Q4J858	0	0	56725	97963	40138	138670	90966	53429	70635	61332	85524	75400	0	55642	0	54724	30855	32243	47259	55346	0	0	0	66997	101230	123250	71531	0	51923	0	53162	57237	0	95515	52044	144460				Q4J858	0	77344	89404	72197.5	65983.5	80462	0.472809	fail	fail
Q4J860	4693200	4321200	3751700	3553400	4094100	4418100	4118400	3715100	3234700	3051300	3718400	3537300	4047500	3721500	5204100	5268600	3251800	3589900	4414800	4974300	4050000	3986600	4402700	4095800	5274900	4861600	4366600	3749800	3353500	3143400	4023100	4223200	5329800	4288700	4213300	3813700				Q4J860	4507200	3652550	4256100	3916750	3143000	3627850	0.0334179	fail	pass
Q4J862	528250	529900	460850	503470	522020	466520	431450	294530	560250	418470	472480	407560	555790	530370	622040	495300	471340	516560	505850	510800	470600	407730	610770	466500	607930	642260	524110	492740	580330	425660	659950	561720	599720	528270	579170	544490				Q4J862	529075	482160	494270	362990	489360	440020	0.0886727	fail	fail
Q4J863	2256200	2970100	1566100	1569900	1419400	1238100	1527600	1354700	2127100	1829700	1262600	1135200	1767900	1169600	2571400	2222500	1244800	1259900	1803500	2002000	1913100	1688500	2036200	1553800	4048500	3640600	3177500	2265800	1380200	1095600	1599700	1456500	2239500	2968600	2976500	3000800				Q4J863	2613150	1568000	1328750	1441150	1978400	1198900	0.35704	fail	fail
Q4J864	0	0	12892	0	0	0	10593	0	23262	23171	0	0	0	0	0	0	9402.8	4829.9	0	0	5726	7347.4	12763	14657	0	0	0	0	10205	5856.3	9969.2	0	0	0	21374	11436				Q4J864	0	6446	0	5296.5	23216.5	0	0.181433	fail	fail
Q4J865	816180	758760	764950	792490	605360	641200	607020	466790	566760	570280	775050	821350	1139800	1064500	991820	830650	645610	744200	1238800	1342200	1014300	953800	966700	990510	1310500	1531600	1118900	996820	787060	827370	1166000	1263500	941690	858500	1286100	1298900				Q4J865	787470	778720	623280	536905	568520	798200	0.176959	fail	fail
Q4J866	0	0	0	0	0	0	0	0	0	0	0	0	0	0	0	0	0	0	0	0	0	0	0	0	0	0	0	0	0	0	0	0	0	0	0	0				Q4J866	0	0	0	0	0	0	#DIV/0!	#DIV/0!	#DIV/0!
Q4J868	0	0	0	0	18673	0	115470	0	0	0	0	0	0	0	0	79513	0	68597	0	0	0	0	0	60975	0	0	0	0	82352	55526	0	0	0	0	0	92506				Q4J868	0	0	9336.5	57735	0	0	0.42724	fail	fail
Q4J869	767730	420930	435850	410860	449680	453790	369670	477730	507870	525120	569660	767730	524900	393090	307630	402820	490310	470640	567220	395330	235550	496900	584980	469930	450530	282200	344450	399190	351440	626140	1061800	443690	456860	323730	429740	400340				Q4J869	594330	423355	451735	423700	516495	668695	0.562631	fail	fail
Q4J870	323070	329550	773190	822070	582490	677600	571130	600700	552260	546440	737460	793220	665260	600920	340730	253760	447830	567240	561050	532030	915140	787180	631110	654470	696400	588420	670930	506670	855160	823010	594690	644570	305160	262950	819460	711060				Q4J870	326310	797630	630045	585915	549350	765340	0.629595	fail	fail
Q4J871	533950	462290	619610	667500	575560	641740	683990	600580	432590	567040	729060	726430	655890	518770	429240	529670	552160	847070	593730	519300	614130	664080	900580	662780	641330	738250	672960	505360	657330	732410	719790	788830	718260	366370	656550	754910				Q4J871	498120	643555	608650	642285	499815	727745	0.494059	fail	fail
Q4J872	340630	541800	388230	561880	544730	634900	505580	561860	562200	522130	544320	631490	560320	476420	853880	1065600	564110	692830	666480	880410	489800	592870	465650	586380	391200	768670	451390	697330	593610	660960	743270	811020	790300	1091800	425230	592890				Q4J872	441215	475055	589815	533720	542165	587905	0.312339	fail	fail
Q4J873	61084	36181	62133	31799	23807	16214	36075	34724	45870	39347	0	24239	67534	49545	0	55288	39524	56753	88343	85377	41492	36699	47617	59461	54214	0	80217	84112	44695	42221	66712	62925	0	101270	73089	62533				Q4J873	48632.5	46966	20010.5	35399.5	42608.5	12119.5	0.427417	fail	fail
Q4JBP2	21138	0	0	0	0	0	0	0	0	0	0	0	0	0	0	0	0	0	0	0	0	0	0	0	0	0	0	0	0	0	0	0	0	0	0	0				Q4JBP2	10569	0	0	0	0	0	0.340893	fail	fail
Q4J875	1167300	1092900	1006400	1063100	660480	873620	891550	818560	741290	820810	905350	965600	1048700	1005700	1584400	1888700	795030	1030900	1202000	1401200	1172500	1202400	1108800	1153900	1563600	1923500	1445600	1319800	1020600	1052000	1269600	1466000	1503500	1512600	1293700	1410900				Q4J875	1130100	1034750	767050	855055	781050	935475	0.172335	fail	fail
Q4J876	882710	689880	2188800	2852400	889250	1478300	1405800	1924800	1476900	958490	2136600	3646800	575190	880020	640850	1228100	692000	1272200	606880	738890	1066900	1322500	849220	1192800	1582100	2033400	1224800	1817400	1416500	2325400	947030	1829000	800680	1171600	1336900	2426600				Q4J876	786295	2520600	1183775	1665300	1217695	2891700	0.430089	fail	fail
Q4J877	220340	173300	149240	243510	221240	193570	197810	111370	296430	269460	209010	220340	186220	182660	147990	78576	196810	203900	190540	211130	171220	274340	244360	276600	224940	310430	225890	205370	156400	244810	287740	320530	238470	196950	164270	276570				Q4J877	196820	196375	207405	154590	282945	214675	0.577269	fail	fail
Q4J879	1597300	1474800	2016600	1601100	1873600	1580400	2474300	1787300	1920600	1792700	2119300	1970000	1884100	1491800	2173900	2141100	2057100	1640600	1919800	1833800	1986500	1772100	2347500	1765600	1934800	1814000	1879000	1331600	1649500	1617100	1888100	1961700	1879500	1798500	2055500	1567100				Q4J879	1536050	1808850	1727000	2130800	1856650	2044650	0.0395635	fail	pass
Q4J881	88007	42466	52820	72816	125490	139240	262130	266720	136020	144860	396540	412250	417730	241110	256140	308040	356210	376800	83544	73907	57155	55021	72147	60599	93054	78767	0	75226	300340	294080	68130	58266	54143	40257	47339	35129				Q4J881	65236.5	62818	132365	264425	140440	404395	0.0048514	pass	pass
Q4J882	955600	1037700	1389700	1277200	863450	1033900	1059600	951590	1094000	1169500	1251400	1285100	1268300	1087000	1117900	1058400	1042300	1212100	1289900	1359500	1283000	1305400	1437400	1255400	1503900	1556800	1403100	1145500	1306000	1307400	1455500	1478700	1146100	957020	1433600	1387900				Q4J882	996650	1333450	948675	1005595	1131750	1268250	0.670094	fail	fail
Q4J883	2417700	2623000	3222900	3421300	2964400	3471500	3326600	3517300	2627900	2472100	2804200	3346100	3807900	2886300	4274300	4774300	3175600	3682600	4072200	4465700	3741900	4018300	4843000	4315800	3480100	3932100	3608200	2604100	3752700	3413500	4191500	4074500	3931100	3633800	3573600	3487100				Q4J883	2520350	3322100	3217950	3421950	2550000	3075150	0.98621	fail	fail
Q4J888	117820	258000	134480	123350	57714	43678	48516	75861	220100	200500	124280	94952	95311	76768	0	191630	91583	73907	243910	501030	154340	126800	142280	92785	143860	170270	498610	231250	164240	141680	176820	153830	161100	136800	119770	108860				Q4J888	187910	128915	50696	62188.5	210300	109616	0.910059	fail	fail
Q4J890	223550	101530	35562	0	89084	42997	66524	0	128180	112760	112980	98223	72209	0	0	0	214820	126100	0	0	0	0	0	0	0	0	0	0	81673	117160	44508	46136	0	0	0	0				Q4J890	162540	17781	66040.5	33262	120470	105602	0.910303	fail	fail
Q4J891	0	0	0	0	0	0	0	0	0	0	0	0	0	0	0	0	0	0	0	0	0	0	0	0	0	0	0	0	0	0	0	0	0	0	0	0				Q4J891	0	0	0	0	0	0	#DIV/0!	#DIV/0!	#DIV/0!
Q4J892	3685600	4265100	2254100	2341500	3242300	3481800	3477900	3208300	3318400	3125900	2319800	2256900	3295600	2730500	3627000	3388200	2305800	2475700	2961300	3097800	2583000	2574200	2790300	2756500	3049300	3216500	2712200	2347100	2234100	1836500	2767100	2628800	3003900	3168100	2621600	2554800				Q4J892	3975350	2297800	3362050	3343100	3222150	2288350	0.515101	fail	fail
Q4J893	3322400	3235600	3478300	3694100	2346700	2913300	3063700	2912800	2394300	2671500	2546100	2821900	2412100	2900900	2673200	2559500	2273000	2774700	2902000	3159100	3649500	3849600	3493600	3687000	3341600	3805000	3286400	3170700	2209200	2568900	3572900	3729500	2560800	2988800	4002600	4334200				Q4J893	3279000	3586200	2630000	2988250	2532900	2684000	0.0784176	fail	fail
Q4J894	93155	36838	109010	75406	77354	77125	68714	76324	78302	103220	77862	93282	107200	70983	79061	0	65925	68974	66836	111620	127940	80234	75323	80460	103760	120910	82470	117400	97844	56576	84483	125730	79120	189820	98319	91855				Q4J894	64996.5	92208	77239.5	72519	90761	85572	0.674795	fail	fail
Q4J895	233300	261000	188350	211680	136000	155050	171720	181920	155250	155280	178890	197660	287530	255470	223800	258750	235100	271030	364430	512160	325340	329560	294690	375540	414670	487090	296030	390760	267730	286010	314750	404000	313070	299360	394370	385070				Q4J895	247150	200015	145525	176820	155265	188275	0.265497	fail	fail
Q4J896	0	0	93543	39588	140140	113260	135980	70706	133080	63937	99407	48735	111270	95908	247070	124240	207180	105690	89665	154900	96148	96231	98943	85565	40081	149950	192130	67685	129780	140010	144730	99971	179310	70443	124520	45883				Q4J896	0	66565.5	126700	103343	98508.5	74071	0.359335	fail	fail
Q4J898	0	262240	0	173610	103380	72610	150840	136650	165330	173350	184400	155870	0	247190	402350	372330	147110	103930	40506	224640	218960	64671	0	153010	286800	276800	0	202920	170510	43610	219260	190320	360700	307500	159140	143650				Q4J898	131120	86805	87995	143745	169340	170135	0.193506	fail	fail
Q4J899	1299700	1516800	1358700	1331200	1177100	1240000	1047400	977850	1080200	1038000	1288500	1098600	2210400	1765100	2408300	2242000	1288400	1320800	2638500	2577900	1872900	1787600	1899500	1629200	2145400	2049900	1773000	1170200	1076700	1210500	1601400	1692400	2154900	1593700	1359800	1339400				Q4J899	1408250	1344950	1208550	1012625	1059100	1193550	0.00478713	pass	pass
Q4J8A1	148920	179250	201420	248010	88203	111300	138320	106870	246010	378550	139400	164480	374730	252900	168510	125890	131510	190890	202460	213770	248220	250720	237310	273980	353780	302100	289910	225180	205630	206090	257140	237580	291640	156880	335650	282640				Q4J8A1	164085	224715	99751.5	122595	312280	151940	0.509307	fail	fail
Q4J8A3	1732200	1474200	2304000	2232900	1276800	1290200	1645000	1270800	1314500	1057400	1965300	1992300	3517000	2542500	3172900	2466300	2128300	1602800	3424000	3138800	2352100	1929400	3029700	2528800	3143500	2904200	3008600	2103900	2570400	1718500	2233500	1967400	3482900	3817900	2898400	1911200				Q4J8A3	1603200	2268450	1283500	1457900	1185950	1978800	0.485107	fail	fail
Q4J8A4	283040	293310	346740	352970	328520	364000	266180	329790	243250	247280	374240	395980	264120	296930	346800	332700	230490	355420	302060	409250	316030	372690	333520	353030	384520	482370	377130	327400	299260	296280	273630	361810	410780	447880	307120	344210				Q4J8A4	288175	349855	346260	297985	245265	385110	0.553319	fail	fail
Q4J8A5	425670	397220	441270	425270	361720	384500	377620	351400	302340	238580	457340	449030	517300	401490	420150	595610	381150	385300	605870	599530	454940	434090	520430	452150	650070	582740	520210	447460	449820	478300	600920	589700	666980	629440	485270	485250				Q4J8A5	411445	433270	373110	364510	270460	453185	0.265635	fail	fail
Q4J8A6	3994000	4504100	3186500	3720300	2907400	4824100	2258100	2682700	3322500	2788000	3511900	4474200	3896400	2915000	4478600	4753800	2971900	3766400	3178200	4120700	3315000	3360600	3754700	3552500	2094100	2840900	2829600	2258800	3347600	3969600	3657400	3575400	4488500	5998200	3321100	3444500				Q4J8A6	4249050	3453400	3865750	2470400	3055250	3993050	0.151262	fail	fail
Q4J8A7	134700	178600	92967	114750	88028	87091	78842	65277	111580	107030	121960	99090	137910	127250	162860	183080	89961	105150	170130	177590	116520	101760	100360	107630	227690	192270	176770	141180	109110	104450	140930	133490	201870	182330	162190	138920				Q4J8A7	156650	103858	87559.5	72059.5	109305	110525	0.29712	fail	fail
Q4J8A8	73225	92847	108490	95970	77515	65897	116080	98315	64579	80804	99077	105760	117430	99929	126240	156590	57966	68129	87972	129010	91414	90309	152180	93082	78550	161180	114550	108780	89479	84400	100700	109190	122370	97987	106170	94075				Q4J8A8	83036	102230	71706	107198	72691.5	102418	0.418171	fail	fail
Q4J8A9	0	0	302920	175950	256450	251440	302230	217560	206220	205640	218800	190450	249850	166620	258370	327370	335570	229550	163600	227510	240630	218460	193020	203890	0	184200	410290	0	178330	174860	220350	255450	201490	114310	304540	183550				Q4J8A9	0	239435	253945	259895	205930	204625	0.324641	fail	fail
Q4J8B0	3942600	3957300	3527800	3274600	3003800	2959800	3222700	2999600	2815800	2917100	3122300	3089300	3417200	3412000	2631500	2791800	2353700	2490200	3467100	3704100	3553600	3297900	3780800	3429900	4268900	4460500	3448600	3191600	2859100	2710600	3609900	3949700	3374600	3197900	3545400	3779400				Q4J8B0	3949950	3401200	2981800	3111150	2866450	3105800	0.0532945	fail	fail
Q4J8B1	0	0	0	0	0	0	0	0	0	0	0	0	0	0	0	0	0	0	0	0	0	0	0	0	0	0	0	0	0	0	0	0	0	0	0	0				Q4J8B1	0	0	0	0	0	0	#DIV/0!	#DIV/0!	#DIV/0!
Q4J8B3	907700	922200	914440	828350	986080	905450	1226000	1191800	777990	772250	934890	853110	944120	1003400	1344500	1148600	784650	706150	1017400	1284200	816110	870200	1024000	908340	1441800	1509600	1131800	969670	838990	726460	770180	767040	1469200	1504500	888950	869630				Q4J8B3	914950	871395	945765	1208900	775120	894000	0.580523	fail	fail
Q4J8B4	192220	168580	193720	228230	185680	241650	158540	206680	211650	189420	246700	297280	288030	245830	365180	394310	173760	261210	231430	271440	257750	270890	249800	242240	275920	302520	270470	248290	265750	307470	314940	321370	231360	183810	276760	292990				Q4J8B4	180400	210975	213665	182610	200535	271990	0.47855	fail	fail
Q4J8B5	112740	83992	126520	117710	104820	104060	125050	100680	87900	98217	119470	135670	105800	92598	102750	117200	88407	110490	108060	104940	115630	145850	133570	117980	163310	140450	152540	119360	104180	115930	139790	134470	117640	77520	141300	163330				Q4J8B5	98366	122115	104440	112865	93058.5	127570	0.771154	fail	fail
Q4J8B6	1064700	1146600	764100	790510	585610	496960	650330	594810	604980	564030	572350	528580	667170	585350	945230	981270	506640	450100	1079700	1159400	781300	765500	930020	902070	504380	511240	589090	453800	523400	465500	893770	895430	1103800	1062700	581770	499260				Q4J8B6	1105650	777305	541285	622570	584505	550465	0.0625838	fail	fail
Q4J8B7	638180	740680	740890	566190	599780	494960	622960	589200	645570	584890	652400	561110	726660	594030	837160	971990	648410	584930	726340	850610	752880	659710	786760	702450	1061900	929920	935160	763160	622560	512180	961030	894010	911560	795360	806240	710340				Q4J8B7	689430	653540	547370	606080	615230	606755	0.636786	fail	fail
Q4J8B8	516210	831410	348360	309940	222500	265570	180460	250600	217310	334160	310000	279790	359210	304340	565780	593100	232490	359870	651450	517560	456120	323530	356380	403940	476160	427900	115350	151750	319300	235530	474520	197290	540940	564530	407780	390260				Q4J8B8	673810	329150	244035	215530	275735	294895	0.139771	fail	fail
Q4J8B9	479030	0	143640	289550	0	460900	337480	332420	210540	229030	97186	105880	313650	306570	605380	270100	51452	262870	0	0	330390	0	0	405390	251640	243710	0	196730	228370	128480	477790	0	475080	408380	241530	364470				Q4J8B9	239515	216595	230450	334950	219785	101533	0.919795	fail	fail
Q4J8C0	1501100	1895400	1169300	1359400	1105300	1334200	1183800	1214300	1300900	1424300	1216400	1216100	1331500	1052500	1776600	1842100	1043400	1187600	1211100	1507400	979780	1362900	1126300	1349900	1333700	2007600	1247300	1279300	961530	1147000	1484900	1350900	1214000	1925500	1142400	1419600				Q4J8C0	1698250	1264350	1219750	1199050	1362600	1216250	0.292627	fail	fail
Q4J8C1	0	0	0	54311	48402	30421	22421	58698	17679	0	41680	18791	0	40617	0	0	0	61211	0	65833	0	37936	0	58116	103450	33659	0	63820	0	66130	90868	0	0	0	0	49291				Q4J8C1	0	27155.5	39411.5	40559.5	8839.5	30235.5	0.751838	fail	fail
Q4J8C4	2808300	2876800	2112600	1934300	1861000	1930300	1603500	1431700	2180000	2237400	1993500	2432100	2062800	1806900	2873100	2875600	2424700	2116500	2680700	2528800	2248100	1951300	1961100	1515700	2462900	2248200	1803400	1674200	1728100	1893300	1816500	1818800	2535500	2582700	1775700	1730400				Q4J8C4	2842550	2023450	1895650	1517600	2208700	2212800	0.292894	fail	fail
Q4J8C5	1350900	1397800	1611300	1658700	1453000	1702900	1365700	1495600	1628800	1687200	1607400	1716200	1951100	1169100	1407700	1356100	1325700	1977500	1595600	1124500	1628500	1826500	1695300	1807300	1737600	1640900	1738300	1313200	1696500	1901600	1803300	1496100	1477800	1424400	1817000	1764300				Q4J8C5	1374350	1635000	1577950	1430650	1658000	1661800	0.514936	fail	fail
Q4J8C6	486700	568090	398440	373730	313740	248580	163160	255850	259100	429490	238750	326470	282920	400870	561910	581680	260280	405580	351950	443380	370040	445670	183570	394340	280330	463970	219910	341500	218630	334110	392200	451440	445500	731210	233270	311260				Q4J8C6	527395	386085	281160	209505	344295	282610	0.0742391	fail	fail
Q4J8C7	1034600	1969900	1817400	1381800	1114800	1747200	1543600	1324200	1828000	1576200	1085700	1034600	1798300	1255900	971190	837020	941020	1154200	1181300	1347200	817270	1612600	1172800	1396300	1540700	1468600	1564700	1377400	1064400	1172300	919670	1293700	1435700	1362400	1715300	1338100				Q4J8C7	1502250	1599600	1431000	1433900	1702100	1060150	0.592125	fail	fail
Q4J8C8	1534400	1591800	1229100	1316500	1138200	1106500	1325300	1170800	1269100	1151300	1336200	1301200	1332300	1091500	2004300	2149900	1147100	1257200	1575000	1494500	1325500	1320300	1331000	1316200	1693900	1825600	1450000	1247600	1206800	1219000	1600400	1525900	1891500	1898500	1476100	1437500				Q4J8C8	1563100	1272800	1122350	1248050	1210200	1318700	0.513167	fail	fail
Q4J8C9	483610	346010	401710	398740	273440	337250	355300	254950	337990	279130	410640	379510	418540	417160	422420	686480	240640	352740	453680	519140	379870	398430	451430	331170	524430	614260	516770	394950	334200	377870	391640	452530	614050	521290	348320	454250				Q4J8C9	414810	400225	305345	305125	308560	395075	0.350413	fail	fail
Q4J8D0	1087400	852260	895980	855020	571490	710590	726880	661590	785570	664870	875840	813240	777640	804930	737470	817600	585440	598570	969270	1022100	854200	716330	793800	925390	1123000	1215700	685180	537120	786310	600660	523520	476110	994680	1048300	725060	832740				Q4J8D0	969830	875500	641040	694235	725220	844540	0.372817	fail	fail
Q4J8D1	13240000	12252000	7965400	8116300	8411100	5730700	9071300	8597500	7411100	6716500	8819600	8008200	11229000	10415000	13795000	13388000	7598900	7201500	12677000	11676000	9107000	5488200	9814000	8200800	5241800	5112400	7339000	5921100	6683000	5283500	8966200	7519700	12624000	11365000	5851800	4419800				Q4J8D1	12746000	8040850	7070900	8834400	7063800	8413900	0.357579	fail	fail
Q4J8D2	895440	759530	704020	709150	743420	759520	687030	763410	679530	747040	689120	646110	611320	648190	531210	912920	516870	587300	809700	614270	780690	712450	901820	947320	911070	879130	619390	478340	631460	550320	531710	500640	839280	844440	780080	651290				Q4J8D2	827485	706585	751470	725220	713285	667615	0.106639	fail	fail
Q4J8D3	700220	820010	439590	468430	449980	508650	432610	478380	503770	556930	423090	519300	479590	517550	628040	723890	343280	458760	473970	661950	350860	511660	448880	513030	496330	709940	530750	526820	427190	496100	512140	741470	541100	714000	396670	601430				Q4J8D3	760115	454010	479315	455495	530350	471195	0.27243	fail	fail
Q4J8D4	0	0	0	0	0	0	0	0	25468	0	23954	41858	0	0	0	0	37162	40208	0	0	0	0	0	0	0	0	0	0	0	75105	0	0	0	0	0	0				Q4J8D4	0	0	0	0	12734	32906	0.0628691	fail	fail
Q4J8D5	2246300	2269400	1809200	2127500	1462400	1976800	1323800	1694200	1304400	1789900	1838900	1699600	2687200	2505900	3519100	3893500	1812200	2123900	2523700	3448200	2395800	2359700	1659700	2374800	2789700	3383300	2408900	2345200	2222100	2302600	2938700	3256400	2778800	3545800	2229400	2441800				Q4J8D5	2257850	1968350	1719600	1509000	1547150	1769250	0.039673	fail	pass
Q4J8D6	311120	298930	261090	223700	349010	401160	335070	282160	277510	250700	342990	306700	402020	357210	485880	523240	305910	371160	353730	417170	363280	305930	323730	330350	371670	375690	306970	335370	321460	279860	367010	379150	321080	245920	370290	359310				Q4J8D6	305025	242395	375085	308615	264105	324845	0.783934	fail	fail
Q4J8D7	2516100	1561500	3636600	3542800	5144500	4882800	5622400	4660500	4414100	4393300	4088000	3802300	3678900	2606900	2890900	2085500	6664800	5927700	3591400	2155400	5129300	4142200	4984100	3789800	2856000	1875300	2816500	1667300	3770900	4525300	3381400	2603600	1769900	773310	4504600	3452300				Q4J8D7	2038800	3589700	5013650	5141450	4403700	3945150	0.153091	fail	fail
Q4J8D8	650120	993340	741590	776940	709850	1020900	571780	509730	658330	555880	661830	695150	529960	468410	824270	766610	522630	664420	738950	913080	793870	783970	741030	773240	713060	747750	737280	526010	617350	668920	733770	860230	620730	556270	731250	712480				Q4J8D8	821730	759265	865375	540755	607105	678490	0.0142219	fail	pass
Q4J8D9	0	0	0	0	0	0	0	0	0	0	0	0	0	0	0	0	0	0	0	0	0	0	0	0	0	0	0	0	0	0	0	0	0	0	0	0				Q4J8D9	0	0	0	0	0	0	#DIV/0!	#DIV/0!	#DIV/0!
Q4J8E1	750130	859810	772760	658360	745200	443350	1183100	892310	611600	523730	867960	478510	929590	693850	956570	1042600	586370	447350	1024700	1020700	766180	492520	855320	666840	483340	437300	561270	453650	576690	312330	726440	497230	941330	706270	344690	250130				Q4J8E1	804970	715560	594275	1037705	567665	673235	0.671326	fail	fail
Q4J8E2	837210	1017100	430790	439620	202490	358980	208650	192710	343220	420490	191530	173370	208560	195950	237910	132700	145160	216450	570700	588500	506290	561090	466800	436580	417830	475630	444070	343670	179870	226950	586120	709910	336740	507730	415770	451100				Q4J8E2	927155	435205	280735	200680	381855	182450	0.0533859	fail	fail
Q4J8E3	262780	299180	459580	432580	408010	481100	533420	353950	390580	320740	507730	627300	440810	284370	418580	364050	330560	542630	449600	426760	574010	640330	618890	611500	527650	283460	315020	262250	434400	545910	498120	523320	379760	208310	453710	452500				Q4J8E3	280980	446080	444555	443685	355660	567515	0.309196	fail	fail
Q4J8E4	35888	245650	27862	175590	165890	110890	46211	121100	133720	145820	77502	0	93055	150310	0	188030	96817	113470	48987	142940	64130	123920	16183	103400	70943	252200	43283	0	0	80849	114600	184850	56242	189300	33690	72810				Q4J8E4	140769	101726	138390	83655.5	139770	38751	0.366358	fail	fail
Q4J8E5	343930	267360	427470	371760	313940	388170	445700	355810	309910	322460	488390	473220	504010	411480	625040	538810	431650	423380	571320	495150	519120	459300	428920	448160	525430	582570	389960	269500	434610	417470	316050	305420	456030	424750	434100	470380				Q4J8E5	305645	399615	351055	400755	316185	480805	0.263089	fail	fail
Q4J8E6	0	0	413850	421110	229840	424460	474970	215590	117660	0	0	402390	0	20021	0	514160	557520	286700	74445	0	455710	857720	457520	0	0	414150	0	102170	469500	275230	200060	0	0	0	0	268720				Q4J8E6	0	417480	327150	345280	58830	201195	0.701414	fail	fail
Q4J8E7	7083600	4797200	5065000	4625800	4827900	6826200	5786700	5772400	6358600	7535000	5096600	5599900	3866700	3270900	1464100	1595400	3582300	3868400	3837000	2973600	4202700	4114400	4494000	4052000	3969600	2964500	4427300	2858400	3085400	3579600	4094600	3339600	2497000	2051000	4508100	3717200				Q4J8E7	5940400	4845400	5827050	5779550	6946800	5348250	0.411843	fail	fail
Q4J8E8	9458100	9769000	4589300	4436800	5440300	5286000	5430100	4852200	8513000	8085300	4073200	3696000	4623000	3837500	3907700	4032300	3405800	3253200	4273100	4142000	4444800	4327600	4522900	4335100	4631400	4674400	4884200	3847700	3324100	3124700	4444000	4351900	5651400	5584600	4482800	4201200				Q4J8E8	9613550	4513050	5363150	5141150	8299150	3884600	0.591981	fail	fail
Q4J8E9	4364700	5391900	3678200	3923400	4775800	4817900	4486700	3968500	6776200	6837300	3475100	3417900	3134000	2575300	2029800	890590	3044900	2537000	3025200	2691500	3732200	3648900	3933100	3711800	2988600	2973100	3020600	2163300	3115000	3147200	3359900	3446000	2154300	2521700	3449100	3555700				Q4J8E9	4878300	3800800	4796850	4227600	6806750	3446500	0.640367	fail	fail
Q4J8F0	9034800	8842800	5391900	5681800	5333800	5625400	6860100	6788300	8369900	7701100	5590900	5637200	4610300	3833600	4215700	3711000	3694600	3353000	4436600	4183300	4591900	4561200	4459600	4372200	4700800	4946200	4697000	3793100	3424200	3727000	4037900	3939200	4605400	4448400	4537500	4311200				Q4J8F0	8938800	5536850	5479600	6824200	8035500	5614050	0.84371	fail	fail
Q4J8F1	15971000	17380000	10225000	10607000	10270000	10650000	9793400	10774000	14963000	14957000	9893200	11249000	8553900	7539600	9643700	10246000	6286700	7790500	8006100	9113300	7879200	8790000	7213200	8498400	9769900	10805000	8876000	8371800	7063200	7397400	8185100	9640800	9673700	10645000	8036500	9013000				Q4J8F1	16675500	10416000	10460000	10283700	14960000	10571100	0.733316	fail	fail
Q4J8F2	340740	878870	334480	713090	327620	680110	659990	709350	371600	774310	487530	771680	98676	884920	725310	1034000	514050	1470300	243840	689140	499570	775390	679970	654210	191720	268800	502710	721200	438290	642270	365130	664340	166500	857230	0	404870				Q4J8F2	609805	523785	503865	684670	572955	629605	0.500882	fail	fail
Q4J8F3	1106700	938140	595640	736960	787620	1831300	0	105090	123190	364130	67148	175130	0	234210	324630	253550	85717	147410	757770	661770	623910	726040	1247000	675500	527790	466910	337540	199570	203870	415410	724140	1104100	373170	978280	609600	576860				Q4J8F3	1022420	666300	1309460	52545	243660	121139	0.0010224	pass	pass
Q4J8F4	3319800	3359100	3845500	3804400	2969000	3153700	3469000	2930500	2957300	2952300	3535800	3469500	3964900	3276800	4345500	4167500	2721200	2974500	3961500	4125100	3424500	3163600	3650000	3548300	4909400	5418300	4568000	3597900	3610500	3451900	4546700	4386300	4749200	4353700	4196000	3797100				Q4J8F4	3339450	3824950	3061350	3199750	2954800	3502650	0.33811	fail	fail
Q4J8F5	869070	863870	1261500	1253800	1044300	1173900	1003400	979560	1235600	1029700	1298600	1268300	1233100	973400	1298300	1412700	1020100	1061100	1325700	1493700	1333000	1326700	1261300	1394800	1746500	1716500	1431700	1227200	1389300	1459700	1854400	1864400	1156900	754360	1699800	1509400				Q4J8F5	866470	1257650	1109100	991480	1132650	1283450	0.554963	fail	fail
Q4J8F6	1369600	1459600	1657300	1604500	1071300	1175500	1553700	1321300	1216200	1215600	1568700	1410700	1807500	1439900	1502900	1479100	1191000	1711700	1469600	1607200	1637700	1697400	1509400	1652800	2765700	2981700	2214100	1869000	1816600	1731300	2223200	2113200	1938300	1524400	2324100	2608800				Q4J8F6	1414600	1630900	1123400	1437500	1215900	1489700	0.941684	fail	fail
Q4J8F7	1117600	1214200	1432600	1591900	946300	1143000	1032200	992680	942300	868790	1534600	1606900	1505900	1348100	1684000	1905800	1025300	1152900	1575100	1718200	1260700	1335300	1271100	1241900	1974700	2179900	1751900	1599500	1483400	1466400	1926200	2080800	1849200	2010300	1750700	1756100				Q4J8F7	1165900	1512250	1044650	1012440	905545	1570750	0.640747	fail	fail
Q4J8F8	1478900	1261000	2088200	1990100	1337700	1245400	1440200	1303100	1163200	1150000	2170700	2003600	1976000	1529500	1929800	1769400	1614500	1741400	1998500	1818400	1931200	1764200	1898500	1771100	2597200	2250500	2459300	1549300	2091600	2173100	2515600	2392200	2420900	2022600	2371800	2098700				Q4J8F8	1369950	2039150	1291550	1371650	1156600	2087150	0.906822	fail	fail
Q4J8F9	2667100	3071800	3279200	3526000	2341300	1917800	2227000	2313200	1551100	1842400	3534600	3823400	3774900	3167800	5391500	5657600	2442400	2565000	4381100	4724200	2682100	3175200	3193800	3042400	3787500	4290900	3594100	3388600	3311600	3655100	3639900	4632000	5696300	5819300	2754400	2964000				Q4J8F9	2869450	3402600	2129550	2270100	1696750	3679000	0.588282	fail	fail
Q4J8G0	3217400	3616000	6784200	7302400	4884500	5224500	4838800	4803600	4057400	3857500	7058600	7218500	5271700	3938400	5176100	6860500	5635000	5782400	5253500	5409100	7597800	6715300	4810000	6029700	6733300	6810000	6889300	5508900	7668700	6998400	6960200	7118500	5613600	7746600	7289500	6714600				Q4J8G0	3416700	7043300	5054500	4821200	3957450	7138550	0.884453	fail	fail
Q4J8G1	442860	476840	337250	366030	290440	317840	332300	272080	430450	411240	334150	339090	357060	336240	394130	406400	260080	350040	306720	335890	446160	376210	411250	345520	443530	543680	462030	375930	299060	324940	458940	433690	348920	412620	403550	409980				Q4J8G1	459850	351640	304140	302190	420845	336620	0.635694	fail	fail
Q4J8G2	3918700	4381600	3237200	2659900	3425300	4620300	3696800	3073500	2953000	2729000	2898900	2763800	4594000	3957000	4382500	4482600	3154100	3021000	4501300	4560500	3308700	3174600	4592800	3877700	2832700	2844000	3277300	2646400	2742900	2093200	3110000	2926200	5623400	3768700	2669200	2585300				Q4J8G2	4150150	2948550	4022800	3385150	2841000	2831350	0.0668873	fail	fail
Q4J8G3	128110	259370	155320	144990	136040	147800	88909	83226	149740	164040	100680	131600	73178	95104	181640	271710	79886	105270	132370	190980	130470	171880	117130	125680	119300	167560	147850	134510	83150	124040	185410	184260	117950	272080	83942	161450				Q4J8G3	193740	150155	141920	86067.5	156890	116140	0.110787	fail	fail
Q4J8G4	116610	63235	246830	183220	210830	166400	292450	81765	276430	265310	267300	243710	147740	49460	87056	143070	239210	255520	126450	55365	234530	241660	224780	163190	94191	52437	181420	104860	282040	241690	240850	134940	72468	45017	208430	194530				Q4J8G4	89922.5	215025	188615	187108	270870	255505	0.109706	fail	fail
Q4J8G5	189140	201240	216080	150970	129160	145360	146300	128490	153450	178510	169610	181490	126650	168780	267720	178840	105010	115170	192200	246260	117570	197280	210420	161160	244680	302060	220760	176290	169100	170680	143620	256390	195680	296080	259500	309700				Q4J8G5	195190	183525	137260	137395	165980	175550	0.472223	fail	fail
Q4J8G6	0	0	0	8779.2	0	0	0	0	0	0	0	0	0	0	0	0	0	0	8939.9	0	23795	29313	27213	0	14931	0	8670.8	0	24981	26264	0	0	0	0	33071	0				Q4J8G6	0	4389.6	0	0	0	0	0.340893	fail	fail
Q4J8G7	374160	430600	196700	190020	219740	192440	203530	187750	238430	210030	209100	133760	516740	392890	561170	525090	336360	265770	337460	475490	317010	227790	336130	313170	487340	346870	454760	288910	144960	212770	326440	183600	0	494110	353280	307400				Q4J8G7	402380	193360	206090	195640	224230	171430	0.15688	fail	fail
Q4J8G9	281070	262830	357770	335410	304990	291960	398780	378360	454990	416530	354930	389690	242030	269840	289260	311750	266830	320220	259030	290140	377890	334260	327770	305640	321590	296150	311940	271450	362440	370820	353830	334210	327310	311170	396290	366010				Q4J8G9	271950	346590	298475	388570	435760	372310	0.000927095	pass	pass
Q4J8H4	705030	613840	588930	682210	720470	791980	872570	739370	594840	638060	491950	754470	547990	467290	473440	683040	362390	529180	466100	618810	538210	716730	755060	643500	615630	608340	642970	493310	520710	575740	500290	631600	671750	687080	519890	702040				Q4J8H4	659435	635570	756225	805970	616450	623210	0.976832	fail	fail
Q4J8I0	2846500	2691600	2457900	2066800	1820500	1859100	1810800	1605600	1685400	1588600	2122200	2056900	2111300	1853700	2926400	2593800	1668900	2185900	2478000	2611200	2512300	2499900	2489900	1925300	2755100	2730800	2509700	2358300	1989500	2084300	2660300	2314800	2832300	2851300	2382900	2331900				Q4J8I0	2769050	2262350	1839800	1708200	1637000	2089550	0.0389734	fail	pass
Q4J8I3	762250	907150	229310	89341	126340	225100	0	163150	177090	587700	337690	0	248550	209830	406400	591840	399010	144400	743570	218950	166960	108790	190400	191140	0	612100	118580	302940	135080	248000	283710	190970	1373200	570040	283350	315030				Q4J8I3	834700	159326	175720	81575	382395	168845	0.317833	fail	fail
Q4J8I4	5287200	5901200	5015600	4313800	4422100	4792500	4751200	4181300	4145300	4050300	4790000	4103000	5591700	4666600	5733700	6000700	4236300	4362100	6323300	5613700	5427900	5029300	5700700	5342800	6044900	6341500	5809300	4574500	4146200	3592100	5218800	5541500	5224900	4742400	5513600	4916500				Q4J8I4	5594200	4664700	4607300	4466250	4097800	4446500	0.0497375	fail	pass
Q4J8I5	74994	141190	202410	229710	251190	179500	194110	240410	320300	256030	325390	245660	222700	261070	293060	357380	262400	242160	171760	307410	237480	288530	235510	226030	221410	225880	208650	259050	240220	191480	294320	292950	164270	348520	87191	164580				Q4J8I5	108092	216060	215345	217260	288165	285525	0.0307116	fail	pass
Q4J8I6	199340	249410	234820	192940	367330	235010	281370	205620	251560	255090	261520	119550	248700	215480	272480	187100	202670	179890	207840	239810	252990	207910	288740	205700	293670	265290	206710	191100	197480	196030	289500	228330	0	234640	154900	122130				Q4J8I6	224375	213880	301170	243495	253325	190535	0.634011	fail	fail
Q4J8I7	351890	212450	290760	366420	310560	312960	289930	459790	461810	426800	343320	334760	250540	198240	216000	199870	258330	316150	318790	180630	300100	380100	401260	262920	189430	170650	265410	155300	284670	288850	292680	172990	253540	175330	286140	336310				Q4J8I7	282170	328590	311760	374860	444305	339040	0.0603662	fail	fail
Q4J8I8	1174400	1347300	1244800	1258100	1115400	1037800	1269000	1185400	1325600	1233600	1120400	1222400	1096800	831390	1055300	1485800	1030100	1154700	1243900	865800	1250700	1303600	1232900	1188400	1205500	1223000	1365500	962670	1297600	924530	1309900	1239000	1166700	939720	1393500	1257200				Q4J8I8	1260850	1251450	1076600	1227200	1279600	1171400	0.589947	fail	fail
Q4J8I9	1156100	748730	1359600	1231100	1320900	1286800	1266600	1085600	1512000	1352300	1361900	1342900	1082300	813770	927100	541460	940770	971130	1059100	676530	1485600	1083200	1624500	1082500	861930	593160	1279300	657700	1360700	1079000	1329700	1140600	717140	297000	1219100	1034500				Q4J8I9	952415	1295350	1303850	1176100	1432150	1352400	0.235844	fail	fail
Q4J8J0	500450	344910	274200	258840	364330	265930	269050	315170	393740	315070	296450	236580	325730	252270	284250	339320	196530	204860	305510	286660	301810	263280	311320	243770	337110	282540	257140	204350	240220	207630	260600	243500	354830	407410	270470	215330				Q4J8J0	422680	266520	315130	292110	354405	266515	0.499954	fail	fail
Q4J8J1	588550	588730	329100	292010	203940	156510	284930	252070	344330	352430	223510	204900	444540	320340	588110	463840	224510	221130	477170	498760	421960	335160	346050	326980	569500	637700	477050	445830	331230	259590	373640	381780	690300	566800	527770	403450				Q4J8J1	588640	310555	180225	268500	348380	214205	0.328573	fail	fail
Q4J8J2	574750	629210	844250	620890	1025700	750370	1064800	940110	1102100	883280	941020	1179200	801590	523710	532720	441520	1655200	1314500	814950	501420	1216000	1020200	1200500	962560	663530	411880	736810	378690	958990	1444200	832380	875500	380000	468220	1076400	964290				Q4J8J2	601980	732570	888035	1002455	992690	1060110	0.00796406	pass	pass
Q4J8J3	1373700	1066200	1401900	1447200	1554100	1439600	1449800	1118000	1325000	1255100	1561600	1580100	1077200	1027000	1188500	1494200	1277900	1491000	1440000	1391900	1670400	1574200	1531200	1585100	1614600	1565300	1548500	1289500	1591400	1736200	1558300	1582100	1420900	1397500	1649100	1610000				Q4J8J3	1219950	1424550	1496850	1283900	1290050	1570850	0.991088	fail	fail
Q4J8J4	680830	418700	968480	943770	1026300	1203500	955590	832890	875870	732310	988760	1154100	957310	737860	571100	461090	935410	1180700	904840	848420	1180800	1222400	1199000	1049300	706750	497990	688150	487490	1051800	1145900	1052700	1029800	387340	199930	1062500	979680				Q4J8J4	549765	956125	1114900	894240	804090	1071430	0.707355	fail	fail
Q4J8J5	72581	85205	100170	77381	69142	61847	51528	55876	76054	74665	70117	67353	112160	89689	76765	48764	64368	86709	119940	108780	82712	81940	88469	91505	129890	167190	133830	109220	91318	119910	97594	112970	93139	60819	123100	121920				Q4J8J5	78893	88775.5	65494.5	53702	75359.5	68735	0.117271	fail	fail
Q4J8J6	325400	369130	270490	308190	100570	127010	238830	134900	303390	333780	219900	222360	216740	171460	227450	241150	170160	307690	192210	228290	440950	287980	225680	240900	306430	669330	377070	304460	334050	324210	440100	325690	139230	387700	607690	659820				Q4J8J6	347265	289340	113790	186865	318585	221130	0.884871	fail	fail
Q4J8J7	3483700	3659500	3481900	3259400	2821400	2990100	2863600	2792200	3006200	2817200	3077400	3055100	3304600	3090800	3140100	3747300	2368200	2583700	3145700	3637700	2972800	2860200	2963200	3069000	4492100	4516100	3825100	3250800	3210500	2910200	3307500	3485500	3584300	4352700	3636800	3843500				Q4J8J7	3571600	3370650	2905750	2827900	2911700	3066250	0.0339044	fail	pass
Q4J8J8	152250	236770	205720	247620	225040	248790	258890	240220	236780	251080	174390	169260	227930	177480	201710	149150	155770	208840	187430	261320	219060	243450	262730	250780	337890	290650	252950	258670	157840	193790	271960	251350	186940	90307	311480	300010				Q4J8J8	194510	226670	236915	249555	243930	171825	0.915039	fail	fail
Q4J8J9	1377500	1137700	508630	792700	483270	557220	661230	234990	600820	578450	323970	314060	340910	474090	0	493460	179030	257180	540740	830630	777390	671150	841350	823260	275100	749040	0	287690	243500	179490	200220	274830	244750	627730	719460	665330				Q4J8J9	1257600	650665	520245	448110	589635	319015	0.0604929	fail	fail
Q4J8K1	92685	91828	51537	72736	74060	68404	37201	71840	31571	44792	45885	71807	0	46436	86167	114260	82322	78890	64885	82365	58656	137160	60243	109130	0	0	105990	116760	130430	64990	0	120490	0	0	89844	77780				Q4J8K1	92256.5	62136.5	71232	54520.5	38181.5	58846	0.0262369	fail	pass
Q4J8K3	163920	198420	200570	236840	184550	219200	173410	201120	160750	151760	182630	210480	216030	169330	282200	280800	182460	236330	259020	290380	239340	303970	194160	251230	232400	319200	198670	143800	193490	198100	207580	269000	88703	229060	215290	253640				Q4J8K3	181170	218705	201875	187265	156255	196555	0.172075	fail	fail
Q4J8K4	1504100	1382900	1096700	1066000	1092300	1114100	1123600	1063900	1107300	1039300	1039000	957440	1176300	931270	1261700	1339400	876040	983280	1295100	1372900	1210000	1169000	1228800	1095100	1397200	1383200	1171500	1005600	1061300	1023700	1210700	1302400	1234700	1281900	1183200	1048200				Q4J8K4	1443500	1081350	1103200	1093750	1073300	998220	0.0816779	fail	fail
Q4J8K5	856170	874080	1176900	1170500	678260	888450	1008300	654300	869340	639080	1003700	827960	910620	652210	480730	138970	815830	759930	965840	1063200	1052800	872730	829070	1211100	1299200	1057800	1113000	835990	989510	832580	1105800	949170	699420	466250	1187600	1219800				Q4J8K5	865125	1173700	783355	831300	754210	915830	0.326641	fail	fail
Q4J8K6	44482	31388	160840	147440	158250	122020	177370	125550	205250	146170	147260	182530	0	70923	26265	0	175880	239090	66585	15850	209230	212920	157130	70559	56796	16047	109630	57960	166820	201530	129490	123150	0	0	199850	207600				Q4J8K6	37935	154140	140135	151460	175710	164895	0.0730075	fail	fail
Q4J8K7	391870	484570	394550	397850	309430	261020	233100	298260	355740	277170	275920	301410	492330	417260	546790	571110	373010	351100	600250	556540	497120	408710	522010	459010	738300	692390	563530	502020	345440	353920	577780	560440	513020	599160	558870	542850				Q4J8K7	438220	396200	285225	265680	316455	288665	0.0432955	fail	pass
Q4J8K8	1001000	1179300	960790	830600	937910	913540	819470	699750	919030	760160	801610	779150	757370	700430	1217900	1007500	638100	690650	973410	1178100	928780	961210	790080	836860	998180	1071400	827270	729000	649300	747490	962220	931030	989530	1121000	831580	912630				Q4J8K8	1090150	895695	925725	759610	839595	790380	0.0114214	fail	pass
Q4J8K9	7886300	9052300	5080100	5411000	5242100	5975600	4621000	5337000	5403500	5716400	4470600	5048800	5504300	5828100	7427700	8941400	2921600	5201200	6286900	7369400	4937000	5345600	5508800	5722000	7213000	8631100	5995100	6267300	4279800	4386800	5644000	6654000	8520100	8968800	4716500	6801500				Q4J8K9	8469300	5245550	5608850	4979000	5559950	4759700	0.0836433	fail	fail
Q4J8L0	144510	132910	97315	107970	134070	148980	164530	127110	149790	109410	96998	91518	231900	217640	226230	324370	126430	113630	201320	234740	142460	97802	158990	162380	150420	202370	96145	137900	130760	114560	144880	187630	190050	225550	174600	121710				Q4J8L0	138710	102642	141525	145820	129600	94258	0.769867	fail	fail
Q4J8L1	4731700	3373300	4755500	4793200	7896600	11055000	4561100	6127900	4573700	4255900	4304000	5643700	3819100	2854100	4115500	4435700	4321200	6939700	5315700	5089700	7268500	7776500	7077100	6660500	3073800	2556300	3297000	2284200	4105900	5381200	5327100	5947000	2386200	2412300	5369800	5278300				Q4J8L1	4052500	4774350	9475800	5344500	4414800	4973850	0.34722	fail	fail
Q4J8L2	1798600	1229100	3616300	3593500	3005300	2787700	2864000	2891300	3049000	3020700	2927500	3064400	3038400	2207200	1286900	852790	2902500	2852400	2939300	2355900	3914200	3967100	4493000	4008500	2484300	1600300	3226200	2469000	2808300	2996500	3929300	3719700	1607100	550150	3918900	3552300				Q4J8L2	1513850	3604900	2896500	2877650	3034850	2995950	0.471414	fail	fail
Q4J8L3	3517100	4005900	3942300	3943500	2859600	3950200	2637000	2916900	3225300	3746100	3208100	3679100	2797500	2312900	3557400	3784600	2722300	3792800	3244900	4253300	3634000	3758100	3422000	3620600	3966500	5266200	3088500	3404500	3898900	3686800	4244800	3834700	2990500	4538900	4117500	4854400				Q4J8L3	3761500	3942900	3404900	2776950	3485700	3443600	0.0951335	fail	fail
Q4J8L4	4126700	4594800	3775000	3707600	3627200	4129400	3320700	3327200	3337900	3159800	3629000	3714800	3788900	3864700	4401800	4646100	2813800	3349600	4426600	5078400	3653800	3649900	3512800	3749700	4902100	5128000	4174700	3813400	3281100	3313000	3743900	3869900	4494200	4742700	3619500	3948500				Q4J8L4	4360750	3741300	3878300	3323950	3248850	3671900	0.00713498	pass	pass
Q4J8L6	7672300	8514600	4295800	3874600	3172200	4215900	3241100	3058600	3108800	2062500	3860300	3443900	6722900	7810200	4611700	6487700	1734700	1230300	6005500	6741400	7291500	4464400	4909200	3743400	4923900	3718900	4832100	4176500	2741400	3284700	5067000	4507000	6051900	6837700	3135100	3238400				Q4J8L6	8093450	4085200	3694050	3149850	2585650	3652100	0.0442302	fail	pass
Q4J8L7	2227000	1236800	1246100	1149400	733140	1025800	647300	949700	1101400	896340	1154700	1199700	967930	837660	954420	1415600	1021800	1088800	1260200	1083000	1246900	1587300	1489100	1434000	2051400	1288600	2070200	1220400	1132500	1063400	1943200	1347100	2056500	1809700	1441100	1864800				Q4J8L7	1731900	1197750	879470	798500	998870	1177200	0.240561	fail	fail
Q4J8L8	13093000	12254000	9568400	9442900	9683900	9094400	9155500	7933400	11190000	9145400	9715600	8820000	10497000	8798800	10889000	11591000	7746400	7550700	10531000	9989200	10064000	9623100	9828100	8713700	11638000	10761000	11727000	8960700	8291300	8025800	10603000	10047000	11979000	11473000	11150000	9573400				Q4J8L8	12673500	9505650	9389150	8544450	10167700	9267800	0.176653	fail	fail
Q4J8L9	17677000	16324000	10535000	10753000	8552100	8782600	9358900	9240600	9797400	9704300	9184900	8746900	12399000	11209000	15377000	14607000	8307500	7839900	14771000	14369000	10431000	10451000	12138000	11131000	17043000	15901000	14423000	11548000	8265400	7855100	12438000	12737000	18119000	16872000	12096000	11659000				Q4J8L9	17000500	10644000	8667350	9299750	9750850	8965900	0.116163	fail	fail
Q4J8M0	3000600	3878700	3087700	2791800	2812300	2878700	2803500	3292300	3468800	3454900	3250500	3154100	2693100	1984900	1638300	1821400	2395100	3122800	2584600	2356700	2685900	2539600	3305200	3023100	2175000	2077500	2246200	1519700	2824100	2800000	2905900	2768000	2602100	3159200	2976800	2619800				Q4J8M0	3439650	2939750	2845500	3047900	3461850	3202300	0.424017	fail	fail
Q4J8M1	4186500	4907900	4090000	3784200	3770100	4043700	3783700	3218200	3641900	3615400	3565400	3938800	3391000	3674800	4863900	4943900	2589900	3222300	4018000	4919700	4083600	3984200	3890800	4127100	4898100	5362200	3976000	4066300	3620600	3669200	4681300	5042600	4454600	5251700	4356700	4105200				Q4J8M1	4547200	3937100	3906900	3500950	3628650	3752100	0.0284035	fail	pass
Q4J8M2	5277600	5964000	3187100	3350800	2911300	3061900	2816700	2924100	3762700	3600600	3126400	3213400	4604700	4430300	5551700	6041600	2792600	3128600	4218000	4879400	3299700	3485100	3212400	3517000	5371700	5801400	4705400	4184300	2943900	3075200	4081800	4442500	5885500	6118700	3788400	3743600				Q4J8M2	5620800	3268950	2986600	2870400	3681650	3169900	0.226674	fail	fail
Q4J8M3	2785400	2554000	2218500	2299500	1914500	1918700	2076300	2019100	2035700	1943700	1975000	2055800	2514800	2167600	2980900	3043200	1562200	1835500	2611000	2703400	2095500	2260200	2416100	2334900	3367100	3417100	2742500	2337100	1931100	2072300	2458000	2767500	2915000	2848000	2633400	2860700				Q4J8M3	2669700	2259000	1916600	2047700	1989700	2015400	0.0939505	fail	fail
Q4J8M4	0	84868	54170	31327	0	86784	95584	61401	36845	56525	48128	73417	0	37484	136040	96307	0	37755	96722	75495	55341	0	72050	33536	0	103210	0	57989	65349	61747	90308	88845	0	0	76894	70183				Q4J8M4	42434	42748.5	43392	78492.5	46685	60772.5	0.313524	fail	fail
Q4J8M5	763560	969590	1074800	999840	771780	1122300	569990	577010	779850	884640	682940	766120	777270	644660	819170	955840	887380	1243600	1174700	972320	1095500	1001300	995180	925380	884900	899010	866040	520150	830180	761560	1148600	1090400	642180	734120	851570	866480				Q4J8M5	866575	1037320	947040	573500	832245	724530	0.0131396	fail	pass
Q4J8M8	8113000	9507400	7315200	5633000	5976100	4809900	6156400	4894400	6561200	5213700	5979600	4445200	5672300	4433700	7671700	5676300	4273400	3936300	6175800	6590400	4994400	4918000	6022900	4949600	6125600	5686000	5977900	4762200	4551900	4484300	5179000	3957800	7440900	7383800	4617100	4610300				Q4J8M8	8810200	6474100	5393000	5525400	5887450	5212400	0.117104	fail	fail
Q4J8M9	11144000	12119000	5882200	6481300	7350200	7989900	7048600	6844300	7000300	6995100	6420400	5773600	8139400	7175400	12425000	12750000	4756600	5337300	9491300	9587000	6836100	6534000	7261500	6721800	9058200	9234800	6431200	6586300	5425300	5846400	6910100	7754900	11064000	11670000	7316000	6343700				Q4J8M9	11631500	6181750	7670050	6946450	6997700	6097000	0.118488	fail	fail
Q4J8N2	987790	1200300	478930	590550	495010	458670	463420	465920	182620	234360	531670	477330	597640	570110	108820	825710	307570	383270	782980	667910	551880	477480	0	683580	385010	453530	306520	351360	341730	321560	344260	516650	450700	374050	420630	0				Q4J8N2	1094045	534740	476840	464670	208490	504500	0.0536284	fail	fail
Q4J8N3	0	12994	82132	53743	71301	57096	78840	52851	85669	77949	58959	52815	60940	16909	0	0	46620	33465	48305	44995	92999	74009	80562	31413	29949	23199	25465	33134	66367	57938	60103	70941	0	0	59757	51916				Q4J8N3	6497	67937.5	64198.5	65845.5	81809	55887	0.169455	fail	fail
Q4J8N4	106810	106290	117260	88886	122460	146080	144550	110830	79568	66246	112300	130630	144220	103500	147330	122760	103240	147490	102960	165390	157920	171740	95519	126060	79731	92839	107710	100920	114100	123130	147590	139810	119370	154280	122760	122600				Q4J8N4	106550	103073	134270	127690	72907	121465	0.625737	fail	fail
Q4J8N5	0	0	0	0	0	0	0	0	0	0	0	0	0	0	0	0	0	0	0	0	0	0	0	0	0	0	0	0	0	0	0	0	0	0	0	0				Q4J8N5	0	0	0	0	0	0	#DIV/0!	#DIV/0!	#DIV/0!
Q4J8N6	1015100	783310	1163100	1167400	843400	964930	757340	934430	885970	1015300	1107300	937250	990150	790560	600340	1005200	794050	905490	1198900	1194100	1180900	1148600	940750	1069200	1207500	1128700	1004200	1006400	1056800	1120300	1081300	1202700	552100	713730	1064000	1182300				Q4J8N6	899205	1165250	904165	845885	950635	1022275	0.551354	fail	fail
Q4J8N7	0	70022	38292	32075	36034	14907	20209	15948	25690	17693	27386	28035	0	0	30776	0	41437	32493	0	0	47584	16390	45991	54472	0	57513	35982	25027	59533	25428	28668	41807	0	44242	20902	45864				Q4J8N7	35011	35183.5	25470.5	18078.5	21691.5	27710.5	0.366041	fail	fail
Q4J8N8	0	0	0	0	0	0	294120	122630	275990	275060	0	4007400	0	0	285620	220780	0	0	0	0	0	0	0	0	0	0	0	0	774340	0	0	0	0	0	0	32176				Q4J8N8	0	0	0	208375	275525	2003700	0.222445	fail	fail
Q4J8N9	1208600	1161300	531200	660780	716960	861810	821910	757320	1281000	1143900	680760	740380	596360	638400	365240	770340	577090	611060	611790	900400	678380	842270	728050	915960	885110	900000	921410	778430	602530	616690	690510	738760	0	733040	1036400	983440				Q4J8N9	1184950	595990	789385	789615	1212450	710570	0.760035	fail	fail
Q4J8P1	25682000	27488000	15042000	14409000	18229000	19534000	14164000	13797000	16933000	16513000	15068000	15648000	16278000	15469000	23276000	20135000	12288000	13543000	19180000	20161000	17347000	16574000	16547000	14843000	11726000	13330000	12322000	11045000	12968000	11904000	15652000	16092000	18877000	22205000	11364000	11847000				Q4J8P1	26585000	14725500	18881500	13980500	16723000	15358000	0.0653138	fail	fail
Q4J8P2	2736000	2903400	1945500	2099600	1893300	2212900	1904000	1982300	2088000	2079900	1893000	2050100	2190400	1927700	2515800	2588700	1674000	2027500	2070600	2593700	2268000	2399400	2231100	2259400	2663000	3005900	2338700	2076500	1999500	1936200	2591900	2799500	2622300	2929700	2503300	2553000				Q4J8P2	2819700	2022550	2053100	1943150	2083950	1971550	0.120533	fail	fail
Q4J8P3	5250400	5339700	4529000	4567900	4738700	5279300	5733500	5557200	4796900	4047700	3982800	4233300	5610600	4386200	6200800	5147400	3920200	4202200	5529200	4746800	5906300	4937900	5607100	4294000	5696100	5316400	5724600	4263300	4415300	4328800	4774500	4697900	5453100	4955600	5083100	4642100				Q4J8P3	5295050	4548450	5009000	5645350	4422300	4108050	0.534234	fail	fail
Q4J8P4	1613200	1856400	856680	819230	783270	751720	917000	676070	1072900	1012400	942740	659450	979890	1163900	1529300	1497100	766760	629230	869190	1242900	824950	534240	803800	845490	1389300	1361700	1072600	1026900	757740	592620	1153300	911450	1351800	1690500	806720	849710				Q4J8P4	1734800	837955	767495	796535	1042650	801095	0.296194	fail	fail
Q4J8P5	654480	723400	750140	711290	623960	719300	782610	622790	628210	650730	828680	775060	1084600	840010	922080	872010	723540	754350	1001300	914960	844380	810160	802270	747560	1096500	1013100	1049400	808900	825110	851340	1108400	1066100	916050	1068200	933610	915950				Q4J8P5	688940	730715	671630	702700	639470	801870	0.683483	fail	fail
Q4J8P6	2065000	1980900	1037100	939810	871700	729890	1066700	810090	1098000	1036200	1030300	910010	1412000	1380000	1922700	1617700	800210	723500	1503400	1295900	1032300	939120	980480	877230	1263600	1445600	1340500	1080300	1064200	834370	892710	867260	2076200	2072700	1087200	1006800				Q4J8P6	2022950	988455	800795	938395	1067100	970155	0.282883	fail	fail
Q4J8P7	1498700	1120100	1711300	1654100	2607500	2370200	2632800	2359000	3410100	4219100	2158400	2015500	1941500	1247200	1109900	1082900	2909200	2609100	1953500	838950	2326800	1751500	3021900	1960100	1392100	524890	1813300	774840	1960500	1821500	2920400	1835200	105830	654490	1956300	1437400				Q4J8P7	1309400	1682700	2488850	2495900	3814600	2086950	0.0415387	fail	pass
Q4J8P8	5856400	5014800	6948400	6142300	9432900	8884200	6890600	7196700	8301800	7068300	7111900	6438100	7987600	4785800	4445800	3005500	7639600	7419300	7974400	6182400	11409000	9645900	11777000	8375000	6079500	3125000	6381300	3362700	5540300	7245400	6782400	6794400	5331900	3292500	7652200	7290300				Q4J8P8	5435600	6545350	9158550	7043650	7685050	6775000	0.876355	fail	fail
Q4J8P9	1296700	1297400	1845300	1569100	2164500	1906700	2098700	2680100	2179900	1945900	2151700	2061600	1600100	1005900	960140	1166300	1317800	1825100	1229700	1397500	2427600	1974400	2006900	1794000	1464400	1274100	1626400	1196000	2105100	1816400	1988400	2090800	1020300	945950	2435100	2163000				Q4J8P9	1297050	1707200	2035600	2389400	2062900	2106650	0.0171667	fail	pass
Q4J8Q0	1611100	1841400	1330400	1387400	1573000	1878200	1693600	1509400	1419000	1443200	1357700	1424500	1274900	1218100	1630900	1670400	1125000	1271700	1357400	1627500	1474200	1394000	1552200	1470700	1536700	1887600	1503600	1384100	1302600	1192200	1425600	1510800	1338900	1692900	1500100	1532100				Q4J8Q0	1726250	1358900	1725600	1601500	1431100	1391100	0.242597	fail	fail
Q4J8Q1	5815600	6085700	7175700	6696800	7933900	8720800	7708300	8492300	7713000	7576000	7623100	7584000	6936900	5627400	6911900	6142000	7688800	6862300	6699600	6490700	8177000	8065600	9707900	7995800	6330300	6465200	6950600	5219700	7243900	7532800	9019800	8672200	5788400	6004200	7706700	6895800				Q4J8Q1	5950650	6936250	8327350	8100300	7644500	7603550	0.165601	fail	fail
Q4J8Q2	731200	971340	1077800	1182700	894590	1089200	787080	864780	854330	816060	1048000	1266500	1271900	1199600	1417500	1673100	902560	1212500	1223900	1762100	1272900	1414900	1022400	1374900	1372400	1694200	695960	748430	1033200	1158500	850570	886710	994230	1316000	1027300	1304000				Q4J8Q2	851270	1130250	991895	825930	835195	1157250	0.617174	fail	fail
Q4J8Q3	2520100	3170600	2486200	2502000	2018900	1490900	2243200	2282300	2694200	2714500	2361400	2182000	2705600	2486900	3816400	3810200	2381500	2155000	2692500	3204700	2744500	2389900	2880300	2552700	3064500	2789400	3415500	2314400	2620300	2272300	3483700	3181700	3210000	3831500	3002400	2705000				Q4J8Q3	2845350	2494100	1754900	2262750	2704350	2271700	0.850626	fail	fail
Q4J8Q5	2632300	2370400	2010500	1645700	2938000	3039900	2062100	1591500	1982300	1549800	1553000	1488900	2873400	1727100	1932800	1803400	1520000	1819700	2546300	2136100	2733400	2640000	2755100	1908500	998820	908880	1233100	1010000	1687800	1744700	2110400	1800600	1780700	1354300	1002400	995550				Q4J8Q5	2501350	1828100	2988950	1826800	1766050	1520950	0.0128944	fail	pass
Q4J8Q6	1042300	1025100	1381600	1603000	1191300	1576900	1752300	1372800	1105300	1041800	1585400	1449200	1756700	1254100	1804100	1735400	1242600	1446000	1427500	1512900	1648400	1798800	1959800	1895300	1725100	2116700	1562600	1275600	1449400	1226800	1568700	1572200	1183000	1394300	1892900	1712900				Q4J8Q6	1033700	1492300	1384100	1562550	1073550	1517300	0.608126	fail	fail
Q4J8Q7	169070	148850	74573	85201	53203	38808	43429	45787	56296	150620	77273	44092	78901	185700	122560	172510	38260	41935	107520	100620	91163	24672	22185	82173	96186	173690	105920	139730	61594	25996	92255	138470	169670	244730	100470	75809				Q4J8Q7	158960	79887	46005.5	44608	103458	60682.5	0.376169	fail	fail
Q4J8Q8	1163200	1222200	1050400	1049200	1041100	1166800	919320	801840	988660	900540	1037200	1013300	1359600	1148700	1346100	1446900	1122400	1157300	1486600	1513200	1358300	1338600	1440300	1335500	1516100	1448900	1349000	1015700	1246000	1098500	1552300	1594100	1413500	1280100	1505100	1390800				Q4J8Q8	1192700	1049800	1103950	860580	944600	1025250	0.00488247	pass	pass
Q4J8R0	175370	339290	200380	201220	194410	165070	188350	185950	202410	236290	263440	241650	234850	202100	316780	355520	131310	171670	278440	241390	200740	219780	232550	223880	267410	361930	226650	224070	263000	188870	243140	261700	306930	319660	222400	259060				Q4J8R0	257330	200800	179740	187150	219350	252545	0.813224	fail	fail
Q4J8R1	96218	91130	119200	118730	99215	124800	92426	86182	102720	90629	111220	104950	122810	95452	137230	124740	100430	119640	119310	142490	151280	150290	134800	136680	146450	149200	137720	124350	121130	127490	174720	149140	124060	144630	156820	145520				Q4J8R1	93674	118965	112008	89304	96674.5	108085	0.179106	fail	fail
Q4J8R2	395770	599790	378810	382100	365670	276110	461720	357820	376670	380680	414400	343750	545730	431900	821120	874600	455480	391840	560240	719860	484140	376340	442620	431860	581520	694970	431620	480060	377910	384140	541600	625010	831610	794380	505660	505370				Q4J8R2	497780	380455	320890	409770	378675	379075	0.827326	fail	fail
Q4J8R4	1847500	1856100	2047200	1672500	1876600	1765100	2004300	1536800	1637500	1381900	1876100	1748100	1835500	1601000	2352700	2099500	1542400	1511300	2236100	1763600	1496700	1879100	2084100	1486500	2536100	2330900	2193700	1658600	1658700	1586200	2136300	1835600	2435000	2303200	1982400	1943500				Q4J8R4	1851800	1859850	1820850	1770550	1509700	1812100	0.195626	fail	fail
Q4J8R5	1185000	1626300	1402300	1164700	1008200	981750	1517700	1132200	1201500	1025900	1238900	1140700	1147800	1140500	1174000	833550	1066200	1034400	1383100	1402500	1205800	1065700	1372400	1209600	1313300	1307100	1399300	1147600	1011000	952360	1140900	1079100	1352100	1271800	1190100	1086100				Q4J8R5	1405650	1283500	994975	1324950	1113700	1189800	0.88181	fail	fail
Q4J8R6	64549	48902	135220	148280	105710	132850	98307	98315	119320	119330	131300	142500	123610	95591	87476	85025	112640	150310	110520	122660	158250	138630	128080	108260	140840	121870	111940	92261	138430	169260	183710	174170	117660	91901	184990	138560				Q4J8R6	56725.5	141750	119280	98311	119325	136900	0.514967	fail	fail
Q4J8R7	1204800	1416300	2106200	1786500	3599300	3219000	3556500	3857300	3414200	3691900	2598600	2942700	1542100	814580	867080	733690	4740000	3447900	1273400	530880	2696500	2002800	2420500	1664700	816270	385000	621240	261190	2353000	2854500	1205100	968310	834650	372470	1561900	1261700				Q4J8R7	1310550	1946350	3409150	3706900	3553050	2770650	0.0302456	fail	pass
Q4J8R8	25327	40914	204330	204120	198640	210860	204280	194450	177440	179620	251340	286100	247650	97577	170580	190880	223940	257380	138950	173260	293380	267140	210080	205640	137830	136640	188320	155580	277030	238310	259110	292640	78956	150700	255720	238350				Q4J8R8	33120.5	204225	204750	199365	178530	268720	0.122276	fail	fail
Q4J8S0	38776	24975	85981	68937	105190	125830	115330	116790	49486	51063	82549	83839	72140	72905	73757	105160	81407	82231	95109	90249	106690	99331	115650	86543	32205	86518	51950	74344	69317	68518	101500	87789	44088	85801	71459	76595				Q4J8S0	31875.5	77459	115510	116060	50274.5	83194	0.686971	fail	fail
Q4J8S2	2243500	2391700	1967700	1738300	1784100	1765000	902250	857580	1168100	1112700	895040	781670	1199700	1137100	1195200	1250700	949970	919870	1941500	2072000	2178500	1776300	2139600	1851900	1594000	1679200	1386000	1234400	1115300	916210	1680000	1837600	2252200	2191000	1547300	1378400				Q4J8S2	2317600	1853000	1774550	879915	1140400	838355	1.19931e-05	pass	pass
Q4J8S3	315030	269470	493370	320600	218160	225830	252350	255200	194150	203820	339510	255650	417890	290370	439440	435000	226770	158170	481280	377260	375270	339540	432060	314070	386010	430210	355490	301250	291910	280500	335330	362500	494720	362180	325690	365540				Q4J8S3	292250	406985	221995	253775	198985	297580	0.246361	fail	fail
Q4J8S4	758590	570510	968420	887750	375100	371810	398960	319190	357040	386860	502160	422760	624930	482310	615720	586160	451700	417370	905770	822970	897710	807750	1051200	808640	941800	755360	816830	583170	489410	456210	735940	660470	526930	377060	885830	709200				Q4J8S4	664550	928085	373455	359075	371950	462460	0.0379484	fail	pass
Q4J8S5	628210	521700	552670	548380	312770	340470	333860	297520	358140	358590	398640	364330	497900	424720	507360	466790	367470	352550	597550	636140	508820	478570	591860	537430	612170	569550	605530	440010	386690	366710	554450	496820	458980	478310	499880	429560				Q4J8S5	574955	550525	326620	315690	358365	381485	0.033744	fail	pass
Q4J8S6	56130	55122	88659	81243	70699	54217	65056	67828	69429	57882	102180	93634	86025	86036	92756	101060	85152	104760	86544	130170	88015	115820	70805	72627	115040	140420	127920	125760	120240	110330	134110	143950	96299	82139	118520	124880				Q4J8S6	55626	84951	62458	66442	63655.5	97907	0.397488	fail	fail
Q4J8S7	3295100	3634900	2904500	3109100	2155700	2669900	2693500	2266800	2690300	2554600	2753400	2941800	3329100	3152900	4092400	4107300	2331800	2138500	3753300	3954700	3030000	3051400	3038600	2984900	4416400	4713900	3617600	3095100	2564100	2380400	3442600	3895500	3550800	3784900	3195400	3500900				Q4J8S7	3465000	3006800	2412800	2480150	2622450	2847600	0.204484	fail	fail
Q4J8S8	1610600	1729000	1497600	1536600	1629800	1866100	1482200	1483600	1646000	1425200	1457700	1622000	1684300	1604000	1799800	2282000	1071400	1471700	1485600	1918200	1698700	1701900	1725900	1665900	1724400	1878300	1606800	1317800	1511700	1482100	1788100	1738900	1834300	1792500	1445400	1591100				Q4J8S8	1669800	1517100	1747950	1482900	1535600	1539850	0.0885345	fail	fail
Q4J8T0	207700	121230	0	168790	234370	200430	231750	243660	264340	226260	251650	207700	229410	155520	93629	317630	326430	178120	141020	259640	317140	229690	257920	217610	159310	180620	295920	190250	135380	262490	157180	180090	189340	0	216440	190930				Q4J8T0	164465	84395	217400	237705	245300	229675	0.0447951	fail	pass
Q4J8T1	1897300	1825000	1308400	1578900	1071100	836200	1443400	1800800	1609700	1406100	980280	895850	1823600	1353100	1571100	1525200	1016700	851050	1768600	1710600	1451500	836690	1770800	1664900	1102200	1235800	1622600	1070400	1141800	822510	1453700	1176800	1747400	1389500	1235200	1113400				Q4J8T1	1861150	1443650	953650	1622100	1507900	938065	0.783559	fail	fail
Q4J8T2	75416	55582	130530	140930	106700	123890	137880	127010	110720	95821	170400	163100	126060	113650	71999	103340	84167	116140	135960	141330	160200	119100	141480	128970	178110	196520	153900	140640	128650	141390	159140	128510	140350	165950	141650	133230				Q4J8T2	65499	135730	115295	132445	103270	166750	0.145028	fail	fail
Q4J8T3	899760	840920	864250	658120	1947100	765420	777870	651930	442660	551560	448600	347300	563000	450400	904510	0	557740	392560	1133700	932170	1044300	588080	771120	524470	123410	414010	504150	400660	540130	885970	519810	0	963870	978280	467110	90010				Q4J8T3	870340	761185	1356260	714900	497110	397950	0.0479408	fail	pass
Q4J8T4	429180	449410	564160	554090	549880	624110	646890	563320	608980	526530	589180	611320	601320	486300	533120	379860	458880	511090	580240	538030	527960	623350	660660	611240	652120	577240	620330	453680	531520	507350	584360	583850	485620	409590	687480	700860				Q4J8T4	439295	559125	586995	605105	567755	600250	0.10282	fail	fail
Q4J8T5	235420	436830	240680	302610	216460	231710	223040	270190	265860	263030	287430	303830	279140	329050	605880	348190	146610	188470	140720	351090	335760	299150	352000	251120	167250	229530	218130	226030	220700	201300	301750	478910	111240	464400	145600	170940				Q4J8T5	336125	271645	224085	246615	264445	295630	0.819994	fail	fail
Q4J8T6	206970	287420	391600	300330	196530	258170	389020	254880	151930	184400	0	327640	112170	86927	304500	0	48795	242780	225070	181220	257500	302750	307990	362040	330810	237860	388350	263270	0	164340	204780	328910	153550	186820	507630	318590				Q4J8T6	247195	345965	227350	321950	168165	163820	0.402644	fail	fail
Q4J8T7	1797200	1999100	2147900	1838300	1707800	1559000	2311400	1602400	2328400	1901000	2029600	2019000	2060300	1873100	1881300	1306100	2132100	1976500	2115600	2061100	2287200	2183800	2366100	2015200	1477800	1712800	1361700	1139300	1871900	1945700	1401900	1433000	1446700	1491700	2035800	1785000				Q4J8T7	1898150	1993100	1633400	1956900	2114700	2024300	0.20302	fail	fail
Q4J8T8	2198000	2968200	2080500	1904600	1791800	1261800	2041400	1969600	1876800	1943500	1668900	1074800	2153300	1961300	1961200	1885100	1353300	1224700	2319300	2099100	1749400	1432200	2442800	2269500	2851200	2720000	2571900	1989800	1533300	938850	2166800	1849500	2981700	2916800	2356800	1889100				Q4J8T8	2583100	1992550	1526800	2005500	1910150	1371850	0.34171	fail	fail
Q4J8T9	3183400	3322600	3010700	2876800	2416100	2396800	2681900	2603700	2672900	2234200	2655800	2465300	3256700	3047700	3967800	4134100	2050000	2418000	3579300	3941000	2392900	2632800	3124700	2946600	3826600	3763800	3576500	3069800	2300600	2284200	3084400	2982800	4021400	3904200	2956600	2969400				Q4J8T9	3253000	2943750	2406450	2642800	2453550	2560550	0.0996123	fail	fail
Q4J8U0	7506300	7455000	3551100	3517600	2996700	3264000	2983100	2383400	2050000	1989700	3202900	3404900	4468100	3273500	5645700	5911300	2888500	2426000	5762100	5183900	3537000	2863200	3776600	3582200	2252100	2082900	2930400	2569700	2535800	2522100	2570600	2927600	6142000	6109000	2432300	2210300				Q4J8U0	7480650	3534350	3130350	2683250	2019850	3303900	0.0488753	fail	pass
Q4J8U1	11563000	8438400	9535700	9374200	9284100	9666300	11776000	10618000	7391700	7800900	7777500	7460800	8506400	5568800	5247800	4833400	6759600	7317200	10456000	8562700	10504000	9618700	12329000	10068000	6248200	5200400	7158500	4687600	6798100	6605500	8895900	7975800	6262800	5294400	9330900	8021800				Q4J8U1	10000700	9454950	9475200	11197000	7596300	7619150	0.363598	fail	fail
Q4J8V5	39099	95607	0	0	0	29365	31628	0	10627	32984	10967	0	0	27729	0	6024.5	16360	0	0	39150	0	0	0	0	0	0	44848	0	0	0	54760	0	0	0	33733	0				Q4J8V5	67353	0	14682.5	15814	21805.5	5483.5	0.448738	fail	fail
Q4J8V6	105500	0	99234	135000	61338	53782	55210	64794	51492	53965	105400	81899	140190	106760	0	159110	122360	70571	140150	110360	97201	59397	98624	64923	0	64150	98807	38269	88681	61891	109850	88448	0	0	86602	59765				Q4J8V6	52750	117117	57560	60002	52728.5	93649.5	0.748635	fail	fail
Q4J8V7	1052100	1069400	1088100	1146500	1169800	1319600	1345800	1189300	892640	853720	1262900	1346200	1715800	1465800	1631900	1830900	1110100	1242900	1620400	1796100	1395300	1403100	1504600	1367500	1491700	1527000	1458300	1288200	1263200	1328200	1416000	1503000	1396800	1403200	1256300	1119000				Q4J8V7	1060750	1117300	1244700	1267550	873180	1304550	0.940996	fail	fail
Q4J8V8	341730	366680	175890	173150	172190	97122	192190	148510	157140	174610	191310	115500	132120	249000	355020	300790	93308	75598	0	268920	194010	136510	221090	130960	262870	277870	181480	222140	145310	149750	194760	150260	301250	333430	192150	183240				Q4J8V8	354205	174520	134656	170350	165875	153405	0.231961	fail	fail
Q4J8W0	153700	167980	293990	292990	305480	356630	316780	233960	239110	216150	373660	305730	315570	221930	339580	514960	310400	302260	312210	296320	377430	297990	336530	291400	343930	342810	263890	219590	337720	293670	345570	307570	220200	287590	343250	316090				Q4J8W0	160840	293490	331055	275370	227630	339695	0.656302	fail	fail
Q4J8W2	0	0	0	0	0	0	0	0	0	0	0	0	0	0	0	0	0	0	0	0	0	0	0	0	0	0	0	0	0	0	0	0	0	0	0	0				Q4J8W2	0	0	0	0	0	0	#DIV/0!	#DIV/0!	#DIV/0!
Q4J8W3	0	0	0	0	0	0	2321900	0	983410	0	1286600	0	0	0	0	0	0	0	0	0	0	0	0	0	0	0	0	0	0	0	0	0	0	0	1079300	0				Q4J8W3	0	0	0	1160950	491705	643300	0.0763562	fail	fail
Q4J8W6	7800100	7669300	4836800	5235500	4153900	3976900	4343600	3894500	5501500	5312700	3759000	3457600	5058300	4297000	5746800	7179200	3451400	4034600	5085200	6044400	3905300	3902700	6133300	5573000	4501500	4637200	4119400	3569400	3033300	2995400	5661400	6222300	5544900	5459900	3297000	3550500				Q4J8W6	7734700	5036150	4065400	4119050	5407100	3608300	0.143867	fail	fail
Q4J8W7	193240	318700	219920	216310	208060	227280	209050	182430	292140	112400	200040	229170	154820	145510	246400	245290	216770	265740	196640	242550	175210	250320	236500	248420	172230	169110	178630	165280	230810	284260	285340	288270	278130	250160	147600	232290				Q4J8W7	255970	218115	217670	195740	202270	214605	0.402314	fail	fail
Q4J8W8	329590	435820	339170	359630	305550	338990	315090	300840	363250	337130	350800	369880	381770	410910	374370	373860	280440	262870	309420	469720	281870	377340	363690	388330	364040	455700	238550	241000	287970	291630	211390	218090	383060	361030	316150	348620				Q4J8W8	382705	349400	322270	307965	350190	360340	0.589179	fail	fail
Q4J8W9	968720	922690	622920	568180	480740	424860	711250	539160	387550	349660	589160	406520	599020	550060	831800	781470	468610	332140	963990	896270	589980	532790	706020	648190	530670	580480	654690	513140	497820	469170	750190	772460	1141600	1005400	537400	598770				Q4J8W9	945705	595550	452800	625205	368605	497840	0.157035	fail	fail
Q4J8X0	176760	215610	215900	265290	142260	296140	260730	254860	320220	310890	357120	329830	264020	157380	253450	444750	288600	302780	201700	141450	353610	331690	271820	209290	260190	391610	383970	296200	349760	446090	363660	398060	174620	296620	441970	497190				Q4J8X0	196185	240595	219200	257795	315555	343475	0.0115769	fail	pass
Q4J8X1	2059500	2386200	1784200	1797300	1415500	1558200	1600500	1453900	1817400	1724100	1840900	1828800	2001600	1862400	2612100	2657700	1480500	1598900	1886400	2219800	1800200	1906200	1896900	1852400	2462600	2674800	2259700	1876600	1841400	1734400	2290800	2327300	2341500	2486500	2135700	2185500				Q4J8X1	2222850	1790750	1486850	1527200	1770750	1834850	0.450713	fail	fail
Q4J8X2	3662700	3322000	3109300	3085000	3071500	3195500	3428700	3188400	3164700	3115200	2778300	2724800	3302300	2908000	2928700	2858000	2215700	2462000	3075200	3638500	2902300	2784300	2989000	3207200	3265200	3238600	3180100	2673100	2522000	2573500	2964200	3327000	2912000	2832000	2662300	3128900				Q4J8X2	3492350	3097150	3133500	3308550	3139950	2751550	0.251282	fail	fail
Q4J8X3	1226500	1313400	1959300	1546700	1114400	1501600	1681400	1880100	1517800	1575800	1437700	1663600	1869000	1953300	2112700	2815800	1444500	1470700	1726600	2266900	1673500	1766400	1823600	1964100	1616800	2179400	1664500	1572100	1468800	1116700	1711500	1401800	1608000	1968800	1782500	1722300				Q4J8X3	1269950	1753000	1308000	1780750	1546800	1550650	0.215584	fail	fail
Q4J8X4	311010	333180	283510	371070	283960	320420	289910	256470	336510	317220	330910	323290	406560	333170	471620	507910	336530	339090	421380	442470	392330	442210	382730	357560	411940	361760	344980	334700	361380	395450	423480	459520	397760	343130	388580	358550				Q4J8X4	322095	327290	302190	273190	326865	327100	0.66642	fail	fail
Q4J8X5	627770	694890	563400	581370	510180	571700	536960	550220	547430	555590	517590	594880	592840	486180	642250	740030	501970	596990	614400	601240	608280	618400	687260	614330	822510	888550	770210	606080	548010	575070	700950	708370	475150	752350	705610	664150				Q4J8X5	661330	572385	540940	543590	551510	556235	0.169929	fail	fail
Q4J8X6	258550	314770	219890	201800	225600	257120	192160	190750	285130	256380	285060	318540	292000	247950	480560	466450	263570	281860	309950	314650	238440	245490	151610	181840	294060	344860	326860	272930	306090	304620	337780	372330	397900	378990	274050	302470				Q4J8X6	286660	210845	241360	191455	270755	301800	0.763224	fail	fail
Q4J8X7	295310	476890	639940	691420	651950	758030	419390	675480	639370	684700	788680	841650	564430	568840	624350	568280	428170	885900	436270	701600	869850	848470	589620	806550	609800	795460	605840	678080	874150	787840	706230	917510	551570	775780	535430	839350				Q4J8X7	386100	665680	704990	547435	662035	815165	0.352713	fail	fail
Q4J8X8	328450	237420	548870	589910	590510	506090	820370	693580	687510	502020	528520	741940	253750	169670	91462	85642	1412600	1038900	267720	116570	847900	721990	674090	491400	219000	192430	224240	74778	789260	736010	484840	326030	118410	193160	593290	503140				Q4J8X8	282935	569390	548300	756975	594765	635230	0.0328009	fail	pass
Q4J8Y0	3269400	3787000	2811500	2770400	2691900	3074600	2481800	2235800	2724700	2574700	2765200	2757800	3477800	3048800	4773000	4548900	2669100	2938800	3783200	4262500	3189800	3024200	3470900	3260500	4886400	5184900	4234300	3466600	2851900	2733100	3783500	3929400	4178300	4623500	3866400	3838300				Q4J8Y0	3528200	2790950	2883250	2358800	2649700	2761500	0.0298278	fail	pass
Q4J8Y1	0	43095	48703	37945	0	62931	0	27499	16743	0	30484	81608	0	37953	0	53231	0	43818	0	14257	0	53097	64550	43532	61579	0	57031	0	23973	0	0	88152	62330	0	0	54986				Q4J8Y1	21547.5	43324	31465.5	13749.5	8371.5	56046	0.718359	fail	fail
Q4J8Y2	2321300	1768300	1502100	1523400	1636200	1693800	1885800	1955600	1806000	1841400	1416400	1321100	1709100	1358900	1239400	1451800	1684600	1543200	1800500	1402200	1795300	1761300	2006200	1770000	2193700	1622800	1966100	1390100	1599100	1542000	2439200	2243600	2091600	1384100	1991200	2053000				Q4J8Y2	2044800	1512750	1665000	1920700	1823700	1368750	0.828845	fail	fail
Q4J8Y3	3681600	3960200	4416800	4494800	3848600	3961100	4363000	4177900	3422000	3245000	3865900	3889500	4432600	3698400	5081400	5133000	3166600	3542900	5101600	5197300	4504600	4475700	4721600	4504600	5570800	5648400	4675900	4180300	3851700	3703600	4445100	4506200	5224600	5459400	4855800	4644500				Q4J8Y3	3820900	4455800	3904850	4270450	3333500	3877700	0.312383	fail	fail
Q4J8Y4	4680300	3195400	1804200	1513900	1185000	1337800	1469300	1399100	2302600	2567200	1181700	1246400	2091300	1887700	1225300	2007300	1366500	1268000	1602200	1765500	2259200	2424500	2674800	2112400	2280000	2183500	1977100	1638400	1867900	2076200	1693800	1728500	2321100	2332600	2032500	1767300				Q4J8Y4	3937850	1659050	1261400	1434200	2434900	1214050	0.356335	fail	fail
Q4J8Y5	530400	636520	447570	487530	496080	564380	421490	418910	551200	504480	613830	741520	514160	393390	605120	607110	344050	428720	466500	474380	387240	407470	393620	393980	292730	366290	280880	364160	431840	487280	418860	448790	499080	534970	335590	354940				Q4J8Y5	583460	467550	530230	420200	527840	677675	0.800958	fail	fail
Q4J8Y6	374000	583720	484160	496830	399660	562310	548920	408210	466450	411900	517560	621370	428450	492970	769580	753890	299190	460780	401170	441390	489820	543480	710710	492870	674070	816100	518880	519850	462320	508250	420090	480250	420030	374480	549660	585700				Q4J8Y6	478860	490495	480985	478565	439175	569465	0.804467	fail	fail
Q4J8Y7	1907200	1720200	1490400	1490500	1403900	1629100	1798300	1571000	1763400	1606700	1546900	1612500	2065800	1655100	1914500	2064200	1333300	1566200	1648300	1753700	1662800	1690600	1773800	1721300	1961500	1834800	1805000	1452000	1438000	1570500	1787300	2011800	1858700	1797100	2052900	1819800				Q4J8Y7	1813700	1490450	1516500	1684650	1685050	1579700	0.63229	fail	fail
Q4J8Y8	2947300	3207700	2149100	2030600	1795200	1781400	1893800	1828800	2090100	2157700	2095500	1647900	2286500	2087200	2500000	2382400	1477700	1696800	2088800	2514000	2034100	1825000	2000500	1745800	3120900	3020500	2665000	2378900	1908900	1769000	2380800	2384400	3042500	3310400	2383400	2336800				Q4J8Y8	3077500	2089850	1788300	1861300	2123900	1871700	0.191749	fail	fail
Q4J8Y9	39355	0	86069	85663	0	37806	29306	56205	39365	0	40683	44047	60744	30564	50257	0	25472	30769	61826	61909	28196	51008	0	60074	0	0	80296	0	45031	0	57276	46923	84832	40690	33862	35861				Q4J8Y9	19677.5	85866	18903	42755.5	19682.5	42365	0.716859	fail	fail
Q4J8Z0	5252100	5627300	5258500	5390600	3784300	4043700	4804000	3655700	4356700	4142500	4444400	4639300	6397600	5099700	6437100	6186400	3734100	3876600	6735800	7258200	5008700	4936800	5618100	5725500	6433600	6653700	5376800	4667500	3857500	3683600	4875700	4759300	5370300	5438000	4909700	5387100				Q4J8Z0	5439700	5324550	3914000	4229850	4249600	4541850	0.152863	fail	fail
Q4J8Z1	106640	145160	120260	149450	157710	194930	161910	183610	151880	145250	152720	174730	96097	75990	92600	115460	154960	140030	59104	175630	192900	157090	145990	131840	122310	226470	218250	141710	155080	143590	178730	202210	181320	71503	204160	209100				Q4J8Z1	125900	134855	176320	172760	148565	163725	0.2789	fail	fail
Q4J8Z2	609730	718070	924040	870070	953650	1054700	1015600	874970	618430	604280	1072000	1090800	971070	897650	1131500	1137400	838570	1204400	1122600	1231100	1126500	1154300	1112800	1108600	1103500	1139600	1043000	829120	1052200	975620	1076200	1181800	955210	754380	1133100	1091600				Q4J8Z2	663900	897055	1004175	945285	611355	1081400	0.832869	fail	fail
Q4J8Z3	472860	613970	730390	605250	503190	502210	300620	522320	362090	462660	586190	653340	464960	453710	511040	826190	269650	482150	556680	758670	582310	579320	597670	626920	878390	1161200	710210	708470	581170	506370	763250	958070	707570	805700	797510	854000				Q4J8Z3	543415	667820	502700	411470	412375	619765	0.211775	fail	fail
Q4J8Z4	2037000	1698500	2199700	3005300	3133400	5900000	3033400	3783100	1424900	2387000	1849000	2558000	2135800	1914900	1997800	2233300	2105900	2900900	2272100	2066800	3003600	3563900	3245300	3587600	1246000	1172600	1314800	1277300	1654900	2366000	2529700	3009900	1244000	2438000	823700	1507900				Q4J8Z4	1867750	2602500	4516700	3408250	1905950	2203500	0.50729	fail	fail
Q4J8Z6	243290	296930	263160	268400	287190	300670	268310	207460	235470	211220	268730	275270	346140	289340	392480	410400	257870	309050	402050	415470	327030	279630	317820	300990	402680	454160	350950	303430	300240	284100	379840	352050	254470	418940	332950	354850				Q4J8Z6	270110	265780	293930	237885	223345	272000	0.0631998	fail	fail
Q4J8Z7	310700	428460	327990	323580	192640	285610	374210	292250	221520	239450	200240	165010	173200	219100	304220	429860	203340	167610	176960	317750	186520	280140	369300	259580	320610	452270	277630	238070	233450	182190	361040	227070	290380	456500	235880	290310				Q4J8Z7	369580	325785	239125	333230	230485	182625	0.179785	fail	fail
Q4J8Z8	273650	475290	171260	194180	172380	249410	84652	150200	127790	179340	117760	143270	167930	164070	356610	309480	136430	199340	237370	447500	178770	190990	91398	241390	197640	293470	200720	220080	77301	146730	179390	245460	335130	444740	145710	198710				Q4J8Z8	374470	182720	210895	117426	153565	130515	0.0313623	fail	pass
Q4J8Z9	129160	104280	66737	92825	73497	91253	76764	68463	89888	147860	68960	72902	94373	69342	121180	118060	77270	83986	131640	119320	88743	86657	101720	98521	52464	132430	129370	89175	65680	54000	142340	151910	139770	105700	114250	127130				Q4J8Z9	116720	79781	82375	72613.5	118874	70931	0.730458	fail	fail
Q4J900	575070	619290	260070	307980	428070	460420	437970	288460	381660	354230	345310	304090	501500	416370	638640	671810	310990	382270	448880	479250	404160	394320	479400	446950	340100	393110	323750	290050	292540	273020	284100	353950	418090	418030	257750	231980				Q4J900	597180	284025	444245	363215	367945	324700	0.177961	fail	fail
Q4J902	0	110120	94559	57014	41280	41336	100020	58410	82477	63586	109520	19769	203200	143750	207260	184720	53706	92709	67297	78155	152050	77533	61182	79647	185470	118860	120000	112130	88799	78194	114670	125150	167460	217650	111810	39729				Q4J902	55060	75786.5	41308	79215	73031.5	64644.5	0.494323	fail	fail
Q4J903	0	0	79387	84649	36538	94596	47420	0	151280	0	85633	100750	271640	0	0	0	238540	285250	94295	0	227750	197670	227720	199640	0	0	0	0	259880	261650	97849	0	0	0	67763	11597				Q4J903	0	82018	65567	23710	75640	93191.5	0.629057	fail	fail
Q4J904	1367900	1190600	1321500	1341100	1072700	1081800	1100100	1062600	1153100	1030700	1389200	1281500	1264900	1229800	1225300	1434400	1079300	1144200	1261600	1363600	1490500	1366500	1508300	1362700	1671100	1867800	1453700	1157400	1309200	1149500	1299900	1302700	1471200	1473100	1514700	1342900				Q4J904	1279250	1331300	1077250	1081350	1091900	1335350	0.463921	fail	fail
Q4J905	3730700	3750300	4045900	4412400	3732000	4082800	4311600	4150000	2947400	3025100	3713400	4102400	4468700	4138300	4990100	4286500	3122400	3728200	4660400	5194200	3413400	4333400	4064900	4230400	5037300	5350800	4012600	4026900	2841400	3284700	3817900	5111900	4697300	4895100	3834800	4368900				Q4J905	3740500	4229150	3907400	4230800	2986250	3907900	0.369572	fail	fail
Q4J906	0	0	0	0	0	0	0	0	0	0	0	0	0	0	0	0	0	0	0	0	0	0	0	0	0	0	0	0	0	0	0	0	0	0	0	0				Q4J906	0	0	0	0	0	0	#DIV/0!	#DIV/0!	#DIV/0!
Q4J907	6163700	5997500	4780800	4958800	3794700	4021200	3963900	3291300	4654600	4411100	4354300	3503600	4506600	3763400	3613600	3290200	3228100	3560900	5514000	5092000	4666400	4527000	5163700	4689100	6733300	5490700	5952500	4695100	4519200	4085100	5957100	5688900	6017700	5000800	4954000	5123000				Q4J907	6080600	4869800	3907950	3627600	4532850	3928950	0.0709937	fail	fail
Q4J908	2128400	2659300	2020800	2341000	1856200	1948200	1535600	1457800	2104100	2008300	1663600	1679900	1543600	1101000	1956500	2304000	1329600	1420200	2114100	2501100	2230000	2054800	2175900	2179600	2012900	2378400	2073800	1674500	1832500	1404700	2414900	2430300	2371400	2072600	2176300	2056500				Q4J908	2393850	2180900	1902200	1496700	2056200	1671750	0.0266205	fail	pass
Q4J909	6235100	6458400	5852100	6168200	4702000	5460600	4041400	4146600	5478600	4912400	5093800	5049500	5045900	4268700	4908800	4716400	3977000	4615000	5753800	6416900	6286100	5508100	5886800	5779000	5989400	5911300	5695200	4887200	5005800	4754000	6368600	6334100	5988200	5154500	5630700	5443100				Q4J909	6346750	6010150	5081300	4094000	5195500	5071650	0.015326	fail	pass
Q4J910	880850	875090	839880	752310	608900	689230	686050	728010	575680	647640	709210	803990	631120	651450	701200	821340	414810	591530	768930	851110	719130	783030	832450	827670	1178500	1231400	1037800	841460	635600	604120	887770	980370	757320	847020	1016300	1128700				Q4J910	877970	796095	649065	707030	611660	756600	0.163578	fail	fail
Q4J911	1211700	916400	899180	956300	1308600	1278400	1119100	931240	937550	823200	813390	1143700	879640	626410	766000	694770	948080	1038300	979440	864490	835330	958620	885460	956800	858840	797030	764660	444190	1319700	881230	618630	1020800	882320	631910	1058900	1048300				Q4J911	1064050	927740	1293500	1025170	880375	978545	0.198541	fail	fail
Q4J912	2196100	1511200	2482000	2372300	2995500	3067100	3268000	2759100	2856700	2676100	2557300	2468700	1916800	1514100	1787400	1636900	1560900	1183000	1734900	1158000	2825000	2479400	2305900	1992100	1666100	1325100	1217100	790430	3026700	2692800	1457500	1124500	1641200	1303000	2095400	2150200				Q4J912	1853650	2427150	3031300	3013550	2766400	2513000	0.237424	fail	fail
Q4J913	809960	745280	1706200	1339000	2117900	1731000	2227400	2570800	2414600	2301800	2395300	2374600	959780	524930	559340	256400	3740300	2531600	1204400	401090	2473500	1967300	2257500	1351500	936510	340430	1279700	385640	2907200	2853700	1831400	1324800	677150	452240	2301500	1527900				Q4J913	777620	1522600	1924450	2399100	2358200	2384950	0.0016722	pass	pass
Q4J914	3381400	3244500	4167200	3954400	3206200	3191300	3670700	3345300	3100000	2895200	3598200	3255000	4066200	3475500	4000000	3003400	2855100	3176000	3959900	4375200	3717600	3633000	4606800	4233300	4521000	4465300	4009100	3109500	3186100	3166900	4167200	4212100	3492500	3075000	4010200	3680000				Q4J914	3312950	4060800	3198750	3508000	2997600	3426600	0.336823	fail	fail
Q4J915	2301600	2249300	2127800	1987200	1792900	1640700	2241100	1770400	2096200	1768100	1947500	1818100	2538200	1895100	655420	1838500	1696800	1873200	1956700	1982600	2331200	2000800	2504600	2080700	2632400	2416600	2307100	1820000	1865700	1698900	2465200	2352100	1685100	1773600	2272400	2308400				Q4J915	2275450	2057500	1716800	2005750	1932150	1882800	0.57775	fail	fail
Q4J916	2193700	2111200	1871900	1912000	1732700	1978300	1911600	1656700	1993900	1871900	1940500	1772400	2581200	2037600	2241900	2290700	1798200	2078000	2540800	2313000	2409100	2255500	2345200	2214000	2545700	2647700	2315600	1886500	1930200	1960700	2657300	2649700	2409200	2153300	2454600	2312700				Q4J916	2152450	1891950	1855500	1784150	1932900	1856450	0.22816	fail	fail
Q4J917	504860	1041700	664580	113280	88200	186670	759640	419560	595300	893410	854930	305430	584030	0	0	0	211090	401260	1132700	785900	246240	417000	305340	159150	1031900	936040	1212400	668740	241610	575910	224420	331110	519240	0	499390	424300				Q4J917	773280	388930	137435	589600	744355	580180	0.28774	fail	fail
Q4J919	2286200	4701200	1541800	1975000	1302400	1680100	967590	1479000	2632600	3912700	1177400	2078500	677320	2112000	3245900	3349800	819420	1805200	973670	2401400	948260	1945800	679140	1618400	2313600	5494100	1415300	3107500	1233000	2529900	1762600	1948800	2172100	5943800	1944500	4266300				Q4J919	3493700	1758400	1491250	1223295	3272650	1627950	0.767664	fail	fail
Q4J920	5599200	4274000	8659100	7603400	7796400	7174600	8549900	7038200	8138000	7657400	7455000	7679900	7500500	5462200	4444600	3048200	7493700	6921200	6597400	5119700	8268600	7004100	8368700	6811200	6595400	4195700	7048800	4930100	7682600	7008600	7476500	6721500	4413000	2837500	8170700	6343700				Q4J920	4936600	8131250	7485500	7794050	7897700	7567450	0.222739	fail	fail
Q4J922	66043	103500	104220	105660	101480	127450	78680	75508	92474	82179	85691	100860	102610	80658	88375	106490	70920	94102	122590	138420	112750	85233	96258	91000	151480	162910	122560	105720	82189	85869	131410	160950	86368	57992	122050	106930				Q4J922	84771.5	104940	114465	77094	87326.5	93275.5	0.113923	fail	fail
Q4J923	3401300	3504400	1746700	1850000	1746900	1991800	1123700	1149700	1804800	1804300	1766200	1870800	2457200	2196100	3111400	3195000	1846700	2121900	2614300	2921600	2506900	2380300	2182900	2375900	3279600	3381700	2626900	2332400	2528900	2748600	2710800	2581300	3067300	3323900	2186200	2419900				Q4J923	3452850	1798350	1869350	1136700	1804550	1818500	0.0605467	fail	fail
Q4J924	0	36368	79750	82950	145060	101210	38089	48608	111170	93122	127820	129560	242880	180330	60691	147250	279350	254900	104970	67485	165590	166280	273730	132770	215870	213830	212900	155300	287280	302930	165760	155110	28658	86937	195570	137630				Q4J924	18184	81350	123135	43348.5	102146	128690	0.527495	fail	fail
Q4J926	1536700	1570000	1378700	1543300	1812600	2443400	1907200	1821600	1785700	1764900	1241500	1422800	1681300	1430300	1030800	1499400	1621500	1927600	1788500	1903400	2130200	2133500	2244700	2197000	2154600	2454400	1789600	1514300	1323500	1532400	1892400	2030100	1013000	1007500	2644000	2629600				Q4J926	1553350	1461000	2128000	1864400	1775300	1332150	0.770752	fail	fail
Q4J928	5013100	4804200	3394600	3203200	3740000	4163100	4329000	3227800	4200300	4009400	2619600	2836500	3904300	3575100	5146400	5444400	3056700	3306900	4813100	4943200	4853100	4423000	4651400	4438700	5463900	5195100	3862600	3489800	2693700	2733200	3936900	3939700	4583700	4703900	5438500	5049400				Q4J928	4908650	3298900	3951550	3778400	4104850	2728050	0.25475	fail	fail
Q4J929	72027	43773	88668	47677	69962	80921	104550	83603	67164	44455	91542	102420	53246	66063	128980	112630	70258	131570	74904	104910	85468	89696	69380	75226	77442	103520	102170	86769	68880	112260	80549	130150	0	0	98773	108880				Q4J929	57900	68172.5	75441.5	94076.5	55809.5	96981	0.233219	fail	fail
Q4J930	295740	591840	337540	435410	553930	740020	515500	566390	326540	302500	322490	379280	180540	257250	417920	645970	295440	459990	345660	537850	273500	554200	272270	503360	408830	660710	290320	388200	332790	438640	415370	496000	385740	947260	261210	530110				Q4J930	443790	386475	646975	540945	314520	350885	0.298325	fail	fail
Q4J931	1286900	799230	1218500	1176600	1039100	1882400	1984300	890760	1401700	1096400	1335900	1292900	1155100	787070	1501300	406380	1473400	1030200	1141200	0	1200600	1837200	1477300	1164900	1633200	786510	1387600	583060	1522300	2890400	1231700	981850	1330300	561060	1837700	1021600				Q4J931	1043065	1197550	1460750	1437530	1249050	1314400	0.646171	fail	fail
Q4J932	3626200	3643100	1042600	1149700	695160	743070	712010	588010	1502200	1356200	563800	369010	672610	718260	979370	897060	751360	590810	193170	1476200	686290	1250400	853960	1246900	1837300	1548300	1379400	1337500	437550	534020	784990	1610800	1724200	2339100	1051100	1896300				Q4J932	3634650	1096150	719115	650010	1429200	466405	0.143331	fail	fail
Q4J933	5644100	5884600	2499500	2542800	2373900	2725100	2486400	1943100	5727200	5391700	1465700	1599300	1332400	1222600	1482400	1578100	897310	1138800	1886600	2183900	2164600	2018000	1706200	1902900	2383800	2407500	1893000	1826700	1607500	1421000	2380500	2518400	2377900	2680500	2202200	1976500				Q4J933	5764350	2521150	2549500	2214750	5559450	1532500	0.636548	fail	fail
Q4J934	5020300	5281700	1608200	1572300	1469900	1481000	1676100	1510400	3893100	3686700	1345600	1255700	1358900	1144000	1859300	1870500	919680	1029500	1656400	1730300	1276300	1265300	1332500	1366900	2083700	2171800	1770300	1531900	1334100	1260500	1886700	1984500	2101600	2134700	1641000	1563600				Q4J934	5151000	1590250	1475450	1593250	3789900	1300650	0.587584	fail	fail
Q4J935	5594500	6048500	1776000	1961500	1371400	1589100	1962500	1796400	4262300	4022900	2108000	1039500	2074900	1449800	1725400	2099500	1194200	985100	1910800	1779900	802590	1829400	1713200	1610900	2150100	1725600	2303200	1482300	1365700	1065000	2200300	2038700	2690300	2343700	1666000	1206600				Q4J935	5821500	1868750	1480250	1879450	4142600	1573750	0.62077	fail	fail
Q4J936	1516600	1824800	1199900	1180300	1234800	1487200	1316800	1211100	1873200	2092300	1081600	1245800	628800	482290	534450	292880	817670	1039000	865750	726510	1371800	1240800	718240	1037900	1069500	1124700	875430	754560	1114300	1105500	1232100	1183800	830470	698590	1187800	1358000				Q4J936	1670700	1190100	1361000	1263950	1982750	1163700	0.755606	fail	fail
Q4J937	8356700	8335800	7056700	6636400	6178100	6498000	6052700	5929000	5611500	5645600	5853300	5675500	7445700	6946500	9817300	10554000	5565100	5855200	8712900	10548000	7086100	6979200	6783600	7799300	9807600	10668000	8812200	7604200	6454100	5794000	7895500	8018600	10311000	10620000	7473500	7671900				Q4J937	8346250	6846550	6338050	5990850	5628550	5764400	0.00564941	pass	pass
Q4J938	2404300	2903900	1554900	1748000	913860	1275200	988060	917330	2070700	2012200	1543900	1643600	3645800	2914200	3787600	2814200	2276800	3049100	4198200	4601100	2663700	2281900	2223200	2345600	5083100	5459500	4182300	3655700	1620700	1644100	4002400	4355800	4788800	3727200	4158700	3914900				Q4J938	2654100	1651450	1094530	952695	2041450	1593750	0.470821	fail	fail
Q4J939	4594500	5582300	5729000	5489700	5260500	5622600	5630400	6028700	4598400	4465700	5010800	5619000	4447900	4443600	5900000	7255200	4531900	5442900	5136100	5854200	5870200	5692000	5717900	5373700	6258100	6700400	5073700	4894000	4541400	5129200	5207200	5433900	5690900	6565300	5409100	5713500				Q4J939	5088400	5609350	5441550	5829550	4532050	5314900	0.627279	fail	fail
Q4J940	6697300	7011000	5281000	5372600	5006500	5855100	5629700	5751900	4664100	4879200	5492800	4758200	8177600	7261600	9445900	10644000	5172800	5270200	8259300	8711800	6030700	5923500	7127900	6304200	8605600	8077000	7518900	6243300	5037600	5123400	7342300	7265700	9387700	9333700	6370000	6115300				Q4J940	6854150	5326800	5430800	5690800	4771650	5125500	0.111688	fail	fail
Q4J941	1832100	1808500	1328600	1276100	1182300	1145300	855280	700750	1152300	1020400	1187700	963300	1319000	1172500	1688600	1696400	940100	941530	1686900	1872900	1413600	1322900	1458500	1372000	1672500	1797100	1472900	1319400	1090000	975540	1528200	1597500	1614200	1559400	1441100	1363100				Q4J941	1820300	1302350	1163800	778015	1086350	1075500	0.0122437	fail	pass
Q4J942	0	0	5950.1	0	0	29637	18188	17206	23479	20701	8848.6	27804	0	0	0	0	73409	32980	0	0	14751	15723	0	0	0	18725	0	13753	21083	37347	0	0	0	0	20225	15688				Q4J942	0	2975.05	14818.5	17697	22090	18326.3	0.0347734	fail	pass
Q4J943	108200	151150	102080	175310	150400	150480	77831	48644	121640	85908	154310	151100	177670	114120	0	77075	169200	188710	178890	195200	153860	186410	126400	173820	117480	137310	153000	85906	139130	96868	135610	182300	183260	196950	114400	86793				Q4J943	129675	138695	150440	63237.5	103774	152705	0.145506	fail	fail
Q4J944	436970	417140	360360	447830	369840	409150	348090	330700	303770	294960	387750	424600	380320	384490	621400	506490	249770	309890	426840	476030	437520	437020	369490	432880	506620	563690	346640	334370	365210	370860	303700	392780	530230	445450	478680	473400				Q4J944	427055	404095	389495	339395	299365	406175	0.0411194	fail	pass
Q4J945	2523500	2682900	2678700	2732000	2228600	2693700	2170000	2191300	2381900	2356600	2481200	2821300	2749300	2535800	2862000	2580500	2066600	2513400	2865700	3000000	2777300	2935100	2697700	2827600	2926500	3068500	2968100	2471200	2625900	2776700	3026100	3089200	2762900	2805100	2939200	3015900				Q4J945	2603200	2705350	2461150	2180650	2369250	2651250	0.159006	fail	fail
Q4J946	156020	201890	227730	196870	171010	173780	279270	182570	187450	199200	233740	216990	209650	152470	346320	325610	134160	119270	236680	311150	249480	139100	199120	173590	241380	273160	332030	229350	209920	88065	292160	193000	407490	421130	205640	184700				Q4J946	178955	212300	172395	230920	193325	225365	0.145721	fail	fail
Q4J947	487720	526680	519070	553530	466910	564860	496690	445560	481000	452940	481780	564510	450260	432730	557770	588070	390690	521940	555730	553130	556550	533200	599050	557490	669470	780010	555650	501290	448060	447150	601840	589560	516690	614700	631600	665090				Q4J947	507200	536300	515885	471125	466970	523145	0.188055	fail	fail
Q4J948	810390	650380	0	431170	155390	236080	0	0	0	278130	115940	0	0	256190	67745	271740	0	0	437860	421440	0	206870	0	138820	0	553080	83298	406350	0	0	0	571660	456340	690290	0	501950				Q4J948	730385	215585	195735	0	139065	57970	0.0410631	fail	pass
Q4J949	95440	127730	45361	77114	41725	25063	43302	32295	60192	89785	99436	114920	139120	124200	154420	136340	133850	123860	114450	84934	107380	79771	109830	143280	224760	252150	221210	163940	171530	176200	121750	171150	89808	95991	186380	184520				Q4J949	111585	61237.5	33394	37798.5	74988.5	107178	0.829453	fail	fail
Q4J950	1142300	1015100	1199100	1080500	888190	991120	1183100	799980	740630	601280	1162200	1242200	887330	861090	908660	1020300	755930	841180	913000	1168600	1162500	1050500	1162900	1049600	714210	802270	796450	760180	987670	952890	1060700	1044000	839540	784170	802660	852310				Q4J950	1078700	1139800	939655	991540	670955	1202200	0.435529	fail	fail
Q4J951	87148000	91971000	51939000	52594000	43964000	49429000	44820000	42833000	37942000	40221000	34695000	36203000	42756000	43825000	70672000	69606000	30518000	32490000	63480000	72597000	50179000	51230000	50870000	56106000	70106000	75767000	57469000	54940000	35527000	31408000	51986000	56958000	74082000	90047000	52302000	51563000				Q4J951	89559500	52266500	46696500	43826500	39081500	35449000	0.0228821	fail	pass
Q4J952	584850	463740	244210	210840	211810	0	294980	286790	265880	262180	278510	127180	397590	312480	360530	414290	233100	147580	402610	349900	162060	112610	228630	200310	483600	406250	554070	435150	240310	80698	306820	208040	727250	643460	300380	233690				Q4J952	524295	227525	105905	290885	264030	202845	0.714552	fail	fail
Q4J953	7742600	6672200	4013100	3817500	5292100	5036200	5211900	4582000	2410700	2045900	3439200	3247400	3812400	3396100	5607800	5157900	3134000	2396400	5847100	5838800	3582500	3453200	4659000	4107200	3374900	3142600	3234200	2772700	3323400	2711400	4011100	4118000	5595300	4932600	3194700	2772800				Q4J953	7207400	3915300	5164150	4896950	2228300	3343300	0.0355747	fail	pass
Q4J955	2651900	2050900	3778300	3845000	3228600	3838200	3331400	3177200	3507300	3073500	3336400	3848800	3295000	2213800	2416500	2277600	3207900	3459700	2434200	1690800	3953000	3588900	3793900	3008500	2946000	2484200	3133100	2085100	3691200	4128200	3456400	2802100	2095200	1858800	3864600	3822400				Q4J955	2351400	3811650	3533400	3254300	3290400	3592600	0.659798	fail	fail
Q4J959	59551	0	99679	88356	68149	18914	25186	56459	15718	45639	36651	45601	39436	60235	0	61692	34414	49848	0	93884	69899	86995	32151	57628	46401	45189	62531	80565	51209	73630	83371	95883	0	82524	72656	0				Q4J959	29775.5	94017.5	43531.5	40822.5	30678.5	41126	0.310649	fail	fail
Q4J960	0	51351	54767	71018	52230	62691	28299	0	62261	67970	73134	84812	0	45102	129620	202960	78526	59043	94810	127380	93838	88544	0	76955	73595	144430	41229	104050	106220	97686	99744	140240	61386	55607	95065	119740				Q4J960	25675.5	62892.5	57460.5	14149.5	65115.5	78973	0.811294	fail	fail
Q4J961	649130	894130	573820	714690	508420	731350	537940	751640	495980	715210	604750	791080	619240	706740	1059600	1405700	476450	645080	733090	775490	614170	707620	689630	782740	709770	1110400	656110	656670	580510	645290	694020	843000	893400	1236500	753100	836160				Q4J961	771630	644255	619885	644790	605595	697915	0.701741	fail	fail
Q4J962	427940	383370	258030	273340	262320	334990	308820	290990	353810	301830	345800	275020	306680	328870	326430	292430	252170	276150	450830	458370	323630	321570	331660	303380	425760	469490	352190	363240	322800	266820	301360	391950	402520	386690	327640	354220				Q4J962	405655	265685	298655	299905	327820	310410	0.743851	fail	fail
Q4J963	1339500	1273700	1250500	1369200	1210900	1218400	1530600	1149500	1204900	1214300	1402900	1307700	1570700	1114400	754190	806650	1263400	1612900	1329600	1462100	1436200	1320200	1361800	1324700	1514100	1589600	1363300	1204700	1396100	1352700	1428700	1308800	978310	1248200	1687800	1582000				Q4J963	1306600	1309850	1214650	1340050	1209600	1355300	0.709555	fail	fail
Q4J964	648900	795090	498850	466940	359900	405250	158210	176060	257410	267200	206010	228470	284090	258180	408350	426520	190910	235310	557720	803490	487740	503140	470450	541470	498010	667910	370200	386080	249350	257760	591200	657050	587440	634960	436820	473610				Q4J964	721995	482895	382575	167135	262305	217240	0.00108098	pass	pass
Q4J965	2010800	2299500	2064300	2024500	2036100	2287200	2441300	1865500	2303700	2140000	2201300	2264400	2144300	1999200	2164500	2117900	1741900	2009700	2061300	2492400	2245800	2381700	2117800	2341300	2262100	2547100	2268800	1966900	2161500	2052500	2527100	2306900	1863000	1911100	2184100	2413900				Q4J965	2155150	2044400	2161650	2153400	2221850	2232850	0.414162	fail	fail
Q4J966	2818300	2877300	1722100	1775900	1536700	1689200	1518000	1514800	1461000	1434300	1524400	1509400	1822200	1723300	2680600	2555800	1223700	1287700	2133300	2327100	1683800	1714400	1872200	1790500	1313300	1394200	1355500	1223400	1298100	1314900	1822300	1899900	2138400	2065500	1121000	1170800				Q4J966	2847800	1749000	1612950	1516400	1447650	1516900	0.042979	fail	pass
Q4J967	0	0	46440	72081	91852	91153	76416	62077	69115	49253	0	80574	0	36270	0	0	71400	87577	0	44430	56155	69071	69257	60644	91093	16220	53514	0	73495	98270	63430	61931	0	0	73470	70603				Q4J967	0	59260.5	91502.5	69246.5	59184	40287	0.782467	fail	fail
Q4J968	174730	197080	277820	232550	249950	287790	281280	201290	170450	184030	252470	236890	251570	231570	409330	355100	201440	219990	230320	260660	261020	222470	255820	254240	290230	353800	259420	209260	220470	234170	290010	238280	203680	227370	263920	275180				Q4J968	185905	255185	268870	241285	177240	244680	0.550511	fail	fail
Q4J969	106000	175400	315490	351500	255790	311360	277650	356150	291720	461040	188460	329720	126930	269210	44228	92447	101020	179790	81347	123550	198990	408010	140990	199280	122180	284010	103610	133020	233920	382520	105110	142390	66309	0	253120	388200				Q4J969	140700	333495	283575	316900	376380	259090	0.253032	fail	fail
Q4J970	326550	124030	208420	254650	189960	295140	244090	198320	205210	205620	171630	304640	169060	229050	307880	319560	140800	246770	243370	152560	197510	286520	219180	304770	218960	300210	140820	115890	155390	211940	242590	253080	153470	311980	192700	247250				Q4J970	225290	231535	242550	221205	205415	238135	0.753606	fail	fail
Q4J972	1131700	1319500	1699100	1786600	2739300	3172200	1595800	2041400	982000	1377800	1833800	3944300	1873000	1631600	2000000	2462000	1411900	2010500	1364400	2311700	1827600	2122900	2755700	2109700	1063600	1345000	1027400	284950	1229500	2216900	1392000	2286300	1593900	1307100	1106600	1599000				Q4J972	1225600	1742850	2955750	1818600	1179900	2889050	0.982304	fail	fail
Q4J973	35136000	23145000	6594100	6418100	5929000	6483900	4454500	4841900	6842500	6812900	6449600	6077700	14887000	11488000	14781000	14823000	6886000	6653300	12811000	11603000	6413500	6938400	8434900	6247100	10294000	9962100	11126000	8201600	4990900	5133900	9134900	8440500	19630000	17848000	7788300	6923300				Q4J973	29140500	6506100	6206450	4648200	6827700	6263650	0.143599	fail	fail
Q4J974	5876000	6590600	5646500	5281500	5645800	6309600	4471300	4500900	3428600	3657900	5548900	5693900	4156800	4353100	7267200	7994300	3640500	4661300	6629300	8000900	4846400	5350800	5835700	5381000	4580500	5495600	4630700	4300600	4476200	4499300	5345600	6060600	6946900	5826800	4860300	5353600				Q4J974	6233300	5464000	5977700	4486100	3543250	5621400	0.0107654	fail	pass
Q4J975	660670	641990	462280	514420	268260	241920	260050	244960	301500	285880	189870	212650	218380	195050	304930	290990	146400	180710	568550	571760	485490	500960	491430	506000	670680	713740	553290	470030	238640	267250	594710	653480	582160	439070	649310	659130				Q4J975	651330	488350	255090	252505	293690	201260	0.0166776	fail	pass
Q4J976	719400	1198800	621210	914630	899860	964390	763940	889710	1390400	1425000	787740	1060500	1039800	887770	1237500	1035100	769900	987600	694200	1067300	659510	1116100	641960	1157600	667720	1400100	978290	829710	1147300	739520	803320	1156700	678730	1046900	692290	1501200				Q4J976	959100	767920	932125	826825	1407700	924120	0.27936	fail	fail
Q4J977	4528800	4484400	3489900	3331800	3758800	4022500	3230100	3061100	3216600	2958200	3176200	2826400	3480100	3130200	4604600	4540100	2784500	2957700	3619200	4414400	3881000	3560800	3764700	3567200	3492800	3902900	3594300	3067100	2931900	2509100	3645000	3470500	3896300	3702900	3533300	3079600				Q4J977	4506600	3410850	3890650	3145600	3087400	3001300	0.00254748	pass	pass
Q4J978	1791900	1917800	1463500	1655900	1901800	1784900	1569100	1807600	1423800	1482000	1429000	1641300	1378900	1463100	2000500	1922400	1030100	1450000	1343700	1915300	1532200	1652200	1774600	1831100	1807100	2622900	1466000	1443400	1362300	1185200	1435000	1590400	1648700	1678000	1451100	1861400				Q4J978	1854850	1559700	1843350	1688350	1452900	1535150	0.061763	fail	fail
Q4J979	2248800	2051000	1089000	1176800	1239500	1499200	1277800	1183800	1186400	1157700	1232400	1204400	1473700	1267800	1757000	1842100	1064900	1176300	1731100	1738900	1233200	1302200	1486000	1300200	2018500	1739100	1668500	1418000	1193000	1127700	1540500	1533500	2587800	2356200	1509300	1464800				Q4J979	2149900	1132900	1369350	1230800	1172050	1218400	0.116404	fail	fail
Q4J980	1371300	1554200	1176200	1124900	1162200	1181300	1119100	1065900	1136700	1124800	1065800	1016500	1271200	1150700	1475400	1418600	1006600	1132900	1293600	1397400	1330800	1325400	1281200	1261300	1521700	1601100	1371900	1222000	1049600	1000800	1520000	1553100	1389500	1468100	1343400	1247400				Q4J980	1462750	1150550	1171750	1092500	1130750	1041150	0.0343573	fail	pass
Q4J983	901670	738970	802020	750870	623580	818710	823660	647910	742960	849980	739470	934300	820790	619060	870790	808140	589160	843780	733030	703980	922890	900390	871470	877730	1012200	1165000	916760	726890	849460	922680	992370	990190	750360	1071000	1054000	963300				Q4J983	820320	776445	721145	735785	796470	836885	0.766531	fail	fail
Q4J984	266360	282770	462200	458730	384460	407610	586510	440040	286850	437650	468020	391410	286210	296120	229950	114600	249940	284430	300550	299390	629580	513730	464500	466140	332020	533010	427210	348470	427690	276000	440540	422300	355780	249190	509590	489300				Q4J984	274565	460465	396035	513275	362250	429715	0.298213	fail	fail
Q4J985	29886000	29399000	18378000	16854000	27328000	31732000	23084000	23829000	15212000	14153000	22004000	22008000	28265000	24491000	41206000	41662000	21248000	19815000	28051000	29722000	21567000	20361000	25186000	20121000	10534000	11384000	19523000	15507000	17825000	17624000	22133000	22162000	29226000	30028000	9958500	8410200				Q4J985	29642500	17616000	29530000	23456500	14682500	22006000	0.105392	fail	fail
Q4J986	1399100	1506100	882700	947710	1311200	1302600	1106300	1200600	1049600	1096500	912910	874050	850090	1011200	1087300	1099300	692480	1084300	910520	1277000	903180	1129300	1150200	1262600	1246800	1442000	996070	1155000	729250	827730	946850	1078300	1040100	1260000	1108300	1230200				Q4J986	1452600	915205	1306900	1153450	1073050	893480	0.137712	fail	fail
Q4J987	207220	0	65614	67265	103220	0	80789	60288	49112	22973	57661	0	0	0	0	82584	49175	48988	42422	33123	0	0	66271	0	41544	14593	52400	0	75543	72411	47680	101730	123850	0	0	128000				Q4J987	103610	66439.5	51610	70538.5	36042.5	28830.5	0.412245	fail	fail
Q4J988	0	68951	43503	73469	0	0	0	0	0	22070	24959	0	0	0	0	136340	9818.2	0	19316	146470	51683	15823	65362	0	46269	77491	49277	117660	31640	0	0	143530	0	0	29137	106340				Q4J988	34475.5	58486	0	0	11035	12479.5	0.161273	fail	fail
Q4J989	851720	959810	3121700	2866500	603300	588170	478450	419210	529830	481000	1863600	1972700	1137400	1066500	1378100	1726900	1323300	1071900	2949500	2932600	2447400	2281100	2865400	2598100	2142300	1554600	2237500	1689600	2049700	2019600	3781100	3557800	2276700	2695000	2581100	2446200				Q4J989	905765	2994100	595735	448830	505415	1918150	0.361993	fail	fail
Q4J990	1676700	2342500	1970600	2006500	1580300	1682200	1607500	1633400	1644600	1622600	2005300	1895100	2166200	2067800	2666500	2995200	1813300	1701400	2351400	2677200	1916800	1939200	1975000	2225700	2687700	3101500	2345300	2173800	1818100	1866600	2550600	2517300	2754100	3095400	2131400	2314100				Q4J990	2009600	1988550	1631250	1620450	1633600	1950200	0.321732	fail	fail
Q4J991	0	0	18670	27203	31182	23156	47767	0	0	0	39110	27684	62031	0	0	37582	45892	42431	0	39841	57809	0	0	40230	0	0	0	0	47256	57291	60247	184130	36676	0	52271	10957				Q4J991	0	22936.5	27169	23883.5	0	33397	0.82457	fail	fail
Q4J993	242840	195200	149820	156590	117520	129240	169910	147260	147430	138160	192540	110050	176230	140460	117050	107960	117610	149980	184320	97749	130700	140530	156010	161090	216170	190440	175910	152910	109590	129180	168000	159010	182110	0	123230	151830				Q4J993	219020	153205	123380	158585	142795	151295	0.53331	fail	fail
Q4J995	223510	239740	240580	274400	268660	300360	256750	236070	240860	208720	257750	258720	246220	229560	299120	369400	186980	266880	272650	273150	410710	390430	276280	339340	275210	238640	266970	244360	260460	248180	308830	359880	211130	235550	305560	288030				Q4J995	231625	257490	284510	246410	224790	258235	0.317676	fail	fail
Q4J996	570420	625230	798040	723690	624720	711110	691440	592880	656060	462640	775000	824610	730000	596630	496760	315020	519400	687090	806070	750900	772890	689900	815130	726910	830370	883180	708910	522510	633710	722450	462350	443640	522030	325120	745910	708960				Q4J996	597825	760865	667915	642160	559350	799805	0.896278	fail	fail
Q4J997	0	0	20645	0	0	0	0	8924.2	95991	88056	0	0	0	0	0	0	81093	0	0	0	0	0	0	0	0	0	0	0	14554	56964	0	0	0	0	23102	0				Q4J997	0	10322.5	0	4462.1	92023.5	0	0.167934	fail	fail
Q4J998	78880	200960	25087	0	0	0	0	0	84806	94618	58111	0	0	0	0	161590	0	0	0	0	0	0	0	0	170870	172970	160050	0	96669	0	0	0	71201	0	50048	24488				Q4J998	139920	12543.5	0	0	89712	29055.5	0.769803	fail	fail
Q4J999	11488	24699	60427	56689	44565	45046	54513	42136	48303	26038	61727	56743	55036	54910	68048	63861	55339	50603	80704	70288	81659	69640	0	60373	49329	39157	0	37917	71798	59800	82382	72004	0	21716	60573	61483				Q4J999	18093.5	58558	44805.5	48324.5	37170.5	59235	0.425114	fail	fail
Q4J9A0	568800	724560	585990	569770	360690	564930	504610	447810	546690	467620	600030	613900	701470	561930	784080	989940	499440	688180	630750	768390	560330	690580	516850	590360	829480	919600	674610	587810	594270	700130	647990	753850	745510	807870	563160	639170				Q4J9A0	646680	577880	462810	476210	507155	606965	0.570336	fail	fail
Q4J9A2	1106700	710100	867670	924290	864370	979950	776270	690830	663660	588290	1072200	1106700	1062200	1138200	1020400	1497800	1742500	972350	1144000	1548000	1555800	1237300	1035500	1201500	1143200	912150	961650	628350	617830	990630	898220	665300	607000	1189800	1133100	979090				Q4J9A2	908400	895980	922160	733550	625975	1089450	0.398443	fail	fail
Q4J9A3	157140	156590	100740	115630	76081	103990	30348	88162	136080	142280	87195	102590	186900	156480	110410	138700	122400	118860	164940	153120	135960	143010	141280	132430	196810	165010	157460	132450	80661	96047	169090	164840	151140	177590	160140	168100				Q4J9A3	156865	108185	90035.5	59255	139180	94892.5	0.354704	fail	fail
Q4J9A4	348490	427650	353450	314270	388320	463350	384400	292250	407190	354960	374280	504970	378900	331810	403300	242650	331250	407630	298440	427000	440300	436760	310140	355900	309890	342470	351160	280960	366110	465340	425630	540820	274720	254940	406770	458930				Q4J9A4	388070	333860	425835	338325	381075	439625	0.919922	fail	fail
Q4J9A5	107490	65077	64313	72440	80689	87226	88144	33168	80285	70156	67736	62671	97269	43213	67877	102970	76703	60697	134500	174460	104160	104750	101170	96846	109710	109700	92574	84314	59566	49842	135780	110060	120300	123640	86105	66740				Q4J9A5	86283.5	68376.5	83957.5	60656	75220.5	65203.5	0.248682	fail	fail
Q4J9A6	2799800	3212800	2733600	3077400	2314100	2478200	2673400	2562800	2544000	3032800	2890300	2616400	2477800	2688200	3325500	2960300	2909100	2769700	2724800	3513000	2764100	2943000	3051800	2784000	3115200	3206500	3157400	2641300	2841900	3147800	2951000	3066800	3331200	4096100	2887000	2701400				Q4J9A6	3006300	2905500	2396150	2618100	2788400	2753350	0.765938	fail	fail
Q4J9A7	1522700	1082400	1190600	1082300	920200	656400	1096100	871490	1190400	999870	994510	792820	1172500	1118900	1098800	1207700	992810	722470	1281200	1308900	1066000	1051200	1345900	1188200	1818200	1649500	1539000	1161300	954400	973680	1164400	1490600	1710500	1736600	1453400	1345100				Q4J9A7	1302550	1136450	788300	983795	1095135	893665	0.532574	fail	fail
Q4J9A8	1439900	965090	2203800	1941800	2770300	2301400	2818000	2592800	3314100	3110900	2568700	2088800	1519500	777960	766060	855760	2574300	2562000	1436300	682450	3086100	2093100	3185500	2193600	1200600	423850	1018700	409000	3648300	2150100	1264600	851550	902030	447620	3461100	2014800				Q4J9A8	1202495	2072800	2535850	2705400	3212500	2328750	0.0288063	fail	pass
Q4J9A9	195550	175240	133760	121560	172730	206930	191570	169260	197560	172130	169380	179370	128590	141310	301380	275150	120910	198680	190250	195380	181940	183220	159860	186050	148510	225210	226010	228530	217460	241750	213000	260810	137930	196220	169630	211880				Q4J9A9	185395	127660	189830	180415	184845	174375	0.421589	fail	fail
Q4J9B0	157990	138050	158840	154140	157830	190960	170360	128790	141310	116550	142030	160800	156530	114000	79287	81871	102050	135050	160380	191310	159860	160510	185690	161970	163910	153630	169070	140090	133180	156790	176710	173340	60588	88356	185630	158210				Q4J9B0	148020	156490	174395	149575	128930	151415	0.159053	fail	fail
Q4J9B1	2143100	2825800	1195700	1289900	1245100	1422600	1608100	1743100	2629200	2938600	1575200	1419400	1524300	1451100	529530	1849000	427790	702730	1395600	1362000	950400	913760	1774600	1358700	904300	632600	1062400	949220	868020	747430	1557800	1168100	2033600	1411600	1106400	856670				Q4J9B1	2484450	1242800	1333850	1675600	2783900	1497300	0.442478	fail	fail
Q4J9B2	5545800	10705000	5598400	8295000	7899800	8253400	4165300	6679400	2512100	3945700	3368800	5290500	1386300	3507800	6809600	7173900	4007500	5822500	4455400	10997000	7220500	7999100	3847500	11452000	4115500	10071000	3231300	6268500	3240800	4542600	6206300	8713200	7124200	11352000	3954300	8859700				Q4J9B2	8125400	6946700	8076600	5422350	3228900	4329650	0.00665526	pass	pass
Q4J9B3	2653200	2720100	2140800	2388800	1787100	1894600	1830100	2014900	1324400	1755100	1759000	2177200	2087400	2031600	2724300	2826100	1629700	1910100	2381000	2839400	1928200	2206000	2262900	2326600	2772100	2833000	2423400	2380500	1931400	1909700	2481300	2983700	2913300	3490000	2540200	2584000				Q4J9B3	2686650	2264800	1840850	1922500	1539750	1968100	0.0445494	fail	pass
Q4J9B4	100460	0	48700	0	57295	0	68422	11038	108140	25728	0	0	75019	24774	22303	55058	89747	118070	91186	36692	43640	6812.5	30937	0	0	56609	27963	0	20718	0	67705	18653	0	44648	37127	0				Q4J9B4	50230	24350	28647.5	39730	66934	0	0.963839	fail	fail
Q4J9B5	2778500	2181800	1468600	1202900	2333600	2686400	2292100	1844000	4099000	2993100	2606500	2921400	2200600	1719300	1567400	1079500	3316300	4479800	3885700	2798800	2289600	1841600	2316800	1366800	1485500	1279900	3314200	1200100	4891200	8253200	2725600	3918400	1688700	1386100	3320000	2823600				Q4J9B5	2480150	1335750	2510000	2068050	3546050	2763950	0.125325	fail	fail
Q4J9B6	3466300	3109400	1903700	1642800	2180000	3914600	3412600	3477600	2396700	1959000	2016200	1911900	3148900	2331600	3939000	2782700	2293500	2121500	3313100	3178700	2774600	2287600	3039100	2826700	3673500	3043300	6287800	4011600	4667800	4872200	3202700	2647200	3060200	3221300	2831700	2317200				Q4J9B6	3287850	1773250	3047300	3445100	2177850	1964050	0.724956	fail	fail
Q4J9B8	299940	410630	543830	658070	484460	569180	540200	520050	368830	350550	483780	527670	606840	407660	714560	590460	446770	460700	535640	511520	537710	390690	422200	492260	464320	380880	611060	410650	552670	590290	486430	677760	421300	402640	446820	468240				Q4J9B8	355285	600950	526820	530125	359690	505725	0.647728	fail	fail
Q4J9B9	98806	313220	151220	0	182480	195220	86305	189420	223530	276920	255910	198070	88365	255720	0	0	116300	196530	73368	266410	89005	216420	73470	208490	99500	352520	27997	68692	188380	191970	0	0	173210	421700	85152	251340				Q4J9B9	206013	75610	188850	137862	250225	226990	0.364026	fail	fail
Q4J9C0	14536000	9369200	7639200	11045000	13272000	8679600	12685000	14476000	14590000	15615000	12905000	14536000	10109000	10181000	8958400	8553500	7585600	13085000	11074000	8589900	7810100	11758000	10074000	13017000	10685000	5164100	4207300	8625900	7677900	12605000	11439000	11541000	9875200	6180900	6654400	12504000				Q4J9C0	11952600	9342100	10975800	13580500	15102500	13720500	0.0180615	fail	pass
Q4J9C1	15317000	15808000	10479000	10957000	10384000	11487000	9528100	9634300	10703000	11078000	10138000	9988700	12187000	11344000	15132000	17135000	8781900	9490100	12165000	14074000	9862600	10593000	10488000	11395000	13492000	15282000	11958000	10923000	9138800	9763400	11890000	12660000	15020000	16140000	9997500	10670000				Q4J9C1	15562500	10718000	10935500	9581200	10890500	10063350	0.0585063	fail	fail
Q4J9C2	18972	36125	141930	109960	138380	157060	152880	188290	110940	90933	121880	148260	141530	106540	95264	105710	174340	115130	201400	154780	126140	252160	169010	186030	179970	100960	114100	38308	54046	133360	182390	143810	56891	28086	201820	188950				Q4J9C2	27548.5	125945	147720	170585	100936	135070	0.235739	fail	fail
Q4J9C3	123600	133870	129940	120890	139750	148210	177940	113890	133850	120540	122380	163410	89557	145890	191740	264140	169380	166570	151800	193370	187850	153870	158080	135990	134660	186480	126740	118510	116220	200330	168920	199940	117340	156450	174790	178700				Q4J9C3	128735	125415	143980	145915	127195	142895	0.612964	fail	fail
Q4J9C4	4317900	4838400	5061500	5122100	3899000	3926000	4124300	3819500	3940600	3704700	4619200	4718700	5139900	4468700	5705700	6123200	3889300	4266400	5323900	5568200	5281700	5026200	5148900	4832300	5579700	5556600	5118400	4232600	4511200	4297300	5452300	5139900	4865300	4770300	5327300	4988800				Q4J9C4	4578150	5091800	3912500	3971900	3822650	4668950	0.219456	fail	fail
Q4J9C5	5315100	4570400	4867300	4800800	3707300	3935800	4162400	4049600	4145600	3886100	3795400	3548200	4598200	3718600	3175800	3599700	3156600	3371100	4623800	4304800	4866900	4992300	5931600	5789900	5279600	5200200	5043100	3702100	3275700	3067300	5488200	5211900	4098000	4038800	5091800	4754100				Q4J9C5	4942750	4834050	3821550	4106000	4015850	3671800	0.0469425	fail	pass
Q4J9C6	218940	254360	247390	266760	274670	249170	172610	156430	229060	313510	291450	312670	254530	258840	273170	262280	227690	306810	345680	341470	245670	296740	310730	198120	348510	333480	292750	258750	275810	337130	296660	292510	52564	187400	255110	233790				Q4J9C6	236650	257075	261920	164520	271285	302060	0.846291	fail	fail
Q4J9C8	690180	646990	818870	809570	599100	577660	696310	566930	562290	509520	786640	826020	852750	713550	934640	1002200	628650	694420	1059200	1089500	940900	778740	896780	784830	1059700	938890	756870	578600	842260	781780	799290	829340	1134500	907530	813330	735270				Q4J9C8	668585	814220	588380	631620	535905	806330	0.644323	fail	fail
Q4J9C9	3613000	4149700	1148500	1107700	375750	413120	277090	305770	1037200	1073400	368190	291930	667140	606540	1058400	1221700	446090	586960	1775800	2128900	1519300	1469600	1299700	1313000	1852900	2242000	1392300	1201700	534690	577500	2181800	2215200	2761400	3022200	2365500	2506100				Q4J9C9	3881350	1128100	394435	291430	1055300	330060	0.103275	fail	fail
Q4J9D0	163600	55829	199100	53945	66533	27775	164890	81829	161170	30158	138040	0	0	57839	166160	159970	0	233480	149990	116010	0	0	142160	0	113500	134670	186410	137960	0	0	55811	310650	85987	72657	0	286030				Q4J9D0	109714	126522	47154	123360	95664	69020	0.970024	fail	fail
Q4J9D1	258970	138020	527190	459840	591480	513330	608940	528820	424250	353960	611310	388050	551530	363850	204230	179780	584050	722220	437350	367990	597510	583190	601100	585720	383850	250800	459650	239820	632330	527090	585740	537230	195360	167110	572630	508740				Q4J9D1	198495	493515	552405	568880	389105	499680	0.425835	fail	fail
Q4J9D2	133470	139580	141480	133400	101020	118150	114210	103810	127200	103180	128470	141880	165070	120510	179640	164750	83033	111760	162680	157400	168590	146300	154860	137700	153160	154010	136000	111730	158290	128870	109650	110660	132480	134900	150700	168130				Q4J9D2	136525	137440	109585	109010	115190	135175	0.386917	fail	fail
Q4J9D4	1217200	1497200	1613000	1597300	1262900	1503000	1345500	1351400	1558400	1509800	1615300	1673400	1878000	1527300	1689100	1767700	1340900	1621900	1732600	1829400	1696400	2028600	1774300	1639000	2075500	2053100	1903600	1622800	1551000	1620600	1870700	2071300	1661700	1847200	1773300	1766900				Q4J9D4	1357200	1605150	1382950	1348450	1534100	1644350	0.509397	fail	fail
Q4J9D5	167610	44727	625210	454610	975500	715270	749240	945150	685090	731980	805370	852770	201780	96469	37464	0	1662500	1329600	67740	57525	765060	518250	768760	323940	15031	0	29411	11239	989030	1031200	303460	137620	0	0	282240	219520				Q4J9D5	106168	539910	845385	847195	708535	829070	0.0709959	fail	fail
Q4J9D6	1014300	1136300	884340	863800	870400	935360	875790	756160	873560	820530	965470	924230	1050500	917920	1499500	1399500	836490	944920	1175100	1261400	1159400	1015000	1050300	1048500	1435900	1463100	1147300	994380	970230	932500	1214900	1300900	1170400	1268800	1198500	1137200				Q4J9D6	1075300	874070	902880	815975	847045	944850	0.156122	fail	fail
Q4J9D7	922570	1607200	480720	466770	371190	542000	369100	461820	769770	541890	361220	452410	694790	664340	1289500	1242000	305850	515880	637830	860240	487300	586880	494650	731060	857560	1290900	897310	865080	437650	435520	486470	692050	922370	1342100	1094100	1114700				Q4J9D7	1264885	473745	456595	415460	655830	406815	0.262615	fail	fail
Q4J9D8	296780	314890	497430	485680	499410	423600	592120	406680	438170	366600	545770	579760	463860	347870	387200	274780	427860	549280	376990	272130	700430	551740	583430	489110	531890	500410	509220	364300	578800	470580	654010	538390	381080	292700	603700	556040				Q4J9D8	305835	491555	461505	499400	402385	562765	0.23748	fail	fail
Q4J9D9	262280	283050	238450	209700	90922	84868	63053	67456	324250	287520	267530	219700	305380	241210	290690	198460	296200	355610	294470	270570	285360	228810	249340	212370	573060	878330	520480	424720	297980	284600	416850	387450	367100	440350	778380	625630				Q4J9D9	272665	224075	87895	65254.5	305885	243615	0.866449	fail	fail
Q4J9E0	217790	329800	291420	303210	347100	374890	214790	369770	269260	393430	240610	447500	163520	229270	544460	461610	372930	379050	151710	135600	293680	427390	247260	247250	219110	481830	214670	240680	289350	402950	252440	293900	285920	559940	387260	438510				Q4J9E0	273795	297315	360995	292280	331345	344055	0.794431	fail	fail
Q4J9E1	1147300	860260	1255900	1117900	738000	478170	882140	774430	909690	803040	1101500	870920	656810	679430	462380	376170	641860	497510	693700	596640	1099800	755310	1186300	956280	1206200	994120	869210	736180	797830	554210	1071400	784210	900180	842580	1054100	1032300				Q4J9E1	1003780	1186900	608085	828285	856365	986210	0.748274	fail	fail
Q4J9E2	916940	978250	618450	718370	902100	1223300	907510	848820	782990	707330	946580	982480	1467900	1251100	1372700	1204100	904640	1130300	1138100	1349100	974560	936620	1236200	970130	1328400	1281000	1224400	1105100	895700	931100	1171300	1161700	1291000	956700	1156100	1209900				Q4J9E2	947595	668410	1062700	878165	745160	964530	0.75911	fail	fail
Q4J9E3	4794300	3475700	2494800	2403400	1932100	2038400	2586300	2239500	2166600	1753900	2339800	1572700	2350300	1729000	1954300	2098800	1400600	1355900	3040300	2682300	2247000	1937500	2618600	2366800	2513800	2189300	2146700	1670500	1640700	1386800	2137700	2037000	3169800	2526800	2003400	1944600				Q4J9E3	4135000	2449100	1985250	2412900	1960250	1956250	0.145566	fail	fail
Q4J9E4	836130	980760	656950	566330	650400	623880	587120	459890	707850	580970	423180	384030	491210	360630	564060	535590	368100	346500	631190	733940	649660	618190	677960	604470	734490	696780	574340	547970	411020	428860	735090	735020	843060	746320	725300	619520				Q4J9E4	908445	611640	637140	523505	644410	403605	0.0371316	fail	pass
Q4J9E5	970520	1118300	1009600	1068200	891850	998110	980990	1031800	948290	975350	1083300	1138300	1296900	1275200	1796100	1778500	1011300	1219800	1343500	1679700	1227400	1306400	1132800	1222300	1349600	1648100	1392200	1310100	1137300	1121200	1351700	1510000	1234600	1356400	1309200	1337500				Q4J9E5	1044410	1038900	944980	1006395	961820	1110800	0.707022	fail	fail
Q4J9E7	263630	196900	273170	282020	116430	142840	95360	58093	119850	106120	285270	281410	686100	451390	356910	377620	287250	388620	576910	374470	344460	362700	390220	355990	420650	545090	441290	369330	324550	263950	511900	471240	553690	428630	596760	552820				Q4J9E7	230265	277595	129635	76726.5	112985	283340	0.298445	fail	fail
Q4J9E8	0	0	0	0	0	0	0	0	0	0	0	0	0	0	0	0	0	0	0	0	0	0	0	0	0	0	0	0	0	0	0	0	0	0	0	0				Q4J9E8	0	0	0	0	0	0	#DIV/0!	#DIV/0!	#DIV/0!
Q4J9E9	2276900	4641100	1936200	2210100	1506500	1780700	1510000	2270100	1232100	2592700	1467600	518260	2666800	3543500	6645300	1838800	1412800	1408800	1193200	1753900	959990	1495400	2513600	2176800	0	2724700	2412900	2984500	1384500	901320	1241500	1858500	2455100	7833400	1297100	2200300				Q4J9E9	3459000	2073150	1643600	1890050	1912400	992930	0.183202	fail	fail
Q4J9F0	516810	555890	435860	364100	387350	189450	309500	385400	436340	451360	325280	163060	769660	724200	691990	443210	549510	532340	681610	686070	496580	485970	650340	500440	698710	567650	561130	545500	402410	180010	619810	498240	592730	243430	481950	428810				Q4J9F0	536350	399980	288400	347450	443850	244170	0.378545	fail	fail
Q4J9F1	173680	73667	233640	145210	141820	251400	175280	148820	125970	160450	184490	203010	197790	192040	79743	253250	233630	179560	0	242900	222670	233620	197340	153710	183390	236190	177450	228600	140390	243940	226000	207360	0	0	260340	291620				Q4J9F1	123674	189425	196610	162050	143210	193750	0.904328	fail	fail
Q4J9F2	1713300	1591000	1061800	992770	826520	761910	875730	851040	962100	942110	995970	976270	1557800	1293800	1980500	2335300	853540	706730	1818900	1820500	1053000	1128300	993750	1161200	1515700	1523800	1215500	978790	877790	885090	928330	1048500	1789000	1702500	934340	891740				Q4J9F2	1652150	1027285	794215	863385	952105	986120	0.204208	fail	fail
Q4J9F4	144570	347960	768180	822170	507430	687080	688770	614240	671550	644000	879130	989550	437220	381240	298020	250880	602830	907470	487700	221340	890280	932950	966480	783040	484180	195900	635970	281770	1014000	774990	534880	445850	72947	35518	1065300	928730				Q4J9F4	246265	795175	597255	651505	657775	934340	0.134871	fail	fail
Q4J9F5	871290	1320100	773070	800160	1147500	1147800	759620	747830	736410	765040	576700	651240	1129900	971230	1410100	1220700	641040	732530	1097700	1299500	906120	1022700	913690	1032200	1281900	1548700	1177500	1157700	1104000	1205300	980620	1086500	1274100	1470400	1106900	1078600				Q4J9F5	1095695	786615	1147650	753725	750725	613970	0.010641	fail	pass
Q4J9F6	50982	80031	125900	102500	73737	121680	95941	85233	67539	69642	108370	131280	151230	111290	100400	129590	89520	156860	86030	110100	152220	178350	115420	135790	80429	136610	104250	83892	125450	127540	143200	140820	67429	82930	134340	91366				Q4J9F6	65506.5	114200	97708.5	90587	68590.5	119825	0.973539	fail	fail
Q4J9F8	411670	365380	167390	169940	190860	249180	165950	167010	175210	198070	170000	195140	210040	204430	397260	378180	231270	258880	311950	296430	230050	235120	222940	284500	311480	517910	264390	275350	284660	360300	186010	264560	372490	378370	268190	348390				Q4J9F8	388525	168665	220020	166480	186640	182570	0.0938157	fail	fail
Q4J9F9	22267	0	31637	35047	26309	65298	18488	44043	26839	62839	25110	52618	0	0	81022	0	12920	55802	0	0	0	54790	16770	53854	0	0	0	0	19417	61700	23883	64136	0	0	10634	43117				Q4J9F9	11133.5	33342	45803.5	31265.5	44839	38864	0.480597	fail	fail
Q4J9G0	11351000	11675000	4144900	3974100	5725600	4847500	3803500	3678500	6311000	5119600	4037800	3605000	7296000	6074800	9830700	8753100	5185400	4194700	8228000	7270200	4282700	5405800	4095800	6253800	4065800	4300200	4665100	4596700	3944100	4083900	5460800	5682800	9469000	10348000	2563000	3871100				Q4J9G0	11513000	4059500	5286550	3741000	5715300	3821400	0.129401	fail	fail
Q4J9G1	4015900	3438900	3112700	2501900	3638400	4549200	1387300	1164900	1207700	1588000	1214200	886010	905850	644090	345710	207400	539990	1057500	2493800	1675400	3616400	3019700	4147500	3452000	2581900	1551900	1589000	890340	1218700	1077300	2914100	2274300	3131500	2530900	3784300	3206100				Q4J9G1	3727400	2807300	4093800	1276100	1397850	1050105	1.98691e-05	pass	pass
Q4J9G2	0	0	0	0	0	0	0	0	0	0	0	0	0	0	0	0	0	0	0	0	0	0	0	0	0	0	0	0	0	0	0	0	0	0	0	0				Q4J9G2	0	0	0	0	0	0	#DIV/0!	#DIV/0!	#DIV/0!
Q4J9G4	0	0	33352	0	0	0	0	0	63525	0	0	32472	0	0	0	0	64188	0	0	0	0	0	0	0	0	0	0	0	44093	36479	0	0	0	0	0	0				Q4J9G4	0	16676	0	0	31762.5	16236	0.412934	fail	fail
Q4J9G5	4201200	4031000	4996900	4758900	5800400	5076800	5767500	5440700	3035000	2771100	5104800	4995100	5391500	4813800	4741100	5008800	4347000	4498800	5089400	6151800	4704700	4565700	5032100	4920900	4911200	4613500	4772000	3854300	3930100	4085400	4568100	4500400	4578100	3045300	4020500	3594600				Q4J9G5	4116100	4877900	5438600	5604100	2903050	5049950	0.629259	fail	fail
Q4J9G6	5721000	6744000	3516100	3835900	4221100	4567900	3872500	4019100	1599300	1938800	2043700	2789500	2108100	2106200	2751700	2196600	2211400	2240100	3657000	3932200	3789200	4116100	3418400	2942900	2320800	2589900	1464300	1619600	3435900	2651400	2228000	2929800	3022600	4910700	2407200	3355700				Q4J9G6	6232500	3676000	4394500	3945800	1769050	2416600	0.0106304	fail	pass
Q4J9G8	936880	1120000	1338200	1275300	1457000	1578100	1291200	1066400	903420	824810	1344200	1147000	2072100	1808200	2460400	2529300	1294400	1237700	2055800	2060000	1659700	1469400	1788500	1754500	1559900	1732900	1628300	1383700	1256000	1202200	1409300	1445400	1865400	1353000	1268700	1171700				Q4J9G8	1028440	1306750	1517550	1178800	864115	1245600	0.168142	fail	fail
Q4J9G9	1972100	1919200	1638600	1526200	1217600	1338600	1330400	1116100	1655400	1551500	1597800	1562700	1838900	1534600	2225000	2374300	1377600	1413100	1993600	2076000	1782700	1638100	1699400	1644900	2120200	2182900	1954500	1537900	1523600	1558300	1980000	2071300	2295300	2364700	1856600	1714000				Q4J9G9	1945650	1582400	1278100	1223250	1603450	1580250	0.395004	fail	fail
Q4J9H0	12589000	12129000	7311900	7848400	8788900	9771400	8180100	8966000	9046000	8441100	7375200	6744400	10038000	8214600	11377000	10546000	7570000	7888600	10987000	10720000	8583300	8235700	9244200	9209200	10868000	11041000	10293000	8565000	7175600	7601800	9341100	9454800	12013000	11626000	9399700	7982500				Q4J9H0	12359000	7580150	9280150	8573050	8743550	7059800	0.127658	fail	fail
Q4J9H1	589350	568280	590610	537870	529240	446560	577600	515890	568610	444250	621560	488340	719950	582040	784800	614430	572030	406530	707290	634010	664140	479840	677150	499450	738010	721110	691460	511300	633750	470830	715870	602300	770640	650230	649020	508790				Q4J9H1	578815	564240	487900	546745	506430	554950	0.830019	fail	fail
Q4J9H2	275740	788570	775210	1114300	538210	585540	768930	1033800	260900	404610	485670	0	430120	780540	0	0	261010	562690	424670	836590	360040	872250	471830	0	662170	0	551050	489830	325880	558800	561860	0	796740	908180	279960	701750				Q4J9H2	532155	944755	561875	901365	332755	242835	0.345902	fail	fail
Q4J9H3	5696600	6055200	5395500	5235000	4898900	4304700	5327500	5205300	4641500	5015000	5067600	4687200	1830900	1550800	1909000	1886000	1069700	1103600	1503000	1625700	1391200	1421200	1762200	1669500	261560	172560	169470	104010	101020	86755	148730	115010	137800	138560	146370	137510				Q4J9H3	5875900	5315250	4601800	5266400	4828250	4877400	0.342794	fail	fail
Q4J9H4	4673300	4492300	6977000	6455500	12442000	9427300	5800200	6673600	6262000	6103700	8107700	6532100	2588100	1363100	573960	94796	421160	100720	317890	7607.9	223780	121640	307430	0	1481800	2430500	2795800	1670000	3491300	2681500	3758200	3189100	2566400	2863000	2586200	2546800				Q4J9H4	4582800	6716250	10934650	6236900	6182850	7319900	0.533177	fail	fail
Q4J9H5	1230900	1318000	1447300	1497600	2221800	2037000	2179300	2246200	1585700	1529600	1986400	1528500	1571900	1333500	1735800	2114200	1615800	1754900	1494900	1641900	1694200	1563500	1604200	1595700	1013600	1317700	1253100	841730	1372000	1366200	1259300	1218300	1362400	1583700	1375100	1084900				Q4J9H5	1274450	1472450	2129400	2212750	1557650	1757450	0.335589	fail	fail
Q4J9H6	2537400	3489000	3133700	3230500	2776000	2910700	2616600	1958500	2648200	2712400	2131500	2593700	1716000	1872200	1516400	2026900	1997200	2097300	2243800	1735500	2968700	2391500	3487100	2366100	2000100	2340700	2443400	1961000	2561400	2032000	3045600	2468800	1903400	2442800	2808000	2024300				Q4J9H6	3013200	3182100	2843350	2287550	2680300	2362600	0.0133393	fail	pass
Q4J9H7	153060	187400	272580	240380	364110	382950	428870	300770	301160	352590	305140	401030	207350	337020	370340	640880	193240	366290	341020	432480	361260	371280	267970	369100	0	186560	203260	232460	250670	383090	360600	380290	381980	250540	231950	0				Q4J9H7	170230	256480	373530	364820	326875	353085	0.0948412	fail	fail
Q4J9H8	0	0	89743	59406	70159	81074	98323	24655	90277	0	39345	35925	0	0	126200	62185	41624	61981	0	0	54487	61933	88496	56038	94815	111040	39414	48569	42550	68282	77490	58316	0	60669	89685	86723				Q4J9H8	0	74574.5	75616.5	61489	45138.5	37635	0.932282	fail	fail
Q4J9H9	680440	691300	790810	905670	583180	1014400	607690	746050	648200	779510	668860	870980	778220	758700	802210	867910	556620	839460	937080	1112000	818870	865430	905100	925720	811910	898120	792010	627890	598400	790860	808630	1017100	861720	859280	755710	728350				Q4J9H9	685870	848240	798790	676870	713855	769920	0.46918	fail	fail
Q4J9I0	25724000	27197000	13708000	14678000	13372000	14909000	12702000	12884000	15712000	15797000	12754000	12901000	17029000	15411000	21330000	22050000	11703000	11911000	18917000	20572000	13676000	13849000	13683000	14641000	21459000	24156000	19346000	16268000	12671000	12583000	16340000	17189000	25509000	26733000	15209000	16103000				Q4J9I0	26460500	14193000	14140500	12793000	15754500	12827500	0.126361	fail	fail
Q4J9I1	0	0	161950	164480	147720	124340	204490	101500	22440	124360	165280	157980	89485	47995	67868	0	55688	132300	70717	55497	218580	171980	209260	159590	95065	82708	73589	82010	148860	118460	145250	136170	0	64142	59746	155790				Q4J9I1	0	163215	136030	152995	73400	161630	0.488726	fail	fail
Q4J9I2	1458500	1642100	1316500	1248900	1282100	1477100	1733900	1702600	1554800	1511600	1606300	1758600	1688600	1522600	2488700	2845200	1602800	1930600	1559000	2010300	1716800	1754600	1599700	1746800	2056600	2237500	1918800	1740400	1809900	1846500	1769900	1905800	1827100	2218000	1607500	1925500				Q4J9I2	1550300	1282700	1379600	1718250	1533200	1682450	0.00856665	pass	pass
Q4J9I4	739890	611620	1199200	897940	850340	746610	750830	769850	750740	749700	1093600	1010600	969370	910130	453540	760150	757890	792490	913760	989930	1002000	874200	1033900	1046200	1240600	964570	1197600	951430	877630	802170	1100200	1005700	899650	863240	1175200	1029700				Q4J9I4	675755	1048570	798475	760340	750220	1052100	0.90089	fail	fail
Q4J9I5	1096600	1055200	1100200	986870	884070	1057200	946750	944910	1143100	1099700	1090400	1060800	1060100	891170	1145200	1110600	926370	1158100	1011100	1259900	1110300	1182500	1101900	1075600	1124400	1307000	1143600	1102400	1019200	1132900	1132300	1254500	983460	919370	1116200	1217000				Q4J9I5	1075900	1043535	970635	945830	1121400	1075600	0.720417	fail	fail
Q4J9I6	164090	200130	169240	162740	141510	170380	139750	121410	191450	159750	184010	191280	221890	180370	150840	239930	150590	192460	198030	208810	215410	202460	164030	171910	186760	204460	164840	154040	179740	181110	168000	155930	244080	215930	203900	184320				Q4J9I6	182110	165990	155945	130580	175600	187645	0.816006	fail	fail
Q4J9I7	331710	471430	852170	689500	800320	908410	1004800	787290	631230	504070	1052500	953770	1280700	1076200	1370400	1301700	947630	1015500	1045300	1032800	799690	866510	868190	791760	1023500	971130	1040900	786130	951340	931930	970020	967020	761180	652880	712690	748690				Q4J9I7	401570	770835	854365	896045	567650	1003135	0.28401	fail	fail
Q4J9I8	5469700	7217700	4525700	5785400	5158900	5975400	4389200	6441600	4029300	5823300	5005800	5539400	5897000	6634600	8982000	10144000	3869400	5442300	6274500	7801600	3839300	5705200	4506100	6001500	5528600	8197400	4890000	5716300	4409400	6109800	5171700	6124800	6407100	6848000	2485700	4006000				Q4J9I8	6343700	5155550	5567150	5415400	4926300	5272600	0.376936	fail	fail
Q4J9I9	118990	89116	68418	87520	85396	0	27757	9800.4	0	11763	0	24252	37911	0	0	0	0	0	0	0	55768	0	0	53677	61605	0	51661	0	0	0	0	0	0	74176	0	0				Q4J9I9	104053	77969	42698	18778.7	5881.5	12126	0.0043433	pass	pass
Q4J9J0	72824	89642	45854	58506	66682	53909	45027	42233	84555	83595	146370	165950	139090	144820	135940	191890	191280	214370	37748	77422	71395	88245	80373	65142	85852	136620	87525	87151	202940	200980	52668	68294	44752	66525	72457	88011				Q4J9J0	81233	52180	60295.5	43630	84075	156160	0.200073	fail	fail
Q4J9J1	509810	513400	665490	717040	717550	860940	579940	672180	422300	454280	634840	703310	662830	543940	852980	686200	479570	664040	590140	721740	637260	715530	748380	736690	587360	704620	675380	592170	575790	627190	801500	921170	703840	704410	567300	781430				Q4J9J1	511605	691265	789245	626060	438290	669075	0.262602	fail	fail
Q4J9J2	1232400	1445300	1266400	1475400	1106900	1372000	1143200	1162000	1137400	1159800	1202500	1451600	1164600	1198900	1966400	1555500	939100	1411200	1115900	1611900	1309000	1541200	1244100	1362200	1333300	1905800	1195800	1260900	1323000	1384000	1572100	1986100	1474200	1658900	1428800	1711400				Q4J9J2	1338850	1370900	1239450	1152600	1148600	1327050	0.187357	fail	fail
Q4J9J3	307780	257760	250190	241760	152160	438630	464460	296570	160670	173960	349410	330150	173740	206070	192320	158710	141570	177960	260370	171390	319560	497530	295860	300250	343890	446550	280860	220200	276370	230950	176100	185050	124010	155160	120350	257880				Q4J9J3	282770	245975	295395	380515	167315	339780	0.734689	fail	fail
Q4J9J4	214290	291810	323210	339390	434110	342400	353960	315460	237610	205490	490400	389690	411020	423540	617540	675010	397880	416900	393520	379200	378820	253550	348290	322430	550670	467350	557040	432540	525920	380600	501230	415460	505170	498970	438070	374010				Q4J9J4	253050	331300	388255	334710	221550	440045	0.881353	fail	fail
Q4J9J5	439810	606810	539820	645750	666310	714810	618480	674760	465310	480050	634340	804050	698490	602950	721280	820490	492300	733080	664980	924920	472700	796680	552560	661080	964700	1199800	884260	866120	703460	845590	800080	955600	590330	926170	764560	1113700				Q4J9J5	523310	592785	690560	646620	472680	719195	0.87477	fail	fail
Q4J9J6	325710	305970	745550	646230	554480	548160	557920	493780	774130	542230	851090	782830	707240	473770	395200	282300	836230	706990	523400	363140	795800	589570	755080	636190	517570	286900	706070	406730	1003100	924540	916240	755420	250090	234020	902360	704490				Q4J9J6	315840	695890	551320	525850	658180	816960	0.153911	fail	fail
Q4J9J7	224760	198780	184350	184820	180990	247490	277470	253330	177300	217570	220460	234360	282190	246030	272850	289070	210510	236590	259720	222710	283650	249310	247690	224540	326160	315630	285680	237860	203210	241990	235580	267500	291110	224830	257280	246310				Q4J9J7	211770	184585	214240	265400	197435	227410	0.165979	fail	fail
Q4J9J9	56276	40008	34643	42996	31932	62534	22555	53529	45039	0	103400	162260	127800	154910	244960	244360	98450	185080	32444	69295	20463	46927	12277	43764	41827	0	0	83208	157920	215000	41916	51549	0	0	0	44091				Q4J9J9	48142	38819.5	47233	38042	22519.5	132830	0.442041	fail	fail
Q4J9K1	0	464520	305740	182490	262080	114040	289840	257990	186620	181350	254270	118570	348080	262700	364470	484690	371610	182580	554590	445780	0	200130	469180	154060	535780	440050	528380	428050	60842	76158	265180	256360	469870	779740	439500	136270				Q4J9K1	232260	244115	188060	273915	183985	186420	0.926368	fail	fail
Q4J9K2	0	0	0	0	68307	115320	0	0	0	147930	0	101310	0	0	0	137470	0	117930	0	0	0	133790	0	114640	0	0	0	128390	0	108350	59350	100030	0	0	0	186430				Q4J9K2	0	0	91813.5	0	73965	50655	0.752485	fail	fail
Q4J9K4	0	0	0	0	0	0	0	0	0	0	0	0	0	0	0	0	0	0	0	0	0	0	0	0	0	0	0	0	0	0	0	0	0	0	0	0				Q4J9K4	0	0	0	0	0	0	#DIV/0!	#DIV/0!	#DIV/0!
Q4J9K5	0	0	0	0	0	0	0	0	0	0	0	0	0	0	0	0	0	23222	0	0	0	0	0	0	0	0	0	0	41480	67275	0	0	0	0	0	0				Q4J9K5	0	0	0	0	0	0	#DIV/0!	#DIV/0!	#DIV/0!
Q4J9K6	0	0	0	0	0	10980	0	0	11100	0	56390	103190	50413	59763	50462	0	97459	130150	10243	0	45831	71148	16624	38798	0	0	0	0	97583	91790	0	0	0	0	0	0				Q4J9K6	0	0	5490	0	5550	79790	0.159424	fail	fail
Q4J9L2	131390	162100	163400	161950	113400	135530	74273	91997	107220	81792	165350	179480	264550	187640	245350	295910	186000	201440	292080	420230	255340	222180	255010	244730	169230	173230	178010	131750	166930	192160	196970	211670	170360	199560	154560	130280				Q4J9L2	146745	162675	124465	83135	94506	172415	0.196276	fail	fail
Q4J9L3	124910	136970	212390	154030	142460	138270	48621	85948	130250	128310	182560	196850	148240	204020	380470	348250	144710	194150	150050	316600	141510	226540	41581	219150	174030	272900	129370	183460	206730	223150	239020	296310	137520	275260	77899	222910				Q4J9L3	130940	183210	140365	67284.5	129280	189705	0.406527	fail	fail
Q4J9L4	267590	295520	111630	89501	89599	74639	104590	90218	138130	85058	43077	58781	41263	6692.9	65192	43176	36821	16771	59432	50362	62296	52941	78703	71114	30097	68642	45715	45300	63727	39801	63256	54927	0	117420	93707	66770				Q4J9L4	281555	100566	82119	97404	111594	50929	0.142761	fail	fail
Q4J9L5	211360	265890	759090	884600	195260	285940	201260	180720	167650	196390	926850	1041800	1081800	1003600	1555700	1879700	933610	1141300	774600	860380	771710	1010400	793210	974880	1233200	1301800	1170500	1067400	940680	1055700	1039400	1072200	981120	1288100	1028200	1020600				Q4J9L5	238625	821845	240600	190990	182020	984325	0.930559	fail	fail
Q4J9L6	64167	77824	153680	216900	192370	218170	79378	141260	93526	99113	210780	329770	243470	155420	380250	490130	230170	341440	198620	347710	275620	346200	180620	341710	133390	342170	98443	142920	344510	296550	159200	203170	193690	267860	176280	284150				Q4J9L6	70995.5	185290	205270	110319	96319.5	270275	0.917571	fail	fail
Q4J9L7	216720	179170	73016	115530	580390	593670	1531300	1505000	585280	560940	1104900	1011600	1273600	1230800	1025300	1050200	883520	1078400	113950	155610	94640	123230	51228	106440	407860	453450	645270	591980	1110400	1009400	106390	136080	34449	106120	81664	109530				Q4J9L7	197945	94273	587030	1518150	573110	1058250	0.00330789	pass	pass
Q4J9L8	13550000	10523000	10721000	14761000	4231700	3534400	1762000	2184700	3884700	2557800	24886000	23299000	7911900	7672700	6518300	8246600	38659000	25570000	19010000	10682000	16324000	14200000	18279000	12491000	10998000	5855800	16835000	5699200	31077000	29579000	19183000	16276000	12835000	9195900	21671000	17466000				Q4J9L8	12036500	12741000	3883050	1973350	3221250	24092500	0.967058	fail	fail
Q4J9L9	0	0	0	0	0	0	0	0	0	0	0	0	0	0	0	0	0	0	0	0	0	0	0	0	0	0	0	0	0	0	0	0	0	0	0	0				Q4J9L9	0	0	0	0	0	0	#DIV/0!	#DIV/0!	#DIV/0!
Q4J9M1	225290	157040	867030	870120	199700	188160	197710	165340	208470	212950	936940	824030	969970	747180	850670	661580	802290	979840	871530	814290	1042600	1109000	1072900	922700	1170200	966130	1057400	801360	1078000	1034600	1115100	1075800	779280	467250	1243500	1227400				Q4J9M1	191165	868575	193930	181525	210710	880485	0.975737	fail	fail
Q4J9M3	910740	870240	5049800	5203600	517470	648100	593250	523030	605400	551960	4593800	5239000	5368300	4901700	5875200	5697100	4028400	5354500	5444100	5386700	5030300	5318500	5250900	5521800	6177900	6047300	6114000	5024600	4743000	4976900	6326400	6280300	5175000	5631400	5858600	5730700				Q4J9M3	890490	5126700	582785	558140	578680	4916400	0.891852	fail	fail
Q4J9M4	0	0	24759	27976	0	39117	19095	0	10554	13518	36692	48758	0	0	0	0	49502	48111	0	0	54350	30342	0	46765	0	0	40148	0	65135	35575	42510	34877	0	0	37388	36699				Q4J9M4	0	26367.5	19558.5	9547.5	12036	42725	0.562844	fail	fail
Q4J9M5	70633	107830	181810	210920	140510	121560	178180	175040	163900	140990	228780	217770	322590	265320	246370	321160	201010	203200	309200	290300	217270	180470	284850	245550	252620	249320	256160	222980	193330	168620	187510	219450	258850	196890	233700	190890				Q4J9M5	89231.5	196365	131035	176610	152445	223275	0.0983039	fail	fail
Q4J9M6	474270	497020	1401400	1272700	720590	808790	789600	717340	404280	381730	1515900	1247600	1880200	1884100	2636600	2730500	1522800	1471900	2170500	2121100	1272300	1344100	1229900	1279900	1936100	1855600	2428900	1900700	1582300	1603800	1673300	1520500	2458700	2399100	1283800	1289800				Q4J9M6	485645	1337050	764690	753470	393005	1381750	0.937533	fail	fail
Q4J9M7	191050	170350	707700	733190	411810	416950	420520	395210	250340	207820	826900	847050	875150	749240	844480	780130	713000	798260	677610	729830	731770	738310	818180	793790	721270	780810	824290	726370	792590	793470	805240	774290	594430	696470	695620	661560				Q4J9M7	180700	720445	414380	407865	229080	836975	0.734116	fail	fail
Q4J9M8	1017300	957320	1138700	1218400	844290	1072100	861840	793740	673840	712680	1074400	1040800	1467200	1243200	1151700	1243000	1158800	1357600	1373800	1424100	1379700	1450300	1528800	1572700	1240100	1083700	1352500	1227800	1169500	960350	1472400	1332500	1209200	1022000	1183100	1252900				Q4J9M8	987310	1178550	958195	827790	693260	1057600	0.0634461	fail	fail
Q4J9M9	500340	387970	572910	575750	375790	552480	316910	317050	420110	350690	643320	531100	620510	422250	674140	646930	443020	508740	564860	492010	553610	503720	594790	481200	618220	558550	588540	426730	553870	497640	596990	494990	640690	321040	591310	508910				Q4J9M9	444155	574330	464135	316980	385400	587210	0.350064	fail	fail
Q4J9N0	146670	129590	231280	153270	153880	147300	210330	143920	130830	97255	210140	170750	136500	135980	169050	183530	133100	116920	174400	131530	191850	122430	219490	157240	204530	109440	224180	149020	142920	98940	139420	123580	375450	246050	161230	148910				Q4J9N0	138130	192275	150590	177125	114042	190445	0.993197	fail	fail
Q4J9N2	1074000	881770	1103700	1008300	982040	1042500	915870	962780	687150	840770	1009900	1089900	1218600	1127000	1325800	824090	812460	802290	1203800	1151600	1184700	1170900	1276300	1269200	839420	1074100	874060	705680	1101300	1000700	781990	976320	1011600	903160	712000	634710				Q4J9N2	977885	1056000	1012270	939325	763960	1049900	0.169123	fail	fail
Q4J9N3	0	0	0	0	36627	71448	0	27250	0	0	0	33660	0	0	0	0	0	57214	0	0	0	15981	0	0	0	0	0	0	27926	63468	0	0	0	0	17331	0				Q4J9N3	0	0	54037.5	13625	0	16830	0.582915	fail	fail
Q4J9N4	0	0	0	0	0	0	0	0	0	0	0	0	0	0	0	0	0	0	0	0	0	0	0	0	0	0	0	0	0	0	0	0	0	0	0	0				Q4J9N4	0	0	0	0	0	0	#DIV/0!	#DIV/0!	#DIV/0!
Q4J9N6	41349	55982	58034	71633	69823	77808	123000	87025	64076	57037	137290	131880	83375	75206	154250	155010	110150	126700	71826	78062	101560	61171	86809	61094	65479	100970	73300	75073	92849	95464	83504	41290	35246	0	44836	52405				Q4J9N6	48665.5	64833.5	73815.5	105012	60556.5	134585	0.0347758	fail	pass
Q4J9N7	73466	117780	107830	111430	99241	70577	48167	63934	73686	103650	240540	260680	183750	196640	158850	122070	186560	267050	139850	55653	119790	110060	126610	104030	175540	125770	87746	117090	152350	244590	113740	103720	51182	57273	67883	93327				Q4J9N7	95623	109630	84909	56050.5	88668	250610	0.392779	fail	fail
Q4J9N9	2313100	2022400	1547000	1020900	778910	283370	1140700	1005500	1011100	838310	1440200	0	2226200	1649700	2512100	2304600	1204900	565950	2477300	2315000	1070700	604160	1588300	870840	2993600	2443700	826120	633180	1009400	575510	0	377000	3270600	3110400	1432600	905630				Q4J9N9	2167750	1283950	531140	1073100	924705	720100	0.284716	fail	fail
Q4J9P1	2299800	2298000	2307700	2031100	1889400	2066900	2024100	1996100	2245000	1831000	2042900	2036300	2224100	1969800	2372300	2408400	1522300	1681200	2155000	2300800	2243500	2212400	2088600	2110500	2494100	2704700	2499700	1923800	1876200	1730200	2437000	2308800	2609700	2333000	2467100	2450300				Q4J9P1	2298900	2169400	1978150	2010100	2038000	2039600	0.215525	fail	fail
Q4J9P4	114490	220700	131530	94922	69361	99752	143650	93113	122770	99320	128960	140580	193140	75668	201890	109500	143890	120800	168430	180250	162290	143930	143340	106190	184390	215130	194490	169650	140490	156590	147550	134430	228340	165660	124310	182980				Q4J9P4	167595	113226	84556.5	118382	111045	134770	0.986775	fail	fail
Q4J9P5	249320	311760	808830	802710	637090	629740	601080	648230	281340	322150	1020300	971550	945970	835160	888700	1048900	946660	1024600	936670	935060	820170	956740	808450	875880	808020	934510	879730	815200	1009400	983660	963430	1001200	795830	903550	740150	791500				Q4J9P5	280540	805770	633415	624655	301745	995925	0.683153	fail	fail
Q4J9P6	0	193460	72527	147890	38666	44985	26293	74955	36682	107790	0	59496	0	161810	221170	266100	73537	0	0	227340	41752	68539	27741	106770	96542	223560	93379	149370	55871	0	53996	174200	77788	196080	0	111820				Q4J9P6	96730	110208	41825.5	50624	72236	29748	0.364233	fail	fail
Q4J9P7	0	0	86858	89546	84898	82907	121340	94644	59957	53017	105180	110170	0	26145	0	0	70999	113650	0	0	71721	81627	0	65977	47081	0	52841	37003	107910	116770	53705	48091	0	0	95827	103670				Q4J9P7	0	88202	83902.5	107992	56487	107675	0.151087	fail	fail
Q4J9P8	166140	84308	0	0	0	0	0	0	0	0	0	0	0	48167	0	0	0	0	0	23445	0	10943	0	0	0	56538	0	0	62413	0	0	0	0	0	0	0				Q4J9P8	125224	0	0	0	0	0	0.172852	fail	fail
Q4J9P9	97571	0	42230	56444	57546	53585	52691	47427	66858	64165	45258	63751	41265	53932	54016	0	149800	89250	64037	0	52286	57451	77630	47953	63222	103110	42944	51457	111390	89565	38335	31127	212670	85007	89014	69701				Q4J9P9	48785.5	49337	55565.5	50059	65511.5	54504.5	0.691603	fail	fail
Q4J9Q0	1222700	1341000	1032400	1001500	1058800	1102000	853990	852370	1349300	1262900	1412800	1433700	1732400	1408700	1761000	1781000	1535500	1674000	1300900	1334900	1295000	1338600	1358300	1413400	1585400	1587800	1637300	1207900	1857000	1540800	1520900	1331900	1392800	1392700	1733900	1608800				Q4J9Q0	1281850	1016950	1080400	853180	1306100	1423250	0.592733	fail	fail
Q4J9Q1	0	0	0	0	0	0	0	0	0	0	0	0	0	0	0	0	0	0	34480	0	0	0	0	0	0	0	0	0	0	0	0	0	104040	151780	0	0				Q4J9Q1	0	0	0	0	0	0	#DIV/0!	#DIV/0!	#DIV/0!
Q4J9Q2	0	0	11723	0	33549	0	57228	41407	23810	0	64893	45776	47167	38212	0	0	70770	0	0	0	0	21609	0	0	0	19403	0	8341.4	0	60079	28390	18392	0	0	23467	0				Q4J9Q2	0	5861.5	16774.5	49317.5	11905	55334.5	0.0185173	fail	pass
Q4J9Q3	28702000	23234000	22827000	21765000	25565000	28791000	20292000	16169000	17004000	13673000	22250000	23346000	22432000	17820000	23546000	21544000	17025000	18661000	28940000	26020000	24723000	23682000	20481000	20619000	21083000	19265000	22675000	17327000	21159000	20535000	20423000	22148000	24853000	18151000	20020000	19805000				Q4J9Q3	25968000	22296000	27178000	18230500	15338500	22798000	0.00935222	pass	pass
Q4J9Q5	6815000	6598500	4010100	4224700	3474500	3751500	4437600	4316500	4003900	3901900	3076500	2763000	3785300	3550900	5007300	5817500	3044700	3097800	4743400	4486600	3041200	3378500	3587300	3798900	4401600	4789700	5229200	3798200	2622900	2704900	3250800	3085800	6638200	6569700	3562900	3725300				Q4J9Q5	6706750	4117400	3613000	4377050	3952900	2919750	0.143163	fail	fail
Q4J9Q6	5274300	5334400	5713100	6942300	5838200	6974400	6224700	6340000	3673100	4216100	6132400	6601300	6945200	6279800	9175700	9459600	5025100	5978500	7641500	8446600	6470000	6850700	6835400	7039000	7742400	8657500	6849500	6536200	5151800	5653100	6698500	7299500	7488300	7725200	6804600	6877100				Q4J9Q6	5304350	6327700	6406300	6282350	3944600	6366850	0.439632	fail	fail
Q4J9Q7	1452600	1384200	1422200	1506600	1698100	1751600	2302500	1877500	1104900	1036700	1392000	1450900	1574000	1446700	1802400	1582400	1166800	1302100	1667100	1669600	1448900	1510200	1460600	1469600	1827400	1823300	1844900	1502900	1217500	1211600	1495800	1598300	1877300	1740400	1624800	1536900				Q4J9Q7	1418400	1464400	1724850	2090000	1070800	1421450	0.968154	fail	fail
Q4J9Q8	255240	236070	302230	329300	233360	340500	347610	294670	266970	267570	321390	365980	321850	269970	348390	384290	247800	310830	341430	314530	342910	379720	365830	327430	442380	494470	340950	327570	256700	336030	399890	419230	284580	358180	375880	364870				Q4J9Q8	245655	315765	286930	321140	267270	343685	0.30293	fail	fail
Q4J9Q9	898300	841520	852800	965960	877100	787920	1029600	954300	838940	854460	960280	762580	942920	710680	1368100	1235000	723870	697730	951080	1039200	607390	746170	800470	823430	1032100	1008500	959510	831610	668980	561870	913170	720650	966310	1404400	768340	841110				Q4J9Q9	869910	909380	832510	991950	846700	861430	0.544368	fail	fail
Q4J9R0	146970	202060	147500	119030	221810	96008	114540	215690	239300	147540	223770	140270	154400	78930	106710	0	159200	170240	95975	47342	154960	164470	117120	97691	54418	71437	0	26966	190010	158880	132080	139050	167360	275020	177340	134870				Q4J9R0	174515	133265	158909	165115	193420	182020	0.415402	fail	fail
Q4J9R1	728700	615560	687580	700700	603360	686310	767800	662360	444050	498820	632400	683420	651670	608490	685390	849970	390190	440500	689860	653140	576440	668950	793640	766160	828940	902890	745930	655170	580050	543290	627790	675370	792680	701640	697850	746380				Q4J9R1	672130	694140	644835	715080	471435	657910	0.322946	fail	fail
Q4J9R2	1979000	2192800	2362300	2528500	2988300	3573800	3351500	3632500	2106400	2000400	2434400	2431500	2847600	2310700	3182600	3342500	2364200	2535200	3166200	3332000	2649700	2605500	2979800	2850000	2524600	3215000	2535900	2249400	2261600	2269300	2948700	2970800	2696200	3179000	2630800	2702700				Q4J9R2	2085900	2445400	3281050	3492000	2053400	2432950	0.882283	fail	fail
Q4J9R3	977940	900280	1075500	1247300	1731300	1773300	1604400	1628300	954690	964670	1380900	1537300	879530	990230	1444600	1015300	1084900	1531100	943350	1200600	1354800	1463800	1218200	1167500	1212500	1145200	935770	867930	1365400	1300300	1106000	1258400	856640	1199800	1321200	1475500				Q4J9R3	939110	1161400	1752300	1616350	959680	1459100	0.768207	fail	fail
Q4J9R4	6122500	5917000	4398600	4135300	7087500	8444000	7561300	6141800	4686000	4341900	4594600	4246600	5301600	4787600	6508000	7091600	4052600	4399300	6643900	6531800	4857800	4828300	5053400	4129700	4766400	4837700	5093900	3798400	3665000	3842900	4373500	4299800	5832400	6286200	4714900	4196000				Q4J9R4	6019750	4266950	7765750	6851550	4513950	4420600	0.397699	fail	fail
Q4J9R5	1319500	995780	1184100	1049900	1486100	1090500	1876700	1595600	859150	703000	1174800	829440	1290500	1068200	1096900	1206000	819560	699570	1566100	1091200	854160	772500	1144800	1100900	1701500	1450800	1544000	1116700	767730	640340	689920	548130	1557900	1271400	1091100	773630				Q4J9R5	1157640	1117000	1288300	1736150	781075	1002120	0.945363	fail	fail
Q4J9R6	290050	257240	479130	487060	1060500	1166600	1044000	885790	237290	295570	383510	402790	325800	264140	275290	348990	270450	338800	459430	478190	448820	412170	490760	457090	540770	519110	530920	377050	405960	467180	471600	419280	300040	369570	535060	522570				Q4J9R6	273645	483095	1113550	964895	266430	393150	0.706258	fail	fail
Q4J9R7	79571	89082	179220	159690	387570	349440	438280	401780	149190	138800	274780	233680	316520	248640	224010	248880	270640	239440	220050	178200	207280	169330	208550	165540	207600	163690	210990	187650	257470	193970	239990	197950	145920	109670	221670	166670				Q4J9R7	84326.5	169455	368505	420030	143995	254230	0.398867	fail	fail
Q4J9R8	519550	648270	746000	686340	716280	851000	818250	541370	634700	562190	713200	764950	733400	518210	484200	838640	486870	561750	789340	757200	730490	735220	660240	611850	686470	625350	796530	496910	686930	559530	797430	741280	423010	546400	926740	774040				Q4J9R8	583910	716170	783640	679810	598445	739075	0.736454	fail	fail
Q4J9R9	3741400	3215400	5999900	5637500	4135100	4742000	5018600	4424400	4629100	4642200	5676800	5552800	4387500	3207100	3728700	3864900	4525600	4702500	4359000	3900500	5851300	5078500	5304900	4644400	4351100	3067400	4402100	3293900	4913800	4879700	5239000	4682100	2864500	2533800	5434500	4829300				Q4J9R9	3478400	5818700	4438550	4721500	4635650	5614800	0.422514	fail	fail
Q4J9S0	820840	755660	1430300	1330500	2345400	2521900	2331300	2314600	827400	612920	1354000	1387500	1196100	748300	2064100	1911300	1361600	1405200	1479200	1326100	1164100	1122900	1349900	1304100	1244900	1135500	1268000	961360	1420500	1395700	689070	659700	1465600	1671100	956650	1046800				Q4J9S0	788250	1380400	2433650	2322950	720160	1370750	0.885495	fail	fail
Q4J9S1	45874	69780	125840	110610	107490	241930	100200	86598	74639	55635	140260	147230	140640	87528	107990	86509	98306	171970	169530	142590	143160	116650	112690	146690	171530	125130	141120	102120	84954	109900	137640	79580	0	137630	161370	105540				Q4J9S1	57827	118225	174710	93399	65137	143745	0.618942	fail	fail
Q4J9S2	339720	304960	237570	299080	257180	356590	269200	315470	179750	218020	252750	398570	278120	326530	771420	784720	211690	355640	370620	442010	255440	390020	240270	370080	351170	379060	315780	284040	216400	359280	212590	238190	447840	543460	207720	222440				Q4J9S2	322340	268325	306885	292335	198885	325660	0.479701	fail	fail
Q4J9S3	163080	157060	380340	311410	548280	574440	659150	502850	298060	243750	517450	474110	407970	314290	390150	382920	359980	445270	388790	368630	390820	361440	425320	359000	345070	321290	398260	302390	417710	375760	399810	411880	266650	250760	381700	340830				Q4J9S3	160070	345875	561360	581000	270905	495780	0.357265	fail	fail
Q4J9S4	1032200	1065800	1297800	1350500	1339300	1523700	1445500	1325800	726010	719940	1305800	1240100	1393300	1401000	1766700	1941800	959940	1091100	1598600	1969100	1071800	1140100	1093000	1230800	1427800	1523400	1224800	1322700	924830	1005000	1277200	1319200	1540200	1823100	940030	1230900				Q4J9S4	1049000	1324150	1431500	1385650	722975	1272950	0.373285	fail	fail
Q4J9S5	1408800	1431000	2379200	2332200	2155400	2558800	2215000	1966500	1630200	1440900	2619900	2475300	2778600	2204900	2574100	2904000	2252300	2533000	2703100	2709600	2605600	2684000	2579500	2450100	2820900	2306300	2822800	2464500	2556300	2603200	2871400	3039100	2500300	2331600	2751700	2435000				Q4J9S5	1419900	2355700	2357100	2090750	1535550	2547600	0.96174	fail	fail
Q4J9S8	2258700	2339500	1274600	1272600	1262100	1422200	1362300	1086700	1905500	1678100	969490	947150	1471300	1208900	1077200	1179100	881010	957850	1463400	1617200	1683800	1654700	1505600	1170800	2097600	2101300	1841800	1627100	1452000	1317200	1509400	1461200	1726000	1157600	2452600	1932900				Q4J9S8	2299100	1273600	1342150	1224500	1791800	958320	0.265678	fail	fail
Q4J9S9	26424	0	45905	37871	31131	45512	16861	32548	40947	27771	50415	72749	78329	54870	53905	55019	66971	62199	37456	22204	57701	76549	39662	47186	57469	46587	49249	41938	71568	78618	50795	48297	21624	43637	49661	54502				Q4J9S9	13212	41888	38321.5	24704.5	34359	61582	0.412861	fail	fail
Q4J9T0	824700	898960	547780	602220	712560	877030	821300	711050	646710	624410	517000	608820	657020	583610	595210	742860	352760	457380	696170	716750	612910	567930	657500	619070	474540	450400	541740	452860	420410	466560	581830	685030	506770	311560	415440	418320				Q4J9T0	861830	575000	794795	766175	635560	562910	0.252061	fail	fail
Q4J9T2	89392	69680	224340	235530	224990	262950	270370	171870	171910	165950	399920	258430	232550	230510	196610	226950	274540	216510	197060	260730	240990	245710	227560	278140	195640	225140	234270	194960	254010	192730	262860	293170	204280	188660	264270	252140				Q4J9T2	79536	229935	243970	221120	168930	329175	0.2974	fail	fail
Q4J9T3	0	250750	184400	221820	151010	148950	194870	147840	162340	237650	181630	184580	274260	289340	34590	0	177210	161340	294730	319070	230000	212650	252180	243450	325160	285340	247070	215440	178880	143630	280480	281810	138990	164610	216560	187020				Q4J9T3	125375	203110	149980	171355	199995	183105	0.519694	fail	fail
Q4J9T6	591520	582550	645850	635820	600070	572950	115390	121390	336260	333230	148650	153820	145370	98468	178980	140290	123840	126810	572300	257670	679080	562540	475620	426770	353340	286310	290970	224650	232690	181050	779480	566740	343180	411280	414830	339990				Q4J9T6	587035	640835	586510	118390	334745	151235	3.69856e-06	pass	pass
Q4J9T7	277550	378120	236990	287000	229810	226680	106860	168510	228700	228320	250050	244240	338430	292000	457190	431480	251200	281690	366850	471390	274660	281610	254930	316290	386880	456500	292850	295060	270510	229250	371850	392720	428780	399090	278940	341910				Q4J9T7	327835	261995	228245	137685	228510	247145	0.0639024	fail	fail
Q4J9T9	1812900	1581900	1292800	1357400	1260600	1425400	1441200	1265200	1524000	1244200	1353400	1321400	1719900	1431000	1570300	1486400	1176200	1303800	1658000	1728300	1476200	1495700	1627700	1432600	1814400	1896100	1744200	1342800	1227100	1210800	1629400	1556000	1957700	1375500	1570600	1439600				Q4J9T9	1697400	1325100	1343000	1353200	1384100	1337400	0.336118	fail	fail
Q4J9U0	906450	1016800	891420	625560	561310	588330	1198200	740960	905620	831090	983410	735950	614240	749260	998080	1021000	398190	536000	658520	443070	630100	857270	671100	627670	988160	896420	565450	362400	705000	1929000	278650	430400	1220200	628960	623210	907000				Q4J9U0	961625	758490	574820	969580	868355	859680	0.238797	fail	fail
Q4J9U1	58484	61706	205980	239780	224360	277070	257650	244820	128530	135790	330990	334050	319930	265890	257740	238400	271480	347050	222840	250940	256810	254880	243060	231010	247000	261390	310930	267380	375140	352570	295970	302510	222780	127230	228910	206960				Q4J9U1	60095	222880	250715	251235	132160	332520	0.280685	fail	fail
Q4J9U3	5956500	5758300	5516000	5605700	5379700	5645500	5797000	5156900	4983500	4227500	5577000	5392800	6998800	5374000	8149000	7475400	5917200	6133100	7046700	7789900	6706800	6708300	6992900	6709200	7719100	7619500	7107500	5556900	5808600	5799600	7084900	7550300	7712700	7453900	6481700	6853400				Q4J9U3	5857400	5560850	5512600	5476950	4605500	5484900	0.0875127	fail	fail
Q4J9U4	281140	217300	314510	294180	310890	419790	272820	251060	242740	321230	317520	419110	355790	319230	446390	530550	301320	299240	357900	325550	343170	359990	413200	397470	440810	469250	380440	345200	305360	356780	402600	413950	378550	343390	431140	442910				Q4J9U4	249220	304345	365340	261940	281985	368315	0.954323	fail	fail
Q4J9U5	5410600	5401900	3789500	3902500	3652200	3466100	3653700	3210500	3276700	3188000	4062800	2936200	6015100	4495200	7014200	6362400	4067900	3047100	7227400	5953500	4251700	3683300	4365200	4153000	5489600	5500700	4935600	3820400	3436300	3167200	5101700	5055900	7350600	6887400	3903900	3587200				Q4J9U5	5406250	3846000	3559150	3432100	3232350	3499500	0.051691	fail	fail
Q4J9U6	162720	193540	177120	171550	205070	191060	166900	146540	163310	139780	205370	300040	193510	184130	320140	331380	229030	152790	201600	194680	199220	284300	131700	128950	184600	243860	208070	179510	261030	179500	255140	206980	172250	173650	206990	190880				Q4J9U6	178130	174335	198065	156720	151545	252705	0.893281	fail	fail
Q4J9U8	14551000	13648000	9743300	8878000	7057900	6120600	10660000	8088400	8060100	6830200	8828600	5090300	12296000	10484000	13577000	12283000	7654900	5885700	14270000	14012000	8971600	7228200	12184000	10297000	10232000	9718700	10165000	7851600	7224200	4938600	10788000	9636400	14466000	12791000	7672900	5867200				Q4J9U8	14099500	9310650	6589250	9374200	7445150	6959450	0.223614	fail	fail
Q4J9V0	0	0	0	0	0	0	0	0	0	0	0	0	0	0	0	0	0	0	0	0	0	0	0	0	0	0	0	0	0	0	0	0	0	0	0	0				Q4J9V0	0	0	0	0	0	0	#DIV/0!	#DIV/0!	#DIV/0!
Q4J9V1	153270	207070	286610	294870	226360	303120	242100	217050	157940	145180	334700	317080	437940	412440	530420	527320	309930	347140	514010	509770	376070	395040	361100	350460	471980	496700	410060	385140	330270	310200	376880	470630	383330	347430	373840	353940				Q4J9V1	180170	290740	264740	229575	151560	325890	0.81785	fail	fail
Q4J9V2	1936700	1411200	2310400	2521400	2526800	2609700	2505700	2445200	1529700	1642300	2820700	2862700	2225000	2087900	3017800	2942400	2134700	2445400	2666100	3048800	2672000	2730800	2606900	2828000	2575800	2674600	2132100	2077100	2399400	2256800	2742700	2927400	2849600	2763700	2201500	2306400				Q4J9V2	1673950	2415900	2568250	2475450	1586000	2841700	0.793044	fail	fail
Q4J9V3	6973600	4505200	4820700	4897200	4784900	4531100	4952700	4166700	4305800	4390400	4680300	4268900	5569100	4899400	4998300	6653100	4468800	2668900	6455900	6657100	5590100	4917100	6392600	5272900	8541200	8242000	7266500	5388100	4380200	2844600	6532400	5490200	6914100	8079900	5478600	5943800				Q4J9V3	5739400	4858950	4658000	4559700	4348100	4474600	0.151243	fail	fail
Q4J9V4	1424000	1417200	1549900	1354800	1268400	1327400	1305400	1234300	1441000	1321400	1656900	1630500	1693200	1462400	1821200	1877100	1392000	1531600	1747900	1769700	1546800	1670000	1475100	1518800	1781700	1905000	1723400	1387700	1428600	1391400	1453200	1439000	1868200	1829900	1612100	1551700				Q4J9V4	1420600	1452350	1297900	1269850	1381200	1643700	0.628003	fail	fail
Q4J9V7	0	37753	77095	104390	131210	189780	98902	82680	77820	41655	91824	138850	78106	56677	40333	26040	31146	65560	106760	118150	110900	130130	77785	99128	0	58265	63002	69141	118060	125910	118810	157100	44059	0	111810	114710				Q4J9V7	18876.5	90742.5	160495	90791	59737.5	115337	0.963846	fail	fail
Q4J9V9	236270	260810	318990	347180	254870	353140	367670	377150	152900	175890	365570	416730	229260	269290	373850	488320	209260	333900	270960	412910	323000	333250	246870	321660	370940	508550	300940	316350	299060	343080	227600	250780	445990	561790	264010	411580				Q4J9V9	248540	333085	304005	372410	164395	391150	0.787502	fail	fail
Q4J9W0	4296500	5624900	3575600	3832400	4059600	5146100	3254000	3100700	3385900	3177100	3630200	4640700	4119500	3811600	5446500	5911400	3347900	3788900	4160200	5146400	3535300	4153600	3915800	4297400	3500900	3952700	3772000	3342200	3420500	3528700	3963800	4627800	5330600	6272000	3304900	4478000				Q4J9W0	4960700	3704000	4602850	3177350	3281500	4135450	0.0506642	fail	fail
Q4J9W3	0	0	0	0	0	0	0	0	0	0	0	0	0	0	0	0	0	0	0	0	0	0	0	0	0	0	0	0	0	0	0	0	0	0	0	0				Q4J9W3	0	0	0	0	0	0	#DIV/0!	#DIV/0!	#DIV/0!
Q4J9W4	60623	13873	163920	167860	228790	255040	220490	217750	89653	81862	260820	295020	321360	267020	249560	237730	243450	240090	197350	209220	209960	192920	203730	188020	218960	214080	217670	149460	312950	304540	249090	224480	47654	112420	163440	156090				Q4J9W4	37248	165890	241915	219120	85757.5	277920	0.404963	fail	fail
Q4J9W7	736910	804890	1253400	1255000	1855000	1265700	1875700	1501400	1218800	984540	1403500	1367000	972630	1047500	1169500	524470	1614200	1474200	1171400	1068500	1358800	1470600	1670800	1449200	1253700	1198000	1110200	910590	1320500	1209600	1491100	1339700	692630	998840	1484900	1110800				Q4J9W7	770900	1254200	1560350	1688550	1101670	1385250	0.358451	fail	fail
Q4J9W8	0	193870	376080	423000	317540	365300	305400	248800	212310	153430	449880	459480	375770	221150	0	1028000	324180	392960	406060	352530	452370	511750	494230	423940	290120	104890	349580	308680	444290	506570	381360	350940	0	0	426190	425750				Q4J9W8	96935	399540	341420	277100	182870	454680	0.762595	fail	fail
Q4J9W9	403440	275990	0	78446	82537	0	0	62586	0	0	147740	39141	212130	181130	0	249640	113470	0	469550	244180	0	19087	0	0	0	0	278400	139510	0	17796	157180	0	553410	471750	0	37753				Q4J9W9	339715	39223	41268.5	31293	0	93440.5	0.195327	fail	fail
Q4J9X0	117470	0	119670	118350	0	69668	159010	68544	0	60296	103000	105700	65204	48181	109230	214980	0	81342	48057	0	0	0	93859	139410	71525	0	0	0	0	0	139930	112510	0	0	0	0				Q4J9X0	58735	119010	34834	113777	30148	104350	0.719676	fail	fail
Q4J9X1	0	0	0	0	0	0	0	0	0	0	0	0	0	0	0	0	0	0	0	0	0	0	0	0	0	0	0	0	0	0	0	0	0	0	0	0				Q4J9X1	0	0	0	0	0	0	#DIV/0!	#DIV/0!	#DIV/0!
Q4J9X2	63844	33184	159340	151200	182810	183830	193530	175450	170610	106370	277160	238740	187310	86631	133880	86652	309460	280420	135630	36193	275380	223350	209480	111220	87282	26761	170430	136040	254060	249910	191720	161320	67493	23895	229370	165710				Q4J9X2	48514	155270	183320	184490	138490	257950	0.100415	fail	fail
Q4J9X3	0	0	0	0	0	0	0	0	0	0	0	0	0	0	0	0	0	0	0	0	0	0	0	0	0	0	0	0	0	0	0	0	0	0	0	0				Q4J9X3	0	0	0	0	0	0	#DIV/0!	#DIV/0!	#DIV/0!
Q4J9X4	125660	176660	336420	366290	295450	363330	270830	278850	163740	162700	324980	349460	382120	345780	474520	463750	384000	485500	432710	432760	460450	481580	483340	469360	493080	456560	425820	386210	364950	366200	458600	482720	329280	262850	464480	445100				Q4J9X4	151160	351355	329390	274840	163220	337220	0.728238	fail	fail
Q4J9X6	155010	138550	108440	102190	85067	84173	106290	107910	83522	65700	112680	115350	123310	79424	143110	107630	76038	86387	139580	142590	136350	105320	110510	102160	178450	172120	200000	126180	113860	126510	128650	121420	69784	135370	172700	141570				Q4J9X6	146780	105315	84620	107100	74611	114015	0.360473	fail	fail
Q4J9X7	1352900	1878700	467000	718190	11556	988620	713480	728920	933950	929430	678420	422750	1096600	865080	1298600	1428800	519710	515740	1056000	956620	713800	707440	792020	835880	1244900	1115800	903370	1068100	512040	567570	0	895370	1641400	1256600	1546200	537550				Q4J9X7	1615800	592595	500088	721200	931690	550585	0.561678	fail	fail
Q4J9X8	38493	79772	58207	68078	63945	60353	36486	41055	73278	78041	37903	61257	58708	55418	63891	52435	42621	49292	71085	73855	79396	87381	44872	79817	83563	91785	73821	59607	66017	63145	93969	91712	47725	93541	72926	77480				Q4J9X8	59132.5	63142.5	62149	38770.5	75659.5	49580	0.486261	fail	fail
Q4J9X9	1074100	1023800	721750	647870	829920	795760	793260	772940	682380	687640	683920	571090	676340	613600	969980	762560	582550	559940	816720	705410	607000	563550	701330	576970	1286500	1184500	780950	745980	497640	510090	535550	504580	782930	989330	930420	832830				Q4J9X9	1048950	684810	812840	783100	685010	627505	0.0754991	fail	fail
Q4J9Y1	0	133530	157480	200520	103300	80465	162890	179570	161240	128700	75569	134440	154570	0	164420	0	104930	256460	92454	157340	143030	91795	56115	0	89723	106840	192490	140930	191390	226630	188920	127900	208680	177070	118940	113500				Q4J9Y1	66765	179000	91882.5	171230	144970	105004	0.405309	fail	fail
Q4J9Y2	754740	1141300	1251700	1234200	1645200	1678400	990440	1122700	788150	964890	1278500	1181000	725980	812490	1048600	928970	745270	1270700	1413600	1432600	1110800	1403500	1064700	1255900	728920	1040900	1155300	1249600	1162200	1515000	1122100	1094800	840370	951980	1236500	1367000				Q4J9Y2	948020	1242950	1661800	1056570	876520	1229750	0.174866	fail	fail
Q4J9Y3	764440	875880	566270	596570	357060	389930	365120	345570	510720	477020	538390	474420	647330	600830	837630	958480	437130	427380	744660	879830	591360	586280	623380	605870	803310	971100	724230	603060	540090	481280	787520	770990	783620	903390	644900	647740				Q4J9Y3	820160	581420	373495	355345	493870	506405	0.147503	fail	fail
Q4J9Y4	1744600	1365400	177060	261360	7310700	7339000	8443700	9005400	3883700	10265000	1041000	1056200	2653700	982850	465270	146240	2560900	2039300	577780	188180	1769100	1396400	1974400	738870	236310	137700	122250	36719	106880	16479	0	37861	56637	0	0	0				Q4J9Y4	1555000	219210	7324850	8724550	7074350	1048600	0.264076	fail	fail
Q4J9Y5	5813400	7234700	2862400	3305500	2224100	2590900	2962300	2990600	3061600	3925700	2646800	2900900	3246700	3393400	4344200	4951800	2178500	2636500	3495700	4456900	2673400	3194700	2783200	3367700	4015100	5371600	4415000	3618600	2257000	2691900	3076300	3780700	5446900	4832900	3681100	3913400				Q4J9Y5	6524050	3083950	2407500	2976450	3493650	2773850	0.302058	fail	fail
Q4J9Y7	832950	1163900	669230	549020	496280	271050	990390	753050	626250	746780	518880	497740	690310	472270	1011000	942650	471930	549660	532430	706900	579070	532260	630470	884940	692530	914220	538520	487040	510850	515970	653010	677750	697580	749710	812490	618900				Q4J9Y7	998425	609125	383665	871720	686515	508310	0.867134	fail	fail
Q4J9Y8	6123400	6210700	4182800	4174600	4033700	3457200	5148700	4766000	4234900	4072300	3815300	3236000	4036800	3422300	4616000	5159900	3212600	3129600	4824100	5006100	4003700	3872400	4507300	4206300	5720500	5500500	4125200	3738600	3063700	3035900	3646800	3459700	5346000	5152100	4312600	4421200				Q4J9Y8	6167050	4178700	3745450	4957350	4153600	3525650	0.400684	fail	fail
Q4J9Y9	6234700	6274800	4399200	4523300	4408600	5105900	4782200	4923700	5112100	5127500	3828400	3661200	4866400	4324700	4097300	4789000	3238400	3838000	5398600	5884600	4326500	4290300	4846700	4827300	6219600	6465700	5173300	4398300	3464600	3410200	4756500	4982200	5094800	5349900	5035500	4839800				Q4J9Y9	6254750	4461250	4757250	4852950	5119800	3744800	0.22348	fail	fail
Q4J9Z0	5825900	6061000	5148000	5218100	4380100	5009700	5689100	5116200	5513000	5250800	4714100	4687200	7045900	6170600	6336500	5958500	4609100	5040900	6176400	6650000	6236800	6185400	6112900	6547900	7966100	7941300	6951800	6184400	4864800	4714800	6768700	7046100	5873200	6160100	6843900	7006500				Q4J9Z0	5943450	5183050	4694900	5402650	5381900	4700650	0.713951	fail	fail
Q4J9Z2	2497700	2695100	1929200	1863500	1523600	1813200	1651800	1480600	1719900	1728200	1785600	1513700	2222500	2180000	2665000	3062100	1450300	1678200	2605000	2762200	1811500	1980000	2149400	2146800	2750200	2588500	2294900	1954600	1726100	1741000	2678500	2680600	3112000	3105200	2257600	2409200				Q4J9Z2	2596400	1896350	1668400	1566200	1724050	1649650	0.0570788	fail	fail
Q4J9Z4	3301400	2800000	2790300	2595000	3214000	3922200	3263000	3030600	3518200	3176200	2709000	3282500	2702100	2287300	2596000	3148500	2703600	3521900	2850000	3044000	3216800	3432300	3436600	3339300	2663100	2256700	2202900	2214200	2618200	3046700	2649200	2724800	1830000	3008300	2752800	2704700				Q4J9Z4	3050700	2692650	3568100	3146800	3347200	2995750	0.798699	fail	fail
Q4J9Z5	309560	1432200	227900	579330	349710	209580	704050	876170	681260	225760	767530	638550	690700	178780	729580	580840	747500	638930	555040	895370	567300	546370	557720	394050	241880	711670	686780	39902	377600	474730	495960	436920	470550	0	366980	492440				Q4J9Z5	870880	403615	279645	790110	453510	703040	0.549637	fail	fail
Q4J9Z6	949020	1651100	1570800	1776900	1478500	1903700	1330100	1445900	861810	1095400	1214100	1266700	1184800	1063100	1905200	1776000	936560	1191900	1455000	2161400	1373600	1819100	1380500	1894100	1281600	1583800	1297900	1304700	1089200	1370800	1465700	1656800	1923500	2623500	1233300	1702500				Q4J9Z6	1300060	1673850	1691100	1388000	978605	1240400	0.0511496	fail	fail
Q4J9Z7	906710	999070	1005000	1039000	852170	1085900	952460	963740	802280	1180500	1071800	1140700	1621100	1348400	1915500	1840800	1332400	1527900	1421600	1639700	1398800	1527100	1405800	1285000	1366700	1202700	1105800	1085000	1115600	1334500	1340700	1686300	1139900	1328600	1269400	1241900				Q4J9Z7	952890	1022000	969035	958100	991390	1106250	0.591384	fail	fail
Q4J9Z9	3780200	3461800	2694400	2641900	2233000	2313200	2636700	2203900	2654100	2507900	2470600	2180000	3696900	3121200	4158900	4222000	2535900	2323100	3992100	4011800	3095800	2707300	3591100	3077300	4054800	3889900	3806200	3151000	2823100	2585500	3476700	3223900	4119600	3997100	3426100	2854800				Q4J9Z9	3621000	2668150	2273100	2420300	2581000	2325300	0.158311	fail	fail
Q4JA00	1641300	1967900	776730	874920	345790	495780	455760	784420	656230	1169500	578060	549470	2026500	1901600	1869200	2221300	799110	695380	1476600	1377200	250820	1430700	358310	2151900	1284200	1092900	1604200	1166200	544550	261620	758390	1020300	2171700	1950300	265010	851470				Q4JA00	1804600	825825	420785	620090	912865	563765	0.28887	fail	fail
Q4JA01	2509000	2409200	2850100	3200200	2634300	3252600	3187400	3108200	3442600	3499600	2574700	3062000	3645500	2928500	2401100	2454100	3167000	3314400	2992800	2966600	3869000	4085200	3779200	3753000	3036100	2661000	3163300	2399700	3066700	3490200	3770900	3744500	2142900	2247800	3685600	3601400				Q4JA01	2459100	3025150	2943450	3147800	3471100	2818350	0.120793	fail	fail
Q4JA02	160890	177010	250070	262760	179130	243550	249670	273760	188950	212000	281650	288750	227440	213470	428930	479800	138760	242790	155190	311980	200100	236700	208770	254490	287040	290370	210490	208990	166580	213450	149480	332840	338090	490750	181400	268260				Q4JA02	168950	256415	211340	261715	200475	285200	0.164745	fail	fail
Q4JA03	528880	464770	457720	490420	387580	483750	395170	425340	409790	398490	356060	403270	500570	382090	287130	331830	292260	318560	424830	558680	471070	397230	441690	440990	544210	587890	490430	410750	412190	436730	413650	431080	478170	441610	506240	500020				Q4JA03	496825	474070	435665	410255	404140	379665	0.00784592	pass	pass
Q4JA04	2506000	2332000	3647900	3171900	3048900	2945600	3147600	2754300	2953900	2761700	2450300	2348500	2250200	1725200	1164800	1021700	2228800	2452200	2995700	2526500	3635600	3324600	4069400	3529600	2766500	2655100	2699100	1916900	2450700	2172600	3325000	3095700	2107500	1467000	3018000	3118000				Q4JA04	2419000	3409900	2997250	2950950	2857800	2399400	0.389679	fail	fail
Q4JA05	0	0	21796	17280	36196	18011	20757	13343	13131	28502	63962	60012	48811	0	0	75929	101040	81797	0	0	34572	11391	0	15500	0	0	0	0	67567	52023	10673	0	0	0	0	0				Q4JA05	0	19538	27103.5	17050	20816.5	61987	0.136331	fail	fail
Q4JA06	429650	532980	654400	706810	790620	844510	681420	680300	762030	688040	643850	889240	511480	530680	624590	841130	649390	830150	601130	678020	814520	719760	708130	718150	604100	680490	593360	445990	647740	652380	503860	531390	432320	569710	592030	704810				Q4JA06	481315	680605	817565	680860	725035	766545	0.402962	fail	fail
Q4JA07	1134000	1159500	647200	640390	1408700	1546300	1695400	1421500	1411900	1325700	1085100	993540	1247400	989760	1161700	1179600	969550	1020700	772390	792250	813860	773510	910840	819470	976900	952610	881470	716620	872500	827140	814670	740070	759840	749050	736090	670370				Q4JA07	1146750	643795	1477500	1558450	1368800	1039320	0.238763	fail	fail
Q4JA08	1300400	908180	2025400	1869200	1712900	1918100	1789400	1749500	1824700	1866400	1904100	1754500	1583100	1296600	277200	503280	1338900	1790500	1541800	1279600	2127900	2101900	2189900	1700800	1363900	983360	1546000	1103500	1868300	1788900	1894800	1819200	885330	614100	2116200	1801400				Q4JA08	1104290	1947300	1815500	1769450	1845550	1829300	0.305474	fail	fail
Q4JA09	980190	1108500	1045700	1072800	1055800	1128100	1215100	920760	1030100	1023200	1004900	1106000	1236900	1002800	1154400	1201500	983040	1155400	1226700	1121700	1252500	1293500	1301100	1195400	1450600	1262800	1270600	997190	1043900	1211500	1231400	1331000	1238100	909570	1306800	1363100				Q4JA09	1044345	1059250	1091950	1067930	1026650	1055450	0.749005	fail	fail
Q4JA10	339930	224340	490790	502110	752370	658960	797550	756540	825290	803960	690250	543640	426040	322200	192270	205330	608050	662260	297520	251480	763330	580330	728580	548510	240430	301190	451090	247220	652420	610660	554370	408010	134430	140740	604440	447820				Q4JA10	282135	496450	705665	777045	814625	616945	0.0237231	fail	pass
Q4JA11	442480	493080	347140	324980	264310	286420	285510	234420	261940	258680	334530	286560	435590	366180	549130	579880	291360	318840	447930	504820	386640	324830	346840	341240	625860	520590	500650	397050	359500	335780	478010	526890	508030	517750	406620	376800				Q4JA11	467780	336060	275365	259965	260310	310545	0.0613527	fail	fail
Q4JA12	853740	1018400	461970	478700	698160	852680	670510	569040	470040	411960	496290	543990	640300	614550	808990	884090	519080	675560	715710	851920	739530	731440	590710	710950	494850	506050	445560	376310	690710	758350	625080	655630	545780	654070	354580	438690				Q4JA12	936070	470335	775420	619775	441000	520140	0.0687868	fail	fail
Q4JA13	452520	461760	473360	407620	461190	431440	542590	525300	419580	426300	484070	422810	540980	429950	428200	339530	462610	405520	534650	509060	722130	603440	626470	491240	545760	511610	499130	404560	399340	382590	652870	656000	441480	385970	498900	460060				Q4JA13	457140	440490	446315	533945	422940	453440	0.389314	fail	fail
Q4JA14	5993600	6966300	4970700	4599000	6067500	5996200	5824600	6787100	6416700	6734200	5315600	4666400	4981100	5093500	6543900	6688500	4116400	5061700	5738300	5341300	5895000	5172300	5601600	5289100	6061400	5968900	5990500	5068700	4369500	4558400	4647400	4822000	5584700	6993900	5577900	5436300				Q4JA14	6479950	4784850	6031850	6305850	6575450	4991000	0.70409	fail	fail
Q4JA16	197060	289050	351980	323980	317800	431660	356440	237280	352760	313380	355420	403400	283290	219600	208670	329610	457320	526890	284620	237910	481400	404070	368770	310820	238850	266290	289480	173990	418200	511180	371440	342610	127820	248980	493500	368950				Q4JA16	243055	337980	374730	296860	333070	379410	0.656167	fail	fail
Q4JA17	169090	282240	231400	235120	115460	207770	115120	100750	88395	85844	162600	212680	292420	222400	291770	218440	140030	264160	350850	366510	239390	269070	225020	279550	252660	320240	244690	281360	121260	151300	287000	385450	237130	344200	165490	267640				Q4JA17	225665	233260	161615	107935	87119.5	187640	0.0299271	fail	pass
Q4JA18	163420	104600	0	105630	0	24406	100600	29819	0	39469	23691	37078	0	0	0	0	0	0	73422	108690	48124	98983	0	91285	61650	0	0	0	0	0	0	99985	62761	36569	80162	78360				Q4JA18	134010	52815	12203	65209.5	19734.5	30384.5	0.387683	fail	fail
Q4JA20	0	0	0	0	0	0	0	0	0	0	0	0	0	0	0	0	0	0	0	0	0	0	0	0	0	0	0	0	0	0	0	0	0	0	0	0				Q4JA20	0	0	0	0	0	0	#DIV/0!	#DIV/0!	#DIV/0!
Q4JA21	1739600	1384200	1513300	1766000	1763800	2295900	1740400	1456000	1559900	1772500	1433900	1607900	1343900	1109000	1154700	991160	1068700	1724600	1620600	1592600	2048100	2032100	2132300	2009000	1950400	1354800	1985700	1204300	1426900	1674800	1987800	1810800	1076800	902530	2050800	1968800				Q4JA21	1561900	1639650	2029850	1598200	1666200	1520900	0.312948	fail	fail
Q4JA22	5130200	4066600	8165200	6583800	6467900	9699300	8909600	6904300	6512900	7583700	7506000	9006100	8149900	5328800	3903400	1152600	10825000	8398600	6653900	4618900	10751000	10377000	9870100	6732200	4890600	3349200	7711900	4879300	9569900	9973500	7461100	6532700	3611000	2660800	9159900	6448100				Q4JA22	4598400	7374500	8083600	7906950	7048300	8256050	0.283805	fail	fail
Q4JA23	8391000	8982700	8339900	7402600	6692000	5764300	9674900	9095900	7067600	5935200	7190500	7486800	7244700	6074500	6214800	5089100	5865700	5539500	9983600	9136800	8643200	6392700	9503800	6587500	9837900	8132900	6124000	4461300	6136800	4592700	4981100	3758000	7343400	7942800	7209000	5925900				Q4JA23	8686850	7871250	6228150	9385400	6501400	7338650	0.849588	fail	fail
Q4JA24	1601800	706640	895290	1380600	1197500	1308300	1705500	1159300	1224500	1509300	1389600	1651700	1405800	1136600	304180	237330	1797600	1628700	1410400	1228900	1553100	1401100	1774800	747630	1357100	1269400	1219000	1035200	1459800	1725900	1452600	1396400	481550	722260	1763300	1419800				Q4JA24	1154220	1137945	1252900	1432400	1366900	1520650	0.142063	fail	fail
Q4JA25	950970	911570	658730	656030	533880	604650	565240	439400	860080	721110	507140	503450	564920	485610	475460	460490	405960	452710	686030	725310	704070	662100	719340	611350	776680	780060	692130	608890	563350	547360	750550	816380	674760	703550	796780	750750				Q4JA25	931270	657380	569265	502320	790595	505295	0.237421	fail	fail
Q4JA26	556690	376710	492410	488680	365530	366480	281760	201800	363910	386050	334430	310350	331390	228760	229230	195570	287900	294860	433510	272810	558760	673240	707760	693930	426990	300620	432910	254700	381960	352100	626310	498520	268960	200550	546950	390960				Q4JA26	466700	490545	366005	241780	374980	322390	0.0138336	fail	pass
Q4JA28	489490	505460	401330	414020	460940	544700	537880	515860	339070	348830	383420	360680	466450	337650	577620	641530	280330	266920	600220	467970	507300	415050	534120	412910	567760	460830	521920	418000	374160	371830	352690	377080	585360	532730	503030	441040				Q4JA28	497475	407675	502820	526870	343950	372050	0.225716	fail	fail
Q4JA30	947920	859290	917910	942080	950640	1042900	861310	921880	1042000	944520	1121900	1093800	1171500	912210	899750	611950	1064000	964530	1153300	1048500	909720	865030	1040900	874770	1062300	1022700	926590	794450	990370	946620	767020	842150	684700	859290	975410	1122100				Q4JA30	903605	929995	996770	891595	993260	1107850	0.293637	fail	fail
Q4JA32	0	0	98969	351960	151430	246070	110160	218520	194820	209320	147930	289140	221310	203110	129020	64668	57647	261410	0	238330	191420	260240	340300	324540	146050	102850	0	193160	261520	293830	174590	326090	0	431290	262470	349080				Q4JA32	0	225464	198750	164340	202070	218535	0.409507	fail	fail
Q4JA33	4157700	4466500	3072400	2966800	3201800	3489000	3026600	3011500	2873800	2749300	2759000	2835900	3784300	3279600	4201800	4388900	2196400	2590400	3932800	4627500	3264500	3393900	3037300	3175700	3359500	3495200	2572400	2564800	2446500	2609000	2887500	3133700	3141800	3551500	2651600	2636000				Q4JA33	4312100	3019600	3345400	3019050	2811550	2797450	0.0237998	fail	pass
Q4JA34	544870	672370	446960	430310	412330	482250	406620	343100	465390	409300	450240	445740	603430	541460	811440	710810	393110	364220	757950	815250	553320	403470	435670	480790	791330	678720	712250	589100	405330	379590	563640	659670	876010	808130	569220	579240				Q4JA34	608620	438635	447290	374860	437345	447990	0.103952	fail	fail
Q4JA35	1969100	1949100	1159800	930730	969860	878120	1580800	1003200	1067400	837990	1082700	734930	799690	590940	1523600	1526900	686390	534310	1702200	1394200	1241700	1101400	1346100	1597000	1518600	1202800	800980	867040	715670	671930	1032600	998550	2569400	1639700	1117400	989810				Q4JA35	1959100	1045265	923990	1292000	952695	908815	0.308846	fail	fail
Q4JA36	323080	216680	539260	500650	453640	459100	928670	612130	498660	544410	633680	494370	376180	271690	129470	414320	500560	522150	355910	291170	701690	585360	451510	495440	266670	239270	389350	282450	895110	548210	551020	458930	297370	242880	458500	418270				Q4JA36	269880	519955	456370	770400	521535	564025	0.0340002	fail	pass
Q4JA37	7965400	7040800	5607700	5765900	5498300	6053100	5722600	4982900	5869800	5361400	5682700	5758400	5947100	5530500	6959500	6876500	5169300	5560200	6370500	7155000	5616500	5897100	5696700	5566800	6558100	7568400	6297200	5656300	5301800	5589200	6089400	6539700	5982000	6345600	5943400	5723000				Q4JA37	7503100	5686800	5775700	5352750	5615600	5720550	0.102172	fail	fail
Q4JA38	5646600	5409400	5117000	5105200	4841900	5132000	4765500	4526200	3875600	3891600	4583200	4188000	5071600	4151000	4467600	4930500	3301500	3860100	5289000	5714600	4557200	4709600	4835000	5160100	5615800	6037100	4434200	3746100	4096900	4019400	5231800	5252200	4818200	4943200	4903900	4975300				Q4JA38	5528000	5111100	4986950	4645850	3883600	4385600	0.000814565	pass	pass
Q4JA40	7309500	6479900	6680700	5299700	5353900	5375200	5782400	5217700	7683600	6622000	6859300	6341000	5176200	5461400	3901100	4537300	5360700	5777600	6293300	5449200	7091000	6167700	7110200	5355500	5898100	5372400	5872800	4071300	5837100	4683700	7004000	7059300	3542200	5116000	5707900	4575500				Q4JA40	6894700	5990200	5364550	5500050	7152800	6600150	0.514586	fail	fail
Q4JA41	830760	650360	1062000	1173700	952620	1206000	1295500	1253300	1165700	1031900	1294800	1328000	1049900	798970	456280	571840	1142000	1262100	781710	505220	1038300	1043900	1272500	982920	946130	532640	1055700	657910	1356100	1311400	1237100	1140600	456750	691700	1275200	1246800				Q4JA41	740560	1117850	1079310	1274400	1098800	1311400	0.0295371	fail	pass
Q4JA42	3902600	4693000	3675100	4065300	4490300	5488900	4367600	4620600	4058800	3961000	3998700	5169500	3857500	4092800	5201600	5387900	2599500	4509600	3267200	3886400	3782100	4212000	3601000	4433900	3946200	4883100	4001300	3884000	3674500	4156300	4136000	5098800	4294900	5581100	3776400	5095400				Q4JA42	4297800	3870200	4989600	4494100	4009900	4584100	0.945418	fail	fail
Q4JA43	15102000	14603000	7905700	7684300	7560500	10992000	11341000	10551000	9632900	9793500	7735600	8373300	10198000	9256500	7205500	8088100	5444600	7146800	9042100	9561900	7484300	6949600	8904200	7695100	5043800	4668100	6803200	6056800	5810600	5684300	7768500	7726800	5470600	6585500	4126800	3904400				Q4JA43	14852500	7795000	9276250	10946000	9713200	8054450	0.500734	fail	fail
Q4JA44	15231000	14432000	8964600	9867900	8866300	8353700	9611800	8064800	10235000	8864100	9220600	8382400	7668700	5537600	5973800	6216300	5704200	5407600	9640900	8578000	6871600	6332900	6044000	6542500	5182700	4808700	8304300	4963200	7035100	7216200	9744500	6809500	6985200	9046600	4501600	4330800				Q4JA44	14831500	9416250	8610000	8838300	9549550	8801500	0.173416	fail	fail
Q4JA45	667100	686890	602220	674030	563040	605570	549400	532320	573220	567360	603640	566340	672240	577380	751460	613960	550050	545600	772620	825760	668190	617630	733960	740650	926050	994130	797340	702670	582330	531100	861720	876610	740640	725570	768160	770060				Q4JA45	676995	638125	584305	540860	570290	584990	0.0131598	fail	pass
Q4JA46	2940500	2863500	2800900	2759200	2265600	2817000	2924800	2265400	2639500	2639100	2908500	2747500	3162000	2235300	3273700	3536800	2712700	2241700	3412800	3331900	3078200	2605900	3566000	2869700	3929400	3947800	4066000	2910800	2758700	2295600	3512100	3503000	4107900	3097000	3404300	3049700				Q4JA46	2902000	2780050	2541300	2595100	2639300	2828000	0.708184	fail	fail
Q4JA47	1537400	1820300	1428800	1553400	1278200	1362900	1062400	1361400	1243300	1421500	1398800	1459600	1264000	1420000	2029200	2237700	1098100	1368900	1767100	2143800	1387600	1418600	1539300	1591800	1566800	2060800	1463100	1571200	1231900	1384700	1476300	1698600	1562400	1822500	1511900	1445600				Q4JA47	1678850	1491100	1320550	1211900	1332400	1429200	0.110007	fail	fail
Q4JA48	337210	385210	321100	333790	426140	442020	313410	314540	304080	279540	323120	324690	452750	389740	322030	219870	322120	481780	454730	453730	418650	426680	350360	468790	332740	349110	360190	293580	373180	359380	340770	331310	78943	176630	362570	304850				Q4JA48	361210	327445	434080	313975	291810	323905	0.0154407	fail	pass
Q4JA49	0	0	49039	48227	38893	0	43240	32310	77486	67313	72414	71488	102670	83510	0	0	125520	122970	43084	35015	97446	95319	102400	79656	81438	72295	101470	70459	158590	162720	89690	69754	0	0	98586	93061				Q4JA49	0	48633	19446.5	37775	72399.5	71951	0.0135301	fail	pass
Q4JA50	186190	129980	229680	260010	241110	218160	231970	257240	217350	202640	317890	352060	217600	201300	118590	185340	193230	235730	224340	263160	194040	237590	209790	259710	240000	358760	262640	203500	282810	271510	192710	262270	215190	191170	256060	272290				Q4JA50	158085	244845	229635	244605	209995	334975	0.120673	fail	fail
Q4JA51	122800	111120	124570	128410	126020	138250	86373	113070	101750	60264	102220	72238	111600	82395	133260	0	40236	64677	175410	170960	117430	134050	193570	80404	189960	143230	199230	89995	74615	80861	197450	166610	213160	182680	166160	170210				Q4JA51	116960	126490	132135	99721.5	81007	87229	0.00252549	pass	pass
Q4JA52	755530	453930	738200	696340	555500	825520	570520	693620	401800	695840	539950	680130	549140	492580	637810	367730	592730	801850	647290	628910	564450	808130	613820	898430	473210	298450	636330	469180	533450	731840	578060	753180	387790	734980	611670	810350				Q4JA52	604730	717270	690510	632070	548820	610040	0.342373	fail	fail
Q4JA53	143850	185260	136200	158160	151520	164140	132510	142410	132760	109740	118380	165660	125760	121240	127650	122670	119220	162360	190640	205840	105630	170230	122400	214230	219740	243890	191450	198210	130880	123730	180830	228790	231010	202220	139910	215500				Q4JA53	164555	147180	157830	137460	121250	142020	0.0563582	fail	fail
Q4JA54	3293000	2847200	2688900	2701500	3248900	3021600	3164300	2822600	2549000	2317000	2625600	2603600	3724800	2915700	2460100	1820400	2758100	3210900	3391800	3257500	3508100	3405800	3774200	3325100	1854600	1634200	2089500	1518800	2358100	2047700	3478500	3369600	2383600	1627700	2724200	2063800				Q4JA54	3070100	2695200	3135250	2993450	2433000	2614600	0.10274	fail	fail
Q4JA55	1842900	1597500	1387100	1524100	1727200	1732100	1700000	1578000	1436100	1450200	1458100	1482700	1574200	1466700	2161500	1950700	1135100	1331300	1880300	2125300	1487800	1560800	1707300	1761600	1819200	1835300	1713200	1430200	1288400	1269200	1607900	1719900	1998100	1886500	1564000	1595400				Q4JA55	1720200	1455600	1729650	1639000	1443150	1470400	0.169317	fail	fail
Q4JA56	257540	349430	219210	186130	169850	134220	150100	94168	132360	129530	98495	71009	139710	95932	145210	124110	70716	92154	267710	282940	221320	173710	243590	171100	269290	261340	160240	137790	93569	85575	258640	246330	205690	196440	200050	153770				Q4JA56	303485	202670	152035	122134	130945	84752	0.00958748	pass	pass
Q4JA57	804600	934170	699760	702680	651860	768390	598100	692660	1066100	1409700	583270	732330	572900	514160	876010	827500	480400	649300	505110	846850	653040	667690	670580	840270	637100	631270	649730	590360	577610	596270	713590	890820	693750	992360	682050	974420				Q4JA57	869385	701220	710125	645380	1237900	657800	0.547898	fail	fail
Q4JA58	1012900	850970	342100	431560	306480	331770	316430	316730	313970	405030	293510	130630	486610	441300	549830	678480	213500	319220	512650	603870	227980	297460	291680	372700	594130	726290	391300	317770	230020	242790	234250	297480	812730	900250	354150	424440				Q4JA58	931935	386830	319125	316580	359500	212070	0.0840904	fail	fail
Q4JA59	410500	696380	421060	407990	473420	663270	445370	388520	313620	397640	412540	489980	402570	455860	373820	585110	327810	456910	526120	641640	146080	336530	334520	501380	732090	602740	478530	490090	348680	293990	605700	563020	571870	826010	312030	525360				Q4JA59	553440	414525	568345	416945	355630	451260	0.109226	fail	fail
Q4JA60	57281	178000	146950	187250	152530	148560	195510	154270	154590	182300	272170	223780	396260	278650	328230	361060	201250	140100	319520	291490	201590	218200	268100	117070	223790	132540	397530	215940	265600	199010	337550	122080	323850	314450	339440	203480				Q4JA60	117640	167100	150545	174890	168445	247975	0.076802	fail	fail
Q4JA61	869500	856500	708370	741290	712230	830500	672510	752840	751910	704290	753520	809600	846660	749560	1038800	1045700	620450	834480	880660	975670	881730	893960	871810	830140	968430	1019300	895290	775870	676930	759280	855410	1056400	605600	706390	955560	915930				Q4JA61	863000	724830	771365	712675	728100	781560	0.231936	fail	fail
Q4JA62	0	0	0	37796	0	22382	21666	0	27881	45682	31903	0	0	0	0	18068	19913	0	33034	0	26693	18007	0	9345.7	39366	18589	17823	0	23804	32075	7126.9	0	0	0	64876	50661				Q4JA62	0	18898	11191	10833	36781.5	15951.5	0.289312	fail	fail
Q4JA64	546010	317200	466350	322400	267880	382750	463830	260490	423230	301530	435470	441930	355910	280150	349620	532140	297640	281580	506520	392290	403070	408080	407480	251790	507940	443280	408780	247770	373700	304320	287000	292980	539150	564880	409960	341410				Q4JA64	431605	394375	325315	362160	362380	438700	0.943688	fail	fail
Q4JA65	361100	415120	539970	515450	504410	538200	457880	396990	546200	424640	539800	547810	468970	377780	269600	247190	374340	494920	432450	395980	555800	626690	538250	519150	544270	459980	501110	400800	526740	599480	599840	553560	309540	318980	585750	527050				Q4JA65	388110	527710	521305	427435	485420	543805	0.876441	fail	fail
Q4JA66	14451000	15801000	12401000	12568000	9595700	12853000	9639300	13771000	11545000	12683000	10583000	13842000	10502000	11925000	17680000	16646000	8251500	12297000	11038000	13932000	12380000	16945000	9779200	12918000	15518000	18269000	12423000	14268000	12950000	11902000	12303000	14094000	4757300	17630000	14395000	16587000				Q4JA66	15126000	12484500	11224350	11705150	12114000	12212500	0.419022	fail	fail
Q4JA67	51576	73350	100110	90035	38871	41293	0	25572	22846	17720	52655	76744	0	63985	106460	91972	84553	52841	116370	119640	107470	52325	102810	55882	60054	0	52537	49297	93149	96419	90613	108250	0	0	43224	0				Q4JA67	62463	95072.5	40082	12786	20283	64699.5	0.0561992	fail	fail
Q4JA68	291120	568880	439910	431930	477560	429100	356500	497970	471140	535380	436200	475740	335030	383100	772090	1134500	359590	584980	376190	728780	277650	452980	367190	496590	221980	530200	324380	434750	373320	362490	496780	455740	414940	640310	244340	459860				Q4JA68	430000	435920	453330	427235	503260	455970	0.624689	fail	fail
Q4JA69	733210	920630	1628600	1694300	1334400	1386400	1560800	1503700	1145900	1122000	1525700	1808200	1259200	1366300	1008300	1596300	1195800	1321800	1082900	1353400	1522700	1447500	1598200	1387600	1427700	1445300	1439800	1194100	1435900	1287800	1531100	1614500	943960	778560	1373200	1714400				Q4JA69	826920	1661450	1360400	1532250	1133950	1666950	0.415655	fail	fail
Q4JA70	1601300	1988800	1458100	1571600	1248700	1497400	1372000	1343300	1428200	1342700	1379800	1466200	1770300	1508200	2375800	2516800	1206200	1508100	1870200	2242300	1493200	1658400	1698300	1748000	1862400	2347100	1858300	1591200	1470900	1438200	1511900	1963000	1875200	1897700	1602500	1859600				Q4JA70	1795050	1514850	1373050	1357650	1385450	1423000	0.120449	fail	fail
Q4JA72	313270	140690	244390	248880	180250	183640	287350	290270	201850	253060	238740	313270	273460	231040	169480	118690	78922	279740	215690	100230	203040	323960	318320	263300	241520	128840	192360	200510	92166	280480	286280	259570	220730	130520	266870	316090				Q4JA72	226980	246635	181945	288810	227455	276005	0.163831	fail	fail
Q4JA73	329410	263940	238920	205630	295740	187520	478630	158250	193060	236860	385890	374550	293700	309160	179200	341300	201880	269710	214330	202950	205260	297160	422840	201380	323170	242580	245090	196590	226480	215180	194640	243110	601080	303100	255530	364960				Q4JA73	296675	222275	241630	318440	214960	380220	0.385372	fail	fail
Q4JA74	2044500	1392200	1601200	1552900	1448400	1229700	1736500	1291700	1631200	1309200	1965400	1113000	2164900	1847200	2660500	916440	2258800	1421000	2501600	2224800	1395000	1323100	1471000	2285500	1549700	1184700	1888900	1416800	1001800	1012600	1499900	1356500	1286300	738390	1522800	1019800				Q4JA74	1718350	1577050	1339050	1514100	1470200	1539200	0.835546	fail	fail
Q4JA75	122230	58148	72308	104130	107570	94373	67101	86120	105020	71384	102400	105030	102710	113550	0	0	96154	67078	127450	128290	110100	102290	110520	95645	122810	95262	124360	70398	127350	110580	74877	89899	126400	0	149080	116080				Q4JA75	90189	88219	100972	76610.5	88202	103715	0.769379	fail	fail
Q4JA76	603270	847180	330490	809330	2032400	2189000	861440	1918700	912860	1526600	0	1503300	0	0	407670	565450	511150	0	0	381220	0	1301700	142510	1514600	134170	759480	223850	82730	1015100	1759800	301180	868210	368550	107140	0	176390				Q4JA76	725225	569910	2110700	1390070	1219730	751650	0.97274	fail	fail
Q4JA77	562220	304860	729670	701380	659900	669930	498740	449110	999190	569430	488320	806530	717910	541600	254070	90195	213180	758310	544690	474170	874630	652320	655520	462350	476960	443200	236650	453570	888460	733920	686710	464050	171580	241610	777260	804020				Q4JA77	433540	715525	664915	473925	784310	647425	0.787371	fail	fail
Q4JA78	483920	388020	531650	554790	522030	487750	523760	449020	591960	515760	864650	765720	780420	690280	603500	465960	734400	660230	680210	668820	777910	682260	780650	721620	985690	870300	954520	755720	854690	743550	828110	630870	462760	601520	935230	746770				Q4JA78	435970	543220	504890	486390	553860	815185	0.108999	fail	fail
Q4JA79	58340	61836	154600	70767	0	0	74138	0	0	69989	52926	58340	101940	0	69576	0	0	66718	0	0	114840	65921	70630	0	0	148920	0	115210	0	58127	57321	95922	92664	0	0	58686				Q4JA79	60088	112684	0	37069	34994.5	55633	0.59091	fail	fail
Q4JA81	970770	737840	931560	937240	771670	848250	827460	671310	826870	601630	747560	812190	767340	529260	397540	206700	575430	562720	616540	550990	968650	927050	1075800	945150	1012800	877500	1103100	684900	871390	909350	984560	1139600	633370	445700	958760	957840				Q4JA81	854305	934400	809960	749385	714250	779875	0.0559179	fail	fail
Q4JA82	976450	948950	737880	673160	656120	577740	705220	560930	731060	677420	639740	525990	913840	768600	882380	917680	611410	598620	909540	986900	491570	721680	816820	774850	1025300	1021200	782460	682450	584430	574630	925610	1033500	963930	1006000	762090	700480				Q4JA82	962700	705520	616930	633075	704240	582865	0.134836	fail	fail
Q4JA83	1175300	997580	1411700	1247200	966020	938810	1454900	1110600	1114500	1057000	1284000	1137800	1369300	1124000	876300	999640	933650	918860	1097600	1071000	1337700	1114500	1468800	1311100	1040200	1101000	1178600	969390	1101500	877180	1417500	1322900	992580	691030	842100	902250				Q4JA83	1086440	1329450	952415	1282750	1085750	1210900	0.488489	fail	fail
Q4JA84	709200	627500	660420	621180	605880	477040	630360	579980	648320	624560	728940	647600	505110	509070	523950	446930	598920	486450	365600	412750	588920	573180	454660	513470	528350	341620	519940	403370	580690	572640	521030	528360	364300	464350	497520	601950				Q4JA84	668350	640800	541460	605170	636440	688270	0.496852	fail	fail
Q4JA85	0	60304	164600	189540	112460	216370	110240	160080	147540	164030	161900	183870	161490	173320	141310	182460	83684	149440	194270	194210	168170	209420	138740	136090	182890	0	174280	147580	144550	164880	200000	245900	260700	256330	159570	119480				Q4JA85	30152	177070	164415	135160	155785	172885	0.402616	fail	fail
Q4JA86	384690	179780	462650	610240	488280	548470	421710	477280	589110	635830	462610	643490	568230	384150	354890	267130	493950	552010	467830	481320	579190	619540	648260	541410	523480	485740	474930	404650	545840	658800	557950	700850	320300	393670	595020	589910				Q4JA86	282235	536445	518375	449495	612470	553050	0.233791	fail	fail
Q4JA87	4338600	4302500	3959600	3027000	3542900	2625300	2363500	2912300	4108600	3327200	3178900	3232500	3815200	3099300	5000200	5169700	2990900	3849000	4122100	3862200	3105000	3876100	4048100	3834300	2961700	3743600	3460200	2918900	2995800	3464800	3355400	3880400	4931300	6542100	3645000	3733100				Q4JA87	4320550	3493300	3084100	2637900	3717900	3205700	0.254208	fail	fail
Q4JA88	550390	844380	1087800	975060	869370	1092200	792340	800100	656400	753320	817740	1116200	470370	665380	808290	995140	651510	842630	566160	935110	730150	1059800	568160	882290	531210	841810	440000	599650	846240	745050	661500	869520	517570	817770	479610	850750				Q4JA88	697385	1031430	980785	796220	704860	966970	0.456477	fail	fail
Q4JA89	186530	197890	258370	261050	278970	300890	343860	338040	260380	277530	433540	407650	471340	373260	479120	462500	328000	359760	351560	355150	335330	307090	364810	265800	376200	417400	411710	319240	364380	365040	319940	334000	224250	281030	317350	299120				Q4JA89	192210	259710	289930	340950	268955	420595	0.0168106	fail	pass
Q4JA91	1029300	1206500	662130	763170	594330	731730	497950	627460	796130	818210	598890	784720	848610	749870	989690	1178300	534130	631920	904030	1152000	673470	839000	683130	781060	1156800	1401200	902230	916210	620370	769710	933800	1125800	975630	1028500	888360	880530				Q4JA91	1117900	712650	663030	562705	807170	691805	0.221076	fail	fail
Q4JA92	1347000	1248200	980690	828550	713590	657640	745160	654210	751740	681610	805320	747620	817620	638020	847180	958240	495350	538840	1056900	1022500	693840	715660	757320	761560	1390200	1356500	976610	861830	536630	590600	935410	934160	1016800	947290	956220	964160				Q4JA92	1297600	904620	685615	699685	716675	776470	0.0779116	fail	fail
Q4JA93	422620	347990	400200	366280	449660	461680	582550	442630	345250	312900	408740	433680	624330	498850	728040	754030	435700	470780	560440	600470	485590	493620	497780	494270	533740	606140	554510	454840	399130	400620	423320	437980	544500	533740	487340	454400				Q4JA93	385305	383240	455670	512590	329075	421210	0.768655	fail	fail
Q4JA94	0	86871	182470	0	197840	189150	136380	150170	128340	129670	196440	212890	229280	189750	0	270380	220980	242420	249020	266890	240650	203370	144590	231290	0	0	160130	151620	234100	179510	229050	236790	0	172330	114080	0				Q4JA94	43435.5	91235	193495	143275	129005	204665	0.255271	fail	fail
Q4JA95	3222200	4080900	2622100	2628900	4209700	5102800	3924100	3703700	3014700	2705500	3017700	2993100	4088300	3247100	5120500	4978300	3771100	4476100	3901200	5019400	3724100	4207400	3846700	4346800	2954200	3385300	3133100	2882700	3283900	3335600	2943000	3212800	2567900	3443600	2793800	3010300				Q4JA95	3651550	2625500	4656250	3813900	2860100	3005400	0.372789	fail	fail
Q4JA96	275630	250180	174770	280300	223460	249710	121510	292110	302560	289080	217120	170720	283220	180550	219660	165510	241070	130400	318550	156670	296140	245910	209170	219030	361960	351390	356650	244320	214780	167740	336210	267930	292320	132450	385390	331620				Q4JA96	262905	227535	236585	206810	295820	193920	0.774177	fail	fail
Q4JA97	124670	155560	230650	268590	311790	404430	197520	298240	242920	250850	329010	349760	326380	307240	405440	459030	266980	359850	113610	337040	299370	393230	423020	383940	300600	426020	323720	352810	327940	386050	382940	412200	220910	241480	381490	465390				Q4JA97	140115	249620	358110	247880	246885	339385	0.56365	fail	fail
Q4JA98	4521400	4037300	3924000	4366400	3316000	4214700	4667700	5418800	4048500	4255300	3641400	3212900	4362500	3696300	3670200	3626900	3118300	3097900	3720800	3714100	4732300	3833400	6469400	5081300	2287700	1999200	2422700	2094500	3085200	2618200	2852900	4163300	2569600	2886600	3077400	2810000				Q4JA98	4279350	4145200	3765350	5043250	4151900	3427150	0.698452	fail	fail
Q4JA99	111770	127410	110220	149480	149100	179450	158550	136480	113280	146450	163730	194740	221970	193750	319330	370660	197790	232450	238210	296500	134670	223100	158740	204970	238060	310000	222490	204810	139690	139920	259650	275830	225540	269210	184880	227020				Q4JA99	119590	129850	164275	147515	129865	179235	0.381581	fail	fail
Q4JAA0	2889100	4063100	2691900	2802600	3081500	3154100	1718300	2625600	2671800	3472700	2370900	2983800	2281900	2872700	3236700	4500000	2017600	2908900	1891100	4638600	2602600	3483300	2231900	3192800	1983500	3447300	1922700	2146500	2425400	2512600	2495800	2958500	1898400	4558800	1913300	2582800				Q4JAA0	3476100	2747250	3117800	2171950	3072250	2677350	0.163118	fail	fail
Q4JAA1	10213000	11378000	6987600	7368400	7056000	8378600	5577700	5454800	5692200	6160200	5712800	6444400	7807000	7170700	9960800	10636000	4784900	5651600	8642400	10356000	7243000	7465400	6272100	7413000	8161400	8471300	7164200	6357500	5294800	5476100	7133400	8158300	8900400	10831000	6972300	7846800				Q4JAA1	10795500	7178000	7717300	5516250	5926200	6078600	0.00520659	pass	pass
Q4JAA2	927850	930670	3436100	3084500	2073600	2562900	2551600	2463800	581150	579660	1181900	1377400	1729500	1426100	1390800	1468600	1615700	2104200	2399300	2195500	1911300	1838800	4657100	3562700	680250	591220	686020	766050	824920	1193100	1324700	1658100	1120500	889250	597020	343730				Q4JAA2	929260	3260300	2318250	2507700	580405	1279650	0.233927	fail	fail
Q4JAA3	240790	136640	194790	278560	219650	204670	195240	220650	183620	215380	225110	221210	233760	236740	295380	96911	192830	188640	277330	193440	232950	252910	245140	250530	399400	287380	316030	186410	218990	181320	225860	226070	269450	193920	323580	243690				Q4JAA3	188715	236675	212160	207945	199500	223160	0.912829	fail	fail
Q4JAA4	191420	615680	360870	489310	392210	597940	248360	584700	191950	388350	279550	507430	253600	576310	756260	975460	208080	414300	338810	797940	296540	581800	106160	583400	272980	780270	213880	630230	251330	505570	298710	548380	345940	856710	139080	559460				Q4JAA4	403550	425090	495075	416530	290150	393490	0.432021	fail	fail
Q4JAA5	523610	506020	596150	582410	514090	733120	691370	624990	564120	473950	680230	748210	489480	427640	184290	161020	333060	532930	425850	381400	635260	714010	759460	660630	719060	885550	671140	592520	558310	575710	590600	633080	547120	348320	663360	920270				Q4JAA5	514815	589280	623605	658180	519035	714220	0.330947	fail	fail
Q4JAA6	2018800	1842600	2040800	1986700	2537900	2356200	2550000	2409600	2113600	2001800	2294900	2367700	1788500	1775000	1804800	1920900	1966300	1812600	1909400	1930800	1959500	1764000	2033000	1927400	2019000	2005900	1980000	1628300	1777900	1636300	1855100	1901100	1666800	1843100	1931600	1816300				Q4JAA6	1930700	2013750	2447050	2479800	2057700	2331300	0.264389	fail	fail
Q4JAA7	893000	690040	961650	952850	520940	488910	873340	671380	1382900	1211200	1081400	803910	1221600	825590	674260	303630	836140	805730	809040	595620	1009100	1107000	1190700	1059900	1798000	1686100	1843200	1398600	1201100	1067900	1315100	1097400	805560	860210	2300800	2124600				Q4JAA7	791520	957250	504925	772360	1297050	942655	0.101839	fail	fail
Q4JAA8	5462500	6461100	4177600	4272300	4306900	4973200	3219800	3705800	3656800	3735700	3341500	4655700	3198600	4121800	6988000	7081200	2976800	4724300	3845800	6393500	3762800	5416900	1662200	5320800	3115200	5484300	2891500	4039700	3815500	4611700	4393700	6317300	3757900	7161100	3298600	5525200				Q4JAA8	5961800	4224950	4640050	3462800	3696250	3998600	0.0154901	fail	pass
Q4JAA9	4257100	5241300	3198200	3125600	3034800	3130400	3527400	3290500	2825800	3473000	3434400	3384100	4393100	3986100	5227500	5379200	3133400	2799000	4603300	4674700	2892800	3008800	3011800	3317200	3009500	3062800	2445900	2499400	2605800	2732500	3424900	3422300	3321700	4824400	2465500	2139300				Q4JAA9	4749200	3161900	3082600	3408950	3149400	3409250	0.390484	fail	fail
Q4JAB0	4780500	4929400	3383800	3052600	2988700	2746200	3676000	3264200	3738200	3217200	3097700	2345200	4139500	3191500	4056800	4005600	2509600	2315000	4186100	4012100	3137000	3086000	3611400	3193300	4632700	4534000	3840100	3128000	2656900	2350600	3489300	3130100	4625500	4441100	3346300	3129200				Q4JAB0	4854950	3218200	2867450	3470100	3477700	2721450	0.360055	fail	fail
Q4JAB1	1172700	1210000	1428600	1532900	1229800	1193200	1808500	1633100	1276900	1205400	1442200	1315200	1296500	1028200	1044000	830320	1294300	1435100	1359600	1212100	1746400	1730100	1701600	1542200	1429100	1339000	1622900	1101900	1522000	1462800	1909700	1740200	1035500	1062200	1733800	1944000				Q4JAB1	1191350	1480750	1211500	1720800	1241150	1378700	0.206335	fail	fail
Q4JAB2	558390	723400	507810	513470	487720	712610	433500	366080	437360	353970	474180	489580	197670	163220	498010	796390	375420	283360	532860	612450	580420	583360	499430	525610	517140	511800	392670	383980	593850	572150	331000	408570	630340	737780	536670	673190				Q4JAB2	640895	510640	600165	399790	395665	481880	0.00905888	pass	pass
Q4JAB4	1500700	1473200	1449300	1505900	1100700	1370500	1068800	942430	892060	907970	1173000	1149500	1534400	1364400	1652900	1690900	1066700	1208900	1855400	1951900	1485300	1458400	1639900	1551800	1791200	1801900	1463500	1389700	1178300	1187000	1451500	1390800	1575500	1414900	1399300	1474900				Q4JAB4	1486950	1477600	1235600	1005615	900015	1161250	0.000893041	pass	pass
Q4JAB5	0	0	118140	81346	98248	121590	264470	106160	146850	70881	131380	89912	42848	0	0	0	231900	113340	0	0	100870	92491	85378	101900	0	0	0	73992	96109	86460	146610	99098	49029	0	167780	108250				Q4JAB5	0	99743	109919	185315	108866	110646	0.10362	fail	fail
Q4JAB6	95903	54573	105360	94025	88069	93864	146950	112110	126830	99980	90583	123770	44678	0	35384	0	78526	105870	37054	61158	97321	90654	99020	80958	140420	94203	150040	111580	117160	162730	95427	25707	0	59357	136350	94556				Q4JAB6	75238	99692.5	90966.5	129530	113405	107176	0.0282464	fail	pass
Q4JAB7	412180	378290	295180	274030	353690	340140	367480	337120	370300	346770	279040	286390	414850	353010	414920	446510	293500	345680	342710	385340	353870	333410	407500	382460	425550	417630	410500	354690	326890	336990	381500	362320	371740	342640	356470	339520				Q4JAB7	395235	284605	346915	352300	358535	282715	0.684855	fail	fail
Q4JAB8	7613900	6083800	4811100	5912000	5905300	8145500	5121900	4570400	4676200	3488500	4938500	4086300	5783700	4397200	3811000	3230900	5604000	3521100	5403400	4995400	5860200	5559900	6782200	6238300	2640600	2596500	2572100	2146500	3417500	5479900	5127300	3146800	5606500	6446000	3185200	3093600				Q4JAB8	6848850	5361550	7025400	4846150	4082350	4512400	0.00628275	pass	pass
Q4JAC3	192000	160000	248270	234820	230070	234390	288390	248730	219160	209760	304130	284430	399460	322830	209780	241680	252610	262600	379780	330520	298790	300760	330170	287440	437410	310680	422500	316180	313020	330490	408110	369220	228080	138890	310170	300640				Q4JAC3	176000	241545	232230	268560	214460	294280	0.071168	fail	fail
Q4JAC4	715940	411070	624790	709770	684530	814950	647850	550460	777560	625650	750400	773550	879450	674600	621560	608720	629320	1016400	912340	802000	803370	974080	897080	925100	829930	647530	730550	576290	795970	846130	843830	911840	533540	491060	804760	1024300				Q4JAC4	563505	667280	749740	599155	701605	761975	0.693718	fail	fail
Q4JAC5	1184800	1470700	1382700	1576700	966570	1143300	831510	938400	1377300	1276600	1204700	1381500	1344200	1334800	1284000	1200300	848570	1101700	1231200	1342500	1364500	1487500	1469000	1603500	1891200	1739000	1175200	1005400	1219700	1252900	1509400	1456200	1271000	994320	1443300	1647900				Q4JAC5	1327750	1479700	1054935	884955	1326950	1293100	0.390781	fail	fail
Q4JAC6	0	696670	424430	438980	475110	573490	186520	282560	274060	260290	301690	309020	183020	0	349350	386710	194530	280430	143580	570680	222480	405130	269970	269780	0	263910	0	245690	132180	248350	156500	242510	0	476570	182640	181800				Q4JAC6	348335	431705	524300	234540	267175	305355	0.121781	fail	fail
Q4JAC7	213080	260140	164150	164380	441120	387920	417020	423100	468140	371030	258600	258500	232680	198900	253180	273200	275950	285180	145410	212810	267740	230640	227510	186520	167810	177540	176290	175700	333740	282710	191400	159830	186090	136140	237450	193300				Q4JAC7	236610	164265	414520	420060	419585	258550	0.147697	fail	fail
Q4JAC8	1833900	1889700	1896600	1611100	1473400	1290300	2033000	1567800	1534800	1235500	1915100	1421600	2193200	1783800	2378600	2007100	1587700	1098100	2422000	2226600	1500600	1453200	2130200	1685400	1701700	1426200	1690000	1313800	1523600	1214100	1909700	1765700	2504700	2088000	1538100	1296500				Q4JAC8	1861800	1753850	1381850	1800400	1385150	1668350	0.770863	fail	fail
Q4JAD0	4978300	4188400	4214100	4474100	4850400	4491600	4963800	4408500	5596500	4835600	4443200	4197700	5081400	4312700	4014700	3675800	4206400	4422800	4901700	4370900	5118500	5060500	5346200	5164400	3938500	4113600	5343000	3898200	4708200	4040300	6055400	5834200	3982300	3690200	4941900	4829700				Q4JAD0	4583350	4344100	4671000	4686150	5216050	4320450	0.416707	fail	fail
Q4JAD1	1829300	1860700	1671700	1647900	1747400	1741400	1682500	1629600	1475400	1435700	1477000	1502900	1664700	1518500	1868000	2100300	956470	1230500	1568300	1788300	1451500	1633200	1278100	1493000	1864000	2007900	1688700	1421700	1470100	1603000	1263200	1415500	1941600	2089300	1448700	1765200				Q4JAD1	1845000	1659800	1744400	1656050	1455550	1489950	0.00218782	pass	pass
Q4JAD2	0	0	115530	0	329810	298060	110970	177780	171070	164620	40441	78373	0	0	0	0	98106	142810	0	0	112860	78421	97866	0	0	0	35654	0	105290	115250	0	0	0	0	0	0				Q4JAD2	0	57765	313935	144375	167845	59407	0.999718	fail	fail
Q4JAD3	26588000	24552000	18479000	18395000	22412000	25614000	20383000	19828000	9527800	11048000	16616000	15609000	16013000	14290000	22482000	25421000	14745000	15292000	25578000	25577000	20194000	18432000	24047000	21995000	12791000	13715000	16160000	13732000	14498000	13745000	20965000	19575000	23869000	23524000	14912000	14831000				Q4JAD3	25570000	18437000	24013000	20105500	10287900	16112500	0.0116685	fail	pass
Q4JAD4	870730	687090	816700	758960	786800	821920	1023000	797300	844110	763850	849130	844170	1001000	775840	624470	773920	915060	974380	781160	827420	981510	1011500	921080	936230	1209100	1123800	1139800	861150	963040	855010	1039100	928370	761190	642840	1160800	1091400				Q4JAD4	778910	787830	804360	910150	803980	846650	0.187563	fail	fail
Q4JAD5	473570	530180	360800	366180	308060	368760	399280	262020	415020	362080	384160	379280	519960	465060	438100	490690	321210	351000	427190	375720	346490	287410	470760	319780	595500	853010	567410	370800	370550	313500	325220	406700	548380	394860	484590	315050				Q4JAD5	501875	363490	338410	330650	388550	381720	0.417459	fail	fail
Q4JAD6	0	0	0	0	0	0	0	0	0	0	0	0	0	0	0	0	0	0	0	0	0	0	0	0	0	0	0	0	0	0	0	0	0	0	0	0				Q4JAD6	0	0	0	0	0	0	#DIV/0!	#DIV/0!	#DIV/0!
Q4JAD9	0	0	26834	11983	37053	42746	45108	46546	54475	56961	57217	85936	28553	0	0	0	103250	64302	0	17312	29775	19687	17675	0	0	0	0	0	63196	47848	16578	14581	0	0	17554	0				Q4JAD9	0	19408.5	39899.5	45827	55718	71576.5	0.00286747	pass	pass
Q4JAE0	0	90764	83806	63400	86497	96932	74117	83624	62512	36771	62761	71786	0	60772	82163	0	40402	76735	60442	84365	60529	96051	61166	85660	46696	112490	73415	82382	70353	81997	42446	99412	0	137740	71031	83859				Q4JAE0	45382	73603	91714.5	78870.5	49641.5	67273.5	0.764845	fail	fail
Q4JAE1	2273200	2378200	1960000	2172300	4576200	5393300	3316200	3020300	1436400	1317700	1654800	1764200	1979100	1574100	2510100	2160200	1735400	2054400	2106600	2168500	1988000	2054400	2428400	2268800	873590	995470	1017400	938640	982970	1018100	2065400	2162700	1522800	1480200	809720	792040				Q4JAE1	2325700	2066150	4984750	3168250	1377050	1709500	0.165161	fail	fail
Q4JAE2	319510	263910	248790	251990	165470	227420	212410	189850	158540	198650	237450	233430	348870	276530	384070	337720	201370	258130	360380	336680	299690	326490	322020	277280	371750	378120	397600	294900	255600	242630	313240	350310	447010	413070	365980	304400				Q4JAE2	291710	250390	196445	201130	178595	235440	0.114208	fail	fail
Q4JAE3	0	354680	372020	453420	233010	294840	300720	361900	409800	332600	393130	381380	592590	456230	0	0	370190	367110	0	433210	459980	427590	375470	335080	677550	545920	718470	541310	502520	479420	451000	482510	0	0	732240	613560				Q4JAE3	177340	412720	263925	331310	371200	387255	0.265262	fail	fail
Q4JAE4	244110	236940	248250	236020	193130	213800	259480	209030	185180	127790	257820	221350	275290	178320	426200	289730	245800	203310	326280	281840	323020	264010	337420	278080	337320	368590	421980	275470	295010	266450	336180	306870	328480	263270	352600	287140				Q4JAE4	240525	242135	203465	234255	156485	239585	0.416814	fail	fail
Q4JAE7	1150900	1265400	955280	1317300	2153300	1529300	1741700	2608300	2168800	1885100	1844100	2309300	1623300	1466200	1889600	1951300	2068400	1869700	815870	994830	1757000	1822800	1633400	1531700	779100	849620	1241500	1032300	1350500	1479300	1155400	1518200	1063100	916080	1209700	1220600				Q4JAE7	1208150	1136290	1841300	2175000	2026950	2076700	0.00930478	pass	pass
Q4JAE8	0	130440	49346	0	50544	0	0	22490	39364	52110	22885	0	19901	103310	0	0	9174.9	0	0	0	0	0	0	0	0	0	0	0	12121	0	0	0	0	144640	0	0				Q4JAE8	65220	24673	25272	11245	45737	11442.5	0.506433	fail	fail
Q4JAE9	3938200	3082600	2694300	2151800	1753600	2525500	2159100	1581300	2655500	2130400	2592600	2638500	2648800	2579300	2818300	2880100	3230800	3786900	2861900	2950200	2086400	2313900	1811500	1751600	2373500	2442000	2435300	1942100	2382700	2846000	2401100	2408800	2886900	3409700	1991900	1976200				Q4JAE9	3510400	2423050	2139550	1870200	2392950	2615550	0.289304	fail	fail
Q4JAF0	3186400	2884300	3081600	3099100	2494300	2405600	2478900	2373400	2810300	2727500	2990300	2803400	2897600	2841100	3629000	3202400	2226400	2736900	2801200	3452600	2943200	2845000	2961700	3146500	3526700	3941400	3237600	2676700	2822400	2493800	2917300	3008900	2892000	3197100	3160700	3301000				Q4JAF0	3035350	3090350	2449950	2426150	2768900	2896850	0.351555	fail	fail
Q4JAF1	4506700	5337100	3672200	3790100	3821000	4313500	3866800	3515800	3563800	3952700	3237000	3346500	5073500	4297300	3404000	4707000	3137200	3092000	5487600	4995500	3659200	3731000	4526200	4248100	3079600	3414300	4308800	2921100	2775000	3079000	4544200	4758600	2826000	3234600	3259100	2872400				Q4JAF1	4921900	3731150	4067250	3691300	3758250	3291750	0.0411344	fail	pass
Q4JAF2	433320	403110	162220	135940	122710	151240	106500	109550	126940	119580	80284	69148	78302	66705	137000	124630	36671	93631	208220	237340	217800	193330	200580	227760	186530	115020	189140	130880	69675	133580	117830	174960	292520	198990	132520	172040				Q4JAF2	418215	149080	136975	108025	123260	74716	0.0485722	fail	pass
Q4JAF3	2021000	1637500	2058600	1912900	1461800	1764900	1877200	1665000	1883300	1813900	1990900	2088000	1725600	1421600	2014900	2332800	1757800	2150700	2082700	1844900	2079700	1995900	2168300	1891000	1473300	1966000	1868100	1641000	2044700	2076400	2105000	2192700	2377800	1997500	2244600	1956400				Q4JAF3	1829250	1985750	1613350	1771100	1848600	2039450	0.507513	fail	fail
Q4JAF4	83184	85023	53917	67942	48420	46518	44570	32120	51790	56656	54472	50930	52520	50961	49691	11667	57019	67593	85386	81099	60949	89788	44250	80463	96978	104030	96306	85937	53049	31555	96181	122600	45181	32304	87941	110700				Q4JAF4	84103.5	60929.5	47469	38345	54223	52701	0.0746307	fail	fail
Q4JAF5	3534600	3626200	1990000	2935200	2889100	4685500	3460400	4246400	2661300	2813200	2928100	3167800	3151100	2659300	3796400	4518400	2204400	2659700	2460900	3668800	2227200	3453100	2975600	3127800	1403900	1803800	1892100	1879400	1970400	1973200	2383400	2894100	1294100	2167000	1464600	1854200				Q4JAF5	3580400	2462600	3787300	3853400	2737250	3047950	0.887073	fail	fail
Q4JAF6	1357700	1164900	1815600	2039400	1157700	1519900	1874000	1476100	2141800	1460000	1815800	1931100	2226400	1473000	1994300	1333900	1957800	2079100	2689300	1677900	2405700	2132900	2618900	1861400	2637400	1912100	1786600	1104800	2849800	2303400	1604200	2292800	1630300	1023500	2418100	2372000				Q4JAF6	1261300	1927500	1338800	1675050	1800900	1873450	0.164158	fail	fail
Q4JAF7	439520	409470	216050	236830	189140	266550	189790	159950	242000	227180	151860	216830	227740	194550	285170	340760	188100	159000	311330	246030	179710	194160	255490	243230	107570	125040	0	99874	129940	134720	252290	264860	0	211720	102420	91178				Q4JAF7	424495	226440	227845	174870	234590	184345	0.063862	fail	fail
Q4JAF8	18881000	17615000	12192000	11917000	13418000	13989000	14826000	14890000	14886000	14277000	11548000	10146000	13669000	11704000	10592000	15823000	10716000	11755000	13132000	13150000	12500000	12260000	14278000	13391000	14908000	14202000	13793000	11334000	9491800	9699700	12711000	12195000	15731000	14002000	12714000	12168000				Q4JAF8	18248000	12054500	13703500	14858000	14581500	10847000	0.413698	fail	fail
Q4JAF9	14760000	16381000	10172000	12777000	9701500	11714000	9124800	12098000	9232400	10538000	9493400	10414000	9239200	9914800	15505000	15612000	6195000	8821000	12730000	13472000	8990500	10826000	11225000	13038000	9036500	10421000	8227100	8272400	7637300	7306500	8674800	10550000	11213000	11649000	7360700	9228200				Q4JAF9	15570500	11474500	10707750	10611400	9885200	9953700	0.0623634	fail	fail
Q4JAG0	4268400	3111700	2691100	1751800	1627800	1511800	2808300	1688000	2181600	1888600	1671500	1959100	957180	909430	1631000	1211600	756580	796800	1815900	1152100	1747700	1081500	2683200	1931400	915530	642330	884660	608640	829230	635250	1700300	1270500	0	2651700	949800	545040				Q4JAG0	3690050	2221450	1569800	2248150	2035100	1815300	0.35357	fail	fail
Q4JAG1	151750	166920	250740	231190	284580	360200	387500	314610	277020	272810	285490	212930	278940	164250	240610	184450	226110	303630	265970	223880	317720	300520	250720	259180	263760	241720	257470	269730	368810	334230	328230	330570	160530	86034	357110	297060				Q4JAG1	159335	240965	322390	351055	274915	249210	0.224658	fail	fail
Q4JAG2	832080	809920	537480	449400	624770	371580	489060	579220	488030	582470	454640	369670	196140	396310	647960	804620	391620	299420	306330	662940	411870	379490	353640	427680	447140	659790	402800	529170	391410	388410	502920	660440	371230	668490	280570	447840				Q4JAG2	821000	493440	498175	534140	535250	412155	0.215917	fail	fail
Q4JAG3	119830	108510	68331	35347	42886	116290	110790	49906	34034	51396	69383	65223	79108	92218	110900	0	64349	51418	0	89584	28382	0	45124	28282	123740	140820	37494	57500	65561	48554	56719	44545	114880	139690	173960	112780				Q4JAG3	114170	51839	79588	80348	42715	67303	0.352123	fail	fail
Q4JAG4	582150	564500	812550	875550	795590	1026300	917410	883960	759030	725740	822100	936840	496870	550660	348470	386050	555900	673890	408450	699240	853400	896650	859130	864100	611400	598810	358000	372180	739270	816610	369910	378490	235140	452040	687520	812880				Q4JAG4	573325	844050	910945	900685	742385	879470	0.439297	fail	fail
Q4JAG5	0	0	0	31329	0	43274	32571	36278	0	7550.9	0	26417	0	0	0	0	0	9128.8	0	0	19276	12667	30543	0	0	0	0	0	19806	31639	7888.6	0	0	0	0	10789				Q4JAG5	0	15664.5	21637	34424.5	3775.45	13208.5	0.663294	fail	fail
Q4JAG6	2075400	1444300	2661400	2462600	2374900	2487200	4082800	2667700	2981500	2998900	2616600	1963100	1656900	1328800	842060	404410	2769000	1880700	1665800	891130	2533500	2052400	2922600	2084900	2058700	954950	2010700	1184800	3147800	2537300	1925100	1623400	988880	815910	2506100	2410700				Q4JAG6	1759850	2562000	2431050	3375250	2990200	2289850	0.0886665	fail	fail
Q4JAG7	5392800	7588800	4650100	4262300	3543700	3425000	4104500	4675200	3903900	5127800	3917800	3257900	4303200	4224300	2862100	1946700	2888900	2640800	4080600	4531800	3301300	3899500	3553000	3885100	4661100	5498900	4928200	4631500	3931100	3519200	4512700	4840400	4527700	6661200	4150500	4449600				Q4JAG7	6490800	4456200	3484350	4389850	4515850	3587850	0.367512	fail	fail
Q4JAG8	377320	358180	500000	519250	657090	534120	513040	477410	481760	419950	614690	568600	525700	384200	513830	580860	533150	615690	640430	545000	792630	640130	745270	567830	789110	664230	758900	508660	702280	612400	815850	859860	379600	544640	785770	717520				Q4JAG8	367750	509625	595605	495225	450855	591645	0.69406	fail	fail
Q4JAG9	351310	216670	155170	102880	453780	464500	292550	201580	175570	269660	176780	280000	256390	226960	106080	64106	0	474270	0	0	0	0	0	0	0	79205	0	0	336300	484230	111070	0	96724	0	0	85928				Q4JAG9	283990	129025	459140	247065	222615	228390	0.405854	fail	fail
Q4JAH0	139590	141530	60769	89547	40867	47515	64515	59369	64732	98752	58650	48115	135690	110960	110120	155700	66777	67028	119440	206680	81248	101010	72048	107090	155700	174620	162130	101740	138310	68234	91658	130380	222310	114840	110280	129630				Q4JAH0	140560	75158	44191	61942	81742	53382.5	0.312073	fail	fail
Q4JAH1	13385000	11457000	4851700	5011200	4312500	5157100	6034000	6301700	3239300	3352800	4387100	4361100	5020500	4590100	8544000	9751800	3647300	4337900	7532000	7602400	5279500	5573400	5695600	6214900	3330900	3756600	3890200	3297700	3848600	4145500	5518900	6249600	7993100	8457800	3232900	3850300				Q4JAH1	12421000	4931450	4734800	6167850	3296050	4374100	0.138446	fail	fail
Q4JAH2	594530	503290	1050100	917270	850890	892290	1726000	1506900	1272600	1219300	928100	1033400	1040300	755400	123520	99346	1060700	1230800	655230	490060	1310500	1220500	1247600	1121900	999140	657570	1370400	598200	1414800	1417100	1483300	1279200	288390	156220	2013300	1787800				Q4JAH2	548910	983685	871590	1616450	1245950	980750	0.00883022	pass	pass
Q4JAH5	2984000	4216700	3772700	3910200	3693300	3770200	4201100	3148700	3374100	3140900	3086700	2984000	3724600	3892300	3268300	3952000	3556000	2585000	2352000	4338400	3996100	3409400	2936500	4306500	3774100	3969700	4201700	3955700	3436200	2302400	2373600	2965500	2697100	3693500	4879400	3480200				Q4JAH5	3600350	3841450	3731750	3674900	3257500	3035350	0.135516	fail	fail
Q4JAH6	0	85097	66539	81877	75389	74946	29857	66707	30883	51328	53594	70887	42650	31894	61418	76971	68588	105730	39582	55748	71182	83246	67127	84240	0	53527	31286	29352	61887	55278	66259	112050	0	119450	54551	51045				Q4JAH6	42548.5	74208	75167.5	48282	41105.5	62240.5	0.387012	fail	fail
Q4JAH7	1286900	1265300	1416300	1213300	883040	1006900	1613800	1294300	0	738660	768170	624800	1702700	1287300	1270600	1260600	826070	647320	1715500	1569800	1121800	1093000	2237500	2025600	755150	659870	695410	377840	552720	506170	0	929710	1100500	715790	702510	700540				Q4JAH7	1276100	1314800	944970	1454050	369330	696485	0.193007	fail	fail
Q4JAH9	0	0	0	79358	0	54336	35065	0	0	0	0	0	0	0	0	0	0	37242	0	0	78550	63977	47170	56945	0	0	0	0	0	44649	97216	0	0	0	0	108920				Q4JAH9	0	39679	27168	17532.5	0	0	0.316641	fail	fail
Q4JAI0	2191900	2460400	2908400	2864000	3356100	3615700	2957700	2935600	2748000	2792400	2951300	3306400	2790700	2529300	3763500	3745200	3065500	3521000	2946800	3110200	3402200	3746700	3130200	3050000	2893700	2730700	2628600	2400200	2989100	3193800	3253000	3686300	2564500	2753700	3241200	3069200				Q4JAI0	2326150	2886200	3485900	2946650	2770200	3128850	0.836201	fail	fail
Q4JAI1	16279000	13690000	10766000	13308000	9811600	12026000	11662000	11843000	12423000	12190000	9448500	8084000	11202000	10825000	11297000	11698000	9566100	9547700	11503000	13468000	11202000	12401000	13311000	14310000	11660000	12731000	11627000	9015700	9605200	9089100	11581000	11395000	15897000	14684000	12006000	11092000				Q4JAI1	14984500	12037000	10918800	11752500	12306500	8766250	0.180906	fail	fail
Q4JAI2	1247300	1373800	955230	929570	619800	773680	563690	503870	887260	571520	782430	941140	1380000	1054900	1433800	1238900	1110000	1038700	1049800	1271400	936800	815460	924000	648270	1035300	1008900	940730	719020	738800	689270	965870	1150900	1079900	661400	774110	565440				Q4JAI2	1310550	942400	696740	533780	729390	861785	0.0751709	fail	fail
Q4JAI3	9116600	9480700	6317400	6818200	6440100	8216200	7729000	6739400	5219400	5064600	5303000	6276100	6317100	5340600	7952600	8284100	5171200	5678000	7634500	8401200	7906000	8004200	8076100	8068600	6593500	6541500	5538000	4968300	5457700	5818900	7715500	8246000	8823100	8570100	7776800	8301600				Q4JAI3	9298650	6567800	7328150	7234200	5142000	5789550	0.0407175	fail	pass
Q4JAI4	6650100	6418500	6974000	6692900	6418500	7065000	6795800	5955100	6466200	5950300	6893900	7103800	7144600	5680000	6740000	5896700	5742900	6870000	7680200	7454300	7559700	7260900	8036000	6869000	8684000	7380500	7296600	5816300	6722300	6836700	7572500	7003200	5998600	4804600	7846500	7387700				Q4JAI4	6534300	6833450	6741750	6375450	6208250	6998850	0.460643	fail	fail
Q4JAI5	5642600	6495900	4738900	4777300	4153700	3849300	6437300	5367200	5085400	5056800	4812000	4246000	6470900	5908000	8292500	8804100	4084900	4097100	5713100	6290300	4989100	5035300	4413000	4924500	7046000	7969500	6242800	5792100	5099000	4717100	6770800	6438200	5932800	6838900	6599300	6245900				Q4JAI5	6069250	4758100	4001500	5902250	5071100	4529000	0.661662	fail	fail
[truncated: 568 more rows]
[truncated: 65 more columns]

## Sheet: WT rich vs. WT starved
Name/Category	MW001-1-F	MW001-2-F	MW001-3-F	MW001-1-S	MW001-2-S	MW001-3-S	t-Test	t-Test 0.01	t-Test 0.05	high abundant	ratio	log2(ratio)	absolute_log2	10% difference	(leer)
[truncated: 1,783 more rows]

[truncated: 4 more sheets: WT rich vs. ArnA rich, WT rich vs. ArnB rich, WT starved vs. ArnA starved, WT starved vs. ArnB starved]
