# Supplementary material for: Phosphorylation-driven conformational switching of the ArnA–ArnB complex involved in archaeal motility regulation
Source: Front Microbiol. 2026 Jan 15;16:1717585. doi: 10.3389/fmicb.2025.1717585 (PMC12852372; doi:10.3389/fmicb.2025.1717585)
Supplement: Supplementary file 5 [file Table_4.XLSX]

## Sheet: Model organisms-AFDBproteome
AF2 models	Description	Organism	Prob.	Sequence Id.	E-value	Score	Query Position	Target Position
AF-K7TP80-F1-model_v4	Zinc finger (C3HC4-type RING finger) family protein	Zea mays	1	15.4	6.01e-25	740	2-376 (380)	13-419 (503)
AF-C4J5Y0-F1-model_v4	Zinc finger (C3HC4-type RING finger) family protein	Zea mays	1	15.8	4.02e-25	738	2-376 (380)	26-433 (516)
AF-Q6K8E9-F1-model_v4	Os02g0806700 protein	Oryza sativa Japonica Group	1	17.1	1.19e-24	732	1-376 (380)	226-668 (723)
AF-K7TUS1-F1-model_v4	Putative RING zinc finger and VWF domain family protein	Zea mays	1	16.5	6.74e-25	722	1-376 (380)	204-646 (704)
AF-C0P695-F1-model_v4	Zinc finger (C3HC4-type RING finger) family protein	Zea mays	1	15.8	9.5e-25	704	2-376 (380)	233-673 (731)
AF-A0A1D6GPU3-F1-model_v4	Zinc finger (C3HC4-type RING finger) family protein	Zea mays	1	15.6	5.67e-25	702	3-375 (380)	199-622 (703)
AF-K7U204-F1-model_v4	Putative RING zinc finger and VWF domain family protein	Zea mays	1	16.4	2.82e-24	695	2-376 (380)	198-638 (688)
AF-Q10RY0-F1-model_v4	Os03g0142500 protein	Oryza sativa Japonica Group	1	16.8	3.76e-24	695	2-376 (380)	204-630 (694)
AF-A0A1D6JNC9-F1-model_v4	Zinc finger (C3HC4-type RING finger) family protein	Zea mays	1	16	2.24e-24	692	1-376 (380)	195-622 (692)
AF-A0A1D6HNV0-F1-model_v4	Zinc finger (C3HC4-type RING finger) family protein	Zea mays	1	16.4	1.18e-23	689	2-376 (380)	238-681 (739)
AF-A0A1D6HD96-F1-model_v4	Protein binding protein	Zea mays	1	17.1	1.98e-23	684	1-376 (380)	201-644 (696)
AF-Q6K937-F1-model_v4	Os02g0619600 protein	Oryza sativa Japonica Group	1	14.6	3.72e-23	683	3-376 (380)	210-652 (709)
AF-Q7XM95-F1-model_v4	Os04g0508800 protein	Oryza sativa Japonica Group	1	15.1	6.98e-23	676	1-376 (380)	217-662 (708)
AF-A0A0P0V5S3-F1-model_v4	Os01g0640200 protein	Oryza sativa Japonica Group	1	15.7	3.13e-23	670	5-380 (380)	33-442 (626)
AF-A0A1D6KTT0-F1-model_v4	Zinc finger (C3HC4-type RING finger) family protein	Zea mays	1	15.1	3.93e-23	670	1-376 (380)	131-572 (642)
AF-K7VA22-F1-model_v4	Zinc finger (C3HC4-type RING finger) family protein	Zea mays	1	13.1	4.36e-22	669	1-375 (380)	30-449 (499)
AF-F4IU12-F1-model_v4	Zinc finger (C3HC4-type RING finger) family protein	Arabidopsis thaliana	1	15.3	1.57e-23	668	2-376 (380)	200-640 (692)
AF-A0A1D6F4K8-F1-model_v4	Zinc finger (C3HC4-type RING finger) family protein	Zea mays	1	12.7	2.6e-22	662	1-376 (380)	30-451 (501)
AF-Q6ZFR3-F1-model_v4	Os08g0126100 protein	Oryza sativa Japonica Group	1	14	4.95e-23	662	2-376 (380)	186-623 (704)
AF-Q9LN03-F1-model_v4	T6D22.13	Arabidopsis thaliana	1	17.3	2.35e-23	660	1-376 (380)	159-592 (641)
AF-C0HF51-F1-model_v4	Zinc finger (C3HC4-type RING finger) family protein	Zea mays	1	17.5	4.17e-23	654	5-375 (380)	10-421 (459)
AF-A0A1D6JNC8-F1-model_v4	Zinc finger (C3HC4-type RING finger) family protein	Zea mays	1	13.8	8.28e-23	644	1-376 (380)	146-612 (748)
AF-A0A0P0XVD7-F1-model_v4	Os10g0464800 protein	Oryza sativa Japonica Group	1	14.6	1.74e-22	642	1-375 (380)	443-878 (949)
AF-Q9FF49-F1-model_v4	Retroelement pol polyprotein-like	Arabidopsis thaliana	1	16.2	3.72e-23	637	1-376 (380)	203-641 (704)
AF-A0A1D6KTS9-F1-model_v4	Zinc finger (C3HC4-type RING finger) family protein	Zea mays	1	15.6	1.39e-22	626	5-376 (380)	117-543 (628)
AF-B4FBK7-F1-model_v4	Zinc finger (C3HC4-type RING finger) family protein	Zea mays	1	13.9	1.03e-21	598	2-376 (380)	39-514 (650)
AF-A0A0P0XB69-F1-model_v4	Os08g0126000 protein	Oryza sativa Japonica Group	1	14.1	9.62e-21	590	1-376 (380)	279-711 (757)
AF-K0F6N4-F1-model_v4	VWFA domain-containing protein	Nocardia brasiliensis ATCC 700358	1	14.1	7.22e-21	554	8-352 (380)	1-376 (416)
AF-Q2QZH3-F1-model_v4	Os11g0687100 protein	Oryza sativa Japonica Group	1	13.8	1.59e-19	536	3-376 (380)	30-510 (633)
AF-A0A1D6LKL0-F1-model_v4	Zinc finger (C3HC4-type RING finger) family protein	Zea mays	1	12.9	9.96e-19	510	1-378 (380)	22-482 (551)
AF-A0A1D6LKK8-F1-model_v4	Zinc finger (C3HC4-type RING finger) family protein	Zea mays	1	12.5	3.32e-18	506	1-378 (380)	88-553 (665)
AF-A0A0P0Y4T9-F1-model_v4	Os11g0650600 protein	Oryza sativa Japonica Group	1	12.4	1.33e-18	503	3-373 (380)	20-435 (569)
AF-A0A1C1CLM8-F1-model_v4	U-box domain containing protein	Cladophialophora carrionii	1	15.9	5.25e-18	494	4-375 (380)	41-474 (748)
AF-A0A0P0WY66-F1-model_v4	Os06g0578100 protein	Oryza sativa Japonica Group	1	13.2	8.79e-18	487	3-376 (380)	9-487 (666)
AF-Q14624-F1-model_v4	Inter-alpha-trypsin inhibitor heavy chain H4	Homo sapiens	1	16.1	9.96e-19	474	10-332 (380)	249-579 (930)
AF-A0A0A2V2M6-F1-model_v4	VWFA domain-containing protein	Paracoccidioides lutzii Pb01	1	13.9	1.24e-17	470	4-376 (380)	41-479 (757)
AF-Q6UXX5-F1-model_v4	Inter-alpha-trypsin inhibitor heavy chain H6	Homo sapiens	1	16.2	7.92e-19	470	22-342 (380)	267-598 (1313)
AF-F1QTF9-F1-model_v4	Inter-alpha-trypsin inhibitor heavy chain 3a	Danio rerio	1	15.7	1.87e-18	464	8-324 (380)	263-598 (905)
AF-D3ZFH5-F1-model_v4	Inter-alpha-trypsin inhibitor heavy chain 2	Rattus norvegicus	1	18	1.65e-17	461	8-332 (380)	284-620 (826)
AF-A2AR69-F1-model_v4	Inter-alpha-trypsin inhibitor heavy chain family member 6	Danio rerio	1	19.1	6.99e-18	461	8-335 (380)	260-610 (860)
AF-I1L1R5-F1-model_v4	VWFA domain-containing protein	Glycine max	1	17.8	3.1e-17	456	3-335 (380)	292-617 (759)
AF-Q61703-F1-model_v4	Inter-alpha-trypsin inhibitor heavy chain H2	Mus musculus	1	18	4.9e-17	452	12-335 (380)	284-619 (946)
AF-A0A0D2GA85-F1-model_v4	Unplaced genomic scaffold supercont1.6, whole genome shotgun sequence	Fonsecaea pedrosoi CBS 271.37	1	14	4.08e-16	451	10-379 (380)	34-471 (751)
AF-E7FCH6-F1-model_v4	Inter-alpha-trypsin inhibitor heavy chain 1	Danio rerio	1	16.8	6.23e-18	450	10-324 (380)	250-579 (905)
AF-A0A0R4IU44-F1-model_v4	Inter-alpha-trypsin inhibitor heavy chain 3b	Danio rerio	1	18.7	1.11e-17	448	11-324 (380)	241-561 (892)
AF-Q8BJD1-F1-model_v4	Inter-alpha-trypsin inhibitor heavy chain H5	Mus musculus	1	18.1	6.6e-18	448	22-332 (380)	279-609 (952)
AF-Q5RH29-F1-model_v4	Inter-alpha-trypsin inhibitor heavy chain 2	Danio rerio	1	19.4	2.76e-17	446	10-332 (380)	277-611 (946)
AF-Q5EBC0-F1-model_v4	Inter alpha-trypsin inhibitor, heavy chain 4	Rattus norvegicus	1	17.2	2.61e-17	442	10-332 (380)	249-579 (933)
AF-Q61702-F1-model_v4	Inter-alpha-trypsin inhibitor heavy chain H1	Mus musculus	1	15.6	9.74e-17	440	22-332 (380)	273-594 (907)
AF-F1REM9-F1-model_v4	Inter-alpha-trypsin inhibitor heavy chain 5	Danio rerio	1	16.3	4.58e-16	438	8-324 (380)	290-621 (981)
AF-P19823-F1-model_v4	Inter-alpha-trypsin inhibitor heavy chain H2	Homo sapiens	1	17.8	3.28e-17	435	11-335 (380)	281-619 (946)
AF-Q86UX2-F1-model_v4	Inter-alpha-trypsin inhibitor heavy chain H5	Homo sapiens	1	17.8	3.68e-17	434	11-332 (380)	266-609 (942)
AF-A0A0R4IT72-F1-model_v4	Zgc:112265	Danio rerio	1	15.5	3.85e-16	431	10-332 (380)	245-564 (915)
AF-P19827-F1-model_v4	Inter-alpha-trypsin inhibitor heavy chain H1	Homo sapiens	1	15.4	1.45e-16	429	22-332 (380)	276-597 (911)
AF-Q61704-F1-model_v4	Inter-alpha-trypsin inhibitor heavy chain H3	Mus musculus	1	16.4	3.47e-17	424	22-324 (380)	268-588 (889)
AF-A0A1D6LKL2-F1-model_v4	Zinc finger (C3HC4-type RING finger) family protein	Zea mays	1	13.3	2.17e-16	422	1-378 (380)	53-513 (630)
AF-A6X935-F1-model_v4	Inter alpha-trypsin inhibitor, heavy chain 4	Mus musculus	1	17.4	8.3e-18	421	10-370 (380)	247-582 (942)
AF-A0A175WHE0-F1-model_v4	Protein STE5	Madurella mycetomatis	1	13.2	4.37e-17	417	38-327 (380)	621-988 (1161)
AF-F4IDC8-F1-model_v4	Inter alpha-trypsin inhibitor, heavy chain-like protein	Arabidopsis thaliana	1	14.8	3.24e-16	413	1-335 (380)	286-614 (756)
AF-C0NJD1-F1-model_v4	U-box domain-containing protein	Histoplasma capsulatum G186AR	1	12.1	2.05e-16	413	4-376 (380)	41-481 (759)
AF-K7M7W3-F1-model_v4	Uncharacterized protein	Glycine max	1	14	2.35e-18	409	4-362 (380)	244-626 (674)
AF-A0A0D2DKD4-F1-model_v4	Unplaced genomic scaffold supercont1.5, whole genome shotgun sequence	Fonsecaea pedrosoi CBS 271.37	1	13.6	1.37e-16	408	38-327 (380)	501-870 (1018)
AF-I1J4W4-F1-model_v4	Uncharacterized protein	Glycine max	1	14.3	2.79e-18	407	3-364 (380)	251-636 (680)
AF-A0A1D6J2X3-F1-model_v4	Zinc finger (C3HC4-type RING finger) family protein	Zea mays	1	13.1	7.32e-17	402	3-358 (380)	267-668 (737)
AF-Q63416-F1-model_v4	Inter-alpha-trypsin inhibitor heavy chain H3	Rattus norvegicus	1	16.9	2.58e-16	402	10-324 (380)	259-588 (887)
AF-I1JH43-F1-model_v4	Uncharacterized protein	Glycine max	1	13.7	7.32e-17	399	3-362 (380)	218-603 (651)
AF-A0A0R0GDN4-F1-model_v4	VWFA domain-containing protein	Glycine max	1	15.8	1.71e-15	398	3-335 (380)	65-403 (515)
AF-A0A0P0W5W4-F1-model_v4	Os04g0101800 protein	Oryza sativa Japonica Group	1	13.5	6.52e-17	395	3-358 (380)	237-628 (689)
AF-Q8L798-F1-model_v4	Inter-alpha-trypsin inhibitor heavy chain-like protein	Arabidopsis thaliana	1	18.2	1.09e-16	395	5-335 (380)	290-615 (754)
AF-A0A1D6K5E6-F1-model_v4	Inter-alpha-trypsin inhibitor heavy chain-related	Zea mays	1	17.9	5.07e-15	395	12-285 (380)	362-652 (881)
AF-A0A1C1C6G5-F1-model_v4	Uncharacterized protein	Cladophialophora carrionii	1	13.4	2.44e-16	395	38-327 (380)	634-1003 (1152)
AF-U7Q5N2-F1-model_v4	Uncharacterized protein	Sporothrix schenckii ATCC 58251	1	12.1	5.75e-16	394	38-331 (380)	440-813 (991)
AF-A0A1I9LN98-F1-model_v4	Zinc finger (C3HC4-type RING finger) family protein	Arabidopsis thaliana	1	14.7	7.66e-16	391	2-376 (380)	249-625 (682)
AF-I1MS95-F1-model_v4	VWFA domain-containing protein	Glycine max	1	17.8	2.44e-16	389	10-335 (380)	284-613 (754)
AF-Q9LTA6-F1-model_v4	E3 ubiquitin-protein ligase WAV3	Arabidopsis thaliana	1	12.2	2.58e-16	388	3-352 (380)	280-667 (740)
AF-I1LY70-F1-model_v4	VWFA domain-containing protein	Glycine max	1	16.5	8.11e-16	386	10-335 (380)	284-613 (754)
AF-B2RYM3-F1-model_v4	Inter-alpha trypsin inhibitor, heavy chain 1	Rattus norvegicus	1	14.2	4.58e-16	382	22-356 (380)	270-593 (904)
AF-I1L4W2-F1-model_v4	Uncharacterized protein	Glycine max	1	14.1	2.33e-17	381	3-364 (380)	116-501 (541)
AF-K7MEH7-F1-model_v4	VWFA domain-containing protein	Glycine max	1	16.4	3.06e-16	380	10-335 (380)	194-524 (665)
AF-K7KZK1-F1-model_v4	VWFA domain-containing protein	Glycine max	1	15.8	8.69e-17	380	10-352 (380)	285-614 (756)
AF-Q06033-F1-model_v4	Inter-alpha-trypsin inhibitor heavy chain H3	Homo sapiens	1	16	2.28e-15	380	22-324 (380)	268-588 (890)
AF-C1HBZ8-F1-model_v4	von Willebrand and RING finger domain-containing protein	Paracoccidioides lutzii Pb01	1	12.9	6.45e-16	379	38-327 (380)	715-1086 (1298)
AF-A0A1D6F1B1-F1-model_v4	Inter-alpha-trypsin inhibitor heavy chain-related	Zea mays	1	21.4	5.37e-15	378	8-335 (380)	293-618 (669)
AF-C0NY70-F1-model_v4	von Willebrand RING finger domain-containing protein	Histoplasma capsulatum G186AR	1	13.3	1.21e-15	378	38-333 (380)	517-891 (1057)
AF-B7FA66-F1-model_v4	Os06g0578700 protein	Oryza sativa Japonica Group	1	12	1.01e-14	372	1-376 (380)	31-473 (582)
AF-Q2QZH2-F1-model_v4	Expressed protein	Oryza sativa Japonica Group	1	12	1.87e-13	372	1-378 (380)	30-484 (598)
AF-P76481-F1-model_v4	Uncharacterized protein YfbK	Escherichia coli K-12	1	15.8	1.03e-16	370	1-348 (380)	178-574 (575)
AF-Q54MG1-F1-model_v4	von Willebrand factor A domain-containing protein DDB_G0285981	Dictyostelium discoideum	1	15.2	2.46e-17	368	6-335 (380)	275-601 (831)
AF-Q9ZQ46-F1-model_v4	E3 ubiquitin-protein ligase WAVH1	Arabidopsis thaliana	1	14.7	4.32e-16	366	3-358 (380)	258-637 (683)
AF-Q8ZNE5-F1-model_v4	Putative von Willebrand factor, vWF type A domain protein	Salmonella enterica subsp. enterica serovar Typhimurium str. LT2	1	16.2	5.13e-16	365	1-374 (380)	195-591 (593)
AF-Q75J93-F1-model_v4	Circularly permutated Ras protein 1	Dictyostelium discoideum	1	12.1	4.47e-14	362	28-379 (380)	358-816 (842)
AF-A0A1D6IJH6-F1-model_v4	Inter-alpha-trypsin inhibitor heavy chain-related	Zea mays	1	15.5	3.21e-15	361	12-371 (380)	291-643 (775)
AF-A0A175W520-F1-model_v4	Inter-alpha-trypsin inhibitor heavy chain H3	Madurella mycetomatis	1	15	5.37e-15	359	2-313 (380)	30-370 (749)
AF-I1J6W3-F1-model_v4	Uncharacterized protein	Glycine max	1	14	1.09e-16	352	2-358 (380)	237-599 (648)
AF-U7PS73-F1-model_v4	VWFA domain-containing protein	Sporothrix schenckii ATCC 58251	1	15.3	2.36e-13	344	34-374 (380)	32-446 (700)
AF-X8FGN6-F1-model_v4	von Willebrand factor type A domain protein	Mycobacterium ulcerans str. Harvey	1	16.9	4.18e-13	344	3-284 (380)	270-549 (770)
AF-Q54DU5-F1-model_v4	von Willebrand factor A domain-containing protein DDB_G0292028	Dictyostelium discoideum	1	17.6	3.6e-15	341	6-334 (380)	306-627 (932)
AF-A0A1D6EG40-F1-model_v4	Zinc finger (C3HC4-type RING finger) family protein	Zea mays	1	12.2	1.07e-14	340	3-358 (380)	271-674 (750)
AF-F4JSV3-F1-model_v4	Probable E3 ubiquitin-protein ligase EDA40	Arabidopsis thaliana	1	12.3	4.08e-16	337	3-358 (380)	317-687 (739)
AF-Q54MG4-F1-model_v4	von Willebrand factor A domain-containing protein DDB_G0285975	Dictyostelium discoideum	1	15.6	5.43e-16	337	6-332 (380)	302-625 (917)
AF-Q54SU8-F1-model_v4	VWFA domain-containing protein	Dictyostelium discoideum	1	11.8	7.08e-14	335	38-380 (380)	229-684 (698)
AF-Q9CBL9-F1-model_v4	UPF0353 protein ML1808	Mycobacterium leprae TN	1	11.7	2.28e-10	332	31-199 (380)	90-293 (335)
AF-O00534-F1-model_v4	von Willebrand factor A domain-containing protein 5A	Homo sapiens	1	17	3e-14	332	4-300 (380)	239-552 (786)
AF-Q55G98-F1-model_v4	von Willebrand factor A domain-containing protein DDB_G0267758	Dictyostelium discoideum	1	14.2	1.71e-15	332	5-285 (380)	280-599 (878)
AF-Q54CQ8-F1-model_v4	von Willebrand factor A domain-containing protein DDB_G0292740	Dictyostelium discoideum	1	13.6	1.3e-16	332	8-345 (380)	279-650 (910)
AF-Q54DV3-F1-model_v4	von Willebrand factor A domain-containing protein DDB_G0292016	Dictyostelium discoideum	1	13.5	1.52e-15	332	5-335 (380)	261-599 (918)
AF-E7FAF7-F1-model_v4	Si:dkey-9k7.3	Danio rerio	1	12.8	8.4e-14	328	16-372 (380)	142-632 (648)
AF-A0A3Q0KV65-F1-model_v4	Putative vacuolar protein sorting 26, vps26	Schistosoma mansoni	1	17.1	2.03e-15	327	4-332 (380)	213-566 (786)
AF-X1WBG8-F1-model_v4	Si:ch73-265h17.1	Danio rerio	1	16.3	1.07e-14	317	4-332 (380)	235-575 (611)
AF-Q8IB60-F1-model_v4	Protein transport protein SEC23	Plasmodium falciparum 3D7	1	10.3	2.2e-12	314	29-380 (380)	116-601 (759)
AF-A0A2R8RUY6-F1-model_v4	Poly [ADP-ribose] polymerase	Danio rerio	1	16.1	1.49e-13	314	6-304 (380)	840-1142 (1795)
AF-P21941-F1-model_v4	Cartilage matrix protein	Homo sapiens	1	19	8.03e-10	313	32-203 (380)	35-221 (496)
AF-E7FFM8-F1-model_v4	von Willebrand factor A domain-containing 5A	Danio rerio	1	16.9	2.36e-13	312	4-288 (380)	234-542 (804)
AF-A0A1D6NW03-F1-model_v4	Zinc finger (C3HC4-type RING finger) family protein	Zea mays	1	13.3	1.46e-11	311	4-378 (380)	51-482 (602)
AF-Q0WQX9-F1-model_v4	Probable E3 ubiquitin-protein ligase WAVH2	Arabidopsis thaliana	1	13.6	8.59e-16	310	3-355 (380)	279-665 (717)
AF-D3ZP60-F1-model_v4	Uncharacterized protein RGD1308559_predicted	Rattus norvegicus	1	16.7	7.33e-12	310	21-247 (380)	330-567 (1216)
AF-Q5XI24-F1-model_v4	Matrilin 1	Rattus norvegicus	1	19.5	1.69e-09	308	34-202 (380)	38-220 (498)
AF-A9Z1V5-F1-model_v4	von Willebrand factor A domain-containing protein 5B1	Mus musculus	1	16.4	8.7e-12	307	21-247 (380)	330-567 (1215)
AF-O35701-F1-model_v4	Matrilin-3	Mus musculus	1	17.3	3.77e-09	306	34-199 (380)	73-252 (481)
AF-A0A368UHZ2-F1-model_v4	Uncharacterized protein	Glycine max	1	10.8	3.6e-15	306	20-358 (380)	179-531 (581)
AF-D4A1U8-F1-model_v4	Similar to RIKEN cDNA 5830475I06	Rattus norvegicus	1	15.6	6.61e-13	306	2-300 (380)	239-552 (798)
AF-O00339-F1-model_v4	Matrilin-2	Homo sapiens	1	15.7	2.25e-09	306	36-197 (380)	54-229 (956)
AF-P9WFJ7-F1-model_v4	UPF0353 protein Rv1481	Mycobacterium tuberculosis H37Rv	1	12.8	6.77e-10	305	31-201 (380)	90-298 (335)
AF-A6H584-F1-model_v4	Collagen alpha-5(VI) chain	Mus musculus	1	19.4	5.03e-09	305	36-202 (380)	471-646 (2640)
AF-P51942-F1-model_v4	Cartilage matrix protein	Mus musculus	1	19.5	2.83e-09	304	34-202 (380)	40-222 (500)
AF-A8TX70-F1-model_v4	Collagen alpha-5(VI) chain	Homo sapiens	1	21.6	3.77e-09	303	36-202 (380)	439-614 (2615)
AF-O95460-F1-model_v4	Matrilin-4	Homo sapiens	1	17.2	4.23e-09	301	34-199 (380)	30-208 (622)
AF-C7G046-F1-model_v4	von Willebrand factor A domain-containing protein DDB_G0286969	Dictyostelium discoideum	1	16.1	2.1e-13	301	13-332 (380)	314-641 (2079)
AF-D3ZMS3-F1-model_v4	Matrilin 4	Rattus norvegicus	1	16.3	3.18e-09	299	36-199 (380)	33-210 (624)
AF-Q57X62-F1-model_v4	VWFA domain-containing protein	Trypanosoma brucei brucei TREU927	1	13	9.87e-13	299	5-305 (380)	264-585 (842)
AF-Q21540-F1-model_v4	Cuticlin-6	Caenorhabditis elegans	1	16.8	1.77e-13	296	36-285 (380)	44-333 (572)
AF-E9PYK3-F1-model_v4	Protein mono-ADP-ribosyltransferase PARP4	Mus musculus	1	17	5.89e-13	296	6-304 (380)	833-1130 (1969)
AF-Q8BGF0-F1-model_v4	Expressed sequence AW551984	Mus musculus	1	15.2	1.24e-12	295	6-300 (380)	239-552 (804)
AF-C0P6N8-F1-model_v4	Sec23/sec24 transport family protein	Zea mays	1	11.3	1.87e-13	292	36-378 (380)	122-612 (747)
AF-A2AX52-F1-model_v4	Collagen alpha-4(VI) chain	Mus musculus	1	22.5	9.99e-09	292	36-202 (380)	846-1016 (2309)
AF-A0A0G2JYF9-F1-model_v4	Matrilin 3	Rattus norvegicus	1	16.8	8.91e-09	291	34-199 (380)	73-252 (463)
AF-F1LXS3-F1-model_v4	Matrilin 2	Rattus norvegicus	1	17.2	1.06e-08	291	36-197 (380)	53-228 (941)
AF-A0A0B4K5Z8-F1-model_v4	Protein transport protein SEC23	Drosophila melanogaster	1	10.7	4.85e-11	289	33-380 (380)	124-618 (781)
AF-P24043-F2-model_v4	Laminin subunit alpha-2	Homo sapiens	1	18.8	5.97e-09	289	38-198 (380)	1090-1262 (1400)
AF-O89029-F1-model_v4	Matrilin-4	Mus musculus	1	16.4	6.32e-09	288	38-199 (380)	35-210 (624)
AF-A0A0B4K866-F1-model_v4	Straightjacket, isoform C	Drosophila melanogaster	1	20.9	6.32e-09	287	34-199 (380)	263-447 (1271)
AF-A0A2R8QMR3-F1-model_v4	Calcium channel, voltage-dependent, alpha 2/delta subunit 4a	Danio rerio	1	15.5	3.64e-11	286	34-248 (380)	222-469 (483)
AF-A0A077ZDI4-F1-model_v4	Voltage dependent calcium channel unc 36	Trichuris trichiura	1	19	3.44e-11	286	39-248 (380)	277-507 (1153)
AF-F1QH95-F1-model_v4	Matrilin 3a	Danio rerio	1	17.4	5.97e-09	285	34-199 (380)	59-238 (460)
AF-Q19371-F1-model_v4	Yeast SEC homolog	Caenorhabditis elegans	1	12.1	6.17e-12	285	26-371 (380)	517-962 (1126)
AF-Q54J12-F1-model_v4	Uncharacterized protein	Dictyostelium discoideum	1	21.4	1.58e-08	284	37-197 (380)	120-308 (549)
AF-A0A0P0Y9Y8-F1-model_v4	Os12g0430000 protein	Oryza sativa Japonica Group	1	12.2	2.96e-13	284	28-325 (380)	495-873 (1095)
AF-Q5TIE3-F1-model_v4	von Willebrand factor A domain-containing protein 5B1	Homo sapiens	1	17.3	1.63e-11	284	21-248 (380)	338-576 (1220)
AF-Q9UKK3-F1-model_v4	Protein mono-ADP-ribosyltransferase PARP4	Homo sapiens	1	15.5	3.48e-12	283	6-304 (380)	840-1137 (1724)
AF-Q7SZE5-F1-model_v4	Protein transport protein Sec23A	Danio rerio	1	10.7	2.74e-11	282	28-380 (380)	120-610 (765)
AF-O08746-F1-model_v4	Matrilin-2	Mus musculus	1	17.2	2.1e-08	282	36-197 (380)	54-229 (956)
AF-A0A0R4IHR3-F1-model_v4	von Willebrand factor A domain-containing 5B2	Danio rerio	1	16.2	5.14e-11	282	19-248 (380)	345-587 (1132)
AF-A6NMZ7-F1-model_v4	Collagen alpha-6(VI) chain	Homo sapiens	1	21.1	3.33e-08	282	36-202 (380)	433-608 (2263)
AF-A0A3P7E8C2-F1-model_v4	Uncharacterized protein	Wuchereria bancrofti	1	19.7	2.83e-09	281	33-201 (380)	396-573 (577)
AF-Q7X6L6-F1-model_v4	Os04g0412900 protein	Oryza sativa Japonica Group	1	11.7	3.52e-13	281	33-325 (380)	118-525 (739)
AF-A0A077ZEA9-F1-model_v4	Protein transport protein SEC23	Trichuris trichiura	1	9.5	1.23e-11	281	33-378 (380)	127-629 (776)
AF-G3X972-F1-model_v4	Sec24-related gene family, member C (S. cerevisiae)	Mus musculus	1	10.9	4.13e-12	281	33-375 (380)	499-938 (1096)
AF-I1LRH3-F1-model_v4	Uncharacterized protein	Glycine max	1	11.7	7e-13	280	36-331 (380)	120-536 (747)
AF-A0A1D6EGS2-F1-model_v4	Protein transport protein Sec24-like CEF	Zea mays	1	11.5	2.61e-12	280	33-333 (380)	494-869 (1105)

## Sheet: AFDB50 database
AF2 models	Description	Organism	Prob.	Sequence Id.	E-value	Score	Query Position	Target Position
AF-A0A537E960-F1-model_v4	VWA domain-containing protein	Candidatus Bathyarchaeota archaeon	1	41.4	9.24e-48	1782	1-381 (381)	1-379 (379)
AF-A0A843HYU3-F1-model_v4	VWA domain-containing protein	Sulfolobus sp.	1	58.9	6.8e-46	1742	1-293 (381)	1-295 (296)
AF-A0A0P0N253-F1-model_v4	VWFA domain-containing protein	Pyrodictium delaneyi	1	36.3	2.07e-44	1670	1-381 (381)	1-391 (391)
AF-A0A088E247-F1-model_v4	von Willebrand factor, type A	Metallosphaera sedula	1	31.2	1.49e-39	1397	1-380 (381)	1-394 (394)
AF-A0A6A9QKX9-F1-model_v4	VWA domain-containing protein	Sulfuracidifex metallicus DSM 6482 = JCM 9184	1	29.4	5.32e-35	1210	1-381 (381)	1-359 (359)
AF-A0A0U2Y6V3-F1-model_v4	VWFA domain-containing protein	Sulfolobus acidocaldarius	1	30.6	6.69e-34	1193	1-380 (381)	1-360 (360)
AF-A0A1C8ZQ58-F1-model_v4	VWFA domain-containing protein	Sulfolobus sp. A20	1	31.4	1.63e-34	1177	1-380 (381)	1-356 (356)
AF-A0A537ESM9-F1-model_v4	VWA domain-containing protein	Candidatus Bathyarchaeota archaeon	1	43.1	5.91e-33	1141	50-379 (381)	1-328 (330)
AF-A0A157T028-F1-model_v4	von Willebrand factor type A	Saccharolobus solfataricus	1	29.9	1.14e-33	1123	2-380 (381)	82-436 (436)
AF-A0A843HWR4-F1-model_v4	VWA domain-containing protein	Sulfolobus sp.	1	27.6	3.22e-30	998	1-379 (381)	1-352 (355)
AF-A0A5C5WBF7-F1-model_v4	von Willebrand factor type A domain protein	Thalassoglobus neptunius	1	22.3	3.22e-30	916	1-374 (381)	26-435 (462)
AF-A0A7T0G0B3-F1-model_v4	VWA domain-containing protein	Candidatus Nitronauta litoralis	1	20	4.29e-29	895	1-379 (381)	27-457 (461)
AF-A0A2A2W7C6-F1-model_v4	VWFA domain-containing protein	Rhodopirellula sp. SM50	1	18.8	2.12e-29	892	2-380 (381)	13-432 (446)
AF-A0A6I0EE66-F1-model_v4	VWA domain-containing protein	Hyphomicrobium sp.	1	18.5	4.02e-28	889	1-381 (381)	25-450 (452)
AF-A0A2E5ENL1-F1-model_v4	VWFA domain-containing protein	Verrucomicrobiales bacterium	1	19.1	1.57e-28	888	1-380 (381)	31-443 (482)
AF-Q3A188-F1-model_v4	VWFA superfamily protein	Syntrophotalea carbinolica DSM 2380	1	21.1	8.76e-30	881	1-379 (381)	25-436 (442)
AF-A0A524HGY9-F1-model_v4	VWA domain-containing protein	Candidatus Brocadiae bacterium	1	19.3	2.98e-27	879	2-379 (381)	25-435 (438)
AF-A0A4Y6Q0W9-F1-model_v4	VWA domain-containing protein	Persicimonas caeni	1	19.3	5.73e-28	878	1-380 (381)	42-462 (466)
AF-A0A1H9Z764-F1-model_v4	Ca-activated chloride channel family protein	Thorsellia anophelis DSM 18579	1	18.2	1.48e-28	876	1-380 (381)	34-461 (461)
AF-E0SSR8-F1-model_v4	von Willebrand factor type A	Ignisphaera aggregans DSM 17230	1	22.4	4.53e-28	875	1-380 (381)	1-407 (411)
AF-A0A5J4DU14-F1-model_v4	VWFA domain-containing protein	bacterium MnTg02	1	19.3	1.49e-29	873	2-376 (381)	55-462 (469)
AF-A0A7C5UI77-F1-model_v4	VWA domain-containing protein	Armatimonadetes bacterium	1	20.9	1.66e-28	865	2-375 (381)	106-507 (513)
AF-A0A3B9C0K4-F1-model_v4	VWFA domain-containing protein	Chitinophagaceae bacterium	1	17.3	1.15e-26	856	1-380 (381)	13-431 (434)
AF-A0A1N6VPA4-F1-model_v4	Ca-activated chloride channel family protein	Marinobacterium stanieri	1	17.5	9.12e-27	848	3-379 (381)	28-438 (442)
AF-A0A5S9F3Z5-F1-model_v4	VWFA domain-containing protein	Candidatus Uabimicrobium amorphum	1	19.3	6.4e-27	835	2-380 (381)	75-485 (509)
AF-A0A5C5WTM7-F1-model_v4	von Willebrand factor type A domain protein	Rubripirellula amarantea	1	17.9	6.83e-28	833	2-377 (381)	58-476 (501)
AF-A0A5R8KK59-F1-model_v4	VWA domain-containing protein	Phragmitibacter flavus	1	18	3.16e-27	832	3-375 (381)	27-437 (444)
AF-G0EEA8-F1-model_v4	von Willebrand factor type A	Pyrolobus fumarii 1A	1	21.7	2.81e-27	824	2-375 (381)	11-407 (426)
AF-A0A644VYW8-F1-model_v4	VWFA domain-containing protein	bioreactor metagenome	1	16.9	2.98e-27	813	1-377 (381)	33-451 (465)
AF-A0A7Y2ZCA9-F1-model_v4	VWA domain-containing protein	Desulfofustis sp.	1	20.2	7.2e-27	813	1-379 (381)	39-465 (468)
AF-A0A3E0N5H3-F1-model_v4	VWA domain-containing protein	Planctomycetota bacterium	1	19	3.35e-27	808	2-379 (381)	54-463 (473)
AF-A0A2G6FDW5-F1-model_v4	VWFA domain-containing protein	Desulfobulbus propionicus	1	17.3	1.02e-25	807	2-381 (381)	94-521 (522)
AF-A0A832GJQ1-F1-model_v4	VWA domain-containing protein	Armatimonadetes bacterium	1	21	7.64e-27	803	6-375 (381)	2-399 (405)
AF-A0A2U3CH16-F1-model_v4	VWFA domain-containing protein	Candidatus Heimdallarchaeota archaeon B3_Heim	1	18.3	1.08e-25	803	2-381 (381)	15-432 (433)
AF-A0A7C3MVD1-F1-model_v4	VWA domain-containing protein	Armatimonadetes bacterium	1	18.4	2.08e-26	801	3-375 (381)	33-435 (439)
AF-A0A249KC74-F1-model_v4	Ca-activated chloride channel homolog	Candidatus Planktophila dulcis	1	16	1.29e-25	798	4-381 (381)	2-426 (436)
AF-A0A5C2HNB8-F1-model_v4	VWA domain-containing protein	Ectothiorhodospiraceae bacterium BW-2	1	18.4	9.61e-26	797	1-381 (381)	24-448 (518)
AF-A0A2P7TEE7-F1-model_v4	VWA domain-containing protein	Sphingobacteriales bacterium UPWRP_1	1	13.8	3.75e-26	794	1-377 (381)	29-452 (454)
AF-A0A2D6K9P7-F1-model_v4	VWFA domain-containing protein	Acidiferrobacteraceae bacterium	1	15.5	3.31e-25	784	1-380 (381)	34-452 (523)
AF-A0A4Y6Q1K0-F1-model_v4	VWA domain-containing protein	Persicimonas caeni	1	18.2	8e-25	783	1-379 (381)	59-477 (482)
AF-A0A1M5EIA9-F1-model_v4	Ca-activated chloride channel family protein	Dysgonomonas macrotermitis	1	16	2.77e-25	781	1-379 (381)	43-460 (464)
AF-A0A7Y5Q7H6-F1-model_v4	VWA domain-containing protein	Armatimonadetes bacterium	1	18.2	2.07e-25	780	1-371 (381)	2-416 (423)
AF-A0A6L5FKP0-F1-model_v4	VWA domain-containing protein	Hyphomicrobiales bacterium	1	16.4	2.94e-25	778	1-379 (381)	94-513 (518)
AF-A0A0F6YJH9-F1-model_v4	VWFA domain-containing protein	Sandaracinus amylolyticus	1	19.1	4.77e-27	776	2-381 (381)	32-459 (460)
AF-A0A1G2VUD8-F1-model_v4	VWFA domain-containing protein	Desulfuromonadaceae bacterium GWC2_58_13	1	21.5	1.22e-25	774	1-300 (381)	28-357 (361)
AF-A0A7Y4HIL7-F1-model_v4	VWA domain-containing protein	Myxococcus xanthus	1	18.2	4.21e-26	774	1-381 (381)	64-475 (478)
AF-A0A7V9ALR3-F1-model_v4	VWA domain-containing protein	Chloroflexia bacterium	1	16.6	2.46e-25	772	1-381 (381)	5-435 (437)
AF-A0A0K1Q7H9-F1-model_v4	VWFA domain-containing protein	Labilithrix luteola	1	17.7	4.19e-25	772	5-378 (381)	69-488 (490)
AF-A0A7Y4T600-F1-model_v4	VWA domain-containing protein	Alphaproteobacteria bacterium	1	14.1	2.32e-25	771	1-380 (381)	7-431 (502)
AF-A0A2T6DAK0-F1-model_v4	VWFA domain-containing protein	Verrucomicrobia bacterium LW23	1	19.5	1.09e-26	767	1-375 (381)	36-459 (462)
AF-A0A1W1H527-F1-model_v4	Putative von Willebrand factor type A	Desulfamplus magnetovallimortis	1	16.8	4.74e-26	766	2-381 (381)	6-417 (419)
AF-A0A7X8UJD2-F1-model_v4	VWA domain-containing protein	Actinomycetia bacterium	1	18.4	5.33e-26	765	1-379 (381)	9-412 (430)
AF-A0A7T9KCA3-F1-model_v4	VWA domain-containing protein	Chlorobi bacterium	1	16.5	4.68e-24	765	1-381 (381)	27-446 (446)
AF-A0A0K6SB81-F1-model_v4	VWFA domain-containing protein	Chromera velia CCMP2878	1	16.6	1.63e-25	765	2-379 (381)	1-461 (666)
AF-A0A6J4I205-F1-model_v4	VWFA domain-containing protein	uncultured Armatimonadetes bacterium	1	18.4	5.03e-26	764	2-375 (381)	47-451 (456)
AF-A0A4V0YZ65-F1-model_v4	VWA domain-containing protein	Ktedonosporobacter rubrisoli	1	16.2	1.14e-24	761	2-379 (381)	55-472 (482)
AF-A0A7Y3GYZ2-F1-model_v4	VWA domain-containing protein	Myxococcales bacterium	1	16.4	2.77e-25	758	3-379 (381)	46-464 (469)
AF-K9TCE8-F1-model_v4	Uncharacterized protein containing a von Willebrand factor type A (VWA) domain	Oscillatoria acuminata PCC 6304	1	16.6	1.84e-25	753	2-373 (381)	1-404 (405)
AF-A0A7T9DU73-F1-model_v4	VWA domain-containing protein	Sphingobacteriales bacterium	1	17	2.94e-25	752	1-379 (381)	57-482 (484)
AF-Q1DFU7-F1-model_v4	von Willebrand factor type A domain protein	Myxococcus xanthus DK 1622	1	18.5	1.08e-25	751	5-379 (381)	12-417 (422)
AF-A0A2U8E6K1-F1-model_v4	VWFA domain-containing protein	Ereboglobus luteus	1	20.6	2.08e-26	751	3-380 (381)	41-457 (476)
AF-A0A1L6LYQ3-F1-model_v4	VWFA domain-containing protein	Minicystis rosea	1	18.7	6.75e-26	749	5-375 (381)	63-483 (485)
AF-A0A1W9UMT7-F1-model_v4	Uncharacterized protein	Anaerolineaceae bacterium 4572_32.1	1	16.9	1.15e-26	749	1-372 (381)	80-481 (493)
AF-A0A1F9FI71-F1-model_v4	VWFA domain-containing protein	Deltaproteobacteria bacterium RBG_16_71_12	1	17.6	9.55e-25	747	2-379 (381)	55-470 (471)
AF-A0A3M1QH61-F1-model_v4	VWA domain-containing protein	Chloroflexi bacterium	1	17.2	2.34e-26	746	2-381 (381)	81-495 (497)
AF-A0A2W5UZM9-F1-model_v4	VWA domain-containing protein	Archangium gephyra	1	18.6	3.95e-25	745	2-379 (381)	47-464 (470)
AF-A0A7X9ITD1-F1-model_v4	VWA domain-containing protein	Myxococcales bacterium	1	18.4	5.96e-25	744	1-381 (381)	19-434 (507)
AF-A0A1J5DUM9-F1-model_v4	VWFA domain-containing protein	Deltaproteobacteria bacterium CG2_30_63_29	1	20.5	3.97e-26	742	3-375 (381)	74-497 (499)
AF-A0A7Y5NWQ9-F1-model_v4	VWA domain-containing protein	Polyangiaceae bacterium	1	14.2	7.12e-25	739	1-380 (381)	58-503 (503)
AF-A0A832Z5K1-F1-model_v4	VWA domain-containing protein	Pyrodictium sp.	1	25.1	3.75e-26	738	2-301 (381)	28-358 (363)
AF-A0A7C5GXI6-F1-model_v4	VWA domain-containing protein	Chloroflexi bacterium	1	20.8	2.96e-26	737	1-372 (381)	2-407 (419)
AF-A0A2W5VEP6-F1-model_v4	VWA domain-containing protein	Archangium gephyra	1	18.5	7.16e-26	736	2-381 (381)	57-478 (478)
AF-A0A3N5Q0Y5-F1-model_v4	VWA domain-containing protein	Chloroflexi bacterium	1	19.6	1.55e-26	733	3-378 (381)	5-415 (417)
AF-A0A7C7V8T7-F1-model_v4	VWA domain-containing protein	Anaerolineales bacterium	1	20.6	1.84e-25	732	2-375 (381)	86-495 (507)
AF-A0A847F713-F1-model_v4	VWA domain-containing protein	Sandaracinaceae bacterium	1	20.8	3.95e-25	724	2-381 (381)	29-444 (444)
AF-A0A2P6Q6X2-F1-model_v4	Putative chromatin regulator PHD family	Rosa chinensis	1	16.5	3.92e-24	724	1-379 (381)	244-673 (762)
AF-A0A0K1Q802-F1-model_v4	Mg-chelatase subunit ChlI and Chld (MoxR-like ATPase and vWF domain)	Labilithrix luteola	1	15.1	3.49e-24	721	1-379 (381)	58-503 (504)
AF-A0A3D5H796-F1-model_v4	VWFA domain-containing protein	Bacteroidetes bacterium	1	17	8.44e-24	719	3-379 (381)	48-460 (462)
AF-A0A803MHG1-F1-model_v4	VWFA domain-containing protein	Chenopodium quinoa	1	19.4	1.08e-25	717	1-376 (381)	82-512 (571)
AF-A0A2T0RJC6-F1-model_v4	Secreted protein with Ig-like and vWFA domain	Aliiruegeria haliotis	1	17.5	1.95e-25	711	1-381 (381)	5-428 (445)
AF-A0A2N2IRG3-F1-model_v4	VWFA domain-containing protein	Deltaproteobacteria bacterium HGW-Deltaproteobacteria-20	1	17.9	7.12e-25	709	2-375 (381)	251-688 (692)
AF-A0A7C5AQF9-F1-model_v4	VWA domain-containing protein	Anaerolineae bacterium	1	18.4	5e-25	706	3-378 (381)	5-413 (424)
AF-A0A4P2R748-F1-model_v4	VWFA domain-containing protein	Sorangium cellulosum	1	16.1	2.6e-24	706	1-379 (381)	139-583 (583)
AF-A0A2D9TBX6-F1-model_v4	VWFA domain-containing protein	Sandaracinus sp.	1	18.1	1.07e-23	705	3-380 (381)	85-497 (500)
AF-A0A2N2IUG1-F1-model_v4	VWFA domain-containing protein	Deltaproteobacteria bacterium HGW-Deltaproteobacteria-20	1	16.6	9.55e-25	705	2-379 (381)	250-693 (693)
AF-A0A255Z478-F1-model_v4	VWFA domain-containing protein	Sandarakinorhabdus cyanobacteriorum	1	18.4	1.28e-24	702	2-379 (381)	5-419 (440)
AF-A0A848YWQ7-F1-model_v4	VWA domain-containing protein	Desulfobacteraceae bacterium	1	17.3	1.27e-23	702	1-380 (381)	49-476 (479)
AF-A0A1L8D1X3-F1-model_v4	VWFA domain-containing protein	Carboxydothermus islandicus	1	17.5	4.97e-24	701	1-381 (381)	1-414 (414)
AF-A0A087GXW8-F1-model_v4	Uncharacterized protein	Arabis alpina	1	17.2	3.1e-24	701	1-376 (381)	196-613 (674)
AF-A0A1I1AHP2-F1-model_v4	Ca-activated chloride channel family protein	Cellulomonas marina	1	14.9	1.27e-23	700	2-381 (381)	5-411 (428)
AF-A0A3M1I1I8-F1-model_v4	Anti-sigma factor antagonist	Candidatus Hydrogenedentes bacterium	1	16.7	1.62e-24	700	4-381 (381)	2-405 (526)
AF-A0A3L6EY51-F1-model_v4	Uncharacterized protein sll0103	Zea mays	1	17.4	3.49e-24	696	2-376 (381)	87-525 (579)
AF-A0A1R2AX87-F1-model_v4	VWFA domain-containing protein	Stentor coeruleus	1	15.2	2.94e-25	695	1-379 (381)	28-446 (474)
AF-A0A2U1KZG5-F1-model_v4	Zinc finger (C3HC4-type RING finger) family protein	Artemisia annua	1	16.1	2.3e-23	695	2-379 (381)	92-500 (536)
AF-A0A830FGZ8-F1-model_v4	Uncharacterized protein	Haloarcula salaria	1	18.8	4.16e-24	693	1-367 (381)	1-384 (394)
AF-A0A3M1BIJ9-F1-model_v4	VWA domain-containing protein	Anaerolineae bacterium	1	16.9	4.44e-25	693	3-375 (381)	80-483 (489)
AF-A0A1R2B5K2-F1-model_v4	VWFA domain-containing protein	Stentor coeruleus	1	15	5.96e-25	693	3-378 (381)	124-538 (624)
AF-A0A4P8XGV6-F1-model_v4	von Willebrand factor type A	Paenibacillus algicola	1	14.6	1.2e-23	691	1-377 (381)	3-414 (415)
AF-A0A150RU06-F1-model_v4	VWFA domain-containing protein	Sorangium cellulosum	1	17.1	6.29e-24	691	1-380 (381)	67-465 (465)
AF-A9F1H2-F1-model_v4	VWFA domain-containing protein	Sorangium cellulosum So ce56	1	17.6	4.68e-24	691	4-376 (381)	1-404 (607)
AF-A0A7Y4IJL3-F1-model_v4	VWA domain-containing protein	Myxococcus xanthus	1	17.9	3.95e-25	690	2-381 (381)	14-432 (433)
AF-A0A2M9ZRC1-F1-model_v4	Anti-sigma factor antagonist	Leptospira perolatii	1	15.5	1.43e-23	690	4-381 (381)	2-411 (534)
AF-A0A7C2KD07-F1-model_v4	VWA domain-containing protein	Chloroflexi bacterium	1	17.7	1.01e-24	690	3-375 (381)	139-540 (549)
AF-A0A0D3FDN3-F1-model_v4	Uncharacterized protein	Oryza barthii	1	17	6.67e-24	688	2-376 (381)	159-581 (649)
AF-A0A0D2UFC3-F1-model_v4	VWFA domain-containing protein	Capsaspora owczarzaki ATCC 30864	1	13.9	2.04e-23	686	2-381 (381)	5-480 (501)
AF-A0A7V8VXT6-F1-model_v4	VWA domain-containing protein	Chloroflexia bacterium	1	15.9	1.19e-22	684	3-379 (381)	16-428 (437)
AF-A0A4Q5P0Z8-F1-model_v4	VWA domain-containing protein	bacterium	1	16.1	1.07e-23	684	2-380 (381)	53-460 (463)
AF-A9AXC5-F1-model_v4	von Willebrand factor type A	Herpetosiphon aurantiacus DSM 785	1	15.7	4.94e-23	683	2-375 (381)	3-452 (455)
AF-A0A7V3MAG4-F1-model_v4	VWA domain-containing protein	Anaerolineae bacterium	1	18.2	3.7e-24	682	2-371 (381)	88-479 (490)
AF-A0A833QKL2-F1-model_v4	von Willebrand factor type A domain-containing protein	Carex littledalei	1	15.9	2.18e-24	682	1-379 (381)	113-547 (600)
AF-A0A1X7VRQ2-F1-model_v4	VWFA domain-containing protein	Amphimedon queenslandica	1	15.2	6.29e-24	681	2-379 (381)	7-424 (455)
AF-A0A7S1WNQ9-F1-model_v4	Hypothetical protein	Alexandrium catenella	1	15.2	1.71e-23	679	3-379 (381)	119-542 (574)
AF-A0A2E0TAI7-F1-model_v4	VWFA domain-containing protein	Sandaracinus sp.	1	15.4	1.52e-23	679	2-379 (381)	243-688 (688)
AF-A0A7X1H082-F1-model_v4	VWA domain-containing protein	Desulfobacteraceae bacterium	1	18.9	4.39e-23	678	2-381 (381)	44-471 (472)
AF-A0A2A2PZB5-F1-model_v4	VWFA domain-containing protein	Verrucomicrobiae bacterium Tous-C2TDCM	1	15	1.43e-23	677	4-375 (381)	2-421 (464)
AF-A0A7T9K296-F1-model_v4	VWA domain-containing protein	Chitinophagaceae bacterium	1	17.8	5.55e-23	677	3-377 (381)	70-488 (490)
AF-A0A519BFB9-F1-model_v4	VWA domain-containing protein	Candidatus Acididesulfobacter guangdongensis	1	18.4	7.95e-24	676	1-378 (381)	3-484 (487)
AF-A0A1D6HD96-F1-model_v4	Protein binding protein	Zea mays	1	17.5	1.81e-23	676	1-376 (381)	201-640 (696)
AF-A0DZ93-F1-model_v4	VWFA domain-containing protein	Paramecium tetraurelia	1	17.4	1.21e-24	673	5-380 (381)	78-476 (522)
AF-A0A1F7FZH4-F1-model_v4	Anti-sigma factor antagonist	Candidatus Riflebacteria bacterium GWC2_50_8	1	18.6	1.2e-23	673	4-377 (381)	2-414 (713)
AF-A0A7S4MLW3-F1-model_v4	Hypothetical protein	Vannella robusta	1	16.4	6.29e-24	670	3-379 (381)	7-429 (454)
AF-A0A814FQM8-F1-model_v4	Hypothetical protein	Adineta steineri	1	15.5	3.47e-23	669	3-375 (381)	467-871 (888)
AF-A0A5S9F3G8-F1-model_v4	VWFA domain-containing protein	Candidatus Uabimicrobium amorphum	1	16.9	1.43e-23	668	4-378 (381)	2-407 (414)
AF-H8YWJ8-F1-model_v4	Uncharacterized protein containing a von Willebrand factor type A (VWA) domain	Thiorhodovibrio sp. 970	1	15.6	1e-22	662	4-379 (381)	1-403 (419)
AF-Q22SJ7-F1-model_v4	von willebrand factor type A (VWA) domain was originally protein	Tetrahymena thermophila SB210	1	11.5	7.03e-23	660	2-379 (381)	144-593 (642)
AF-A0A7S4HIH2-F1-model_v4	Hypothetical protein	Vannella robusta	1	16.4	1.19e-22	659	5-379 (381)	7-419 (642)
AF-A0A3N6BTK3-F1-model_v4	VWA domain-containing protein	Acidobacteria bacterium	1	16.5	4.94e-23	657	1-380 (381)	2-407 (410)
AF-A0A4P6JVV3-F1-model_v4	VWA domain-containing protein	Ktedonosporobacter rubrisoli	1	14.7	1.06e-22	657	1-381 (381)	47-464 (467)
AF-A0A835AWF2-F1-model_v4	Uncharacterized protein	Digitaria exilis	1	14.7	5.55e-23	657	1-376 (381)	220-648 (661)
AF-A0A2H5Y8Z9-F1-model_v4	Curved DNA-binding protein	Candidatus Thermoflexus japonica	1	16.6	2.92e-24	656	1-375 (381)	82-483 (496)
AF-A0A3D0UIT1-F1-model_v4	VWFA domain-containing protein	Chloroflexi bacterium	1	20	5.27e-24	655	1-378 (381)	4-410 (421)
AF-A0A0F6SG99-F1-model_v4	von Willebrand factor type A domain protein	Sandaracinus amylolyticus	1	17	7.03e-23	655	1-354 (381)	64-455 (480)
AF-A0A2N2XPF1-F1-model_v4	VWFA domain-containing protein	Bacteroidetes bacterium HGW-Bacteroidetes-21	1	17.1	7.03e-23	655	2-381 (381)	54-486 (486)
AF-A0A0E0FBP4-F1-model_v4	VWFA domain-containing protein	Oryza meridionalis	1	15.4	3.44e-22	655	2-381 (381)	32-443 (527)
AF-A0A6J0KWP3-F1-model_v4	uncharacterized protein LOC108822830	Raphanus sativus	1	16.7	7.03e-23	655	1-377 (381)	145-579 (627)
AF-A0A5Q4G5Y8-F1-model_v4	VWA domain-containing protein	Trueperaceae bacterium	1	15.3	1.43e-23	655	1-379 (381)	3-404 (642)
AF-A0A7K0TWX3-F1-model_v4	VWA domain-containing protein	Actinomycetia bacterium	1	16.1	2.3e-23	651	3-381 (381)	55-463 (474)
AF-A0A287DW15-F1-model_v4	Uncharacterized protein	Hordeum vulgare subsp. vulgare	1	14.7	1.81e-23	651	2-376 (381)	119-565 (606)
AF-A0A800G609-F1-model_v4	VWA domain-containing protein	Planctomycetota bacterium	1	16.3	1.06e-22	650	4-379 (381)	3-410 (432)
AF-A0A7Y6PLZ4-F1-model_v4	VWA domain-containing protein	Kofleriaceae bacterium	1	17.8	2.74e-23	650	3-381 (381)	37-473 (474)
AF-F2D1S1-F1-model_v4	Predicted protein	Hordeum vulgare subsp. vulgare	1	14.5	5.52e-22	649	2-379 (381)	161-607 (707)
AF-A0A402ALU6-F1-model_v4	VWA domain-containing protein	Dictyobacter kobayashii	1	15.8	1.52e-23	647	2-381 (381)	1-417 (420)
AF-A0A1Q3T463-F1-model_v4	VWFA domain-containing protein	Chloroflexi bacterium 54-19	1	17.1	5.59e-24	646	2-375 (381)	16-424 (428)
AF-A0A0F6VZ61-F1-model_v4	von Willebrand factor type A domain protein	Sandaracinus amylolyticus	1	13	9.37e-22	646	2-378 (381)	243-641 (643)
AF-A0A6M4IVZ8-F1-model_v4	VWA domain-containing protein	Gemmatimonas groenlandica	1	17.7	2.6e-24	644	1-379 (381)	1-427 (437)
AF-A0A1F7L262-F1-model_v4	VWFA domain-containing protein	Candidatus Roizmanbacteria bacterium RIFOXYD1_FULL_38_12	1	18	5.2e-22	644	1-358 (381)	56-449 (474)
AF-A0A813UEG5-F1-model_v4	Hypothetical protein	Didymodactylos carnosus	1	14.8	5.89e-23	643	3-381 (381)	10-423 (530)
AF-A0A815GXC2-F1-model_v4	Hypothetical protein	Didymodactylos carnosus	1	14.6	1.19e-22	641	3-377 (381)	13-443 (451)
AF-A0A835CJN0-F1-model_v4	E3 ubiquitin-protein ligase WAV3-like	Senna tora	1	16.1	2.42e-22	641	1-376 (381)	260-683 (742)
AF-A0A811RQF5-F1-model_v4	Hypothetical protein	Miscanthus lutarioriparius	1	15.2	3.27e-23	640	5-381 (381)	23-444 (534)
AF-A0A350JMR2-F1-model_v4	VWFA domain-containing protein	Flavobacteriales bacterium	1	16.2	1.19e-21	639	2-375 (381)	1-404 (440)
AF-A0A3D3AP17-F1-model_v4	VWFA domain-containing protein	Spirochaetia bacterium	1	17.4	1.8e-22	639	4-375 (381)	165-569 (572)
AF-A0A4D8YAW1-F1-model_v4	Uncharacterized protein	Salvia splendens	1	16.8	9.43e-23	639	2-376 (381)	214-657 (715)
AF-A0A446TBB1-F1-model_v4	Uncharacterized protein	Triticum turgidum subsp. durum	1	14.3	7.45e-23	638	1-376 (381)	86-524 (599)
AF-A0A1Y1HJJ3-F1-model_v4	Uncharacterized protein	Klebsormidium nitens	1	14.4	6.98e-22	636	1-379 (381)	212-629 (668)
AF-A0A520PRU4-F1-model_v4	VWA domain-containing protein	Sandaracinaceae bacterium	1	21	1.27e-22	635	2-284 (381)	36-348 (348)
AF-A0A838WEV3-F1-model_v4	VWA domain-containing protein	Gemmatimonadetes bacterium	1	18.4	1.91e-22	632	4-380 (381)	2-409 (553)
AF-A0A0F6YMS6-F1-model_v4	VWFA domain-containing protein	Sandaracinus amylolyticus	1	15.8	3.87e-22	631	2-379 (381)	225-670 (670)
AF-A0A661NCI9-F1-model_v4	VWFA domain-containing protein	Deltaproteobacteria bacterium	1	15.8	5.89e-23	631	2-381 (381)	411-854 (856)
AF-A0A176S2E8-F1-model_v4	von Willebrand factor type A domain-containing protein	Candidatus Thiomargarita nelsonii	1	21.9	4.33e-21	630	13-293 (381)	6-314 (325)
AF-A0A816GWQ0-F1-model_v4	Hypothetical protein	Rotaria magnacalcarata	1	14.6	1.01e-23	629	3-380 (381)	10-425 (433)
AF-A0A287GRP6-F1-model_v4	Uncharacterized protein	Hordeum vulgare subsp. vulgare	1	15.8	4.91e-22	629	4-380 (381)	98-520 (559)
AF-F4IU12-F1-model_v4	Zinc finger (C3HC4-type RING finger) family protein	Arabidopsis thaliana	1	15.2	5.85e-22	629	2-376 (381)	200-636 (692)
AF-A0A2W5T768-F1-model_v4	VWA domain-containing protein	Archangium gephyra	1	15.9	2.72e-22	625	4-374 (381)	2-393 (409)
AF-A0A5N0T9D7-F1-model_v4	VWA domain-containing protein	Wenzhouxiangella sp. W260	1	15.5	1.92e-23	625	1-379 (381)	4-428 (448)
AF-A0A368RF10-F1-model_v4	Uncharacterized protein	Setaria italica	1	14.2	1.26e-21	625	1-376 (381)	162-599 (703)
AF-A0A3B6QB63-F1-model_v4	VWFA domain-containing protein	Triticum aestivum	1	16.1	2.27e-21	620	2-379 (381)	29-433 (706)
AF-A0A1X4H8X5-F1-model_v4	VWFA domain-containing protein	Halorubrum ezzemoulense DSM 17463	1	15.1	1.12e-21	618	2-373 (381)	18-414 (416)
AF-A0A0M2PYR1-F1-model_v4	VWFA domain-containing protein	Prochlorothrix hollandica PCC 9006 = CALU 1027	1	16.1	4.36e-22	617	1-371 (381)	1-407 (411)
AF-A0A7S4HQK4-F1-model_v4	Hypothetical protein	Vannella robusta	1	15.9	3.06e-22	616	1-345 (381)	96-473 (474)
AF-A0A7K1C7W8-F1-model_v4	VWA domain-containing protein	Actinomycetia bacterium	1	16.4	1.42e-22	616	3-381 (381)	110-519 (526)
AF-A0A2D9TDH7-F1-model_v4	VWFA domain-containing protein	Sandaracinus sp.	1	16.2	1.43e-23	614	2-381 (381)	36-442 (442)
AF-A0A2N5JPN5-F1-model_v4	VWA domain-containing protein	Cyanobacteria bacterium M5B4	1	14.3	4.08e-21	614	4-381 (381)	1-457 (457)
AF-A0A6N7Q1P1-F1-model_v4	VWA domain-containing protein	Polyangium spumosum	1	16.9	1.6e-22	614	2-381 (381)	99-540 (542)
AF-A0A835CE86-F1-model_v4	Uncharacterized protein	Digitaria exilis	1	14.9	1.69e-21	613	1-376 (381)	152-566 (783)
AF-A0A661W0Y7-F1-model_v4	Uncharacterized protein	Chloroflexi bacterium	1	16.9	1.36e-24	612	3-372 (381)	78-476 (491)
AF-A0A6A6K8Y1-F1-model_v4	Uncharacterized protein	Hevea brasiliensis	1	15.2	4.11e-22	611	1-376 (381)	208-654 (1252)
AF-A0A7S2PK22-F1-model_v4	Hypothetical protein	Brandtodinium nutricula	1	14.4	3.23e-21	604	3-379 (381)	76-498 (504)
AF-A0A3M0YL02-F1-model_v4	VWA domain-containing protein	Cyanobacteria bacterium J149	1	16.9	7.9e-23	602	2-379 (381)	5-409 (412)
AF-A0A2D9SZX3-F1-model_v4	VWFA domain-containing protein	Sandaracinus sp.	1	16.5	5.52e-22	601	1-375 (381)	19-438 (468)
AF-A0A497QMC3-F1-model_v4	VWFA domain-containing protein	Candidatus Lokiarchaeota archaeon	1	18.6	2.27e-21	600	1-324 (381)	4-376 (385)
AF-A0A7Y5K420-F1-model_v4	VWA domain-containing protein	Gemmatimonadaceae bacterium	1	18.2	1.26e-21	596	6-375 (381)	2-404 (418)
AF-A0A1D8CYE3-F1-model_v4	VWFA domain-containing protein	Chlorobaculum limnaeum	1	14.5	2.03e-22	596	2-378 (381)	4-421 (457)
AF-A0CDA1-F1-model_v4	VWFA domain-containing protein	Paramecium tetraurelia	1	15.2	6.98e-22	592	2-379 (381)	125-561 (604)
AF-A0A7V9PHA9-F1-model_v4	VWA domain-containing protein	Gemmatimonadales bacterium	1	15.6	3.02e-20	591	4-375 (381)	2-402 (421)
AF-A0A1G6R5L1-F1-model_v4	von Willebrand factor type A domain-containing protein	Glycomyces harbinensis	1	14.6	2.89e-22	591	1-381 (381)	1-425 (427)
AF-A0A2T0TGV7-F1-model_v4	Ca-activated chloride channel family protein	Umezawaea tangerina	1	12.3	6.54e-21	590	2-381 (381)	4-428 (478)
AF-A0A835BZ74-F1-model_v4	Uncharacterized protein	Digitaria exilis	1	14.4	9.94e-22	589	2-376 (381)	397-823 (965)
AF-A0A7Y5FRP1-F1-model_v4	VWA domain-containing protein	Ignavibacteriaceae bacterium	1	18.5	5.23e-23	585	1-381 (381)	1-415 (451)
AF-A0A0K1E5P5-F1-model_v4	VWFA domain-containing protein	Chondromyces crocatus	1	16.3	1.42e-21	583	1-367 (381)	206-626 (651)
AF-A0A453J5J5-F1-model_v4	VWFA domain-containing protein	Aegilops tauschii subsp. strangulata	1	14.5	4.87e-21	581	2-371 (381)	25-451 (452)
AF-A0A845ZQ87-F1-model_v4	VWA domain-containing protein	Moorena sp. SIO3E2	1	19	3.04e-21	580	1-281 (381)	1-321 (321)
AF-A0A811T7K5-F1-model_v4	von Willebrand factor type A domain protein	Candidatus Argoarchaeum ethanivorans	1	18.9	4.87e-21	573	2-324 (381)	21-391 (413)
AF-A0A2I2KX18-F1-model_v4	von Willebrand factor type A	Frankia canadensis	1	15.3	7.76e-20	570	2-372 (381)	1-412 (421)
AF-A0A661NC60-F1-model_v4	VWFA domain-containing protein	Deltaproteobacteria bacterium	1	14.7	1.6e-22	570	2-379 (381)	82-490 (491)
AF-A0A841FCY5-F1-model_v4	Uncharacterized protein YegL	Phytomonospora endophytica	1	14.4	4.57e-20	569	2-381 (381)	6-428 (450)
AF-K3ZMB3-F1-model_v4	VWFA domain-containing protein	Setaria italica	1	15.3	5.17e-21	568	3-376 (381)	24-428 (476)
AF-A0A355CM11-F1-model_v4	VWFA domain-containing protein	Microcoleaceae bacterium UBA10368	1	19.8	4.08e-21	560	1-312 (381)	1-352 (356)
AF-A0A660RCF4-F1-model_v4	Uncharacterized protein	Thermotoga sp.	1	22.6	9.94e-22	557	1-334 (381)	236-559 (699)
AF-A0A1F8N2Z9-F1-model_v4	VWFA domain-containing protein	Chloroflexi bacterium RBG_13_56_8	1	20.6	7.41e-22	555	3-308 (381)	5-347 (352)
AF-A0A4R1HGY9-F1-model_v4	von Willebrand factor type A domain-containing protein	Pseudonocardia endophytica	1	18.1	3.38e-19	555	3-349 (381)	4-382 (406)
AF-A0A2N2IZ23-F1-model_v4	VWFA domain-containing protein	Deltaproteobacteria bacterium HGW-Deltaproteobacteria-20	1	14.4	1.24e-19	552	1-381 (381)	67-461 (483)
AF-A0A1R2C225-F1-model_v4	VWFA domain-containing protein	Stentor coeruleus	1	16	1.18e-20	552	3-380 (381)	124-538 (565)
AF-A0A1F5Q2Y9-F1-model_v4	VWFA domain-containing protein	Candidatus Doudnabacteria bacterium RIFCSPLOWO2_01_FULL_44_21	1	15	1.04e-19	546	3-372 (381)	5-409 (426)
AF-A0A897MRJ4-F1-model_v4	VWFA domain containing protein	Natranaeroarchaeum sulfidigenes	1	20.1	5.48e-21	544	2-358 (381)	6-379 (393)
AF-A0A7C0XYK4-F1-model_v4	VWA domain-containing protein	Chloroflexi bacterium	1	18.6	1.68e-20	542	1-284 (381)	12-332 (332)
AF-A0A1R2AXG2-F1-model_v4	VWFA domain-containing protein	Stentor coeruleus	1	11.8	7.76e-20	542	1-381 (381)	52-450 (483)
AF-A0A0E0IPF9-F1-model_v4	VWFA domain-containing protein	Oryza nivara	1	12.7	4.28e-19	540	1-376 (381)	224-691 (725)
AF-A0A2E8ULY3-F1-model_v4	VWFA domain-containing protein	Verrucomicrobiales bacterium	1	22.2	8.78e-21	538	1-333 (381)	89-421 (609)
AF-A0A841FTJ3-F1-model_v4	Uncharacterized protein	Phytomonospora endophytica	1	13.9	1.88e-19	536	1-381 (381)	3-416 (424)
AF-A0A7S4HJD7-F1-model_v4	Hypothetical protein	Vannella robusta	1	14.6	7.27e-19	536	2-375 (381)	22-447 (472)
AF-A0A6A0I078-F1-model_v4	VWA domain-containing protein	candidate division KSB1 bacterium	1	19.3	5.45e-20	536	1-379 (381)	62-451 (550)
AF-A0A2E8SR65-F1-model_v4	VWFA domain-containing protein	Verrucomicrobiales bacterium	1	17.9	3.23e-21	534	2-379 (381)	16-422 (546)
AF-A0A2E9QR74-F1-model_v4	VWFA domain-containing protein	Deltaproteobacteria bacterium	1	16.9	3.4e-20	534	3-373 (381)	12-418 (566)
AF-A0EHG0-F1-model_v4	VWFA domain-containing protein	Paramecium tetraurelia	1	14.5	1.25e-20	532	2-379 (381)	80-483 (533)
AF-A0A7Y6PTV6-F1-model_v4	VWA domain-containing protein	Kofleriaceae bacterium	1	17.4	2.24e-19	530	1-316 (381)	37-387 (388)
AF-A0A844H1U5-F1-model_v4	VWA domain-containing protein	Cyanobacterium aponinum 0216	1	16.3	2.57e-22	530	2-381 (381)	1-403 (404)
AF-H5TIC8-F1-model_v4	VWFA domain-containing protein	Gordonia otitidis NBRC 100426	1	16.1	1.3e-17	522	4-282 (381)	2-312 (329)
AF-A0A7V7ZFL0-F1-model_v4	VWA domain-containing protein	Chloroflexia bacterium SDU3-3	1	14.9	3.4e-20	522	1-375 (381)	3-434 (437)
AF-A0A7S4LPT1-F1-model_v4	Hypothetical protein	Eutreptiella gymnastica	1	14.3	1.99e-19	522	2-380 (381)	62-467 (492)
AF-A0A497S5B7-F1-model_v4	Uncharacterized protein	Candidatus Altiarchaeales archaeon	1	19.1	6.9e-20	520	1-375 (381)	239-622 (757)
AF-A0A660R9T9-F1-model_v4	VWFA domain-containing protein	Thermotoga sp.	1	21	6.09e-19	519	1-334 (381)	111-440 (580)
AF-A0A7C4ZWB9-F1-model_v4	VWA domain-containing protein	Anaerolineae bacterium	1	20.8	4.87e-21	519	1-378 (381)	254-637 (1026)
AF-A0A7C4V094-F1-model_v4	VWA domain-containing protein	Anaerolineae bacterium	1	21.1	1.24e-19	515	1-381 (381)	244-627 (744)
AF-A0A3B8LGX9-F1-model_v4	Trypsin	Myxococcales bacterium	1	19	2.66e-18	512	1-327 (381)	236-562 (759)
AF-A0A7Y5GZS9-F1-model_v4	VWA domain-containing protein	Myxococcales bacterium	1	17.5	1.1e-18	509	1-334 (381)	244-566 (771)
AF-A0A843JW21-F1-model_v4	VWA domain-containing protein	Methanothrix sp.	1	19.4	1.76e-18	506	1-378 (381)	235-614 (721)
AF-A0A410TKS2-F1-model_v4	VWA domain-containing protein	Halorubrum sp. BOL3-1	1	16	4.54e-19	503	1-362 (381)	1-391 (401)
AF-A0A1R2BLU3-F1-model_v4	VWFA domain-containing protein	Stentor coeruleus	1	12.8	3.59e-19	503	3-381 (381)	51-444 (451)
AF-I0I866-F1-model_v4	Uncharacterized protein	Caldilinea aerophila DSM 14535 = NBRC 104270	1	19.2	9.88e-21	501	1-375 (381)	249-630 (747)
AF-A0A6L3F6W4-F1-model_v4	VWA domain-containing protein	Chloroflexi bacterium	1	18.4	3.59e-19	500	2-282 (381)	76-386 (387)
AF-A0A524PGI8-F1-model_v4	VWA domain-containing protein	Anaerolineales bacterium	1	18.9	7.76e-20	500	1-374 (381)	248-606 (647)
AF-A0A7W7QNS5-F1-model_v4	Ca-activated chloride channel family protein	Streptosporangium saharense	1	14.8	5.07e-18	499	1-375 (381)	1-420 (461)
AF-A0A7T9J838-F1-model_v4	VWA domain-containing protein	Ignavibacteriales bacterium	1	17.1	6.09e-19	498	1-332 (381)	231-567 (776)
AF-A0A812YDL5-F1-model_v4	YAF9 protein	Symbiodinium microadriaticum	1	13.3	1.38e-17	495	4-378 (381)	33-612 (720)
AF-A0A3B8H9T6-F1-model_v4	Uncharacterized protein	Flavobacteriales bacterium	1	18.3	2.11e-19	495	1-381 (381)	247-645 (737)
AF-A0A849WKG7-F1-model_v4	VWA domain-containing protein	Candidatus Brocadiae bacterium	1	19.4	3.59e-19	494	1-333 (381)	238-568 (736)
AF-A0DFQ1-F1-model_v4	VWFA domain-containing protein	Paramecium tetraurelia	1	16.1	3.17e-18	493	3-278 (381)	101-418 (470)
AF-A0A7C7Q1P7-F1-model_v4	VWA domain-containing protein	Armatimonadetes bacterium	1	16.1	1.23e-18	485	1-380 (381)	14-395 (610)
AF-A0A7C0UUC5-F1-model_v4	VWA domain-containing protein	Proteobacteria bacterium	1	19.7	6.94e-21	482	2-353 (381)	13-399 (400)
AF-A0A399WPE7-F1-model_v4	VWA domain-containing protein	Armatimonadetes bacterium	1	14.3	2.5e-18	480	2-374 (381)	10-371 (479)
AF-A0A7T9FLI3-F1-model_v4	VWA domain-containing protein	Sphingobacteriales bacterium	1	12.8	1.3e-17	480	1-381 (381)	253-644 (755)
AF-A0A3D3ZZE4-F1-model_v4	Uncharacterized protein	Planctomycetaceae bacterium	1	16.9	2.23e-18	480	1-379 (381)	263-655 (771)
AF-A0A661MUX6-F1-model_v4	Trypsin	Deltaproteobacteria bacterium	1	18.8	4.78e-18	479	1-334 (381)	242-576 (691)
AF-A0A363T752-F1-model_v4	Uncharacterized protein	Anaerolineales bacterium	1	16.8	3.38e-19	479	4-375 (381)	288-670 (827)
AF-A0A662SEZ2-F1-model_v4	VWFA domain-containing protein	Candidatus Korarchaeota archaeon	1	13.9	9.2e-19	477	3-376 (381)	10-392 (406)
AF-A0A3M1WS76-F1-model_v4	VWA domain-containing protein	Gammaproteobacteria bacterium	1	20	2.83e-19	477	2-334 (381)	75-394 (478)
AF-A0A832HTY4-F1-model_v4	VWA domain-containing protein	Verrucomicrobia subdivision 3 bacterium	1	23.1	1.08e-16	476	1-273 (381)	265-542 (543)
AF-A0A7X7P0T8-F1-model_v4	VWA domain-containing protein	Lentisphaerae bacterium	1	15.2	3.36e-18	476	3-334 (381)	249-571 (584)
AF-A0A4Q3XVL2-F1-model_v4	VWA domain-containing protein	bacterium	1	17.5	5.04e-17	472	2-275 (381)	66-369 (369)
AF-A0A1G1CBJ7-F1-model_v4	VWFA domain-containing protein	Lentisphaerae bacterium RIFOXYB12_FULL_65_16	1	17.5	4.51e-18	472	3-334 (381)	248-573 (580)
AF-A0A523YF52-F1-model_v4	VWA domain-containing protein	Methanomassiliicoccales archaeon	1	18.1	8.08e-17	465	15-360 (381)	1-376 (390)
AF-A0A7X9HN33-F1-model_v4	VWA domain-containing protein	Myxococcales bacterium	1	18.6	9.7e-18	465	1-334 (381)	233-557 (768)
AF-A0A3D0N6Y5-F1-model_v4	Uncharacterized protein	Armatimonadetes bacterium	1	19.9	2.35e-17	462	1-324 (381)	238-563 (601)
AF-A0A7C3WU42-F1-model_v4	VWA domain-containing protein	Candidatus Hydrogenedentes bacterium	1	15.4	1.03e-17	462	3-333 (381)	275-598 (608)
AF-A0A2V7N3L0-F1-model_v4	Uncharacterized protein	Gemmatimonadetes bacterium	1	19.5	6.77e-17	462	1-313 (381)	232-534 (716)
AF-A0A1D6K5F3-F1-model_v4	Inter-alpha-trypsin inhibitor heavy chain-related	Zea mays	1	16.5	3.99e-17	461	2-292 (381)	125-428 (460)
AF-A0A118K7H4-F1-model_v4	von Willebrand factor, type A	Cynara cardunculus var. scolymus	1	16.9	5.67e-17	461	1-287 (381)	253-552 (716)
AF-A0A7C6WRJ0-F1-model_v4	VWA domain-containing protein	Clostridium sp.	1	19.1	1.16e-18	461	2-279 (381)	309-617 (751)
AF-W1NXN7-F1-model_v4	VWFA domain-containing protein	Amborella trichopoda	1	19.2	1.16e-17	460	2-330 (381)	290-615 (761)
AF-A0A6N2MU67-F1-model_v4	Nucleoside-diphosphate kinase	Salix viminalis	1	19.2	4.78e-18	460	2-334 (381)	292-617 (1228)
AF-A0A5S9IR12-F1-model_v4	Inter-alpha-trypsin inhibitor domain-containing protein	Candidatus Uabimicrobium amorphum	1	16.6	4.75e-17	459	4-334 (381)	213-530 (855)
AF-A0A7C4YZT1-F1-model_v4	VWA domain-containing protein	Candidatus Hydrogenedentes bacterium	1	15.1	2.08e-17	457	2-334 (381)	268-594 (603)
AF-A0A6M2EN01-F1-model_v4	VWFA domain-containing protein	Populus davidiana	1	16.2	2.66e-18	457	1-332 (381)	286-610 (756)
AF-A0A2G6J5K1-F1-model_v4	Uncharacterized protein	Proteobacteria bacterium	1	11.6	8.18e-19	456	1-380 (381)	238-670 (675)
AF-A0A2G5C9U8-F1-model_v4	VWFA domain-containing protein	Aquilegia coerulea	1	18.9	1.37e-16	453	2-285 (381)	293-582 (589)
AF-A0A7V3PR53-F1-model_v4	VWA domain-containing protein	Armatimonadetes bacterium	1	19.7	1.16e-17	453	1-328 (381)	240-570 (700)
AF-A0A7Y2FCR3-F1-model_v4	Uncharacterized protein	Xanthomonadales bacterium	1	9.5	5.67e-17	453	2-374 (381)	394-829 (839)
AF-U7D5G9-F1-model_v4	VWFA domain-containing protein	Chitinivibrio alkaliphilus ACht1	1	13.4	5.71e-18	452	1-381 (381)	19-404 (428)
AF-A0A1F4YD65-F1-model_v4	Uncharacterized protein	candidate division Zixibacteria bacterium RBG_16_53_22	1	18.7	2.08e-17	452	4-324 (381)	242-562 (705)
AF-A0A0Q3EY69-F1-model_v4	VWFA domain-containing protein	Brachypodium distachyon	1	13.1	6.42e-18	451	1-373 (381)	234-662 (692)
AF-A0A3M1R465-F1-model_v4	VWA domain-containing protein	Planctomycetota bacterium	1	16.1	6.05e-18	451	4-381 (381)	195-586 (717)
AF-J0P396-F1-model_v4	Uncharacterized protein containing a von Willebrand factor type A (VWA) domain	Saprospira grandis DSM 2844	1	16.2	3.17e-18	451	3-380 (381)	235-629 (728)
AF-A0A813JHH8-F1-model_v4	Hypothetical protein	Polarella glacialis	1	13.3	2.36e-18	450	2-375 (381)	30-463 (492)
AF-M8AHD1-F1-model_v4	VWFA domain-containing protein	Aegilops tauschii	1	14.4	5.67e-17	449	4-279 (381)	2-328 (328)
AF-A0A6C0IG70-F1-model_v4	VWFA domain-containing protein	viral metagenome	1	12.5	1.15e-16	449	5-377 (381)	4-430 (555)
AF-A0A6C0DQE9-F1-model_v4	VWFA domain-containing protein	viral metagenome	1	15.8	6.38e-17	448	4-377 (381)	34-439 (559)
AF-A0A1Q9NZB2-F1-model_v4	Uncharacterized protein	Candidatus Heimdallarchaeota archaeon LC_2	1	17.5	4.46e-16	448	7-332 (381)	231-545 (627)
AF-A0A2W1B6C4-F1-model_v4	Ca-activated chloride channel family protein	Chloroflexi bacterium	1	20.7	1.04e-18	448	4-373 (381)	253-631 (841)
AF-A0A517N3F4-F1-model_v4	von Willebrand factor	Rubripirellula lacrimiformis	1	16.4	7.31e-20	448	1-358 (381)	505-885 (887)
AF-A0A3D1IBG5-F1-model_v4	VWFA domain-containing protein	Armatimonadetes bacterium	1	16.6	3.34e-17	447	2-381 (381)	10-378 (481)
AF-A0A0F0CJ07-F1-model_v4	Inter-alpha-trypsin inhibitor heavy chain H5	Candidatus Omnitrophus magneticus	1	17.6	6.34e-16	446	2-308 (381)	226-528 (562)
AF-A0A7C8EUV9-F1-model_v4	VWA domain-containing protein	Candidatus Hydrogenedentes bacterium	1	17.9	1.54e-16	446	2-334 (381)	245-570 (579)
AF-A0A7W1TDH4-F1-model_v4	VWA domain-containing protein	Planctomycetota bacterium	1	17.3	4.75e-17	446	5-332 (381)	199-535 (690)
AF-A0A6C0B7B2-F1-model_v4	VWFA domain-containing protein	viral metagenome	1	14.1	5.04e-17	443	5-377 (381)	4-411 (493)
AF-A0A2V9NN37-F1-model_v4	VWFA domain-containing protein	Acidobacteria bacterium	1	21.4	1.38e-17	442	1-336 (381)	134-456 (536)
AF-W9QZP4-F1-model_v4	UPF0481 protein	Morus notabilis	1	15.1	1.04e-18	441	1-304 (381)	237-569 (1082)
AF-A0A8B6EGP7-F1-model_v4	Uncharacterized protein	Mytilus galloprovincialis	1	16.5	1.97e-17	440	4-334 (381)	11-356 (685)
AF-A0A6P6ET81-F1-model_v4	inter-alpha-trypsin inhibitor heavy chain H5 isoform X2	Octodon degus	1	17	3.76e-17	440	12-332 (381)	284-624 (837)
AF-A0A524LN02-F1-model_v4	VWA domain-containing protein	Candidatus Thorarchaeota archaeon	1	17.8	3.15e-17	439	5-324 (381)	157-472 (577)
AF-A0A067FCA2-F1-model_v4	VWFA domain-containing protein	Citrus sinensis	1	18.1	1.45e-16	439	2-291 (381)	288-584 (591)
AF-A0A0D2LTD4-F1-model_v4	VWFA domain-containing protein	Gossypium raimondii	1	17.9	1.21e-15	439	2-291 (381)	289-584 (654)
AF-A0A1F4XN17-F1-model_v4	Uncharacterized protein	candidate division Zixibacteria bacterium RBG_16_43_9	1	17.7	8.08e-17	438	5-332 (381)	239-556 (716)
AF-A0A6J0KMI3-F1-model_v4	uncharacterized protein LOC108819708	Raphanus sativus	1	19.6	1.74e-16	437	2-287 (381)	289-580 (668)
AF-A0A3M1ALJ4-F1-model_v4	VWA domain-containing protein	Deltaproteobacteria bacterium	1	18.7	8.57e-17	436	1-291 (381)	232-527 (701)
AF-A0A7V5H4C2-F1-model_v4	VWA domain-containing protein	Caldithrix abyssi	1	18.3	1.95e-16	435	4-332 (381)	234-569 (695)
AF-A0A7S0IG22-F1-model_v4	Hypothetical protein	Micromonas pusilla	1	19.9	6.38e-17	435	4-321 (381)	277-606 (750)
AF-A0A7C5LAN0-F1-model_v4	VWA domain-containing protein	Deltaproteobacteria bacterium	1	17.5	1.39e-18	434	2-375 (381)	150-524 (525)
AF-A0A151F202-F1-model_v4	Uncharacterized protein	Thermoplasmatales archaeon SG8-52-3	1	18	2.62e-16	434	1-334 (381)	226-553 (624)
AF-A0A6C0B9R1-F1-model_v4	VWFA domain-containing protein	viral metagenome	1	13	5.04e-17	433	5-377 (381)	4-398 (461)
AF-A0A6M8W1J1-F1-model_v4	VWA domain-containing protein	Planctomycetota bacterium	1	15.7	1.54e-16	432	5-375 (381)	38-445 (553)
AF-A0A2K1WWP7-F1-model_v4	VWFA domain-containing protein	Populus trichocarpa	1	17.6	6.81e-18	432	2-335 (381)	277-603 (745)
AF-A0A2G2WBN7-F1-model_v4	VWFA domain-containing protein	Capsicum baccatum	1	18.5	2.8e-17	432	5-332 (381)	289-609 (751)
AF-A0A3B1DSV4-F1-model_v4	Uncharacterized protein	hydrothermal vent metagenome	1	18.2	5.67e-17	432	5-381 (381)	252-678 (786)
AF-A0A2N2JDG6-F1-model_v4	VWFA domain-containing protein	Deltaproteobacteria bacterium HGW-Deltaproteobacteria-14	1	13.3	9.14e-18	431	3-358 (381)	80-469 (487)
AF-A0A0D9RIM6-F1-model_v4	Inter-alpha-trypsin inhibitor heavy chain family member 6	Chlorocebus sabaeus	1	16.6	1.22e-16	430	16-332 (381)	213-552 (765)
AF-A0A349GVZ9-F1-model_v4	VWFA domain-containing protein	Verrucomicrobia bacterium	1	19.4	2.35e-17	429	1-379 (381)	216-595 (688)
AF-A0A5J5NAW2-F1-model_v4	VWFA domain-containing protein	Gossypium barbadense	1	20.1	1.84e-16	429	1-335 (381)	256-581 (718)
AF-A0A7C2JRA8-F1-model_v4	Marine proteobacterial sortase target protein	Gammaproteobacteria bacterium	1	17.1	5.98e-16	427	2-324 (381)	331-637 (725)
AF-A0A3B1DGA7-F1-model_v4	VWFA domain-containing protein	hydrothermal vent metagenome	1	14.2	4.75e-17	425	3-334 (381)	221-543 (557)
AF-A0A849E0D2-F1-model_v4	Marine proteobacterial sortase target protein	Enterobacterales bacterium	1	16.1	8.03e-16	425	1-332 (381)	286-600 (658)
AF-A0A7Y6UJW4-F1-model_v4	VWA domain-containing protein	Kofleriaceae bacterium	1	19.7	5.31e-16	424	6-332 (381)	222-534 (560)
AF-A0A1G0YB28-F1-model_v4	VWFA domain-containing protein	Lentisphaerae bacterium GWF2_57_35	1	16.5	9.64e-17	424	3-333 (381)	255-577 (592)
AF-A0A2E2A3L2-F1-model_v4	Marine proteobacterial sortase target protein	Candidatus Marinimicrobia bacterium	1	16.3	7.62e-17	424	3-334 (381)	293-610 (717)
AF-A0A4Q3X163-F1-model_v4	VWA domain-containing protein	bacterium	1	15.7	2.62e-16	422	1-379 (381)	6-350 (377)
AF-M5WWJ6-F1-model_v4	VWFA domain-containing protein	Prunus persica	1	17	5.67e-17	422	2-335 (381)	281-607 (624)
AF-A0A2E6RAK6-F1-model_v4	Marine proteobacterial sortase target protein	Xanthomonadales bacterium	1	18.8	2.32e-15	422	4-291 (381)	259-550 (682)
AF-A0A7X9DW31-F1-model_v4	AgmX/PglI C-terminal domain-containing protein	Myxococcales bacterium	1	12.3	5.04e-17	422	3-375 (381)	547-985 (1001)
AF-A0A446TNY5-F1-model_v4	VWFA domain-containing protein	Triticum turgidum subsp. durum	1	17.2	1.36e-15	421	22-276 (381)	2-304 (321)
AF-A0A1A6GW33-F1-model_v4	VWFA domain-containing protein	Neotoma lepida	1	16	6.34e-16	420	13-334 (381)	139-468 (1132)
AF-A0A5J5NDY3-F1-model_v4	VWFA domain-containing protein	Gossypium barbadense	1	20.6	1.95e-16	419	2-335 (381)	91-415 (552)
AF-V4UTY4-F1-model_v4	VWFA domain-containing protein	Citrus clementina	1	18.7	2.2e-16	419	2-345 (381)	289-609 (613)
AF-A0A382QF25-F1-model_v4	VWFA domain-containing protein	marine metagenome	1	15.9	3.32e-16	418	2-276 (381)	6-301 (302)
AF-A0A1B2YSL1-F1-model_v4	Inter-alpha-trypsin inhibitor domain-containing protein	uncultured bacterium	1	14.2	2.61e-15	418	2-332 (381)	269-595 (682)
AF-A0A1W9RB14-F1-model_v4	VWFA domain-containing protein	Candidatus Omnitrophica bacterium 4484_70.1	1	16.5	2.95e-16	417	2-334 (381)	206-529 (537)
AF-A0A1Y1I1F1-F1-model_v4	VWFA domain-containing protein	Klebsormidium nitens	1	16.7	8.08e-17	416	4-363 (381)	387-746 (868)
AF-A0A1G1A7V3-F1-model_v4	VWFA domain-containing protein	Lentisphaerae bacterium RIFOXYC12_FULL_60_16	1	15.5	4.72e-16	415	2-336 (381)	241-569 (578)
AF-A0A4D8YER6-F1-model_v4	VWFA domain-containing protein	Salvia splendens	1	17.6	8.57e-17	413	2-332 (381)	290-614 (749)
AF-A0A6L7PE08-F1-model_v4	VWA domain-containing protein	Chloroflexi bacterium	1	18.6	2.21e-17	413	1-374 (381)	246-619 (797)
AF-A0A1D6K5E6-F1-model_v4	Inter-alpha-trypsin inhibitor heavy chain-related	Zea mays	1	17.9	2.46e-15	413	2-285 (381)	363-652 (881)
AF-A0A835CCN6-F1-model_v4	Inter alpha-trypsin inhibitor, heavy chain 4-like isoform X1	Senna tora	1	18.6	4.2e-16	413	2-334 (381)	287-612 (910)
AF-A0A1H6FCF6-F1-model_v4	Uncharacterized protein	Thiotrichales bacterium HS_08	1	10.3	2.21e-17	411	1-379 (381)	338-789 (795)
AF-A0A150FWP6-F1-model_v4	VWFA domain-containing protein	Gonium pectorale	1	15.8	3.13e-16	410	2-305 (381)	12-350 (572)
AF-A0A7V3DHV2-F1-model_v4	VWA domain-containing protein	Candidatus Hydrogenedentes bacterium	1	16.8	3.3e-15	410	2-334 (381)	251-576 (585)
AF-A0A349H0W6-F1-model_v4	VWFA domain-containing protein	Verrucomicrobia bacterium	1	14.4	2.76e-15	410	3-334 (381)	255-585 (598)
AF-G3Q9J2-F1-model_v4	Inter-alpha-trypsin inhibitor heavy chain 5	Gasterosteus aculeatus	1	16.4	1.08e-16	410	11-332 (381)	254-596 (919)
AF-A0A7Z9HZ87-F1-model_v4	VWA domain-containing protein	Candidatus Hydrogenedentes bacterium	1	17.5	2.61e-15	409	1-334 (381)	153-479 (489)
AF-A0A7G9NXA0-F1-model_v4	VWA domain-containing protein	Planctomycetales bacterium ZRK34	1	16.9	2.8e-17	409	2-334 (381)	288-629 (636)
AF-A0A7W2YMV9-F1-model_v4	Marine proteobacterial sortase target protein	Colwellia sp. 6M3	1	16.1	1.08e-15	409	2-332 (381)	314-630 (711)
AF-A0A7X7MF69-F1-model_v4	VWA domain-containing protein	Lentisphaerae bacterium	1	19	3.71e-15	408	5-337 (381)	253-580 (588)
AF-A0A672IS21-F1-model_v4	Inter-alpha-trypsin inhibitor heavy chain family member 6	Salarias fasciatus	1	18.7	7.13e-16	408	8-332 (381)	206-547 (805)
AF-A0A1U8IDF3-F1-model_v4	uncharacterized protein LOC107893371 isoform X3	Gossypium hirsutum	1	21.2	9.58e-16	407	2-335 (381)	186-510 (651)
AF-A0A0K9PUB8-F1-model_v4	VWFA domain-containing protein	Zostera marina	1	17	2.07e-16	407	2-332 (381)	289-615 (753)
AF-A0A5K1CEY4-F1-model_v4	Uncharacterized protein	Nymphaea colorata	1	13.5	1.23e-18	406	3-373 (381)	157-554 (612)
AF-A0A318EAQ6-F1-model_v4	Ca-activated chloride channel family protein	Sinimarinibacterium flocculans	1	19.1	7.57e-16	406	1-289 (381)	282-568 (701)
AF-A0A7V4KPQ3-F1-model_v4	VWA domain-containing protein	Gemmatimonadetes bacterium	1	19.1	5.31e-16	406	1-332 (381)	233-551 (717)
AF-A0A3S1CDB9-F1-model_v4	VWFA domain-containing protein	Elysia chlorotica	1	17.5	1.95e-16	405	11-334 (381)	136-479 (844)
AF-Q2I6M5-F1-model_v4	VIT-vWFA-RpoN multidomain protein	uncultured delta proteobacterium DeepAnt-1F12	1	17	5.01e-16	405	1-332 (381)	260-578 (1156)
AF-A0A0R0GDN4-F1-model_v4	VWFA domain-containing protein	Glycine max	1	16.3	1.94e-15	404	3-335 (381)	65-403 (515)
AF-A0A7X0JT59-F1-model_v4	Ca-activated chloride channel family protein	Pseudoteredinibacter isoporae	1	16.5	2.61e-15	404	2-308 (381)	338-637 (754)
AF-A0A0F6W237-F1-model_v4	Exonuclease SbcC	Sandaracinus amylolyticus	1	12.3	9.64e-17	404	1-374 (381)	333-754 (762)
AF-G3H7S9-F1-model_v4	Inter-alpha-trypsin inhibitor heavy chain H5-like protein	Cricetulus griseus	1	15.9	3.32e-16	402	11-332 (381)	254-596 (983)
AF-A0A1S3HHW9-F1-model_v4	von Willebrand factor A domain-containing protein 5A isoform X5	Lingula anatina	1	17	2.2e-16	402	2-332 (381)	237-575 (1142)
AF-A0A496RYG4-F1-model_v4	VWFA domain-containing protein	Candidatus Omnitrophica bacterium	1	15.7	5.64e-16	401	3-334 (381)	222-544 (557)
AF-A0A7Y5FD08-F1-model_v4	VWA domain-containing protein	Candidatus Hydrogenedentes bacterium	1	17.5	1.29e-15	401	2-334 (381)	262-587 (595)
AF-Q6MWF9-F1-model_v4	B1160F02.17 protein	Oryza sativa Japonica Group	1	14.7	1.65e-17	400	1-358 (381)	189-582 (643)
AF-A0A2H0VMA0-F1-model_v4	VWFA domain-containing protein	Chlamydiae bacterium CG10_big_fil_rev_8_21_14_0_10_35_9	1	11.8	3.32e-16	399	5-333 (381)	239-566 (575)
AF-A0A7C1CLS2-F1-model_v4	VWA domain-containing protein	Candidatus Hydrogenedentes bacterium	1	16.6	3.94e-15	399	2-334 (381)	256-581 (591)
AF-R7E053-F1-model_v4	Vault protein inter-alpha-trypsin domain protein	Akkermansia sp. CAG:344	1	17	3.15e-17	399	5-379 (381)	255-643 (761)
AF-A0A5M4D8U3-F1-model_v4	VWA domain-containing protein	Cyanobacteria bacterium CYA	1	19.2	9.03e-16	399	3-333 (381)	248-589 (776)
AF-A0A849W935-F1-model_v4	VWA domain-containing protein	Candidatus Brocadiae bacterium	1	19.7	3.32e-16	399	4-332 (381)	305-615 (907)
AF-A0A172TID1-F1-model_v4	VWFA domain-containing protein	Paenibacillus swuensis	1	17.3	3.52e-16	399	1-282 (381)	32-350 (959)
AF-A0A4V0XFV0-F1-model_v4	VWFA domain-containing protein	Deltaproteobacteria bacterium	1	17.3	2.97e-17	398	2-370 (381)	150-523 (525)
AF-A0A2G6KUF3-F1-model_v4	Marine proteobacterial sortase target protein	Gammaproteobacteria bacterium	1	17.4	9.58e-16	398	5-332 (381)	291-608 (688)
AF-A0A7T9G4C4-F1-model_v4	VWA domain-containing protein	Acidobacteria bacterium	1	20.6	1.08e-16	398	2-332 (381)	272-590 (885)
AF-A0A1F7FEB5-F1-model_v4	Uncharacterized protein	Candidatus Raymondbacteria bacterium RIFOXYD12_FULL_49_13	1	15	2.76e-15	397	2-332 (381)	236-553 (692)
AF-A0A7C3C7X6-F1-model_v4	VWA domain-containing protein	Bryobacterales bacterium	1	19.4	1.53e-15	396	2-332 (381)	193-511 (560)
AF-A0A6P8P9L3-F1-model_v4	inter-alpha-trypsin inhibitor heavy chain H6 isoform X2	Geotrypetes seraphini	1	16.8	3.52e-16	396	8-334 (381)	263-605 (1125)
AF-A0A3D2VPL7-F1-model_v4	Uncharacterized protein	Candidatus Competibacteraceae bacterium	1	16.9	4.23e-17	395	1-332 (381)	218-544 (647)
AF-A0A1A3KIE2-F1-model_v4	Uncharacterized protein	Mycobacterium gordonae	1	17	1.14e-15	395	4-302 (381)	266-563 (667)
AF-W9DRB8-F1-model_v4	Uncharacterized protein containing a von Willebrand factor type A (VWA) domain	Methanolobus tindarius DSM 2278	1	14.2	6.73e-16	394	1-332 (381)	223-547 (649)
AF-A0A3M2A1T2-F1-model_v4	VWA domain-containing protein	Deltaproteobacteria bacterium	1	16	5.35e-17	394	1-381 (381)	339-725 (726)
AF-A0A6N2MR92-F1-model_v4	VWFA domain-containing protein	Salix viminalis	1	15.9	1.14e-15	394	1-310 (381)	282-607 (810)
AF-A0A4R6XR68-F1-model_v4	Uncharacterized protein	Marinicella litoralis	1	11.3	7.13e-16	394	1-381 (381)	435-883 (885)
AF-A0A356KIA3-F1-model_v4	Trypsin	Planctomycetota bacterium	1	16.2	1.54e-16	392	1-374 (381)	254-579 (752)
AF-A0A4R7PN66-F1-model_v4	Ca-activated chloride channel family protein	Glycomyces sp. MMG10089	1	16.2	6.05e-18	391	3-349 (381)	116-487 (490)
AF-A0A6C0ASA6-F1-model_v4	VWFA domain-containing protein	viral metagenome	1	15.5	8.03e-16	391	6-376 (381)	12-423 (516)
AF-A0A2W5T1Y4-F1-model_v4	VWFA domain-containing protein	Archangium gephyra	1	17.7	3.5e-15	391	2-279 (381)	163-465 (522)
AF-A0A518EMR9-F1-model_v4	Vault protein inter-alpha-trypsin	Planctomycetes bacterium Poly30	1	17.6	1.65e-17	391	3-374 (381)	271-630 (699)
AF-A0A210R4B7-F1-model_v4	Inter-alpha-trypsin inhibitor heavy chain H3	Mizuhopecten yessoensis	1	15.3	7.09e-15	391	11-332 (381)	245-585 (890)
AF-A0A433U6R5-F1-model_v4	Uncharacterized protein	Elysia chlorotica	1	19.4	1.14e-15	391	8-332 (381)	264-606 (963)
AF-A0A2N2JCI5-F1-model_v4	Uncharacterized protein	Deltaproteobacteria bacterium HGW-Deltaproteobacteria-14	1	11.9	5.98e-16	390	1-379 (381)	294-726 (732)
AF-A0A254QKR1-F1-model_v4	VWFA domain-containing protein	Armatimonadetes bacterium Cent15-Ar3	1	14.7	7.09e-15	389	40-379 (381)	3-333 (439)
AF-A0A2V7VZ15-F1-model_v4	Marine proteobacterial sortase target protein	Acidobacteria bacterium	1	16.9	6.64e-14	389	4-291 (381)	285-569 (664)
AF-A0A849NHY6-F1-model_v4	VWA domain-containing protein	Ignavibacteriae bacterium	1	15.9	1.08e-15	389	2-331 (381)	234-550 (677)
AF-A0A2S3IPW1-F1-model_v4	VWFA domain-containing protein	Panicum hallii	1	16.6	1.37e-16	388	2-354 (381)	63-390 (524)
AF-Q21PJ3-F1-model_v4	von Willebrand factor, type A	Saccharophagus degradans 2-40	1	14.6	1.36e-15	388	1-332 (381)	348-672 (763)
AF-A0A842KEH0-F1-model_v4	VWA domain-containing protein	Methanothrix sp.	1	17.6	7.98e-15	388	1-284 (381)	1-315 (766)
AF-A0A1F8JKW0-F1-model_v4	VWFA domain-containing protein	Chlamydiae bacterium RIFCSPHIGHO2_12_FULL_49_11	1	13.3	6.34e-16	388	5-333 (381)	561-882 (892)
AF-Q6UXX5-F1-model_v4	Inter-alpha-trypsin inhibitor heavy chain H6	Homo sapiens	1	15.2	9.58e-16	388	22-332 (381)	267-596 (1313)
AF-A0A524GZP0-F1-model_v4	VWA domain-containing protein	Gemmatimonadales bacterium	1	19.2	3.96e-16	387	1-332 (381)	157-475 (650)
AF-A0A4R5WVB4-F1-model_v4	VWA domain-containing protein	Mycobacterium paragordonae	1	17.1	3.5e-15	387	4-302 (381)	266-563 (851)
AF-A0A7C7LBB8-F1-model_v4	VWA domain-containing protein	Candidatus Poribacteria bacterium	1	24.5	7.73e-10	386	39-199 (381)	42-203 (228)
AF-A0A7Y6UHD9-F1-model_v4	VWA domain-containing protein	Kofleriaceae bacterium	1	16.1	1.29e-15	386	1-332 (381)	217-545 (608)
AF-A0A672LP18-F1-model_v4	Inter-alpha-trypsin inhibitor heavy chain H6-like	Sinocyclocheilus grahami	1	18.1	3.94e-15	386	12-332 (381)	208-550 (880)
AF-A0A2W4P5Y4-F1-model_v4	Marine proteobacterial sortase target protein	Proteobacteria bacterium	1	15.6	2.18e-15	385	11-334 (381)	70-384 (465)
AF-A0A3B6DJY1-F1-model_v4	Uncharacterized protein	Triticum aestivum	1	14.2	4.2e-16	385	2-376 (381)	95-474 (524)
AF-A0A661YPV0-F1-model_v4	Protein TonB	Bacteroidetes bacterium	1	18.4	1.63e-15	385	4-334 (381)	50-376 (568)
AF-A0A2V2SGN8-F1-model_v4	Uncharacterized protein	Verrucomicrobia bacterium	1	17.1	8.51e-16	385	1-308 (381)	267-566 (766)
AF-A0A251TP35-F1-model_v4	VWFA domain-containing protein	Helianthus annuus	1	17.6	8.97e-15	385	2-324 (381)	371-689 (835)
AF-A0A4Y6J0Q0-F1-model_v4	Marine proteobacterial sortase target protein	Shewanella marisflavi	1	13.9	7.09e-15	384	2-305 (381)	335-643 (750)
AF-A0A535FHG5-F1-model_v4	VWA domain-containing protein	Chloroflexi bacterium	1	18.9	4.61e-12	383	3-199 (381)	5-213 (229)
AF-A0A7V2TQ98-F1-model_v4	VWA domain-containing protein	Candidatus Hydrogenedentes bacterium	1	18.4	8.97e-15	383	3-334 (381)	253-577 (586)
AF-A0A7Y2F764-F1-model_v4	VWA domain-containing protein	Pirellulaceae bacterium	1	14.1	1.38e-17	383	1-378 (381)	212-615 (618)
AF-A0A835YID7-F1-model_v4	Uncharacterized protein	Edaphochlamys debaryana	1	16.4	1.07e-14	383	2-332 (381)	229-584 (709)
AF-A0A0S8K3M2-F1-model_v4	Uncharacterized protein	Bacteroides sp. SM23_62	1	15.2	4.98e-15	383	3-332 (381)	235-570 (709)
AF-A0A667YAF4-F1-model_v4	Inter-alpha-trypsin inhibitor heavy chain family member 6	Myripristis murdjan	1	16.7	2.06e-15	383	11-332 (381)	208-548 (847)
AF-A0A524KGV3-F1-model_v4	VWA domain-containing protein	Gemmatimonadales bacterium	1	20	5.6e-15	382	38-332 (381)	3-291 (532)
AF-W9R7W9-F1-model_v4	VWFA domain-containing protein	Morus notabilis	1	14.9	7.62e-17	381	1-285 (381)	27-342 (355)
AF-A0A1G2Y3F7-F1-model_v4	VWA domain-containing protein	Planctomycetes bacterium GWF2_41_51	1	16.9	5.67e-17	381	1-373 (381)	262-619 (672)
AF-A0A538UD27-F1-model_v4	VWA domain-containing protein	Candidatus Eisenbacteria bacterium	1	17.3	3.71e-15	381	7-332 (381)	269-587 (794)
AF-A0A6C0EWD6-F1-model_v4	VWFA domain-containing protein	viral metagenome	1	13.9	5.28e-15	378	5-377 (381)	9-459 (561)
AF-A0A2T8I4K0-F1-model_v4	VWFA domain-containing protein	Panicum hallii	1	16.1	1.22e-16	378	2-354 (381)	125-452 (586)
AF-A0A7X8MEI8-F1-model_v4	VWA domain-containing protein	Clostridium sp.	1	17	1.36e-15	378	2-281 (381)	512-821 (939)
AF-A0A847G7R6-F1-model_v4	VWA domain-containing protein	Candidatus Hydrogenedens sp.	1	16.2	1.14e-14	377	2-334 (381)	250-575 (584)
AF-A0A356F9G9-F1-model_v4	Uncharacterized protein	Planctomycetota bacterium	1	17	2.61e-15	377	7-332 (381)	284-608 (785)
AF-A0A6N8YY36-F1-model_v4	DUF3520 domain-containing protein	Chloroflexi bacterium	1	12.7	7.22e-18	376	1-378 (381)	272-668 (683)
AF-A0A5S9F177-F1-model_v4	VWFA domain-containing protein	Candidatus Uabimicrobium amorphum	1	14.9	2.07e-16	376	4-352 (381)	150-524 (777)
AF-A0A7V8IXX4-F1-model_v4	Chloride	Planctomycetota bacterium	1	27.9	8.75e-11	375	29-199 (381)	81-255 (511)
AF-A0A357I730-F1-model_v4	Marine proteobacterial sortase target protein	Gammaproteobacteria bacterium	1	17.5	7.52e-15	375	2-332 (381)	287-598 (682)
AF-A0A1J0AAI8-F1-model_v4	von Willebrand factor type A domain protein	Gloeomargarita lithophora Alchichica-D10	1	19.3	5.94e-15	374	1-282 (381)	238-516 (775)
AF-K6Y8P8-F1-model_v4	Uncharacterized protein	Glaciecola pallidula DSM 14239 = ACAM 615	1	16.6	6.69e-15	374	4-304 (381)	362-661 (821)
AF-A0A3N5Z2P6-F1-model_v4	VWA domain-containing protein	Acidobacteria bacterium	1	18	5.91e-14	373	1-289 (381)	117-406 (559)
AF-A0A7X7MPH5-F1-model_v4	VWA domain-containing protein	Lentisphaerae bacterium	1	15.1	1.2e-14	373	5-334 (381)	298-623 (635)
AF-A0A2S6FZK7-F1-model_v4	Ca-activated chloride channel family protein	Clostridium algidicarnis DSM 15099	1	16.3	2.78e-16	373	1-332 (381)	221-540 (795)
AF-A0A7Y2VK38-F1-model_v4	VWA domain-containing protein	Xanthomonadales bacterium	1	16.4	2.17e-14	372	1-330 (381)	1-307 (400)
AF-A0A3B8UFM0-F1-model_v4	VWFA domain-containing protein	Parachlamydiales bacterium	1	13.8	5.28e-15	371	5-337 (381)	238-570 (575)
AF-A0A401UTN4-F1-model_v4	Uncharacterized protein	Clostridium tagluense	1	13.9	1.83e-15	371	20-334 (381)	244-549 (774)
AF-A0A520Q421-F1-model_v4	VWA domain-containing protein	Sandaracinaceae bacterium	1	20	6.73e-16	371	1-324 (381)	680-994 (1203)
AF-A0A6M1ZJZ9-F1-model_v4	VWFA domain-containing protein	Candidatus Anoxychlamydiales bacterium	1	13.4	4.98e-15	370	3-326 (381)	243-571 (580)
AF-A0A7Y5LPT8-F1-model_v4	Uncharacterized protein	Myxococcales bacterium	1	10.3	5.98e-16	370	1-378 (381)	345-761 (767)
AF-C3YPR2-F1-model_v4	Uncharacterized protein	Branchiostoma floridae	1	16.9	1.72e-14	370	11-332 (381)	207-547 (863)
AF-A0A4Q5P5A9-F1-model_v4	VWA domain-containing protein	bacterium	1	17.8	2.93e-15	369	1-302 (381)	7-317 (342)
AF-A0A6M1ZVA9-F1-model_v4	VWFA domain-containing protein	Candidatus Anoxychlamydiales bacterium	1	13.6	5.94e-15	368	3-333 (381)	240-567 (576)
AF-A0A2W5SY08-F1-model_v4	Uncharacterized protein	Archangium gephyra	1	17.6	3.71e-15	368	22-332 (381)	378-672 (900)
AF-A0A7M7REW3-F1-model_v4	Uncharacterized protein	Strongylocentrotus purpuratus	1	15.5	3.71e-15	368	11-332 (381)	300-681 (1016)
AF-A0A7W0WTK0-F1-model_v4	VWA domain-containing protein	Deltaproteobacteria bacterium	1	17.7	2.06e-15	366	1-334 (381)	304-620 (723)
AF-A0A2A4RSJ3-F1-model_v4	Uncharacterized protein	Flavobacteriaceae bacterium	1	16.8	8.97e-15	365	4-332 (381)	254-567 (1030)
AF-S8CGJ4-F1-model_v4	VWFA domain-containing protein	Genlisea aurea	1	17.1	5.57e-14	364	5-334 (381)	293-619 (637)
AF-A0A2Z7BG22-F1-model_v4	Uncharacterized protein	Dorcoceras hygrometricum	1	12.1	4.43e-15	364	4-369 (381)	259-605 (649)
AF-A0A7W0VJI9-F1-model_v4	VWA domain-containing protein	Deltaproteobacteria bacterium	1	15.6	3.5e-15	363	13-334 (381)	276-596 (845)
AF-A0A845FRV3-F1-model_v4	Marine proteobacterial sortase target protein	Pseudomaricurvus sp. HS19	1	16.5	3.94e-15	362	1-332 (381)	336-656 (737)
AF-H5SVF7-F1-model_v4	Uncharacterized protein	Candidatus Acetothermum autotrophicum	1	18.3	2.62e-16	361	3-284 (381)	29-332 (701)
AF-A0A7W1TVJ8-F1-model_v4	VWA domain-containing protein	Acidobacteria bacterium	1	24	1.98e-09	359	30-199 (381)	400-573 (588)
AF-A0A3P8QBF5-F1-model_v4	Inter-alpha-trypsin inhibitor heavy chain 3	Astatotilapia calliptera	1	16.3	2.75e-14	359	10-327 (381)	230-549 (770)
AF-K0ELF9-F1-model_v4	Inter-alpha-trypsin inhibitor domain-containing protein	Alteromonas macleodii str. 'Balearic Sea AD45'	1	15.3	1.07e-14	358	1-332 (381)	228-553 (640)
AF-A0A315X3V0-F1-model_v4	VWFA domain-containing protein	Dehalococcoidia bacterium	1	15	9.03e-16	357	8-283 (381)	35-306 (644)
AF-A0A5R8KCG6-F1-model_v4	DUF3520 domain-containing protein	Phragmitibacter flavus	1	15.1	3.32e-16	357	1-345 (381)	393-800 (806)
AF-R6Y2F2-F1-model_v4	von Willebrand factor type A	Firmicutes bacterium CAG:345	1	13.5	1.64e-16	356	1-345 (381)	113-482 (489)
AF-A0A2V9P8K8-F1-model_v4	VWFA domain-containing protein	Acidobacteria bacterium	1	18.4	2.06e-15	356	1-341 (381)	138-470 (673)
AF-A0A518LEK6-F1-model_v4	von Willebrand factor	Planctomycetes bacterium TBK1r	1	16.7	1.29e-15	356	1-349 (381)	424-826 (830)
AF-A0A7J5EHF6-F1-model_v4	VWA domain-containing protein	Kofleriaceae bacterium	1	18	1.52e-14	355	5-264 (381)	51-337 (341)
AF-A0A1I0XW94-F1-model_v4	Ca-activated chloride channel family protein	Clostridium frigidicarnis	1	16.4	8.03e-16	355	4-375 (381)	223-546 (784)
AF-A0A180EHK3-F1-model_v4	Uncharacterized protein	Lewinella sp. 4G2	1	15.8	1.44e-14	355	4-332 (381)	263-604 (1058)
AF-A0A3A4K929-F1-model_v4	VWA domain-containing protein	Myxococcales bacterium	1	17.6	4.2e-16	354	2-374 (381)	211-584 (585)
AF-A0A7S3Z428-F1-model_v4	Hypothetical protein	Lotharella globosa	1	20	1.14e-14	354	2-332 (381)	185-526 (863)
AF-A0A836S2S1-F1-model_v4	Marine proteobacterial sortase target protein	Thiotrichales bacterium	1	15.6	2.06e-15	353	1-332 (381)	301-610 (691)
AF-A0A437QKE5-F1-model_v4	Marine proteobacterial sortase target protein	Hwanghaeella grinnelliae	1	14.8	3.48e-14	353	4-332 (381)	322-639 (737)
AF-A0A6M1Y6Y5-F1-model_v4	VWA domain-containing protein	Wenzhouxiangella sp. XN24	1	16.3	1.43e-13	352	1-332 (381)	285-601 (695)
AF-A0A1M7XWS3-F1-model_v4	Ca-activated chloride channel family protein	Desulfopila aestuarii DSM 18488	1	16.1	5.94e-15	352	1-332 (381)	325-636 (717)
AF-A0A356VDJ8-F1-model_v4	Marine proteobacterial sortase target protein	Halieaceae bacterium	1	16	3.3e-15	352	7-334 (381)	332-646 (732)
AF-A0A258AVL0-F1-model_v4	VWFA domain-containing protein	Verrucomicrobia bacterium 12-59-8	1	15.7	1.36e-15	352	1-350 (381)	451-858 (859)
AF-A0A7W4YC34-F1-model_v4	Ca-activated chloride channel family protein	Cellulomonas cellasea	1	16.2	1.97e-17	351	3-344 (381)	111-494 (499)
AF-A0A351IP13-F1-model_v4	VWFA domain-containing protein	Parachlamydiales bacterium	1	15.1	2.61e-15	350	5-354 (381)	269-602 (609)
AF-A0A351B0A6-F1-model_v4	Uncharacterized protein	Desulfobacterales bacterium	1	15.7	4.69e-15	349	4-285 (381)	23-299 (523)
AF-A0A352M2D4-F1-model_v4	Uncharacterized protein	Candidatus Wallbacteria bacterium	1	16.5	1.83e-15	349	12-334 (381)	167-484 (728)
AF-A0A6H1UGI3-F1-model_v4	VWA domain-containing protein	Ferrimonas lipolytica	1	17.2	6.64e-14	349	6-290 (381)	231-510 (748)
AF-A0A1F4S1K3-F1-model_v4	Uncharacterized protein	candidate division WOR-1 bacterium RIFOXYB2_FULL_36_35	1	15.8	2.76e-15	349	1-332 (381)	306-619 (1000)
AF-A0A2W4LNG8-F1-model_v4	VWA domain-containing protein	Chloroflexi bacterium	1	22.7	1.26e-12	348	3-242 (381)	5-259 (260)
AF-A0A3M1UGS0-F1-model_v4	VWA domain-containing protein	Euryarchaeota archaeon	1	16.9	6.73e-16	348	7-332 (381)	217-533 (610)
AF-A0A4R7PE46-F1-model_v4	Ca-activated chloride channel family protein	Panacagrimonas perspica	1	14.9	4.2e-16	348	1-359 (381)	236-646 (646)
AF-A0A7L4P2B0-F1-model_v4	DUF11 domain-containing protein	Methanobacteriaceae archaeon	1	16.9	5.98e-16	348	5-282 (381)	16-326 (1217)
AF-A0A495X8Q4-F1-model_v4	Tight adherence protein B	Saccharothrix variisporea	1	18.3	6.69e-15	347	2-285 (381)	30-294 (620)
AF-A0A095VT49-F1-model_v4	Inter-alpha-trypsin inhibitor domain protein	Pseudohaliea rubra DSM 19751	1	16.1	8.97e-15	347	7-332 (381)	299-607 (688)
AF-A0A838SGV7-F1-model_v4	VWA domain-containing protein	Nitrospirales bacterium	1	18.3	1.52e-14	346	2-324 (381)	312-627 (769)
AF-A0A357TA12-F1-model_v4	Uncharacterized protein	Clostridiaceae bacterium	1	15.8	7.09e-15	346	1-332 (381)	220-540 (795)
AF-A0A4P5W195-F1-model_v4	VWFA domain-containing protein	Deltaproteobacteria bacterium	1	16.4	3.13e-16	346	1-332 (381)	336-698 (796)
AF-A0A259E3P7-F1-model_v4	Uncharacterized protein	Thiotrichales bacterium 17-46-47	1	15.3	4.15e-14	344	1-290 (381)	246-528 (768)
AF-A0A1M3KXK8-F1-model_v4	VWFA domain-containing protein	'Candidatus Kapabacteria' thiocyanatum	1	17.9	7.05e-14	343	2-332 (381)	228-544 (679)
AF-A0A1F6CSC6-F1-model_v4	VWFA domain-containing protein	Candidatus Handelsmanbacteria bacterium RIFCSPLOWO2_12_FULL_64_10	1	17.2	1.72e-14	342	4-282 (381)	3-279 (669)
AF-A0A431LK60-F1-model_v4	VWA domain-containing protein	Candidatus Melainabacteria bacterium	1	14.5	1.72e-14	342	4-332 (381)	271-601 (901)
AF-A0A2V9QAG9-F1-model_v4	Marine proteobacterial sortase target protein	Acidobacteria bacterium	1	19.6	1.63e-15	341	6-332 (381)	299-614 (698)
AF-A0A0X3U5Y0-F1-model_v4	Uncharacterized protein	Microbulbifer sp. ZGT114	1	17	2.05e-14	341	1-286 (381)	238-511 (789)
AF-A0A1J5CZW5-F1-model_v4	Uncharacterized protein	Deltaproteobacteria bacterium CG2_30_63_29	1	18.1	3.94e-15	341	7-332 (381)	334-652 (883)
AF-A0A838KLC2-F1-model_v4	Type II secretion system F family protein	Nocardioidaceae bacterium	1	16.3	2.05e-14	340	8-284 (381)	30-300 (645)
AF-A0A512MCT3-F1-model_v4	VWFA domain-containing protein	Brevifollis gellanilyticus	1	15.2	5.94e-15	340	1-344 (381)	490-895 (899)
AF-A0A1V4QZV3-F1-model_v4	VWFA domain-containing protein	Candidatus Latescibacteria bacterium 4484_107	1	19.7	4.12e-13	339	31-282 (381)	28-279 (410)
AF-A7SV91-F1-model_v4	Predicted protein	Nematostella vectensis	1	16.6	7.52e-15	339	2-308 (381)	236-559 (614)
AF-A0A3S9L5C8-F1-model_v4	Vault protein inter-alpha-trypsin	Shewanella khirikhana	1	14.3	4.64e-13	339	2-314 (381)	317-618 (723)
AF-A0A7X7UBY8-F1-model_v4	VWA domain-containing protein	Myxococcales bacterium	1	15.7	9.52e-15	339	2-334 (381)	246-586 (779)
AF-E6TR32-F1-model_v4	von Willebrand factor type A	Evansella cellulosilytica DSM 2522	1	17.6	7.93e-14	338	5-249 (381)	5-278 (282)
AF-A0A3M6TA64-F1-model_v4	Uncharacterized protein	Pocillopora damicornis	1	19.1	6.96e-12	338	20-249 (381)	270-505 (1184)
AF-A0A2T6C8F6-F1-model_v4	von Willebrand factor type A domain-containing protein	Melghirimyces profundicolus	1	14.6	8.46e-15	337	17-334 (381)	6-313 (555)
AF-A0A4Y1X005-F1-model_v4	VWFA domain-containing protein	Alistipes dispar	1	15.5	1.63e-15	337	1-326 (381)	206-579 (669)
AF-A0A7C7I5C0-F1-model_v4	Marine proteobacterial sortase target protein	Candidatus Marinimicrobia bacterium	1	18.2	8.41e-14	337	6-302 (381)	295-587 (707)
AF-A0A2D7S4K9-F1-model_v4	Marine proteobacterial sortase target protein	Legionellales bacterium	1	14.7	3.09e-14	337	6-332 (381)	340-654 (738)
AF-A0A444T9Q3-F1-model_v4	von Willebrand factor A domain-containing protein 5A	Armadillidium vulgare	1	18.5	1.14e-14	336	6-282 (381)	76-358 (358)
AF-A0A7C7M1T8-F1-model_v4	VWA domain-containing protein	Candidatus Marinimicrobia bacterium	1	18.2	3.26e-13	335	24-282 (381)	27-277 (323)
AF-A0A7C3C7Q6-F1-model_v4	VWA domain-containing protein	Bryobacterales bacterium	1	18.4	5.91e-14	335	4-264 (381)	185-489 (494)
AF-A0A4Q6EU52-F1-model_v4	DUF3520 domain-containing protein	Moraxellaceae bacterium	1	12	5.94e-15	335	1-351 (381)	131-530 (537)
AF-A0A6L6AUR5-F1-model_v4	VWA domain-containing protein	Actinomycetia bacterium	1	25	3.81e-10	335	30-200 (381)	23-196 (537)
AF-A0A7V3WF34-F1-model_v4	VWA domain-containing protein	Armatimonadetes bacterium	1	11.1	1.73e-15	335	1-381 (381)	264-777 (787)
AF-A0A7Y5F9N1-F1-model_v4	VWA domain-containing protein	Candidatus Hydrogenedentes bacterium	1	17.8	2.44e-14	335	4-332 (381)	297-618 (829)
AF-A0A6G6KFA6-F1-model_v4	VWA domain-containing protein	Roseimicrobium sp. ORNL1	1	15.6	5.28e-15	334	1-345 (381)	149-559 (566)
AF-A0A372RKN4-F1-model_v4	VWFA domain-containing protein	Rhizophagus sp. MUCL 43196	1	17.7	2.46e-15	333	4-334 (381)	36-389 (633)
AF-A0A165JGN8-F1-model_v4	Uncharacterized protein	Alcanivorax sp. HI0044	1	13.8	1.34e-12	333	4-332 (381)	263-572 (654)
AF-A0A651GUT5-F1-model_v4	VWA domain-containing protein	Nitriliruptor sp.	1	14.5	1.52e-13	332	2-287 (381)	47-335 (407)
AF-A0A6B2KZF8-F1-model_v4	Uncharacterized protein	Arcella intermedia	1	19.9	6.3e-15	332	3-324 (381)	49-376 (673)
AF-A0A1R2BCN5-F1-model_v4	Uncharacterized protein	Stentor coeruleus	1	17.3	3.09e-14	332	16-312 (381)	223-522 (720)
AF-A0A3D2TK25-F1-model_v4	VWFA domain-containing protein	Planctomycetaceae bacterium	1	15.6	4.98e-15	332	7-354 (381)	32-424 (838)
AF-A0A517Z743-F1-model_v4	VWFA domain-containing protein	Maioricimonas rarisocia	1	16.6	5.64e-16	332	4-341 (381)	27-386 (864)
AF-A0A7Y2II53-F1-model_v4	VWA domain-containing protein	Acidimicrobiales bacterium	1	16.2	5.57e-14	331	10-282 (381)	38-305 (318)
AF-A0A6I4W7M3-F1-model_v4	VWA domain-containing protein	Actinomadura rayongensis	1	17.1	1.42e-12	331	10-285 (381)	267-546 (818)
AF-A0A353Z8P6-F1-model_v4	VWFA domain-containing protein	Planctomycetaceae bacterium	1	17.1	7.57e-16	330	7-331 (381)	187-530 (537)
AF-A0A321M294-F1-model_v4	Uncharacterized protein	Candidatus Angelobacter sp. Gp1-AA117	1	20.5	1.62e-14	330	1-324 (381)	309-630 (860)
AF-A0A517SAJ8-F1-model_v4	VWFA domain-containing protein	Caulifigura coniformis	1	13.4	5.31e-16	329	1-331 (381)	21-364 (825)
AF-A0A831K3T2-F1-model_v4	VWA domain-containing protein	Euryarchaeota archaeon	1	19.3	2.7e-11	328	1-247 (381)	230-480 (480)
AF-A0A836Q4S0-F1-model_v4	VWA domain-containing protein	Candidatus Melainabacteria bacterium	1	17	7.05e-14	328	6-334 (381)	40-373 (632)
AF-A0A2N2IV35-F1-model_v4	VWFA domain-containing protein	Deltaproteobacteria bacterium HGW-Deltaproteobacteria-20	1	15.7	3.69e-14	328	4-332 (381)	410-722 (750)
AF-A0A7V9PIT3-F1-model_v4	VWA domain-containing protein	Gemmatimonadales bacterium	1	17.8	3.03e-11	327	4-245 (381)	299-547 (549)
AF-A0A1A6BB44-F1-model_v4	Uncharacterized protein	Mycobacterium gordonae	1	13.3	1.01e-14	327	4-376 (381)	230-702 (718)
AF-A0A1Y5D1R2-F1-model_v4	Marine proteobacterial sortase target protein	Colwellia sp. 39_35_sub15_T18	1	14.5	1.06e-13	327	1-332 (381)	323-653 (736)
AF-A0A453ACU3-F1-model_v4	VWFA domain-containing protein	Aegilops tauschii subsp. strangulata	1	14.6	1.14e-15	326	1-359 (381)	241-659 (725)
AF-A0A3D0NAY8-F1-model_v4	VWFA domain-containing protein	Planctomycetaceae bacterium	1	13.9	1.45e-15	326	4-373 (381)	27-394 (834)
AF-A4A146-F1-model_v4	VWFA domain-containing protein	Blastopirellula marina DSM 3645	1	15.7	2.59e-14	326	4-351 (381)	2-366 (1270)
AF-A0A7C1EIR1-F1-model_v4	VWA domain-containing protein	Chloroflexi bacterium	1	15.6	3.45e-13	325	7-278 (381)	32-301 (335)
AF-A0A7G1IIG8-F1-model_v4	Uncharacterized protein	Mycobacterium kansasii	1	17.5	2.05e-14	325	4-332 (381)	265-582 (870)
AF-A0A6A2ZAX8-F1-model_v4	TMEM184C protein	Hibiscus syriacus	1	16.4	6.6e-13	322	28-336 (381)	3-300 (420)
AF-A0A849E1S6-F1-model_v4	VWA domain-containing protein	Enterobacterales bacterium	1	16.2	8.46e-15	322	1-346 (381)	173-572 (573)
AF-A0A0L8GT62-F1-model_v4	Uncharacterized protein	Octopus bimaculoides	1	15.5	2.59e-14	322	4-305 (381)	230-538 (715)
AF-A0A497TUI0-F1-model_v4	Alpha-1-antitrypsin	bacterium endosymbiont of Escarpia laminata	1	16.8	4.64e-13	322	13-285 (381)	235-509 (732)
AF-A0A2M7UHS7-F1-model_v4	VWFA domain-containing protein	Candidatus Portnoybacteria bacterium CG_4_10_14_0_2_um_filter_39_11	1	25	9.79e-10	321	32-199 (381)	2-178 (222)
AF-B1N2W4-F1-model_v4	VWFA domain-containing protein	Entamoeba histolytica	1	13.2	1.2e-13	321	7-327 (381)	55-354 (565)
AF-A0A3E0MY21-F1-model_v4	VWA domain-containing protein	Planctomycetota bacterium	1	17.9	4.17e-15	321	1-379 (381)	34-485 (832)
AF-A0A0S8H477-F1-model_v4	VIT domain-containing protein	Phycisphaerae bacterium SM23_33	1	13.2	2.16e-13	321	4-316 (381)	237-541 (962)
AF-A0A662SJP9-F1-model_v4	VWFA domain-containing protein	Candidatus Korarchaeota archaeon	1	22.2	5.43e-10	320	23-200 (381)	134-324 (371)
AF-A0A7M3MTD9-F1-model_v4	VWA domain-containing protein	Nitriliruptor sp.	1	15.4	7.05e-14	320	8-286 (381)	60-347 (421)
AF-A0A175JX50-F1-model_v4	Uncharacterized protein	Entamoeba histolytica	1	13.1	2.57e-13	320	13-324 (381)	187-480 (577)
AF-A0A7C7VVU8-F1-model_v4	VWA domain-containing protein	Candidatus Korarchaeota archaeon	1	20.6	2.25e-10	319	23-200 (381)	74-264 (311)
AF-A0A497TS31-F1-model_v4	VWFA domain-containing protein	bacterium endosymbiont of Escarpia laminata	1	14.9	6.3e-15	319	13-327 (381)	53-354 (543)
AF-A0A3D5NRF2-F1-model_v4	VWFA domain-containing protein	Clostridiaceae bacterium	1	15	1.27e-13	316	1-334 (381)	50-372 (625)
AF-A0A842VMQ5-F1-model_v4	VWA domain-containing protein	Candidatus Lokiarchaeota archaeon	1	16.6	2.16e-13	316	7-284 (381)	330-612 (1091)
AF-A0A523F5M3-F1-model_v4	VWA domain-containing protein	Acidobacteria bacterium	1	16.5	1.27e-13	314	1-285 (381)	26-303 (536)
AF-A0A7C7VRN7-F1-model_v4	VWA domain-containing protein	Anaerolineales bacterium	1	15.1	1.73e-15	314	4-285 (381)	27-408 (641)
AF-A0A7Y2A3K0-F1-model_v4	VWA domain-containing protein	Acidimicrobiia bacterium	1	15.2	3.66e-13	314	2-285 (381)	30-298 (646)
AF-A0A3B1DHH5-F1-model_v4	Uncharacterized protein	hydrothermal vent metagenome	1	16.5	4.64e-13	313	4-332 (381)	369-684 (733)
AF-A0A7K0MWZ6-F1-model_v4	VWA domain-containing protein	Actinomycetia bacterium	1	16.5	1.49e-10	312	7-199 (381)	31-249 (268)
AF-A0A563DTZ0-F1-model_v4	VWA domain-containing protein	Leekyejoonella antrihumi	1	17	9.97e-13	312	6-285 (381)	35-303 (654)
AF-A0A2M8KGD7-F1-model_v4	VWFA domain-containing protein	Candidatus Portnoybacteria bacterium CG10_big_fil_rev_8_21_14_0_10_40_22	1	16.7	1.8e-12	311	8-278 (381)	1-269 (270)
AF-A0A7V0V1Q4-F1-model_v4	VWA domain-containing protein	Anaerolineae bacterium	1	15.8	5.87e-13	311	5-282 (381)	135-408 (408)
AF-A0A2W6EX47-F1-model_v4	VWFA domain-containing protein	Pseudonocardiales bacterium	1	13.4	1.82e-14	310	1-313 (381)	9-328 (640)
AF-A0A650A600-F1-model_v4	VWA domain-containing protein	Halorhabdus sp. CBA1104	1	14.3	7.09e-15	310	1-283 (381)	144-515 (1224)
AF-A0A1W9LWE8-F1-model_v4	VWFA domain-containing protein	Desulfobacteraceae bacterium IS3	1	24.1	1.09e-08	309	38-197 (381)	332-504 (511)
AF-A0A2H6H3B8-F1-model_v4	Bacterial type II secretion system protein F domain protein	bacterium BMS3Bbin01	1	15.7	2.57e-13	309	4-285 (381)	29-299 (646)
AF-A0A0A0IWZ1-F1-model_v4	VWFA domain-containing protein	Knoellia flava TL1	1	16	4.12e-13	307	5-282 (381)	9-282 (638)
AF-A0A6N6T696-F1-model_v4	VWA domain-containing protein	Candidatus Contendobacter sp.	1	12.4	1.13e-13	307	4-308 (381)	206-538 (765)
AF-D2R3Y3-F1-model_v4	von Willebrand factor type A	Pirellula staleyi DSM 6068	1	14	5.04e-17	307	1-349 (381)	336-772 (776)
AF-A0A1I0R0C9-F1-model_v4	Uncharacterized protein	[Clostridium] fimetarium	1	20.6	2.1e-09	306	10-197 (381)	543-723 (1096)
AF-A0A7V3VYU3-F1-model_v4	VWA domain-containing protein	Gemmataceae bacterium	1	14.2	1.92e-13	305	9-331 (381)	123-471 (474)
AF-A0A7Y9RXF0-F1-model_v4	Tight adherence protein B	Nocardioides daedukensis	1	13.2	9.4e-13	305	1-285 (381)	32-293 (640)
AF-A0A7C8U6D6-F1-model_v4	VWFA domain-containing protein	Orbilia oligospora	1	18.6	1.28e-14	304	2-326 (381)	145-519 (741)
AF-A0A171DQJ3-F1-model_v4	Type II secretion system protein	Planomonospora sphaerica	1	15.7	3.45e-13	304	4-285 (381)	107-378 (758)
AF-A0A1E4EKU3-F1-model_v4	Uncharacterized protein	bacterium SCN 62-11	1	16	4.12e-13	304	13-336 (381)	261-569 (892)
AF-A0A2E0SIW8-F1-model_v4	VWFA domain-containing protein	Planctomyces sp.	1	15.5	4.95e-14	304	5-346 (381)	41-392 (895)
AF-A0A139A1H5-F1-model_v4	VWFA domain-containing protein	Gonapodya prolifera JEL478	1	18.8	1.67e-10	303	2-199 (381)	61-276 (499)
AF-A0A831T7V5-F1-model_v4	VWA domain-containing protein	Blastocatellia bacterium	1	16.5	1.12e-12	302	1-284 (381)	81-350 (350)
AF-A0A7C2AA47-F1-model_v4	VWA domain-containing protein	Candidatus Fraserbacteria bacterium	1	18.2	8.97e-15	302	1-285 (381)	27-334 (667)
AF-A0A2H5TAU1-F1-model_v4	von willebrand domain-containing protein	Rhizophagus irregularis DAOM 181602=DAOM 197198	1	16.2	1.35e-13	302	4-332 (381)	245-611 (1173)
AF-A0A7Y2IJS3-F1-model_v4	VWA domain-containing protein	Acidimicrobiia bacterium	1	14.1	9.52e-15	301	1-377 (381)	27-456 (636)
AF-A0A7W1NW65-F1-model_v4	VWA domain-containing protein	Anaerolineae bacterium	1	14.2	2.46e-15	301	4-280 (381)	26-391 (839)
AF-A0A3M2EYZ0-F1-model_v4	VWA domain-containing protein	Deinococcus-Thermus bacterium	1	19.7	3.81e-10	300	30-258 (381)	303-533 (535)
AF-D1CG77-F1-model_v4	von Willebrand factor type A type II secretion system protein	Thermobaculum terrenum ATCC BAA-798	1	15.3	7.43e-13	300	4-285 (381)	33-316 (643)
AF-R9L4A4-F1-model_v4	VWFA domain-containing protein	Lachnospiraceae bacterium MD335	1	17.7	1.61e-13	300	5-293 (381)	423-700 (715)
AF-A0A3N0XPX9-F1-model_v4	Voltage-dependent calcium channel subunit alpha-2/delta-3	Anabarilius grahami	1	19.6	8.15e-09	299	34-199 (381)	114-295 (367)
AF-A0A662I3U9-F1-model_v4	VWFA domain-containing protein	Thermoprotei archaeon	1	24.6	3.18e-09	299	27-200 (381)	227-409 (418)
AF-A0A7V5BPT9-F1-model_v4	VWA domain-containing protein	Anaerolineae bacterium	1	14.4	1.34e-12	299	6-284 (381)	51-325 (523)
AF-A0A2W6E2V4-F1-model_v4	VWFA domain-containing protein	Pseudonocardiales bacterium	1	16.1	2.43e-13	299	4-282 (381)	33-309 (661)
AF-A0A6G7XNY3-F1-model_v4	VWA domain-containing protein	Nocardioides sp. HDW12B	1	15.4	3.5e-15	298	6-370 (381)	7-373 (627)
AF-A0A1X7VQ95-F1-model_v4	Uncharacterized protein	Amphimedon queenslandica	1	17.4	2.57e-13	298	4-284 (381)	243-536 (826)
AF-A0A7J4QHJ8-F1-model_v4	VWA domain-containing protein	Candidatus Woesearchaeota archaeon	1	19.1	5.72e-09	297	23-200 (381)	86-278 (318)
AF-A0A402BUK9-F1-model_v4	VWFA domain-containing protein	Sporomusaceae bacterium	1	23.3	5.72e-09	297	33-199 (381)	402-577 (579)
AF-A0A7C6B326-F1-model_v4	VWA domain-containing protein	Bryobacteraceae bacterium	1	14.5	3.86e-12	297	7-282 (381)	405-676 (685)
AF-A0A6M8WAS4-F1-model_v4	VWA domain-containing protein	Planctomycetota bacterium	1	19.4	4.37e-13	297	4-332 (381)	455-773 (822)
AF-A0A7X8VIP8-F1-model_v4	Cna B-type domain-containing protein	Clostridiaceae bacterium	1	13.5	3.91e-14	297	3-274 (381)	53-429 (1271)
AF-A0A5Q4G0H9-F1-model_v4	VWA domain-containing protein	Nitriliruptor sp.	1	15.5	6.64e-14	296	1-375 (381)	28-423 (639)
AF-A0A7S0GWX5-F1-model_v4	Hypothetical protein	Amorphochlora amoebiformis	1	18.9	2.14e-12	296	4-305 (381)	284-606 (811)
AF-A0A267GSE3-F1-model_v4	Uncharacterized protein	Macrostomum lignano	1	15.7	4.1e-12	296	3-287 (381)	237-531 (816)
AF-M8ALU7-F1-model_v4	Uncharacterized protein	Aegilops tauschii	1	15	2.88e-12	295	30-280 (381)	197-481 (482)
AF-A0A3M2JS65-F1-model_v4	VWA domain-containing protein	Cellulomonas sp. NEAU-YY56	1	23.4	2.49e-08	295	28-199 (381)	509-682 (1094)
AF-A0A7D8BE15-F1-model_v4	VWA domain-containing protein	Granulicella sp. 5B5	1	22.3	5.09e-09	294	38-200 (381)	29-189 (198)
AF-A0A847GCB1-F1-model_v4	VWA domain-containing protein	Candidatus Hydrogenedens sp.	1	18.1	5.5e-12	294	130-380 (381)	18-288 (291)
AF-A0A831KQQ9-F1-model_v4	VWA domain-containing protein	Candidatus Aminicenantes bacterium	1	15.1	9.46e-14	294	10-357 (381)	20-351 (358)
AF-A0A522QQ56-F1-model_v4	VWA domain-containing protein	Jatrophihabitans sp.	1	15.3	1.69e-12	294	9-285 (381)	35-310 (411)
AF-A0A2U3LKJ7-F1-model_v4	Uncharacterized protein	Candidatus Sulfopaludibacter sp. SbA4	1	17.5	7.88e-13	294	6-334 (381)	253-560 (759)
AF-A0A0D2VSI5-F1-model_v4	von Willebrand domain-containing protein	Capsaspora owczarzaki ATCC 30864	1	18	1.91e-12	294	4-280 (381)	259-556 (966)
AF-A0A1F9DK50-F1-model_v4	VWFA domain-containing protein	Deltaproteobacteria bacterium RBG_16_54_18	1	14.2	6.19e-12	293	4-290 (381)	30-314 (355)
AF-A0A847WRE3-F1-model_v4	VWA domain-containing protein	Amphibacillus sp.	1	19.7	2.34e-07	292	34-199 (381)	339-508 (724)
AF-A0A433PRF5-F1-model_v4	Uncharacterized protein	Endogone sp. FLAS-F59071	1	16.1	3.45e-13	292	4-315 (381)	261-602 (905)
AF-A0A7C2XX81-F1-model_v4	VWA domain-containing protein	Chloroflexi bacterium	1	14.8	5.91e-14	291	5-280 (381)	35-403 (674)
AF-A0A255R6P0-F1-model_v4	VWFA domain-containing protein	Rhodopirellula sp. MGV	1	15.4	8.03e-16	291	1-356 (381)	372-784 (791)
AF-A0A6A6K5N8-F1-model_v4	VWFA domain-containing protein	Hevea brasiliensis	1	15.6	3.43e-12	290	4-373 (381)	73-437 (482)
AF-A0A7S1BSN3-F1-model_v4	Hypothetical protein	Corethron hystrix	1	15.6	3.45e-13	290	4-332 (381)	211-550 (633)
AF-A0A7C3NYL7-F1-model_v4	VWA domain-containing protein	Chloroflexi bacterium	1	13.6	5.94e-15	290	1-285 (381)	21-397 (639)
AF-A0A6P2B9M7-F1-model_v4	VWA domain-containing protein	Anaerolineaceae bacterium	1	13	1.14e-14	290	6-280 (381)	35-412 (658)
AF-A0A0A1UFI2-F1-model_v4	Uncharacterized protein	Entamoeba invadens IP1	1	15.1	1.33e-11	290	4-307 (381)	177-491 (686)
AF-A0A0S8KI90-F1-model_v4	Uncharacterized protein	Anaerolineae bacterium SM23_84	1	16.4	1.93e-14	290	7-281 (381)	22-383 (708)
AF-A0A7Y6PYJ3-F1-model_v4	VWA domain-containing protein	Kofleriaceae bacterium	1	21.3	1.97e-08	289	33-199 (381)	187-357 (363)
AF-A0A7Y2D9S0-F1-model_v4	VWA domain-containing protein	Acidimicrobiales bacterium	1	15.9	2.02e-12	289	4-285 (381)	43-316 (659)
AF-A0A0A1U9P0-F1-model_v4	Uncharacterized protein	Entamoeba invadens IP1	1	16.2	1.11e-11	289	6-316 (381)	191-476 (706)
AF-A0A2I1G2M3-F1-model_v4	VWA-like protein	Rhizophagus irregularis	1	16	5.22e-13	288	4-315 (381)	211-548 (588)
AF-A0A2N3GBY9-F1-model_v4	VWFA domain-containing protein	Actinobacteria bacterium HGW-Actinobacteria-10	1	15.5	8.3e-12	288	8-284 (381)	29-301 (638)
AF-A0A0D2AQT3-F1-model_v4	Uncharacterized protein	Verruconis gallopava	1	15	2.29e-13	288	5-284 (381)	261-608 (989)
AF-A0A6I7R322-F1-model_v4	DUF1573 domain-containing protein	Chitinophagaceae bacterium	1	22.9	9.17e-09	287	34-199 (381)	273-451 (462)
AF-A0A7Y6PTI0-F1-model_v4	VWA domain-containing protein	Kofleriaceae bacterium	1	14.8	6.23e-13	287	5-279 (381)	216-501 (661)
AF-A0A7V7WYZ7-F1-model_v4	VWA domain-containing protein	Burkholderiaceae bacterium	1	15.7	1.69e-12	287	4-281 (381)	191-507 (754)
AF-A0A1Q9NJ17-F1-model_v4	Uncharacterized protein	Candidatus Heimdallarchaeota archaeon LC_2	1	12	2.32e-15	287	2-282 (381)	118-513 (772)
AF-A0A3A0GA29-F1-model_v4	VWFA domain-containing protein	Proteobacteria bacterium	1	18.1	4.77e-08	286	36-197 (381)	377-547 (554)
AF-A0A5J9WKE8-F1-model_v4	Uncharacterized protein	Eragrostis curvula	1	12.9	4.61e-12	286	1-375 (381)	189-499 (570)
AF-A0A0L0FNI6-F1-model_v4	Uncharacterized protein	Sphaeroforma arctica JP610	1	17.7	1.51e-12	286	4-279 (381)	232-549 (922)
AF-G4KVI3-F1-model_v4	VWFA domain-containing protein	Oscillibacter valericigenes Sjm18-20	1	14.9	3.43e-12	286	2-284 (381)	435-700 (931)
AF-Q233Q0-F1-model_v4	Type A von willebrand factor domain protein	Tetrahymena thermophila SB210	1	17.2	1.69e-12	285	4-280 (381)	235-566 (853)
AF-A0A2E1AH64-F1-model_v4	VWFA domain-containing protein	Anaerolineaceae bacterium	1	14.7	5.91e-14	285	1-279 (381)	35-401 (1009)
AF-A0A096LST6-F1-model_v4	Poly [ADP-ribose] polymerase	Poecilia formosa	1	17	2.88e-12	285	6-304 (381)	690-985 (1120)
AF-A0A3E2ETK8-F1-model_v4	DUF3520 domain-containing protein	Adlercreutzia equolifaciens	1	12.9	4.4e-14	284	1-379 (381)	61-444 (456)
AF-A0A349B4S9-F1-model_v4	VWFA domain-containing protein	Acidimicrobiaceae bacterium	1	16.1	7.05e-14	284	2-373 (381)	34-384 (632)
AF-A0A7V9B731-F1-model_v4	VWA domain-containing protein	Chloroflexia bacterium	1	23.2	7.68e-09	284	28-219 (381)	401-609 (858)
AF-A0A0L0FZI7-F1-model_v4	Uncharacterized protein	Sphaeroforma arctica JP610	1	15.5	5.22e-13	284	11-332 (381)	232-599 (877)
AF-A0A661SVC9-F1-model_v4	VWFA domain-containing protein	Deltaproteobacteria bacterium	1	14.9	1.81e-13	283	10-289 (381)	23-320 (455)
AF-A2EPF5-F1-model_v4	von Willebrand factor type A domain containing protein	Trichomonas vaginalis	1	15.8	1.6e-12	283	5-332 (381)	217-518 (688)
AF-A0A521J4Z8-F1-model_v4	VWA domain-containing protein	Gottschalkiaceae bacterium	1	15.2	2.27e-12	283	6-285 (381)	487-761 (800)
AF-A0A3Q0SU44-F1-model_v4	Poly [ADP-ribose] polymerase	Amphilophus citrinellus	1	16.6	5.19e-12	283	4-304 (381)	734-1023 (1231)
AF-A0A1J4ZTM7-F1-model_v4	VWFA domain-containing protein	Anaerolineae bacterium CG2_30_58_95	1	12.8	2.14e-12	282	7-283 (381)	33-313 (416)
AF-W7HXN5-F1-model_v4	Uncharacterized protein	Drechslerella stenobrocha 248	1	15	2.14e-12	282	4-305 (381)	277-642 (1031)
AF-A0A542NEC9-F1-model_v4	Tight adherence protein B	Nocardioides sp. SLBN-172	1	21.9	1.65e-08	281	37-199 (381)	44-205 (544)
AF-A0A3M1ENQ6-F1-model_v4	Extracellular solute-binding protein	Caldilineae bacterium	1	25.1	6.79e-08	281	36-193 (381)	400-571 (574)
AF-A0A7J9WEE0-F1-model_v4	VWA domain-containing protein	Nitriliruptorales bacterium	1	12.4	3.45e-13	281	2-368 (381)	28-413 (635)
AF-A0A3M2AFH8-F1-model_v4	Uncharacterized protein	Deltaproteobacteria bacterium	1	11.5	5.83e-12	281	5-332 (381)	455-776 (1261)
AF-A0A1H3X8N6-F1-model_v4	Mg-chelatase subunit ChlD	Oribacterium sp. KHPX15	1	14.9	6.19e-12	280	2-301 (381)	426-704 (714)
AF-A0A062XTJ4-F1-model_v4	Uncharacterized protein	Thermoanaerobaculum aquaticum	1	15.7	4.61e-12	280	4-332 (381)	242-564 (835)
AF-A6CDV7-F1-model_v4	VWFA domain-containing protein	Gimesia maris DSM 8797	1	15.1	1.92e-13	280	7-354 (381)	29-397 (901)
AF-A0A0G4FT55-F1-model_v4	Uncharacterized protein	Vitrella brassicaformis CCMP3155	1	16.7	1.6e-12	278	21-305 (381)	324-685 (1009)
AF-A0A2V8FS66-F1-model_v4	VWFA domain-containing protein	Acidobacteria bacterium	1	17.6	5.69e-08	277	27-199 (381)	80-255 (259)
AF-A0A315DAC1-F1-model_v4	Uncharacterized protein	Limnohabitans sp. 2KL-51	1	16	2.88e-12	277	4-304 (381)	159-452 (684)
AF-A0A2H6GPY4-F1-model_v4	FHA domain-containing protein FhaB	bacterium BMS3Abin14	1	15.4	2.56e-12	277	22-320 (381)	347-638 (705)
AF-A0A433A0U1-F1-model_v4	von Willebrand factor type A domain-containing protein	Jimgerdemannia flammicorona	1	16	4.92e-13	277	4-305 (381)	15-364 (854)
AF-A0A3D0ESC2-F1-model_v4	VWFA domain-containing protein	Betaproteobacteria bacterium	1	19.1	1.39e-09	277	31-259 (381)	403-639 (856)
AF-M2STQ3-F1-model_v4	Uncharacterized protein	Bipolaris maydis C5	1	17.3	1.12e-12	277	5-305 (381)	257-610 (914)
AF-A0A538S029-F1-model_v4	VIT domain-containing protein	Planctomycetota bacterium	1	11.1	2.88e-12	277	7-305 (381)	462-749 (945)
AF-A0A7Y5L286-F1-model_v4	VWA domain-containing protein	Ignavibacteriaceae bacterium	1	13.3	1.13e-13	276	4-358 (381)	18-378 (509)
AF-A0A848DN17-F1-model_v4	VWA domain-containing protein	Pseudonocardia bannensis	1	13.9	4.37e-13	276	8-309 (381)	32-338 (642)
AF-A0A7C3WIY1-F1-model_v4	VWA domain-containing protein	Desulfobacca acetoxidans	1	15.9	4.1e-12	276	4-334 (381)	244-566 (769)
AF-A0A7D5P7Y3-F1-model_v4	VWA domain-containing protein	Halosimplex rubrum	1	14.6	1.61e-13	276	5-283 (381)	90-456 (804)
AF-A0A152A0G6-F1-model_v4	VWFA domain-containing protein	Tieghemostelium lacteum	1	13	8.41e-14	276	3-367 (381)	25-451 (1130)
AF-A0A7Y6UHU2-F1-model_v4	VWA domain-containing protein	Kofleriaceae bacterium	1	13.3	1.78e-11	276	20-282 (381)	509-787 (1267)
AF-A0A845UUW6-F1-model_v4	VWA domain-containing protein	Wenzhouxiangella limi	1	17.6	6.79e-08	275	30-193 (381)	404-567 (569)
AF-A0A356IH96-F1-model_v4	Uncharacterized protein	Acidobacteria bacterium	1	24.1	1.74e-07	275	33-199 (381)	409-578 (600)
AF-A0A2K9ALW1-F1-model_v4	Uncharacterized protein	Tenericutes bacterium MO-XQ	1	15.4	6.19e-12	275	13-332 (381)	229-524 (701)
AF-A0A7X8QKM9-F1-model_v4	VWA domain-containing protein	Clostridiaceae bacterium	1	15	3.41e-11	275	2-278 (381)	494-760 (912)
AF-A0A7C2NFH6-F1-model_v4	VWA domain-containing protein	Thermoanaerobaculum aquaticum	1	18.1	2.01e-11	274	12-285 (381)	241-515 (536)
AF-A0A8A2VG66-F1-model_v4	VWA domain-containing protein	Haloterrigena alkaliphila	1	16	6.52e-11	274	24-250 (381)	209-484 (930)
AF-A0A3D8GWJ6-F1-model_v4	VWFA domain-containing protein	Neobacillus piezotolerans	1	16.9	9.4e-13	274	28-300 (381)	394-781 (931)
AF-A0A6J6UKM0-F1-model_v4	Unannotated protein	freshwater metagenome	1	23.7	1.46e-07	273	31-199 (381)	21-190 (531)
AF-A0A7X6ZW58-F1-model_v4	VWA domain-containing protein	Clostridiaceae bacterium	1	21.6	5.69e-08	273	33-197 (381)	526-703 (712)
AF-A0A5C5X1X9-F1-model_v4	VWFA domain-containing protein	Thalassoglobus neptunius	1	13.2	7.05e-14	273	13-378 (381)	20-383 (827)
AF-A0A074W3L0-F1-model_v4	Uncharacterized protein	Aureobasidium melanogenum CBS 110374	1	15.1	2.14e-12	273	4-324 (381)	249-636 (881)
AF-A0A433D4G3-F1-model_v4	von Willebrand factor type A domain-containing protein	Jimgerdemannia flammicorona	1	16.4	4.12e-13	273	12-334 (381)	244-627 (941)
AF-A0A178DS03-F1-model_v4	VIT-domain-containing protein	Pyrenochaeta sp. DS3sAY3a	1	15	9.97e-13	273	5-324 (381)	263-670 (1143)
AF-A0A357B0R0-F1-model_v4	VWFA domain-containing protein	Clostridiales bacterium	1	14.8	5.19e-12	272	8-285 (381)	25-295 (363)
AF-A0A2T6DGM5-F1-model_v4	VWFA domain-containing protein	Verrucomicrobia bacterium LW23	1	18.8	3.55e-08	272	36-199 (381)	102-271 (417)
AF-A0A3D3J1R4-F1-model_v4	Uncharacterized protein	Lachnospiraceae bacterium	1	21.1	1.86e-08	272	35-199 (381)	2-185 (457)
AF-A0A1W1XY58-F1-model_v4	von Willebrand factor type A domain-containing protein	Desulfacinum hydrothermale DSM 13146	1	13	8.75e-11	272	6-248 (381)	132-371 (907)
AF-A0A7W1GB07-F1-model_v4	VWA domain-containing protein	Pyrinomonadaceae bacterium	1	18.8	5.46e-11	271	1-282 (381)	61-330 (330)
AF-A0A2M7G7L0-F1-model_v4	VWFA domain-containing protein	Anaerolineae bacterium CG17_big_fil_post_rev_8_21_14_2_50_57_27	1	13.9	9.34e-12	270	4-283 (381)	1-265 (368)
AF-A0A1G0PD38-F1-model_v4	VWFA domain-containing protein	Ignavibacteria bacterium GWB2_35_6b	1	14.3	6.96e-12	270	1-284 (381)	129-420 (518)
AF-A0A3M2ABK2-F1-model_v4	Uncharacterized protein	Deltaproteobacteria bacterium	1	17.3	2.43e-13	270	1-282 (381)	241-515 (711)
AF-A0A2P4QHX4-F1-model_v4	Uncharacterized protein	Rhizophagus irregularis DAOM 181602=DAOM 197198	1	13.3	8.86e-13	270	4-377 (381)	246-761 (767)
AF-A0A5S9F115-F1-model_v4	Marine proteobacterial sortase target protein	Candidatus Uabimicrobium amorphum	1	15.4	4.37e-13	269	1-324 (381)	315-654 (918)
AF-A0A4U0UT09-F1-model_v4	Uncharacterized protein	Friedmanniomyces endolithicus	1	12.7	1.05e-11	269	4-309 (381)	344-736 (1176)
AF-A0A848YXK4-F1-model_v4	VWA domain-containing protein	Desulfobacteraceae bacterium	1	12.8	7.38e-12	268	4-284 (381)	52-335 (335)
AF-A0A1V5B288-F1-model_v4	von Willebrand factor type A domain protein	Methanosaeta sp. PtaU1.Bin060	1	18.4	1.02e-07	267	36-199 (381)	37-211 (217)
AF-A0A543I1S9-F1-model_v4	Tight adherence protein B	Humibacillus xanthopallidus	1	11.3	7.47e-14	267	4-377 (381)	30-473 (653)
AF-A0A3C0AIM7-F1-model_v4	VWFA domain-containing protein	Planctomycetaceae bacterium	1	14.7	2.03e-13	267	7-354 (381)	29-397 (789)
AF-A0A6A6V195-F1-model_v4	Uncharacterized protein	Sporormia fimetaria CBS 119925	1	15.2	8.3e-12	267	4-324 (381)	265-681 (1220)
AF-A0A7R8GAC3-F1-model_v4	VWFA domain-containing protein	Luteitalea sp. TBR-22	1	16.2	3.62e-11	266	4-281 (381)	40-316 (316)
AF-A0A3C0XNA7-F1-model_v4	VWFA domain-containing protein	Chloroflexi bacterium	1	14.2	6.56e-12	266	1-333 (381)	20-316 (609)
AF-A0A0Q7QZP1-F1-model_v4	VWFA domain-containing protein	Nocardioides sp. Root140	1	17.3	3.89e-13	266	1-325 (381)	1-328 (613)
AF-A0A7S4FVM3-F1-model_v4	Hypothetical protein	Eutreptiella gymnastica	1	17.6	4.34e-12	266	4-305 (381)	245-582 (757)
AF-A0A169YER1-F1-model_v4	von Willebrand domain protein	Beauveria brongniartii RCEF 3172	1	16.3	8.36e-13	266	2-309 (381)	258-617 (863)
AF-A0A3D0H4K1-F1-model_v4	VWA domain-containing protein	Syntrophobacteraceae bacterium	1	18.4	1.02e-07	265	34-198 (381)	18-189 (196)
AF-A0A538FRY9-F1-model_v4	VWA domain-containing protein	Actinomycetia bacterium	1	14.9	7.38e-12	265	5-310 (381)	29-327 (622)
AF-I4Z5R4-F1-model_v4	VIT domain-containing protein	Leptothrix ochracea L12	1	13.9	7.83e-12	265	5-284 (381)	247-530 (791)
AF-A0A5C6DI60-F1-model_v4	von Willebrand factor type A domain protein	Novipirellula aureliae	1	19.2	1.88e-10	265	30-281 (381)	402-659 (938)
AF-A0A3M6TUF4-F1-model_v4	VWFA domain-containing protein	Pocillopora damicornis	1	15	1.38e-07	264	38-197 (381)	71-239 (272)
AF-A0A517S9J6-F1-model_v4	von Willebrand factor type A domain protein	Caulifigura coniformis	1	14.2	6.15e-11	264	7-276 (381)	193-453 (459)
AF-A0A3C0XIX8-F1-model_v4	VWFA domain-containing protein	Chloroflexi bacterium	1	16.3	1.26e-12	264	5-332 (381)	52-399 (664)
AF-A0A4U7B076-F1-model_v4	Uncharacterized protein	Elsinoe australis	1	13.4	1.33e-11	264	4-305 (381)	370-722 (1040)
AF-A0A7T9GHB5-F1-model_v4	VWA domain-containing protein	Acidobacteria bacterium	1	17.2	5.46e-11	263	3-282 (381)	72-341 (342)
AF-A0A2V9SSP6-F1-model_v4	VWA domain-containing protein	Acidobacteria bacterium	1	12.7	2.84e-10	263	1-282 (381)	122-395 (395)
AF-A0A1M5XAV0-F1-model_v4	Secreted protein containing Ig-like domain and vWFA domain	Desulfofustis glycolicus DSM 9705	1	12.6	9.97e-13	263	4-288 (381)	29-379 (582)
AF-A0A7G9RC35-F1-model_v4	Type II secretion system F family protein	Nocardioides mesophilus	1	15.1	3.66e-13	263	4-358 (381)	35-406 (655)
AF-A0A4S3K537-F1-model_v4	Ca-activated chloride channel family protein	Panacagrimonas perspica	1	15.3	1.18e-11	263	12-286 (381)	236-512 (779)
AF-A0A2N1PR31-F1-model_v4	Uncharacterized protein	Candidatus Wallbacteria bacterium HGW-Wallbacteria-1	1	13.8	1.69e-12	263	2-332 (381)	275-632 (839)
AF-A0A3D5M6W5-F1-model_v4	VWFA domain-containing protein	Planctomycetota bacterium	1	21.5	4e-08	263	29-217 (381)	573-764 (991)
AF-A0A671SR98-F1-model_v4	Poly [ADP-ribose] polymerase	Sinocyclocheilus anshuiensis	1	15.8	4.1e-12	263	6-300 (381)	662-960 (1064)
AF-A0A7W0G3H6-F1-model_v4	VWA domain-containing protein	Acidobacteria bacterium	1	16.6	3.03e-11	262	3-280 (381)	93-360 (364)
AF-A0A397THA9-F1-model_v4	von Willebrand factor type A domain-containing protein	Glomus cerebriforme	1	15.7	1.33e-11	262	12-312 (381)	233-575 (703)
AF-A0A3M6TX69-F1-model_v4	VWFA domain-containing protein	Pocillopora damicornis	1	14.2	1.38e-07	261	35-201 (381)	66-242 (269)
AF-A0A7R8AVU4-F1-model_v4	VWFA domain-containing protein	Luteitalea sp. TBR-22	1	14.6	3.84e-11	261	5-284 (381)	16-294 (294)
AF-A0A662HVV6-F1-model_v4	VWFA domain-containing protein	Thermoprotei archaeon	1	18.8	2.35e-08	261	21-199 (381)	68-256 (303)
AF-A0A2V7V6U3-F1-model_v4	VWFA domain-containing protein	Acidobacteria bacterium	1	13	4.86e-11	261	3-285 (381)	26-297 (305)
AF-A0A2V8RSQ0-F1-model_v4	VWA domain-containing protein	Acidobacteria bacterium	1	14.9	4.86e-11	261	3-284 (381)	70-341 (342)
AF-A0A2V8VQ84-F1-model_v4	VWA domain-containing protein	Acidobacteria bacterium	1	14.8	1.32e-10	261	3-282 (381)	74-345 (345)
AF-A0A3D5WFA3-F1-model_v4	VWFA domain-containing protein	Deltaproteobacteria bacterium	1	15.4	4.86e-11	261	7-275 (381)	245-503 (504)
AF-A0A496A4S6-F1-model_v4	Heat-shock protein Hsp70	Candidatus Poribacteria bacterium	1	17.6	1.48e-09	261	2-201 (381)	408-676 (693)
AF-A0A0L0HFH1-F1-model_v4	Uncharacterized protein	Spizellomyces punctatus DAOM BR117	1	16.4	3.64e-12	261	2-284 (381)	204-590 (1014)
AF-A0A7M7P272-F1-model_v4	Poly [ADP-ribose] polymerase	Strongylocentrotus purpuratus	1	12.3	7.83e-12	261	4-363 (381)	778-1230 (1255)
AF-A0A7R7Y7H6-F1-model_v4	VWFA domain-containing protein	Luteitalea sp. TBR-22	1	14.9	6.15e-11	260	3-279 (381)	38-290 (291)
AF-A0A7W0LBU0-F1-model_v4	VWA domain-containing protein	Acidobacteria bacterium	1	14.6	2.38e-10	260	1-276 (381)	51-303 (308)
AF-A0A806K107-F1-model_v4	Uncharacterized protein	uncultured bacterium contig00040	1	11.1	1.78e-11	260	9-285 (381)	21-296 (588)
AF-A0A7R8WKC5-F1-model_v4	Hypothetical protein	Cyprideis torosa	1	13.8	1.41e-11	260	4-332 (381)	285-635 (866)
AF-A0A6G1K4T4-F1-model_v4	Uncharacterized protein	Pleomassaria siparia CBS 279.74	1	15.7	3.84e-11	260	5-284 (381)	265-611 (924)
AF-A0A2V9K8E4-F1-model_v4	VWFA domain-containing protein	Acidobacteria bacterium	1	15	3.84e-11	259	3-282 (381)	66-341 (342)
AF-A0A226D2T1-F1-model_v4	von Willebrand factor A domain-containing protein 5A	Folsomia candida	1	16.6	1.26e-12	259	20-332 (381)	293-627 (703)
AF-A0A6A6VWB3-F1-model_v4	Uncharacterized protein	Pseudovirgaria hyperparasitica	1	14.3	2.71e-12	259	4-354 (381)	272-686 (1063)
AF-A0A078MAB8-F1-model_v4	von Willebrand factor type A domain protein	Metalysinibacillus saudimassiliensis	1	16.1	8.3e-12	258	28-276 (381)	392-755 (849)
AF-A0A139A6A9-F1-model_v4	Uncharacterized protein	Gonapodya prolifera JEL478	1	15.4	5.19e-12	258	4-354 (381)	243-619 (865)
AF-A0A0L0DHI2-F1-model_v4	von Willebrand domain-containing protein	Thecamonas trahens ATCC 50062	1	13.7	4.86e-11	258	2-282 (381)	232-584 (889)
AF-A0A2W0B4P1-F1-model_v4	VWA domain-containing protein	Acidobacteria bacterium	1	18.7	1.97e-08	257	5-198 (381)	105-319 (347)
AF-A0A2V9G1F3-F1-model_v4	VWA domain-containing protein	Acidobacteria bacterium	1	13	8.75e-11	257	3-282 (381)	93-364 (364)
AF-A0A1G3CS58-F1-model_v4	Uncharacterized protein	Polynucleobacter sp. GWA2_45_21	1	16.8	3.43e-12	257	1-302 (381)	190-521 (775)
AF-A0A842VEE0-F1-model_v4	VWA domain-containing protein	Candidatus Lokiarchaeota archaeon	1	11.3	7.88e-13	257	2-282 (381)	304-730 (1070)
AF-A0A1Y2LM81-F1-model_v4	Uncharacterized protein	Epicoccum nigrum	1	15.6	2.86e-11	257	5-305 (381)	259-626 (1106)
AF-A0A3M6TUV0-F1-model_v4	VWFA domain-containing protein	Pocillopora damicornis	1	16.6	1.55e-07	256	38-201 (381)	68-241 (266)
AF-A0A482R9A0-F1-model_v4	VWA domain-containing protein	archaeon	1	16.9	1.23e-08	256	28-199 (381)	59-258 (275)
AF-A0A0S8CPW9-F1-model_v4	VWFA domain-containing protein	Betaproteobacteria bacterium SG8_40	1	19.6	4.05e-10	256	31-290 (381)	148-409 (602)
AF-A0A4Z2F523-F1-model_v4	Poly [ADP-ribose] polymerase 4	Liparis tanakae	1	17.3	9.91e-12	256	2-283 (381)	226-498 (709)
AF-A0A2V9KGQ7-F1-model_v4	VWFA domain-containing protein	Acidobacteria bacterium	1	13.4	1.88e-10	256	4-285 (381)	41-304 (995)
AF-A0A7W1H507-F1-model_v4	Type II secretion system F family protein	Actinomycetia bacterium	1	15.9	2.56e-12	255	4-358 (381)	29-377 (626)
AF-A0A6A6RKH6-F1-model_v4	VIT-domain-containing protein	Massarina eburnea CBS 473.64	1	15.4	1.89e-11	255	5-305 (381)	266-642 (1106)
AF-A0A7V8YVJ9-F1-model_v4	VWA domain-containing protein	Actinomycetia bacterium	1	14.2	4.29e-10	254	1-285 (381)	19-281 (383)
AF-A0A150SFX0-F1-model_v4	VWFA domain-containing protein	Sorangium cellulosum	1	19.2	4.55e-10	254	36-291 (381)	278-531 (746)
AF-A0A2V8QB08-F1-model_v4	VWA domain-containing protein	Acidobacteria bacterium	1	14.5	4.86e-11	253	3-282 (381)	92-360 (362)
AF-A0A3N9U6L4-F1-model_v4	VWA domain-containing protein	Lysinibacillus composti	1	16.8	1.78e-11	253	28-284 (381)	398-772 (867)
AF-A0A3B9T0R9-F1-model_v4	VWA domain-containing protein	Ruminococcus sp.	1	17.9	5.36e-08	252	36-199 (381)	69-244 (250)
AF-A0A3N5YML3-F1-model_v4	VWA domain-containing protein	Acidobacteria bacterium	1	12	4.83e-10	252	3-276 (381)	86-337 (443)
AF-A0A7V0X0S8-F1-model_v4	FHA domain-containing protein	Spirochaetes bacterium	1	11.6	5.8e-11	252	6-290 (381)	34-324 (497)
AF-A0A6N9FE91-F1-model_v4	VWA domain-containing protein	Acidobacteria bacterium	1	19.8	2.63e-07	251	28-163 (381)	99-239 (325)
AF-A0A1G9GIS9-F1-model_v4	von Willebrand factor type A domain-containing protein	Natronorubrum texcoconense	1	13.7	2.66e-09	251	7-199 (381)	404-689 (764)
AF-A0A7C5IBH9-F1-model_v4	VWA domain-containing protein	Deltaproteobacteria bacterium	1	14.5	3.22e-11	251	28-275 (381)	386-728 (855)
AF-A0A3D4UJS9-F1-model_v4	VWFA domain-containing protein	Phycisphaerales bacterium	1	18.3	2.68e-10	251	28-290 (381)	428-700 (919)
AF-A6CIG8-F1-model_v4	VWFA domain-containing protein	Bacillus sp. SG-1	1	14.3	1.33e-11	251	30-285 (381)	403-775 (931)
AF-A0A7R9BJ16-F1-model_v4	Hypothetical protein	Notodromas monacha	1	14.9	2.4e-11	251	4-375 (381)	253-632 (1180)
AF-A0A538EY68-F1-model_v4	VWA domain-containing protein	Actinomycetia bacterium	1	12.4	2.71e-12	250	1-375 (381)	17-408 (624)
AF-A0A1C7DG63-F1-model_v4	VWFA domain-containing protein	Planococcus antarcticus DSM 14505	1	16.5	2.54e-11	250	28-278 (381)	393-757 (857)
AF-A0A2N2IPA5-F1-model_v4	Uncharacterized protein	Deltaproteobacteria bacterium HGW-Deltaproteobacteria-17	1	13.7	4.58e-11	250	4-332 (381)	539-860 (1273)
AF-A0A2V8E0T8-F1-model_v4	VWFA domain-containing protein	Acidobacteria bacterium	1	16.3	2.38e-10	249	4-285 (381)	152-407 (413)
AF-A0A7U9WT25-F1-model_v4	Uncharacterized protein	Lachnospiraceae bacterium	1	15.5	1.05e-11	249	7-284 (381)	30-299 (496)
AF-A0A2C9KUD1-F1-model_v4	Uncharacterized protein	Biomphalaria glabrata	1	17.7	6e-07	249	33-199 (381)	497-674 (714)
AF-A0A1H3XC74-F1-model_v4	Cytochrome c-type biogenesis protein CcmH/NrfG	Oribacterium sp. KHPX15	1	15.2	2.84e-10	249	2-285 (381)	399-686 (847)
AF-A0A2T6KNP5-F1-model_v4	von Willebrand factor type A domain-containing protein	Paenisporosarcina sp. OV554	1	14.3	1.68e-11	249	28-300 (381)	398-778 (866)
AF-A0A2W0B8R3-F1-model_v4	VWFA domain-containing protein	Acidobacteria bacterium	1	20.9	2.2e-07	248	37-196 (381)	67-241 (258)
AF-E9SYA8-F1-model_v4	Bacterial type II secretion system domain protein F	Prescottella equi ATCC 33707	1	12.8	4.34e-12	248	9-378 (381)	31-436 (623)
AF-A0A2V9T203-F1-model_v4	Uncharacterized protein	Acidobacteria bacterium	1	16.7	2.68e-10	247	4-276 (381)	423-680 (682)
AF-A0A2V5JY40-F1-model_v4	VWFA domain-containing protein	Paenibacillus flagellatus	1	15.1	9.28e-11	247	37-279 (381)	406-769 (893)
AF-A0A0M0J4Y7-F1-model_v4	Uncharacterized protein	Chrysochromulina tobinii	1	12.9	1.11e-11	247	1-324 (381)	203-569 (1007)
AF-A0A2D6BU89-F1-model_v4	VWFA domain-containing protein	Deltaproteobacteria bacterium	1	14	3.41e-11	246	8-285 (381)	48-328 (374)
AF-A0A532UAV8-F1-model_v4	VWFA domain-containing protein	bacterium (candidate division B38) B3_B38	1	14.6	6.52e-11	246	1-282 (381)	153-499 (499)
AF-A0A7X3VFW8-F1-model_v4	VWA domain-containing protein	Acidobacteriia bacterium	1	15.9	7.29e-10	246	28-289 (381)	371-639 (708)
AF-A0A6N8V9F4-F1-model_v4	VWA domain-containing protein	Holophagales bacterium	1	15.2	3.79e-09	246	5-248 (381)	589-839 (843)
AF-A0A2N3NJ13-F1-model_v4	Uncharacterized protein	Lomentospora prolificans	1	14.6	1.18e-10	246	4-324 (381)	255-665 (1013)
AF-A0A7W0MDP9-F1-model_v4	VWA domain-containing protein	Pyrinomonadaceae bacterium	1	16.2	8.2e-10	245	3-284 (381)	5-270 (270)
AF-A0A2E6ZTT7-F1-model_v4	VWFA domain-containing protein	Acidobacteria bacterium	1	13	8.7e-10	245	3-281 (381)	31-306 (306)
AF-A0A3F3K892-F1-model_v4	Uncharacterized protein	Faecalibacterium prausnitzii	1	12.8	1.11e-11	244	7-285 (381)	41-311 (574)
AF-A0A150UZT3-F1-model_v4	Uncharacterized protein	Acidomyces richmondensis BFW	1	14.4	1.5e-11	244	4-329 (381)	255-672 (811)
AF-A0A6B1GTU8-F1-model_v4	VWA domain-containing protein	Holophagales bacterium	1	17.2	8.2e-10	244	32-290 (381)	397-661 (863)
AF-A0A1H9Y3D9-F1-model_v4	von Willebrand factor type A domain-containing protein	Anaerobranca gottschalkii DSM 13577	1	13.8	3.41e-11	244	28-291 (381)	395-776 (870)
AF-A0A1V8U629-F1-model_v4	Uncharacterized protein	Rachicladosporium sp. CCFEE 5018	1	14.2	1.59e-11	244	4-281 (381)	258-597 (1106)
AF-A0A374BK09-F1-model_v4	VWA domain-containing protein	Ruminococcus sp. AM43-6	1	12.6	7.29e-10	244	2-199 (381)	439-722 (1264)
AF-A0A4V1SEC4-F1-model_v4	VWA domain-containing protein	Verrucomicrobiaceae bacterium	1	19.4	1.63e-06	243	30-197 (381)	323-493 (524)
AF-A0A7X8RK42-F1-model_v4	VWA domain-containing protein	Bacillus sp. RO1	1	15.3	3.41e-11	243	33-300 (381)	400-784 (917)
AF-A0A2M9PW73-F1-model_v4	VWFA domain-containing protein	Lysinibacillus xylanilyticus	1	15.8	3.03e-11	242	28-299 (381)	130-508 (597)
AF-A0A256XRW8-F1-model_v4	VWFA domain-containing protein	Thermofilum sp. ex4484_79	1	20.3	4.5e-08	241	21-199 (381)	84-277 (324)
AF-A0A6N9NU34-F1-model_v4	VWA domain-containing protein	Clostridiaceae bacterium	1	11.4	9.85e-11	241	8-285 (381)	28-298 (596)
AF-A0A103YB59-F1-model_v4	von Willebrand factor, type A	Cynara cardunculus var. scolymus	1	16.6	4.26e-09	241	30-286 (381)	256-489 (637)
AF-A0A0F4ZMI2-F1-model_v4	Uncharacterized protein	Thielaviopsis punctulata	1	12.8	1.68e-11	241	4-351 (381)	256-662 (865)
AF-A0A2I6QNN2-F1-model_v4	VWFA domain-containing protein	uncultured bacterium	1	13.9	7.34e-11	240	2-281 (381)	37-332 (332)
AF-A0A2V7V6V7-F1-model_v4	VWFA domain-containing protein	Acidobacteria bacterium	1	12.4	9.79e-10	240	3-282 (381)	97-351 (352)
AF-A0A831T7M4-F1-model_v4	VWA domain-containing protein	Blastocatellia bacterium	1	11.9	4.05e-10	240	2-285 (381)	54-339 (558)
AF-A0A0F6YJN4-F1-model_v4	VWFA domain-containing protein	Sandaracinus amylolyticus	1	17	1.17e-09	240	36-291 (381)	445-698 (899)
AF-A0A2V8LTG9-F1-model_v4	VWA domain-containing protein	Acidobacteria bacterium	1	12.2	2.65e-08	239	1-199 (381)	33-259 (282)
AF-A0A843S571-F1-model_v4	VWA domain-containing protein	Luteitalea sp.	1	11.7	1.57e-09	238	5-274 (381)	93-335 (342)
AF-A0A7R7EJN4-F1-model_v4	Uncharacterized protein	Lachnospiraceae bacterium TB5	1	12.6	7.34e-11	238	8-285 (381)	31-303 (533)
AF-A0A2V8VLL5-F1-model_v4	VWA domain-containing protein	Acidobacteria bacterium	1	14	1.57e-09	237	3-282 (381)	41-306 (307)
AF-A0A1F2RAG3-F1-model_v4	VWFA domain-containing protein	Acidobacteria bacterium RIFCSPLOWO2_02_FULL_64_15	1	12.3	4.83e-10	237	1-282 (381)	28-308 (309)
AF-A0A523ESH0-F1-model_v4	VWA domain-containing protein	Acidobacteria bacterium	1	13.5	6.11e-10	237	17-285 (381)	95-393 (395)
AF-A0A7K0A7X5-F1-model_v4	VWA domain-containing protein	Actinomycetia bacterium	1	15	2e-10	237	9-316 (381)	25-317 (520)
AF-A0A538FDK0-F1-model_v4	VWA domain-containing protein	Actinomycetia bacterium	1	10.2	1.33e-11	237	1-378 (381)	24-444 (578)
AF-A0A7C6E820-F1-model_v4	VWA domain-containing protein	Candidatus Solibacter sp.	1	16.5	4.26e-09	237	29-290 (381)	382-644 (843)
AF-A0A517MJM9-F1-model_v4	von Willebrand factor type A domain protein	Roseimaritima multifibrata	1	11.9	9.28e-11	237	30-285 (381)	413-792 (859)
AF-A0A849YXI3-F1-model_v4	Uncharacterized protein	Polyangiaceae bacterium	1	15.6	1.32e-10	237	20-314 (381)	396-702 (1098)
AF-A0A7W0GSR8-F1-model_v4	VWA domain-containing protein	Pyrinomonadaceae bacterium	1	17.9	4.47e-07	236	28-198 (381)	74-254 (275)
AF-A0A497E9F4-F1-model_v4	VWFA domain-containing protein	Acidobacteria bacterium	1	20.1	1.55e-07	236	28-201 (381)	37-203 (320)
AF-A0A2V8VNJ3-F1-model_v4	VWFA domain-containing protein	Acidobacteria bacterium	1	16.2	7.29e-10	235	17-284 (381)	142-443 (444)
AF-A0A3B9CSW6-F1-model_v4	Chloride channel protein	Planctomycetaceae bacterium	1	13	7.34e-11	235	28-291 (381)	400-792 (856)
AF-A0A0K1Q892-F1-model_v4	VWFA domain-containing protein	Labilithrix luteola	1	14.2	8.75e-11	235	30-278 (381)	526-912 (1010)
AF-A0A3M1XSR7-F1-model_v4	VWA domain-containing protein	Bacteroidetes bacterium	1	27.3	3.31e-06	234	34-201 (381)	475-646 (653)
AF-A0A662S3J1-F1-model_v4	VWFA domain-containing protein	Candidatus Korarchaeota archaeon	1	17.6	3.14e-07	233	23-200 (381)	92-291 (334)
AF-A0A2V8LPY3-F1-model_v4	VWFA domain-containing protein	Acidobacteria bacterium	1	14.4	2e-10	233	2-286 (381)	119-407 (411)
AF-A0A847LX07-F1-model_v4	VWA domain-containing protein	Exilispira sp.	1	20	7.68e-09	233	28-256 (381)	354-564 (565)
AF-A0A6N8XVR6-F1-model_v4	VWA domain-containing protein	Holophagales bacterium	1	15.2	1.56e-08	233	5-248 (381)	589-839 (843)
AF-M2AUM0-F1-model_v4	von Willebrand factor type A domain-containing protein	Rhodopirellula europaea 6C	1	15.3	1.56e-08	232	155-376 (381)	3-251 (275)
AF-A0A2V8VIU5-F1-model_v4	VWA domain-containing protein	Acidobacteria bacterium	1	15.4	6.07e-09	232	3-286 (381)	23-292 (296)
AF-A0A521T6X9-F1-model_v4	VWA domain-containing protein	Acidobacteria bacterium	1	12.5	4.8e-09	231	3-284 (381)	28-282 (282)
AF-A0A831T5Z6-F1-model_v4	VWA domain-containing protein	Blastocatellia bacterium	1	15.1	1.66e-09	231	2-282 (381)	45-304 (304)
AF-A0A2V8LIP5-F1-model_v4	VWFA domain-containing protein	Acidobacteria bacterium	1	16.2	2.1e-09	231	2-282 (381)	66-326 (326)
AF-A0A7C4DRH9-F1-model_v4	VWA domain-containing protein	Acidobacteria bacterium	1	14.1	9.23e-10	231	3-284 (381)	149-435 (435)
AF-A0A1J4KLW9-F1-model_v4	VWFA domain-containing protein	Tritrichomonas foetus	1	17.8	8.2e-10	231	31-290 (381)	278-563 (612)
AF-A0A850G733-F1-model_v4	VWA domain-containing protein	Pseudenhygromyxa sp. WMMC2535	1	17.5	1.33e-11	231	1-282 (381)	237-527 (715)
AF-A0A7X3QXA3-F1-model_v4	VWA domain-containing protein	Acidobacteriia bacterium	1	16.7	6.83e-09	231	28-291 (381)	372-632 (817)
AF-A0A1Q7RFL8-F1-model_v4	VWFA domain-containing protein	Acidobacteria bacterium 13_1_40CM_2_68_5	1	15.2	8.7e-10	230	17-285 (381)	73-375 (382)
AF-A0A7V9PFW0-F1-model_v4	VWA domain-containing protein	Acidimicrobiia bacterium	1	13.2	1.32e-10	230	1-283 (381)	39-302 (500)
AF-A0A7J7PWV3-F1-model_v4	VWFA domain-containing protein	Scenedesmus sp. NREL 46B-D3	1	15.5	3.79e-09	230	2-324 (381)	424-733 (854)
AF-A0A7Y5LNC0-F1-model_v4	VWA domain-containing protein	Myxococcales bacterium	1	14	1.77e-10	230	36-276 (381)	453-823 (903)
AF-A0A842VRB2-F1-model_v4	VWA domain-containing protein	Candidatus Lokiarchaeota archaeon	1	15.7	2.65e-08	229	6-199 (381)	209-447 (463)
AF-A0A7T8YMM2-F1-model_v4	VWA domain-containing protein	bacterium	1	24.1	2.61e-06	228	30-163 (381)	14-149 (155)
AF-A0A7W0LEH4-F1-model_v4	VWA domain-containing protein	Acidobacteria bacterium	1	16.3	1.03e-08	228	1-237 (381)	30-295 (298)
AF-A0A2V8GUE3-F1-model_v4	VWFA domain-containing protein	Acidobacteria bacterium	1	13.8	8.7e-10	228	1-282 (381)	121-380 (380)
AF-A0A2V9VR16-F1-model_v4	VWA domain-containing protein	Acidobacteria bacterium	1	16.2	1.76e-09	227	1-282 (381)	94-364 (364)
AF-A0A7C2DM06-F1-model_v4	VWA domain-containing protein	Actinomycetia bacterium	1	13.1	2.86e-11	227	1-337 (381)	28-350 (632)
AF-A0A1H6F6F3-F1-model_v4	Glycogen accumulation regulator GarA	Thiotrichales bacterium HS_08	1	14.3	3.2e-10	226	3-285 (381)	24-300 (480)
AF-A0A563EXC7-F1-model_v4	VWA domain-containing protein	Lentzea tibetensis	1	11.4	1.5e-11	226	1-313 (381)	20-309 (620)
AF-A0A6L7QEZ4-F1-model_v4	VWA domain-containing protein	Holophagales bacterium	1	13.3	4.52e-09	226	4-273 (381)	567-823 (828)
AF-A0A4P5WZV6-F1-model_v4	Uncharacterized protein	Planctomycetia bacterium	1	12	1.19e-12	225	4-276 (381)	312-590 (687)
AF-A0A7C2MAV4-F1-model_v4	VWA domain-containing protein	Acidobacteria bacterium	1	13.9	6.07e-09	224	2-282 (381)	26-290 (291)
AF-A0A496V514-F1-model_v4	Uncharacterized protein	Gammaproteobacteria bacterium	1	12.4	4.29e-10	224	4-285 (381)	22-308 (444)
AF-A0A3B9HYE5-F1-model_v4	Uncharacterized protein	Candidatus Riflebacteria bacterium	1	15.1	5.69e-08	224	8-204 (381)	233-462 (759)
AF-A0A520PP97-F1-model_v4	VWA domain-containing protein	Sandaracinaceae bacterium	1	11.6	1.76e-09	224	5-282 (381)	626-932 (1052)
AF-A0A239KR68-F1-model_v4	VWFA-related domain-containing protein	Granulicella rosea	1	14.6	3.79e-09	223	5-284 (381)	83-329 (331)
AF-A0A4Q7YXV6-F1-model_v4	VWFA-related protein	Edaphobacter modestus	1	15.1	1.39e-09	223	3-282 (381)	96-363 (364)
AF-A0A416CHS8-F1-model_v4	VWA domain-containing protein	Firmicutes bacterium AF36-19BH	1	12.6	2e-10	223	8-286 (381)	26-296 (548)
AF-A0A2V2SEJ2-F1-model_v4	VWFA domain-containing protein	Candidatus Rokubacteria bacterium	1	13.6	8.25e-11	223	4-313 (381)	26-336 (632)
AF-A0A7W0VEC3-F1-model_v4	VWA domain-containing protein	Deltaproteobacteria bacterium	1	11	1.76e-09	222	10-281 (381)	233-497 (503)
AF-A0A0M2RA21-F1-model_v4	Uncharacterized protein	Kiloniella litopenaei	1	15.4	1.73e-06	221	30-202 (381)	28-205 (236)
AF-A0A399WUQ8-F1-model_v4	VWFA domain-containing protein	Acidobacteria bacterium	1	16.2	2.23e-09	221	1-284 (381)	49-316 (316)
AF-R5ZZJ7-F1-model_v4	Putative von Willebrand factor type A domain protein	Proteobacteria bacterium CAG:139	1	16.2	2.53e-10	221	2-302 (381)	183-502 (742)
AF-A0A7C7YP91-F1-model_v4	VWA domain-containing protein	Planctomycetota bacterium	1	16.5	5.09e-09	221	29-272 (381)	438-681 (862)
AF-A0A255QWX4-F1-model_v4	Uncharacterized protein	Rhodopirellula sp. MGV	1	12.5	4.83e-10	221	30-291 (381)	439-835 (991)
AF-A0A665X4E2-F1-model_v4	Poly [ADP-ribose] polymerase	Echeneis naucrates	1	14.5	2.37e-09	221	6-305 (381)	590-872 (1137)
AF-A0A7V9PF49-F1-model_v4	Uncharacterized protein	Acidimicrobiia bacterium	1	13.2	3.6e-10	220	6-285 (381)	45-300 (410)
AF-A0A7Z9UA74-F1-model_v4	VWA domain-containing protein	Phycisphaerales bacterium	1	13.7	3.2e-10	220	39-274 (381)	338-675 (847)
AF-A0A316DAE7-F1-model_v4	Putative glutamine amidotransferase	Tumebacillus permanentifrigoris	1	13.5	1.1e-09	220	28-291 (381)	392-778 (920)
AF-A0A1Y3QDL6-F1-model_v4	VWFA domain-containing protein	Thermobacillus sp. ZCTH02-B1	1	13.3	1.17e-09	220	36-283 (381)	402-771 (1008)
AF-A0A353C7X5-F1-model_v4	VWFA domain-containing protein	Blastocatellia bacterium	1	17	2.49e-08	219	1-247 (381)	35-265 (265)
AF-A1S120-F1-model_v4	von Willebrand factor, type A	Thermofilum pendens Hrk 5	1	14.9	1.29e-06	219	23-199 (381)	67-258 (305)
AF-A0A5B9EHV8-F1-model_v4	VWA domain-containing protein	Terriglobus albidus	1	11.8	4.02e-09	218	1-282 (381)	60-330 (330)
AF-A0A2V8Q3R3-F1-model_v4	VWFA domain-containing protein	Acidobacteria bacterium	1	14.2	1.24e-09	217	1-285 (381)	50-342 (345)
AF-A0A3N5YMW9-F1-model_v4	VWA domain-containing protein	Acidobacteria bacterium	1	15.2	1.57e-09	217	4-280 (381)	78-357 (364)
AF-A0A7Y5CTD8-F1-model_v4	VWA domain-containing protein	candidate division KSB1 bacterium	1	15.1	7.78e-11	217	16-286 (381)	126-486 (578)
AF-A0A2D9T5M0-F1-model_v4	VIT domain-containing protein	Sandaracinus sp.	1	17.5	4.05e-10	217	1-248 (381)	306-546 (766)
AF-A0A381VRD0-F1-model_v4	VWFA domain-containing protein	marine metagenome	1	13.3	6.11e-10	217	32-300 (381)	401-790 (855)
AF-A0A7C5LIT6-F1-model_v4	VWA domain-containing protein	Deltaproteobacteria bacterium	1	13.1	4.55e-10	217	30-298 (381)	409-804 (858)
AF-A0A174ZB54-F1-model_v4	Mg-chelatase subunit ChlD	Lachnospira eligens	1	13.4	7.2e-08	217	4-199 (381)	488-771 (1278)
AF-A0A6B9YVG9-F1-model_v4	VWA domain-containing protein	Edaphobacter sp. 12200R-103	1	15.4	1.76e-09	216	1-287 (381)	82-359 (377)
AF-A0A3B9GHD5-F1-model_v4	VWFA domain-containing protein	Spirochaetaceae bacterium	1	15.5	1.58e-10	216	28-281 (381)	295-652 (702)
AF-R5P7C2-F1-model_v4	Uncharacterized protein containing a von Willebrand factor type A (VWA) domain	Clostridium sp. CAG:127	1	12.8	2.81e-08	216	4-199 (381)	407-686 (1019)
AF-A0A321LQQ3-F1-model_v4	VWFA domain-containing protein	Blastocatellia bacterium AA13	1	15.6	1.39e-09	214	2-282 (381)	44-340 (341)
AF-A0A2V9J5A5-F1-model_v4	VWFA domain-containing protein	Acidobacteria bacterium	1	10.8	1.87e-09	214	3-287 (381)	65-350 (353)
AF-A0A7C2BTF9-F1-model_v4	VWA domain-containing protein	Blastocatellia bacterium	1	13.4	4.26e-09	214	1-284 (381)	80-353 (353)
AF-A0A4V2L0F9-F1-model_v4	Uncharacterized protein	Bowmanella sp. JS7-9	1	15.7	1.75e-08	214	4-253 (381)	166-462 (669)
AF-A0A7Y6UDA9-F1-model_v4	VWA domain-containing protein	Kofleriaceae bacterium	1	12.4	8.2e-10	214	1-293 (381)	217-499 (719)
AF-A0A329MIX6-F1-model_v4	VWFA domain-containing protein	Paenibacillus contaminans	1	14.7	7.73e-10	213	38-278 (381)	407-789 (993)
AF-A0A2V8UQM5-F1-model_v4	Uncharacterized protein	Acidobacteria bacterium	1	12.1	1.04e-09	212	2-282 (381)	26-313 (313)
AF-A0A352FPJ1-F1-model_v4	VWFA domain-containing protein	Blastocatellia bacterium	1	15.6	5.4e-09	212	2-282 (381)	90-350 (350)
AF-A0A2V9MF26-F1-model_v4	VWFA domain-containing protein	Acidobacteria bacterium	1	14.6	1.17e-09	211	3-282 (381)	62-330 (330)
AF-A0A847F061-F1-model_v4	VWA domain-containing protein	Sandaracinaceae bacterium	1	12.9	3e-09	211	26-277 (381)	441-834 (911)
AF-A0A2V8H388-F1-model_v4	VWA domain-containing protein	Acidobacteria bacterium	1	14.8	7.2e-08	210	22-282 (381)	21-262 (263)
AF-A0A7X5C855-F1-model_v4	FHA domain-containing protein	Lachnospiraceae bacterium	1	12	1.67e-10	210	9-285 (381)	34-318 (535)
AF-A0A7W0HFC9-F1-model_v4	VWA domain-containing protein	Acidobacteria bacterium	1	13	2.37e-09	209	3-282 (381)	31-298 (299)
AF-A0A831T324-F1-model_v4	VWA domain-containing protein	Blastocatellia bacterium	1	12.9	2.37e-09	209	1-276 (381)	47-310 (314)
AF-A0A373SH24-F1-model_v4	VWA domain-containing protein	Ruminococcus sp. AF25-19	1	11.1	1.31e-09	209	2-235 (381)	439-799 (974)
AF-A0A6L8D460-F1-model_v4	VWA domain-containing protein	Gammaproteobacteria bacterium	1	18.3	4.99e-06	208	34-202 (381)	13-188 (216)
AF-A0A3M2DN57-F1-model_v4	VWA domain-containing protein	Deltaproteobacteria bacterium	1	14.8	2.66e-09	207	36-276 (381)	456-824 (904)
AF-A0A831X568-F1-model_v4	VWA domain-containing protein	Blastocatellia bacterium	1	15.6	8.15e-09	206	3-276 (381)	138-414 (418)
AF-R5EBR8-F1-model_v4	FHA domain-containing protein	Firmicutes bacterium CAG:110	1	15.4	4.26e-09	206	9-285 (381)	33-311 (528)
AF-A0A6L6BV79-F1-model_v4	VWFA domain-containing protein	Actinomycetia bacterium	1	10.5	5.76e-10	206	6-326 (381)	50-375 (660)
AF-A0A7Z8ST10-F1-model_v4	Isopeptide-forming domain-containing fimbrial protein	Enterococcus sp. N041.A-2	1	8.9	1.04e-10	206	5-281 (381)	42-415 (1116)
AF-A0A7T9GGC7-F1-model_v4	VWA domain-containing protein	Acidobacteria bacterium	1	15.2	4.8e-09	205	2-282 (381)	37-329 (329)
AF-A0A7T9GK36-F1-model_v4	VWA domain-containing protein	Acidobacteria bacterium	1	12.7	1.86e-08	205	3-281 (381)	77-350 (367)
AF-A0A256ITB3-F1-model_v4	VWFA domain-containing protein	Halorubrum halodurans	1	11.4	8.7e-10	205	4-285 (381)	116-457 (473)
AF-A0A2E7W3J4-F1-model_v4	VWFA domain-containing protein	Rhodospirillaceae bacterium	1	19.4	1.45e-06	204	28-198 (381)	14-193 (209)
AF-A0A3N5Z2Y4-F1-model_v4	VWA domain-containing protein	Acidobacteria bacterium	1	13.4	4.02e-09	204	2-281 (381)	320-610 (610)
AF-A9WIT9-F1-model_v4	von Willebrand factor type A	Chloroflexus aurantiacus J-10-fl	1	12.7	8.7e-10	204	29-278 (381)	404-782 (905)
AF-D1AQ56-F1-model_v4	von Willebrand factor type A	Sebaldella termitidis ATCC 33386	1	14.4	2.32e-06	203	35-197 (381)	34-207 (233)
AF-A0A2A4MR08-F1-model_v4	Uncharacterized protein	Gammaproteobacteria bacterium	1	16.4	2.32e-06	203	31-202 (381)	29-205 (238)
AF-E3T6R4-F1-model_v4	Putative von Willebrand factor type A domain protein	uncultured bacterium 259	1	13.4	1.3e-08	203	2-282 (381)	37-297 (297)
AF-A0A136P9W0-F1-model_v4	von Willebrand factor type A domain protein	Chlorobi bacterium OLB7	1	14.2	3.35e-08	203	1-248 (381)	78-344 (362)
AF-A0A7W0WW94-F1-model_v4	VWA domain-containing protein	Deltaproteobacteria bacterium	1	19	4.19e-06	203	36-198 (381)	344-524 (526)
AF-E3T6R2-F1-model_v4	von Willebrand factor type A domain protein	uncultured bacterium 259	1	14.3	7.24e-09	202	3-282 (381)	31-311 (311)
AF-A0A1S5Y202-F1-model_v4	VWFA domain-containing protein	uncultured bacterium	1	12.7	1.24e-09	202	3-281 (381)	64-376 (376)
AF-A0A1F7PGQ6-F1-model_v4	VWFA domain-containing protein	Candidatus Rokubacteria bacterium RIFCSPLOWO2_12_FULL_71_22	1	15.8	1.86e-08	202	30-274 (381)	396-728 (846)
AF-A0A1V5PAM6-F1-model_v4	von Willebrand factor type A domain protein	bacterium ADurb.Bin363	1	12.5	1.66e-09	202	2-282 (381)	595-917 (917)
AF-A0A7C3D9J4-F1-model_v4	VWA domain-containing protein	Bryobacterales bacterium	1	17	6.79e-08	202	28-293 (381)	471-746 (934)
AF-A0A287VC59-F1-model_v4	VWFA domain-containing protein	Hordeum vulgare subsp. vulgare	1	9.6	6.11e-10	201	2-381 (381)	22-323 (403)
AF-A0A3C0WXL8-F1-model_v4	VWFA domain-containing protein	Spirochaetaceae bacterium	1	9.3	2.84e-10	201	4-312 (381)	34-349 (445)
AF-A0A2N2IFZ1-F1-model_v4	VWFA domain-containing protein	Deltaproteobacteria bacterium HGW-Deltaproteobacteria-17	1	13.4	3.37e-09	201	31-312 (381)	179-611 (620)
AF-E9S8C8-F1-model_v4	von Willebrand factor type A domain protein	Ruminococcus albus 8	1	13.4	9.11e-08	201	3-197 (381)	116-410 (812)
AF-A0A2N2JHK0-F1-model_v4	VWFA domain-containing protein	Deltaproteobacteria bacterium HGW-Deltaproteobacteria-14	1	14.1	8.2e-10	200	30-277 (381)	482-874 (959)
AF-A0A3N5Z210-F1-model_v4	VWA domain-containing protein	Acidobacteria bacterium	1	11	2.81e-08	199	19-285 (381)	354-647 (648)
AF-A0A7X4KXG2-F1-model_v4	VWFA domain-containing protein	Acidobacteria bacterium	1	13	6.4e-08	198	1-245 (381)	5-276 (293)
AF-A0A7C4JNK6-F1-model_v4	VWA domain-containing protein	Staphylothermus marinus	1	16.6	2.46e-06	198	21-200 (381)	74-277 (325)
AF-A0A812PNB9-F1-model_v4	Hypothetical protein	Symbiodinium necroappetens	1	15.1	9.6e-07	198	1-199 (381)	97-332 (359)
AF-A0A1G4QXI0-F1-model_v4	von Willebrand factor type A domain-containing protein	Lachnospiraceae bacterium C10	1	13.3	2.53e-10	198	2-373 (381)	33-410 (413)
AF-A0A812XB30-F1-model_v4	FH2 protein	Symbiodinium microadriaticum	1	19.2	4.19e-06	198	33-202 (381)	3-178 (854)
AF-A0A665X4P0-F1-model_v4	Poly [ADP-ribose] polymerase	Echeneis naucrates	1	14	1.03e-08	198	6-289 (381)	551-824 (943)
AF-A0A1C5NU26-F1-model_v4	Uncharacterized conserved protein, contains FHA domain	uncultured Blautia sp.	1	12.8	1.58e-10	197	7-289 (381)	33-421 (577)
AF-A0A2W5TVZ5-F1-model_v4	VIT domain-containing protein	Archangium gephyra	1	15.7	7.78e-11	197	10-332 (381)	198-493 (962)
AF-A0A0H5BFC4-F1-model_v4	Uncharacterized protein	Blastochloris viridis	1	18.2	9e-06	196	31-198 (381)	36-212 (245)
AF-A0A2V8DPA5-F1-model_v4	VWFA domain-containing protein	Acidobacteria bacterium	1	13.1	1.3e-08	196	3-285 (381)	55-327 (369)
AF-A0A7Z9PW95-F1-model_v4	VWA domain-containing protein	Phycisphaerales bacterium	1	12.5	1.38e-08	196	28-280 (381)	396-791 (954)
AF-A0A4D6HJI1-F1-model_v4	VWA domain-containing protein	Natronorubrum bangense	1	12	1.16e-08	196	24-275 (381)	163-493 (1119)
AF-A0A849DUA1-F1-model_v4	VWA domain-containing protein	Dactylosporangium sp.	1	17.1	2.31e-05	194	27-147 (381)	73-202 (216)
AF-A0A3B9WWF4-F1-model_v4	Uncharacterized protein	Lachnospiraceae bacterium	1	17.9	4.71e-06	194	37-199 (381)	2-178 (336)
AF-A0A6A6KHV4-F1-model_v4	VWFA domain-containing protein	Hevea brasiliensis	1	14.6	1.04e-10	194	2-334 (381)	216-514 (606)
AF-A0A7Z9V3F1-F1-model_v4	VWA domain-containing protein	Candidatus Poribacteria bacterium	1	14.2	3e-09	194	29-300 (381)	405-788 (892)
AF-A0A7T9GIB8-F1-model_v4	VWA domain-containing protein	Acidobacteria bacterium	1	11.5	1.23e-08	193	3-285 (381)	44-394 (403)
AF-A0A3A2ZEI3-F1-model_v4	von Willebrand	Aspergillus sclerotialis	1	12	5.12e-10	193	6-334 (381)	213-593 (884)
AF-A0A7X5J7F6-F1-model_v4	VWA domain-containing protein	Pannonibacter sp. XCT-53	1	18.6	1.07e-05	192	33-198 (381)	13-184 (218)
AF-A0A3E0N5H6-F1-model_v4	VWA domain-containing protein	Planctomycetota bacterium	1	12	9.72e-09	192	38-291 (381)	413-800 (865)
AF-A0A7X4E7M9-F1-model_v4	Uncharacterized protein	Acidobacteria bacterium	1	11.2	4.5e-08	191	2-260 (381)	37-305 (312)
AF-A0A1G2CFY7-F1-model_v4	VWFA domain-containing protein	Candidatus Liptonbacteria bacterium RIFCSPLOWO2_01_FULL_52_25	1	13.2	8.1e-08	190	3-285 (381)	46-317 (318)
AF-A0A1H6FF01-F1-model_v4	Transcriptional regulatory protein EmbR	Thiotrichales bacterium HS_08	1	12.7	1.39e-09	190	1-321 (381)	4-350 (457)
AF-A0A1F9EU66-F1-model_v4	VWFA domain-containing protein	Deltaproteobacteria bacterium RBG_16_71_12	1	12.5	1.87e-09	190	2-287 (381)	220-532 (722)
AF-A0A433PA58-F1-model_v4	VWFA domain-containing protein	Endogone sp. FLAS-F59071	1	13.8	1.47e-08	190	4-284 (381)	501-780 (783)
AF-A0A2V9IWA9-F1-model_v4	VWFA domain-containing protein	Acidobacteria bacterium	1	11.2	6.83e-09	188	3-285 (381)	58-383 (389)
AF-E9DRC2-F1-model_v4	von Willebrand domain containing protein	Metarhizium acridum CQMa 102	1	13.3	1.55e-07	187	4-284 (381)	213-502 (723)
AF-A0A1F2QER8-F1-model_v4	VWFA domain-containing protein	Acidobacteria bacterium RBG_13_68_16	1	11.4	1.97e-08	186	1-276 (381)	17-387 (392)
AF-A0A7C5NPR8-F1-model_v4	VWA domain-containing protein	Phycisphaerae bacterium	1	17.4	1.46e-07	185	35-290 (381)	331-587 (663)
AF-A0A6I7P474-F1-model_v4	VWA domain-containing protein	Geminicoccaceae bacterium	1	16.5	1.36e-05	184	28-198 (381)	26-200 (230)
AF-H1LUB6-F1-model_v4	von Willebrand factor type A domain protein	Lachnospiraceae bacterium oral taxon 082 str. F0431	1	13.3	3.18e-09	184	10-347 (381)	35-369 (373)
AF-A0A1J4KDM3-F1-model_v4	VIT domain-containing protein	Tritrichomonas foetus	1	11.5	1.03e-08	183	13-308 (381)	215-492 (783)
AF-A0A2V8PUR0-F1-model_v4	VWFA domain-containing protein	Acidobacteria bacterium	1	9.2	3.77e-08	182	1-282 (381)	52-350 (350)
AF-A0A2V9VNH2-F1-model_v4	VWFA domain-containing protein	Acidobacteria bacterium	1	12.6	1.09e-07	181	3-276 (381)	55-290 (296)
AF-A0A2W4QAQ4-F1-model_v4	Uncharacterized protein	Candidatus Methylumidiphilus alinenensis	1	14.2	1.56e-08	181	1-286 (381)	22-319 (500)
AF-A0A524K7K6-F1-model_v4	VWA domain-containing protein	Spirochaetales bacterium	1	12.3	8.1e-08	180	36-276 (381)	417-790 (892)
AF-A0A174CVH5-F1-model_v4	Uncharacterized conserved protein, contains FHA domain	Anaerobutyricum hallii	1	11.4	3.81e-10	178	6-290 (381)	31-428 (587)
AF-A0A7C5GMB0-F1-model_v4	OmpA-like domain-containing protein	bacterium	1	15.6	2.23e-09	177	14-293 (381)	46-322 (445)
AF-A0A356IHV2-F1-model_v4	VWFA domain-containing protein	Acidobacteria bacterium	1	15.7	1.16e-08	177	38-274 (381)	91-305 (447)
AF-A0A0H4I020-F1-model_v4	Uncharacterized protein	Marinobacter psychrophilus	1	15.2	3.49e-05	176	36-202 (381)	35-207 (235)
AF-A0A3A9JA84-F1-model_v4	VWA domain-containing protein	Roseomonas wenyumeiae	1	17.3	1.53e-05	175	28-199 (381)	23-198 (220)
AF-A0A382JR40-F1-model_v4	Uncharacterized protein	marine metagenome	1	15.2	5.58e-05	175	30-202 (381)	39-216 (222)
AF-A0A2S5MVK4-F1-model_v4	Uncharacterized protein	Hyphomicrobium sp.	1	17.2	1.36e-05	175	35-197 (381)	58-222 (262)
AF-A0A352FT80-F1-model_v4	VWFA domain-containing protein	Blastocatellia bacterium	1	13	2.35e-08	175	5-286 (381)	100-452 (453)
AF-A0A1J4JY62-F1-model_v4	VIT domain-containing protein	Tritrichomonas foetus	1	9.1	5.36e-08	175	7-301 (381)	221-498 (770)
AF-A0A7X8YUP5-F1-model_v4	VWA domain-containing protein	Acidobacteria bacterium	1	9	2.34e-07	174	3-282 (381)	47-321 (321)
AF-A0A2V8SXF2-F1-model_v4	VWFA domain-containing protein	Acidobacteria bacterium	1	14.4	4.24e-08	172	1-282 (381)	117-414 (414)
AF-A0A852UFM1-F1-model_v4	Uncharacterized protein	Sporosarcina sp. JAI121	1	13	9.72e-09	172	2-282 (381)	476-832 (833)
AF-A0A011UDQ3-F1-model_v4	VWFA domain-containing protein	Ruminococcus albus SY3	1	21.3	4.41e-05	172	36-197 (381)	563-731 (888)
AF-A0A177EII5-F1-model_v4	Transcription initiation factor TFIIH subunit 2	Nematocida displodere	1	12.4	2.77e-06	169	28-270 (381)	33-261 (345)
AF-A0A7W1QRE7-F1-model_v4	VWA domain-containing protein	Acidobacteria bacterium	1	11	2.34e-07	168	1-282 (381)	56-354 (354)
AF-A0A2D8YRH0-F1-model_v4	Uncharacterized protein	Hyphomicrobiales bacterium	1	13.1	2.05e-05	167	33-198 (381)	69-240 (269)
AF-A0A3B9WRQ6-F1-model_v4	Uncharacterized protein	Lachnospiraceae bacterium	1	12.8	3.55e-08	165	5-294 (381)	4-283 (496)
AF-A0A7R8WGR4-F1-model_v4	Hypothetical protein	Cyprideis torosa	1	14.9	3.33e-07	165	4-252 (381)	256-507 (643)
AF-A0A2E6JDF8-F1-model_v4	Uncharacterized protein	Gammaproteobacteria bacterium	1	12.9	7.07e-05	164	37-198 (381)	32-199 (232)
AF-A0A7C7EUU2-F1-model_v4	Starch-binding protein	Clostridiales bacterium	1	13.1	2.07e-06	163	7-197 (381)	478-755 (851)
AF-A0A357EWW2-F1-model_v4	VWFA domain-containing protein	Blastocatellia bacterium	1	14	0.000889	162	36-150 (381)	131-249 (293)
AF-A0A7V9AWB1-F1-model_v4	BatA domain-containing protein	Acidobacteria bacterium	1	14.7	4e-08	162	33-283 (381)	83-305 (611)
AF-A0A7Y5UAK1-F1-model_v4	VWA domain-containing protein	Polyangiaceae bacterium	1	13.2	2.2e-07	162	34-275 (381)	415-793 (867)
AF-A0A858Q9G9-F1-model_v4	VWA domain-containing protein	Methylococcus geothermalis	1	17	2.92e-05	160	33-201 (381)	31-208 (235)
AF-A0A2N5ZE37-F1-model_v4	VWFA domain-containing protein	Candidatus Muirbacterium halophilum	1	15.2	7.24e-09	160	3-292 (381)	26-349 (587)
AF-A0A2V8NPK7-F1-model_v4	VWFA domain-containing protein	Acidobacteria bacterium	1	13.5	4.68e-05	159	38-187 (381)	108-310 (346)
AF-A0A4R4PJ52-F1-model_v4	VWA domain-containing protein	Micromonospora sp. 15K316	1	16.2	4.41e-05	157	36-200 (381)	41-198 (206)
AF-A0A267EL68-F1-model_v4	Uncharacterized protein	Macrostomum lignano	1	16.7	0.000135	157	16-200 (381)	30-220 (625)
AF-A0A370AWR0-F1-model_v4	VWFA domain-containing protein	Oceanispirochaeta sp. M1	1	9.7	5.33e-07	156	5-282 (381)	409-686 (687)
AF-E6UJK7-F1-model_v4	von Willebrand factor type A	Ruminococcus albus 7 = DSM 20455	1	13.2	1.14e-05	155	4-199 (381)	447-733 (1061)
AF-A0A2V8RAS4-F1-model_v4	VWFA domain-containing protein	Acidobacteria bacterium	1	9	1.15e-06	153	1-280 (381)	98-398 (399)
AF-A0A321LB22-F1-model_v4	VWFA domain-containing protein	Blastocatellia bacterium AA13	1	14	5.03e-07	148	2-287 (381)	257-584 (586)
AF-A0A2E6NGY9-F1-model_v4	VWFA domain-containing protein	Acidobacteria bacterium	1	14.6	7.2e-08	147	27-278 (381)	79-307 (625)
AF-A0A2V8TAN7-F1-model_v4	VWFA domain-containing protein	Acidobacteria bacterium	1	13.2	9.6e-07	146	2-284 (381)	281-605 (610)
AF-A0A3N6B9D6-F1-model_v4	VWA domain-containing protein	Acidobacteria bacterium	1	14.7	3.55e-08	141	5-380 (381)	49-431 (468)
AF-A0A848W7G8-F1-model_v4	Uncharacterized protein	Alphaproteobacteria bacterium	1	12.2	3.92e-05	137	187-381 (381)	7-253 (256)
AF-A0A7T9CGI6-F1-model_v4	VWA domain-containing protein	Holophagales bacterium	1	11.1	1.01e-05	135	1-272 (381)	570-843 (846)
AF-A0A2T8KH69-F1-model_v4	Uncharacterized protein	Panicum hallii	1	14	1.01e-05	134	114-290 (381)	3-186 (470)
AF-A0A2D6KVP5-F1-model_v4	Uncharacterized protein	Candidatus Woesearchaeota archaeon	1	16.3	1.22e-06	134	27-281 (381)	80-308 (596)
AF-A0A7T9CGJ2-F1-model_v4	VWA domain-containing protein	Holophagales bacterium	1	9.7	6.32e-06	134	1-272 (381)	526-808 (810)
AF-A0A7C5XX70-F1-model_v4	VWA domain-containing protein	Candidatus Altiarchaeales archaeon	1	12.4	9.66e-08	132	20-290 (381)	86-344 (636)
AF-A0A3M6TUM3-F1-model_v4	VWFA domain-containing protein	Pocillopora damicornis	1	13.7	0.0126	129	38-147 (381)	63-178 (259)
AF-A0A078M7Y9-F1-model_v4	VWFA domain-containing protein	Metalysinibacillus saudimassiliensis	1	14.5	1.84e-06	127	30-272 (381)	77-298 (571)
AF-A0A1I8J8P5-F1-model_v4	Uncharacterized protein	Macrostomum lignano	1	14.4	8e-06	127	5-285 (381)	509-754 (980)
AF-A0A285TVA9-F1-model_v4	von Willebrand factor type A domain-containing protein	Ureibacillus xyleni	1	14.4	4.16e-05	111	29-272 (381)	79-299 (579)
AF-A0A554NFG4-F1-model_v4	Uncharacterized protein	Haloglomus irregulare	1	14.4	4.44e-06	111	27-285 (381)	83-304 (600)
AF-A0A256XX73-F1-model_v4	BatA domain-containing protein	Candidatus Woesearchaeota archaeon ex4484_78	1	13.4	1.44e-05	108	19-275 (381)	80-301 (600)
AF-A0A0S2EN48-F1-model_v4	Uncharacterized protein	Aureimonas sp. AU20	1	13.2	0.000662	90	25-273 (381)	80-310 (954)
AF-A0A2E3FR02-F1-model_v4	Uncharacterized protein	Euryarchaeota archaeon	0.9	12.5	0.105	67	207-286 (381)	189-268 (316)
AF-A0A7J4JZT4-F1-model_v4	Uncharacterized protein	Candidatus Micrarchaeota archaeon	0.89	18	0.0581	66	200-280 (381)	57-136 (503)
AF-L7VN20-F1-model_v4	S-layer domain-containing protein	Thermoclostridium stercorarium subsp. stercorarium DSM 8532	0.87	19.5	0.2	65	202-285 (381)	672-753 (816)
AF-A0A7H8JSF5-F1-model_v4	Carbohydrate-binding protein	Streptomyces sp. NA04227	0.85	11.7	0.225	64	204-281 (381)	1063-1145 (1276)
AF-A0A353KC90-F1-model_v4	NPCBM domain-containing protein	Streptomyces sp.	0.44	11.5	1.4	49	207-281 (381)	138-212 (364)
AF-A0A1K1S3Q8-F1-model_v4	Ig-like domain (Group 2)	Amycolatopsis australiensis	0.44	5.5	0.731	49	207-276 (381)	246-317 (517)
AF-A0A1D2RFH6-F1-model_v4	Uncharacterized protein	Candidatus Altiarchaeales archaeon IMC4	0.44	14.9	0.925	49	204-283 (381)	179-260 (532)

## Sheet: PDB100 Data base
PDB code	Description	Organism	Prob.	Sequence Id.	E-value	Score	Query Position	Target Position
5a8j_A	Crystal structure of the ArnB paralog VWA2 from Sulfolobus acidocaldarius	Sulfolobus acidocaldarius	1	30.8	2.44e-33	1123	1-379 (381)	1-359 (365)
4fx5_A	von Willebrand factor type A from Catenulispora acidiphila	Catenulispora acidiphila DSM 44928	1	14.8	4.91e-22	598	2-347 (381)	10-392 (426)
6fpy_A	Inter-alpha-inhibitor heavy chain 1, wild type	Homo sapiens	1	15.3	2.62e-16	415	7-332 (381)	224-553 (600)
6fpy_B	Inter-alpha-inhibitor heavy chain 1, wild type	Homo sapiens	1	15.6	8.03e-16	398	22-332 (381)	232-553 (599)
6fpz_B	Inter-alpha-inhibitor heavy chain 1, D298A	Homo sapiens	1	15	6.34e-16	397	7-332 (381)	224-553 (598)
1pd1_A	Crystal structure of the COPII coat subunit, Sec24, complexed with a peptide containing the DxE cargo sorting signal of yeast Sys1 protein	Saccharomyces cerevisiae	1	12.4	2.27e-12	280	33-378 (381)	162-575 (735)
1pd0_A	Crystal structure of the COPII coat subunit, Sec24, complexed with a peptide from the SNARE protein Sed5 (yeast syntaxin-5)	Saccharomyces cerevisiae	1	13.1	2.88e-12	276	33-378 (381)	162-574 (734)
1fe8_C	CRYSTAL STRUCTURE OF THE VON WILLEBRAND FACTOR A3 DOMAIN IN COMPLEX WITH A FAB FRAGMENT OF IGG RU5 THAT INHIBITS COLLAGEN BINDING	Homo sapiens	1	18.1	6.07e-09	269	33-200 (381)	3-182 (191)
3eh1_A	Crystal structure of the human COPII-coat protein Sec24b	Homo sapiens	1	12.2	2.41e-12	269	17-378 (381)	134-586 (737)
3eh2_B	Crystal structure of the human COPII-coat protein Sec24c	Homo sapiens	1	11.7	1.19e-12	269	33-376 (381)	156-587 (739)
3egd_A	Crystal structure of the mammalian COPII-coat protein Sec23a/24a complexed with the SNARE protein Sec22 and bound to the transport signal sequence of vesicular stomatitis virus glycoprotein	Homo sapiens	1	10.8	7.78e-11	268	28-380 (381)	118-579 (711)
4cnb_A	Structure of proximal thread matrix protein 1 (PTMP1) from the mussel byssus - Crystal form 2	Mytilus galloprovincialis	1	21.2	1.03e-08	265	32-202 (381)	2-189 (387)
2nut_B	Crystal Structure of the human Sec23a/24a heterodimer, complexed with the SNARE protein Sec22b	Homo sapiens	1	13.4	5.83e-12	264	33-325 (381)	143-508 (729)
5vni_B	Crystal structure of Sec23a/Sec24a/Sec22 complexed with a C-terminal FA sorting motif	Homo sapiens	1	14.4	1.18e-11	263	33-325 (381)	141-506 (727)
4igi_A	Crystal structure of the Collagen VI alpha3 N5 domain	Mus musculus	1	12.9	2.65e-08	261	38-197 (381)	2-172 (197)
4bzi_E	The structure of the COPII coat assembled on membranes	Saccharomyces cerevisiae	1	12.3	1.11e-11	260	33-379 (381)	167-604 (735)
5vng_A	Crystal structure of Sec23a/Sec24a/Sec22 complexed with a C-terminal II sorting motif	Homo sapiens	1	10	6.15e-11	259	28-378 (381)	118-585 (696)
3ppw_A	Crystal structure of the D1596A mutant of an engineered VWF A2 domain (N1493C and C1670S)	Homo sapiens	1	16.2	4.5e-08	256	36-199 (381)	3-171 (184)
3ppy_A	Crystal structure of the D1596A/N1602A double mutant of an engineered VWF A2 domain (N1493C and C1670S)	Homo sapiens	1	16	4.24e-08	254	34-199 (381)	4-174 (187)
4cn8_A	Structure of proximal thread matrix protein 1 (PTMP1) from the mussel byssus	Mytilus galloprovincialis	1	16.9	5.69e-08	252	24-199 (381)	194-377 (393)
3eh2_A	Crystal structure of the human COPII-coat protein Sec24c	Homo sapiens	1	12.4	7.83e-12	251	33-376 (381)	169-608 (758)
4cnb_B	Structure of proximal thread matrix protein 1 (PTMP1) from the mussel byssus - Crystal form 2	Mytilus galloprovincialis	1	21	3.35e-08	249	32-202 (381)	2-191 (391)
5vnj_B	Crystal structure of Sec23a/Sec24a/Sec22 complexed with a C-terminal FF sorting motif (ERGIC-53)	Homo sapiens	1	13.9	4.58e-11	247	33-325 (381)	145-510 (731)
1pcx_A	Crystal structure of the COPII coat subunit, Sec24, complexed with a peptide from the SNARE protein Bet1	Saccharomyces cerevisiae	1	13.1	3.22e-11	246	33-327 (381)	162-508 (745)
3ppx_A	Crystal structure of the N1602A mutant of an engineered VWF A2 domain (N1493C and C1670S)	Homo sapiens	1	16.2	8.59e-08	245	36-199 (381)	3-171 (184)
5vnl_A	Crystal structure of Sec23a/Sec24a/Sec22 complexed with 4-phenylbutyric acid (1mM soaking)	Homo sapiens	1	10.1	2.53e-10	245	24-329 (381)	114-524 (699)
4cn9_B	structure of proximal thread matrix protein 1 (PTMP1) from the mussel byssus with zinc occupied MIDAS motif	Mytilus galloprovincialis	1	17.4	9.66e-08	244	24-199 (381)	197-380 (396)
6bxj_A	Structure of a single-chain beta3 integrin	Homo sapiens	1	12.5	2.54e-11	244	8-284 (381)	82-371 (619)
8bsh_C	COPII inner coat	Saccharomyces cerevisiae	1	12.5	5.15e-11	243	33-380 (381)	167-610 (794)
3gxb_B	Crystal structure of VWF A2 domain	Homo sapiens	1	14.2	1.22e-07	239	38-199 (381)	3-169 (178)
3eg9_A	Crystal structure of the mammalian COPII-coat protein Sec23/24 bound to the transport signal sequence of membrin	Homo sapiens	1	11.1	8.7e-10	239	28-380 (381)	118-592 (726)
4f1k_B	Crystal structure of the MG2+ free VWA domain of plasmodium falciparum trap protein	Plasmodium falciparum	1	18.8	3.55e-08	236	34-198 (381)	3-188 (200)
4bzi_A	The structure of the COPII coat assembled on membranes	Saccharomyces cerevisiae	1	11.3	6.92e-11	235	24-378 (381)	108-590 (733)
1m2v_A	Crystal Structure of the yeast Sec23/24 heterodimer	Saccharomyces cerevisiae	1	13.1	2.86e-11	234	28-325 (381)	114-514 (705)
4ihk_A	Crystal structure of the Collagen VI alpha3 N5 domain R1061Q	Mus musculus	1	13	2.79e-07	232	35-197 (381)	1-174 (193)
7n1o_A	The von Willebrand factor A domain of human capillary morphogenesis gene II, flexibly fused to the 1TEL crystallization chaperone	Homo sapiens	1	21.6	1.15e-07	231	36-198 (381)	81-248 (257)
1ijb_A	The von Willebrand Factor mutant (I546V) A1 domain	Homo sapiens	1	15.3	2.48e-07	230	30-199 (381)	6-190 (202)
5vnj_A	Crystal structure of Sec23a/Sec24a/Sec22 complexed with a C-terminal FF sorting motif (ERGIC-53)	Homo sapiens	1	11	7.73e-10	230	17-329 (381)	113-523 (697)
5kyn_B	Structure of Sec23 and TANGO1 complex	Homo sapiens	1	11.6	4.05e-10	229	24-331 (381)	116-525 (719)
3zqk_B	Von Willebrand Factor A2 domain with calcium	Homo sapiens	1	15.3	5.33e-07	226	38-199 (381)	4-170 (178)
3efo_A	Crystal Structure of the mammalian COPII-coat protein Sec23/24 bound to the transport signal sequence of syntaxin 5	Homo sapiens	1	10.4	3.57e-09	226	28-380 (381)	118-582 (716)
5bv8_A	G1324S mutation in von Willebrand Factor A1 domain	Homo sapiens	1	15.1	2.96e-07	225	30-199 (381)	8-192 (209)
8ft8_A	The von Willebrand factor A domain of human capillary morphogenesis gene II, flexibly fused to the 1TEL crystallization chaperone, Thr-Val linker variant, SUMO tag-free preparation	Homo sapiens	1	21.9	1.38e-07	225	33-201 (381)	77-255 (255)
5vni_A	Crystal structure of Sec23a/Sec24a/Sec22 complexed with a C-terminal FA sorting motif	Homo sapiens	1	10	8.7e-10	225	28-329 (381)	118-520 (707)
5vne_A	Crystal structure of Sec23a/Sec24a/Sec22 complexed with Emp24 sorting motif	Homo sapiens	1	11.5	9.79e-10	225	24-325 (381)	114-516 (708)
8d3d_A	VWF tubule derived from dimeric D1-A1	Homo sapiens	1	15.2	1.74e-07	225	30-199 (381)	1118-1302 (1314)
5vnm_A	Crystal structure of Sec23a/Sec24a/Sec22 complexed with 4-phenylbutyric acid (15mM soaking)	Homo sapiens	1	10.2	1.31e-09	224	28-327 (381)	118-516 (698)
5vno_A	Crystal structure of Sec23a/Sec24a/Sec22	Homo sapiens	1	10.2	8.2e-10	223	28-327 (381)	118-517 (703)
6bxb_A	Crystal structure of an extended b3 integrin P33	Homo sapiens	1	12.4	3.62e-11	222	7-284 (381)	59-371 (463)
1m2o_C	Crystal Structure of the Sec23-Sar1 complex	Saccharomyces cerevisiae	1	11.8	2.84e-10	221	24-378 (381)	105-585 (718)
1sht_X	Crystal Structure of the von Willebrand factor A domain of human capillary morphogenesis protein 2: an anthrax toxin receptor	Homo sapiens	1	22.1	3.97e-07	220	36-201 (381)	1-177 (177)
4hqk_A	Crystal structure of Plasmodium falciparum TRAP, P4212 form	Plasmodium falciparum 3D7	1	17.8	1.22e-07	220	31-198 (381)	1-188 (200)
4c2a_A	Crystal Structure of High-Affinity von Willebrand Factor A1 domain with R1306Q and I1309V Mutations in Complex with High Affinity GPIb alpha	Homo sapiens	1	14.6	5.65e-07	220	30-199 (381)	3-187 (202)
7w6b_A	Crystal Structure of PitA from pilus islet-2 of Streptococcus oralis	Streptococcus oralis ATCC 35037	1	10.6	4.1e-12	220	1-282 (381)	1-458 (782)
8fz4_B	The von Willebrand factor A domain of Anthrax toxin receptor 2	Homo sapiens	1	22.8	4.47e-07	219	33-198 (381)	1-176 (177)
8fzu_B	The von Willebrand factor A domain of human capillary morphogenesis gene II, flexibly fused to the 1TEL crystallization chaperone, Thr-Val linker variant, Expressed with SUMO tag	Homo sapiens	1	21.9	3.97e-07	219	36-199 (381)	79-246 (253)
2nup_B	Crystal Structure of the human Sec23a/24a heterodimer, complexed with the SNARE protein Sec22b	Homo sapiens	1	14.3	6.87e-10	217	33-325 (381)	145-510 (731)
6m48_B	Crystal structure of pilus adhesin, SpaC from Lactobacillus rhamnosus GG - P21212 form	Lacticaseibacillus rhamnosus GG	1	12	3.41e-11	217	3-276 (381)	68-453 (812)
7zwh_H	VWF Tubules of D1D2 and D'D3A1 domains	Homo sapiens	1	15.3	8.54e-07	216	36-199 (381)	10-188 (199)
6m3y_A	Crystal structure of pilus adhesin, SpaC from Lactobacillus rhamnosus GG - open conformation	Lacticaseibacillus rhamnosus	1	13.2	3.41e-11	216	3-276 (381)	71-448 (811)
5kyn_A	Structure of Sec23 and TANGO1 complex	Homo sapiens	1	11.1	2.23e-09	215	28-330 (381)	118-539 (730)
8d3c_A	VWF tubule derived from monomeric D1-A1	Homo sapiens	1	15.1	8.54e-07	213	30-199 (381)	1109-1293 (1305)
1qc5_B	I Domain from Integrin Alpha1-Beta1	Homo sapiens	1	17.2	2.2e-07	210	38-197 (381)	2-183 (190)
8ce6_A	Crystal structure of human Cd11b I domain in P212121 space group	Homo sapiens	1	17.2	3.12e-06	210	36-199 (381)	4-184 (196)
1m10_A	Crystal structure of the complex of Glycoprotein Ib alpha and the von Willebrand Factor A1 Domain	Homo sapiens	1	16	3.97e-07	210	30-199 (381)	1-185 (199)
5kyy_A	Crystal structure of Sec23 and TANGO1 peptide4 complex	Homo sapiens	1	9.8	8.15e-09	210	28-323 (381)	118-528 (716)
6m48_A	Crystal structure of pilus adhesin, SpaC from Lactobacillus rhamnosus GG - P21212 form	Lacticaseibacillus rhamnosus GG	1	12.3	1.58e-10	210	3-276 (381)	67-450 (813)
8fzv_A	The von Willebrand factor A domain of human capillary morphogenesis gene II, flexibly fused to the 1TEL crystallization chaperone, Ala-Ala linker variant, expressed with SUMO tag	Homo sapiens	1	24.6	9.6e-07	208	37-178 (381)	82-231 (247)
1mf7_A	INTEGRIN ALPHA M I DOMAIN	Homo sapiens	1	17	3.72e-06	207	33-199 (381)	1-184 (194)
6bxf_A	Crystal structure of an extended b3 integrin L33	Homo sapiens	1	13.7	1.11e-10	207	7-284 (381)	59-371 (463)
3ibs_B	Crystal structure of conserved hypothetical protein BatB from Bacteroides thetaiotaomicron	Bacteroides thetaiotaomicron	1	18.7	5.33e-07	206	37-199 (381)	1-197 (205)
6zga_B	COPII on membranes, inner coat	Saccharomyces cerevisiae S288C	1	12.4	1.04e-09	206	29-327 (381)	161-545 (786)
1qc5_A	I Domain from Integrin Alpha1-Beta1	Homo sapiens	1	17.5	4.74e-07	205	35-197 (381)	1-185 (192)
3jbr_F	Cryo-EM structure of the rabbit voltage-gated calcium channel Cav1.1 complex at 4.2 angstrom	Oryctolagus cuniculus	1	14.7	9.17e-09	203	34-276 (381)	189-421 (872)
1mhp_A	Crystal structure of a chimeric alpha1 integrin I-domain in complex with the Fab fragment of a humanized neutralizing antibody	Rattus norvegicus	1	17.4	6e-07	202	40-197 (381)	5-176 (184)
5hgj_A	Structure of integrin alpha1beta1 and alpha2beta1 I-domains explain differential calcium-mediated ligand recognition	Homo sapiens	1	17.2	6e-07	201	38-197 (381)	2-183 (194)
8bsh_A	COPII inner coat	Saccharomyces cerevisiae	1	12.5	1.25e-10	201	30-327 (381)	116-554 (768)
4c2b_E	Crystal Structure of High-Affinity von Willebrand Factor A1 domain with Disulfide Mutation in Complex with High Affinity GPIb alpha	Homo sapiens	1	15.5	1.45e-06	199	35-199 (381)	7-186 (199)
6to1_A	Crystal structure of three N-terminal domains of the type V pili tip protein Mfa5 from Porphyromonas gingivalis	Porphyromonas gingivalis ATCC 33277	1	12.4	6.52e-11	198	1-274 (381)	2-439 (566)
1ck4_A	CRYSTAL STRUCTURE OF RAT A1B1 INTEGRIN I-DOMAIN.	Rattus norvegicus	1	17	7.59e-07	197	37-197 (381)	2-184 (193)
6tnj_A	Crystal structure of the vWF domain of the type V pili tip protein Mfa5 from Porphyromonas gingivalis	Porphyromonas gingivalis ATCC 33277	1	21.2	1.63e-06	197	33-142 (381)	2-127 (296)
5kyw_A	crystal structure of Sec23 and TANGO1 peptide3 complex	Homo sapiens	1	10.3	3.16e-08	197	28-327 (381)	118-520 (714)
1u0o_C	The mouse von Willebrand Factor A1-botrocetin complex	Mus musculus	1	16	4.99e-06	196	34-199 (381)	3-183 (196)
3hxq_A	Crystal Structure of Von Willebrand Factor (VWF) A1 Domain in Complex with DNA Aptamer ARC1172, an Inhibitor of VWF-Platelet Binding	Homo sapiens	1	14.1	2.61e-06	196	30-199 (381)	4-188 (201)
8ft6_A	The von Willebrand factor A domain of human capillary morphogenesis gene II, flexibly fused to the 1TEL crystallization chaperone, Ala-Ala linker variant, SUMO tag-free preparation.	Homo sapiens	1	23.2	6e-07	196	36-201 (381)	81-255 (255)
1qcy_A	THE CRYSTAL STRUCTURE OF THE I-DOMAIN OF HUMAN INTEGRIN ALPHA1BETA1	Homo sapiens	1	17.4	6.75e-07	194	38-197 (381)	2-184 (193)
1aox_A	I DOMAIN FROM INTEGRIN ALPHA2-BETA1	Homo sapiens	1	14.1	4.21e-07	194	33-199 (381)	1-189 (201)
1n3y_A	Crystal structure of the alpha-X beta2 integrin I domain	Homo sapiens	1	15.6	7.59e-07	193	36-199 (381)	1-181 (189)
2odp_A	Complement component C2a, the catalytic fragment of C3- and C5-convertase of human complement	Homo sapiens	1	20.9	6e-07	192	31-193 (381)	1-202 (490)
8epl_C	Human R-type voltage-gated calcium channel Cav2.3 at 3.1 Angstrom resolution	Homo sapiens	1	15.7	9.11e-08	192	34-248 (381)	208-452 (948)
1mhp_B	Crystal structure of a chimeric alpha1 integrin I-domain in complex with the Fab fragment of a humanized neutralizing antibody	Rattus norvegicus	1	17.4	1.15e-06	191	40-197 (381)	5-184 (192)
1pt6_A	I domain from human integrin alpha1-beta1	Homo sapiens	1	16.7	1.02e-06	190	38-197 (381)	2-183 (192)
6zga_E	COPII on membranes, inner coat	Saccharomyces cerevisiae	1	12.7	6.48e-10	190	28-327 (381)	112-536 (750)
7vfu_B	Human N-type voltage gated calcium channel CaV2.2-alpha2/delta1-beta1 complex, bound to ziconotide	Homo sapiens	1	14.1	9.11e-08	190	35-247 (381)	223-466 (955)
6s4c_A	Crystal Structure of the vWFA2 subdomain of type VII collagen	Mus musculus	1	17.1	7.16e-07	189	38-201 (381)	3-185 (185)
6snk_B	Crystal structure of the Collagen VI alpha3 N2 domain	Homo sapiens	1	13.1	8.48e-06	189	36-199 (381)	3-178 (187)
8e56_F	Rabbit L-type voltage-gated calcium channel Cav1.1 in the presence of Amiodarone at 2.8 Angstrom resolution	Oryctolagus cuniculus	1	15.5	1.64e-07	186	34-248 (381)	223-467 (973)
4a0q_B	Activated Conformation of Integrin alpha1 I-Domain mutant	Homo sapiens	1	17.8	9.6e-07	185	38-197 (381)	2-183 (192)
4okr_B	Structures of Toxoplasma gondii MIC2	Toxoplasma gondii	1	14.2	1.74e-07	184	34-238 (381)	4-206 (236)
4jdu_A	The crystal structure of an aerotolerance-related membrane protein from Bacteroides fragilis NCTC 9343 with multiple mutations to serines.	Bacteroides fragilis NCTC 9343	1	17.1	3.31e-06	183	37-199 (381)	1-196 (201)
5gjw_F	Structure of the mammalian voltage-gated calcium channel Cav1.1 complex for ClassII map	Oryctolagus cuniculus	1	16.5	9.11e-08	183	39-245 (381)	205-444 (941)
6zga_A	COPII on membranes, inner coat	Saccharomyces cerevisiae	1	12	9.23e-10	182	30-327 (381)	114-537 (751)
2b2x_A	VLA1 RdeltaH I-domain complexed with a quadruple mutant of the AQC2 Fab	Rattus norvegicus	1	18.6	1.02e-06	181	38-197 (381)	2-180 (188)
6pyx_B	Calcium Activated Chloride Channel Regulator 1 (CLCA1) VWA Domain	Homo sapiens	1	19.7	6.71e-06	179	35-189 (381)	1-157 (157)
4okr_A	Structures of Toxoplasma gondii MIC2	Toxoplasma gondii	1	14	1.96e-07	178	31-271 (381)	3-206 (235)
4a0q_A	Activated Conformation of Integrin alpha1 I-Domain mutant	Homo sapiens	1	16.1	2.77e-06	177	38-197 (381)	2-178 (187)
4oku_B	Structure of Toxoplasma gondii proMIC2	Toxoplasma gondii	1	12.3	2.34e-07	177	29-237 (381)	6-217 (241)
8enu_D	Structure of the C3bB proconvertase in complex with lufaxin	Homo sapiens	1	13	1.47e-08	177	32-275 (381)	213-497 (706)
8amz_W	Spinach 19S proteasome	Spinacia oleracea	1	15.8	2.07e-06	176	35-201 (381)	1-187 (192)
3eob_I	Crystal structure the Fab fragment of Efalizumab in complex with LFA-1 I domain, Form II	Homo sapiens	1	14.1	1.14e-05	173	37-199 (381)	2-174 (179)
6cx1_E	Cryo-EM structure of Seneca Valley Virus-Anthrax Toxin Receptor 1 complex	Homo sapiens	1	22.7	3.31e-06	172	37-201 (381)	4-181 (182)
2b2x_B	VLA1 RdeltaH I-domain complexed with a quadruple mutant of the AQC2 Fab	Rattus norvegicus	1	17.5	7.11e-06	169	38-197 (381)	1-168 (176)
8if4_A	Structure of human alpha-2/delta-1 without mirogabalin	Homo sapiens	1	15.5	3.14e-07	169	34-248 (381)	205-449 (915)
6rhv_C	Crystal structure of mouse CD11b I-domain (CD11b-I) in complex with Staphylococcus aureus octameric bi-component leukocidin LukGH (LukH K319A mutant)	Mus musculus	1	15.9	5.26e-05	165	38-189 (381)	2-170 (170)
3hs0_D	Cobra Venom Factor (CVF) in complex with human factor B	Homo sapiens	1	16.3	9.11e-08	165	32-261 (381)	212-479 (699)
5thp_O	Rhodocetin in complex with the integrin alpha2-A domain	Homo sapiens	1	13.8	8.48e-06	163	38-199 (381)	3-185 (191)
3hi6_B	Crystal structure of intermediate affinity I domain of integrin LFA-1 with the Fab fragment of its antibody AL-57	Homo sapiens	1	16.4	1.44e-05	162	37-168 (381)	2-138 (180)
8eog_D	Structure of the human L-type voltage-gated calcium channel Cav1.2 complexed with L-leucine	Oryctolagus cuniculus	1	11.6	1.23e-08	162	34-306 (381)	215-602 (955)
1idn_1	MAC-1 I DOMAIN METAL FREE	Homo sapiens	1	14.4	3.49e-05	161	39-199 (381)	2-179 (189)
8eok_D	Structure of the C3bB proconvertase in complex with lufaxin and factor Xa	Homo sapiens	1	13	1.22e-07	159	28-259 (381)	203-467 (702)
8if3_A	Structure of human alpha-2/delta-1 with mirogabalin	Homo sapiens	1	16.3	2.94e-06	158	34-247 (381)	205-448 (917)
7usm_B	Integrin alphaM/beta2 ectodomain	Homo sapiens	1	10.9	1.75e-08	157	2-276 (381)	59-419 (673)
1dgq_MODEL_2_A	NMR SOLUTION STRUCTURE OF THE INSERTED DOMAIN OF HUMAN LEUKOCYTE FUNCTION ASSOCIATED ANTIGEN-1	Homo sapiens	1	12.6	4.96e-05	156	37-199 (381)	6-178 (188)
5e6r_B	Structures of leukocyte integrin aLb2: The aI domain, the headpiece, and the pocket for the internal ligand	Homo sapiens	1	10.9	5.4e-09	156	1-282 (381)	59-417 (454)
1dzi_A	integrin alpha2 I domain / collagen complex	Homo sapiens	1	16.8	1.07e-05	155	38-197 (381)	3-184 (185)
5thp_R	Rhodocetin in complex with the integrin alpha2-A domain	Homo sapiens	1	13.8	3.49e-05	155	38-198 (381)	2-180 (187)
2xgg_A	Structure of Toxoplasma gondii Micronemal Protein 2 A_I Domain	Toxoplasma gondii	1	18.3	1.72e-05	154	35-187 (381)	1-144 (147)
2ok5_A	Human Complement factor B	Homo sapiens	1	12.9	2.79e-07	154	32-275 (381)	215-495 (710)
2i6s_A	Complement component C2a	Homo sapiens	1	14.6	4.74e-07	153	33-272 (381)	1-281 (497)
5thp_C	Rhodocetin in complex with the integrin alpha2-A domain	Homo sapiens	1	14.8	2.92e-05	152	38-199 (381)	2-183 (190)
6om1_B	Crystal structure of an atypical integrin	Homo sapiens	1	9.8	2.08e-07	152	4-276 (381)	2-332 (333)
5e6r_A	Structures of leukocyte integrin aLb2: The aI domain, the headpiece, and the pocket for the internal ligand	Homo sapiens	1	11	3.55e-08	152	7-276 (381)	84-418 (581)
7p2d_A	Structure of alphaMbeta2/Cd11bCD18 headpiece in complex with a nanobody	Homo sapiens	1	9.6	3.16e-08	152	13-280 (381)	76-499 (751)
5e6s_A	Structures of leukocyte integrin aLB2: The aI domain, the headpiece, and the pocket for the internal ligand	Homo sapiens	1	11	8.59e-08	151	7-276 (381)	84-417 (579)
5e6s_D	Structures of leukocyte integrin aLB2: The aI domain, the headpiece, and the pocket for the internal ligand	Homo sapiens	1	10.7	2.09e-08	150	1-282 (381)	59-418 (455)
2i6q_A	Complement component C2a	Homo sapiens	1	14.2	7.2e-08	150	33-270 (381)	5-290 (503)
5es4_A	RE-REFINEMENT OF INTEGRIN ALPHAXBETA2 ECTODOMAIN IN THE CLOSED/BENT CONFORMATION	Homo sapiens	1	15	3.77e-08	149	2-276 (381)	76-431 (1080)
5e6s_C	Structures of leukocyte integrin aLB2: The aI domain, the headpiece, and the pocket for the internal ligand	Homo sapiens	1	11	1.22e-07	148	7-276 (381)	84-415 (578)
4hqo_A	Crystal structure of Plasmodium vivax TRAP protein	Plasmodium vivax	1	13	1.29e-06	147	17-284 (381)	1-255 (257)
4neh_B	An internal ligand-bound, metastable state of a leukocyte integrin, aXb2	Homo sapiens	1	11.3	2.22e-08	147	2-282 (381)	60-418 (668)
5e6u_A	Structures of leukocyte integrin aLb2: The aI domain, the headpiece, and the pocket for the internal ligand	Homo sapiens	1	11.8	8.1e-08	146	7-276 (381)	84-419 (583)
3hs0_I	Cobra Venom Factor (CVF) in complex with human factor B	Homo sapiens	1	13.9	7.59e-07	146	32-240 (381)	212-478 (704)
2odq_A	Complement component C2a, the catalytic fragment of C3- and C5-convertase of human complement	Homo sapiens	1	13.6	1.96e-07	145	36-281 (381)	6-326 (492)
7jtq_A	Human Complement Factor B Inhibited by a Slow Off-Rate Modified Aptamer of 31 Bases	Homo sapiens	1	14	5.03e-07	145	35-270 (381)	214-490 (703)
2m32_MODEL_5_A	Alpha-1 integrin I-domain in complex with GLOGEN triple helical peptide	Homo sapiens	1	18.4	6.71e-06	144	35-199 (381)	1-187 (192)
6ujc_B	Integrin alpha-v beta-8 in complex with the Fabs C6-RGD3 and 11D12v2	Homo sapiens	1	10	5.36e-08	144	1-282 (381)	1-358 (359)
7ba2_B	D319A mutant of the PilB minor pilin from Streptococcus sanguinis	Streptococcus sanguinis	1	11.3	2.08e-07	144	3-199 (381)	83-409 (420)
3hrz_D	Cobra Venom Factor (CVF) in complex with human factor B	Homo sapiens	1	13.6	5.65e-07	144	32-249 (381)	212-522 (693)
1mq8_D	Crystal structure of alphaL I domain in complex with ICAM-1	Homo sapiens	1	16.5	9.49e-05	142	39-163 (381)	2-133 (177)
6om1_H	Crystal structure of an atypical integrin	Homo sapiens	1	9.5	1.96e-07	142	8-274 (381)	3-333 (336)
1mq9_A	Crystal structure of high affinity alphaL I domain with ligand mimetic crystal contact	Homo sapiens	1	14.8	0.000258	141	37-163 (381)	2-133 (173)
3tcx_B	Structure of Engineered Single Domain ICAM-1 D1 with High-Affinity aL Integrin I Domain of Native C-Terminal Helix Conformation	Homo sapiens	1	15.6	0.000171	141	37-163 (381)	2-135 (180)
5e6u_B	Structures of leukocyte integrin aLb2: The aI domain, the headpiece, and the pocket for the internal ligand	Homo sapiens	1	10.3	9.66e-08	141	1-282 (381)	59-416 (453)
4um9_D	Crystal structure of alpha V beta 6 with peptide	Homo sapiens	1	10.2	1.96e-07	141	20-282 (381)	89-422 (455)
7b7p_B	PilB minor pilin from Streptococcus sanguinis	Streptococcus sanguinis	1	11.3	8.54e-07	140	3-199 (381)	83-405 (420)
6orb_A	Full-length S. pombe Mdn1 in the presence of ATP and Rbin-1	Schizosaccharomyces pombe	1	17.7	4.68e-05	140	36-178 (381)	3142-3300 (3352)
6ro4_E	Structure of the core TFIIH-XPA-DNA complex	Homo sapiens	1	16.2	7.5e-05	138	39-197 (381)	3-179 (237)
6rur_L	Structure of the SCIN stabilized C3bBb convertase bound to properdin	Homo sapiens	1	13.7	2.77e-06	138	35-275 (381)	7-293 (505)
4rck_B	Crystal Structure of Uncharacterized Membrane Spanning Protein from Vibrio fischeri	Aliivibrio fischeri ES114	1	19.2	1.29e-06	137	41-199 (381)	6-196 (202)
3vi3_D	Crystal structure of alpha5beta1 integrin headpiece (ligand-free form)	Homo sapiens	1	12.3	1.22e-07	136	6-282 (381)	51-428 (432)
7noz_F	Structure of the nanobody stablized properdin bound alternative pathway proconvertase C3b:FB:FP	Homo sapiens	1	15	1.37e-06	136	37-275 (381)	215-499 (712)
4wk4_B	Metal Ion and Ligand Binding of Integrin	Homo sapiens	1	12.7	1.46e-07	135	6-282 (381)	61-431 (435)
6v4p_B	Structure of the integrin AlphaIIbBeta3-Abciximab complex	Homo sapiens	1	8.9	4.74e-07	133	6-282 (381)	1-375 (375)
1u8c_B	A novel adaptation of the integrin PSI domain revealed from its crystal structure	Homo sapiens	1	9.2	4.21e-07	133	6-282 (381)	55-429 (599)
4bj3_B	Integrin alpha2 I domain E318W-collagen complex	Homo sapiens	1	13.7	0.000192	132	38-193 (381)	1-178 (180)
8fzv_B	The von Willebrand factor A domain of human capillary morphogenesis gene II, flexibly fused to the 1TEL crystallization chaperone, Ala-Ala linker variant, expressed with SUMO tag	Homo sapiens	1	23.6	0.000161	132	33-200 (381)	77-247 (248)
3vi4_D	Crystal structure of alpha5beta1 integrin headpiece in complex with RGD peptide	Homo sapiens	1	12	2.48e-07	132	6-282 (381)	52-429 (433)
1t0p_A	Structural Basis of ICAM recognition by integrin alpahLbeta2 revealed in the complex structure of binding domains of ICAM-3 and alphaLbeta2 at 1.65 A	Homo sapiens	1	15.8	0.000662	131	35-165 (381)	1-136 (174)
6om1_F	Crystal structure of an atypical integrin	Homo sapiens	1	10.7	1.45e-06	131	19-276 (381)	17-330 (332)
6sn1_B	Crystal structure of the human INTS13-INTS14 complex	Homo sapiens	1	9.7	3.97e-07	131	40-354 (381)	2-483 (503)
3bn3_A	crystal structure of ICAM-5 in complex with aL I domain	Homo sapiens	1	17.4	0.000181	130	37-163 (381)	2-135 (180)
5o85_A	p34-p44 complex	Homo sapiens	1	14.3	7.95e-05	130	38-200 (381)	1-187 (190)
5o85_C	p34-p44 complex	Homo sapiens	1	14	0.000258	130	35-198 (381)	1-193 (198)
7y1t_B	Complex of integrin alphaV/beta8 and L-TGF-beta1 at a ratio of 1:2	Homo sapiens	1	10.3	8.54e-07	130	9-284 (381)	5-345 (345)
3ze2_D	Integrin alphaIIB beta3 headpiece and RGD peptide complex	Homo sapiens	1	9.3	8.05e-07	130	13-276 (381)	24-364 (367)
7cec_B	Structure of alpha6beta1 integrin in complex with laminin-511	Homo sapiens	1	11.6	1.46e-07	130	6-281 (381)	55-423 (427)
7nwl_B	Cryo-EM structure of human integrin alpha5beta1 (open form) in complex with fibronectin and TS2/16 Fv-clasp	Homo sapiens	1	11.8	8.59e-08	129	13-279 (381)	99-440 (441)
5es4_H	RE-REFINEMENT OF INTEGRIN ALPHAXBETA2 ECTODOMAIN IN THE CLOSED/BENT CONFORMATION	Homo sapiens	1	10.6	3.53e-07	128	1-282 (381)	59-422 (674)
4um9_B	Crystal structure of alpha V beta 6 with peptide	Homo sapiens	1	9.5	6.75e-07	127	14-282 (381)	76-415 (448)
4g1e_B	Crystal structure of integrin alpha V beta 3 with coil-coiled tag.	Homo sapiens	1	10.4	9.6e-07	127	4-284 (381)	56-432 (709)
6om1_D	Crystal structure of an atypical integrin	Homo sapiens	1	11.2	2.32e-06	125	24-273 (381)	13-312 (312)
2xwj_I	Crystal Structure of Complement C3b in Complex with Factor B	Homo sapiens	1	11.8	3.31e-06	125	37-281 (381)	218-540 (712)
8tcf_B	Integrin alpha-v beta-8 in complex with minibinder B8_BP_dsulf	Homo sapiens	1	9.9	9.6e-07	124	1-282 (381)	1-358 (359)
2xwb_F	Crystal Structure of Complement C3b in complex with Factors B and D	Homo sapiens	1	13.6	1.53e-05	123	35-275 (381)	216-500 (714)
4nen_A	An internal ligand-bound, metastable state of a leukocyte integrin, aXb2	Homo sapiens	1	15.1	1.09e-07	123	13-276 (381)	78-431 (1063)
6rhw_C	Crystal structure of human CD11b I-domain (CD11b-I) in complex with Staphylococcus aureus octameric bi-component leukocidin LukGH	Homo sapiens	1	18.2	0.00191	122	38-166 (381)	2-142 (168)
6gvw_I	Crystal structure of the BRCA1-A complex	Mus musculus	1	12.8	4.68e-05	122	28-197 (381)	3-216 (238)
6djp_B	Integrin alpha-v beta-8 in complex with the Fabs 8B8 and 68	Homo sapiens	1	9.2	8.05e-07	122	2-282 (381)	5-352 (353)
8t2u_B	Cryo-EM Structures of Full-length Integrin alphaIIbbeta3 in Native Lipids complexed with Eptifibatide	Homo sapiens	1	10.4	5.65e-07	122	13-276 (381)	26-366 (368)
2vc2_B	Re-refinement of Integrin AlphaIIbBeta3 Headpiece Bound to Antagonist L-739758	Homo sapiens	1	10	3.97e-07	121	6-276 (381)	58-426 (457)
4wjk_B	Metal Ion and Ligand Binding of Integrin	Homo sapiens	1	12.1	7.59e-07	119	6-276 (381)	51-416 (424)
3zdz_B	Integrin alphaIIB beta3 headpiece and RGD peptide complex	Homo sapiens	1	10	1.45e-06	119	7-284 (381)	57-432 (464)
6om2_D	Crystal structure of atypical integrin alphaV beta8 with proTGF-beta1 ligand peptide	Homo sapiens	1	9.6	1.84e-06	118	22-260 (381)	13-319 (330)
3fcs_B	Structure of complete ectodomain of integrin aIIBb3	Homo sapiens	1	10	1.45e-06	118	5-284 (381)	59-430 (680)
4g1m_B	Re-refinement of alpha V beta 3 structure	Homo sapiens	1	10.5	1.29e-06	117	7-282 (381)	59-432 (692)
2xwb_H	Crystal Structure of Complement C3b in complex with Factors B and D	Homo sapiens	1	11.6	4.71e-06	117	35-265 (381)	218-594 (711)
7zsb_4	Yeast RNA polymerase II transcription pre-initiation complex with the +1 nucleosome and NTP, complex C	Saccharomyces cerevisiae	1	12	3.7e-05	116	35-199 (381)	1-228 (306)
3fcs_D	Structure of complete ectodomain of integrin aIIBb3	Homo sapiens	1	10.5	2.07e-06	113	5-284 (381)	59-431 (603)
2xwj_L	Crystal Structure of Complement C3b in Complex with Factor B	Homo sapiens	1	11	1.44e-05	112	35-276 (381)	216-591 (711)
4neh_A	An internal ligand-bound, metastable state of a leukocyte integrin, aXb2	Homo sapiens	1	14	1.37e-06	110	7-276 (381)	87-431 (1084)
2x31_F	Modelling of the complex between subunits BchI and BchD of magnesium chelatase based on single-particle cryo-EM reconstruction at 7.5 ang	Rhodobacter capsulatus	1	22.2	0.000308	109	35-200 (381)	2-185 (188)
7ceb_B	Crystal structure of alpha6beta1 integrin headpiece	Homo sapiens	1	12	8e-06	108	6-282 (381)	4-373 (374)
2iue_MODEL_5_A	Pactolus I-domain: Functional Switching of the Rossmann Fold	Mus musculus	1	10.9	0.000493	101	33-199 (381)	1-204 (212)
1jv2_B	CRYSTAL STRUCTURE OF THE EXTRACELLULAR SEGMENT OF INTEGRIN ALPHAVBETA3	Homo sapiens	1	10	8e-06	101	4-282 (381)	1-378 (539)
7nfc_B	Cryo-EM structure of NHEJ super-complex (dimer)	Homo sapiens	1	11.7	0.00436	100	35-148 (381)	2-144 (476)
6o9m_4	Structure of the human apo TFIIH	Homo sapiens	1	11.5	0.000438	98	35-197 (381)	1-222 (295)
6om2_B	Crystal structure of atypical integrin alphaV beta8 with proTGF-beta1 ligand peptide	Homo sapiens	1	11.3	8.94e-05	98	23-251 (381)	10-300 (310)
6ylh_v	Rix1-Rea1 pre-60S particle - full composite structure	Saccharomyces cerevisiae	1	16.2	0.00242	98	36-199 (381)	3423-3620 (3629)
2win_I	C3 convertase (C3bBb) stabilized by SCIN	Homo sapiens	1	12.3	0.000152	97	38-254 (381)	11-341 (507)
7nxd_B	Cryo-EM structure of human integrin alpha5beta1 in the half-bent conformation	Homo sapiens	1	10.7	5.3e-06	96	6-286 (381)	62-443 (690)
2xwj_K	Crystal Structure of Complement C3b in Complex with Factor B	Homo sapiens	1	10.8	5.92e-05	94	35-276 (381)	216-593 (713)
6sn1_A	Crystal structure of the human INTS13-INTS14 complex	Homo sapiens	1	7.1	1.44e-05	93	34-380 (381)	5-515 (517)
6k88_B	RGLG1 MIDAS binds calcium ion	Arabidopsis thaliana	1	13	0.00106	92	39-202 (381)	2-221 (228)
7nfe_B	Cryo-EM structure of NHEJ super-complex (monomer)	Homo sapiens	0.99	9.3	0.000624	88	33-227 (381)	1-217 (475)
5ffo_B	Integrin alpha V beta 6 in complex with pro-TGF-beta	Homo sapiens	0.99	13.3	0.00242	87	35-200 (381)	1-238 (242)
8bot_C	Cryo-EM structure of NHEJ supercomplex(trimer)	Homo sapiens	0.99	14	0.0133	84	40-158 (381)	5-151 (511)
2nvo_A	Crystal structure of Deinococcus radiodurans RO (RSR) protein	Deinococcus radiodurans	0.91	18.1	0.00585	68	32-202 (381)	320-496 (496)
8dz8_B	Neoleukin 4, a de novo designed IL-4 mimetic	synthetic construct	0.69	8.6	0.269	57	294-378 (381)	4-93 (94)
8dz8_G	Neoleukin 4, a de novo designed IL-4 mimetic	synthetic construct	0.63	8.6	0.34	55	294-379 (381)	3-90 (94)
6dg6_D	Structure of a de novo designed Interleukin-2/Interleukin-15 mimetic	synthetic construct	0.57	7.4	0.689	53	295-380 (381)	7-100 (100)
6dg6_F	Structure of a de novo designed Interleukin-2/Interleukin-15 mimetic	synthetic construct	0.51	7.5	0.925	51	295-380 (381)	5-97 (97)
8b5l_v	Cryo-EM structure of ribosome-Sec61-TRAP (TRanslocon Associated Protein) translocon complex	Oryctolagus cuniculus	0.47	13.5	0.078	50	204-290 (381)	29-121 (158)
4m0c_B	The crystal structure of a FMN-dependent NADH-azoreductase from Bacillus anthracis str. Ames Ancestor in complex with FMN.	Bacillus anthracis str. 'Ames Ancestor'	0.47	12.7	0.0323	50	40-199 (381)	2-199 (210)
3u7i_A	The crystal structure of FMN-dependent NADH-azoreductase 1 (GBAA0966) from Bacillus anthracis str. Ames Ancestor	Bacillus anthracis str. 'Ames Ancestor'	0.47	14.2	0.019	50	38-199 (381)	2-202 (218)
3u3b_B	Crystal Structure of Computationally Redesigned Four-Helix Bundle	synthetic construct	0.44	14.2	0.981	49	298-378 (381)	2-98 (102)
6dg5_A	Structure of a de novo designed Interleukin-2/Interleukin-15 mimetic complex with IL-2Rb and IL-2Rg	synthetic construct	0.41	10.2	0.872	48	295-380 (381)	6-93 (93)
8b6l_F	Subtomogram average of the human Sec61-TRAP-OSTA-translocon	Homo sapiens	0.41	14.4	0.111	48	207-290 (381)	33-126 (153)
2vj0_A	Crystal structure of the alpha-adaptin appendage domain, from the AP2 adaptor complex, in complex with an FXDNF peptide from amphiphysin1 and a WVXF peptide from synaptojanin P170	Mus musculus	0.41	14.4	0.0931	48	204-280 (381)	49-129 (246)
6mzo_A	X-ray Structure of an Inactive Zymogen C11 Protease from Parabacteroides distasonis	Parabacteroides distasonis ATCC 8503	0.41	9.6	0.0363	48	33-183 (381)	4-172 (346)
2we7_A	Crystal structure of Mycobacterium tuberculosis Rv0376c homologue from Mycobacterium smegmatis	Mycolicibacterium smegmatis MC2 155	0.38	14.8	0.118	47	36-163 (381)	188-289 (343)
6dg6_E	Structure of a de novo designed Interleukin-2/Interleukin-15 mimetic	synthetic construct	0.35	7.1	1.48	46	293-380 (381)	3-100 (100)
6gfl_B	Crystal structure of the Escherichia coli nucleosidase PpnN (apo form)	Escherichia coli K-12	0.35	13.3	0.078	46	32-200 (381)	132-322 (429)
2we8_B	Crystal structure of Mycobacterium tuberculosis Rv0376c homologue from Mycobacterium smegmatis	Mycolicibacterium smegmatis MC2 155	0.33	15	0.105	45	35-199 (381)	179-328 (335)
6nag_B	X-ray structure of a secreted C11 cysteine protease from Bacteroides thetaiotaomicron "iotapain	Bacteroides thetaiotaomicron VPI-5482	0.33	10.1	0.0617	45	35-183 (381)	2-185 (350)
3msp_MODEL_18_B	MOTILE MAJOR SPERM PROTEIN (MSP) OF ASCARIS SUUM, NMR, 20 STRUCTURES	Ascaris suum	0.3	9	0.269	44	204-281 (381)	33-124 (126)
3au0_A	Structural and biochemical characterization of ClfB:ligand interactions	Staphylococcus aureus subsp. aureus N315	0.3	12.1	0.118	44	207-284 (381)	201-330 (339)
6cpg_E	Structure of dephosphorylated Aurora A (122-403) in complex with inhibiting monobody and AT9283 in an inactive conformation	synthetic construct	0.28	11.1	0.484	43	207-278 (381)	26-87 (88)
8dz8_C	Neoleukin 4, a de novo designed IL-4 mimetic	synthetic construct	0.28	10.4	1.1	43	293-380 (381)	2-93 (96)
2lff_MODEL_5_A	Solution structure of Diiron protein in presence of 8 eq Zn2+, Northeast Structural Genomics consortium target OR21	Escherichia coli	0.28	12.3	0.775	43	290-376 (381)	2-106 (115)
4kkr_A	Crystal structure of Vibrio cholerae RbmA (crystal form 3)	Vibrio cholerae MJ-1236	0.25	11.3	0.168	42	204-282 (381)	143-224 (224)
2we8_A	Crystal structure of Mycobacterium tuberculosis Rv0376c homologue from Mycobacterium smegmatis	Mycolicibacterium smegmatis MC2 155	0.25	13.8	0.158	42	35-163 (381)	188-290 (345)
7nxd_A	Cryo-EM structure of human integrin alpha5beta1 in the half-bent conformation	Homo sapiens	0.25	9.3	0.0828	42	202-282 (381)	642-748 (905)
7ohi_A	FCHO1-peptide-AP2 alpha ear complex	Mus musculus	0.23	16	0.513	41	204-280 (381)	53-133 (250)
6e18_A	Crystal structure of Chlamydomonas reinhardtii HAP2 ectodomain provides structural insights of functional loops in green algae.	Chlamydomonas reinhardtii	0.23	12.7	0.225	41	204-285 (381)	436-521 (529)
7sqc_T2	Ciliary C1 central pair apparatus isolated from Chlamydomonas reinhardtii	Chlamydomonas reinhardtii	0.23	13.4	0.111	41	204-284 (381)	334-415 (545)
4u4j_A	Crystal structure of Salmonella alpha-2-macroglobulin mutant Y1175G	Salmonella enterica subsp. enterica serovar Typhimurium str. LT2	0.23	9.1	0.302	41	204-282 (381)	937-1020 (1538)
1sr2_MODEL_14_A	Solution structure of the Escherichia coli YojN Histidine-Phosphotransferase (HPt) domain	Escherichia coli	0.21	10.3	2.52	40	286-372 (381)	38-114 (116)
3s2z_B	Crystal structure of the Lactobacillus johnsonii cinnamoyl esterase LJ0536 S106A mutant in complex with caffeic acid	Lactobacillus johnsonii	0.21	9.2	0.0548	40	2-199 (381)	6-247 (250)
6gfl_A	Crystal structure of the Escherichia coli nucleosidase PpnN (apo form)	Escherichia coli K-12	0.21	14	0.361	40	33-200 (381)	134-323 (431)
2r39_A	Crystal structure of FixG-related protein from Vibrio parahaemolyticus	Vibrio parahaemolyticus RIMD 2210633	0.2	15.6	0.105	39	204-279 (381)	30-107 (109)
3mnm_B	Crystal structure of GAE domain of GGA2p from Saccharomyces cerevisiae	Saccharomyces cerevisiae	0.2	15.1	0.43	39	204-282 (381)	33-112 (112)
5jtw_E	Crystal structure of complement C4b re-refined using iMDFF	Homo sapiens	0.2	10.2	0.34	39	204-284 (381)	99-182 (632)
6ehg_B	complement component C3b in complex with a nanobody	Homo sapiens	0.2	12.3	0.302	39	208-281 (381)	104-181 (903)
4u48_A	Crystal structure of Salmonella alpha-2-macroglobulin	Salmonella enterica subsp. enterica serovar Typhimurium str. LT2	0.2	9.1	0.321	39	204-282 (381)	937-1020 (1538)
1sr2_MODEL_3_A	Solution structure of the Escherichia coli YojN Histidine-Phosphotransferase (HPt) domain	Escherichia coli	0.18	7.5	3.19	38	304-378 (381)	46-115 (116)
4be5_A	V. cholera biofilm scaffolding protein RbmA	Vibrio cholerae MJ-1236	0.18	11.3	0.361	38	204-282 (381)	143-224 (224)
4be6_A	V. cholera biofilm scaffolding protein RbmA	Vibrio cholerae MJ-1236	0.18	11.3	0.361	38	204-282 (381)	144-225 (225)
5jpn_B	Structure of human complement C4 rebuilt using iMDFF	Homo sapiens	0.18	10.5	0.545	38	204-282 (381)	137-218 (697)
1sr2_MODEL_13_A	Solution structure of the Escherichia coli YojN Histidine-Phosphotransferase (HPt) domain	Escherichia coli	0.16	13.9	1.48	37	266-378 (381)	2-115 (116)
5ln8_A	Crystal structure of self-complemented MyfA, the major subunit of Myf fimbriae from Yersinia enterocolitica, in complex with galactose	Yersinia enterocolitica	0.16	7.9	0.65	37	207-276 (381)	34-118 (123)
1gsm_A	A reassessment of the MAdCAM-1 structure and its role in integrin recognition.	Homo sapiens	0.16	12.3	0.239	37	209-281 (381)	124-203 (206)
3iqe_D	Structure of F420 dependent methylene-tetrahydromethanopterin dehydrogenase in complex with methylene-tetrahydromethanopterin and coenzyme F420	Methanopyrus kandleri	0.16	12.2	0.484	37	38-184 (381)	3-117 (282)
3asw_A	Structural and biochemical characterization of ClfB:ligand interactions	Staphylococcus aureus subsp. aureus N315	0.16	11.5	0.302	37	207-282 (381)	192-320 (320)
7akk_A	Structure of a complement factor-receptor complex	Homo sapiens	0.16	10.1	0.383	37	204-284 (381)	100-185 (842)
5lo7_B	Crystal structure of self-complemented MyfA, the major subunit of Myf fimbriae from Yersinia enterocolitica	Yersinia enterocolitica	0.15	7.2	0.484	36	207-281 (381)	34-126 (126)
6aox_A	F9 pilus adhesin FmlH lectin domain from E. coli UTI89 co-crystallized with TF antigen	Escherichia coli UTI89	0.15	13.2	0.302	36	209-282 (381)	52-145 (146)
7b2p_B	Cryo-EM structure of complement C4b in complex with nanobody B5	Homo sapiens	0.15	12.9	0.613	36	204-281 (381)	90-170 (610)
4g1m_A	Re-refinement of alpha V beta 3 structure	Homo sapiens	0.15	9.1	0.321	36	204-282 (381)	635-739 (929)
1jzd_C	DsbC-DsbDalpha complex	Escherichia coli	0.14	12.7	0.43	35	209-283 (381)	38-118 (118)
1om9_B	Structure of the GGA1-appendage in complex with the p56 binding peptide	Homo sapiens	0.14	10.4	1.04	35	204-278 (381)	50-131 (142)
4hd9_A	Crystal structure of native human MAdCAM-1 D1D2 domain	Homo sapiens	0.14	11.7	0.383	35	209-281 (381)	124-198 (198)
3frp_G	Crystal Structure of Cobra Venom Factor, a Co-factor for C3- and C5 convertase CVFBb	Naja kaouthia	0.14	9.5	0.65	35	204-281 (381)	98-179 (215)
5ehf_A	Laccase from Antrodiella faginea	Antrodiella faginea	0.14	10.2	0.212	35	207-276 (381)	207-282 (497)
7qiv_B	Structure of human C3b in complex with the EWE nanobody	Homo sapiens	0.14	12.3	0.484	35	208-281 (381)	104-181 (903)
4mmy_A	Integrin AlphaVBeta3 ectodomain bound to the tenth domain of Fibronectin with the IAKGDWND motif	Homo sapiens	0.14	8.4	0.406	35	207-282 (381)	638-739 (924)
3myf_B	The Crystal Structure of the HPT domain from the Hpt Sensor Hybrid Histidine Kinase from Shewanella to 1.80A	Shewanella sp. W3-18-1	0.13	13.1	2.24	34	303-379 (381)	22-105 (114)
4bcx_A	gamma 2 adaptin EAR domain crystal structure	Homo sapiens	0.13	17.9	0.775	34	210-276 (381)	48-112 (120)
1na8_B	Crystal structure of ADP-ribosylation factor binding protein GGA1	Homo sapiens	0.13	14.1	1.32	34	204-276 (381)	53-134 (145)
4css_A	Crystal structure of FimH in complex with a sulfonamide biphenyl alpha D-mannoside	Escherichia coli K-12	0.13	10.4	0.158	34	209-281 (381)	70-149 (155)
2qki_E	Human C3c in complex with the inhibitor compstatin	Homo sapiens	0.13	12.7	0.613	34	207-284 (381)	105-186 (186)
5uiz_B	Structure of T.fusca AA10A	Thermobifida fusca	0.13	12.1	1.1	34	207-280 (381)	110-186 (186)
3hs0_G	Cobra Venom Factor (CVF) in complex with human factor B	Naja kaouthia	0.13	9.1	0.775	34	204-284 (381)	100-184 (233)
6lik_A	Crystal Structure of Lectin from Pleurotus ostreatus in complex with Galactose	Pleurotus ostreatus	0.13	9.5	0.689	34	207-285 (381)	51-152 (337)
8cem_A	Structure of bovine native C3, re-refinement	Bos taurus	0.13	10.8	0.613	34	209-279 (381)	182-252 (975)
2a73_B	Human Complement Component C3	Homo sapiens	0.13	11.4	0.689	34	204-281 (381)	170-252 (976)
4u59_A	Crystal structure of Salmonella alpha-2-macroglobulin reacted with methylamine	Salmonella enterica subsp. enterica serovar Typhimurium	0.13	10.3	0.65	34	204-282 (381)	937-1020 (1537)
1fr0_MODEL_18_A	SOLUTION STRUCTURE OF THE HISTIDINE-CONTAINING PHOSPHOTRANSFER DOMAIN OF ANAEROBIC SENSOR KINASE ARCB FROM ESCHERICHIA COLI.	Escherichia coli	0.12	15.2	1.48	33	289-379 (381)	23-119 (125)
1vrs_B	Crystal structure of the disulfide-linked complex between the N-terminal and C-terminal domain of the electron transfer catalyst DsbD	Escherichia coli str. K-12 substr. W3110	0.12	12.7	0.545	33	211-283 (381)	45-125 (125)
4hcr_B	Crystal structure of human MAdCAM-1 D1D2 complexed with Fab PF-547659	Homo sapiens	0.12	9.5	0.406	33	204-279 (381)	112-193 (194)
4bei_D	V. cholera biofilm scaffolding protein RbmA in complex with 18-crown- 6	Vibrio cholerae MJ-1236	0.12	11.3	0.872	33	204-282 (381)	153-234 (234)
7sqc_F1	Ciliary C1 central pair apparatus isolated from Chlamydomonas reinhardtii	Chlamydomonas reinhardtii	0.12	11.8	0.383	33	206-276 (381)	411-479 (482)
5fob_B	Crystal Structure of Human Complement C3b in complex with Smallpox Inhibitor of Complement (SPICE)	Homo sapiens	0.12	11.5	0.981	33	208-282 (381)	108-182 (902)
1jpe_A	Crystal structure of DsbD-alpha; the N-terminal domain of DsbD	Escherichia coli	0.11	11.6	0.981	32	209-283 (381)	36-116 (116)
5lo7_A	Crystal structure of self-complemented MyfA, the major subunit of Myf fimbriae from Yersinia enterocolitica	Yersinia enterocolitica	0.11	6.3	0.981	32	207-281 (381)	34-125 (125)
4hc1_B	Crystal structure of a loop deleted mutant of human MAdCAM-1 D1D2 complexed with Fab 10G3	Homo sapiens	0.11	10	0.457	32	209-285 (381)	116-195 (198)
5g50_B	Vibrio cholerae scaffolding protein RbmA in complex with magnesium.	Vibrio cholerae MJ-1236	0.11	11.3	0.925	32	204-282 (381)	147-228 (228)
8gsx_A	X-ray structure of Clostridium perfringens pili protein B collagen-binding domains	Clostridium perfringens str. 13	0.11	12.7	0.65	32	207-284 (381)	156-259 (259)
2xwb_B	Crystal Structure of Complement C3b in complex with Factors B and D	Homo sapiens	0.11	10.4	1.04	32	204-281 (381)	100-182 (901)
7s64_A	Intermediate-form oocyte/egg Alpha-2-Macroglobulin (A2Moo) tetramer	Xenopus laevis	0.11	10.7	0.981	32	207-282 (381)	762-849 (1396)
3zy7_B	Crystal structure of computationally redesigned gamma-adaptin appendage domain forming a symmetric homodimer	Mus musculus	0.1	12.9	0.823	31	204-288 (381)	31-114 (116)
1gyv_A	Gamma-adaptin appendage domain from clathrin adaptor AP1, L762E mutant	Mus musculus	0.1	15.6	0.613	31	204-279 (381)	35-115 (120)
1vrs_A	Crystal structure of the disulfide-linked complex between the N-terminal and C-terminal domain of the electron transfer catalyst DsbD	Escherichia coli str. K-12 substr. W3110	0.1	13.6	0.925	31	211-283 (381)	41-121 (121)
2dwy_C	Crystal Structure Analysis of GGA1-GAE	Homo sapiens	0.1	11.7	0.823	31	204-276 (381)	40-121 (132)
7wwo_A	Dimer form of hypothetical protein TTHA1873 from Thermus thermophilus	Thermus thermophilus HB8	0.1	8.6	0.212	31	209-280 (381)	71-157 (158)
6ndq_B	Crystal structure of a LPMO from Kitasatospora papulosa	[Kitasatospora] papulosa	0.1	9.5	2.11	31	207-282 (381)	110-188 (189)
6arq_D	Crystal structure of CD96 (D1) bound to CD155/necl-5 (D1-3)	Homo sapiens	0.1	18.9	0.775	31	210-279 (381)	145-210 (300)
4fom_A	Crystal structure of human nectin-3 full ectodomain (D1-D3)	Homo sapiens	0.1	18.4	0.269	31	201-282 (381)	131-211 (302)
2bzd_C	Galactose recognition by the carbohydrate-binding module of a bacterial sialidase.	Micromonospora viridifaciens	0.1	15.3	1.17	31	207-281 (381)	388-454 (600)
7b2m_B	Cryo-EM structure of complement C4b in complex with nanobody E3	Homo sapiens	0.1	11.9	0.872	31	204-281 (381)	97-177 (614)
6ysq_D	The hC4Nb8 complement inhibitory nanobody in complex with C4b	Homo sapiens	0.1	15	0.925	31	207-281 (381)	104-179 (635)
2win_B	C3 convertase (C3bBb) stabilized by SCIN	Homo sapiens	0.1	11.4	1.04	31	204-281 (381)	101-183 (901)
2win_D	C3 convertase (C3bBb) stabilized by SCIN	Homo sapiens	0.1	11.4	1.17	31	204-281 (381)	101-183 (901)
5cn1_C	Crystal structure of yeast GGA1_GAE domain-P21	Saccharomyces cerevisiae S288C	0.09	11.2	0.578	30	204-276 (381)	31-110 (112)
4b9j_A	Structure of self-complemented CssA subunit of enterotoxigenic Escherichia coli colonization factor CS6	Escherichia coli	0.09	10.7	0.406	30	207-280 (381)	29-123 (123)
3ilh_A	Crystal structure of Two component response regulator from Cytophaga hutchinsonii	Cytophaga hutchinsonii ATCC 33406	0.09	9.3	2.67	30	36-200 (381)	1-133 (133)
7xt6_C	Structure of a membrane protein M3	Homo sapiens	0.09	10.6	1.17	30	207-290 (381)	28-110 (139)
8bf9_B	Molecular view of ER membrane remodeling by the Sec61/TRAP translocon.	Ovis aries	0.09	9	0.34	30	207-290 (381)	35-125 (152)
6t5z_C	Crystal structure of an AA10 LPMO from Photorhabdus luminescens	Photorhabdus laumondii subsp. laumondii TTO1	0.09	13.3	0.578	30	207-282 (381)	90-174 (174)
7dmf_A	A de novo protein that rigidly extends the structure of tVHS-like domain in tepsin with a new designed domain	synthetic construct	0.09	14.6	3	30	286-379 (381)	26-131 (189)
4i0k_A	Crystal structure of murine B7-H3 extracellular domain	Mus musculus	0.09	8.4	0.578	30	204-280 (381)	131-199 (200)
4kkq_B	Crystal structure of Vibrio cholerae RbmA (crystal form 1)	Vibrio cholerae MJ-1236	0.09	7.7	0.613	30	204-282 (381)	148-229 (229)
5a1x_Q	The structure of the COPI coat linkage III	Mus musculus	0.09	8.5	0.383	30	208-280 (381)	139-230 (245)
5a1w_H	The structure of the COPI coat linkage II	Mus musculus	0.09	8.5	0.406	30	208-280 (381)	274-365 (380)
5fr0_A	The details of glycolipid glycan hydrolysis by the structural analysis of a family 123 glycoside hydrolase from Clostridium perfringens	Clostridium perfringens	0.09	13.7	0.513	30	207-282 (381)	52-160 (576)
1wcq_C	Mutagenesis of the Nucleophilic Tyrosine in a Bacterial Sialidase to Phenylalanine.	Micromonospora viridifaciens	0.09	13.7	1.17	30	207-281 (381)	387-453 (599)
4ziu_A	Crystal structure of native alpha-2-macroglobulin from Escherichia coli spanning the residues from domain MG7 to the C-terminus.	Escherichia coli K-12	0.09	9.1	1.57	30	204-282 (381)	29-112 (639)
8enu_H	Structure of the C3bB proconvertase in complex with lufaxin	Homo sapiens	0.09	11.6	1.77	30	209-282 (381)	105-178 (892)
8cem_B	Structure of bovine native C3, re-refinement	Bos taurus	0.09	10.4	1.32	30	204-281 (381)	171-253 (974)
4or1_A	Structure and mechanism of fibronectin binding and biofilm formation of enteroaggregative Escherischia coli AAF fimbriae	Escherichia coli	0.08	11.3	1.1	29	204-280 (381)	27-129 (129)
2e9g_MODEL_2_A	Solution structure of the alpha adaptinC2 domain from human Adapter-related protein complex 1 gamma 2 subunit	Homo sapiens	0.08	13.9	0.872	29	204-275 (381)	46-122 (131)
3q48_A	Crystal structure of Pseudomonas aeruginosa CupB2 chaperone	Pseudomonas aeruginosa	0.08	11.7	1.1	29	207-286 (381)	25-114 (194)
6leg_C	Structure of E. coli beta-glucuronidase complex with uronic isofagomine	Escherichia coli	0.08	8.9	0.775	29	204-276 (381)	204-271 (599)
2ber_A	Y370G Active Site Mutant of the Sialidase from Micromonospora viridifaciens in complex with beta-Neu5Ac (sialic acid).	Micromonospora viridifaciens	0.08	12.5	0.925	29	207-281 (381)	389-455 (601)
6ysq_C	The hC4Nb8 complement inhibitory nanobody in complex with C4b	Homo sapiens	0.08	11.7	1.4	29	204-281 (381)	99-179 (633)
2q3z_A	Transglutaminase 2 undergoes large conformational change upon activation	Homo sapiens	0.08	10.9	0.775	29	207-275 (381)	589-654 (655)
5o32_F	The structure of complement complex	Homo sapiens	0.08	10.9	1.57	29	205-281 (381)	106-182 (903)
7zgj_B	Trypanosoma brucei gambiense ISG65 in complex with human complement component C3	Homo sapiens	0.08	11.4	1.4	29	204-281 (381)	167-249 (970)
6ru5_B	human complement C3 in complex with the hC3Nb1 nanobody	Homo sapiens	0.08	10.2	1.57	29	204-281 (381)	168-250 (980)
1vrs_C	Crystal structure of the disulfide-linked complex between the N-terminal and C-terminal domain of the electron transfer catalyst DsbD	Escherichia coli str. K-12 substr. W3110	0.08	12.3	1.04	28	211-276 (381)	37-110 (113)
3gw4_A	Crystal structure of uncharacterized protein from Deinococcus radiodurans. Northeast Structural Genomics Consortium Target DrR162B.	Deinococcus radiodurans R1 = ATCC 13939 = DSM 20539	0.08	16.6	5.74	28	286-378 (381)	87-183 (192)
6ka1_A	E.coli Malate dehydrogenase	Escherichia coli K-12	0.08	10.9	1.24	28	37-197 (381)	1-131 (307)
5e6w_A	Re-refinement of the Crystal Structure of the Plexin-Semaphorin-Integrin Domain/Hybrid Domain/I-EGF1 Segment from the Human Integrin b2 Subunit	Homo sapiens	0.08	9.4	1.04	28	207-275 (381)	99-176 (310)
7akk_E	Structure of a complement factor-receptor complex	Homo sapiens	0.08	11.1	1.77	28	204-284 (381)	102-187 (504)
1evu_B	HUMAN FACTOR XIII WITH CALCIUM BOUND IN THE ION SITE	Homo sapiens	0.08	16	0.65	28	207-281 (381)	641-708 (708)
1f13_A	RECOMBINANT HUMAN CELLULAR COAGULATION FACTOR XIII	Homo sapiens	0.08	17	0.823	28	207-282 (381)	654-722 (722)
5jpm_B	Structure of the complex of human complement C4 with MASP-2 rebuilt using iMDFF	Homo sapiens	0.08	12.9	2.37	28	204-282 (381)	175-256 (740)
7sqc_2B	Ciliary C1 central pair apparatus isolated from Chlamydomonas reinhardtii	Chlamydomonas reinhardtii	0.08	10	1.67	28	204-279 (381)	482-555 (754)
2wii_B	Complement C3b in complex with factor H domains 1-4	Homo sapiens	0.08	12.1	1.77	28	207-281 (381)	104-182 (896)
5fo7_B	Crystal Structure of Human Complement C3b at 2.8 Angstrom resolution	Homo sapiens	0.08	11.2	2.24	28	205-281 (381)	106-182 (900)
3g6j_D	C3b in complex with a C3b specific Fab	Homo sapiens	0.08	11.8	2.11	28	209-281 (381)	110-182 (903)
7sqc_O0	Ciliary C1 central pair apparatus isolated from Chlamydomonas reinhardtii	Chlamydomonas reinhardtii	0.08	12.5	1.77	28	206-284 (381)	587-658 (1140)
4lnv_C	Crystal Structure of TEP1s	Anopheles gambiae	0.08	14.8	1.99	28	206-282 (381)	231-305 (1276)
2b39_B	Structure of mammalian C3 with an intact thioester at 3A resolution	Bos taurus	0.08	9.2	2.37	28	209-282 (381)	817-890 (1610)
5nhi_A	Crystal structure of the Escherichia coli N-terminal domain of DsbD (nDsbD) without the cap-loop region	Escherichia coli	0.07	13.2	1.04	27	209-283 (381)	36-111 (111)
3jvc_A	Crystal Structure of the Lipoprotein_17 domain from Q9PRA0_UREPA protein of Ureaplasma parvum. Northeast Structural Genomics Consortium Target UuR17a.	Ureaplasma parvum serovar 3 str. ATCC 700970	0.07	11.6	2.52	27	250-292 (381)	71-112 (116)
7q3r_G	Crystal structure of SARS-CoV-2 RBD in complex with the neutralizing nanobodies VHH-F04 and VHH-G09	Vicugna pacos	0.07	6.1	1.1	27	208-282 (381)	27-120 (121)
1gyw_A	Gamma-adaptin appendage domain from clathrin adaptor AP1 A753D mutant	Mus musculus	0.07	19	2.24	27	204-276 (381)	41-118 (126)
7tj9_B	Cryo-EM structure of the human Nax channel in complex with beta3 solved in GDN	Homo sapiens	0.07	7.9	0.65	27	207-290 (381)	30-134 (162)
6twe_MODEL_13_A	Cu(I) NMR solution structure of the chitin-active lytic polysaccharide monooxygenase BlLPMO10A	Bacillus licheniformis DSM 13 = ATCC 14580	0.07	8.4	1.04	27	205-282 (381)	90-172 (172)
3ihu_B	Crystal structure of DNA binding protein (YP_298823.1) from Ralstonia eutropha JMP134 at 1.92 A resolution	Cupriavidus pinatubonensis JMP134	0.07	14.6	2.67	27	279-377 (381)	63-166 (204)
5vl3_T	CD22 d1-d3 in complex with therapeutic Fab Epratuzumab	Homo sapiens	0.07	7.6	0.981	27	208-279 (381)	133-199 (289)
4kty_B	Fibrin-stabilizing factor with a bound ligand	Homo sapiens	0.07	16.8	1.24	27	207-284 (381)	628-698 (698)
5es4_E	RE-REFINEMENT OF INTEGRIN ALPHAXBETA2 ECTODOMAIN IN THE CLOSED/BENT CONFORMATION	Homo sapiens	0.07	6.5	1.17	27	207-285 (381)	457-558 (884)
5fo8_B	Crystal Structure of Human Complement C3b in Complex with MCP (CCP1-4)	Homo sapiens	0.07	12.6	2.67	27	208-282 (381)	108-182 (894)
2win_H	C3 convertase (C3bBb) stabilized by SCIN	Homo sapiens	0.07	11.3	2.11	27	204-282 (381)	101-184 (900)
6rur_H	Structure of the SCIN stabilized C3bBb convertase bound to properdin	Homo sapiens	0.07	11.6	2.67	27	209-281 (381)	111-183 (913)
7q60_A	Structure of TEV cleaved A2ML1 (A2ML1-TE)	Homo sapiens	0.07	14.8	1.17	27	203-281 (381)	25-99 (1212)
1gyu_A	Gamma-adaptin appendage domain from clathrin adaptor AP1	Mus musculus	0.06	17.5	1.67	26	204-276 (381)	35-112 (120)
1iu1_A	Crystal structure of human gamma1-adaptin ear domain	Homo sapiens	0.06	17.2	1.77	26	204-276 (381)	35-112 (120)
2pih_B	Crystal structure of Protein ymcA from Bacillus subtilis, NorthEast Structural Genomics target SR375	Bacillus subtilis	0.06	8.6	5.41	26	282-378 (381)	1-104 (123)
6dnv_B	Crystal Structure of Neisseria meningitidis DsbD n-terminal domain in the reduced form	Neisseria meningitidis alpha14	0.06	10.6	0.65	26	204-280 (381)	28-117 (125)
1p4u_A	CRYSTAL STRUCTURE OF GGA3 GAE DOMAIN IN COMPLEX WITH RABAPTIN-5 PEPTIDE	Homo sapiens	0.06	10.4	3.19	26	204-278 (381)	53-134 (145)
6ro0_G	CRYSTAL STRUCTURE OF GENETICALLY DETOXIFIED PERTUSSIS TOXIN GDPT.	Bordetella pertussis	0.06	20.4	0.925	26	240-283 (381)	128-173 (222)
1bcp_A	BINARY COMPLEX OF PERTUSSIS TOXIN AND ATP	Bordetella pertussis	0.06	20.4	0.981	26	240-283 (381)	128-173 (224)
3mjg_Y	The structure of a platelet derived growth factor receptor complex	Homo sapiens	0.06	10.1	0.981	26	204-281 (381)	198-273 (273)
5mj4_A	INTERLEUKIN-23 COMPLEX WITH AN ANTAGONISTIC ALPHABODY, CRYSTAL FORM 2	Homo sapiens	0.06	12.6	3.8	26	209-279 (381)	131-201 (289)
7ram_D	Cryo-EM Structure of the HCMV gHgLgO Trimer Derived from AD169 and TR strains in complex with PDGFRalpha	Homo sapiens	0.06	7.9	1.48	26	204-282 (381)	214-289 (289)
2q0z_X	Crystal structure of Q9P172/Sec63 from Homo sapiens. Northeast Structural Genomics Target HR1979.	Homo sapiens	0.06	13.2	1.77	26	194-282 (381)	214-290 (290)
5vl3_Q	CD22 d1-d3 in complex with therapeutic Fab Epratuzumab	Homo sapiens	0.06	8.9	1.57	26	210-282 (381)	146-215 (303)
5vkm_A	Crystal structure of human CD22 Ig domains 1-3 in complex with alpha 2-6 sialyllactose	Homo sapiens	0.06	9.5	1.32	26	206-281 (381)	145-216 (306)
5ow3_C	Crystal structure of a C-terminally truncated trimeric ectodomain of the Arabidopsis thaliana gamete fusion protein HAP2	Arabidopsis thaliana	0.06	12.1	1.88	26	209-280 (381)	378-445 (446)
1euu_A	SIALIDASE OR NEURAMINIDASE, LARGE 68KD FORM	Micromonospora viridifaciens	0.06	15.5	1.99	26	205-276 (381)	387-452 (601)
1ggy_A	HUMAN FACTOR XIII WITH YTTERBIUM BOUND IN THE ION SITE	Homo sapiens	0.06	15.1	1.17	26	207-281 (381)	635-702 (702)
7q5z_A	Cryo-EM structure of native human A2ML1	Homo sapiens	0.06	9	3	26	204-282 (381)	710-804 (1344)
6s8d_H	Structure of ZEBOV GP in complex with 1T0227 antibody	Homo sapiens	0.06	11.4	2.67	25	208-282 (381)	29-122 (122)
1na8_A	Crystal structure of ADP-ribosylation factor binding protein GGA1	Homo sapiens	0.06	11.6	1.77	25	204-278 (381)	59-140 (151)
4pac_A	Crystal Structure of Histidine-containing Phosphotransfer Protein AHP2 from Arabidopsis thaliana	Arabidopsis thaliana	0.06	14.5	5.74	25	294-378 (381)	53-143 (153)
5opf_A	Structure of LPMO10B from from Micromonospora aurantiaca	Micromonospora aurantiaca ATCC 27029	0.06	13.3	2.67	25	207-277 (381)	110-193 (194)
6srv_MMM	Structure of the arginase-2-inhibitory human antigen-binding fragment Fab C0021144	Homo sapiens	0.06	13.8	1.17	25	204-284 (381)	22-112 (213)
6ro0_A	CRYSTAL STRUCTURE OF GENETICALLY DETOXIFIED PERTUSSIS TOXIN GDPT.	Bordetella pertussis	0.06	20.4	1.32	25	240-283 (381)	128-173 (224)
5njd_I	Structure of Interleukin 23 in complex with Briakinumab FAb	Homo sapiens	0.06	7.9	2.37	25	209-279 (381)	131-207 (292)
3duh_A	Structure of Interleukin-23	Homo sapiens	0.06	14.2	6.46	25	209-279 (381)	132-201 (300)
5fx8_U	Complete structure of manganese lipoxygenase of Gaeumannomyces graminis and partial structure of zonadhesin of Komagataella pastoris	Komagataella phaffii CBS 7435	0.06	9.7	3	25	207-282 (381)	176-295 (309)
5lfv_B	Crystal structure of glycosylated Myelin-associated glycoprotein (MAG) Ig1-3 with soaked trisaccharide ligand	Mus musculus	0.06	7.5	2.52	25	205-279 (381)	150-218 (311)
4kh9_A	Crystal structure of a DUF4785 family protein (lpg0956) from Legionella pneumophila subsp. pneumophila str. Philadelphia 1 at 2.00 A resolution	Legionella pneumophila subsp. pneumophila str. Philadelphia 1	0.06	11.1	2.37	25	207-281 (381)	189-258 (361)
1qrk_A	HUMAN FACTOR XIII WITH STRONTIUM BOUND IN THE ION SITE	Homo sapiens	0.06	16.6	1.17	25	207-281 (381)	633-700 (700)
6d7j_C	The Crystal Structure of Parabacteroides merdae Beta-Glucuronidase (GUS) with Glycerol in Active-Site	Parabacteroides merdae CL03T12C32	0.06	11.3	3.19	25	208-279 (381)	215-287 (789)
3l5n_B	Staphylococcal Complement Inhibitor (SCIN) in complex with Human Complement Component C3b	Homo sapiens	0.06	12.2	2.83	25	204-282 (381)	101-184 (891)
7tv9_B	HUMAN COMPLEMENT COMPONENT C3B IN COMPLEX WITH APL-1030	Homo sapiens	0.06	11.6	3	25	204-281 (381)	100-182 (902)
7noz_B	Structure of the nanobody stablized properdin bound alternative pathway proconvertase C3b:FB:FP	Homo sapiens	0.06	11.2	3.58	25	205-281 (381)	106-182 (906)
7q62_A	Structure of TEV cleaved A2ML1 dimer (A2ML1-TT dimer)	Homo sapiens	0.06	16.6	1.57	25	203-284 (381)	25-102 (1223)
7von_A	Native alpha-2-macroglobulin monomer	Homo sapiens	0.06	10.9	1.88	25	204-276 (381)	745-833 (1399)
4q9c_A	IgNAR antibody domain C3	Ginglymostoma cirratum	0.05	11.6	1.48	24	210-276 (381)	38-103 (105)
4q97_B	IgNAR antibody domain C1	Ginglymostoma cirratum	0.05	10.9	2.11	24	210-276 (381)	44-107 (108)
7wp2_L	Cryo-EM structure of SARS-CoV-2 C.1.2 S6P trimer in complex with neutralizing antibody VacW-209 (local refinement)	Homo sapiens	0.05	10.1	1.4	24	210-282 (381)	31-109 (109)
3c6l_H	Crystal structure of mouse MHC class II I-Ab/3K peptide complexed with mouse TCR 2W20	Mus musculus	0.05	12.6	1.77	24	204-275 (381)	124-190 (192)
7lf9_A	Structure of Hyperglycosylated Human IgG1 Fc (Fc329)	Homo sapiens	0.05	8.8	2.52	24	205-276 (381)	34-101 (207)
3sbw_C	Crystal structure of the complex between the extracellular domains of mouse PD-1 mutant and human PD-L1	Homo sapiens	0.05	9.6	1.99	24	204-282 (381)	142-208 (208)
6uud_H	Crystal structure of antibody 5D5 in complex with PfCSP N-terminal peptide	Mus musculus	0.05	6.8	1.48	24	203-282 (381)	147-219 (220)
5vl3_S	CD22 d1-d3 in complex with therapeutic Fab Epratuzumab	Homo sapiens	0.05	7.5	2.11	24	208-282 (381)	141-212 (299)
7sqc_F0	Ciliary C1 central pair apparatus isolated from Chlamydomonas reinhardtii	Chlamydomonas reinhardtii	0.05	11.5	2.24	24	204-276 (381)	235-305 (308)
4kh9_B	Crystal structure of a DUF4785 family protein (lpg0956) from Legionella pneumophila subsp. pneumophila str. Philadelphia 1 at 2.00 A resolution	Legionella pneumophila subsp. pneumophila str. Philadelphia 1	0.05	11.1	2.67	24	207-281 (381)	185-254 (360)
7ck3_B	Crystal structure of Arabidopsis CESA3 catalytic domain	Arabidopsis thaliana	0.05	6.2	3	24	35-79 (381)	1-45 (369)
7b2q_B	Cryo-EM structure of complement C4b in complex with nanobody B12	Homo sapiens	0.05	12.6	5.1	24	207-281 (381)	95-168 (600)
1w8o_A	Contribution of the Active Site Aspartic Acid to Catalysis in the Bacterial Neuraminidase from Micromonospora viridifaciens	Micromonospora viridifaciens	0.05	12.5	2.67	24	207-281 (381)	389-455 (601)
3s3s_A	Transglutaminase 2 in complex with a novel inhibitor	Homo sapiens	0.05	18.9	1.4	24	205-275 (381)	554-619 (620)
5mhn_B	FXIIIa in complex with the inhibitor ZED2360	Homo sapiens	0.05	16.2	2.37	24	207-276 (381)	620-684 (685)
4kty_A	Fibrin-stabilizing factor with a bound ligand	Homo sapiens	0.05	18.9	1.88	24	207-276 (381)	630-694 (695)
1fie_A	RECOMBINANT HUMAN COAGULATION FACTOR XIII	Homo sapiens	0.05	16	1.32	24	207-281 (381)	638-705 (705)
6d7j_A	The Crystal Structure of Parabacteroides merdae Beta-Glucuronidase (GUS) with Glycerol in Active-Site	Parabacteroides merdae CL03T12C32	0.05	13.9	3.38	24	208-279 (381)	214-286 (799)
6dxu_B	Crystal Structure of Parabacteroides merdae Beta-Glucuronidase (GUS)	Parabacteroides merdae ATCC 43184	0.05	13.9	3.19	24	208-279 (381)	210-282 (803)
7q1y_B	X-ray structure of human A2ML1	Homo sapiens	0.05	16.6	1.4	24	203-281 (381)	24-98 (1374)
7som_D	Ciliary C2 central pair apparatus isolated from Chlamydomonas reinhardtii	Chlamydomonas reinhardtii	0.05	8.7	2.83	24	204-282 (381)	621-691 (1516)
1i4z_A	THE CRYSTAL STRUCTURE OF PHASCOLOPSIS GOULDII L98Y METHEMERYTHRIN	Phascolopsis gouldii	0.04	16.6	5.41	23	298-376 (381)	24-103 (113)
6vi4_D	Nanobody-Enabled Monitoring of Kappa Opioid Receptor States	Lama glama	0.04	9	7.27	23	240-282 (381)	71-114 (117)
6gjq_F	human NBD1 of CFTR in complex with nanobody T27	Lama glama	0.04	9.4	4.28	23	207-282 (381)	30-120 (121)
6prh_A	X-ray Crystal Structure of Bacillus subtilis RicA	Bacillus subtilis subsp. subtilis str. 168	0.04	8.6	8.67	23	282-378 (381)	2-105 (122)
4frw_F	Crystal structure of human nectin-4 extracellular fragment D1-D2	Homo sapiens	0.04	12	3.58	23	210-282 (381)	124-188 (189)
5anm_E	Crystal structure of IgE Fc in complex with a neutralizing antibody	Homo sapiens	0.04	10.6	1.67	23	209-276 (381)	36-99 (206)
4cbe_A	Crystal structure of complement factors H and FHL-1 binding protein BBH06 or CRASP-2 from Borrelia burgdorferi (Native)	Borreliella burgdorferi B31	0.04	12.2	7.27	23	297-379 (381)	23-113 (209)
3d69_A	Crystal Structure of the Fab Fragment of an Anti-Factor IX Antibody 10C12	Homo sapiens	0.04	7.1	1.77	23	204-284 (381)	20-110 (211)
3j8f_7	Cryo-EM reconstruction of poliovirus-receptor complex	Homo sapiens	0.04	14.6	2.24	23	203-279 (381)	141-213 (306)
5f9m_D	Crystal structure of native B3275, member of MccF family of enzymes	Bacillus cereus ATCC 10987	0.04	10.9	2.24	23	28-221 (381)	2-177 (344)
8gum_B	Chitin-active AA10 LPMO (GbpA) from Vibrio campbellii	Vibrio campbellii ATCC BAA-1116	0.04	11.1	5.74	23	207-285 (381)	100-182 (360)
7b2p_A	Cryo-EM structure of complement C4b in complex with nanobody B5	Homo sapiens	0.04	9.2	5.1	23	207-282 (381)	152-217 (650)
7q61_A	Structure of TEV conjugated A2ML1 (A2ML1-TC)	Homo sapiens	0.04	10.2	7.27	23	204-282 (381)	717-811 (1210)
6tav_A	Crystal structure of endopeptidase-induced alpha2-macroglobulin	Homo sapiens	0.04	8.8	4.54	23	207-276 (381)	1324-1412 (1416)
4e0s_A	Crystal Structure of C5b-6	Homo sapiens	0.04	8.3	5.1	23	204-282 (381)	742-818 (1552)
5w5l_A	Crystal structure of human IgG1-Sigma Fc fragment	Homo sapiens	0.04	7.8	3.38	22	210-276 (381)	142-207 (209)
8dgu_L	Crystal structure of SARS-CoV-2 spike stem helix peptide in complex with Fab of broadly neutralizing antibody CC25.106 isolated from a vaccinated COVID-19 convalescent	Homo sapiens	0.04	12.3	4.28	22	205-284 (381)	29-112 (213)
6uqc_D	Mouse IgG2a Bispecific Fc	Mus musculus	0.04	10.1	1.88	22	210-282 (381)	39-105 (215)
5oyj_C	Crystal structure of VEGFR-2 domains 4-5 in complex with DARPin D4b	Homo sapiens	0.04	11.3	2.37	22	204-276 (381)	33-93 (223)
5lfr_A	Crystal structure of glycosylated Myelin-associated glycoprotein (MAG) Ig1-3	Mus musculus	0.04	6.6	4.54	22	210-279 (381)	149-215 (310)
7ck2_A	Crystal structure of Arabidopsis CESA3 catalytic domain with UDP-Glucose	Arabidopsis thaliana	0.04	8.5	5.41	22	35-79 (381)	1-45 (352)
7ssh_G	Single chain trimer HLA-A*02:01 (Y108A) with HPV.16 E7 peptide YMLDLQPETTDLYC	Human papillomavirus type 16	0.04	9.7	7.71	22	210-276 (381)	321-381 (382)
5y9h_A	Crystal structure of SafDAA-dsc complex	Salmonella enterica subsp. enterica serovar Typhimurium	0.04	11.9	2.83	22	207-284 (381)	175-290 (430)
6jak_D	OtsA apo structure	Escherichia coli	0.04	8.8	2.83	22	36-200 (381)	248-407 (447)
7q62_B	Structure of TEV cleaved A2ML1 dimer (A2ML1-TT dimer)	Homo sapiens	0.04	23.4	2.37	22	206-281 (381)	28-99 (822)
6vi4_C	Nanobody-Enabled Monitoring of Kappa Opioid Receptor States	Lama glama	0.03	6.9	5.41	21	208-282 (381)	30-117 (118)
7shz_G	IgE-Fc in complex with HAE	Homo sapiens	0.03	11.3	3.38	21	205-276 (381)	32-93 (202)
7rp2_I	Crystal structure of Kas G12C in complex with 2H11 CLAMP	Homo sapiens	0.03	11.3	5.41	21	206-284 (381)	29-111 (215)
5j74_B	Fluorogen activating protein AM2.2 in complex with TO1-2p	Homo sapiens	0.03	9.4	7.71	21	209-284 (381)	30-122 (233)
4b60_A	Structure of rFnBPA(189-505) in complex with fibrinogen gamma chain C- terminal peptide	Staphylococcus aureus subsp. aureus NCTC 8325	0.03	5.6	6.46	21	207-284 (381)	181-300 (300)
3o4o_B	Crystal structure of an Interleukin-1 receptor complex	Homo sapiens	0.03	13.5	4.28	21	210-286 (381)	148-215 (323)
5fwx_B	Crystal structure of the AMPA receptor GluA2/A4 N-terminal domain heterodimer	Rattus norvegicus	0.03	8.9	4.28	21	35-161 (381)	2-95 (375)
7rno_MODEL_3_C	Model of the Ac-6-FP/hpMR1/bB2m/TAPBPR complex from integrated docking, NMR and restrained MD	Homo sapiens	0.03	10.1	2.52	21	210-287 (381)	310-381 (382)
5foa_B	Crystal Structure of Human Complement C3b in complex with DAF (CCP2-4)	Homo sapiens	0.03	12.3	5.41	21	207-280 (381)	104-181 (902)
3prx_D	Structure of Complement C5 in Complex with CVF and SSL7	Naja kaouthia	0.03	11.6	7.71	21	204-282 (381)	720-802 (1215)
6lof_C	Crystal structure of ZsYellow soaked by Cu2+	Zoanthus sp.	0.03	6.6	4.03	20	251-290 (381)	14-58 (60)
5m94_B	Crystal structure of Staphylococcus capitis divalent metal ion transporter (DMT) in complex with nanobody	Lama glama	0.03	7.2	4.03	20	207-282 (381)	30-119 (120)
6h72_C	GI.1 human norovirus protruding domain in complex with Nano-94 and 2-fucosyllactose (2FL)	Vicugna pacos	0.03	7.7	6.09	20	205-282 (381)	28-120 (121)
3uiz_C	Crystal structure of SefD_dscA in D2O	Salmonella enterica subsp. enterica serovar Enteritidis	0.03	10	3	20	202-285 (381)	21-133 (134)
7ski_B	Pertussis toxin in complex with PJ34	Bordetella pertussis	0.03	13.4	4.28	20	234-285 (381)	119-165 (175)
4p5m_F	Structural Basis of Chronic Beryllium Disease: Bridging the Gap Between Allergic Hypersensitivity and Autoimmunity	Homo sapiens	0.03	9.8	4.28	20	210-276 (381)	129-189 (190)
1i1a_C	CRYSTAL STRUCTURE OF THE NEONATAL FC RECEPTOR COMPLEXED WITH A HETERODIMERIC FC	Rattus norvegicus	0.03	13.5	3.19	20	210-276 (381)	37-99 (205)
6s5a_D	CRYSTAL STRUCTURE OF FC P329G LALA WITH ANTI FC P329G FAB	Homo sapiens	0.03	9.2	3.8	20	210-276 (381)	143-208 (209)
6moh_D	Dimeric DARPin C_R3 complex with EpoR	Homo sapiens	0.03	10.9	3.8	20	209-282 (381)	149-211 (211)
7n28_J	Cryo-EM structure of broadly neutralizing V2-apex-targeting antibody J033 in complex with HIV-1 Env	Homo sapiens	0.03	8.8	4.54	20	203-275 (381)	145-214 (216)
5ijv_F	Crystal structure of bovine Fab E03	Bos taurus	0.03	13.7	4.03	20	208-284 (381)	182-249 (249)
6yny_g1	Cryo-EM structure of Tetrahymena thermophila mitochondrial ATP synthase - F1Fo composite dimer model	Tetrahymena thermophila	0.03	9.1	8.17	20	31-124 (381)	63-147 (275)
5vl3_R	CD22 d1-d3 in complex with therapeutic Fab Epratuzumab	Homo sapiens	0.03	8.5	4.28	20	209-282 (381)	136-206 (290)
5lgj_B	THE CRYSTAL STRUCTURE OF IGE FC MUTANT - P333C	Homo sapiens	0.03	9.4	4.03	20	210-276 (381)	135-197 (309)
3vmk_A	3-isopropylmalate dehydrogenase from Shewanella benthica DB21 MT-2	Shewanella benthica	0.03	8.5	6.09	20	35-81 (381)	6-50 (369)
4dcs_A	Crystal Structure of B. subtilis EngA in complex with sulfate ion and GDP	Bacillus subtilis	0.03	12.6	4.03	20	30-198 (381)	144-312 (406)
5y9h_C	Crystal structure of SafDAA-dsc complex	Salmonella enterica subsp. enterica serovar Typhimurium	0.03	9.4	4.54	20	207-284 (381)	171-287 (421)
3lpf_A	Structure of E. coli beta-Glucuronidase bound with a novel, potent inhibitor 1-((6,7-dimethyl-2-oxo-1,2-dihydroquinolin-3-yl)methyl)-1-(2-hydroxyethyl)-3-(3-methoxyphenyl)thiourea	Escherichia coli K-12	0.03	12.5	3.19	20	203-276 (381)	207-272 (603)
6za2_A	Crystal structure of dimeric latent PorU from Porphyromonas gingivalis	Porphyromonas gingivalis ATCC 33277	0.03	9.3	5.1	20	207-285 (381)	760-852 (1081)
7voo_A	Induced alpha-2-macroglobulin monomer	Homo sapiens	0.03	10.6	4.03	20	207-282 (381)	745-834 (1244)
6tav_B	Crystal structure of endopeptidase-induced alpha2-macroglobulin	Homo sapiens	0.03	11.8	5.1	20	207-282 (381)	753-842 (1273)
4d94_A	Crystal Structure of TEP1r	Anopheles gambiae	0.03	15.8	3.8	20	206-282 (381)	225-299 (1274)
1z5l_B	Structure of a highly potent short-chain galactosyl ceramide agonist bound to CD1D	Mus musculus	0.02	9.2	4.81	19	210-279 (381)	34-98 (98)
7ul3_C	CryoEM Structure of Inactive H2R Bound to Famotidine, Nb6M, and NabFab	synthetic construct	0.02	6.8	5.41	19	204-282 (381)	21-116 (117)
4ole_B	Crystal structure of a neighbor of BRCA1 gene 1 (NBR1) from Homo sapiens at 2.52 A resolution	Homo sapiens	0.02	11.3	3.19	19	201-282 (381)	37-120 (120)
5dj8_B	Fc Heterodimer Design 7.7 D399M/Y407A + T366V/K409I	Homo sapiens	0.02	9.2	3.8	19	210-276 (381)	141-206 (207)
7lfn_A	Structure of Hyperglycosylated Human IgG1 Fc (Fc267_329)	Homo sapiens	0.02	8.1	4.81	19	210-276 (381)	39-101 (207)
6d4n_B	Crystal structure of a Fc fragment of Rhesus macaque (Macaca mulatta) IgG4	Macaca mulatta	0.02	9.3	6.85	19	210-276 (381)	141-206 (208)
5m3v_A	BEAT Fc	Homo sapiens	0.02	7.8	4.03	19	210-276 (381)	141-206 (208)
4jlr_B	Crystal structure of a designed Respiratory Syncytial Virus Immunogen in complex with Motavizumab	Homo sapiens	0.02	8.3	5.1	19	210-276 (381)	145-209 (210)
6pdx_P	Crystal structure of C585 Fab in complex with influenza virus hemagglutinin from A/Switzerland/9715293/2013 (H3N2)	Homo sapiens	0.02	5.9	5.1	19	203-276 (381)	138-211 (214)
7u0e_A	Crystal Structure of C13C9 Fab in complex with SARS-CoV-2 S fusion peptide	Homo sapiens	0.02	9.5	5.1	19	207-284 (381)	29-127 (223)
4mdr_A	Crystal structure of adaptor protein complex 4 (AP-4) mu4 subunit C-terminal domain D190A mutant, in complex with a sorting peptide from the amyloid precursor protein (APP)	Homo sapiens	0.02	13.1	2.52	19	207-281 (381)	143-231 (245)
5jp2_A	Fcho1 Mu homology domain (Danio Rerio) with bound Eps15 peptide	Danio rerio	0.02	7.3	2.24	19	207-282 (381)	166-256 (272)
5opi_C	Crystal structure of the TAPBPR-MHC I peptide editing complex	Homo sapiens	0.02	13.1	4.28	19	209-276 (381)	266-329 (332)
5f1y_A	Crystal structure of Ba3275, the member of S66 family of serine peptidases	Bacillus cereus ATCC 10987	0.02	11.6	6.46	19	29-166 (381)	2-117 (343)
1cnz_A	3-ISOPROPYLMALATE DEHYDROGENASE (IPMDH) FROM SALMONELLA TYPHIMURIUM	Salmonella enterica subsp. enterica serovar Typhimurium	0.02	13	7.27	19	36-81 (381)	3-46 (363)
3vml_A	Chimera 3-isopropylmalate dehydrogenase between Shewanella oneidensis MR-1 (O) and Shewanella benthica DB21 MT-2 (M) from N-terminal: 20% O middle 70% M residual 10% O	Shewanella oneidensis MR-1	0.02	11.1	6.85	19	37-81 (381)	2-44 (363)
1to6_A	Glycerate kinase from Neisseria meningitidis (serogroup A)	Neisseria meningitidis serogroup A	0.02	8.6	5.74	19	38-82 (381)	1-45 (371)
4ofy_F	Crystal Structure of the Complex of SYG-1 D1-D2 and SYG-2 D1-D4	Caenorhabditis elegans	0.02	12.8	6.46	19	207-279 (381)	141-209 (407)
7xq8_v	Structure of human B-cell antigen receptor of the IgM isotype	Homo sapiens	0.02	7.8	6.09	19	207-276 (381)	375-440 (595)
5mhl_A	FXIIIa in complex with the inhibitor Mi0621	Homo sapiens	0.02	18.9	5.1	19	207-276 (381)	626-690 (692)
6wlb_B	Structure of homotrimeric poplar cellulose synthase isoform 8	Populus tremula x Populus tremuloides	0.02	7.6	9.75	19	30-79 (381)	88-137 (720)
5d1q_E	IsdB NEAT2 bound by clone D2-06	Staphylococcus aureus RF122	0.02	9.7	5.74	18	200-276 (381)	39-109 (118)
7zkz_C	Crystal structure of cystinosin from Arabidopsis thaliana bound to two nanobodies	Lama glama	0.02	6.8	5.1	18	204-281 (381)	24-120 (122)
1ksh_B	Complex of Arl2 and PDE delta, Crystal Form 2 (native)	Homo sapiens	0.02	10.9	4.81	18	207-282 (381)	70-142 (142)
1s9v_B	Crystal structure of HLA-DQ2 complexed with deamidated gliadin peptide	Homo sapiens	0.02	9.5	6.85	18	210-276 (381)	120-180 (181)
4h26_B	TCR interaction with peptide mimics of nickel offers structure insight to nickel contact allergy	Homo sapiens	0.02	12.5	6.85	18	210-276 (381)	127-187 (188)
4d8p_D	Structural and functional studies of the trans-encoded HLA-DQ2.3 (DQA1*03:01/DQB1*02:01) molecule	Triticum aestivum	0.02	9.5	5.74	18	210-276 (381)	132-192 (193)
5v4n_F	Structure of HLA-DR1 with bound alpha3(135-145) peptide	Homo sapiens	0.02	9.5	6.09	18	210-276 (381)	136-196 (197)
7pi2_C	PfCyRPA bound to monoclonal antibody Cy.003 Fab fragment	Gallus gallus	0.02	6.6	5.1	18	210-276 (381)	142-206 (208)
3h9z_B	Crystal structure of the IgE-Fc3-4 domains	Homo sapiens	0.02	10.2	6.46	18	206-276 (381)	33-99 (209)
4n0u_E	Ternary complex between Neonatal Fc receptor, serum albumin and Fc	Homo sapiens	0.02	10.6	9.75	18	210-276 (381)	142-207 (209)
7vag_L	Cryo-EM structure of human NTCP complexed with YN69202Fab in the presence of myristoylated preS1 peptide	Mus musculus	0.02	5.2	4.03	18	208-276 (381)	147-215 (216)
8eqa_B	Crystal structure of human anti-N1 neuraminidase 2H08 Fab	Homo sapiens	0.02	5.1	6.85	18	207-284 (381)	31-123 (217)
7dd2_E	S-3C1-F2 structure, two RBDs are up and one RBD is down, the two up RBD bind with a 3C1 fab.	Mus musculus	0.02	7.8	3.8	18	207-284 (381)	28-119 (221)
6yjp_C	Crystal structure of a complex between glycosylated NKp30 and its deglycosylated tumour ligand B7-H6	Homo sapiens	0.02	6.3	6.09	18	209-276 (381)	152-222 (225)
6eyo_A	Structure of extended IgE-Fc in complex with two anti-IgE Fabs	Homo sapiens	0.02	9.4	5.74	18	210-276 (381)	138-200 (307)
5uwv_F	Crystal structure of Mycobacterium abscessus L,D-transpeptidase 2	Mycobacteroides abscessus ATCC 19977	0.02	10.5	6.85	18	204-284 (381)	25-92 (337)
2a73_A	Human Complement Component C3	Homo sapiens	0.02	15.2	7.27	18	205-282 (381)	130-199 (635)
2g5z_A	Structure of S65G Y66S GFP variant after spontaneous peptide hydrolysis and decarboxylation	Aequorea victoria	0.02	4.4	8.17	17	251-290 (381)	16-60 (62)
3rur_B	Staphylococcus aureus heme-bound selenomethionine-labeled IsdB-N2	Staphylococcus aureus subsp. aureus N315	0.02	10.9	6.46	17	200-276 (381)	39-109 (117)
7w9m_B	Cryo-EM structure of human Nav1.7(E406K) in complex with auxiliary beta subunits, ProTx-II and tetrodotoxin (S6IV pi helix conformer)	Homo sapiens	0.02	10.2	9.75	17	209-316 (381)	33-158 (173)
7zak_B	Crystal structure of HLA-DP (DPA1*02:01-DPB1*01:01) in complex with a peptide	Homo sapiens	0.02	5.4	8.17	17	210-276 (381)	117-177 (178)
1len_A	REFINEMENT OF TWO CRYSTAL FORMS OF LENTIL LECTIN AT 1.8 ANGSTROMS RESOLUTION	Lens culinaris	0.02	4.4	9.75	17	232-276 (381)	141-179 (181)
6u3n_A	LS2.8/3.15 - DQ2-P.fluor-alpha1a complex	Homo sapiens	0.02	9.2	5.74	17	210-278 (381)	117-181 (181)
6blq_B	Crystal Structure of IAg7 in complex with insulin mimotope p8E9E	Mus musculus	0.02	9.8	8.67	17	210-276 (381)	139-199 (200)
6uig_H	Crystal structure of human monoclonal antibody H7.200 in complex with H7N9 hemagglutinin HA1	Homo sapiens	0.02	9.4	6.46	17	208-275 (381)	154-217 (217)
6lir_D	crystal structure of chicken TCR for 2.0	Gallus gallus	0.02	7.9	8.67	17	204-280 (381)	143-221 (222)
5wer_F	Crystal Structure of TAPBPR and H2-Dd complex	Homo sapiens	0.02	7.6	5.74	17	206-281 (381)	144-221 (315)
2w92_A	Structure of a Streptococcus pneumoniae family 85 glycoside hydrolase, Endo-D, in complex with NAG-thiazoline.	Streptococcus pneumoniae TIGR4	0.02	9.6	7.27	17	206-284 (381)	562-636 (636)
8g2j_D	Hybrid aspen cellulose synthase-8 bound to UDP-glucose	Populus tremula x P. tremuloides/Amanita muscaria mixed EST library	0.02	10.9	9.75	17	29-81 (381)	91-139 (718)
6za2_B	Crystal structure of dimeric latent PorU from Porphyromonas gingivalis	Porphyromonas gingivalis ATCC 33277	0.02	8.3	8.17	17	207-285 (381)	762-854 (1083)
4ov5_N	Structure of HLA-DR1 with a bound peptide with non-optimal alanine in the P1 pocket	Homo sapiens	0.01	8.2	8.17	16	210-276 (381)	124-184 (185)
4p5m_H	Structural Basis of Chronic Beryllium Disease: Bridging the Gap Between Allergic Hypersensitivity and Autoimmunity	Homo sapiens	0.01	10.8	7.27	16	210-276 (381)	130-190 (191)
2ykl_L	Structure of human anti-nicotine Fab fragment in complex with nicotine-11-yl-methyl-(4-ethylamino-4-oxo)-butanoate	Homo sapiens	0.01	11	9.75	16	204-282 (381)	20-110 (200)
2y7q_B	THE HIGH-AFFINITY COMPLEX BETWEEN IGE AND ITS RECEPTOR FC EPSILON RI	Homo sapiens	0.01	8	9.75	16	209-276 (381)	134-199 (287)
5urm_A	Crystal structure of human BRR2 in complex with T-1206548	Homo sapiens	0.01	5.4	6.46	16	210-278 (381)	1655-1718 (1718)
6cpo_E	Crystal structure of DR15 presenting the RQ13 peptide	Homo sapiens	0.01	8.2	9.75	15	210-276 (381)	129-189 (190)
6f2z_B	Structure of a Fc mutant	Homo sapiens	0.01	7.8	9.2	15	210-276 (381)	141-206 (208)
1y18_H	Fab fragment of catalytic elimination antibody 34E4 E(H50)D mutant in complex with hapten	unclassified	0.01	6.7	9.75	15	203-284 (381)	152-226 (226)
5dk3_B	Crystal Structure of Pembrolizumab, a full length IgG4 antibody	Homo sapiens	0.01	8.6	8.67	15	199-276 (381)	250-334 (441)
